# Supplementary material for: Comparative quantitation of proteome alterations induced by aging or immortalization in primary human fibroblasts and keratinocytes for clinical applications
Source: Royal Society of Chemistry journal article supplement (doi:10.1039/c003962d), 2010-05-10
Supplement: c003962d_2.pdf [file c003962d_2.pdf]

**Supplementary Table 1: Fibroblast control.** Cell lysates were prepared from unlabeled (Arg0/Lys0) and labeled (Arg10/Lys fibroblasts after 14 cell doublings in culture (D14). Shown are normalized log2 transformed protein ratios of identified protei identification a minimum of 2 peptides per protein has to be identified (unique + razor). The database used for identification decoy database based on IPI v. 3.59 containing in total 160,820 entries. As a criterium for identification the posterior error probaility rate of identified proteins (PEP) is shown. The peptide numbers represent peptides used for quantitation.

| Protein ID   | Gene Symbol | Unique + Razor<br>Sequence<br>Coverage [%] | PEP       | Log2 Ratio | Peptide<br>No. | Variability<br>[%] | Quantil |
|--------------|-------------|--------------------------------------------|-----------|------------|----------------|--------------------|---------|
| IPI00021033; | COL3A1      | 11.1                                       | 5.91E-62  | -4.651     | 4              | 165.2              | Q1      |
| IPI00761105; | TADA2B      | 1.7                                        | 2.46E-02  | -4.494     | 2              | 57.9               | Q1      |
| IPI00152007  | ARHGEF17    | 2.3                                        | 5.41E-09  | -3.687     | 2              | 92.5               | Q1      |
| IPI00300725; | KRT6A       | 27                                         | 6.82E-61  | -3.299     | 4              | 204.0              | Q1      |
| IPI00022229; | APOB        | 0.7                                        | 5.68E-29  | -2.944     | 8              | 202.2              | Q1      |
| IPI00298860; | LTF         | 51                                         | 8.02E-197 | -2.834     | 13             | 105.6              | Q1      |
| IPI00384444; | KRT14       | 36.4                                       | 6.18E-85  | -2.542     | 13             | 143.3              | Q1      |
| IPI00305461; | ITIH2       | 5                                          | 2.86E-09  | -1.174     | 3              | 367.3              | Q1      |
| IPI00420088; | KIAA0174    | 7.5                                        | 9.34E-03  | -0.892     | 2              | 62.3               | Q1      |
| IPI00012887; | CTSL1       | 12                                         | 3.13E-21  | -0.618     | 3              | 47.8               | Q1      |
| IPI00375714; | HSPB7       | 17.1                                       | 1.31E-05  | -0.615     | 2              | 69.5               | Q1      |
| IPI00384140  | ESR2        | 10.6                                       | 4.35E-04  | -0.551     | 3              | 8.6                | Q1      |
| IPI00300599; | CTSK        | 46.5                                       | <1.0E-304 | -0.515     | 9              | 11.7               | Q1      |
| IPI00167949; | MX1         | 18.3                                       | 7.22E-90  | -0.508     | 8              | 13.1               | Q1      |
| IPI00848334; | KIF2A       | 8.5                                        | 3.58E-39  | -0.467     | 2              | 33.7               | Q2      |
| IPI00296534; | FBLN1       | 18.2                                       | 2.50E-34  | -0.462     | 4              | 25.3               | Q2      |
| IPI00296713; | GRN         | 3.9                                        | 1.10E-14  | -0.455     | 2              | 9.9                | Q2      |
| IPI00297646; | COL1A1      | 46.7                                       | <1.0E-304 | -0.419     | 58             | 49.1               | Q2      |
| IPI00749429; | TTYH3       | 2.7                                        | 8.52E-48  | -0.406     | 2              | 8.3                | Q2      |
| IPI00026111; | TMCO1       | 12.2                                       | 1.52E-38  | -0.389     | 2              | 20.8               | Q2      |
| IPI00027780; | MMP2        | 17.7                                       | 7.88E-76  | -0.383     | 8              | 12.4               | Q2      |
| IPI00384280; | PCYOX1      | 35.4                                       | 1.98E-191 | -0.377     | 8              | 18.9               | Q2      |
| IPI00873137; | COL1A2      | 36.9                                       | <1.0E-304 | -0.370     | 38             | 24.9               | Q2      |
| IPI00100199; | CYBRD1      | 7.7                                        | 3.13E-15  | -0.361     | 3              | 14.0               | Q2      |

|              |               |      |           |        |    |      |    |
|--------------|---------------|------|-----------|--------|----|------|----|
| IPI00455473; | MIA3          | 5.6  | 3.30E-69  | -0.360 | 2  | 15.0 | Q2 |
| IPI00032292; | TIMP1         | 24.6 | 9.12E-26  | -0.321 | 4  | 17.2 | Q2 |
| IPI00871585; | BID           | 11.1 | 8.30E-51  | -0.321 | 3  | 15.3 | Q2 |
| IPI00394994; | C14orf49      | 4    | 4.51E-22  | -0.320 | 2  | 20.3 | Q2 |
| IPI00024775; | RAB7L1        | 10.8 | 1.55E-19  | -0.320 | 2  | 35.1 | Q2 |
| IPI00016621; | AP2A2         | 25   | <1.0E-304 | -0.313 | 7  | 48.8 | Q2 |
| IPI00005573; | NT5C          | 18.9 | 3.08E-23  | -0.305 | 2  | 15.6 | Q2 |
| IPI00783109; | MTSS1L        | 7.2  | 3.32E-10  | -0.296 | 2  | 3.0  | Q2 |
| IPI00913924; | LRRC15        | 25.9 | 7.68E-125 | -0.286 | 8  | 7.0  | Q2 |
| IPI00477611; | COL5A1        | 4.9  | 7.86E-32  | -0.278 | 5  | 14.0 | Q2 |
| IPI00002606; | SCIN          | 7.1  | 3.37E-12  | -0.278 | 3  | 2.5  | Q2 |
| IPI00329719; | MYO1D         | 54.9 | <1.0E-304 | -0.266 | 37 | 11.8 | Q2 |
| IPI00024642; | CCDC47        | 15.7 | 2.45E-34  | -0.265 | 2  | 0.5  | Q2 |
| IPI00639812; | MGST3         | 16.9 | 1.83E-97  | -0.262 | 2  | 1.9  | Q2 |
| IPI00103467; | ALDH1B1       | 23.8 | 6.40E-265 | -0.262 | 3  | 6.2  | Q2 |
| IPI00304577; | AP2A1         | 48.8 | <1.0E-304 | -0.262 | 34 | 34.0 | Q2 |
| IPI00171412; | SUMF2         | 22.5 | 6.80E-82  | -0.261 | 4  | 9.0  | Q2 |
| IPI00007675; | DYNC1LI1      | 14.3 | 9.42E-74  | -0.260 | 3  | 21.1 | Q2 |
| IPI00643567  | CAP1          | 18.2 | <1.0E-304 | -0.260 | 3  | 15.3 | Q2 |
| IPI00640525; | PPGB          | 19.1 | 1.54E-91  | -0.256 | 4  | 7.4  | Q2 |
| IPI00303602; | AIDA          | 11.4 | 5.65E-10  | -0.252 | 2  | 18.1 | Q2 |
| IPI00900260; | ARHGEF7       | 12   | 1.95E-91  | -0.252 | 2  | 18.2 | Q2 |
| IPI00247063; | MME           | 54.7 | <1.0E-304 | -0.248 | 33 | 8.9  | Q2 |
| IPI00018953; | DPP4          | 41.9 | <1.0E-304 | -0.247 | 28 | 16.6 | Q2 |
| IPI00152695; | WDR82         | 17.3 | 1.06E-41  | -0.245 | 2  | 20.5 | Q2 |
| IPI00303195; | SYNC          | 6.8  | 1.31E-25  | -0.244 | 2  | 37.0 | Q2 |
| IPI00291136  | COL6A1        | 40.1 | <1.0E-304 | -0.238 | 28 | 6.3  | Q2 |
| IPI00908768; | HSPB6         | 43.9 | 1.67E-76  | -0.238 | 3  | 5.5  | Q2 |
| IPI00009896; | EPHX1         | 28.6 | 5.26E-56  | -0.236 | 8  | 14.9 | Q2 |
| IPI00000230; | DKFZp586K2222 | 48.9 | 3.25E-272 | -0.236 | 11 | 17.6 | Q2 |
| IPI00182728; | VPS4B         | 16   | 1.67E-47  | -0.234 | 3  | 15.2 | Q2 |
| IPI00465428; | VPS13C        | 4.6  | 7.09E-49  | -0.234 | 8  | 8.4  | Q2 |
| IPI00887461; | HLA-B         | 29.3 | 3.54E-170 | -0.232 | 6  | 7.1  | Q2 |

|              |         |      |           |        |     |      |    |
|--------------|---------|------|-----------|--------|-----|------|----|
| IPI00003766  | ETHE1   | 36.2 | 2.02E-67  | -0.231 | 4   | 19.3 | Q2 |
| IPI00292894  | TSR1    | 3.6  | 1.16E-03  | -0.230 | 2   | 40.6 | Q2 |
| IPI00295595; | CERCAM  | 7.1  | 3.24E-28  | -0.229 | 2   | 1.8  | Q2 |
| IPI00028564; | GBP1    | 23.1 | 9.18E-48  | -0.229 | 9   | 24.0 | Q2 |
| IPI00018352; | UCHL1   | 53.8 | 4.30E-202 | -0.229 | 19  | 4.3  | Q2 |
| IPI00288947; | GNAQ    | 19.2 | 1.05E-82  | -0.225 | 2   | 0.5  | Q2 |
| IPI00021057; | SLC12A4 | 7.9  | 8.01E-12  | -0.225 | 5   | 26.9 | Q2 |
| IPI00095891; | GNAS    | 8.5  | 3.95E-32  | -0.223 | 3   | 5.2  | Q2 |
| IPI00790064; | NDUFB9  | 19   | 4.45E-53  | -0.219 | 2   | 23.0 | Q2 |
| IPI00796919; | GLB1    | 22.5 | 3.73E-190 | -0.217 | 6   | 8.6  | Q2 |
| IPI00012119; | DCN     | 21.4 | 1.22E-40  | -0.214 | 3   | 8.2  | Q2 |
| IPI00295741; | CTSB    | 46.9 | <1.0E-304 | -0.213 | 17  | 19.4 | Q2 |
| IPI00028565; | GBP2    | 6.9  | 1.45E-09  | -0.210 | 2   | 3.5  | Q2 |
| IPI00296485  | MAP1S   | 5.6  | 1.31E-17  | -0.208 | 2   | 21.0 | Q2 |
| IPI00014572  | SPARC   | 26.1 | 9.58E-69  | -0.207 | 5   | 42.2 | Q2 |
| IPI00031479; | PDIA5   | 14.1 | 2.50E-18  | -0.206 | 3   | 11.3 | Q2 |
| IPI00156689; | VAT1    | 61.3 | <1.0E-304 | -0.205 | 32  | 7.9  | Q2 |
| IPI00220278; | MYL9    | 46.5 | <1.0E-304 | -0.202 | 5   | 3.3  | Q2 |
| IPI00745313; | AEBP1   | 9.3  | 2.77E-63  | -0.200 | 6   | 4.0  | Q2 |
| IPI00016373; | RAB13   | 21.2 | 1.21E-35  | -0.200 | 2   | 1.9  | Q2 |
| IPI00014533; | UBTF    | 8    | 6.16E-19  | -0.200 | 3   | 17.4 | Q2 |
| IPI00290279; | ADK     | 27.1 | 6.67E-75  | -0.200 | 5   | 19.8 | Q2 |
| IPI00002824; | CSRP2   | 61.7 | 7.58E-69  | -0.200 | 6   | 4.4  | Q2 |
| IPI00554521; | FTH1    | 44.3 | 3.51E-51  | -0.198 | 7   | 40.0 | Q2 |
| IPI00029111; | LCRMP   | 44   | <1.0E-304 | -0.198 | 11  | 9.8  | Q2 |
| IPI00299066; | LPXN    | 22   | 2.03E-151 | -0.193 | 3   | 0.5  | Q2 |
| IPI00009946; | TOMM34  | 18.8 | 6.18E-17  | -0.192 | 3   | 18.7 | Q2 |
| IPI00797603; | PRPSAP1 | 15.1 | 6.69E-37  | -0.192 | 3   | 21.6 | Q2 |
| IPI00011229; | CTSD    | 48.3 | <1.0E-304 | -0.192 | 33  | 15.3 | Q2 |
| IPI00022200; | COL6A3  | 54.5 | <1.0E-304 | -0.191 | 355 | 18.9 | Q2 |
| IPI00293088; | GAA     | 24.5 | <1.0E-304 | -0.190 | 4   | 22.2 | Q2 |
| IPI00009236; | CAV1    | 50   | 6.46E-153 | -0.190 | 19  | 6.3  | Q2 |
| IPI00291238; | FBLIM1  | 22.3 | 6.70E-51  | -0.190 | 3   | 10.5 | Q2 |

|              |          |      |           |        |     |      |    |
|--------------|----------|------|-----------|--------|-----|------|----|
| IPI00375631  | ISG15    | 13.3 | 1.45E-05  | -0.187 | 2   | 33.3 | Q2 |
| IPI00058192; | POFUT1   | 9.3  | 7.10E-38  | -0.186 | 3   | 11.4 | Q2 |
| IPI00873226; | hTGP     | 1.3  | 2.86E-03  | -0.186 | 2   | 14.5 | Q2 |
| IPI00375676; | FTL      | 35.6 | 1.27E-122 | -0.186 | 5   | 9.4  | Q2 |
| IPI00011932  | HSPA12A  | 9.5  | 2.46E-30  | -0.184 | 2   | 1.2  | Q2 |
| IPI00022745; | MVD      | 8.5  | 2.11E-34  | -0.183 | 2   | 23.4 | Q2 |
| IPI00018769; | THBS2    | 10.4 | 1.34E-122 | -0.183 | 7   | 10.6 | Q2 |
| IPI00298111; | SNX6     | 31.1 | 6.07E-81  | -0.182 | 6   | 15.4 | Q2 |
| IPI00328113; | FBN1     | 2    | 1.00E-21  | -0.179 | 3   | 36.3 | Q2 |
| IPI00470529; | GPNMB    | 5.8  | 9.65E-109 | -0.179 | 14  | 11.4 | Q2 |
| IPI00026314; | GSN      | 51.3 | <1.0E-304 | -0.178 | 42  | 9.2  | Q2 |
| IPI00166955; | CNPY4    | 6.2  | 3.49E-97  | -0.177 | 2   | 2.7  | Q2 |
| IPI00871680; | ARFGAP2  | 14   | 1.55E-136 | -0.177 | 2   | 18.9 | Q2 |
| IPI00332106; | PBXIP1   | 21.9 | 1.86E-146 | -0.177 | 6   | 8.5  | Q2 |
| IPI00743696; | COL4A1   | 4    | 1.82E-08  | -0.177 | 2   | 13.1 | Q2 |
| IPI00021264  | CNN1     | 42.4 | 1.67E-126 | -0.177 | 4   | 3.9  | Q2 |
| IPI00856045; | AHNAK2   | 41.1 | <1.0E-304 | -0.177 | 107 | 15.0 | Q2 |
| IPI00023510; | RAB5A    | 35.3 | 1.11E-94  | -0.177 | 8   | 14.5 | Q2 |
| IPI00056334; | PRKCDBP  | 50.2 | 7.35E-130 | -0.177 | 9   | 9.6  | Q2 |
| IPI00025318; | SH3BGRL  | 56.1 | 5.58E-74  | -0.176 | 5   | 7.9  | Q2 |
| IPI00296157; | RETSAT   | 8.2  | 1.73E-26  | -0.176 | 2   | 8.8  | Q2 |
| IPI00884192; | GPX4     | 33.8 | 9.09E-63  | -0.173 | 4   | 4.5  | Q2 |
| IPI00028122; | PSIP1    | 8.7  | 9.10E-63  | -0.173 | 4   | 12.7 | Q2 |
| IPI00060627  | CCDC124  | 25.1 | 1.83E-09  | -0.173 | 2   | 1.3  | Q2 |
| IPI00385495; | LMF2     | 11.2 | 1.33E-72  | -0.172 | 8   | 20.1 | Q2 |
| IPI00100673; | VPS24    | 20.3 | 2.34E-07  | -0.171 | 2   | 1.9  | Q2 |
| IPI00004312; | STAT2    | 29.5 | 3.44E-227 | -0.171 | 22  | 23.9 | Q2 |
| IPI00168878  | TOR1AIP2 | 9.8  | 6.53E-23  | -0.171 | 3   | 3.7  | Q2 |
| IPI00797038; | PCK2     | 31.2 | 3.47E-231 | -0.170 | 9   | 9.5  | Q2 |
| IPI00018248; | KDEL2    | 8    | 9.59E-36  | -0.170 | 6   | 12.2 | Q2 |
| IPI00329696; | FAM82B   | 24.2 | 3.48E-23  | -0.170 | 4   | 20.4 | Q2 |
| IPI00007084  | SLC25A13 | 23.1 | 6.33E-230 | -0.170 | 5   | 13.4 | Q2 |
| IPI00003128; | P4HA2    | 45.6 | <1.0E-304 | -0.169 | 4   | 2.1  | Q2 |

|              |          |      |           |        |     |      |    |
|--------------|----------|------|-----------|--------|-----|------|----|
| IPI00014264; | ACAP2    | 11.4 | 7.76E-80  | -0.166 | 2   | 16.2 | Q2 |
| IPI00301518; | MOBK1B   | 17.1 | 1.13E-08  | -0.165 | 3   | 16.1 | Q2 |
| IPI00873452; | LMCD1    | 40.1 | 2.97E-139 | -0.163 | 7   | 5.5  | Q2 |
| IPI00013981; | YES1     | 6.8  | 5.67E-18  | -0.163 | 3   | 8.0  | Q2 |
| IPI00022348; | PML      | 11.7 | 1.54E-20  | -0.162 | 7   | 26.3 | Q2 |
| IPI00014624  | AP3S1    | 18.1 | 5.97E-40  | -0.162 | 2   | 5.3  | Q2 |
| IPI00306322; | COL4A2   | 2    | 1.71E-16  | -0.160 | 3   | 7.7  | Q2 |
| IPI00100656; | GPSN2    | 24.4 | 1.03E-22  | -0.159 | 5   | 99.9 | Q2 |
| IPI00927606; | GPX1     | 42.4 | 4.82E-108 | -0.159 | 7   | 6.3  | Q2 |
| IPI00008787; | NAGLU    | 26.8 | 9.07E-267 | -0.158 | 5   | 17.7 | Q2 |
| IPI00420108; | DLST     | 24.3 | 1.29E-128 | -0.158 | 12  | 26.2 | Q2 |
| IPI00217465; | HIST1H1C | 27.7 | 9.11E-73  | -0.157 | 16  | 40.0 | Q2 |
| IPI00871988; | SFXN3    | 47.7 | 4.61E-183 | -0.156 | 7   | 10.8 | Q2 |
| IPI00012585  | HEXB     | 36   | 6.45E-127 | -0.156 | 17  | 14.5 | Q2 |
| IPI00872808; | DOCK1    | 6.3  | 2.33E-24  | -0.156 | 6   | 6.6  | Q2 |
| IPI00220739; | PGRMC1   | 40.5 | 1.36E-134 | -0.154 | 10  | 7.6  | Q2 |
| IPI00257882; | PEPD     | 31.8 | 5.52E-238 | -0.153 | 9   | 6.7  | Q2 |
| IPI00293590; | MGLL     | 11.2 | 5.04E-134 | -0.153 | 3   | 2.5  | Q2 |
| IPI00176903; | PTRF     | 48.5 | <1.0E-304 | -0.152 | 24  | 6.5  | Q2 |
| IPI00291412; | PPM1F    | 14.3 | 8.79E-28  | -0.152 | 2   | 3.3  | Q2 |
| IPI00872668; | NIT2     | 36   | 7.58E-105 | -0.151 | 3   | 12.2 | Q2 |
| IPI00237884; | AKAP12   | 33.7 | <1.0E-304 | -0.150 | 27  | 8.6  | Q2 |
| IPI00063827; | ABHD14B  | 27.1 | 3.45E-17  | -0.150 | 6   | 7.3  | Q2 |
| IPI00020557; | LRP1     | 25.7 | <1.0E-304 | -0.149 | 177 | 10.4 | Q2 |
| IPI00337541  | NNT      | 29   | <1.0E-304 | -0.148 | 29  | 57.9 | Q2 |
| IPI00026848  | LRPAP1   | 31.4 | 9.84E-33  | -0.146 | 3   | 6.6  | Q2 |
| IPI00607799; | BDH2     | 36.3 | 4.94E-94  | -0.146 | 2   | 1.0  | Q2 |
| IPI00012102; | GNS      | 38.2 | 6.25E-250 | -0.146 | 14  | 10.2 | Q2 |
| IPI00654777; | EIF3F    | 37.6 | 4.58E-282 | -0.146 | 14  | 32.4 | Q2 |
| IPI00001437; | RND3     | 20.9 | 2.43E-17  | -0.144 | 2   | 0.0  | Q2 |
| IPI00009950  | LMAN2    | 41   | 1.13E-193 | -0.144 | 4   | 85.6 | Q2 |
| IPI00465436  | CAT      | 27.1 | 1.67E-193 | -0.143 | 3   | 15.9 | Q2 |
| IPI00031627  | POLR2A   | 5.1  | 4.16E-25  | -0.140 | 2   | 16.6 | Q2 |

|              |         |      |           |        |    |      |    |
|--------------|---------|------|-----------|--------|----|------|----|
| IPI00218922; | SEC63   | 16.3 | 1.54E-54  | -0.140 | 6  | 9.5  | Q2 |
| IPI00001568; | ATP6V1D | 32.4 | 6.48E-70  | -0.139 | 4  | 17.4 | Q2 |
| IPI00025717; | MTX2    | 22.8 | 3.72E-33  | -0.139 | 2  | 2.0  | Q2 |
| IPI00006167; | PPM1G   | 13   | 1.19E-19  | -0.138 | 8  | 17.7 | Q2 |
| IPI00217519; | RALA    | 14.1 | 1.42E-84  | -0.137 | 2  | 8.2  | Q2 |
| IPI00001564  | CDKN2C  | 19   | 4.72E-03  | -0.137 | 2  | 5.7  | Q2 |
| IPI00884105; | LAMP1   | 15.3 | 1.02E-163 | -0.137 | 15 | 7.6  | Q2 |
| IPI00410666; | SCRIB   | 4.2  | 1.12E-09  | -0.136 | 2  | 19.2 | Q2 |
| IPI00294158; | BLVRA   | 39.9 | 5.22E-62  | -0.136 | 6  | 8.9  | Q2 |
| IPI00440703; | GSTK1   | 39.7 | 1.16E-177 | -0.134 | 10 | 11.8 | Q2 |
| IPI00021389  | CCS     | 20.4 | 5.93E-31  | -0.134 | 3  | 3.8  | Q2 |
| IPI00029744; | SSBP1   | 57.4 | 1.79E-170 | -0.134 | 4  | 3.3  | Q2 |
| IPI00783313; | PYGL    | 38.6 | 3.49E-260 | -0.134 | 16 | 8.9  | Q2 |
| IPI00017256; | RSU1    | 55.2 | 2.61E-147 | -0.132 | 12 | 8.2  | Q2 |
| IPI00012535; | DNAJA1  | 23.7 | 1.96E-40  | -0.132 | 4  | 11.2 | Q2 |
| IPI00001883; | SNX9    | 32.8 | 5.34E-241 | -0.132 | 8  | 13.2 | Q2 |
| IPI00657752; | CD81    | 21.5 | 8.60E-141 | -0.131 | 6  | 5.5  | Q2 |
| IPI00006987; | DDX24   | 6.4  | 1.11E-07  | -0.131 | 2  | 8.0  | Q2 |
| IPI00021327; | GRB2    | 27.2 | 2.45E-12  | -0.131 | 4  | 15.8 | Q2 |
| IPI00009507; | SYPL1   | 8.5  | 1.05E-20  | -0.130 | 2  | 5.7  | Q2 |
| IPI00219301  | MARCKS  | 36.1 | 9.40E-250 | -0.129 | 4  | 5.7  | Q2 |
| IPI00024915; | PRDX5   | 56.1 | 1.39E-294 | -0.129 | 10 | 8.9  | Q2 |
| IPI00002236; | MFGE8   | 26.1 | 8.16E-126 | -0.129 | 11 | 13.8 | Q2 |
| IPI00031556; | U2AF2   | 29.7 | 1.38E-212 | -0.128 | 2  | 25.1 | Q2 |
| IPI00010740; | SFPQ    | 35.8 | <1.0E-304 | -0.127 | 31 | 47.7 | Q2 |
| IPI00021728; | EIF2S2  | 30.6 | 1.10E-134 | -0.127 | 7  | 26.5 | Q2 |
| IPI00007926; | RCL     | 13.8 | 1.34E-44  | -0.126 | 2  | 2.0  | Q2 |
| IPI00007052  | FIS1    | 34.2 | 2.49E-160 | -0.126 | 3  | 4.8  | Q2 |
| IPI00216088; | CRABP2  | 56.5 | 8.13E-54  | -0.125 | 10 | 27.5 | Q2 |
| IPI00289876; | STX7    | 34.9 | 6.15E-96  | -0.125 | 3  | 3.5  | Q2 |
| IPI00169285  | PLBD2   | 19.5 | 1.41E-49  | -0.125 | 3  | 1.0  | Q2 |
| IPI00376259; | SRGAP1  | 3.5  | 2.12E-66  | -0.125 | 2  | 22.1 | Q2 |
| IPI00158615; | THOC2   | 2.5  | 2.94E-14  | -0.124 | 3  | 17.8 | Q2 |

|              |          |      |           |        |    |      |    |
|--------------|----------|------|-----------|--------|----|------|----|
| IPI00915356; | CPSF7    | 10.9 | 5.66E-99  | -0.122 | 3  | 3.6  | Q2 |
| IPI00006608; | APP      | 5.8  | 2.65E-09  | -0.122 | 3  | 5.3  | Q2 |
| IPI00301280; | TMEM43   | 41.2 | 5.95E-142 | -0.122 | 4  | 8.5  | Q2 |
| IPI00022810; | CTSC     | 3.9  | 2.05E-08  | -0.121 | 2  | 8.5  | Q2 |
| IPI00554788; | KRT18    | 37.4 | 1.89E-139 | -0.120 | 15 | 13.3 | Q2 |
| IPI00295542; | NUCB1    | 21.9 | 8.75E-118 | -0.118 | 5  | 6.3  | Q2 |
| IPI00023987; | PPCS     | 24.1 | 6.44E-34  | -0.118 | 2  | 3.6  | Q2 |
| IPI00008167; | ATP1B3   | 21.1 | 1.03E-61  | -0.118 | 4  | 7.1  | Q2 |
| IPI00012728; | ACSL1    | 19.8 | 6.29E-126 | -0.117 | 3  | 8.5  | Q2 |
| IPI00294834; | ASPH     | 39.4 | <1.0E-304 | -0.117 | 43 | 7.3  | Q2 |
| IPI00022020  | INPP4B   | 1.4  | 2.43E-19  | -0.117 | 3  | 5.4  | Q2 |
| IPI00296147; | TMEM119  | 12.4 | 4.08E-39  | -0.117 | 3  | 4.1  | Q2 |
| IPI00306380; | GNL3     | 10.4 | 9.00E-08  | -0.117 | 3  | 9.0  | Q2 |
| IPI00419847; | SORBS3   | 8.9  | 2.11E-37  | -0.117 | 3  | 9.6  | Q2 |
| IPI00604647; | MAP4K4   | 9.8  | 2.45E-21  | -0.117 | 5  | 14.4 | Q2 |
| IPI00220906; | ACOT2    | 23   | 9.13E-191 | -0.117 | 6  | 7.7  | Q2 |
| IPI00299719; | TCIRG1   | 15.9 | 3.59E-40  | -0.117 | 6  | 14.1 | Q2 |
| IPI00299086; | SDCBP    | 65.1 | <1.0E-304 | -0.115 | 22 | 9.6  | Q2 |
| IPI00298406; | HADH     | 26.2 | 2.02E-132 | -0.114 | 5  | 11.4 | Q2 |
| IPI00009885; | FKBP11   | 23.4 | 1.09E-69  | -0.114 | 2  | 6.3  | Q2 |
| IPI00479877; | ALDH9A1  | 31.7 | 1.22E-154 | -0.114 | 10 | 9.3  | Q2 |
| IPI00013933; | DSP      | 13.7 | 7.13E-184 | -0.113 | 28 | 54.4 | Q2 |
| IPI00218693; | APRT     | 57.2 | 1.22E-65  | -0.113 | 7  | 14.3 | Q2 |
| IPI00550523; | ATL3     | 29.8 | 8.33E-121 | -0.113 | 6  | 17.8 | Q2 |
| IPI00298731  | PPP1R10  | 3.8  | 2.94E-12  | -0.112 | 2  | 4.3  | Q2 |
| IPI00550733; | TBC1D2B  | 5.6  | 5.78E-05  | -0.112 | 3  | 1.9  | Q2 |
| IPI00007426; | ARL6IP5  | 28.2 | 1.36E-60  | -0.112 | 17 | 18.7 | Q2 |
| IPI00030131; | TMPO     | 34.8 | 1.30E-130 | -0.111 | 7  | 15.1 | Q2 |
| IPI00218728; | PAFAH1B1 | 23.4 | 5.75E-76  | -0.111 | 2  | 1.7  | Q2 |
| IPI00328911; | HECTD1   | 2    | 3.71E-07  | -0.111 | 3  | 23.3 | Q2 |
| IPI00291939; | SMC1A    | 14.7 | 2.75E-85  | -0.110 | 5  | 10.1 | Q2 |
| IPI00253036; | CD99     | 13   | 2.98E-05  | -0.110 | 3  | 3.1  | Q2 |
| IPI00012545; | TGOLN2   | 8.3  | 2.44E-23  | -0.109 | 2  | 11.6 | Q2 |

|              |          |      |           |        |    |      |    |
|--------------|----------|------|-----------|--------|----|------|----|
| IPI00902614; | USP24    | 2.6  | 9.81E-17  | -0.109 | 2  | 4.3  | Q2 |
| IPI00032459; | AP3M1    | 20.3 | 2.84E-118 | -0.108 | 2  | 1.5  | Q2 |
| IPI00554705; | DCTD     | 39.2 | 2.03E-81  | -0.108 | 4  | 8.6  | Q2 |
| IPI00376344; | MYO1B    | 24.6 | 1.52E-266 | -0.108 | 21 | 11.5 | Q2 |
| IPI00219684; | FABP3    | 80.5 | 8.04E-83  | -0.108 | 7  | 26.5 | Q2 |
| IPI00743931; | GORASP2  | 9.5  | 1.77E-36  | -0.107 | 2  | 13.5 | Q2 |
| IPI00100980; | EHD2     | 79.4 | <1.0E-304 | -0.107 | 34 | 7.0  | Q2 |
| IPI00383849; | PLCG1    | 5.7  | 9.98E-23  | -0.107 | 2  | 3.6  | Q2 |
| IPI00014197; | CDV3     | 28.7 | 2.40E-97  | -0.106 | 2  | 11.3 | Q2 |
| IPI00166865  | CISD2    | 46.7 | 1.20E-55  | -0.105 | 4  | 8.1  | Q2 |
| IPI00873410; | CNN3     | 38.4 | <1.0E-304 | -0.105 | 11 | 12.1 | Q2 |
| IPI00010418; | MYO1C    | 0.8  | <1.0E-304 | -0.104 | 2  | 11.6 | Q2 |
| IPI00019450; | TROVE2   | 24.3 | 6.10E-92  | -0.103 | 5  | 2.7  | Q2 |
| IPI00018195; | MAPK3    | 24.5 | 1.40E-119 | -0.103 | 3  | 9.3  | Q2 |
| IPI00009305; | GNPDA1   | 57.1 | 1.91E-170 | -0.103 | 13 | 49.9 | Q2 |
| IPI00027341; | CAPG     | 44.5 | 7.58E-151 | -0.102 | 6  | 4.8  | Q2 |
| IPI00382843; | PRNP     | 7    | 1.46E-15  | -0.102 | 2  | 1.1  | Q2 |
| IPI00014312; | CUL3     | 24.2 | 2.19E-118 | -0.102 | 7  | 5.1  | Q2 |
| IPI00444945; | BAX      | 43.6 | 6.31E-144 | -0.101 | 8  | 9.0  | Q2 |
| IPI00024097; | TES      | 17.6 | 6.72E-32  | -0.101 | 3  | 11.1 | Q2 |
| IPI00217056; | LEPREL2  | 27.4 | 6.20E-216 | -0.101 | 9  | 8.1  | Q2 |
| IPI00007812; | ATP6V1B2 | 53.6 | <1.0E-304 | -0.099 | 15 | 8.6  | Q2 |
| IPI00218924; | CHP      | 20   | 2.48E-45  | -0.098 | 3  | 2.3  | Q2 |
| IPI00025160; | VAC14    | 25.6 | 2.08E-129 | -0.098 | 6  | 9.9  | Q2 |
| IPI00216298; | TXN      | 31.4 | 1.44E-31  | -0.098 | 2  | 19.2 | Q2 |
| IPI00001580; | FYCO1    | 35.6 | <1.0E-304 | -0.098 | 15 | 10.3 | Q2 |
| IPI00032140; | SERPINH1 | 59.8 | <1.0E-304 | -0.097 | 54 | 21.9 | Q2 |
| IPI00217018; | SAMD9    | 1.3  | 1.70E-13  | -0.097 | 2  | 9.7  | Q2 |
| IPI00741097; | GSTT1    | 22.1 | 1.14E-06  | -0.097 | 2  | 11.2 | Q2 |
| IPI00792788; | DOCK5    | 4.8  | 5.33E-43  | -0.097 | 5  | 11.4 | Q2 |
| IPI00216138; | TAGLN    | 87.1 | <1.0E-304 | -0.097 | 59 | 11.5 | Q2 |
| IPI00028481; | RAB8A    | 25.1 | 2.62E-77  | -0.097 | 6  | 8.9  | Q2 |
| IPI00413160; | TRIOBP   | 5.1  | 2.55E-88  | -0.097 | 3  | 9.6  | Q2 |



|              |          |      |           |        |    |      |    |
|--------------|----------|------|-----------|--------|----|------|----|
| IPI00790503; | MYH10    | 45.9 | <1.0E-304 | -0.097 | 74 | 11.6 | Q2 |
| IPI00016862; | GSR      | 10.3 | 1.32E-25  | -0.097 | 3  | 4.6  | Q2 |
| IPI00456887; | HNRNPUL2 | 34.7 | <1.0E-304 | -0.096 | 18 | 12.9 | Q2 |
| IPI00072377; | SET      | 19.3 | 5.06E-100 | -0.096 | 7  | 5.8  | Q2 |
| IPI00003438  | DNAJC8   | 28.9 | 9.40E-29  | -0.096 | 4  | 6.6  | Q2 |
| IPI00298289; | RTN4     | 43.4 | 3.49E-192 | -0.096 | 28 | 28.1 | Q2 |
| IPI00412492; | PLXND1   | 2.3  | 1.21E-14  | -0.095 | 3  | 6.7  | Q2 |
| IPI00027505; | ITGAV    | 30.5 | 1.40E-301 | -0.095 | 27 | 12.3 | Q2 |
| IPI00069817; | BAZ1B    | 2.5  | 1.94E-34  | -0.094 | 2  | 16.5 | Q2 |
| IPI00019912; | HSD17B4  | 55.2 | <1.0E-304 | -0.094 | 34 | 7.5  | Q2 |
| IPI00008034  | RAB23    | 38.4 | 2.20E-128 | -0.093 | 4  | 4.0  | Q2 |
| IPI00645962; | TAPBP    | 5.4  | 4.13E-02  | -0.093 | 3  | 1.7  | Q2 |
| IPI00030781; | STAT1    | 50.8 | <1.0E-304 | -0.093 | 33 | 9.6  | Q2 |
| IPI00217766; | SCARB2   | 33.5 | 4.43E-111 | -0.093 | 10 | 9.5  | Q2 |
| IPI00003925; | PDHB     | 42.1 | 3.21E-225 | -0.092 | 9  | 11.0 | Q2 |
| IPI00028387; | DDRGK1   | 20.1 | 5.95E-105 | -0.092 | 2  | 25.4 | Q2 |
| IPI00018274; | EGFR     | 18.5 | 1.38E-94  | -0.092 | 13 | 10.2 | Q2 |
| IPI00012345; | SFRS6    | 18.3 | 8.42E-09  | -0.092 | 7  | 17.4 | Q2 |
| IPI00107752; | OPA1     | 11.4 | 5.18E-50  | -0.092 | 2  | 9.5  | Q2 |
| IPI00008454; | DNAJB11  | 7.8  | 5.55E-115 | -0.092 | 2  | 9.3  | Q2 |
| IPI00219129; | NQO2     | 36.4 | 7.75E-69  | -0.092 | 4  | 6.7  | Q2 |
| IPI00018963; | PARVA    | 25.8 | 2.33E-243 | -0.091 | 4  | 6.0  | Q2 |
| IPI00013466; | ASNA1    | 33.3 | 1.51E-160 | -0.091 | 7  | 6.1  | Q2 |
| IPI00012303; | SELENBP1 | 25.5 | 2.44E-110 | -0.091 | 2  | 6.9  | Q2 |
| IPI00025039; | FBL      | 29.9 | 1.66E-22  | -0.090 | 5  | 7.9  | Q2 |
| IPI00182126; | FKBP9    | 32.8 | 3.02E-169 | -0.089 | 8  | 13.5 | Q2 |
| IPI00220158; | ADD1     | 28.3 | 4.90E-174 | -0.089 | 10 | 14.6 | Q2 |
| IPI00093057  | CPOX     | 7.3  | 1.81E-21  | -0.088 | 2  | 1.1  | Q2 |
| IPI00450472; | UBE2I    | 33.7 | 8.00E-28  | -0.088 | 4  | 4.0  | Q2 |
| IPI00103940  | MFS10    | 6.6  | 8.50E-22  | -0.088 | 5  | 49.8 | Q2 |
| IPI00016801; | GLUD1    | 47   | 2.32E-290 | -0.088 | 14 | 7.6  | Q2 |
| IPI00021807; | GBA      | 30.4 | 4.20E-201 | -0.088 | 10 | 8.2  | Q2 |
| IPI00479306; | PSMB5    | 46   | 1.16E-123 | -0.087 | 8  | 29.2 | Q2 |

|              |                |      |           |        |    |      |    |
|--------------|----------------|------|-----------|--------|----|------|----|
| IPI00023122; | PDLIM7         | 31.1 | 8.05E-79  | -0.086 | 16 | 21.1 | Q2 |
| IPI00183603; | OSTC           | 14.1 | 2.47E-20  | -0.086 | 4  | 90.9 | Q2 |
| IPI00216965; | GOSR2          | 13.1 | 4.52E-10  | -0.086 | 3  | 7.1  | Q2 |
| IPI00020956; | HDGF           | 23.3 | 6.80E-56  | -0.086 | 3  | 2.3  | Q2 |
| IPI00292771; | NUMA1          | 31.3 | <1.0E-304 | -0.086 | 26 | 11.4 | Q2 |
| IPI00000005; | NRAS           | 44.4 | 3.44E-50  | -0.086 | 5  | 86.2 | Q2 |
| IPI00007611; | ATP5O          | 62.4 | 8.02E-236 | -0.085 | 12 | 12.9 | Q2 |
| IPI00009328  | EIF4A3         | 34.8 | 1.52E-129 | -0.085 | 8  | 6.9  | Q2 |
| IPI00414442; | CDK5RAP3       | 12.2 | 2.92E-45  | -0.085 | 3  | 5.8  | Q2 |
| IPI00033025; | SEPT7          | 35.6 | <1.0E-304 | -0.085 | 6  | 10.8 | Q2 |
| IPI00013976; | LAMB1          | 14.3 | 1.06E-183 | -0.084 | 15 | 12.8 | Q2 |
| IPI00027096; | MRPL19         | 11.3 | 1.20E-04  | -0.084 | 2  | 6.5  | Q2 |
| IPI00019383; | GALK1          | 14.7 | 1.36E-27  | -0.084 | 3  | 4.0  | Q2 |
| IPI00025796  | NDUFS3         | 43.6 | 6.12E-182 | -0.084 | 10 | 11.1 | Q2 |
| IPI00019376; | SEPT11         | 39.9 | 1.12E-202 | -0.084 | 7  | 4.8  | Q2 |
| IPI00290110; | PDCD4          | 7.9  | 1.28E-16  | -0.084 | 2  | 3.5  | Q2 |
| IPI00143753; | SR140          | 7.4  | 2.36E-105 | -0.083 | 6  | 11.3 | Q2 |
| IPI00793199; | ANXA4          | 61.1 | <1.0E-304 | -0.083 | 18 | 8.9  | Q2 |
| IPI00020418  | RRAS           | 44.5 | 1.50E-183 | -0.083 | 8  | 6.5  | Q2 |
| IPI00219034  | NDUFA8         | 43.6 | 1.34E-83  | -0.083 | 4  | 12.0 | Q2 |
| IPI00001914; | FKBP7          | 22.8 | 1.98E-49  | -0.083 | 4  | 10.5 | Q2 |
| IPI00742968; | HLA-A          | 55.9 | <1.0E-304 | -0.082 | 16 | 11.1 | Q2 |
| IPI00291215; | PARP14         | 4.4  | 8.85E-38  | -0.082 | 2  | 2.3  | Q2 |
| IPI00299977; | PHPT1          | 63.2 | 2.07E-125 | -0.081 | 4  | 5.3  | Q2 |
| IPI00100151; | XRN2           | 12.6 | 1.02E-93  | -0.081 | 8  | 15.4 | Q2 |
| IPI00021167; | PRKRA          | 29.7 | 2.06E-108 | -0.080 | 3  | 9.8  | Q2 |
| IPI00470649; | NCLN           | 13.3 | 2.14E-45  | -0.080 | 4  | 28.8 | Q2 |
| IPI00413451; | DKFZp686I04222 | 61.6 | <1.0E-304 | -0.079 | 12 | 5.8  | Q2 |
| IPI00010346; | NLN            | 17   | 3.43E-68  | -0.079 | 3  | 12.6 | Q2 |
| IPI00003482; | DECR1          | 33.1 | 5.60E-145 | -0.079 | 6  | 6.3  | Q2 |
| IPI00291608; | PCNP           | 11.2 | 1.02E-10  | -0.079 | 2  | 0.8  | Q2 |
| IPI00013219; | ILK            | 40.9 | 1.63E-96  | -0.078 | 12 | 8.8  | Q2 |
| IPI00299468; | SCD            | 10.3 | 4.01E-27  | -0.078 | 6  | 10.8 | Q2 |

|              |          |      |           |        |     |      |    |
|--------------|----------|------|-----------|--------|-----|------|----|
| IPI00220487; | ATP5H    | 63.4 | 1.88E-114 | -0.078 | 8   | 4.6  | Q2 |
| IPI00019463; | EIF2AK2  | 19.6 | 1.48E-117 | -0.078 | 4   | 7.3  | Q2 |
| IPI00011631  | ZW10     | 12.3 | 4.82E-101 | -0.077 | 3   | 9.7  | Q2 |
| IPI00472939; | SPCS2    | 45.8 | 1.49E-118 | -0.077 | 15  | 35.1 | Q2 |
| IPI00026182; | CAPZA2   | 32.2 | 2.28E-89  | -0.077 | 4   | 7.3  | Q2 |
| IPI00024913; | C21orf33 | 31   | 1.35E-40  | -0.076 | 2   | 2.3  | Q2 |
| IPI00382452; | CHMP1A   | 21.4 | 5.10E-05  | -0.076 | 2   | 6.7  | Q2 |
| IPI00465256; | AK3      | 54.2 | 5.87E-193 | -0.076 | 10  | 8.8  | Q2 |
| IPI00016372; | RAB9A    | 27.4 | 1.95E-61  | -0.075 | 3   | 7.1  | Q2 |
| IPI00917064; | LIMS1    | 14.9 | 3.22E-42  | -0.075 | 3   | 4.2  | Q2 |
| IPI00000760; | DDAH2    | 54.4 | <1.0E-304 | -0.075 | 8   | 8.2  | Q2 |
| IPI00654820; | MT-ATP6  | 6.8  | 1.53E-07  | -0.075 | 2   | 5.1  | Q2 |
| IPI00291093  | POLR2E   | 26.2 | 3.58E-68  | -0.074 | 3   | 9.1  | Q2 |
| IPI00303726; | IFITM3   | 49.6 | 1.32E-116 | -0.074 | 4   | 5.8  | Q2 |
| IPI00292140; | CASP3    | 11.9 | 8.72E-07  | -0.074 | 2   | 5.4  | Q2 |
| IPI00333541; | FLNA     | 72.9 | <1.0E-304 | -0.074 | 694 | 18.0 | Q2 |
| IPI00855787; | TNKS1BP1 | 26.3 | <1.0E-304 | -0.073 | 32  | 16.1 | Q2 |
| IPI00902843; | CDIPT    | 15.6 | 6.32E-26  | -0.073 | 3   | 0.9  | Q2 |
| IPI00002745; | CTSZ     | 15.8 | 1.04E-49  | -0.073 | 5   | 41.7 | Q2 |
| IPI00025849; | ANP32A   | 10.8 | 4.05E-96  | -0.072 | 2   | 2.7  | Q2 |
| IPI00001985; | VPS18    | 12.9 | 2.13E-69  | -0.072 | 7   | 18.6 | Q2 |
| IPI00015842  | RCN1     | 49.2 | 1.69E-249 | -0.072 | 4   | 9.1  | Q2 |
| IPI00171438; | TXNDC5   | 28.5 | 1.45E-159 | -0.071 | 15  | 10.8 | Q2 |
| IPI00018364  | RAP2B    | 49.7 | 2.01E-85  | -0.071 | 4   | 6.1  | Q2 |
| IPI00010157; | MAT2A    | 17.2 | 3.42E-86  | -0.071 | 7   | 34.1 | Q2 |
| IPI00303300; | FKBP10   | 37.1 | <1.0E-304 | -0.071 | 20  | 7.5  | Q2 |
| IPI00013860; | HIBADH   | 34.2 | 3.29E-190 | -0.071 | 9   | 11.4 | Q2 |
| IPI00012093; | STK25    | 1.6  | 8.49E-42  | -0.070 | 4   | 7.7  | Q2 |
| IPI00749454; | RFTN1    | 9.2  | 2.85E-87  | -0.070 | 2   | 7.8  | Q2 |
| IPI00021805; | MGST1    | 27.1 | 1.46E-48  | -0.070 | 3   | 5.0  | Q2 |
| IPI00644697; | HEBP2    | 35   | 2.06E-107 | -0.070 | 5   | 7.6  | Q2 |
| IPI00026230; | HNRNPH2  | 10.9 | 8.14E-242 | -0.070 | 2   | 12.4 | Q2 |
| IPI00003326; | ARL2     | 16.8 | 1.65E-20  | -0.070 | 2   | 14.7 | Q2 |

|              |          |      |           |        |    |      |    |
|--------------|----------|------|-----------|--------|----|------|----|
| IPI00297492; | STT3A    | 22.3 | 5.73E-127 | -0.069 | 31 | 65.0 | Q2 |
| IPI00909772; | AP2M1    | 37.4 | 2.19E-69  | -0.069 | 13 | 23.3 | Q2 |
| IPI00215998; | CD63     | 13.4 | 5.96E-16  | -0.069 | 22 | 6.8  | Q2 |
| IPI00219774; | PRKAR2A  | 39.9 | 3.27E-85  | -0.069 | 4  | 4.7  | Q2 |
| IPI00328415; | CYB5R3   | 58.4 | <1.0E-304 | -0.069 | 36 | 13.1 | Q2 |
| IPI00011268; | RALY     | 31.3 | 8.29E-52  | -0.069 | 4  | 3.8  | Q2 |
| IPI00026850; | TSPO     | 18.3 | 1.90E-39  | -0.069 | 4  | 8.1  | Q2 |
| IPI00436355; | PRKG1    | 18.4 | 2.10E-122 | -0.068 | 5  | 17.5 | Q2 |
| IPI00216008; | G6PD     | 55.3 | 9.39E-226 | -0.067 | 27 | 7.4  | Q2 |
| IPI00856116; | PALLD    | 24.4 | <1.0E-304 | -0.067 | 23 | 6.3  | Q2 |
| IPI00294911  | SDHB     | 34.3 | 1.21E-92  | -0.066 | 7  | 10.9 | Q2 |
| IPI00027078; | CPD      | 15.9 | 4.17E-107 | -0.066 | 11 | 5.7  | Q2 |
| IPI00009320; | TMEM85   | 26.8 | 2.30E-57  | -0.066 | 2  | 10.5 | Q2 |
| IPI00893918; | VARS     | 33.2 | <1.0E-304 | -0.066 | 36 | 31.5 | Q2 |
| IPI00333771; | CALD1    | 67.5 | <1.0E-304 | -0.065 | 67 | 20.8 | Q2 |
| IPI00027192; | PLOD1    | 45.3 | <1.0E-304 | -0.065 | 26 | 9.5  | Q2 |
| IPI00010810; | ETFA     | 48   | <1.0E-304 | -0.065 | 11 | 8.4  | Q2 |
| IPI00032830; | REXO2    | 31.2 | 8.48E-76  | -0.065 | 5  | 13.0 | Q2 |
| IPI00017283  | IARS2    | 27.4 | 1.11E-143 | -0.064 | 14 | 67.1 | Q2 |
| IPI00871843; | TGM2     | 48.3 | <1.0E-304 | -0.064 | 60 | 11.3 | Q2 |
| IPI00021458  | EHD3     | 11.5 | 1.23E-127 | -0.064 | 4  | 23.1 | Q2 |
| IPI00006663; | ALDH2    | 19.7 | 1.12E-149 | -0.064 | 2  | 2.9  | Q2 |
| IPI00219420; | SMC3     | 24.7 | 1.35E-122 | -0.064 | 10 | 16.4 | Q2 |
| IPI00024129; | PPIC     | 20.8 | 4.68E-31  | -0.064 | 9  | 5.5  | Q2 |
| IPI00394668; | ADAR     | 12.7 | 2.00E-69  | -0.063 | 7  | 11.7 | Q2 |
| IPI00020887; | VAMP7    | 17.3 | 4.11E-28  | -0.063 | 3  | 6.9  | Q2 |
| IPI00334190; | STOML2   | 46.1 | 4.28E-191 | -0.063 | 5  | 8.9  | Q2 |
| IPI00847322; | SOD2     | 43.2 | 2.34E-186 | -0.063 | 12 | 5.3  | Q2 |
| IPI00023704; | LPP      | 21.1 | 1.58E-134 | -0.062 | 3  | 8.8  | Q2 |
| IPI00329598  | HSD17B11 | 30.7 | 4.57E-108 | -0.062 | 6  | 10.8 | Q2 |
| IPI00412792; | BTF3L4   | 23.4 | 6.80E-26  | -0.062 | 2  | 0.8  | Q2 |
| IPI00009904; | PDIA4    | 53.3 | <1.0E-304 | -0.062 | 30 | 6.2  | Q2 |
| IPI00328319; | RBBP4    | 21.2 | 1.26E-77  | -0.061 | 8  | 23.4 | Q2 |

|              |         |      |           |        |    |      |    |
|--------------|---------|------|-----------|--------|----|------|----|
| IPI00030702; | IDH3A   | 30.1 | 2.63E-98  | -0.061 | 9  | 20.7 | Q2 |
| IPI00304267; | NXN     | 26.9 | 1.33E-117 | -0.061 | 3  | 5.8  | Q2 |
| IPI00016346; | PROSC   | 37.5 | 5.51E-75  | -0.061 | 3  | 5.6  | Q2 |
| IPI00294779; | VDAC3   | 32   | 5.16E-74  | -0.061 | 8  | 62.4 | Q2 |
| IPI00301021; | SSR1    | 11.9 | 7.66E-77  | -0.061 | 5  | 19.7 | Q2 |
| IPI00418213; | RABGEF1 | 5.8  | 4.32E-13  | -0.061 | 2  | 9.3  | Q2 |
| IPI00025366; | CS      | 39.1 | 3.20E-140 | -0.060 | 12 | 11.6 | Q2 |
| IPI00220271; | AKR1A1  | 60.3 | <1.0E-304 | -0.060 | 13 | 9.2  | Q2 |
| IPI00745613  | EXOSC4  | 8.2  | 2.67E-19  | -0.060 | 2  | 11.0 | Q2 |
| IPI00020632; | ASS1    | 21.8 | 2.16E-81  | -0.060 | 7  | 11.3 | Q2 |
| IPI00550069  | RNH1    | 70.7 | <1.0E-304 | -0.060 | 24 | 9.0  | Q2 |
| IPI00004668; | FUT8    | 5.2  | 3.74E-08  | -0.059 | 2  | 14.9 | Q2 |
| IPI00023555; | OSBPL3  | 7.3  | 2.01E-59  | -0.059 | 3  | 6.8  | Q2 |
| IPI00396593; | PDLIM2  | 17.3 | 3.69E-67  | -0.059 | 4  | 9.1  | Q2 |
| IPI00642032; | TXNL1   | 23.1 | 1.71E-113 | -0.059 | 8  | 7.9  | Q2 |
| IPI00304925; | HSPA1A  | 49.9 | <1.0E-304 | -0.059 | 24 | 9.4  | Q2 |
| IPI00910194; | NUP153  | 5    | 5.80E-18  | -0.059 | 3  | 23.3 | Q2 |
| IPI00003348; | GNB2    | 13.5 | 9.76E-211 | -0.059 | 4  | 5.5  | Q2 |
| IPI00294159; | SLC25A1 | 40.2 | 3.24E-52  | -0.059 | 11 | 6.0  | Q2 |
| IPI00009747; | LSS     | 31.1 | 1.35E-231 | -0.059 | 9  | 16.3 | Q2 |
| IPI00219344; | HPCAL1  | 22.3 | 6.95E-06  | -0.058 | 3  | 4.5  | Q2 |
| IPI00339384; | RDH11   | 20.8 | 2.24E-59  | -0.058 | 2  | 9.1  | Q2 |
| IPI00010438; | SNAP23  | 40.8 | 9.77E-72  | -0.057 | 3  | 3.7  | Q2 |
| IPI00221234; | ALDH7A1 | 41.6 | <1.0E-304 | -0.057 | 15 | 9.2  | Q2 |
| IPI00291695; | GPX8    | 52.6 | 6.69E-86  | -0.057 | 9  | 5.5  | Q2 |
| IPI00300299  | SPCS3   | 21.7 | 3.44E-35  | -0.057 | 4  | 7.2  | Q2 |
| IPI00909417  | IFI16   | 33.4 | 5.06E-218 | -0.057 | 13 | 8.8  | Q2 |
| IPI00024920  | ATP5D   | 17.3 | 1.27E-62  | -0.057 | 3  | 10.0 | Q2 |
| IPI00746777; | ADH5    | 36.9 | <1.0E-304 | -0.056 | 7  | 9.4  | Q2 |
| IPI00008215  | ME1     | 20.6 | 1.33E-99  | -0.056 | 4  | 9.9  | Q2 |
| IPI00844076; | RPN2    | 47.7 | <1.0E-304 | -0.055 | 36 | 43.5 | Q2 |
| IPI00465315; | CYCS    | 55.2 | 1.01E-55  | -0.055 | 8  | 64.6 | Q2 |
| IPI00815770; | SNX3    | 69.8 | 2.65E-64  | -0.055 | 8  | 5.0  | Q2 |

|              |          |      |           |        |     |      |    |
|--------------|----------|------|-----------|--------|-----|------|----|
| IPI00433279; | SLFN5    | 18   | 1.58E-97  | -0.055 | 3   | 7.9  | Q2 |
| IPI00059292; | MAGOHB   | 49.3 | 2.73E-25  | -0.055 | 2   | 8.1  | Q2 |
| IPI00163381; | LEPRE1   | 25.8 | 1.07E-164 | -0.055 | 13  | 6.1  | Q2 |
| IPI00604777; | DPP9     | 11.2 | 1.43E-18  | -0.054 | 2   | 25.2 | Q2 |
| IPI00215716; | EPB41L3  | 23.8 | 5.53E-268 | -0.053 | 5   | 8.6  | Q2 |
| IPI00872929; | APOBEC3C | 27.8 | 1.56E-10  | -0.053 | 4   | 5.2  | Q2 |
| IPI00554742; | API5     | 19.2 | 1.43E-104 | -0.053 | 7   | 13.8 | Q2 |
| IPI00028031; | ACADVL   | 44.2 | <1.0E-304 | -0.053 | 20  | 13.0 | Q2 |
| IPI00022892; | THY1     | 24.8 | 1.99E-103 | -0.053 | 9   | 69.4 | Q2 |
| IPI00479905; | NDUFB10  | 36.6 | 1.41E-35  | -0.053 | 2   | 1.0  | Q2 |
| IPI00003833  | MTCH2    | 48.2 | 2.08E-214 | -0.053 | 10  | 10.8 | Q2 |
| IPI00739827; | LAMP2    | 12.9 | 5.78E-35  | -0.052 | 16  | 11.2 | Q2 |
| IPI00001734; | PSAT1    | 28.9 | 1.75E-60  | -0.052 | 7   | 8.0  | Q2 |
| IPI00410067; | ZC3HAV1  | 13.4 | 7.28E-116 | -0.052 | 3   | 12.5 | Q2 |
| IPI00298267; | PTGS1    | 19.2 | 1.16E-70  | -0.052 | 5   | 5.1  | Q2 |
| IPI00021405; | LMNA     | 82.1 | <1.0E-304 | -0.052 | 107 | 13.2 | Q2 |
| IPI00004273; | RBM25    | 10.8 | 1.37E-29  | -0.052 | 4   | 4.3  | Q2 |
| IPI00796366; | MYL6     | 45   | 2.20E-247 | -0.052 | 14  | 4.0  | Q2 |
| IPI00413641; | AKR1B1   | 27.8 | 2.38E-35  | -0.052 | 4   | 4.8  | Q2 |
| IPI00893197; | PPP2R4   | 20.4 | 3.55E-69  | -0.051 | 3   | 2.8  | Q2 |
| IPI00003411  | PTGIS    | 34.4 | 8.82E-172 | -0.051 | 4   | 5.8  | Q2 |
| IPI00148063  | HEBP1    | 62.4 | 6.17E-117 | -0.051 | 5   | 5.4  | Q2 |
| IPI00016405; | OCIAD1   | 22.9 | 9.99E-43  | -0.051 | 7   | 12.3 | Q2 |
| IPI00006579; | COX4I1   | 43.2 | 4.77E-42  | -0.051 | 6   | 6.2  | Q2 |
| IPI00641990; | LAS1L    | 15.1 | 4.11E-110 | -0.050 | 2   | 18.0 | Q2 |
| IPI00871780; | RBM12B   | 2.8  | 5.95E-09  | -0.050 | 2   | 3.5  | Q2 |
| IPI00221224  | ANPEP    | 49.8 | <1.0E-304 | -0.050 | 133 | 13.3 | Q2 |
| IPI00465179; | PFKM     | 13.2 | 1.08E-179 | -0.050 | 6   | 3.6  | Q2 |
| IPI00027223; | IDH1     | 42   | 1.66E-193 | -0.050 | 17  | 9.7  | Q2 |
| IPI00293260; | DNAJC10  | 18.2 | 2.89E-147 | -0.049 | 5   | 5.7  | Q2 |
| IPI00896498; | MMP14    | 27.1 | 1.89E-192 | -0.049 | 30  | 9.2  | Q2 |
| IPI00909484; | CDC42    | 34.3 | 9.72E-120 | -0.049 | 11  | 5.7  | Q2 |
| IPI00007102; | C17orf25 | 17.1 | 2.24E-44  | -0.049 | 4   | 7.5  | Q2 |

|              |          |      |           |        |    |       |    |
|--------------|----------|------|-----------|--------|----|-------|----|
| IPI00852806; | EXOC6B   | 8.8  | 1.32E-53  | -0.049 | 2  | 3.4   | Q2 |
| IPI00927647; | POR      | 30.9 | 1.04E-244 | -0.048 | 7  | 6.1   | Q2 |
| IPI00412987; | GMFB     | 49.4 | 1.99E-202 | -0.048 | 5  | 5.9   | Q2 |
| IPI00220063  | NDUFS5   | 17.9 | 4.17E-06  | -0.048 | 2  | 10.1  | Q2 |
| IPI00026337; | RANBP3   | 8.8  | 1.52E-05  | -0.048 | 3  | 11.1  | Q2 |
| IPI00295386; | CBR1     | 75.1 | <1.0E-304 | -0.047 | 28 | 6.7   | Q2 |
| IPI00011284; | COMT     | 51.7 | 1.81E-262 | -0.047 | 9  | 8.3   | Q2 |
| IPI00003519; | EFTUD2   | 34.3 | <1.0E-304 | -0.047 | 27 | 13.6  | Q2 |
| IPI00029601; | CTTN     | 47.6 | <1.0E-304 | -0.047 | 23 | 9.9   | Q2 |
| IPI00844159  | PGM1     | 59.1 | <1.0E-304 | -0.047 | 18 | 33.0  | Q2 |
| IPI00305438; | VPS16    | 12.6 | 1.60E-146 | -0.047 | 2  | 1.1   | Q2 |
| IPI00005202  | PGRMC2   | 19.4 | 8.72E-88  | -0.047 | 6  | 4.7   | Q2 |
| IPI00479018  | SDCBP    | 5.3  | <1.0E-304 | -0.047 | 2  | 2.6   | Q2 |
| IPI00305978; | AKR7A2   | 24.8 | 1.16E-179 | -0.047 | 3  | 2.1   | Q2 |
| IPI00291646; | MTHFD1L  | 17.7 | 6.04E-133 | -0.046 | 16 | 7.9   | Q2 |
| IPI00152981; | ACAD9    | 31.2 | 7.42E-136 | -0.046 | 9  | 12.9  | Q2 |
| IPI00240812; | PDS5B    | 7.8  | 8.68E-40  | -0.045 | 2  | 7.5   | Q2 |
| IPI00005585  | TAX1BP3  | 25   | 4.94E-45  | -0.045 | 3  | 1.6   | Q2 |
| IPI00011302  | CD59     | 25   | 4.12E-32  | -0.045 | 3  | 6.8   | Q2 |
| IPI00000105; | MVP      | 70.5 | <1.0E-304 | -0.044 | 98 | 9.9   | Q2 |
| IPI00027107  | TUFM     | 49.7 | 2.29E-167 | -0.044 | 12 | 126.3 | Q2 |
| IPI00761017; | TGFB111  | 24.7 | 1.71E-203 | -0.044 | 9  | 8.6   | Q2 |
| IPI00009368  | SFXN1    | 30.1 | 3.38E-49  | -0.044 | 4  | 13.2  | Q2 |
| IPI00473014; | DSTN     | 83   | 2.66E-148 | -0.044 | 12 | 16.6  | Q2 |
| IPI00257508; | DPYSL2   | 73.6 | <1.0E-304 | -0.044 | 36 | 10.9  | Q2 |
| IPI00642378; | LASS2    | 6.2  | 1.07E-04  | -0.044 | 2  | 0.7   | Q2 |
| IPI00873253; | SEC11A   | 13.5 | 7.28E-16  | -0.043 | 2  | 6.9   | Q2 |
| IPI00009958; | COP55    | 26.9 | 7.45E-16  | -0.043 | 3  | 92.6  | Q2 |
| IPI00375531; | NME1     | 7.9  | 6.38E-99  | -0.043 | 2  | 7.4   | Q2 |
| IPI00017510  | MT-CO2   | 35.2 | 8.72E-133 | -0.043 | 9  | 85.4  | Q2 |
| IPI00029444; | C12orf10 | 14.4 | 5.32E-60  | -0.043 | 4  | 3.4   | Q2 |
| IPI00465432; | NOMO2    | 31.3 | <1.0E-304 | -0.043 | 26 | 18.3  | Q2 |
| IPI00643920; | TKT      | 55   | <1.0E-304 | -0.043 | 46 | 10.9  | Q2 |

|              |           |      |           |        |    |      |    |
|--------------|-----------|------|-----------|--------|----|------|----|
| IPI00026328  | TXNDC12   | 17.4 | 1.14E-13  | -0.043 | 3  | 5.2  | Q2 |
| IPI00151462; | MAP1LC3B2 | 22.4 | 1.57E-02  | -0.043 | 3  | 4.7  | Q2 |
| IPI00749005; | SYNE1     | 5.8  | 7.57E-114 | -0.043 | 33 | 10.0 | Q2 |
| IPI00783559  | EXOC2     | 14.9 | 3.80E-100 | -0.042 | 5  | 13.9 | Q2 |
| IPI00880164; | NAPRT1    | 12.8 | 9.29E-118 | -0.042 | 2  | 10.5 | Q2 |
| IPI00021369; | CRYAB     | 66.3 | 6.60E-146 | -0.042 | 13 | 5.2  | Q2 |
| IPI00304189; | OPTN      | 16.6 | 1.91E-58  | -0.042 | 3  | 6.8  | Q2 |
| IPI00007682  | ATP6V1A   | 57.9 | <1.0E-304 | -0.042 | 21 | 8.2  | Q2 |
| IPI00014589; | CLTB      | 25.3 | 5.39E-08  | -0.042 | 3  | 12.6 | Q2 |
| IPI00029629  | TRIM25    | 29   | 1.90E-219 | -0.042 | 8  | 6.7  | Q2 |
| IPI00219424  | SLC2A10   | 3.9  | 1.08E-02  | -0.041 | 5  | 13.3 | Q2 |
| IPI00021370; | UBE2K     | 39.5 | 5.09E-49  | -0.041 | 6  | 5.9  | Q2 |
| IPI00306604; | ITGA5     | 17.7 | 1.15E-203 | -0.041 | 14 | 9.2  | Q2 |
| IPI00024157  | FKBP3     | 38.4 | 2.43E-68  | -0.041 | 5  | 3.5  | Q2 |
| IPI00026530  | LMAN1     | 21.2 | 1.37E-55  | -0.040 | 7  | 24.1 | Q2 |
| IPI00329672; | MYO1E     | 19.6 | 1.03E-188 | -0.040 | 19 | 8.5  | Q2 |
| IPI00844172; | MYO6      | 18.3 | 3.64E-189 | -0.040 | 10 | 10.9 | Q2 |
| IPI00008223; | RAD23B    | 22.7 | 2.79E-145 | -0.040 | 9  | 11.6 | Q2 |
| IPI00646762; | NUDT5     | 53   | 1.00E-143 | -0.040 | 7  | 3.4  | Q2 |
| IPI00607861  | H6PD      | 30.2 | 1.47E-152 | -0.040 | 6  | 12.5 | Q2 |
| IPI00658023; | PTPN11    | 32.3 | 9.77E-90  | -0.039 | 3  | 7.5  | Q2 |
| IPI00220687; | HM13      | 6.8  | 2.33E-23  | -0.039 | 6  | 4.5  | Q2 |
| IPI00027851; | HEXA      | 27.8 | 8.83E-165 | -0.039 | 8  | 25.6 | Q2 |
| IPI00550682; | GRHPR     | 32.6 | 5.65E-248 | -0.039 | 5  | 3.2  | Q2 |
| IPI00054042; | GTF2I     | 10.4 | 1.42E-40  | -0.039 | 9  | 13.0 | Q2 |
| IPI00910593; | CNN2      | 60.9 | 3.68E-301 | -0.039 | 28 | 7.2  | Q2 |
| IPI00009329; | UTRN      | 25.1 | <1.0E-304 | -0.038 | 34 | 39.9 | Q2 |
| IPI00182540; | CTNND1    | 38.1 | 1.09E-300 | -0.037 | 22 | 9.8  | Q2 |
| IPI00291200; | NUP133    | 11.6 | 7.94E-129 | -0.037 | 5  | 8.2  | Q2 |
| IPI00306280; | DENR      | 23.1 | 8.91E-127 | -0.037 | 2  | 13.8 | Q2 |
| IPI00409684; | NCKAP1    | 28   | 6.31E-234 | -0.037 | 19 | 8.3  | Q2 |
| IPI00301579  | NPC2      | 33.3 | 3.20E-66  | -0.037 | 6  | 7.4  | Q2 |
| IPI00218466; | SEC61A1   | 25.3 | 1.37E-88  | -0.037 | 5  | 10.9 | Q2 |



|              |          |      |           |        |    |       |    |
|--------------|----------|------|-----------|--------|----|-------|----|
| IPI00024705; | GIPC1    | 24.3 | 3.12E-53  | -0.036 | 3  | 9.4   | Q2 |
| IPI00297084; | DDOST    | 38.4 | 5.57E-212 | -0.036 | 22 | 100.6 | Q2 |
| IPI00012828; | ACAA1    | 15.3 | 2.02E-160 | -0.036 | 5  | 3.8   | Q2 |
| IPI00007676; | HSD17B12 | 35.6 | 6.98E-92  | -0.036 | 8  | 5.9   | Q2 |
| IPI00028561; | KIF5C    | 0.9  | 1.10E-120 | -0.036 | 2  | 4.0   | Q2 |
| IPI00031169; | RAB2A    | 61.8 | 5.82E-173 | -0.036 | 17 | 11.2  | Q2 |
| IPI00642238; | HP1BP3   | 27.1 | 3.27E-139 | -0.036 | 13 | 7.4   | Q2 |
| IPI00007001; | MRPL11   | 24.5 | 1.42E-16  | -0.036 | 2  | 4.0   | Q2 |
| IPI00025874; | RPN1     | 58.8 | <1.0E-304 | -0.036 | 41 | 98.6  | Q2 |
| IPI00219729; | SLC25A11 | 38.9 | 1.38E-65  | -0.036 | 7  | 7.4   | Q2 |
| IPI00477494; | DRAP1    | 10.4 | 1.33E-15  | -0.035 | 2  | 3.9   | Q2 |
| IPI00030255; | PLOD3    | 42.5 | <1.0E-304 | -0.035 | 26 | 7.1   | Q2 |
| IPI00514053; | ARCN1    | 39.3 | 2.93E-163 | -0.035 | 17 | 11.9  | Q2 |
| IPI00246975; | GSTM3    | 55.1 | 9.14E-141 | -0.035 | 7  | 3.4   | Q2 |
| IPI00419250; | GSTT2    | 41.4 | 2.01E-76  | -0.035 | 8  | 7.0   | Q2 |
| IPI00023006; | ACTC1    | 46.9 | <1.0E-304 | -0.034 | 19 | 34.5  | Q2 |
| IPI00300567; | DCI      | 18.2 | 1.40E-42  | -0.034 | 2  | 4.6   | Q2 |
| IPI00016670  | C11orf59 | 50.3 | 9.17E-88  | -0.034 | 7  | 5.8   | Q2 |
| IPI00893443; | EMILIN1  | 10.1 | 6.63E-14  | -0.034 | 2  | 11.8  | Q2 |
| IPI00022334  | OAT      | 40.8 | 8.16E-141 | -0.034 | 9  | 14.4  | Q2 |
| IPI00219446; | PEBP1    | 84   | <1.0E-304 | -0.034 | 15 | 10.0  | Q2 |
| IPI00291607; | ITPR3    | 5    | 1.22E-35  | -0.034 | 2  | 2.6   | Q2 |
| IPI00010790; | BGN      | 32.1 | 2.49E-37  | -0.034 | 10 | 9.9   | Q2 |
| IPI00456664; | NIT1     | 13.6 | 1.15E-48  | -0.033 | 4  | 6.9   | Q2 |
| IPI00024670; | REEP5    | 20.6 | 1.54E-40  | -0.033 | 6  | 17.5  | Q2 |
| IPI00010154; | GDI1     | 47.4 | <1.0E-304 | -0.033 | 14 | 15.1  | Q2 |
| IPI00003856; | ATP6V1E1 | 45.6 | 6.48E-72  | -0.033 | 11 | 13.9  | Q2 |
| IPI00026216; | NPEPPS   | 45.8 | 1.33E-287 | -0.033 | 27 | 10.5  | Q2 |
| IPI00217943; | RAB6A    | 54.8 | 3.42E-125 | -0.033 | 7  | 8.0   | Q2 |
| IPI00784414; | STAT3    | 42.9 | <1.0E-304 | -0.033 | 12 | 5.3   | Q2 |
| IPI00011937; | PRDX4    | 34.3 | 3.18E-126 | -0.033 | 9  | 3.1   | Q2 |
| IPI00215920  | ARF6     | 30.3 | 7.67E-51  | -0.033 | 3  | 9.3   | Q2 |
| IPI00004397; | RALB     | 24.1 | 2.37E-32  | -0.032 | 5  | 6.9   | Q2 |

|              |          |      |           |        |      |      |    |
|--------------|----------|------|-----------|--------|------|------|----|
| IPI00306960; | NARS     | 47.3 | <1.0E-304 | -0.032 | 15   | 7.6  | Q2 |
| IPI00028055; | TMED10   | 29.2 | 2.82E-197 | -0.032 | 10   | 3.7  | Q2 |
| IPI00216003; | CUL5     | 12.5 | 2.98E-27  | -0.032 | 2    | 8.4  | Q2 |
| IPI00030877  | SEPT15   | 23   | 2.68E-62  | -0.032 | 2    | 7.7  | Q2 |
| IPI00291893; | DCUN1D1  | 17.4 | 3.29E-68  | -0.032 | 3    | 12.6 | Q2 |
| IPI00008530; | RPLP0    | 57.4 | 3.62E-297 | -0.031 | 31   | 17.2 | Q2 |
| IPI00215948; | CTNNA1   | 59.4 | <1.0E-304 | -0.031 | 37   | 8.6  | Q2 |
| IPI00025285; | ATP6V1G1 | 44.9 | 9.84E-101 | -0.031 | 3    | 7.7  | Q2 |
| IPI00924713; | PCYT1A   | 13.2 | 1.13E-20  | -0.031 | 2    | 6.1  | Q2 |
| IPI00293126; | TBCB     | 45.9 | 1.85E-115 | -0.030 | 8    | 16.7 | Q2 |
| IPI00438170; | SNX12    | 42.4 | 1.26E-57  | -0.030 | 7    | 10.2 | Q2 |
| IPI00029046; | MLEC     | 29.5 | 2.89E-138 | -0.030 | 6    | 5.7  | Q2 |
| IPI00009906  | ARMCX3   | 15   | 5.07E-25  | -0.030 | 3    | 13.4 | Q2 |
| IPI00006865  | SEC22B   | 64.2 | 3.79E-259 | -0.029 | 25   | 9.1  | Q2 |
| IPI00064193; | TMX3     | 13.7 | 6.31E-49  | -0.029 | 4    | 3.2  | Q2 |
| IPI00655754; | UFD1L    | 20.7 | 2.03E-57  | -0.029 | 5    | 3.1  | Q2 |
| IPI00179330; | RPS27A   | 42.3 | 1.53E-80  | -0.029 | 60   | 10.6 | Q2 |
| IPI00910816; | SNW1     | 6.8  | 6.25E-16  | -0.029 | 2    | 5.8  | Q2 |
| IPI00011107  | IDH2     | 35.4 | 1.06E-106 | -0.029 | 8    | 6.6  | Q2 |
| IPI00010460; | AIP      | 20.3 | 2.48E-23  | -0.029 | 2    | 2.7  | Q2 |
| IPI00760962; | KANK2    | 33.1 | 9.77E-272 | -0.029 | 18   | 8.2  | Q2 |
| IPI00004436; | LSM1     | 39.1 | 7.35E-19  | -0.029 | 2    | 2.4  | Q2 |
| IPI00303476; | ATP5B    | 69.6 | <1.0E-304 | -0.029 | 55   | 22.4 | Q2 |
| IPI00215911; | APEX1    | 48.1 | 1.42E-212 | -0.029 | 7    | 76.2 | Q2 |
| IPI00216308; | VDAC1    | 71   | 6.49E-221 | -0.029 | 17   | 11.5 | Q2 |
| IPI00903286; | SNRPD1   | 29.5 | 8.90E-78  | -0.029 | 5    | 15.6 | Q2 |
| IPI00299095  | SNX2     | 30.8 | 8.03E-137 | -0.029 | 10   | 66.9 | Q2 |
| IPI00304692; | RBMX     | 34   | 7.04E-102 | -0.029 | 16   | 12.0 | Q2 |
| IPI00395605; | ARHGEF1  | 14.7 | 6.64E-55  | -0.028 | 6    | 3.2  | Q2 |
| IPI00013271; | DERL1    | 16.3 | 4.85E-19  | -0.028 | 2    | 5.5  | Q2 |
| IPI00021812; | AHNAK    | 78   | <1.0E-304 | -0.028 | 1372 | 19.3 | Q2 |
| IPI00219219; | LGALS1   | 95.6 | 1.08E-303 | -0.028 | 40   | 40.7 | Q2 |
| IPI00216047; | SMARCC2  | 8.2  | 8.20E-114 | -0.028 | 10   | 20.1 | Q2 |

|              |          |      |           |        |    |      |    |
|--------------|----------|------|-----------|--------|----|------|----|
| IPI00073958; | CNRIP1   | 39.6 | 6.54E-38  | -0.028 | 4  | 6.4  | Q2 |
| IPI00065500; | BROX     | 20.4 | 1.31E-43  | -0.027 | 3  | 6.5  | Q2 |
| IPI00910977; | MPST     | 24   | 2.18E-88  | -0.027 | 2  | 2.5  | Q2 |
| IPI00008868; | MAP1B    | 39.5 | <1.0E-304 | -0.027 | 85 | 14.9 | Q2 |
| IPI00414008; | LMOD1    | 18.4 | 9.20E-85  | -0.027 | 3  | 9.2  | Q2 |
| IPI00443909; | CNPY2    | 42.9 | 1.16E-126 | -0.027 | 6  | 8.8  | Q2 |
| IPI00034319; | CUTA     | 27.8 | 1.19E-42  | -0.027 | 2  | 8.6  | Q2 |
| IPI00554538; | TPP1     | 18.7 | <1.0E-304 | -0.027 | 3  | 7.0  | Q2 |
| IPI00005648; | SAFB2    | 13.4 | 2.28E-75  | -0.027 | 8  | 6.6  | Q2 |
| IPI00024976  | TOMM22   | 48.6 | 1.44E-86  | -0.027 | 4  | 2.9  | Q2 |
| IPI00018871; | ARL8B    | 45   | 5.00E-118 | -0.027 | 9  | 11.6 | Q2 |
| IPI00020356; | MAP1A    | 15.2 | <1.0E-304 | -0.027 | 29 | 10.2 | Q2 |
| IPI00784159; | ANKRD13D | 2.1  | 8.64E-10  | -0.026 | 2  | 1.2  | Q2 |
| IPI00026154; | PRKCSH   | 43.6 | 1.83E-200 | -0.026 | 15 | 21.1 | Q2 |
| IPI00027350; | PRDX2    | 36.9 | 1.32E-110 | -0.026 | 8  | 2.7  | Q2 |
| IPI00219910; | BLVRB    | 46.9 | 2.54E-137 | -0.026 | 8  | 7.0  | Q2 |
| IPI00017342  | RHOG     | 45   | 7.37E-201 | -0.026 | 8  | 10.2 | Q2 |
| IPI00102752; | RBM15    | 6.3  | 8.70E-09  | -0.026 | 2  | 14.5 | Q2 |
| IPI00101037  | RCN3     | 43.9 | 6.73E-200 | -0.026 | 9  | 14.6 | Q2 |
| IPI00033494; | MYL12B   | 68.6 | <1.0E-304 | -0.026 | 21 | 9.2  | Q2 |
| IPI00017375  | SEC23A   | 52.3 | <1.0E-304 | -0.026 | 31 | 10.7 | Q2 |
| IPI00025512; | HSPB1    | 87.3 | <1.0E-304 | -0.026 | 39 | 8.7  | Q2 |
| IPI00006052  | PFDN2    | 22.7 | 5.32E-62  | -0.026 | 4  | 4.4  | Q2 |
| IPI00013872; | KDEL3    | 15.9 | 2.27E-06  | -0.026 | 3  | 8.6  | Q2 |
| IPI00216719; | ERC1     | 21.2 | 4.77E-150 | -0.025 | 13 | 8.9  | Q2 |
| IPI00010860; | PSMD9    | 45.3 | 1.73E-42  | -0.025 | 3  | 9.3  | Q2 |
| IPI00427330; | SBDS     | 54.4 | 2.45E-40  | -0.025 | 9  | 6.3  | Q2 |
| IPI00015773; | COMMD3   | 16.4 | 4.04E-41  | -0.025 | 2  | 0.1  | Q2 |
| IPI00025815; | TARDBP   | 18   | 7.73E-127 | -0.025 | 6  | 7.1  | Q2 |
| IPI00294955  | LSM4     | 25.2 | 7.13E-65  | -0.024 | 2  | 5.6  | Q2 |
| IPI00023191; | TOM1     | 11.4 | 1.65E-103 | -0.024 | 4  | 12.1 | Q2 |
| IPI00927150; | CHCHD3   | 18.3 | 3.12E-87  | -0.024 | 4  | 5.1  | Q2 |
| IPI00002134; | PSMD5    | 36.3 | <1.0E-304 | -0.024 | 11 | 7.4  | Q2 |

|              |         |      |           |        |    |      |    |
|--------------|---------|------|-----------|--------|----|------|----|
| IPI00007750; | TUBA4A  | 10.7 | <1.0E-304 | -0.024 | 6  | 10.6 | Q2 |
| IPI00013468; | BUB3    | 26.2 | 2.33E-36  | -0.024 | 3  | 6.4  | Q2 |
| IPI00396015; | ACACA   | 14.2 | 2.73E-169 | -0.024 | 8  | 9.9  | Q2 |
| IPI00428967; | TIRAP3  | 13.6 | 2.32E-26  | -0.024 | 4  | 15.3 | Q2 |
| IPI00009253; | NAPA    | 54.2 | 4.36E-261 | -0.024 | 15 | 4.9  | Q2 |
| IPI00292134; | EPS15   | 7.6  | 1.02E-39  | -0.023 | 2  | 5.4  | Q2 |
| IPI00001661; | RCC1    | 17.3 | 5.85E-73  | -0.022 | 3  | 10.8 | Q2 |
| IPI00026964; | UQCRFS1 | 19   | 2.79E-36  | -0.022 | 3  | 9.7  | Q2 |
| IPI00031697; | TMEM109 | 12.8 | 9.72E-18  | -0.022 | 2  | 6.0  | Q2 |
| IPI00029997; | PGLS    | 67.1 | 2.10E-302 | -0.022 | 10 | 7.5  | Q2 |
| IPI00302712; | DYNC112 | 18.8 | 2.10E-161 | -0.022 | 6  | 11.2 | Q2 |
| IPI00306301; | PDHA1   | 19.6 | 7.03E-46  | -0.022 | 4  | 4.1  | Q2 |
| IPI00016112; | PXDN    | 11.8 | 1.15E-104 | -0.022 | 9  | 7.9  | Q2 |
| IPI00029159; | MRE11A  | 13.9 | 6.96E-103 | -0.022 | 4  | 3.1  | Q2 |
| IPI00216951; | DARS    | 47.5 | 3.94E-116 | -0.021 | 12 | 5.3  | Q2 |
| IPI00015865; | ADPRHL2 | 5.8  | 4.66E-22  | -0.021 | 2  | 6.5  | Q2 |
| IPI00016339; | RAB5C   | 47.7 | 3.40E-227 | -0.021 | 19 | 6.8  | Q2 |
| IPI00029133; | ATP5F1  | 43.4 | 7.87E-148 | -0.021 | 14 | 7.2  | Q2 |
| IPI00014263; | EIF4H   | 53.6 | 4.41E-235 | -0.021 | 11 | 13.2 | Q2 |
| IPI00031522; | HADHA   | 60.2 | <1.0E-304 | -0.021 | 40 | 8.2  | Q2 |
| IPI00032826; | ST13    | 27.4 | 5.32E-126 | -0.020 | 7  | 12.1 | Q2 |
| IPI00032473; | PPIL3   | 26.1 | 3.25E-19  | -0.020 | 3  | 2.4  | Q2 |
| IPI00796337; | PCBP2   | 21.6 | 6.36E-166 | -0.020 | 6  | 5.2  | Q2 |
| IPI00396231; | AER61   | 8.3  | 8.76E-24  | -0.020 | 2  | 5.7  | Q2 |
| IPI00027032; | LYPLA2  | 29.4 | 3.65E-90  | -0.020 | 4  | 4.9  | Q2 |
| IPI00018931; | VPS35   | 45.6 | <1.0E-304 | -0.020 | 17 | 17.5 | Q2 |
| IPI00299024; | BASP1   | 70.9 | <1.0E-304 | -0.019 | 11 | 8.2  | Q2 |
| IPI00796864; | DPM1    | 38   | 6.46E-72  | -0.019 | 4  | 5.5  | Q2 |
| IPI00470674; | CYB5R1  | 28.9 | 1.55E-31  | -0.019 | 7  | 9.2  | Q2 |
| IPI00009960; | IMMT    | 45.5 | <1.0E-304 | -0.019 | 15 | 10.8 | Q2 |
| IPI00332371; | PFKL    | 32.2 | <1.0E-304 | -0.019 | 11 | 46.2 | Q2 |
| IPI00215888; | SRP72   | 32.5 | 4.16E-183 | -0.019 | 5  | 4.1  | Q2 |
| IPI00219299; | TLN2    | 14.9 | <1.0E-304 | -0.019 | 7  | 9.7  | Q2 |

|              |          |      |           |        |    |      |    |
|--------------|----------|------|-----------|--------|----|------|----|
| IPI00239406; | SYNE2    | 2.6  | 6.14E-27  | -0.019 | 12 | 24.9 | Q2 |
| IPI00024403; | CPNE3    | 25.7 | 7.78E-114 | -0.019 | 7  | 5.0  | Q2 |
| IPI00465431  | LGALS3   | 37.2 | 1.58E-67  | -0.018 | 22 | 24.4 | Q2 |
| IPI00025277  | PDCD6    | 44   | 3.81E-48  | -0.018 | 4  | 8.6  | Q2 |
| IPI00220031; | PXN      | 15.4 | 3.69E-123 | -0.018 | 5  | 20.1 | Q2 |
| IPI00215777; | SLC25A3  | 43.5 | 5.51E-213 | -0.018 | 32 | 47.0 | Q2 |
| IPI00025084; | CAPNS1   | 66.8 | <1.0E-304 | -0.018 | 23 | 8.1  | Q2 |
| IPI00022824; | SH3GLB1  | 26.9 | 1.96E-63  | -0.018 | 5  | 10.7 | Q2 |
| IPI00550689; | C22orf28 | 23.8 | 2.18E-84  | -0.018 | 6  | 7.0  | Q2 |
| IPI00027014; | DCTN3    | 39.2 | 2.09E-18  | -0.018 | 5  | 1.3  | Q2 |
| IPI00010796; | P4HB     | 67.9 | <1.0E-304 | -0.018 | 87 | 21.3 | Q2 |
| IPI00219675; | RAC1     | 41.2 | 2.05E-73  | -0.018 | 12 | 5.8  | Q2 |
| IPI00747810; | FSCN1    | 54.6 | <1.0E-304 | -0.018 | 24 | 8.4  | Q2 |
| IPI00216975  | TPM4     | 72.2 | <1.0E-304 | -0.018 | 45 | 16.9 | Q2 |
| IPI00098902; | OGDH     | 29.8 | 3.36E-217 | -0.017 | 23 | 12.3 | Q2 |
| IPI00026268; | GNB1     | 33.2 | 2.91E-265 | -0.017 | 7  | 18.2 | Q2 |
| IPI00023591; | PURA     | 24.2 | 1.66E-171 | -0.017 | 5  | 6.8  | Q2 |
| IPI00027252; | PHB2     | 62.5 | <1.0E-304 | -0.017 | 17 | 47.1 | Q2 |
| IPI00642584; | KIAA0090 | 23.6 | 6.05E-118 | -0.017 | 14 | 14.5 | Q2 |
| IPI00005087  | TMOD3    | 34.9 | 3.00E-137 | -0.017 | 5  | 7.9  | Q2 |
| IPI00009225; | STX8     | 24.6 | 1.18E-87  | -0.017 | 2  | 10.3 | Q2 |
| IPI00221222  | SUB1     | 31.5 | 1.91E-44  | -0.017 | 6  | 3.9  | Q2 |
| IPI00099550; | UBQLN1   | 21.2 | 6.58E-85  | -0.017 | 3  | 8.7  | Q2 |
| IPI00026942; | ERLIN2   | 45.7 | 2.17E-287 | -0.016 | 9  | 47.1 | Q2 |
| IPI00293078  | DDX27    | 9.5  | 1.65E-23  | -0.016 | 5  | 16.1 | Q2 |
| IPI00646304; | PPIB     | 62   | 7.66E-304 | -0.016 | 38 | 5.6  | Q2 |
| IPI00298281  | LAMC1    | 19   | <1.0E-304 | -0.016 | 24 | 11.9 | Q2 |
| IPI00298547  | PARK7    | 78.8 | 1.12E-249 | -0.016 | 22 | 7.4  | Q2 |
| IPI00100160; | CAND1    | 41.8 | <1.0E-304 | -0.016 | 55 | 16.9 | Q2 |
| IPI00014361; | TSTA3    | 24.3 | 9.02E-96  | -0.016 | 5  | 8.3  | Q2 |
| IPI00026059; | SNTB1    | 5    | 2.44E-02  | -0.016 | 2  | 0.4  | Q2 |
| IPI00642211; | RNPEP    | 43.5 | 3.43E-235 | -0.016 | 14 | 10.0 | Q2 |
| IPI00020164; | PTP4A1   | 21.4 | 1.16E-29  | -0.016 | 2  | 1.9  | Q2 |

|              |                |      |           |        |    |      |    |
|--------------|----------------|------|-----------|--------|----|------|----|
| IPI00020567; | ARHGAP1        | 62.9 | <1.0E-304 | -0.016 | 10 | 7.6  | Q2 |
| IPI00440493; | ATP5A1         | 64   | <1.0E-304 | -0.015 | 46 | 28.9 | Q2 |
| IPI00006092; | PMM2           | 29.3 | 8.86E-22  | -0.015 | 5  | 12.7 | Q2 |
| IPI00017344; | RAB5B          | 33   | 5.94E-130 | -0.015 | 4  | 8.7  | Q2 |
| IPI00027342; | CAP2           | 15.9 | 8.36E-83  | -0.015 | 2  | 9.8  | Q2 |
| IPI00013723; | PIN1           | 47.2 | 1.63E-121 | -0.015 | 4  | 7.4  | Q2 |
| IPI00014053; | TOMM40         | 19.1 | 7.93E-27  | -0.015 | 3  | 11.3 | Q2 |
| IPI00913848; | FERMT2         | 53.6 | <1.0E-304 | -0.015 | 25 | 13.1 | Q2 |
| IPI00219067; | GSTM2          | 47.2 | 1.39E-167 | -0.014 | 5  | 6.0  | Q2 |
| IPI00005657; | PFDN6          | 24   | 3.05E-22  | -0.014 | 2  | 11.2 | Q2 |
| IPI00020898; | RPS6KA3        | 23.6 | 4.68E-54  | -0.014 | 4  | 3.4  | Q2 |
| IPI00008569; | YKT6           | 43.4 | 1.92E-119 | -0.014 | 9  | 5.7  | Q2 |
| IPI00787827; | PITRM1         | 21.8 | 4.91E-158 | -0.014 | 14 | 16.3 | Q2 |
| IPI00411733; | DHX30          | 4.7  | 3.86E-12  | -0.014 | 3  | 6.1  | Q2 |
| IPI00183002; | PPP1R12A       | 24.7 | 1.74E-238 | -0.014 | 19 | 15.6 | Q2 |
| IPI00015911; | DLD            | 21.4 | 6.24E-224 | -0.014 | 7  | 5.9  | Q2 |
| IPI00143921; | KDELC2         | 31.8 | 8.58E-177 | -0.013 | 7  | 7.5  | Q2 |
| IPI00027378; | UBXN1          | 27.3 | 3.78E-166 | -0.013 | 6  | 10.2 | Q2 |
| IPI00297113; | TRIM32         | 6.1  | 6.61E-50  | -0.013 | 2  | 3.6  | Q2 |
| IPI00748502; | CRTAP          | 26.7 | 7.76E-66  | -0.013 | 7  | 8.2  | Q2 |
| IPI00872762; | SUCLG1         | 22.3 | 1.63E-49  | -0.013 | 3  | 13.9 | Q2 |
| IPI00027444; | SERPINB1       | 14.5 | 1.30E-40  | -0.013 | 3  | 24.9 | Q2 |
| IPI00303207  | ABCE1          | 34.9 | 1.87E-303 | -0.013 | 6  | 15.0 | Q2 |
| IPI00016608; | TMED2          | 27.4 | 2.17E-16  | -0.013 | 9  | 9.6  | Q2 |
| IPI00874235; | ERGIC1         | 22.4 | 2.44E-36  | -0.012 | 3  | 6.3  | Q2 |
| IPI00022542; | ROCK1          | 16.8 | 1.23E-124 | -0.012 | 11 | 14.0 | Q2 |
| IPI00026546; | PAFAH1B2       | 27.1 | 7.37E-92  | -0.012 | 2  | 3.3  | Q2 |
| IPI00297452; | TFG/ALK fusion | 3.1  | 1.20E-04  | -0.012 | 2  | 0.4  | Q2 |
| IPI00304596; | NONO           | 46.1 | <1.0E-304 | -0.012 | 30 | 24.3 | Q2 |
| IPI00829865; | TMTC3          | 7.7  | 1.99E-46  | -0.012 | 4  | 23.5 | Q2 |
| IPI00477231; | MGEA5          | 9.1  | 4.55E-34  | -0.012 | 3  | 5.3  | Q2 |
| IPI00016457; | CRAT           | 16   | 1.40E-37  | -0.012 | 3  | 14.9 | Q2 |
| IPI00221325; | RANBP2         | 8.7  | 2.36E-186 | -0.012 | 13 | 26.0 | Q2 |

|              |          |      |           |        |     |      |    |
|--------------|----------|------|-----------|--------|-----|------|----|
| IPI00301364; | SKP1     | 33.1 | 1.66E-84  | -0.012 | 3   | 4.4  | Q2 |
| IPI00019157  | CSPG4    | 2.1  | 7.52E-28  | -0.012 | 3   | 18.9 | Q2 |
| IPI00550917; | TWF2     | 45.8 | 1.84E-204 | -0.011 | 6   | 50.5 | Q2 |
| IPI00003807; | ACP2     | 15.8 | 6.09E-28  | -0.011 | 3   | 7.9  | Q2 |
| IPI00328243; | PLD3     | 10.2 | 5.88E-44  | -0.011 | 7   | 8.5  | Q2 |
| IPI00016342; | RAB7A    | 83.1 | <1.0E-304 | -0.011 | 28  | 18.4 | Q2 |
| IPI00215901; | AK2      | 68.6 | 1.17E-108 | -0.011 | 11  | 63.2 | Q2 |
| IPI00298308; | ALDH1L2  | 44.5 | <1.0E-304 | -0.011 | 6   | 8.4  | Q2 |
| IPI00215824; | PSMB8    | 25.4 | 1.37E-67  | -0.011 | 2   | 0.9  | Q2 |
| IPI00333913; | NBAS     | 5.8  | 1.80E-40  | -0.011 | 4   | 16.2 | Q2 |
| IPI00219840; | AP2S1    | 16.9 | 7.32E-04  | -0.011 | 2   | 5.2  | Q2 |
| IPI00184546  | C12orf23 | 38.8 | 7.06E-21  | -0.010 | 2   | 0.2  | Q2 |
| IPI00030363; | ACAT1    | 46.4 | <1.0E-304 | -0.010 | 11  | 8.7  | Q2 |
| IPI00034277; | ATP13A1  | 12.5 | 6.51E-42  | -0.010 | 4   | 7.3  | Q2 |
| IPI00097495; | TBC1D2   | 17.7 | 1.15E-69  | -0.010 | 9   | 15.4 | Q2 |
| IPI00748145; | GNAI2    | 47.9 | 7.66E-259 | -0.010 | 14  | 6.4  | Q2 |
| IPI00168479; | APOA1BP  | 18.6 | 6.11E-108 | -0.010 | 3   | 7.0  | Q2 |
| IPI00873829; | ACAA2    | 28.7 | 2.96E-162 | -0.010 | 5   | 10.4 | Q2 |
| IPI00744692; | TALDO1   | 47.8 | 1.79E-146 | -0.010 | 10  | 8.1  | Q2 |
| IPI00719051; | EXOC5    | 9.2  | 5.63E-33  | -0.010 | 3   | 2.0  | Q2 |
| IPI00019502; | MYH9     | 75.4 | <1.0E-304 | -0.010 | 800 | 17.5 | Q2 |
| IPI00304435; | NIPSNAP1 | 26.4 | 4.35E-31  | -0.010 | 4   | 11.9 | Q2 |
| IPI00470779  | TXLNA    | 20.1 | 1.01E-30  | -0.010 | 4   | 4.9  | Q2 |
| IPI00793201; | AIMP1    | 29.5 | 4.82E-92  | -0.009 | 3   | 8.1  | Q2 |
| IPI00006482; | ATP1A1   | 35.2 | <1.0E-304 | -0.009 | 45  | 56.9 | Q2 |
| IPI00413500; | COMMD4   | 18.6 | 2.23E-04  | -0.009 | 2   | 2.7  | Q2 |
| IPI00414717; | GLG1     | 21.4 | 1.78E-104 | -0.009 | 24  | 16.8 | Q2 |
| IPI00477962; | UAP1L1   | 18.5 | 4.40E-117 | -0.009 | 4   | 23.1 | Q2 |
| IPI00411706; | ESD      | 39   | 4.15E-121 | -0.009 | 3   | 5.3  | Q2 |
| IPI00296922; | LAMB2    | 17.3 | 8.33E-237 | -0.009 | 17  | 9.8  | Q2 |
| IPI00217143; | SDHA     | 36.7 | 1.38E-285 | -0.009 | 5   | 8.3  | Q2 |
| IPI00022793; | HADHB    | 42.4 | 2.61E-137 | -0.009 | 14  | 18.4 | Q2 |
| IPI00017160; | VTA1     | 23.1 | 5.34E-16  | -0.009 | 5   | 14.2 | Q2 |

|              |          |      |           |        |    |      |    |
|--------------|----------|------|-----------|--------|----|------|----|
| IPI00328748; | ARMET    | 38.9 | 5.24E-85  | -0.009 | 6  | 10.4 | Q2 |
| IPI00552277; | UBL4A    | 24.4 | 1.55E-05  | -0.008 | 3  | 11.2 | Q2 |
| IPI00871870; | ARPC3    | 63.5 | 8.25E-123 | -0.008 | 13 | 7.2  | Q2 |
| IPI00305833  | SMU1     | 6.4  | 3.74E-10  | -0.008 | 2  | 3.5  | Q2 |
| IPI00217550; | MSRB3    | 10.8 | 9.28E-14  | -0.008 | 2  | 8.5  | Q2 |
| IPI00215893; | HMOX1    | 51.4 | 8.99E-195 | -0.008 | 7  | 6.0  | Q2 |
| IPI00004358; | PYGB     | 49   | <1.0E-304 | -0.008 | 25 | 10.1 | Q2 |
| IPI00305551; | GNA11    | 30.9 | 1.62E-111 | -0.008 | 6  | 3.9  | Q2 |
| IPI00015602; | TOMM70A  | 19.9 | 7.83E-134 | -0.008 | 6  | 8.2  | Q2 |
| IPI00217405  | UBR1     | 1.4  | 3.09E-03  | -0.007 | 2  | 17.6 | Q2 |
| IPI00018246; | HK1      | 48.9 | <1.0E-304 | -0.007 | 48 | 14.5 | Q2 |
| IPI00003968; | NDUFA9   | 24.4 | 5.07E-41  | -0.007 | 4  | 10.8 | Q2 |
| IPI00304742  | STK10    | 4.5  | 1.50E-99  | -0.007 | 3  | 2.6  | Q2 |
| IPI00102815; | NOC3L    | 4.9  | 6.40E-22  | -0.007 | 2  | 3.7  | Q2 |
| IPI00215918; | ARF4     | 38.9 | 2.51E-199 | -0.007 | 13 | 35.8 | Q2 |
| IPI00796891; | GOLGB1   | 27.3 | <1.0E-304 | -0.007 | 81 | 39.7 | Q2 |
| IPI00604664; | NDUFS1   | 39.4 | <1.0E-304 | -0.007 | 9  | 6.8  | Q2 |
| IPI00024911; | ERP29    | 47.1 | 1.15E-188 | -0.007 | 15 | 5.1  | Q2 |
| IPI00828150; | SUGT1    | 33.7 | 1.31E-152 | -0.006 | 4  | 30.5 | Q2 |
| IPI00657938; | SNX18    | 14.7 | 3.27E-87  | -0.006 | 4  | 17.4 | Q2 |
| IPI00430472; | ASCC3    | 6.3  | 1.27E-39  | -0.006 | 3  | 8.4  | Q2 |
| IPI00069750; | PUF60    | 27.9 | 8.62E-91  | -0.006 | 3  | 5.4  | Q2 |
| IPI00420014; | SNRNP200 | 33.7 | <1.0E-304 | -0.006 | 31 | 19.0 | Q2 |
| IPI00329801; | ANXA5    | 80.3 | <1.0E-304 | -0.006 | 85 | 7.6  | Q2 |
| IPI00219217; | LDHB     | 54.8 | <1.0E-304 | -0.006 | 33 | 7.5  | Q2 |
| IPI00215637; | DDX3X    | 48.3 | <1.0E-304 | -0.006 | 24 | 10.1 | Q2 |
| IPI00299149; | SUMO2    | 23.2 | 1.87E-22  | -0.006 | 7  | 8.9  | Q2 |
| IPI00217563; | ITGB1    | 26.1 | 9.04E-209 | -0.005 | 40 | 27.2 | Q2 |
| IPI00007346; | PPIH     | 22   | 6.35E-10  | -0.005 | 2  | 12.6 | Q2 |
| IPI00002520; | SHMT2    | 38.1 | 9.46E-178 | -0.005 | 11 | 7.4  | Q2 |
| IPI00009634; | SQRDL    | 26   | 1.27E-109 | -0.005 | 5  | 14.3 | Q2 |
| IPI00075248; | CALM1    | 78.5 | <1.0E-304 | -0.005 | 7  | 9.0  | Q2 |
| IPI00550368; | TENC1    | 1.7  | 9.25E-36  | -0.005 | 2  | 27.5 | Q2 |



|              |          |      |           |        |    |      |    |
|--------------|----------|------|-----------|--------|----|------|----|
| IPI00401264  | ERP44    | 24.4 | 4.88E-83  | -0.005 | 10 | 4.3  | Q2 |
| IPI00005537; | MRPL12   | 28.8 | 2.88E-34  | -0.005 | 2  | 1.4  | Q2 |
| IPI00020513; | ZYX      | 46.7 | <1.0E-304 | -0.005 | 15 | 4.8  | Q2 |
| IPI00329536; | EEA1     | 60.2 | <1.0E-304 | -0.005 | 60 | 10.1 | Q2 |
| IPI00018146; | YWHAQ    | 55.5 | <1.0E-304 | -0.004 | 15 | 12.0 | Q2 |
| IPI00293350; | TSNAX    | 23.1 | 7.58E-96  | -0.004 | 3  | 1.6  | Q2 |
| IPI00019385; | SSR4     | 34.8 | 8.20E-94  | -0.004 | 8  | 48.9 | Q2 |
| IPI00795979; | FLOT2    | 25.9 | 3.44E-80  | -0.004 | 3  | 10.9 | Q2 |
| IPI00025721; | COPS3    | 18.7 | 5.32E-60  | -0.004 | 5  | 9.9  | Q2 |
| IPI00299084  | TMEM33   | 19   | 8.93E-25  | -0.004 | 5  | 7.2  | Q2 |
| IPI00816415; | AKAP2    | 19.6 | 6.88E-261 | -0.004 | 9  | 7.6  | Q2 |
| IPI00643166; | PGM3     | 33.3 | 6.38E-166 | -0.004 | 9  | 10.7 | Q2 |
| IPI00032851; | COPZ1    | 35   | 2.27E-111 | -0.004 | 5  | 3.7  | Q2 |
| IPI00479191; | HNRNPH1  | 37.5 | <1.0E-304 | -0.004 | 20 | 11.1 | Q2 |
| IPI00291006; | MDH2     | 63.6 | <1.0E-304 | -0.004 | 24 | 4.8  | Q2 |
| IPI00219757; | GSTP1    | 61   | <1.0E-304 | -0.004 | 23 | 10.6 | Q2 |
| IPI00005161; | ARPC2    | 61.7 | 7.13E-141 | -0.004 | 16 | 19.8 | Q2 |
| IPI00220648  | PMVK     | 35.9 | 2.84E-17  | -0.003 | 4  | 4.5  | Q2 |
| IPI00794659; | RPS20    | 28.9 | 1.47E-47  | -0.003 | 7  | 5.3  | Q2 |
| IPI00004902; | ETFB     | 40.8 | 2.44E-98  | -0.003 | 11 | 7.2  | Q2 |
| IPI00013744  | ITGA2    | 15.5 | 2.95E-237 | -0.003 | 17 | 14.9 | Q2 |
| IPI00013475; | TUBB2A   | 20.9 | <1.0E-304 | -0.003 | 18 | 9.2  | Q2 |
| IPI00915855; | VDAC2    | 42.5 | 1.33E-177 | -0.003 | 10 | 5.6  | Q2 |
| IPI00328840; | THOC4    | 34.1 | 4.35E-103 | -0.003 | 6  | 5.6  | Q2 |
| IPI00006666; | SLC16A3  | 10.5 | 2.87E-14  | -0.003 | 2  | 10.4 | Q2 |
| IPI00513853; | STX12    | 21.4 | 8.49E-94  | -0.003 | 4  | 3.3  | Q2 |
| IPI00910883; | CALCOCO2 | 5.3  | 1.00E-02  | -0.003 | 2  | 13.2 | Q2 |
| IPI00292020  | SRM      | 35.4 | 8.68E-111 | -0.003 | 8  | 8.5  | Q2 |
| IPI00873875; | SH3KBP1  | 5.6  | 8.85E-17  | -0.002 | 2  | 1.5  | Q2 |
| IPI00022275; | SACM1L   | 15.3 | 1.60E-29  | -0.002 | 3  | 8.0  | Q2 |
| IPI00413611; | TOP1     | 21.2 | 7.58E-42  | -0.002 | 11 | 11.0 | Q2 |
| IPI00746030; | PLCD1    | 12   | 1.09E-46  | -0.002 | 2  | 2.9  | Q2 |
| IPI00893746; | NHP2L1   | 37.1 | 3.81E-32  | -0.002 | 2  | 3.8  | Q2 |

|              |          |      |           |        |    |      |    |
|--------------|----------|------|-----------|--------|----|------|----|
| IPI00017334; | PHB      | 67.6 | 5.15E-262 | -0.002 | 16 | 9.8  | Q2 |
| IPI00797126; | NACA     | 7.6  | 7.40E-178 | -0.002 | 9  | 5.8  | Q2 |
| IPI00215919; | ARF5     | 31.7 | 1.59E-150 | -0.002 | 4  | 5.7  | Q2 |
| IPI00015018; | PPA1     | 44.6 | 1.54E-188 | -0.002 | 6  | 15.7 | Q2 |
| IPI00008982; | ALDH18A1 | 44.3 | <1.0E-304 | -0.002 | 17 | 15.2 | Q2 |
| IPI00293464; | DDB1     | 35   | 1.06E-238 | -0.002 | 27 | 10.9 | Q2 |
| IPI00007058; | CORO1B   | 24.1 | 1.53E-93  | -0.002 | 8  | 9.6  | Q2 |
| IPI00186969; | SCYL1    | 15.6 | 1.25E-76  | -0.001 | 6  | 8.9  | Q2 |
| IPI00106687  | LXN      | 16.7 | 7.97E-45  | -0.001 | 2  | 4.0  | Q2 |
| IPI00747533; | PGD      | 49   | <1.0E-304 | -0.001 | 8  | 6.2  | Q2 |
| IPI00017617; | DDX5     | 27.4 | 6.85E-143 | -0.001 | 12 | 7.1  | Q2 |
| IPI00411426; | VPS26A   | 27.8 | 1.75E-184 | -0.001 | 5  | 7.1  | Q2 |
| IPI00169383; | PGK1     | 83.2 | <1.0E-304 | -0.001 | 39 | 13.3 | Q2 |
| IPI00023647; | UBA6     | 26.5 | 3.36E-234 | -0.001 | 20 | 6.7  | Q2 |
| IPI00642984; | BCAP31   | 22.4 | 1.20E-61  | -0.001 | 10 | 13.2 | Q2 |
| IPI00060715; | KCTD12   | 18.5 | 3.13E-24  | -0.001 | 3  | 9.9  | Q2 |
| IPI00022827; | SLK      | 14.6 | 1.08E-62  | -0.001 | 10 | 20.9 | Q2 |
| IPI00794221; | DBN1     | 25.3 | 1.99E-293 | -0.001 | 13 | 6.4  | Q2 |
| IPI00384456; | MSH6     | 6.2  | 3.30E-22  | -0.001 | 3  | 41.1 | Q2 |
| IPI00853201; | MRPL23   | 23.6 | 1.12E-12  | -0.001 | 2  | 3.4  | Q2 |
| IPI00018873; | NAMPT    | 37.1 | <1.0E-304 | -0.001 | 6  | 4.4  | Q2 |
| IPI00018813; | COPS2    | 26.2 | 5.15E-69  | -0.001 | 6  | 7.4  | Q2 |
| IPI00607685; | NUDT4    | 13.3 | 5.28E-03  | 0.000  | 2  | 3.5  | Q2 |
| IPI00909642; | FLNA     | 0.6  | <1.0E-304 | 0.000  | 7  | 14.1 | Q2 |
| IPI00217918  | ELMOD2   | 6.5  | 1.64E-09  | 0.000  | 2  | 3.6  | Q2 |
| IPI00024919; | PRDX3    | 43.8 | 3.48E-155 | 0.000  | 9  | 20.6 | Q2 |
| IPI00103994; | LARS     | 40.1 | <1.0E-304 | 0.000  | 34 | 10.3 | Q2 |
| IPI00790739; | ACO2     | 44.1 | <1.0E-304 | 0.000  | 16 | 8.2  | Q2 |
| IPI00026516; | OXCT1    | 22.3 | 5.84E-169 | 0.000  | 5  | 9.4  | Q2 |
| IPI00376756; | HMGB3    | 13   | 1.25E-10  | 0.000  | 2  | 10.6 | Q2 |
| IPI00000643; | BAG2     | 40.3 | 9.98E-82  | 0.000  | 8  | 6.9  | Q2 |
| IPI00026105; | SCP2     | 28.7 | 1.95E-115 | 0.000  | 15 | 3.9  | Q2 |
| IPI00216319; | YWHAH    | 44.3 | 1.48E-243 | 0.000  | 13 | 17.5 | Q2 |

|              |          |      |           |       |    |      |    |
|--------------|----------|------|-----------|-------|----|------|----|
| IPI00168262; | GLT25D1  | 25.7 | 1.46E-168 | 0.000 | 12 | 26.0 | Q2 |
| IPI00171798; | MTA2     | 10.5 | 1.97E-13  | 0.000 | 2  | 17.8 | Q2 |
| IPI00008240; | MARS     | 26.6 | <1.0E-304 | 0.001 | 16 | 13.1 | Q2 |
| IPI00644712; | XRCC6    | 53.4 | <1.0E-304 | 0.001 | 25 | 15.8 | Q2 |
| IPI00219077; | LTA4H    | 46.3 | 3.03E-285 | 0.001 | 11 | 5.9  | Q2 |
| IPI00643342; | PEA15    | 54.3 | 5.99E-180 | 0.001 | 8  | 3.9  | Q2 |
| IPI00745568; | TIPRL    | 38.6 | 3.71E-19  | 0.001 | 7  | 10.0 | Q2 |
| IPI00000030; | PPP2R5D  | 15.4 | 1.15E-32  | 0.001 | 4  | 4.7  | Q2 |
| IPI00219153; | RPL22    | 59.4 | 2.54E-73  | 0.001 | 4  | 1.8  | Q2 |
| IPI00217490; | FNDC3B   | 8.2  | 1.10E-55  | 0.001 | 2  | 12.2 | Q2 |
| IPI00641829; | BAT1     | 41.3 | 5.86E-188 | 0.001 | 10 | 16.1 | Q2 |
| IPI00871851; | NEDD5    | 51   | <1.0E-304 | 0.001 | 16 | 9.2  | Q2 |
| IPI00011416; | ECH1     | 26.8 | 9.16E-137 | 0.002 | 5  | 8.5  | Q2 |
| IPI00009822; | SRP54    | 29.6 | 8.15E-162 | 0.002 | 5  | 12.3 | Q2 |
| IPI00170935  | LRRC47   | 29   | 3.48E-165 | 0.002 | 8  | 9.0  | Q2 |
| IPI00395488  | VASN     | 8.2  | 2.39E-151 | 0.002 | 4  | 17.4 | Q2 |
| IPI00022977; | CKB      | 21.5 | 3.74E-132 | 0.002 | 2  | 7.4  | Q2 |
| IPI00005198; | ILF2     | 32.6 | 2.10E-245 | 0.003 | 14 | 6.2  | Q2 |
| IPI00289758; | CAPN2    | 60.9 | <1.0E-304 | 0.003 | 20 | 6.1  | Q2 |
| IPI00009949; | PSMF1    | 16.2 | 9.93E-75  | 0.003 | 3  | 11.2 | Q2 |
| IPI00023640; | PDCD5    | 60.8 | 2.35E-50  | 0.003 | 4  | 15.1 | Q2 |
| IPI00007814; | ATP6V1C1 | 29.6 | 5.46E-135 | 0.003 | 6  | 2.0  | Q2 |
| IPI00654569; | CAMK2D   | 23.3 | 1.26E-137 | 0.003 | 6  | 5.0  | Q2 |
| IPI00007755; | RAB21    | 39.1 | 2.06E-101 | 0.003 | 5  | 2.9  | Q2 |
| IPI00216694; | PLS3     | 67.1 | <1.0E-304 | 0.003 | 33 | 9.9  | Q2 |
| IPI00328170; | MOGS     | 35.1 | 7.51E-178 | 0.003 | 13 | 9.7  | Q2 |
| IPI00017469; | SPR      | 29.1 | 4.69E-234 | 0.003 | 5  | 13.0 | Q2 |
| IPI00023234  | UBA2     | 29.1 | 7.94E-116 | 0.003 | 3  | 2.1  | Q2 |
| IPI00021129; | AP3B1    | 28.9 | 6.02E-137 | 0.004 | 28 | 6.8  | Q2 |
| IPI00027175; | SRI      | 23.7 | 3.15E-18  | 0.004 | 4  | 12.2 | Q2 |
| IPI00644231; | CYFIP1   | 29.2 | <1.0E-304 | 0.004 | 30 | 13.1 | Q2 |
| IPI00217468; | HIST1H1B | 22.1 | 2.79E-72  | 0.004 | 9  | 18.6 | Q2 |
| IPI00871693; | VAMP3    | 53   | 9.92E-134 | 0.004 | 7  | 8.5  | Q2 |

|              |               |      |           |       |     |      |    |
|--------------|---------------|------|-----------|-------|-----|------|----|
| IPI00647217  | SKIV2L2       | 8.2  | 6.30E-12  | 0.004 | 5   | 7.5  | Q2 |
| IPI00013122  | CDC37         | 34.7 | 3.68E-216 | 0.005 | 9   | 4.8  | Q2 |
| IPI00334159  | VBP1          | 38.2 | 2.58E-56  | 0.005 | 7   | 10.2 | Q2 |
| IPI00478231; | RHOA          | 59.6 | 2.14E-272 | 0.005 | 23  | 7.9  | Q2 |
| IPI00028957; | UBE4A         | 9.4  | 8.40E-41  | 0.005 | 6   | 11.4 | Q2 |
| IPI00177728; | CNDP2         | 54.7 | 1.08E-161 | 0.005 | 12  | 11.9 | Q2 |
| IPI00298991; | KIAA1033      | 20.5 | 2.37E-234 | 0.005 | 13  | 9.6  | Q2 |
| IPI00068506; | ABCF2         | 10.4 | 6.12E-41  | 0.005 | 4   | 7.5  | Q2 |
| IPI00395887; | TMX1          | 19.3 | 6.42E-46  | 0.005 | 3   | 3.8  | Q2 |
| IPI00000874; | PRDX1         | 67.8 | 8.74E-252 | 0.005 | 31  | 12.8 | Q2 |
| IPI00640088; | CSNK2B        | 27.8 | 9.68E-29  | 0.005 | 4   | 11.8 | Q2 |
| IPI00005978; | SFRS2         | 28.1 | 2.11E-100 | 0.005 | 6   | 10.3 | Q2 |
| IPI00411680; | PCMT1         | 31.6 | 4.19E-154 | 0.005 | 5   | 30.4 | Q2 |
| IPI00216318; | YWHAB         | 58.9 | <1.0E-304 | 0.005 | 19  | 6.6  | Q2 |
| IPI00829927; | ARMC9         | 30.2 | 1.57E-227 | 0.005 | 24  | 10.8 | Q2 |
| IPI00305383  | UQCRC2        | 37.7 | 2.29E-229 | 0.006 | 9   | 10.7 | Q2 |
| IPI00828098; | RNF213        | 1    | 1.87E-142 | 0.006 | 3   | 11.0 | Q2 |
| IPI00299571; | PDIA6         | 49.2 | <1.0E-304 | 0.006 | 27  | 7.7  | Q2 |
| IPI00027443; | DKFZp686F1612 | 30.7 | 6.65E-161 | 0.006 | 13  | 9.9  | Q2 |
| IPI00219682; | STOM          | 45.1 | <1.0E-304 | 0.006 | 16  | 5.8  | Q2 |
| IPI00419237; | LAP3          | 40.7 | 4.38E-179 | 0.006 | 14  | 8.3  | Q2 |
| IPI00889514; | HEATR7A       | 6.8  | 4.14E-55  | 0.006 | 4   | 5.7  | Q2 |
| IPI00020436; | RAB11B        | 50.9 | 1.79E-184 | 0.006 | 14  | 6.0  | Q2 |
| IPI00298994; | TLN1          | 69.1 | <1.0E-304 | 0.006 | 347 | 15.5 | Q2 |
| IPI00014377; | RAB32         | 57.3 | 3.25E-65  | 0.007 | 7   | 6.2  | Q2 |
| IPI00016610  | PCBP1         | 41   | 9.37E-207 | 0.007 | 14  | 15.6 | Q2 |
| IPI00017963; | SNRPD2        | 67.8 | 5.66E-41  | 0.007 | 5   | 7.5  | Q2 |
| IPI00024364; | TNPO1         | 24.4 | 1.18E-156 | 0.007 | 13  | 6.6  | Q2 |
| IPI00029079; | GMPS          | 28.1 | 2.36E-175 | 0.007 | 8   | 7.1  | Q2 |
| IPI00147874; | NANS          | 27.9 | 6.42E-59  | 0.007 | 7   | 17.7 | Q2 |
| IPI00010349; | AGPS          | 16.3 | 5.96E-149 | 0.007 | 3   | 24.7 | Q2 |
| IPI00005707; | MRC2          | 20.9 | <1.0E-304 | 0.007 | 20  | 9.4  | Q2 |
| IPI00914048; | C11orf68      | 17.7 | 1.69E-09  | 0.007 | 2   | 6.8  | Q2 |

|              |               |      |           |       |     |      |    |
|--------------|---------------|------|-----------|-------|-----|------|----|
| IPI00916111; | MDH1          | 37.8 | 3.33E-254 | 0.007 | 9   | 6.1  | Q2 |
| IPI00009104; | RUVBL2        | 38.9 | 7.83E-275 | 0.008 | 10  | 9.4  | Q2 |
| IPI00019407; | NSDHL         | 21.4 | 1.25E-34  | 0.008 | 3   | 1.0  | Q2 |
| IPI00005154; | SSRP1         | 30.3 | 1.15E-246 | 0.008 | 11  | 10.3 | Q2 |
| IPI00218733; | SOD1          | 50   | 5.13E-187 | 0.008 | 4   | 7.3  | Q2 |
| IPI00011285; | CAPN1         | 49.2 | <1.0E-304 | 0.008 | 30  | 7.7  | Q2 |
| IPI00022254; | ATG3          | 24.2 | 1.34E-54  | 0.008 | 3   | 9.0  | Q2 |
| IPI00028888; | HNRNPD        | 39.7 | <1.0E-304 | 0.008 | 15  | 7.4  | Q2 |
| IPI00844578; | DHX9          | 43.5 | <1.0E-304 | 0.008 | 75  | 11.1 | Q2 |
| IPI00033022; | DNM2          | 35.7 | 3.99E-182 | 0.008 | 22  | 14.4 | Q2 |
| IPI00375380; | PSMD13        | 49.5 | 7.30E-210 | 0.008 | 5   | 4.4  | Q2 |
| IPI00639957; | CARM1         | 22   | 2.08E-64  | 0.008 | 6   | 26.1 | Q2 |
| IPI00872261; | AHCYL1        | 15.7 | 5.73E-13  | 0.008 | 4   | 6.8  | Q2 |
| IPI00009032; | SSB           | 35   | 6.61E-98  | 0.008 | 5   | 87.8 | Q2 |
| IPI00216293; | TST           | 16.8 | 1.05E-61  | 0.008 | 2   | 9.1  | Q2 |
| IPI00549725; | PGAM1         | 78   | <1.0E-304 | 0.008 | 29  | 13.9 | Q2 |
| IPI00246058; | PDCD6IP       | 53.8 | <1.0E-304 | 0.009 | 36  | 10.1 | Q2 |
| IPI00759776; | ACTN1         | 57.2 | <1.0E-304 | 0.009 | 103 | 28.2 | Q2 |
| IPI00217920; | ALDH16A1      | 11.7 | 1.70E-49  | 0.009 | 4   | 3.7  | Q2 |
| IPI00029764; | SF3A3         | 18.6 | 1.12E-71  | 0.009 | 6   | 11.8 | Q2 |
| IPI00010187; | ELOVL1        | 9    | 7.69E-31  | 0.009 | 9   | 32.0 | Q2 |
| IPI00307545; | TNS1          | 12.6 | 1.13E-147 | 0.010 | 15  | 12.8 | Q2 |
| IPI00413895; | GOLGA2        | 12.5 | 6.64E-72  | 0.010 | 7   | 3.7  | Q2 |
| IPI00554737; | PPP2R1A       | 50.4 | <1.0E-304 | 0.010 | 21  | 8.2  | Q2 |
| IPI00413961; | DKFZp666O0110 | 4.7  | 4.84E-23  | 0.010 | 3   | 10.7 | Q2 |
| IPI00014898; | PLEC1         | 69.8 | <1.0E-304 | 0.010 | 684 | 16.2 | Q2 |
| IPI00007423; | ANP32B        | 37.1 | 6.24E-143 | 0.010 | 14  | 11.8 | Q2 |
| IPI00916503; | BZW1          | 30.6 | 1.07E-56  | 0.011 | 9   | 6.8  | Q2 |
| IPI00926491; | PTCD1         | 3.2  | 1.20E-23  | 0.011 | 2   | 12.1 | Q2 |
| IPI00000581; | OTUB1         | 34.1 | 2.06E-106 | 0.011 | 6   | 7.6  | Q2 |
| IPI00003479; | MAPK1         | 52.2 | 1.67E-176 | 0.011 | 8   | 8.5  | Q2 |
| IPI00001699; | PYCARD        | 42.6 | 2.23E-62  | 0.011 | 8   | 3.8  | Q2 |
| IPI00006451; | NSF           | 47.8 | <1.0E-304 | 0.011 | 23  | 14.4 | Q2 |

|              |          |      |           |       |    |      |    |
|--------------|----------|------|-----------|-------|----|------|----|
| IPI00010105; | EIF6     | 32.7 | 5.01E-159 | 0.011 | 4  | 9.7  | Q2 |
| IPI00014398; | FHL1     | 42.1 | 5.57E-149 | 0.011 | 10 | 10.9 | Q2 |
| IPI00033143  | EIF3K    | 16.5 | 6.75E-40  | 0.011 | 3  | 5.7  | Q2 |
| IPI00179713; | IGF2BP2  | 32.7 | 3.52E-239 | 0.011 | 9  | 5.9  | Q2 |
| IPI00909773; | UBE2L3   | 25.9 | 6.17E-212 | 0.012 | 4  | 5.1  | Q2 |
| IPI00337494; | SLC25A24 | 37.5 | 9.32E-172 | 0.012 | 5  | 11.2 | Q2 |
| IPI00012011; | CFL1     | 91.6 | <1.0E-304 | 0.012 | 28 | 33.2 | Q2 |
| IPI00026262; | RASA1    | 7.7  | 5.13E-65  | 0.012 | 5  | 4.0  | Q2 |
| IPI00031131; | APMAP    | 27.9 | 5.18E-63  | 0.012 | 7  | 5.1  | Q2 |
| IPI00007928; | PRPF8    | 27.3 | <1.0E-304 | 0.012 | 32 | 10.2 | Q2 |
| IPI00215884; | SFRS1    | 43.5 | 8.02E-121 | 0.012 | 8  | 3.8  | Q2 |
| IPI00257059  | TMEM173  | 18.7 | 6.51E-140 | 0.012 | 2  | 7.4  | Q2 |
| IPI00295992; | ATAD3A   | 32.1 | 5.62E-143 | 0.012 | 13 | 11.2 | Q2 |
| IPI00654582; | TOLLIP   | 14.5 | 6.62E-46  | 0.012 | 6  | 22.2 | Q2 |
| IPI00180404; | NEXN     | 23.7 | 5.55E-60  | 0.013 | 9  | 6.6  | Q2 |
| IPI00219249  | CNTNAP1  | 14.8 | 3.37E-129 | 0.013 | 10 | 12.7 | Q2 |
| IPI00018311; | NPTN     | 9.3  | 3.60E-10  | 0.013 | 2  | 3.7  | Q2 |
| IPI00910322  | TPM4     | 33.1 | <1.0E-304 | 0.013 | 9  | 10.3 | Q2 |
| IPI00000811; | PSMB6    | 17.6 | 1.02E-20  | 0.013 | 3  | 3.9  | Q2 |
| IPI00217975; | LMNB1    | 51.7 | <1.0E-304 | 0.013 | 17 | 14.7 | Q2 |
| IPI00409717; | EIF4A2   | 12.7 | 2.42E-282 | 0.013 | 3  | 0.6  | Q2 |
| IPI00473047; | PRKAG1   | 19.7 | 1.16E-215 | 0.013 | 3  | 10.3 | Q2 |
| IPI00011250; | UCHL3    | 22.6 | 3.50E-65  | 0.013 | 3  | 4.3  | Q2 |
| IPI00555956  | PSMB4    | 40.9 | 1.96E-206 | 0.013 | 10 | 10.4 | Q2 |
| IPI00894395; | PSMB9    | 21   | 2.94E-13  | 0.013 | 2  | 5.3  | Q2 |
| IPI00247871; | TCERG1   | 8.7  | 1.86E-15  | 0.014 | 5  | 6.2  | Q2 |
| IPI00472442; | PSMA1    | 55   | 7.76E-129 | 0.014 | 11 | 34.2 | Q2 |
| IPI00791086; | EIF3D    | 28.5 | 1.63E-185 | 0.014 | 6  | 4.7  | Q2 |
| IPI00025252; | PDIA3    | 65   | <1.0E-304 | 0.014 | 54 | 7.8  | Q2 |
| IPI00021840; | RPS6     | 33.3 | 5.17E-110 | 0.014 | 16 | 9.5  | Q2 |
| IPI00180954; | CIRBP    | 33.1 | 3.83E-52  | 0.014 | 3  | 0.2  | Q2 |
| IPI00215914; | ARF1     | 75.7 | 3.56E-273 | 0.014 | 17 | 6.7  | Q2 |
| IPI00290460; | EIF3G    | 17.5 | 1.04E-58  | 0.014 | 3  | 2.7  | Q2 |

|              |         |      |           |       |    |      |    |
|--------------|---------|------|-----------|-------|----|------|----|
| IPI00303318; | FAM49B  | 13.3 | 5.93E-52  | 0.014 | 2  | 11.8 | Q2 |
| IPI00029264  | CYC1    | 10.8 | 5.89E-40  | 0.014 | 3  | 26.6 | Q2 |
| IPI00395694; | TNPO3   | 10   | 6.00E-117 | 0.014 | 4  | 4.0  | Q2 |
| IPI00010153; | RPL23   | 52.9 | 6.09E-207 | 0.015 | 11 | 6.5  | Q2 |
| IPI00658171; | YIF1A   | 13.1 | 9.77E-58  | 0.015 | 2  | 13.7 | Q2 |
| IPI00018206; | GOT2    | 36.7 | 4.29E-209 | 0.015 | 9  | 4.8  | Q2 |
| IPI00220416; | UQCRB   | 17.1 | 4.43E-13  | 0.015 | 2  | 10.0 | Q2 |
| IPI00015148; | RAP1B   | 67.4 | 1.61E-187 | 0.015 | 14 | 7.4  | Q2 |
| IPI00027280; | TOP2B   | 15.1 | 9.05E-180 | 0.015 | 7  | 3.5  | Q2 |
| IPI00513791; | DOCK7   | 13.5 | 1.39E-102 | 0.016 | 12 | 13.8 | Q2 |
| IPI00000861; | LASP1   | 44.4 | 1.72E-110 | 0.016 | 18 | 8.5  | Q2 |
| IPI00552073; | DHX16   | 3.4  | 1.57E-04  | 0.016 | 2  | 16.7 | Q2 |
| IPI00000634; | CCDC6   | 8.7  | 1.41E-15  | 0.016 | 2  | 19.3 | Q2 |
| IPI00399265; | TPD52L2 | 55.9 | <1.0E-304 | 0.016 | 16 | 27.8 | Q2 |
| IPI00026302; | RPL31   | 53.6 | 2.11E-46  | 0.016 | 7  | 11.9 | Q2 |
| IPI00029731; | RPL35A  | 46.4 | 8.89E-10  | 0.016 | 9  | 7.3  | Q2 |
| IPI00002460; | ANXA7   | 30.5 | 2.14E-96  | 0.016 | 8  | 6.5  | Q2 |
| IPI00021808; | HARS    | 37.9 | 8.29E-136 | 0.016 | 8  | 20.0 | Q2 |
| IPI00024466; | UGCGL1  | 39.5 | <1.0E-304 | 0.016 | 52 | 11.5 | Q2 |
| IPI00784154; | HSPD1   | 72.3 | <1.0E-304 | 0.016 | 42 | 11.0 | Q2 |
| IPI00514587; | SARS    | 36.9 | 1.38E-154 | 0.017 | 13 | 7.3  | Q2 |
| IPI00010201; | PSMD8   | 20.9 | 9.11E-88  | 0.017 | 5  | 5.1  | Q2 |
| IPI00015902; | PDGFRB  | 18.9 | 2.54E-232 | 0.017 | 22 | 7.7  | Q2 |
| IPI00878611; | RANBP1  | 25.4 | 1.38E-32  | 0.017 | 7  | 7.2  | Q2 |
| IPI00742682; | TPR     | 23.7 | <1.0E-304 | 0.017 | 18 | 6.4  | Q2 |
| IPI00790757; | DUSP3   | 38.1 | 1.17E-147 | 0.017 | 2  | 1.0  | Q2 |
| IPI00012074; | HNRNPR  | 22.4 | 8.71E-165 | 0.017 | 8  | 18.3 | Q2 |
| IPI00031420  | UGDH    | 62.3 | <1.0E-304 | 0.017 | 17 | 7.4  | Q2 |
| IPI00376005; | EIF5A   | 60.9 | <1.0E-304 | 0.017 | 18 | 10.8 | Q2 |
| IPI00894409; | CPNE1   | 21.6 | 2.14E-140 | 0.018 | 9  | 12.4 | Q2 |
| IPI00014230; | C1QBP   | 36.9 | 5.85E-216 | 0.018 | 8  | 5.3  | Q2 |
| IPI00247583; | RPL21   | 46.2 | 2.36E-135 | 0.018 | 9  | 8.1  | Q2 |
| IPI00887678; | PPIA    | 55.6 | <1.0E-304 | 0.018 | 35 | 6.3  | Q2 |

|              |           |      |           |       |     |      |    |
|--------------|-----------|------|-----------|-------|-----|------|----|
| IPI00009542; | MAGED2    | 8.9  | 5.55E-08  | 0.018 | 5   | 13.9 | Q2 |
| IPI00008380; | PPP2CA    | 34   | 1.84E-127 | 0.018 | 5   | 7.9  | Q2 |
| IPI00782992; | SRRM2     | 5.3  | 4.30E-91  | 0.018 | 12  | 14.3 | Q2 |
| IPI00018188; | NECAP2    | 24.7 | 2.24E-62  | 0.018 | 2   | 3.6  | Q2 |
| IPI00658155; | MRPS34    | 13.3 | 2.52E-04  | 0.018 | 3   | 6.7  | Q2 |
| IPI00010706; | GSS       | 24.5 | 3.58E-23  | 0.018 | 7   | 10.1 | Q2 |
| IPI00043598  | IKIP      | 26   | 6.84E-123 | 0.018 | 7   | 10.8 | Q2 |
| IPI00029054; | NT5C2     | 19.8 | 5.25E-57  | 0.019 | 3   | 9.0  | Q2 |
| IPI00005613; | U2AF1     | 25.8 | 2.27E-98  | 0.019 | 3   | 7.6  | Q2 |
| IPI00180386; | GYG1      | 19.7 | 3.32E-104 | 0.019 | 9   | 5.5  | Q2 |
| IPI00926648; | APEH      | 25.9 | 1.85E-260 | 0.019 | 14  | 8.0  | Q2 |
| IPI00006907  | TIGAR     | 17.8 | 3.44E-84  | 0.019 | 3   | 2.9  | Q2 |
| IPI00011454; | GANAB     | 55.2 | <1.0E-304 | 0.019 | 93  | 9.5  | Q2 |
| IPI00299155; | PSMA4     | 55.6 | 2.10E-100 | 0.019 | 12  | 6.5  | Q2 |
| IPI00396378; | HNRNPA2B1 | 2.5  | <1.0E-304 | 0.019 | 2   | 1.3  | Q2 |
| IPI00003881  | HNRNPF    | 19.5 | 9.12E-205 | 0.019 | 3   | 3.7  | Q2 |
| IPI00016513  | RAB10     | 45.5 | 5.16E-58  | 0.019 | 7   | 5.2  | Q2 |
| IPI00019755; | GSTO1     | 51   | 2.02E-72  | 0.020 | 22  | 10.4 | Q2 |
| IPI00220642; | YWHAG     | 49   | <1.0E-304 | 0.020 | 17  | 11.4 | Q2 |
| IPI00220219; | COPB2     | 47.8 | <1.0E-304 | 0.020 | 26  | 11.0 | Q2 |
| IPI00173359; | UACA      | 16   | 2.65E-133 | 0.020 | 16  | 26.0 | Q2 |
| IPI00256861; | MACF1     | 29.4 | <1.0E-304 | 0.021 | 141 | 13.9 | Q2 |
| IPI00784013  | JAK1      | 5.1  | 2.75E-18  | 0.021 | 3   | 4.2  | Q2 |
| IPI00219518; | ARL1      | 30.9 | 1.20E-56  | 0.021 | 6   | 11.8 | Q2 |
| IPI00220301; | PRDX6     | 78.6 | <1.0E-304 | 0.021 | 31  | 32.1 | Q2 |
| IPI00871856; | STIP1     | 55.4 | <1.0E-304 | 0.021 | 25  | 17.5 | Q2 |
| IPI00456969; | DYNC1H1   | 54   | <1.0E-304 | 0.021 | 332 | 17.3 | Q2 |
| IPI00646556; | NDUFV2    | 13.5 | 2.90E-41  | 0.021 | 2   | 10.2 | Q2 |
| IPI00016613; | CSNK2A1   | 21.7 | 9.44E-73  | 0.021 | 4   | 6.0  | Q2 |
| IPI00293655  | DDX1      | 52.3 | <1.0E-304 | 0.022 | 16  | 5.3  | Q2 |
| IPI00303882; | M6PRBP1   | 68   | <1.0E-304 | 0.022 | 35  | 7.6  | Q2 |
| IPI00397366; | PPFIBP1   | 18.2 | 1.31E-95  | 0.022 | 16  | 11.0 | Q2 |
| IPI00477118; | TMEM214   | 27.6 | 7.19E-151 | 0.022 | 8   | 9.8  | Q2 |



|              |                |      |           |       |     |       |    |
|--------------|----------------|------|-----------|-------|-----|-------|----|
| IPI00008207; | MAN1B1         | 12.3 | 1.37E-115 | 0.022 | 3   | 8.8   | Q2 |
| IPI00027693; | SP140L         | 1.4  | 9.50E-12  | 0.022 | 2   | 2.4   | Q2 |
| IPI00031670  | FAM114A1       | 24.7 | 2.95E-220 | 0.022 | 7   | 9.8   | Q2 |
| IPI00021983; | NCSTN          | 14.5 | 5.03E-45  | 0.022 | 12  | 8.5   | Q2 |
| IPI00026271; | RPS14          | 41.7 | 1.21E-130 | 0.022 | 8   | 13.3  | Q2 |
| IPI00017184; | EHD1           | 54.7 | 5.72E-248 | 0.022 | 23  | 12.4  | Q2 |
| IPI00298558; | PDCD10         | 23.6 | 4.43E-18  | 0.022 | 4   | 5.5   | Q2 |
| IPI00334282; | FAM3C          | 41   | 4.93E-169 | 0.022 | 4   | 2.4   | Q2 |
| IPI00005159; | ACTR2          | 46.2 | 9.32E-187 | 0.022 | 19  | 5.5   | Q2 |
| IPI00179298; | HUWE1          | 12.5 | <1.0E-304 | 0.022 | 22  | 11.9  | Q2 |
| IPI00021692; | MBNL1          | 14.4 | 6.61E-13  | 0.023 | 3   | 207.2 | Q2 |
| IPI00010204; | SFRS3          | 43.3 | 7.48E-48  | 0.023 | 4   | 4.3   | Q2 |
| IPI00026970; | SUPT16H        | 19.7 | 2.48E-167 | 0.023 | 17  | 7.4   | Q2 |
| IPI00182757; | KIAA1967       | 37.8 | <1.0E-304 | 0.023 | 22  | 18.2  | Q2 |
| IPI00012007  | AHCY           | 42.6 | 6.29E-191 | 0.023 | 16  | 12.0  | Q2 |
| IPI00220373; | IDE            | 14.1 | 1.40E-72  | 0.023 | 7   | 13.4  | Q2 |
| IPI00289819; | IGF2R          | 15.2 | 1.02E-217 | 0.023 | 26  | 9.3   | Q2 |
| IPI00604759; | FAHD1          | 32.7 | 1.21E-166 | 0.023 | 3   | 1.7   | Q2 |
| IPI00022228; | HDLBP          | 52.8 | <1.0E-304 | 0.023 | 89  | 11.7  | Q2 |
| IPI00023330; | KIAA1468       | 6.5  | 4.00E-33  | 0.023 | 3   | 10.8  | Q2 |
| IPI00024175; | PSMA7          | 46.4 | 3.75E-187 | 0.023 | 12  | 12.8  | Q2 |
| IPI00328753; | KTN1           | 39.2 | <1.0E-304 | 0.023 | 41  | 13.3  | Q2 |
| IPI00418169; | DKFZp686P03159 | 78.4 | <1.0E-304 | 0.023 | 110 | 17.4  | Q2 |
| IPI00018398  | PSMC3          | 47.2 | <1.0E-304 | 0.023 | 11  | 5.6   | Q2 |
| IPI00647915; | TAGLN2         | 80.5 | <1.0E-304 | 0.023 | 31  | 6.0   | Q2 |
| IPI00000001; | STAU1          | 6.2  | 5.61E-30  | 0.024 | 3   | 10.7  | Q2 |
| IPI00908913; | hCG_2043421    | 28.6 | 2.18E-35  | 0.024 | 3   | 7.9   | Q2 |
| IPI00783097; | GARS           | 57.5 | <1.0E-304 | 0.024 | 32  | 8.5   | Q2 |
| IPI00016702; | RABGAP1        | 8.3  | 2.00E-39  | 0.024 | 3   | 1.3   | Q2 |
| IPI00479722; | PSME1          | 58.6 | 5.04E-243 | 0.024 | 18  | 9.5   | Q2 |
| IPI00744851; | HMGA1          | 7.6  | 5.46E-04  | 0.024 | 2   | 2.4   | Q2 |
| IPI00027834; | HNRNPL         | 53.1 | <1.0E-304 | 0.024 | 17  | 9.9   | Q2 |
| IPI00871176; | NIPSNAP3A      | 24   | 6.26E-25  | 0.025 | 4   | 5.0   | Q2 |

|              |          |      |           |       |     |      |    |
|--------------|----------|------|-----------|-------|-----|------|----|
| IPI00027434; | RHOC     | 18.7 | 2.33E-299 | 0.025 | 3   | 3.5  | Q2 |
| IPI00180675; | TUBA1A   | 61.6 | <1.0E-304 | 0.025 | 122 | 32.2 | Q2 |
| IPI00793155; | RAB34    | 21.2 | 3.87E-31  | 0.025 | 3   | 9.4  | Q2 |
| IPI00004838; | CRK      | 28   | 1.44E-134 | 0.025 | 7   | 9.3  | Q2 |
| IPI00021266; | RPL23A   | 52.6 | 1.56E-55  | 0.025 | 9   | 5.6  | Q2 |
| IPI00418262; | ALDOC    | 20   | <1.0E-304 | 0.025 | 9   | 7.8  | Q2 |
| IPI00031517; | MCM6     | 16.6 | 3.82E-79  | 0.025 | 8   | 13.2 | Q2 |
| IPI00024664; | USP5     | 38.7 | <1.0E-304 | 0.025 | 28  | 12.9 | Q2 |
| IPI00301936; | ELAVL1   | 33.7 | 4.30E-155 | 0.026 | 8   | 4.8  | Q2 |
| IPI00908416; | EIF4E    | 23   | 1.47E-30  | 0.026 | 6   | 8.1  | Q2 |
| IPI00011916; | AIMP2    | 16.9 | 2.45E-31  | 0.026 | 3   | 5.2  | Q2 |
| IPI00183786; | FADS2    | 15.3 | 6.10E-19  | 0.026 | 12  | 64.9 | Q2 |
| IPI00394737; | OSBPL8   | 26.7 | 1.14E-205 | 0.026 | 8   | 9.9  | Q2 |
| IPI00456758  | RPL27A   | 37.8 | 1.72E-35  | 0.026 | 5   | 8.1  | Q2 |
| IPI00003362; | HSPA5    | 55.6 | <1.0E-304 | 0.026 | 70  | 13.4 | Q2 |
| IPI00030275; | TRAP1    | 18.5 | 6.91E-107 | 0.026 | 8   | 9.9  | Q2 |
| IPI00172513; | APPL2    | 27.9 | 5.06E-188 | 0.026 | 7   | 9.2  | Q2 |
| IPI00006211; | VAPB     | 29.2 | 1.50E-60  | 0.027 | 3   | 1.5  | Q2 |
| IPI00747764; | KPNA6    | 15.5 | 3.89E-138 | 0.027 | 4   | 9.9  | Q2 |
| IPI00856098; | RRBP1    | 48.2 | <1.0E-304 | 0.027 | 163 | 23.7 | Q2 |
| IPI00221091; | RPS15A   | 49.2 | 4.53E-50  | 0.027 | 10  | 3.5  | Q2 |
| IPI00645078; | UBA1     | 47.8 | <1.0E-304 | 0.027 | 74  | 8.4  | Q2 |
| IPI00789551; | MATR3    | 32.8 | <1.0E-304 | 0.027 | 36  | 8.0  | Q2 |
| IPI00297211  | SMARCA5  | 19.8 | 3.52E-53  | 0.027 | 16  | 20.1 | Q2 |
| IPI00018627; | NAT13    | 33.7 | 1.27E-23  | 0.028 | 3   | 8.5  | Q2 |
| IPI00021440; | ACTG1    | 79.5 | <1.0E-304 | 0.028 | 255 | 33.5 | Q2 |
| IPI00384643; | TP53I3   | 24.1 | 9.30E-61  | 0.028 | 3   | 5.6  | Q2 |
| IPI00414384; | HSDL2    | 19.4 | 7.23E-111 | 0.028 | 3   | 3.3  | Q2 |
| IPI00007702; | HSPA2    | 19.1 | <1.0E-304 | 0.028 | 6   | 12.3 | Q2 |
| IPI00010317; | RRAGB    | 10.7 | 1.71E-25  | 0.028 | 2   | 3.4  | Q2 |
| IPI00019988; | SGSH     | 23.5 | 1.03E-90  | 0.028 | 3   | 11.7 | Q2 |
| IPI00056357  | C19orf10 | 27.2 | 3.02E-32  | 0.028 | 3   | 17.0 | Q2 |
| IPI00171903; | HNRNPM   | 58.9 | <1.0E-304 | 0.028 | 57  | 9.5  | Q2 |

|              |        |      |           |       |     |      |    |
|--------------|--------|------|-----------|-------|-----|------|----|
| IPI00396321  | LRRC59 | 43.3 | 4.78E-184 | 0.028 | 16  | 13.9 | Q2 |
| IPI00410488; | CD276  | 29.4 | 6.27E-101 | 0.028 | 5   | 8.7  | Q2 |
| IPI00297579; | CBX3   | 33.3 | 1.44E-146 | 0.029 | 7   | 9.2  | Q2 |
| IPI00333068; | ARPC1A | 14.9 | 5.45E-33  | 0.029 | 3   | 10.2 | Q2 |
| IPI00418471; | VIM    | 92.9 | <1.0E-304 | 0.029 | 407 | 25.1 | Q2 |
| IPI00060181; | EFHD2  | 24.2 | 3.25E-35  | 0.029 | 5   | 10.8 | Q2 |
| IPI00646058; | SAFB   | 4.7  | 9.60E-76  | 0.029 | 3   | 2.7  | Q2 |
| IPI00298292; | PTK7   | 24.8 | 6.07E-212 | 0.029 | 13  | 14.2 | Q2 |
| IPI00298961; | XPO1   | 40.6 | <1.0E-304 | 0.029 | 39  | 5.9  | Q2 |
| IPI00013808; | ACTN4  | 78.7 | <1.0E-304 | 0.029 | 194 | 12.4 | Q2 |
| IPI00009057; | G3BP2  | 15.1 | 2.78E-73  | 0.029 | 4   | 4.9  | Q2 |
| IPI00411559; | SMC4   | 6.5  | 1.80E-24  | 0.029 | 4   | 10.4 | Q2 |
| IPI00218288; | SEC24D | 15.7 | 8.40E-100 | 0.029 | 15  | 17.1 | Q2 |
| IPI00296337; | PRKDC  | 37.8 | <1.0E-304 | 0.029 | 126 | 12.7 | Q2 |
| IPI00027626; | CCT6A  | 47.8 | <1.0E-304 | 0.030 | 25  | 18.3 | Q2 |
| IPI00397947; | UBE2V1 | 17   | 8.67E-19  | 0.030 | 7   | 3.9  | Q2 |
| IPI00400922  | PDCD11 | 3.6  | 2.21E-13  | 0.030 | 2   | 13.0 | Q2 |
| IPI00872940; | RPL30  | 68.7 | 2.59E-194 | 0.030 | 8   | 7.1  | Q2 |
| IPI00329692; | NMT1   | 22.6 | 3.92E-123 | 0.030 | 8   | 10.7 | Q2 |
| IPI00008527; | RPLP1  | 74.6 | 4.38E-102 | 0.030 | 2   | 0.9  | Q2 |
| IPI00028083  | EIF2B2 | 5.1  | 2.76E-91  | 0.030 | 2   | 5.6  | Q2 |
| IPI00015361; | PFDN5  | 54.5 | 1.07E-196 | 0.030 | 2   | 11.3 | Q2 |
| IPI00219365; | MSN    | 75.6 | <1.0E-304 | 0.030 | 71  | 15.3 | Q2 |
| IPI00639841; | PECI   | 7.6  | 9.56E-27  | 0.030 | 3   | 15.2 | Q2 |
| IPI00409659; | UBQLN2 | 8.2  | 1.91E-124 | 0.030 | 2   | 12.4 | Q2 |
| IPI00011126; | PSMC1  | 28.6 | 7.34E-181 | 0.031 | 5   | 12.1 | Q2 |
| IPI00296053; | FH     | 37.6 | <1.0E-304 | 0.031 | 11  | 10.1 | Q2 |
| IPI00413344; | CFL2   | 45.8 | 2.57E-260 | 0.031 | 7   | 2.2  | Q2 |
| IPI00002535  | FKBP2  | 47.2 | 6.12E-94  | 0.031 | 3   | 3.3  | Q2 |
| IPI00008274; | CAP1   | 65.9 | <1.0E-304 | 0.031 | 50  | 13.5 | Q2 |
| IPI00293434; | SRP14  | 37.5 | 1.02E-50  | 0.031 | 7   | 5.6  | Q2 |
| IPI00645446; | MCTS1  | 46.7 | 9.97E-120 | 0.031 | 3   | 11.1 | Q2 |
| IPI00007752; | TUBB2C | 15.5 | <1.0E-304 | 0.031 | 14  | 6.7  | Q2 |

|              |          |      |           |       |     |       |    |
|--------------|----------|------|-----------|-------|-----|-------|----|
| IPI00296191; | ATP6V1H  | 33.1 | 1.51E-212 | 0.031 | 3   | 5.0   | Q2 |
| IPI00301609  | NEK9     | 17.1 | 5.68E-74  | 0.031 | 7   | 17.8  | Q2 |
| IPI00337386; | PRPF40A  | 8.6  | 5.49E-68  | 0.031 | 9   | 9.2   | Q2 |
| IPI00013415; | RPS7     | 67   | 5.38E-129 | 0.031 | 19  | 193.6 | Q2 |
| IPI00409671  | DDX42    | 16   | 7.44E-92  | 0.031 | 8   | 20.4  | Q2 |
| IPI00412224; | BRWD2    | 3.1  | 1.21E-17  | 0.031 | 2   | 7.5   | Q2 |
| IPI00807339; | COBLL1   | 2.8  | 5.62E-04  | 0.031 | 2   | 0.1   | Q2 |
| IPI00792352; | RAN      | 46.2 | 6.26E-214 | 0.032 | 21  | 17.7  | Q2 |
| IPI00301489; | UROD     | 25.1 | 5.28E-37  | 0.032 | 5   | 8.2   | Q2 |
| IPI00465028; | TPI1     | 74.1 | <1.0E-304 | 0.032 | 35  | 6.9   | Q2 |
| IPI00179438; | DAB2     | 26.6 | 1.22E-117 | 0.032 | 13  | 9.6   | Q2 |
| IPI00163505; | RBM39    | 19.4 | 2.68E-215 | 0.032 | 5   | 2.8   | Q2 |
| IPI00384051; | PSME2    | 46.6 | 5.91E-175 | 0.033 | 14  | 7.7   | Q2 |
| IPI00911038  | ACIN1    | 8.9  | 1.57E-54  | 0.033 | 2   | 3.0   | Q2 |
| IPI00871932; | SPTBN1   | 55.7 | <1.0E-304 | 0.033 | 148 | 10.6  | Q2 |
| IPI00003933; | HAGH     | 5.8  | 7.38E-04  | 0.034 | 2   | 9.8   | Q2 |
| IPI00006025; | SART3    | 15.9 | 1.59E-54  | 0.034 | 7   | 19.4  | Q2 |
| IPI00007061; | GOLT1B   | 10.9 | 1.89E-13  | 0.034 | 4   | 9.9   | Q2 |
| IPI00009790; | PFKP     | 45.7 | <1.0E-304 | 0.034 | 37  | 9.6   | Q2 |
| IPI00019427; | EXOC1    | 8.6  | 4.57E-27  | 0.034 | 3   | 18.7  | Q2 |
| IPI00290204; | SNRNP70  | 23.6 | 1.17E-35  | 0.034 | 7   | 13.2  | Q2 |
| IPI00894287  | HDLBP    | 1.4  | <1.0E-304 | 0.034 | 2   | 5.7   | Q2 |
| IPI00034159; | ATP6V0D1 | 21.4 | 7.08E-56  | 0.034 | 6   | 17.2  | Q2 |
| IPI00465294; | CDC5L    | 22.4 | 3.39E-98  | 0.034 | 8   | 12.3  | Q2 |
| IPI00913912; | ATXN10   | 20.3 | 9.32E-69  | 0.034 | 2   | 0.1   | Q2 |
| IPI00031397; | ACSL3    | 32.8 | 3.66E-284 | 0.034 | 12  | 30.0  | Q2 |
| IPI00026665; | QARS     | 50.7 | <1.0E-304 | 0.035 | 28  | 28.3  | Q2 |
| IPI00140420; | SND1     | 60.9 | <1.0E-304 | 0.035 | 80  | 8.5   | Q2 |
| IPI00007765; | HSPA9    | 52.6 | <1.0E-304 | 0.035 | 28  | 10.9  | Q2 |
| IPI00031821; | ITM2B    | 7.5  | 8.12E-05  | 0.035 | 2   | 14.2  | Q2 |
| IPI00295098; | SRPRB    | 63.5 | 5.49E-201 | 0.035 | 12  | 4.6   | Q2 |
| IPI00000494; | RPL5     | 43.1 | 1.80E-191 | 0.035 | 14  | 30.9  | Q2 |
| IPI00000948; | TBL2     | 26.2 | 2.60E-103 | 0.035 | 2   | 2.8   | Q2 |

|              |               |      |           |       |     |      |    |
|--------------|---------------|------|-----------|-------|-----|------|----|
| IPI00011253; | RPS3          | 81.9 | 3.74E-280 | 0.035 | 40  | 7.7  | Q2 |
| IPI00022774; | VCP           | 64.4 | <1.0E-304 | 0.035 | 75  | 11.1 | Q2 |
| IPI00297779; | CCT2          | 63.7 | <1.0E-304 | 0.035 | 14  | 18.6 | Q2 |
| IPI00304171; | H2AFY         | 37.1 | 1.53E-170 | 0.035 | 7   | 11.3 | Q2 |
| IPI00333215; | TCEA1         | 15   | 1.25E-33  | 0.035 | 2   | 14.0 | Q2 |
| IPI00410162; | TCEB2         | 43.5 | 4.90E-31  | 0.035 | 8   | 8.6  | Q2 |
| IPI00889541; | DDX17         | 37.6 | 5.93E-301 | 0.036 | 28  | 14.5 | Q2 |
| IPI00024993  | ECHS1         | 49.7 | 4.17E-299 | 0.036 | 6   | 44.0 | Q2 |
| IPI00879750; | SNRPD3        | 22.9 | 6.98E-13  | 0.036 | 4   | 4.4  | Q2 |
| IPI00013847; | UQCRC1        | 34.6 | 1.45E-123 | 0.036 | 8   | 6.2  | Q2 |
| IPI00011200; | PHGDH         | 39   | 1.79E-229 | 0.036 | 9   | 11.7 | Q2 |
| IPI00026781  | FASN          | 53.5 | <1.0E-304 | 0.036 | 228 | 12.0 | Q2 |
| IPI00023542  | TMED9         | 32.8 | 1.57E-85  | 0.036 | 10  | 8.3  | Q2 |
| IPI00031836; | DRG1          | 19.9 | 5.00E-75  | 0.036 | 3   | 10.6 | Q2 |
| IPI00221226; | ANXA6         | 81.7 | <1.0E-304 | 0.036 | 83  | 31.4 | Q2 |
| IPI00005969; | CAPZA1        | 49   | 2.14E-141 | 0.037 | 9   | 8.4  | Q2 |
| IPI00141318; | CKAP4         | 66.6 | <1.0E-304 | 0.037 | 45  | 24.0 | Q2 |
| IPI00016910; | EIF3C         | 30.2 | 1.39E-241 | 0.037 | 25  | 10.0 | Q2 |
| IPI00419373; | HNRNPA3       | 34.9 | 2.54E-266 | 0.037 | 9   | 18.2 | Q2 |
| IPI00003768; | PES1          | 8.2  | 6.69E-18  | 0.037 | 2   | 3.3  | Q2 |
| IPI00006980; | C14orf166     | 53.3 | 1.54E-169 | 0.037 | 6   | 4.3  | Q2 |
| IPI00844264; | DKFZp779B0247 | 29.8 | 1.94E-196 | 0.037 | 13  | 11.0 | Q2 |
| IPI00902584; | VASP          | 29.9 | 1.50E-97  | 0.037 | 10  | 17.4 | Q2 |
| IPI00012750; | RPS25         | 31.2 | 1.14E-32  | 0.037 | 7   | 4.5  | Q2 |
| IPI00005737; | SURF4         | 18.6 | 2.18E-148 | 0.038 | 45  | 41.8 | Q2 |
| IPI00296259; | TMED4         | 12.3 | 3.63E-59  | 0.038 | 3   | 1.6  | Q2 |
| IPI00005719; | RAB1A         | 69.8 | 1.01E-236 | 0.038 | 25  | 17.6 | Q2 |
| IPI00018768; | TSN           | 37.7 | 1.78E-24  | 0.038 | 5   | 6.3  | Q2 |
| IPI00549248; | NPM1          | 49.3 | <1.0E-304 | 0.038 | 25  | 7.6  | Q2 |
| IPI00005107; | NPC1          | 15.3 | 3.03E-152 | 0.038 | 25  | 42.9 | Q2 |
| IPI00045550; | PPP1R9B       | 4.7  | 1.52E-21  | 0.038 | 2   | 10.1 | Q2 |
| IPI00307162; | VCL           | 68.3 | <1.0E-304 | 0.038 | 138 | 10.6 | Q2 |
| IPI00218993; | HSPH1         | 39.8 | <1.0E-304 | 0.039 | 20  | 11.5 | Q2 |

|              |          |      |           |       |     |      |    |
|--------------|----------|------|-----------|-------|-----|------|----|
| IPI00827508; | RPL10A   | 51.6 | 3.22E-138 | 0.039 | 16  | 5.4  | Q2 |
| IPI00291928; | RAB14    | 62.8 | 8.07E-186 | 0.039 | 15  | 6.8  | Q2 |
| IPI00479997; | STMN1    | 63.1 | 2.38E-47  | 0.039 | 10  | 5.8  | Q2 |
| IPI00908469  | TUBB6    | 12.9 | <1.0E-304 | 0.039 | 6   | 2.5  | Q2 |
| IPI00021828  | CSTB     | 24.5 | 4.09E-29  | 0.039 | 3   | 5.3  | Q2 |
| IPI00001159; | GCN1L1   | 42.4 | <1.0E-304 | 0.039 | 80  | 15.2 | Q2 |
| IPI00023832; | SH3PXD2B | 11   | 2.03E-95  | 0.039 | 2   | 18.4 | Q2 |
| IPI00023860; | NAP1L1   | 27.4 | 1.48E-258 | 0.039 | 7   | 6.2  | Q2 |
| IPI00296526; | NAGK     | 51.3 | 2.48E-287 | 0.039 | 9   | 25.3 | Q2 |
| IPI00219037; | H2AFX    | 26.6 | 4.31E-121 | 0.040 | 4   | 24.8 | Q2 |
| IPI00748472; | KIAA0196 | 23.5 | 4.40E-182 | 0.040 | 22  | 18.2 | Q2 |
| IPI00021048; | MYOF     | 58.8 | <1.0E-304 | 0.040 | 145 | 14.2 | Q2 |
| IPI00873899; | ABCF1    | 15.7 | 2.60E-151 | 0.040 | 7   | 53.5 | Q2 |
| IPI00020599  | CALR     | 64.7 | <1.0E-304 | 0.040 | 48  | 7.1  | Q2 |
| IPI00218342; | MTHFD1   | 53.6 | <1.0E-304 | 0.040 | 57  | 9.5  | Q2 |
| IPI00014587; | CLTA     | 29.4 | 1.90E-122 | 0.041 | 8   | 21.1 | Q2 |
| IPI00872214; | TBCA     | 49.3 | 9.09E-34  | 0.041 | 2   | 4.0  | Q2 |
| IPI00020984; | CANX     | 41.6 | <1.0E-304 | 0.041 | 40  | 14.2 | Q2 |
| IPI00793375; | XPNPEP1  | 20   | 8.57E-144 | 0.041 | 7   | 7.1  | Q2 |
| IPI00008599; | EBP      | 16.5 | 1.66E-13  | 0.041 | 4   | 98.8 | Q2 |
| IPI00183626; | PTBP1    | 54.9 | <1.0E-304 | 0.041 | 21  | 9.0  | Q2 |
| IPI00031583; | USO1     | 34.8 | <1.0E-304 | 0.041 | 34  | 10.0 | Q2 |
| IPI00294536; | STRAP    | 56.5 | 1.20E-206 | 0.041 | 5   | 9.8  | Q2 |
| IPI00166010; | CNOT1    | 8.5  | 2.86E-53  | 0.042 | 5   | 5.4  | Q2 |
| IPI00221093; | RPS17    | 57   | 5.10E-166 | 0.042 | 8   | 5.7  | Q2 |
| IPI00000015; | SFRS4    | 7.9  | 1.95E-07  | 0.042 | 2   | 28.1 | Q2 |
| IPI00296909  | PARP4    | 19.3 | 7.42E-189 | 0.042 | 13  | 6.0  | Q2 |
| IPI00746655; | FAM62A   | 45.6 | <1.0E-304 | 0.042 | 65  | 23.3 | Q2 |
| IPI00219005  | FKBP4    | 26.8 | 5.92E-87  | 0.042 | 2   | 12.8 | Q2 |
| IPI00873622; | WDR1     | 56.5 | <1.0E-304 | 0.042 | 19  | 18.7 | Q2 |
| IPI00607591; | RAP1GDS1 | 40   | 3.93E-225 | 0.042 | 5   | 7.5  | Q2 |
| IPI00646917; | NUDT21   | 48.9 | 9.21E-160 | 0.042 | 7   | 5.1  | Q2 |
| IPI00018140; | SYNCRIP  | 41.1 | 3.64E-298 | 0.042 | 23  | 11.3 | Q2 |

|              |          |      |           |       |     |      |    |
|--------------|----------|------|-----------|-------|-----|------|----|
| IPI00022462; | TFRC     | 38.9 | 1.83E-276 | 0.042 | 31  | 16.1 | Q2 |
| IPI00026202; | RPL18A   | 46   | 6.17E-97  | 0.042 | 13  | 9.9  | Q2 |
| IPI00742743; | TP53BP1  | 8.8  | 1.07E-132 | 0.042 | 7   | 9.4  | Q2 |
| IPI00873403; | RPL24    | 28.9 | 8.02E-48  | 0.042 | 12  | 19.1 | Q2 |
| IPI00011603; | PSMD3    | 40.4 | 2.19E-253 | 0.043 | 15  | 9.2  | Q2 |
| IPI00017726; | HSD17B10 | 57.9 | <1.0E-304 | 0.043 | 14  | 14.0 | Q2 |
| IPI00026089; | SF3B1    | 36   | <1.0E-304 | 0.043 | 27  | 11.0 | Q2 |
| IPI00007155; | VPS28    | 26.2 | 4.27E-102 | 0.043 | 4   | 9.5  | Q2 |
| IPI00007334; | ACIN1    | 0.5  | 7.20E-34  | 0.043 | 2   | 0.3  | Q2 |
| IPI00102069; | EIF3M    | 31   | 1.16E-144 | 0.043 | 6   | 6.1  | Q2 |
| IPI00011274; | HNRPDL   | 16.7 | 8.34E-136 | 0.043 | 4   | 9.0  | Q2 |
| IPI00028946; | RTN3     | 15.3 | 6.46E-11  | 0.043 | 2   | 6.5  | Q2 |
| IPI00642259; | DST      | 13.1 | <1.0E-304 | 0.043 | 82  | 8.6  | Q2 |
| IPI00012837; | KIF5B    | 53   | <1.0E-304 | 0.043 | 47  | 7.8  | Q2 |
| IPI00220503; | DCTN2    | 42.6 | <1.0E-304 | 0.043 | 6   | 10.8 | Q2 |
| IPI00295851  | COPB1    | 43.8 | <1.0E-304 | 0.043 | 28  | 8.3  | Q2 |
| IPI00925052; | ARPC4    | 41.7 | 7.71E-42  | 0.043 | 6   | 7.1  | Q2 |
| IPI00038378; | ENOPH1   | 9.2  | 2.54E-20  | 0.043 | 2   | 22.2 | Q2 |
| IPI00377261; | FUBP3    | 20.1 | 1.08E-69  | 0.043 | 6   | 17.5 | Q2 |
| IPI00219155; | RPL27    | 55.1 | 4.37E-29  | 0.044 | 9   | 5.1  | Q2 |
| IPI00873222; | CCT4     | 61.6 | <1.0E-304 | 0.044 | 24  | 14.7 | Q2 |
| IPI00216046; | SMARCA1  | 6.8  | 1.37E-74  | 0.044 | 4   | 61.6 | Q2 |
| IPI00015944; | EML2     | 7.9  | 5.36E-24  | 0.044 | 2   | 11.2 | Q2 |
| IPI00396630; | PRKACA   | 26.5 | 3.31E-65  | 0.044 | 6   | 10.6 | Q2 |
| IPI00185374; | PSMD12   | 45.6 | 7.23E-166 | 0.045 | 9   | 9.6  | Q2 |
| IPI00640817; | AK1      | 50   | 2.51E-147 | 0.045 | 8   | 8.4  | Q2 |
| IPI00480142; | CUL4B    | 29.2 | 2.76E-124 | 0.045 | 17  | 12.9 | Q2 |
| IPI00221235; | NUP160   | 9.7  | 4.21E-101 | 0.045 | 2   | 10.7 | Q2 |
| IPI00640197; | TPP2     | 38.2 | <1.0E-304 | 0.045 | 26  | 22.1 | Q2 |
| IPI00006379; | NOP58    | 23.4 | 2.14E-153 | 0.046 | 7   | 7.0  | Q2 |
| IPI00011654; | TUBB     | 74.3 | <1.0E-304 | 0.046 | 143 | 23.5 | Q2 |
| IPI00550364  | PGM2     | 13.6 | 2.66E-28  | 0.046 | 5   | 22.5 | Q2 |
| IPI00027442; | AARS     | 49.7 | <1.0E-304 | 0.046 | 51  | 12.8 | Q2 |

|              |          |      |           |       |     |      |    |
|--------------|----------|------|-----------|-------|-----|------|----|
| IPI00027497; | GPI      | 43.7 | <1.0E-304 | 0.046 | 25  | 19.1 | Q2 |
| IPI00328715  | MTDH     | 16.5 | 9.43E-104 | 0.046 | 3   | 3.9  | Q2 |
| IPI00746360; | RIC8A    | 24.3 | 1.44E-109 | 0.046 | 8   | 9.1  | Q2 |
| IPI00396967; | FHL2     | 35.7 | 2.75E-134 | 0.046 | 4   | 9.9  | Q2 |
| IPI00647286; | C9orf88  | 36.7 | <1.0E-304 | 0.046 | 26  | 21.2 | Q2 |
| IPI00642971; | EEF1D    | 18.9 | 2.11E-186 | 0.046 | 18  | 12.8 | Q2 |
| IPI00009480; | COPS8    | 34.9 | 1.46E-117 | 0.047 | 3   | 5.1  | Q2 |
| IPI00014311; | CUL2     | 19.4 | 2.66E-79  | 0.047 | 5   | 22.5 | Q2 |
| IPI00215965; | HNRNPA1  | 43   | <1.0E-304 | 0.047 | 23  | 6.7  | Q2 |
| IPI00419979; | PAK2     | 26.7 | 4.48E-82  | 0.047 | 4   | 4.0  | Q2 |
| IPI00744706; | SPTAN1   | 61.9 | <1.0E-304 | 0.047 | 178 | 19.6 | Q2 |
| IPI00009364; | ORMDL1   | 21.6 | 1.41E-47  | 0.047 | 3   | 10.6 | Q2 |
| IPI00028091; | ACTR3    | 72.5 | 1.86E-300 | 0.047 | 24  | 14.6 | Q2 |
| IPI00013296; | RPS18    | 67.1 | 1.59E-81  | 0.047 | 14  | 7.1  | Q2 |
| IPI00024933; | RPL12    | 63.6 | 7.08E-204 | 0.047 | 11  | 8.4  | Q2 |
| IPI00655650; | RPS26    | 27   | 2.00E-33  | 0.047 | 3   | 4.1  | Q2 |
| IPI00297477; | SNRPA1   | 41.2 | 1.15E-81  | 0.048 | 6   | 12.1 | Q2 |
| IPI00790743; | RPL36AL  | 34.1 | 3.84E-12  | 0.048 | 6   | 14.5 | Q2 |
| IPI00002966; | HSPA4    | 52.7 | <1.0E-304 | 0.048 | 61  | 25.3 | Q2 |
| IPI00432363; | MACF1    | 6.2  | <1.0E-304 | 0.048 | 29  | 8.4  | Q2 |
| IPI00020672; | DPP3     | 40.4 | <1.0E-304 | 0.048 | 12  | 15.0 | Q2 |
| IPI00386114; | SF1      | 13.3 | 6.89E-48  | 0.048 | 2   | 7.9  | Q2 |
| IPI00015953; | DDX21    | 12.1 | 4.22E-34  | 0.048 | 7   | 11.2 | Q2 |
| IPI00914539; | ANKFY1   | 18.7 | 8.95E-109 | 0.048 | 10  | 26.0 | Q2 |
| IPI00009771; | LMNB2    | 51.1 | <1.0E-304 | 0.048 | 18  | 28.2 | Q2 |
| IPI00152377; | STT3B    | 8.6  | 8.12E-56  | 0.048 | 9   | 62.5 | Q2 |
| IPI00641107; | CAPZB    | 64.4 | 2.49E-211 | 0.048 | 18  | 9.2  | Q2 |
| IPI00748360  | KIAA1797 | 6.1  | 1.94E-26  | 0.048 | 3   | 7.2  | Q2 |
| IPI00015954; | SAR1A    | 48   | 2.42E-100 | 0.049 | 11  | 5.3  | Q2 |
| IPI00000690; | AIFM1    | 22.8 | 1.68E-106 | 0.049 | 4   | 6.5  | Q2 |
| IPI00012512; | RRAS2    | 15.2 | 6.07E-120 | 0.049 | 2   | 6.9  | Q2 |
| IPI00719680; | AP3D1    | 19.7 | 9.99E-208 | 0.049 | 16  | 11.1 | Q2 |
| IPI00293073; | MFN1     | 5.7  | 2.12E-46  | 0.049 | 2   | 10.3 | Q2 |



|              |          |      |           |       |     |      |    |
|--------------|----------|------|-----------|-------|-----|------|----|
| IPI00022648; | EIF5     | 27.8 | 1.83E-86  | 0.049 | 3   | 6.2  | Q2 |
| IPI00477313; | HNRNPC   | 38.2 | 1.89E-147 | 0.049 | 16  | 7.1  | Q2 |
| IPI00260715; | FUS      | 19.3 | 1.47E-215 | 0.049 | 7   | 12.0 | Q2 |
| IPI00012340; | SFRS9    | 22.6 | 9.15E-19  | 0.050 | 4   | 6.5  | Q2 |
| IPI00024067; | CLTC     | 69.2 | <1.0E-304 | 0.050 | 273 | 17.2 | Q2 |
| IPI00641950; | GNB2L1   | 68.2 | <1.0E-304 | 0.050 | 29  | 9.9  | Q2 |
| IPI00328318; | AGL      | 7.1  | 8.41E-92  | 0.050 | 3   | 16.5 | Q2 |
| IPI00184311; | ENPP1    | 3.9  | 2.44E-24  | 0.050 | 2   | 3.9  | Q2 |
| IPI00235412; | DNM1L    | 40   | <1.0E-304 | 0.050 | 15  | 10.1 | Q2 |
| IPI00396435  | DHX15    | 35.6 | 3.88E-163 | 0.051 | 14  | 8.8  | Q2 |
| IPI00218918; | ANXA1    | 77.2 | <1.0E-304 | 0.051 | 57  | 14.7 | Q2 |
| IPI00012442; | G3BP1    | 32   | 5.67E-228 | 0.051 | 15  | 8.6  | Q2 |
| IPI00329482; | LAMA4    | 7.6  | 1.11E-142 | 0.051 | 7   | 12.2 | Q2 |
| IPI00646015; | ACOT9    | 9.8  | 3.29E-05  | 0.051 | 3   | 10.6 | Q2 |
| IPI00871815; | LNPEP    | 17.1 | 7.84E-111 | 0.052 | 8   | 16.8 | Q2 |
| IPI00005158; | LONP1    | 26.6 | 7.53E-273 | 0.052 | 12  | 29.3 | Q2 |
| IPI00025491; | EIF4A1   | 69.2 | <1.0E-304 | 0.052 | 40  | 20.6 | Q2 |
| IPI00096066; | SUCLG2   | 22   | 2.14E-179 | 0.052 | 3   | 6.7  | Q2 |
| IPI00232533; | EIF1AX   | 34   | 8.97E-17  | 0.052 | 3   | 4.6  | Q2 |
| IPI00300371; | SF3B3    | 27.4 | <1.0E-304 | 0.052 | 29  | 8.7  | Q2 |
| IPI00844214; | CTNNB1   | 8.9  | 3.16E-13  | 0.052 | 2   | 13.0 | Q2 |
| IPI00017763; | NAP1L4   | 35   | 1.52E-222 | 0.052 | 10  | 7.7  | Q2 |
| IPI00305068  | PRPF6    | 13.8 | 1.13E-96  | 0.052 | 4   | 7.6  | Q2 |
| IPI00549389; | METTL11A | 19.6 | 2.44E-62  | 0.052 | 3   | 3.3  | Q2 |
| IPI00376798; | RPL11    | 39.3 | 7.85E-75  | 0.053 | 8   | 7.6  | Q2 |
| IPI00410693; | SERBP1   | 37.7 | 2.82E-152 | 0.053 | 13  | 14.7 | Q2 |
| IPI00413108; | RPSA     | 56.7 | <1.0E-304 | 0.053 | 31  | 32.6 | Q2 |
| IPI00550234; | ARPC5    | 58.3 | 2.38E-44  | 0.053 | 5   | 3.3  | Q2 |
| IPI00550854; | MXRA8    | 18.8 | 1.56E-77  | 0.053 | 7   | 7.7  | Q2 |
| IPI00219678; | EIF2S1   | 50.5 | 5.25E-106 | 0.053 | 6   | 15.2 | Q2 |
| IPI00012069; | NQO1     | 36.9 | 2.41E-101 | 0.053 | 11  | 12.4 | Q2 |
| IPI00074587; | FUSIP1   | 17.2 | 1.02E-69  | 0.053 | 5   | 4.3  | Q2 |
| IPI00465248; | ENO1     | 81.8 | <1.0E-304 | 0.053 | 81  | 14.3 | Q2 |

|              |          |      |           |       |     |      |    |
|--------------|----------|------|-----------|-------|-----|------|----|
| IPI00012268; | PSMD2    | 45.5 | <1.0E-304 | 0.053 | 26  | 12.1 | Q2 |
| IPI00844000; | KIAA0776 | 34.3 | 9.36E-201 | 0.054 | 13  | 12.6 | Q2 |
| IPI00301263; | CAD      | 22.7 | <1.0E-304 | 0.054 | 31  | 8.9  | Q2 |
| IPI00025273; | GART     | 35.5 | 5.33E-257 | 0.054 | 19  | 28.6 | Q2 |
| IPI00914566; | FDPS     | 16.2 | 1.33E-20  | 0.054 | 8   | 4.9  | Q2 |
| IPI00007927; | SMC2     | 8.4  | 5.55E-35  | 0.054 | 4   | 8.7  | Q2 |
| IPI00008711  | WFS1     | 6.7  | 8.72E-10  | 0.054 | 2   | 6.6  | Q2 |
| IPI00001639; | KPNB1    | 43.7 | <1.0E-304 | 0.055 | 35  | 9.1  | Q2 |
| IPI00061525; | GNPNAT1  | 29.3 | 3.17E-113 | 0.055 | 3   | 13.0 | Q2 |
| IPI00455210; | CHD4     | 13.1 | 1.46E-175 | 0.055 | 10  | 64.0 | Q2 |
| IPI00014577; | RAB18    | 50.5 | 4.09E-114 | 0.055 | 8   | 7.7  | Q2 |
| IPI00550239  | H1FO     | 27.8 | 1.16E-21  | 0.055 | 4   | 4.4  | Q2 |
| IPI00004839  | CRKL     | 29   | 4.02E-86  | 0.055 | 4   | 9.0  | Q2 |
| IPI00221106; | SF3B2    | 24.9 | 3.77E-97  | 0.055 | 20  | 6.2  | Q2 |
| IPI00872430; | RPS8     | 55.3 | 2.38E-186 | 0.055 | 18  | 7.3  | Q2 |
| IPI00644079; | HNRNPU   | 39.4 | <1.0E-304 | 0.055 | 57  | 11.7 | Q2 |
| IPI00013070; | HNRNPUL1 | 21.4 | 1.23E-140 | 0.056 | 6   | 16.7 | Q2 |
| IPI00644674; | NUBP2    | 27.3 | 2.21E-23  | 0.056 | 4   | 1.5  | Q2 |
| IPI00102685; | MYADM    | 12.1 | 3.34E-61  | 0.056 | 9   | 42.0 | Q2 |
| IPI00220766  | GLO1     | 51.1 | 8.26E-127 | 0.056 | 9   | 9.5  | Q2 |
| IPI00032342; | TRIP12   | 2.2  | 1.63E-29  | 0.056 | 4   | 15.7 | Q2 |
| IPI00219078; | ATP2A2   | 33   | <1.0E-304 | 0.056 | 37  | 48.1 | Q2 |
| IPI00105598; | PSMD11   | 53.7 | 4.88E-158 | 0.056 | 9   | 7.0  | Q2 |
| IPI00186290; | EEF2     | 63.9 | <1.0E-304 | 0.056 | 125 | 14.6 | Q2 |
| IPI00916757; | DCTN1    | 37.6 | <1.0E-304 | 0.056 | 33  | 13.3 | Q2 |
| IPI00382470; | HSP90AA1 | 51.6 | <1.0E-304 | 0.057 | 108 | 13.0 | Q2 |
| IPI00853598; | SEC13    | 35.1 | <1.0E-304 | 0.057 | 6   | 5.4  | Q2 |
| IPI00910513; | GSPT1    | 38   | 4.73E-80  | 0.057 | 10  | 9.7  | Q2 |
| IPI00029623; | PSMA6    | 52.8 | 1.69E-167 | 0.057 | 12  | 4.1  | Q2 |
| IPI00291510; | IMPDH2   | 27.2 | 1.89E-253 | 0.057 | 8   | 4.8  | Q2 |
| IPI00298058; | SUPT5H   | 10.6 | 3.52E-94  | 0.057 | 6   | 14.4 | Q2 |
| IPI00304612; | RPL13A   | 44.3 | 8.73E-61  | 0.057 | 16  | 21.1 | Q2 |
| IPI00030968  | C9orf142 | 14.7 | 4.72E-14  | 0.057 | 2   | 5.1  | Q2 |

|              |          |      |           |       |     |      |    |
|--------------|----------|------|-----------|-------|-----|------|----|
| IPI00013184; | ARD1A    | 34.5 | 2.82E-68  | 0.057 | 5   | 7.7  | Q2 |
| IPI00023598; | TUBB4    | 9.7  | <1.0E-304 | 0.057 | 10  | 85.5 | Q2 |
| IPI00419258; | HMGB1    | 51.6 | 1.16E-227 | 0.057 | 14  | 6.2  | Q2 |
| IPI00018522; | PRMT1    | 42.9 | 1.98E-154 | 0.057 | 7   | 8.0  | Q2 |
| IPI00021435; | PSMC2    | 58.7 | 9.02E-230 | 0.057 | 11  | 9.7  | Q2 |
| IPI00219445; | PSME3    | 24.7 | 1.46E-75  | 0.057 | 5   | 5.1  | Q2 |
| IPI00555744; | RPL14    | 37.3 | 2.81E-152 | 0.058 | 15  | 20.1 | Q2 |
| IPI00644386; | FUBP1    | 34.5 | 2.13E-254 | 0.058 | 9   | 62.0 | Q2 |
| IPI00004962; | GOLIM4   | 13.1 | 3.84E-53  | 0.058 | 6   | 5.0  | Q2 |
| IPI00329791  | DDX46    | 16.9 | 1.51E-95  | 0.058 | 12  | 8.6  | Q2 |
| IPI00784366; | AP2B1    | 51.4 | <1.0E-304 | 0.058 | 38  | 13.3 | Q2 |
| IPI00004324; | TRAPPC3  | 22.2 | 2.28E-13  | 0.058 | 4   | 14.8 | Q2 |
| IPI00013774; | HDAC1    | 17   | 1.97E-48  | 0.058 | 2   | 3.1  | Q2 |
| IPI00016249; | FXR1     | 16.4 | 1.52E-85  | 0.058 | 10  | 17.5 | Q2 |
| IPI00021187; | RUVBL1   | 35.7 | 3.87E-222 | 0.058 | 7   | 8.1  | Q2 |
| IPI00790214; | RCN2     | 18.8 | 4.01E-166 | 0.058 | 3   | 3.6  | Q2 |
| IPI00002557; | COPG2    | 18.3 | 6.13E-213 | 0.059 | 7   | 9.1  | Q2 |
| IPI00025091; | RPS11    | 62   | 4.37E-53  | 0.059 | 16  | 5.5  | Q2 |
| IPI00396171; | MAP4     | 49.7 | <1.0E-304 | 0.059 | 64  | 9.6  | Q2 |
| IPI00397904; | NUP93    | 29.5 | 4.30E-236 | 0.059 | 9   | 23.2 | Q2 |
| IPI00927614; | GOLGA4   | 11.3 | 2.30E-86  | 0.059 | 14  | 52.0 | Q2 |
| IPI00295940; | UNC84B   | 20.6 | 1.95E-249 | 0.059 | 7   | 18.2 | Q2 |
| IPI00917650; | FAM38A   | 2.2  | 1.24E-34  | 0.059 | 2   | 24.1 | Q2 |
| IPI00027681  | NNMT     | 45.1 | 2.07E-134 | 0.060 | 17  | 7.8  | Q2 |
| IPI00011592; | DYNC1LI2 | 24   | 3.33E-260 | 0.060 | 6   | 7.5  | Q2 |
| IPI00554590; | RAB3GAP2 | 15.5 | 1.07E-39  | 0.060 | 7   | 6.8  | Q2 |
| IPI00001960; | CLIC4    | 85.4 | <1.0E-304 | 0.060 | 27  | 7.9  | Q2 |
| IPI00005160; | ARPC1B   | 43.8 | 1.04E-154 | 0.061 | 9   | 7.6  | Q2 |
| IPI00032561; | CAB39    | 19.4 | 1.94E-17  | 0.061 | 3   | 9.7  | Q2 |
| IPI00178352; | FLNC     | 58.5 | <1.0E-304 | 0.061 | 306 | 14.2 | Q2 |
| IPI00010414  | PDLIM1   | 50.8 | 2.08E-262 | 0.061 | 8   | 5.8  | Q2 |
| IPI00014310; | CUL1     | 23.7 | 4.92E-113 | 0.061 | 4   | 6.3  | Q2 |
| IPI00852741; | SEC31A   | 28.1 | 4.10E-275 | 0.061 | 45  | 12.0 | Q2 |

|              |          |      |           |       |     |      |    |
|--------------|----------|------|-----------|-------|-----|------|----|
| IPI00168388; | SRP68    | 30.1 | 5.88E-115 | 0.062 | 6   | 7.2  | Q2 |
| IPI00021924  | H1FX     | 26.3 | 6.68E-89  | 0.062 | 5   | 8.4  | Q2 |
| IPI00000877; | HYOU1    | 46.8 | <1.0E-304 | 0.062 | 43  | 11.9 | Q2 |
| IPI00009342  | IQGAP1   | 67.7 | <1.0E-304 | 0.062 | 178 | 11.7 | Q2 |
| IPI00031691; | RPL9     | 59.9 | 2.66E-170 | 0.062 | 15  | 6.7  | Q2 |
| IPI00644127; | IARS     | 43.9 | <1.0E-304 | 0.062 | 58  | 10.9 | Q2 |
| IPI00789101; | PTGES3   | 37.6 | 6.24E-69  | 0.063 | 5   | 5.3  | Q2 |
| IPI00218729; | DLG1     | 4.6  | 2.48E-13  | 0.063 | 2   | 8.9  | Q2 |
| IPI00013290; | HDGFRP2  | 7.5  | 1.44E-55  | 0.063 | 3   | 18.5 | Q2 |
| IPI00399089  | MESDC2   | 36.3 | 1.25E-30  | 0.063 | 4   | 11.3 | Q2 |
| IPI00641743; | HCFC1    | 4.3  | 1.01E-22  | 0.063 | 5   | 15.9 | Q2 |
| IPI00019380; | NCBP1    | 6.6  | 7.88E-21  | 0.063 | 2   | 2.1  | Q2 |
| IPI00760715; | CAST     | 44.8 | <1.0E-304 | 0.063 | 23  | 10.7 | Q2 |
| IPI00384689; | PDXDC1   | 16.9 | 5.21E-187 | 0.063 | 7   | 15.9 | Q2 |
| IPI00413578; | TPRG1L   | 7    | 3.88E-04  | 0.064 | 2   | 4.4  | Q2 |
| IPI00925713; | RPL10    | 48.3 | 3.71E-127 | 0.064 | 18  | 7.1  | Q2 |
| IPI00021263; | YWHAZ    | 69.8 | <1.0E-304 | 0.064 | 39  | 7.0  | Q2 |
| IPI00000875; | EEF1G    | 43.7 | 6.97E-168 | 0.064 | 26  | 65.9 | Q2 |
| IPI00008964; | RAB1B    | 31.3 | 6.94E-218 | 0.064 | 6   | 4.4  | Q2 |
| IPI00883896  | LIMA1    | 37.6 | <1.0E-304 | 0.064 | 26  | 9.4  | Q2 |
| IPI00218019; | BSG      | 22.9 | 4.78E-101 | 0.064 | 7   | 13.6 | Q2 |
| IPI00165949; | ERAP1    | 18.6 | 2.92E-112 | 0.065 | 11  | 7.6  | Q2 |
| IPI00307547  | C9orf46  | 12.9 | 2.09E-05  | 0.065 | 2   | 2.8  | Q2 |
| IPI00010896; | CLIC1    | 68.5 | 2.86E-304 | 0.065 | 21  | 5.4  | Q2 |
| IPI00014808  | PAFAH1B3 | 7.8  | 4.46E-05  | 0.066 | 2   | 3.6  | Q2 |
| IPI00178431; | RECQL    | 18.6 | 4.80E-80  | 0.066 | 7   | 20.2 | Q2 |
| IPI00013917; | RPS12    | 70.5 | 6.61E-197 | 0.066 | 10  | 3.9  | Q2 |
| IPI00022597  | UBE2M    | 35.5 | 5.42E-80  | 0.066 | 4   | 5.0  | Q2 |
| IPI00294495  | UFC1     | 19.8 | 1.89E-04  | 0.066 | 3   | 0.1  | Q2 |
| IPI00005715; | UBE4B    | 3.1  | 1.34E-03  | 0.067 | 2   | 19.2 | Q2 |
| IPI00243221; | NRD1     | 15.3 | 4.66E-117 | 0.067 | 12  | 10.0 | Q2 |
| IPI00383046  | CMBL     | 19.6 | 1.51E-09  | 0.067 | 3   | 12.7 | Q2 |
| IPI00025019; | PSMB1    | 51.5 | 2.22E-234 | 0.067 | 18  | 9.1  | Q2 |

|              |         |      |           |       |     |      |    |
|--------------|---------|------|-----------|-------|-----|------|----|
| IPI00465132; | COPE    | 52.9 | <1.0E-304 | 0.067 | 10  | 11.4 | Q2 |
| IPI00553067; | CCDC132 | 5.9  | 4.15E-69  | 0.068 | 2   | 6.3  | Q2 |
| IPI00873982; | MYH11   | 0.7  | <1.0E-304 | 0.068 | 2   | 8.6  | Q2 |
| IPI00926977; | PSMC6   | 49.1 | 2.32E-262 | 0.068 | 9   | 52.0 | Q2 |
| IPI00550451; | PPP1CA  | 51.2 | <1.0E-304 | 0.068 | 11  | 27.0 | Q2 |
| IPI00185146  | IPO9    | 26.5 | <1.0E-304 | 0.069 | 16  | 10.2 | Q2 |
| IPI00003918; | RPL4    | 46.6 | 1.77E-299 | 0.069 | 22  | 5.8  | Q2 |
| IPI00219861; | ACP1    | 27.2 | 9.01E-34  | 0.069 | 4   | 6.7  | Q2 |
| IPI00307200  | SWAP70  | 29.2 | 3.14E-61  | 0.069 | 9   | 7.1  | Q2 |
| IPI00239077; | HINT1   | 58.7 | 5.38E-71  | 0.069 | 5   | 6.9  | Q2 |
| IPI00216691; | PFN1    | 91.4 | <1.0E-304 | 0.069 | 35  | 24.0 | Q2 |
| IPI00221092; | RPS16   | 69.2 | 1.88E-46  | 0.069 | 14  | 30.0 | Q2 |
| IPI00760846; | MYO18A  | 4.6  | 2.28E-26  | 0.069 | 3   | 3.3  | Q2 |
| IPI00014238; | KARS    | 37   | 3.49E-167 | 0.069 | 10  | 5.5  | Q2 |
| IPI00647650; | EIF3H   | 29.8 | 1.80E-48  | 0.069 | 6   | 9.6  | Q2 |
| IPI00293533  | NUP62   | 15.3 | 3.27E-140 | 0.069 | 3   | 7.6  | Q2 |
| IPI00783982; | COPG    | 52.7 | <1.0E-304 | 0.069 | 30  | 11.0 | Q2 |
| IPI00009274  | COPZ2   | 18.6 | 2.23E-96  | 0.070 | 2   | 11.7 | Q2 |
| IPI00013297; | PDAP1   | 37.6 | 3.83E-129 | 0.070 | 5   | 8.5  | Q2 |
| IPI00298851  | CD151   | 9.1  | 6.18E-03  | 0.070 | 8   | 4.5  | Q2 |
| IPI00028006; | PSMB2   | 55.7 | 5.14E-142 | 0.070 | 6   | 7.5  | Q2 |
| IPI00219018; | GAPDH   | 84.8 | <1.0E-304 | 0.070 | 120 | 19.9 | Q2 |
| IPI00007074  | YARS    | 50.9 | 2.43E-171 | 0.070 | 14  | 12.5 | Q2 |
| IPI00154603  | FGF2    | 6.2  | 1.16E-03  | 0.070 | 2   | 3.4  | Q2 |
| IPI00295457; | MPRIP   | 36.4 | 1.30E-257 | 0.071 | 13  | 11.8 | Q2 |
| IPI00010845; | NDUFS8  | 14.8 | 2.98E-09  | 0.071 | 4   | 7.0  | Q2 |
| IPI00012490; | ATP2B4  | 36.5 | <1.0E-304 | 0.071 | 49  | 38.8 | Q2 |
| IPI00163230; | COPS6   | 21.1 | 4.80E-25  | 0.071 | 4   | 1.7  | Q2 |
| IPI00307259; | DNAJC13 | 26.4 | <1.0E-304 | 0.071 | 26  | 9.2  | Q2 |
| IPI00413324; | RPL17   | 37.5 | 1.06E-26  | 0.071 | 9   | 8.4  | Q2 |
| IPI00219616; | PRPS1   | 28.9 | 6.85E-53  | 0.071 | 4   | 8.0  | Q2 |
| IPI00374657; | VAPA    | 38.1 | 7.59E-103 | 0.071 | 10  | 6.9  | Q2 |
| IPI00005401  | GALNT5  | 3.9  | 6.08E-15  | 0.071 | 2   | 6.9  | Q2 |

|              |            |      |           |       |     |      |    |
|--------------|------------|------|-----------|-------|-----|------|----|
| IPI00295400; | WARS       | 60.5 | <1.0E-304 | 0.071 | 9   | 6.0  | Q2 |
| IPI00013004; | PDXK       | 42   | 1.48E-267 | 0.071 | 9   | 17.7 | Q2 |
| IPI00429191  | ETF1       | 28.4 | 5.03E-93  | 0.071 | 6   | 10.7 | Q2 |
| IPI00034049; | UPF1       | 37.7 | 5.12E-257 | 0.072 | 29  | 7.2  | Q2 |
| IPI00008433; | RPS5       | 51   | 1.47E-269 | 0.072 | 15  | 7.6  | Q2 |
| IPI00013485; | RPS2       | 46.1 | 2.94E-114 | 0.072 | 25  | 9.4  | Q2 |
| IPI00013683; | TUBB3      | 27.6 | <1.0E-304 | 0.072 | 11  | 11.2 | Q2 |
| IPI00293946; | UBXN4      | 9.1  | 2.25E-83  | 0.072 | 2   | 4.9  | Q2 |
| IPI00219622; | PSMA2      | 56.8 | 1.49E-274 | 0.072 | 11  | 6.1  | Q2 |
| IPI00290452; | TMBIM1     | 4.5  | 2.02E-36  | 0.072 | 3   | 12.3 | Q2 |
| IPI00291922  | PSMA5      | 52.7 | 3.67E-204 | 0.072 | 10  | 10.4 | Q2 |
| IPI00337397; | NUP98      | 8.7  | 4.80E-78  | 0.072 | 4   | 13.7 | Q2 |
| IPI00794956; | SCFD1      | 30.8 | <1.0E-304 | 0.073 | 10  | 6.2  | Q2 |
| IPI00011876; | MTAP       | 41   | 1.86E-187 | 0.073 | 6   | 8.2  | Q2 |
| IPI00297982; | EIF2S3     | 41.3 | 1.31E-272 | 0.073 | 5   | 4.7  | Q2 |
| IPI00414676; | HSP90AB1   | 34.1 | <1.0E-304 | 0.073 | 75  | 5.6  | Q2 |
| IPI00000728; | USP15      | 10.2 | 7.70E-25  | 0.073 | 4   | 16.0 | Q2 |
| IPI00015077; | EIF1       | 29.2 | 2.38E-77  | 0.073 | 2   | 5.5  | Q2 |
| IPI00031519; | DNMT1      | 4.1  | 3.56E-46  | 0.073 | 3   | 4.6  | Q2 |
| IPI00004860; | RARS       | 40.6 | 2.07E-300 | 0.074 | 18  | 16.4 | Q2 |
| IPI00216457; | HIST2H2AA3 | 57.7 | 5.23E-164 | 0.074 | 17  | 28.7 | Q2 |
| IPI00013862; | DTYMK      | 36.8 | 1.33E-44  | 0.074 | 6   | 5.4  | Q2 |
| IPI00017292; | CTNNB1     | 36.9 | <1.0E-304 | 0.074 | 16  | 9.2  | Q2 |
| IPI00300127; | NAT10      | 10   | 8.78E-38  | 0.074 | 4   | 4.9  | Q2 |
| IPI00018783; | ITPA       | 22.2 | 1.49E-48  | 0.074 | 3   | 5.4  | Q2 |
| IPI00798102; | VPS29      | 33.6 | 3.43E-38  | 0.074 | 7   | 8.0  | Q2 |
| IPI00015195; | CSTF3      | 11.3 | 9.45E-150 | 0.074 | 2   | 8.5  | Q2 |
| IPI00290566; | CCT1       | 68.2 | <1.0E-304 | 0.074 | 22  | 8.5  | Q2 |
| IPI00021700  | PCNA       | 58.6 | 5.39E-192 | 0.075 | 14  | 9.2  | Q2 |
| IPI00908949; | TARS       | 49.6 | <1.0E-304 | 0.075 | 25  | 11.0 | Q2 |
| IPI00640703; | XPO5       | 2.8  | 1.28E-10  | 0.075 | 2   | 18.2 | Q2 |
| IPI00027230; | HSP90B1    | 65.5 | <1.0E-304 | 0.075 | 132 | 11.7 | Q2 |
| IPI00658152; | TNS3       | 13.6 | 6.47E-273 | 0.075 | 9   | 15.0 | Q2 |

|              |          |      |           |       |    |      |    |
|--------------|----------|------|-----------|-------|----|------|----|
| IPI00021954  | GBF1     | 11.2 | 6.24E-142 | 0.075 | 13 | 15.4 | Q2 |
| IPI00030706  | AHSA1    | 26.6 | 2.31E-87  | 0.075 | 3  | 2.0  | Q2 |
| IPI00219953; | CMPK1    | 46.1 | 4.87E-273 | 0.075 | 12 | 5.9  | Q2 |
| IPI00329662; | FAM114A2 | 11.9 | 5.07E-15  | 0.075 | 3  | 16.4 | Q2 |
| IPI00337495; | PLOD2    | 25.5 | 2.82E-116 | 0.075 | 6  | 13.9 | Q2 |
| IPI00449049; | PARP1    | 27.1 | 3.42E-161 | 0.075 | 13 | 7.1  | Q2 |
| IPI00007935; | PDLIM5   | 37.8 | 5.02E-112 | 0.075 | 16 | 5.8  | Q2 |
| IPI00292953; | RAI14    | 36.1 | 4.56E-225 | 0.076 | 31 | 9.4  | Q2 |
| IPI00221012; | USP9X    | 13.2 | 7.90E-145 | 0.076 | 13 | 11.8 | Q2 |
| IPI00007694; | PPME1    | 17.4 | 4.21E-24  | 0.076 | 3  | 7.7  | Q2 |
| IPI00029048; | TTLL12   | 20.2 | 1.48E-112 | 0.076 | 2  | 17.6 | Q2 |
| IPI00178440; | EEF1B2   | 32.9 | 1.23E-146 | 0.076 | 6  | 5.5  | Q2 |
| IPI00009235  | SSR3     | 7.1  | 1.31E-18  | 0.076 | 3  | 80.9 | Q2 |
| IPI00291467; | SLC25A6  | 64.1 | 7.31E-173 | 0.076 | 41 | 50.8 | Q2 |
| IPI00305212; | COMMD9   | 22.7 | 1.44E-58  | 0.077 | 3  | 31.2 | Q2 |
| IPI00003377; | SFRS7    | 19.3 | 1.10E-52  | 0.077 | 3  | 5.7  | Q2 |
| IPI00015102; | ALCAM    | 25.2 | 9.58E-171 | 0.077 | 7  | 10.6 | Q2 |
| IPI00008438; | RPS10    | 46.7 | 1.68E-146 | 0.077 | 10 | 6.1  | Q2 |
| IPI00017592; | LETM1    | 22.1 | 8.37E-122 | 0.077 | 2  | 24.7 | Q2 |
| IPI00296830; | LUZP1    | 7.9  | 1.36E-51  | 0.078 | 3  | 3.7  | Q2 |
| IPI00018465; | CCT7     | 65.6 | <1.0E-304 | 0.078 | 18 | 4.9  | Q2 |
| IPI00009659; | RPRD1B   | 13.8 | 6.84E-19  | 0.078 | 2  | 0.1  | Q2 |
| IPI00646493; | COPA     | 57.1 | <1.0E-304 | 0.078 | 90 | 15.4 | Q2 |
| IPI00003327  | ARL3     | 37.9 | 1.01E-67  | 0.078 | 5  | 23.5 | Q2 |
| IPI00185919; | LARP1    | 18.9 | 1.11E-98  | 0.078 | 10 | 9.7  | Q2 |
| IPI00290462  | CBR3     | 32.9 | 8.12E-162 | 0.078 | 6  | 8.7  | Q2 |
| IPI00477495; | H2BFS    | 58.7 | 6.89E-74  | 0.078 | 35 | 23.8 | Q2 |
| IPI00014439; | QDPR     | 34.8 | 7.79E-82  | 0.078 | 5  | 2.7  | Q2 |
| IPI00910170; | RAB3A    | 14   | 7.00E-76  | 0.078 | 3  | 2.8  | Q2 |
| IPI00018349; | MCM4     | 19   | 4.11E-99  | 0.079 | 8  | 68.9 | Q2 |
| IPI00419880; | RPS3A    | 61.7 | 3.44E-191 | 0.079 | 35 | 32.8 | Q2 |
| IPI00647400  | RNPEP    | 5.1  | 7.96E-224 | 0.079 | 3  | 4.7  | Q2 |
| IPI00008728  | CLPX     | 5.8  | 4.28E-28  | 0.079 | 2  | 8.4  | Q2 |

|              |          |      |           |       |    |       |    |
|--------------|----------|------|-----------|-------|----|-------|----|
| IPI00221300; | EIF2B1   | 22   | 3.71E-53  | 0.079 | 3  | 20.8  | Q2 |
| IPI00513761; | RP3      | 24.6 | 7.27E-144 | 0.079 | 3  | 7.4   | Q2 |
| IPI00553185; | CCT3     | 58.3 | <1.0E-304 | 0.080 | 29 | 13.4  | Q2 |
| IPI00305010; | CPPED1   | 24.5 | 1.55E-73  | 0.080 | 4  | 0.8   | Q2 |
| IPI00293026; | EFTUD1   | 9.2  | 2.41E-50  | 0.080 | 5  | 14.4  | Q2 |
| IPI00794402; | ARHGDI A | 47.8 | 5.69E-293 | 0.080 | 15 | 8.9   | Q2 |
| IPI00104050; | THRAP3   | 24.3 | 6.18E-105 | 0.080 | 17 | 12.2  | Q2 |
| IPI00008529; | RPLP2    | 77.4 | <1.0E-304 | 0.080 | 4  | 4.9   | Q2 |
| IPI00643591; | AP1G1    | 34.7 | 1.81E-149 | 0.081 | 7  | 9.2   | Q2 |
| IPI00008494; | ICAM1    | 18.8 | 3.11E-82  | 0.081 | 7  | 5.6   | Q2 |
| IPI00023919; | PSMC5    | 47.5 | 5.17E-229 | 0.081 | 8  | 5.8   | Q2 |
| IPI00031410; | FRAP1    | 4.6  | 5.57E-40  | 0.081 | 4  | 10.8  | Q2 |
| IPI00218914; | ALDH1A1  | 68.5 | <1.0E-304 | 0.081 | 49 | 6.5   | Q2 |
| IPI00867509; | CORO1C   | 46.5 | 4.58E-280 | 0.082 | 24 | 13.3  | Q2 |
| IPI00003802  | MAN2A1   | 8.6  | 3.63E-57  | 0.082 | 6  | 129.2 | Q2 |
| IPI00013183; | UBA7     | 10.1 | 2.08E-64  | 0.082 | 3  | 1.4   | Q2 |
| IPI00382412; | BCAT1    | 12.8 | 4.21E-28  | 0.082 | 3  | 18.1  | Q2 |
| IPI00019927  | PSMD7    | 26.2 | 1.42E-156 | 0.082 | 3  | 4.0   | Q2 |
| IPI00216247; | PSMD4    | 16.8 | 1.12E-61  | 0.082 | 3  | 5.3   | Q2 |
| IPI00794613; | TBC1D15  | 11.6 | 1.61E-54  | 0.082 | 3  | 8.9   | Q2 |
| IPI00010800  | NES      | 34.9 | <1.0E-304 | 0.082 | 53 | 15.0  | Q2 |
| IPI00604620; | NCL      | 38.7 | <1.0E-304 | 0.082 | 43 | 23.8  | Q2 |
| IPI00008234; | CYB5R2   | 33   | 1.94E-17  | 0.082 | 7  | 18.2  | Q2 |
| IPI00007321; | LYPLA1   | 12.5 | 7.53E-21  | 0.083 | 3  | 8.9   | Q2 |
| IPI00784808; | SEPT9    | 54.2 | <1.0E-304 | 0.083 | 13 | 11.0  | Q2 |
| IPI00219097  | HMGB2    | 23.4 | 1.49E-63  | 0.083 | 4  | 5.5   | Q2 |
| IPI00419194; | IAH1     | 14.1 | 3.05E-04  | 0.083 | 2  | 5.8   | Q2 |
| IPI00027270; | RPL26    | 41.4 | 8.82E-16  | 0.083 | 11 | 7.2   | Q2 |
| IPI00003865; | HSPA8    | 57   | <1.0E-304 | 0.084 | 83 | 11.2  | Q2 |
| IPI00029468; | ACTR1A   | 48.1 | <1.0E-304 | 0.084 | 10 | 15.3  | Q2 |
| IPI00026833  | ADSS     | 17.8 | 4.54E-91  | 0.084 | 5  | 16.8  | Q2 |
| IPI00007402  | IPO7     | 25.7 | <1.0E-304 | 0.084 | 18 | 4.8   | Q2 |
| IPI00030328  | SRR      | 13.8 | 3.11E-63  | 0.085 | 2  | 3.6   | Q2 |



|              |         |      |           |       |    |      |    |
|--------------|---------|------|-----------|-------|----|------|----|
| IPI00398798  | H2AFV   | 57.8 | 1.42E-25  | 0.085 | 3  | 6.0  | Q2 |
| IPI00029737; | ACSL4   | 15.8 | 4.07E-170 | 0.085 | 5  | 5.0  | Q2 |
| IPI00012772; | RPL8    | 26.8 | 8.13E-50  | 0.086 | 5  | 5.4  | Q2 |
| IPI00657888; | GMPPA   | 18.4 | 2.35E-148 | 0.086 | 4  | 7.9  | Q2 |
| IPI00010080; | OXSRI   | 20.7 | 2.40E-189 | 0.086 | 4  | 9.0  | Q2 |
| IPI00289499; | ATIC    | 70.1 | <1.0E-304 | 0.086 | 20 | 4.4  | Q2 |
| IPI00305064; | CD44    | 11.7 | 1.37E-95  | 0.086 | 16 | 9.3  | Q2 |
| IPI00009943; | TPT1    | 76.6 | 1.99E-117 | 0.087 | 12 | 7.0  | Q2 |
| IPI00746351; | DIS3    | 9.6  | 2.17E-50  | 0.087 | 5  | 6.2  | Q2 |
| IPI00419273; | CUL4A   | 8.8  | 1.07E-69  | 0.087 | 2  | 2.4  | Q2 |
| IPI00783271; | LRPPRC  | 55.6 | <1.0E-304 | 0.087 | 62 | 11.7 | Q2 |
| IPI00796333; | ALDOA   | 71.3 | <1.0E-304 | 0.088 | 38 | 15.3 | Q2 |
| IPI00376317; | EDC4    | 8.3  | 1.26E-50  | 0.088 | 3  | 67.9 | Q2 |
| IPI00021417; | SART1   | 12.1 | 1.90E-96  | 0.088 | 2  | 9.8  | Q2 |
| IPI00375144; | SRRT    | 26   | 1.57E-64  | 0.088 | 18 | 16.6 | Q2 |
| IPI00154975; | DNAJC9  | 26.9 | 1.32E-11  | 0.089 | 4  | 15.5 | Q2 |
| IPI00107357; | CLPTM1  | 7.4  | 2.46E-29  | 0.089 | 5  | 42.4 | Q2 |
| IPI00010720; | CCT5    | 64.1 | <1.0E-304 | 0.089 | 22 | 7.8  | Q2 |
| IPI00218487; | GJA1    | 10.2 | 8.69E-14  | 0.089 | 2  | 4.5  | Q2 |
| IPI00003588; | EEF1E1  | 28.7 | 3.48E-32  | 0.089 | 3  | 9.5  | Q2 |
| IPI00642904; | PABPC4  | 16.1 | <1.0E-304 | 0.089 | 5  | 4.2  | Q2 |
| IPI00785113; | LRRFIP1 | 10.3 | 1.43E-68  | 0.089 | 6  | 13.3 | Q2 |
| IPI00479786; | KHSRP   | 40.8 | 5.71E-206 | 0.089 | 26 | 15.4 | Q2 |
| IPI00872664; | USP14   | 26.5 | 4.82E-150 | 0.089 | 6  | 3.9  | Q2 |
| IPI00923582; | SCRN1   | 24.9 | 4.05E-120 | 0.089 | 5  | 3.3  | Q2 |
| IPI00004669; | GALNT2  | 22.8 | 2.24E-136 | 0.089 | 5  | 9.7  | Q2 |
| IPI00607554; | USP47   | 6.1  | 1.00E-27  | 0.090 | 2  | 10.4 | Q2 |
| IPI00008418; | DIABLO  | 9.8  | 2.09E-15  | 0.090 | 3  | 14.6 | Q2 |
| IPI00006079; | BCLAF1  | 11.4 | 7.21E-21  | 0.090 | 10 | 8.9  | Q2 |
| IPI00000051  | PFDN1   | 23   | 2.80E-14  | 0.091 | 4  | 6.3  | Q2 |
| IPI00299573; | RPL7A   | 47.4 | 1.46E-169 | 0.091 | 22 | 7.1  | Q2 |
| IPI00890837; | SMCHD1  | 4.6  | 1.21E-24  | 0.091 | 2  | 4.1  | Q2 |
| IPI00000816; | YWHAE   | 75.7 | <1.0E-304 | 0.091 | 38 | 12.2 | Q2 |

|              |           |      |           |       |    |      |    |
|--------------|-----------|------|-----------|-------|----|------|----|
| IPI00028004; | PSMB3     | 36.6 | 3.26E-153 | 0.091 | 8  | 6.4  | Q2 |
| IPI00414554  | ARPC5L    | 28.8 | 4.68E-52  | 0.091 | 2  | 4.7  | Q2 |
| IPI00295487; | KIF13A    | 2    | 4.33E-05  | 0.091 | 2  | 5.5  | Q2 |
| IPI00909064; | COASY     | 10.8 | 4.91E-26  | 0.092 | 2  | 13.1 | Q2 |
| IPI00218465; | PLAA      | 20.1 | 2.15E-152 | 0.092 | 4  | 5.5  | Q2 |
| IPI00218493; | HPRT1     | 57.8 | 1.31E-170 | 0.092 | 8  | 6.8  | Q2 |
| IPI00008575; | KHDRBS1   | 18.5 | 5.43E-54  | 0.092 | 8  | 20.8 | Q2 |
| IPI00409635; | FAM62B    | 16.3 | 3.42E-174 | 0.092 | 6  | 4.0  | Q2 |
| IPI00013877; | HNRNPH3   | 19.7 | 5.24E-129 | 0.092 | 7  | 8.3  | Q2 |
| IPI00604590; | NME1-NME2 | 70.9 | 3.41E-205 | 0.092 | 28 | 17.6 | Q2 |
| IPI00306290; | XPOT      | 24.3 | 2.73E-251 | 0.092 | 5  | 6.9  | Q2 |
| IPI00398708; | KLC1      | 35.4 | 2.25E-113 | 0.092 | 11 | 7.4  | Q2 |
| IPI00927531; | AP1S1     | 22.5 | 1.35E-36  | 0.092 | 3  | 4.3  | Q2 |
| IPI00007797; | FABP5     | 33.3 | 2.34E-10  | 0.093 | 2  | 2.2  | Q2 |
| IPI00017704  | COTL1     | 59.9 | 1.51E-75  | 0.093 | 10 | 9.8  | Q2 |
| IPI00171611; | HIST2H3A  | 57.4 | 9.32E-171 | 0.093 | 11 | 40.1 | Q2 |
| IPI00847342; | KRT7      | 52.7 | 2.03E-236 | 0.093 | 24 | 11.5 | Q2 |
| IPI00014151; | PSMD6     | 43.2 | 8.64E-86  | 0.093 | 14 | 17.2 | Q2 |
| IPI00027415; | DHX36     | 5.4  | 5.11E-57  | 0.094 | 2  | 17.4 | Q2 |
| IPI00031768  | HOOK3     | 14.6 | 2.18E-166 | 0.094 | 4  | 22.6 | Q2 |
| IPI00793443  | IPO5      | 41.7 | <1.0E-304 | 0.094 | 56 | 8.5  | Q2 |
| IPI00414320; | ANXA11    | 27.4 | 1.52E-201 | 0.094 | 17 | 19.6 | Q2 |
| IPI00872292; | RABL4     | 12.9 | 3.84E-18  | 0.094 | 2  | 6.6  | Q2 |
| IPI00396387; | GNL1      | 15.5 | 3.36E-96  | 0.094 | 2  | 8.8  | Q2 |
| IPI00871827; | RPL7      | 52.2 | 4.20E-175 | 0.095 | 27 | 4.8  | Q2 |
| IPI00220834; | XRCC5     | 58.7 | <1.0E-304 | 0.095 | 37 | 18.0 | Q2 |
| IPI00019169; | SH3GL1    | 31   | 3.27E-172 | 0.095 | 6  | 12.4 | Q2 |
| IPI00914529; | RPL28     | 28.4 | 2.56E-20  | 0.095 | 6  | 5.5  | Q2 |
| IPI00871890; | PICALM    | 33.9 | <1.0E-304 | 0.095 | 7  | 9.6  | Q2 |
| IPI00418313; | ILF3      | 36.2 | <1.0E-304 | 0.096 | 37 | 14.0 | Q2 |
| IPI00013068; | EIF3E     | 47.2 | 2.47E-284 | 0.096 | 7  | 10.3 | Q2 |
| IPI00017567; | ENG       | 14.4 | 1.25E-82  | 0.096 | 12 | 19.7 | Q2 |
| IPI00003965; | USP7      | 8.6  | 4.18E-20  | 0.096 | 5  | 5.0  | Q2 |

|              |         |      |           |       |    |      |    |
|--------------|---------|------|-----------|-------|----|------|----|
| IPI00008524; | PABPC1  | 37.9 | <1.0E-304 | 0.096 | 20 | 5.5  | Q2 |
| IPI00217030; | RPS4X   | 68.4 | 6.66E-219 | 0.096 | 25 | 8.8  | Q2 |
| IPI00719752; | EIF3B   | 39.2 | 3.59E-299 | 0.096 | 25 | 6.6  | Q2 |
| IPI00872754; | STK24   | 21.7 | 7.11E-123 | 0.096 | 2  | 0.0  | Q2 |
| IPI00003949; | UBE2N   | 52.6 | 6.92E-116 | 0.096 | 15 | 13.0 | Q2 |
| IPI00017367; | RDX     | 29.3 | 1.59E-292 | 0.096 | 9  | 15.8 | Q2 |
| IPI00006725; | DDX23   | 15   | 7.55E-39  | 0.097 | 3  | 29.3 | Q2 |
| IPI00911039  | HSPA1A  | 1.5  | <1.0E-304 | 0.097 | 3  | 12.2 | Q2 |
| IPI00216219; | TJP1    | 13.6 | 9.79E-84  | 0.097 | 14 | 11.1 | Q2 |
| IPI00220014; | IDI1    | 13.7 | 3.48E-33  | 0.098 | 2  | 9.0  | Q2 |
| IPI00301419; | COPS7A  | 25.1 | 5.20E-65  | 0.098 | 4  | 7.5  | Q2 |
| IPI00029557; | GRPEL1  | 14.3 | 2.21E-25  | 0.099 | 3  | 4.0  | Q2 |
| IPI00172591  | MRPL17  | 9.1  | 8.85E-03  | 0.099 | 2  | 1.5  | Q2 |
| IPI00299000; | PA2G4   | 34   | 1.17E-98  | 0.099 | 8  | 22.3 | Q2 |
| IPI00103525; | PSPC1   | 17.8 | 2.43E-52  | 0.099 | 5  | 7.9  | Q2 |
| IPI00465308; | PIGS    | 10.6 | 3.39E-183 | 0.099 | 2  | 9.8  | Q2 |
| IPI00014938; | SARNP   | 32.4 | 5.29E-89  | 0.099 | 3  | 2.6  | Q2 |
| IPI00646689; | TXNDC17 | 15.4 | 2.01E-03  | 0.099 | 2  | 2.2  | Q2 |
| IPI00827535; | PTMA    | 35.1 | 7.25E-158 | 0.099 | 3  | 5.4  | Q2 |
| IPI00307155; | ROCK2   | 19.4 | 1.87E-198 | 0.099 | 15 | 9.0  | Q2 |
| IPI00171844  | COPS4   | 27.3 | 4.54E-125 | 0.100 | 4  | 10.9 | Q2 |
| IPI00221089  | RPS13   | 44.4 | 2.85E-113 | 0.100 | 8  | 6.1  | Q2 |
| IPI00020042; | PSMC4   | 52.4 | 1.10E-277 | 0.100 | 10 | 7.3  | Q2 |
| IPI00465233; | EIF3EIP | 41.8 | <1.0E-304 | 0.100 | 15 | 8.5  | Q2 |
| IPI00218343; | TUBA1C  | 12.2 | <1.0E-304 | 0.100 | 10 | 6.0  | Q2 |
| IPI00005578  | EHD4    | 23.3 | 2.74E-187 | 0.101 | 6  | 8.5  | Q2 |
| IPI00301618; | SDCCAG1 | 8.5  | 4.31E-19  | 0.101 | 5  | 12.4 | Q2 |
| IPI00059279; | EXOC4   | 15.8 | 2.74E-83  | 0.102 | 3  | 9.3  | Q2 |
| IPI00550746; | NUDC    | 31.1 | 3.45E-65  | 0.102 | 3  | 12.0 | Q2 |
| IPI00218475; | IFI35   | 19.1 | 4.37E-17  | 0.102 | 2  | 9.6  | Q2 |
| IPI00017596; | MAPRE1  | 44.4 | 1.29E-210 | 0.103 | 11 | 14.0 | Q2 |
| IPI00300562  | RAB3B   | 38.4 | 1.90E-120 | 0.103 | 9  | 14.8 | Q2 |
| IPI00550021; | RPL3    | 39.7 | 5.60E-144 | 0.103 | 29 | 29.4 | Q2 |

|              |         |      |           |       |     |      |    |
|--------------|---------|------|-----------|-------|-----|------|----|
| IPI00472160; | ARHGEF2 | 16.9 | 1.52E-87  | 0.103 | 10  | 16.3 | Q2 |
| IPI00012578  | KPNA4   | 15.4 | 4.87E-148 | 0.103 | 4   | 16.9 | Q2 |
| IPI00184363; | GLTP    | 17.7 | 1.49E-60  | 0.103 | 3   | 6.3  | Q2 |
| IPI00291419  | ACAT2   | 38   | 6.30E-189 | 0.103 | 8   | 5.4  | Q2 |
| IPI00027808; | POLR2B  | 10.5 | 1.50E-24  | 0.104 | 7   | 6.2  | Q2 |
| IPI00221035; | BTF3    | 59.2 | 3.70E-114 | 0.104 | 9   | 6.8  | Q2 |
| IPI00021290; | ACLY    | 53.6 | <1.0E-304 | 0.104 | 88  | 12.0 | Q2 |
| IPI00011619  | PAPSS1  | 8.7  | 2.19E-74  | 0.104 | 4   | 9.4  | Q2 |
| IPI00843975; | EZR     | 43.2 | <1.0E-304 | 0.104 | 21  | 8.8  | Q2 |
| IPI00003870  | CLPP    | 15.2 | 1.12E-17  | 0.105 | 2   | 2.7  | Q2 |
| IPI00019642; | CLIP2   | 6    | 2.24E-44  | 0.105 | 3   | 7.3  | Q2 |
| IPI00004968  | PRPF19  | 24.4 | 5.10E-70  | 0.105 | 3   | 0.3  | Q2 |
| IPI00792422; | FAM21A  | 18.5 | <1.0E-304 | 0.105 | 9   | 7.1  | Q2 |
| IPI00921422; | CKAP5   | 19.4 | 1.60E-233 | 0.105 | 24  | 19.7 | Q2 |
| IPI00217952; | GFPT1   | 51.4 | <1.0E-304 | 0.105 | 17  | 6.3  | Q2 |
| IPI00029012  | EIF3A   | 49.6 | <1.0E-304 | 0.105 | 74  | 10.7 | Q2 |
| IPI00396485; | EEF1A1  | 61.5 | <1.0E-304 | 0.105 | 108 | 26.8 | Q2 |
| IPI00299608; | PSMD1   | 32.2 | 3.94E-298 | 0.106 | 30  | 15.2 | Q2 |
| IPI00009322; | NEDD4   | 7.6  | 3.01E-18  | 0.106 | 3   | 16.5 | Q2 |
| IPI00294879; | RANGAP1 | 41.1 | 6.46E-243 | 0.106 | 14  | 10.4 | Q2 |
| IPI00910962; | ELOVL5  | 4    | 4.13E-37  | 0.107 | 2   | 5.2  | Q2 |
| IPI00024971; | OSBP    | 17.6 | 5.32E-80  | 0.107 | 2   | 7.2  | Q2 |
| IPI00157757; | MICAL1  | 18.5 | 1.51E-126 | 0.108 | 11  | 12.4 | Q2 |
| IPI00220644; | PKM2    | 5.8  | <1.0E-304 | 0.108 | 3   | 4.3  | Q2 |
| IPI00419249; | PSMA3   | 47.5 | 3.25E-103 | 0.108 | 13  | 8.0  | Q2 |
| IPI00856049  | RPL22L1 | 39.3 | 2.50E-28  | 0.108 | 3   | 5.7  | Q2 |
| IPI00291930; | CLINT1  | 9.3  | 4.39E-17  | 0.109 | 2   | 6.5  | Q2 |
| IPI00017451; | SF3A1   | 29.9 | 2.09E-173 | 0.109 | 12  | 14.8 | Q2 |
| IPI00479262; | EIF4G1  | 27.5 | <1.0E-304 | 0.109 | 51  | 11.3 | Q2 |
| IPI00384265; | FAM120A | 27   | 2.92E-192 | 0.110 | 11  | 14.0 | Q2 |
| IPI00855940; | XPO7    | 14.1 | 9.78E-140 | 0.110 | 5   | 7.1  | Q2 |
| IPI00658097; | HMGN1   | 25   | 2.18E-57  | 0.110 | 2   | 4.1  | Q2 |
| IPI00784090; | CCT8    | 54.9 | <1.0E-304 | 0.110 | 33  | 31.8 | Q2 |

|              |          |      |           |       |     |      |    |
|--------------|----------|------|-----------|-------|-----|------|----|
| IPI00008485; | ACO1     | 45.1 | <1.0E-304 | 0.110 | 32  | 8.0  | Q2 |
| IPI00219029; | GOT1     | 41.9 | 5.52E-241 | 0.110 | 12  | 9.0  | Q2 |
| IPI00030654; | CPSF6    | 14.3 | 4.36E-134 | 0.111 | 3   | 11.8 | Q2 |
| IPI00438286; | ERBB2IP  | 8    | 6.70E-45  | 0.111 | 2   | 14.7 | Q2 |
| IPI00872194; | COLEC12  | 10.2 | 8.64E-24  | 0.111 | 7   | 12.9 | Q2 |
| IPI00641788; | SNRPC    | 11.7 | 4.62E-28  | 0.111 | 2   | 5.1  | Q2 |
| IPI00644297; | SKI2W    | 15.4 | 1.34E-78  | 0.112 | 6   | 8.1  | Q2 |
| IPI00219604; | MAP2K1   | 6.6  | 5.56E-28  | 0.112 | 2   | 17.4 | Q2 |
| IPI00020719  | MAVS     | 6.9  | 1.21E-19  | 0.113 | 3   | 7.3  | Q2 |
| IPI00022744; | CSE1L    | 45.6 | <1.0E-304 | 0.113 | 30  | 15.0 | Q2 |
| IPI00329573; | COL12A1  | 34.7 | <1.0E-304 | 0.113 | 90  | 16.6 | Q2 |
| IPI00872773; | ERO1L    | 23.3 | 1.49E-91  | 0.113 | 4   | 3.5  | Q2 |
| IPI00014232; | ARL6IP1  | 6.9  | 4.10E-02  | 0.114 | 2   | 6.1  | Q2 |
| IPI00328905  | IQGAP3   | 3.2  | 3.35E-85  | 0.114 | 2   | 11.3 | Q2 |
| IPI00305267; | GOLGA3   | 27.4 | <1.0E-304 | 0.114 | 15  | 10.1 | Q2 |
| IPI00329512; | SNRPB    | 20.8 | 3.14E-62  | 0.114 | 7   | 11.2 | Q2 |
| IPI00549664; | TEX10    | 10.7 | 4.48E-97  | 0.114 | 3   | 13.7 | Q2 |
| IPI00296099; | THBS1    | 40.8 | <1.0E-304 | 0.115 | 157 | 16.1 | Q2 |
| IPI00031820; | FARSA    | 22.6 | 1.86E-104 | 0.115 | 4   | 6.0  | Q2 |
| IPI00719725; | SAPS3    | 3.8  | 6.29E-04  | 0.116 | 2   | 8.2  | Q2 |
| IPI00395939; | PITPNB   | 37.4 | 8.61E-77  | 0.117 | 2   | 11.7 | Q2 |
| IPI00008552  | GLRX3    | 40.6 | 1.12E-116 | 0.117 | 7   | 10.0 | Q2 |
| IPI00410287; | PRKAA1   | 10.8 | 1.88E-73  | 0.117 | 2   | 16.2 | Q2 |
| IPI00738765; | KIAA1949 | 23.8 | 6.87E-33  | 0.118 | 10  | 9.1  | Q2 |
| IPI00001676; | NPLOC4   | 22.9 | 2.86E-229 | 0.118 | 6   | 11.5 | Q2 |
| IPI00299254  | EIF5B    | 19.6 | 2.11E-226 | 0.118 | 14  | 11.2 | Q2 |
| IPI00604464; | UBE3C    | 6.6  | 1.02E-21  | 0.118 | 2   | 6.6  | Q2 |
| IPI00218606; | RPS23    | 29.4 | 4.28E-22  | 0.119 | 4   | 18.7 | Q2 |
| IPI00783902; | HEATR5A  | 2.2  | 1.52E-38  | 0.119 | 3   | 4.7  | Q2 |
| IPI00644708; | TIAL1    | 17.1 | 6.63E-52  | 0.119 | 3   | 0.9  | Q2 |
| IPI00001757; | RBM8A    | 26.4 | 6.45E-134 | 0.120 | 2   | 5.0  | Q2 |
| IPI00289082; | PTPN12   | 8.3  | 1.76E-61  | 0.121 | 3   | 36.8 | Q2 |
| IPI00915363; | RPS24    | 16.3 | 3.78E-76  | 0.121 | 8   | 5.5  | Q2 |

|              |          |      |           |       |    |      |    |
|--------------|----------|------|-----------|-------|----|------|----|
| IPI00411730; | PPP4R1   | 6.3  | 6.49E-32  | 0.121 | 4  | 9.8  | Q2 |
| IPI00921428; | IMPA1    | 16.7 | 8.47E-38  | 0.121 | 4  | 11.1 | Q2 |
| IPI00884896; | TXNRD1   | 49.3 | <1.0E-304 | 0.122 | 11 | 7.7  | Q2 |
| IPI00329685; | ARSA     | 12   | 2.11E-97  | 0.122 | 2  | 49.5 | Q2 |
| IPI00026625; | NUP155   | 9.5  | 5.81E-38  | 0.122 | 4  | 16.4 | Q2 |
| IPI00033600; | PPP1R7   | 35.6 | 1.02E-161 | 0.123 | 7  | 21.4 | Q2 |
| IPI00914871; | SERPINE2 | 16.1 | 1.92E-98  | 0.123 | 9  | 4.8  | Q2 |
| IPI00015973; | EPB41L2  | 20.2 | 4.33E-153 | 0.124 | 4  | 7.6  | Q2 |
| IPI00646779  | TUBB6    | 24.6 | <1.0E-304 | 0.124 | 11 | 2.2  | Q2 |
| IPI00019918; | DDX19A   | 19.7 | 3.66E-37  | 0.124 | 3  | 11.3 | Q2 |
| IPI00477040; | NUP188   | 5.5  | 2.16E-17  | 0.124 | 2  | 0.3  | Q2 |
| IPI00012795; | EIF3I    | 27.4 | 6.18E-42  | 0.125 | 5  | 7.8  | Q2 |
| IPI00334587; | HNRNPAB  | 25   | 1.74E-146 | 0.125 | 6  | 8.8  | Q2 |
| IPI00002857; | MAPK14   | 16.4 | 1.57E-25  | 0.125 | 2  | 3.9  | Q2 |
| IPI00413100; | PHLDB1   | 6    | 1.90E-51  | 0.126 | 2  | 12.1 | Q2 |
| IPI00412243  | KIAA1609 | 18.4 | 1.24E-44  | 0.127 | 2  | 3.3  | Q2 |
| IPI00012079; | EIF4B    | 27.4 | 1.47E-129 | 0.127 | 9  | 9.2  | Q2 |
| IPI00032038; | CPT1A    | 21.9 | 2.64E-119 | 0.128 | 2  | 5.6  | Q2 |
| IPI00744319; | PRRC1    | 6.7  | 5.11E-35  | 0.128 | 2  | 5.2  | Q2 |
| IPI00442073; | CSRP1    | 46.6 | 2.38E-127 | 0.128 | 11 | 7.2  | Q2 |
| IPI00853369; | PLXNB2   | 7.1  | 2.38E-84  | 0.128 | 3  | 3.2  | Q2 |
| IPI00007722; | AMPD2    | 13   | 1.94E-23  | 0.129 | 4  | 10.7 | Q2 |
| IPI00009111  | TPBG     | 18.6 | 7.75E-105 | 0.129 | 6  | 9.5  | Q2 |
| IPI00002478; | ECE1     | 20.3 | 1.06E-110 | 0.130 | 10 | 4.4  | Q2 |
| IPI00411937; | NOP56    | 27.1 | 4.44E-226 | 0.131 | 10 | 7.3  | Q2 |
| IPI00024661; | SEC24C   | 19.3 | 3.26E-100 | 0.132 | 16 | 14.2 | Q2 |
| IPI00003783; | MAP2K2   | 17.5 | 3.54E-19  | 0.132 | 2  | 2.0  | Q2 |
| IPI00328257; | AP1B1    | 25.5 | <1.0E-304 | 0.132 | 7  | 6.5  | Q2 |
| IPI00395748; | ACOT7    | 22.7 | 3.40E-115 | 0.132 | 6  | 5.1  | Q2 |
| IPI00924788; | AADA1    | 17.4 | 1.78E-57  | 0.133 | 2  | 6.1  | Q2 |
| IPI00030371; | TRIM4    | 2.2  | 2.43E-01  | 0.133 | 9  | 9.4  | Q2 |
| IPI00029267; | SNRPB2   | 20.4 | 1.69E-14  | 0.134 | 5  | 19.2 | Q2 |
| IPI00306369  | NSUN2    | 13.7 | 3.34E-130 | 0.134 | 3  | 14.4 | Q2 |

|              |          |      |           |       |     |       |    |
|--------------|----------|------|-----------|-------|-----|-------|----|
| IPI00220152; | BCCIP    | 14.6 | 2.42E-22  | 0.134 | 2   | 10.5  | Q2 |
| IPI00783872; | CAPRIN1  | 17.8 | 2.01E-150 | 0.135 | 10  | 10.3  | Q2 |
| IPI00647635; | GIGYF2   | 9.8  | 6.63E-56  | 0.135 | 6   | 1.4   | Q2 |
| IPI00220194; | SLC2A1   | 4.9  | 4.61E-18  | 0.136 | 8   | 51.8  | Q2 |
| IPI00395627; | CACYBP   | 57   | 3.59E-56  | 0.136 | 9   | 5.8   | Q2 |
| IPI00027180  | ZMPSTE24 | 6.7  | 1.54E-68  | 0.137 | 3   | 107.5 | Q2 |
| IPI00300074; | FARSB    | 31.7 | 8.91E-111 | 0.137 | 9   | 18.4  | Q2 |
| IPI00009456; | NT5E     | 47.7 | <1.0E-304 | 0.137 | 14  | 40.9  | Q2 |
| IPI00013174; | RBM14    | 13.6 | 1.76E-38  | 0.138 | 4   | 13.7  | Q2 |
| IPI00221088; | RPS9     | 66   | 3.65E-38  | 0.138 | 24  | 42.5  | Q2 |
| IPI00024821; | PSMD14   | 44.8 | 1.60E-71  | 0.138 | 4   | 4.9   | Q2 |
| IPI00033130; | SAE1     | 29.8 | 4.42E-104 | 0.138 | 3   | 5.8   | Q2 |
| IPI00021985; | TM9SF4   | 10   | 5.74E-21  | 0.139 | 6   | 83.0  | Q2 |
| IPI00001466; | EML4     | 12.7 | 2.49E-56  | 0.140 | 8   | 6.8   | Q2 |
| IPI00009505; | SNTB2    | 10.6 | 4.88E-28  | 0.140 | 3   | 15.4  | Q2 |
| IPI00014219; | SNX17    | 11.7 | 1.05E-31  | 0.140 | 2   | 2.9   | Q2 |
| IPI00295772; | CYP51A1  | 23.4 | 1.19E-133 | 0.140 | 4   | 5.1   | Q2 |
| IPI00002149; | SAR1B    | 11.6 | 7.49E-26  | 0.141 | 2   | 13.9  | Q2 |
| IPI00219160; | RPL34    | 36.8 | 9.14E-10  | 0.141 | 7   | 3.9   | Q2 |
| IPI00554541; | ILVBL    | 18.4 | 4.19E-154 | 0.141 | 5   | 11.3  | Q2 |
| IPI00030774; | TBCD     | 18.8 | 1.18E-63  | 0.143 | 9   | 11.6  | Q2 |
| IPI00022697; | DRG2     | 15.1 | 3.15E-91  | 0.144 | 3   | 4.0   | Q2 |
| IPI00026969; | SEC23IP  | 9.7  | 3.99E-67  | 0.144 | 4   | 3.2   | Q2 |
| IPI00642798  | SC65     | 15.7 | 2.37E-74  | 0.144 | 3   | 22.1  | Q2 |
| IPI00017895; | GPD2     | 26.4 | 3.02E-157 | 0.145 | 8   | 3.7   | Q2 |
| IPI00289334; | FLNB     | 53.3 | <1.0E-304 | 0.145 | 111 | 24.6  | Q2 |
| IPI00929344; | PFAS     | 14.3 | 9.78E-230 | 0.145 | 9   | 90.6  | Q2 |
| IPI00472164; | WASF2    | 6.8  | 2.63E-47  | 0.145 | 3   | 4.9   | Q2 |
| IPI00744211; | EIF4E2   | 13.9 | 1.42E-17  | 0.145 | 2   | 1.2   | Q2 |
| IPI00220465; | LIMA1    | 3.8  | <1.0E-304 | 0.146 | 3   | 1.5   | Q2 |
| IPI00386258; | MTCH1    | 8    | 3.30E-12  | 0.146 | 2   | 7.7   | Q2 |
| IPI00016669  | RHEB     | 32.1 | 8.68E-73  | 0.147 | 4   | 3.8   | Q2 |
| IPI00152658; | NEK7     | 29.5 | 5.52E-32  | 0.147 | 4   | 12.5  | Q2 |

|              |           |      |           |       |    |      |    |
|--------------|-----------|------|-----------|-------|----|------|----|
| IPI00386189; | NARG1     | 22.3 | 1.71E-91  | 0.148 | 13 | 14.1 | Q2 |
| IPI00102864; | HK2       | 8    | 4.45E-85  | 0.148 | 2  | 6.5  | Q2 |
| IPI00152692  | DTD1      | 20.1 | 3.62E-36  | 0.148 | 2  | 17.0 | Q2 |
| IPI00441473; | PRMT5     | 14.6 | 5.32E-64  | 0.148 | 5  | 8.2  | Q2 |
| IPI00007117; | SERPINB2  | 27.7 | 1.26E-233 | 0.149 | 9  | 10.3 | Q2 |
| IPI00217413  | DHX29     | 5.3  | 1.01E-14  | 0.149 | 2  | 17.1 | Q2 |
| IPI00003935; | HIST2H2BE | 13.5 | 1.22E-71  | 0.149 | 4  | 7.5  | Q2 |
| IPI00030782; | STAT6     | 18.5 | 1.07E-62  | 0.149 | 5  | 12.3 | Q2 |
| IPI00013871  | RRM1      | 9.1  | 6.00E-24  | 0.149 | 4  | 5.4  | Q2 |
| IPI00016915  | IGFBP7    | 16.3 | 2.15E-80  | 0.150 | 2  | 2.5  | Q2 |
| IPI00220901; | TBC1D4    | 2.2  | 1.06E-19  | 0.151 | 2  | 20.4 | Q2 |
| IPI00030320  | DDX6      | 13.5 | 9.35E-67  | 0.152 | 5  | 3.0  | Q2 |
| IPI00008164  | PREP      | 26.3 | 2.51E-287 | 0.152 | 2  | 8.8  | Q2 |
| IPI00017376; | SEC23B    | 3.4  | 4.57E-74  | 0.152 | 2  | 9.5  | Q2 |
| IPI00005634  | TTC37     | 12.7 | 2.51E-177 | 0.153 | 5  | 17.6 | Q2 |
| IPI00165393; | ANP32E    | 14.6 | 1.20E-53  | 0.153 | 2  | 7.9  | Q2 |
| IPI00479058; | RPS15     | 64.8 | 8.57E-111 | 0.153 | 8  | 11.3 | Q2 |
| IPI00017672; | NP        | 36.2 | 2.64E-78  | 0.154 | 7  | 8.5  | Q2 |
| IPI00328350; | FAM129A   | 18   | 2.53E-123 | 0.154 | 5  | 13.7 | Q2 |
| IPI00927682; | RAB3GAP1  | 17.2 | 1.14E-57  | 0.154 | 8  | 21.0 | Q2 |
| IPI00016605; | C1orf123  | 10   | 7.43E-03  | 0.154 | 2  | 11.7 | Q2 |
| IPI00030851; | SEC24B    | 6.8  | 2.54E-89  | 0.154 | 4  | 5.7  | Q2 |
| IPI00376229; | PACS1     | 10.7 | 4.35E-36  | 0.155 | 3  | 5.6  | Q2 |
| IPI00303954; | CYB5B     | 12   | 1.15E-19  | 0.155 | 2  | 10.1 | Q2 |
| IPI00021831; | PRKAR1A   | 31.8 | 9.55E-146 | 0.155 | 6  | 18.7 | Q2 |
| IPI00007188; | SLC25A5   | 19.5 | 4.73E-161 | 0.155 | 12 | 67.3 | Q2 |
| IPI00179473; | SQSTM1    | 26.6 | 5.98E-227 | 0.156 | 10 | 15.1 | Q2 |
| IPI00215780; | RPS19     | 64.8 | 6.89E-74  | 0.156 | 15 | 6.9  | Q2 |
| IPI00216171; | ENO2      | 23.3 | <1.0E-304 | 0.156 | 2  | 11.5 | Q2 |
| IPI00299904; | MCM7      | 24.8 | 2.62E-148 | 0.157 | 6  | 2.2  | Q2 |
| IPI00871854; | SAMM50    | 15.6 | 4.25E-17  | 0.158 | 3  | 6.7  | Q2 |
| IPI00018235  | PEF1      | 20.8 | 2.82E-27  | 0.159 | 5  | 7.4  | Q2 |
| IPI00654605; | MAP7D1    | 7.6  | 7.01E-71  | 0.160 | 6  | 19.4 | Q2 |



|              |          |      |           |       |    |      |    |
|--------------|----------|------|-----------|-------|----|------|----|
| IPI00735181; | UNC45A   | 26.5 | 7.14E-257 | 0.160 | 9  | 5.2  | Q2 |
| IPI00003217; | PSMB7    | 26   | 5.81E-23  | 0.162 | 4  | 8.4  | Q2 |
| IPI00025329; | RPL19    | 27   | 1.15E-132 | 0.162 | 7  | 39.1 | Q2 |
| IPI00034006; | PTPN23   | 11.3 | 1.23E-126 | 0.163 | 8  | 8.6  | Q2 |
| IPI00290142; | CTPS     | 33.8 | <1.0E-304 | 0.164 | 11 | 7.4  | Q2 |
| IPI00220059; | NDUFB4   | 26.4 | 4.04E-86  | 0.165 | 2  | 55.5 | Q2 |
| IPI00783781; | NUP205   | 7    | 2.08E-44  | 0.167 | 4  | 10.5 | Q2 |
| IPI00480028; | ABI1     | 10.6 | 1.49E-26  | 0.167 | 4  | 38.3 | Q2 |
| IPI00412672; | PKN1     | 5.8  | 5.80E-25  | 0.169 | 4  | 4.6  | Q2 |
| IPI00032881  | MRPS23   | 15.8 | 2.86E-17  | 0.170 | 2  | 5.9  | Q2 |
| IPI00018350; | MCM5     | 18.9 | 1.08E-88  | 0.171 | 6  | 9.8  | Q2 |
| IPI00184330; | MCM2     | 20.8 | 3.62E-169 | 0.171 | 13 | 8.7  | Q2 |
| IPI00332499; | NASP     | 5.9  | 2.03E-14  | 0.172 | 3  | 11.7 | Q2 |
| IPI00397571; | NSFL1C   | 24.7 | 2.93E-54  | 0.172 | 2  | 0.4  | Q2 |
| IPI00398009; | IPO4     | 16.3 | 8.14E-118 | 0.174 | 8  | 10.9 | Q2 |
| IPI00657953; | TRIO     | 4.5  | 1.13E-42  | 0.176 | 2  | 13.4 | Q2 |
| IPI00782985  | EIF4G2   | 29.7 | 4.97E-117 | 0.176 | 14 | 47.2 | Q2 |
| IPI00013679; | DUT      | 25.8 | 3.98E-136 | 0.177 | 3  | 7.3  | Q2 |
| IPI00290542; | STAM2    | 7    | 9.43E-55  | 0.177 | 2  | 6.9  | Q2 |
| IPI00414289; | GPS1     | 15.6 | 1.95E-18  | 0.177 | 2  | 9.9  | Q2 |
| IPI00554777; | ASNS     | 20.9 | 3.90E-161 | 0.178 | 3  | 4.0  | Q2 |
| IPI00744637; | RUFY1    | 19.9 | 6.87E-98  | 0.178 | 2  | 22.1 | Q2 |
| IPI00073179; | VPS33A   | 7.9  | 3.23E-09  | 0.180 | 2  | 15.3 | Q2 |
| IPI00031023; | FLII     | 22.5 | 2.99E-229 | 0.181 | 21 | 11.4 | Q2 |
| IPI00298476; | GREM1    | 31   | 6.67E-47  | 0.181 | 5  | 18.6 | Q2 |
| IPI00376976; | ASAP1    | 6.4  | 4.75E-29  | 0.182 | 3  | 19.8 | Q2 |
| IPI00855820; | MON2     | 4.9  | 2.82E-25  | 0.182 | 4  | 14.5 | Q2 |
| IPI00020178; | STAM     | 13.3 | 7.14E-123 | 0.183 | 4  | 9.6  | Q2 |
| IPI00465361; | RPL13    | 52.6 | 2.28E-42  | 0.183 | 19 | 30.8 | Q2 |
| IPI00031812; | YBX1     | 40.4 | <1.0E-304 | 0.183 | 3  | 16.8 | Q2 |
| IPI00873472; | SEC24A   | 10   | 1.91E-111 | 0.183 | 12 | 9.8  | Q2 |
| IPI00003627; | ACTL6A   | 6.5  | 3.26E-16  | 0.184 | 2  | 15.7 | Q2 |
| IPI00024425; | KIAA0664 | 5.1  | 2.33E-27  | 0.184 | 4  | 7.7  | Q2 |

|              |               |      |           |       |    |      |    |
|--------------|---------------|------|-----------|-------|----|------|----|
| IPI00453473  | HIST1H4A      | 53.4 | 1.29E-131 | 0.185 | 29 | 28.3 | Q2 |
| IPI00464952; | SFRS11        | 5.2  | 1.54E-16  | 0.185 | 2  | 0.1  | Q2 |
| IPI00220873; | PAPSS2        | 36.5 | 8.74E-298 | 0.186 | 19 | 6.4  | Q2 |
| IPI00334715; | GRLF1         | 5.4  | 2.28E-12  | 0.186 | 4  | 95.1 | Q2 |
| IPI00013455; | CLIP1         | 10.7 | 1.32E-64  | 0.188 | 6  | 18.9 | Q2 |
| IPI00376689; | KIAA1199      | 28.3 | 1.06E-135 | 0.190 | 33 | 12.3 | Q2 |
| IPI00010400; | PLCB3         | 10.2 | 6.75E-128 | 0.191 | 4  | 8.9  | Q2 |
| IPI00296635; | GBE1          | 43.6 | 5.90E-229 | 0.191 | 16 | 24.3 | Q2 |
| IPI00002335  | HTT           | 2.8  | 4.22E-10  | 0.193 | 2  | 12.2 | Q2 |
| IPI00302740; | RPS4Y1        | 22.8 | 2.42E-97  | 0.193 | 4  | 16.6 | Q2 |
| IPI00027009; | PACSN2        | 14.4 | 6.62E-30  | 0.195 | 2  | 3.7  | Q2 |
| IPI00872209; | PPP3CA        | 19.3 | 3.00E-62  | 0.195 | 5  | 4.9  | Q2 |
| IPI00815713; | TCOF1         | 3.1  | 3.24E-12  | 0.196 | 3  | 7.1  | Q2 |
| IPI00783378; | UBE2O         | 3.9  | 9.49E-14  | 0.197 | 3  | 4.8  | Q2 |
| IPI00816771; | WASH1         | 11.5 | 1.01E-35  | 0.199 | 2  | 10.7 | Q2 |
| IPI00333067; | HERC4         | 11.5 | 2.32E-26  | 0.199 | 7  | 5.3  | Q2 |
| IPI00376219; | APBB1IP       | 5.4  | 6.33E-07  | 0.200 | 2  | 3.1  | Q2 |
| IPI00006176; | HGS           | 14.9 | 3.54E-66  | 0.202 | 6  | 6.0  | Q2 |
| IPI00024320; | RBM3          | 45.9 | 1.73E-80  | 0.203 | 4  | 5.5  | Q2 |
| IPI00020454  | DCK           | 6.2  | 7.43E-03  | 0.203 | 3  | 1.5  | Q2 |
| IPI00299193  | SYNJ2BP       | 15.2 | 2.38E-05  | 0.204 | 2  | 10.8 | Q2 |
| IPI00815732  | DKFZp781N1372 | 33.3 | 5.96E-156 | 0.204 | 5  | 5.8  | Q2 |
| IPI00923606; | EPRS          | 44.3 | <1.0E-304 | 0.204 | 45 | 11.6 | Q2 |
| IPI00746455; | FARP1         | 15.9 | 9.85E-75  | 0.205 | 7  | 16.4 | Q2 |
| IPI00004409; | DDR2          | 8    | 2.24E-24  | 0.206 | 2  | 9.5  | Q2 |
| IPI00917683; | SUMO1         | 13   | 1.58E-06  | 0.207 | 3  | 20.3 | Q2 |
| IPI00032134; | SERPINB8      | 23.3 | 4.01E-83  | 0.207 | 2  | 1.9  | Q2 |
| IPI00216237  | RPL36         | 30.5 | 1.31E-10  | 0.207 | 6  | 40.2 | Q2 |
| IPI00019472; | SLC1A5        | 11.8 | 1.41E-78  | 0.209 | 10 | 96.5 | Q2 |
| IPI00790530; | NUP85         | 7    | 1.30E-50  | 0.210 | 2  | 5.3  | Q2 |
| IPI00016746; | CBFB          | 23.6 | 2.23E-46  | 0.212 | 2  | 16.5 | Q2 |
| IPI00291802; | LMO7          | 47.7 | <1.0E-304 | 0.213 | 70 | 19.3 | Q2 |
| IPI00745406; | SPAG9         | 19.7 | 2.30E-111 | 0.214 | 10 | 11.3 | Q2 |

|              |           |      |           |       |    |      |    |
|--------------|-----------|------|-----------|-------|----|------|----|
| IPI00438229; | TRIM28    | 28.5 | 1.59E-267 | 0.216 | 24 | 11.2 | Q2 |
| IPI00852685; | DIAPH1    | 13.9 | 3.01E-69  | 0.216 | 10 | 12.7 | Q2 |
| IPI00291946; | USP10     | 15.7 | 9.84E-79  | 0.216 | 4  | 24.6 | Q2 |
| IPI00157790; | ECM29     | 17.2 | 3.99E-221 | 0.217 | 21 | 14.1 | Q2 |
| IPI00021338; | DLAT      | 18.2 | 6.94E-74  | 0.220 | 5  | 9.4  | Q2 |
| IPI00328293; | SRRM1     | 9.5  | 2.05E-21  | 0.222 | 3  | 7.8  | Q2 |
| IPI00514856; | UBAP2L    | 18.4 | 2.15E-230 | 0.225 | 15 | 9.6  | Q2 |
| IPI00829657; | ARHGAP17  | 8.4  | 2.41E-84  | 0.226 | 4  | 4.7  | Q2 |
| IPI00000684; | UAP1      | 20.9 | 6.10E-82  | 0.227 | 11 | 12.2 | Q2 |
| IPI00152890; | NOL6      | 2.4  | 4.30E-02  | 0.227 | 2  | 10.5 | Q2 |
| IPI00385267  | SRPR      | 26.8 | 1.46E-73  | 0.229 | 9  | 16.7 | Q2 |
| IPI00013706; | MRPL20    | 20.1 | 8.94E-17  | 0.229 | 2  | 4.6  | Q2 |
| IPI00456363; | ATXN2L    | 8    | 1.93E-22  | 0.230 | 6  | 11.4 | Q2 |
| IPI00790342; | RPL6      | 49.1 | 1.89E-198 | 0.231 | 18 | 24.3 | Q2 |
| IPI00003269  | ACTBL2    | 4.8  | 4.52E-128 | 0.241 | 6  | 45.8 | Q2 |
| IPI00215719; | RPL18     | 45.7 | 8.07E-78  | 0.241 | 13 | 20.4 | Q2 |
| IPI00008475; | HMGCS1    | 12.9 | 1.24E-62  | 0.242 | 3  | 4.0  | Q2 |
| IPI00293203  | SULF1     | 4.7  | 4.03E-03  | 0.243 | 5  | 4.8  | Q2 |
| IPI00008708; | RSL1D1    | 13.5 | 1.27E-56  | 0.251 | 3  | 15.0 | Q2 |
| IPI00337648; | PTPN13    | 1.3  | 2.87E-06  | 0.253 | 2  | 0.4  | Q2 |
| IPI00444452; | MOV10     | 9.1  | 6.92E-32  | 0.258 | 5  | 10.3 | Q2 |
| IPI00012235; | NDFIP1    | 12.7 | 3.73E-44  | 0.261 | 2  | 7.7  | Q2 |
| IPI00005792; | PABPN1    | 12.1 | 5.48E-21  | 0.264 | 3  | 26.0 | Q2 |
| IPI00412607; | RPL35     | 26   | 2.42E-15  | 0.266 | 5  | 6.3  | Q2 |
| IPI00010717; | MVK       | 11.1 | 7.13E-23  | 0.267 | 2  | 2.2  | Q2 |
| IPI00759799; | HBEBP2BPA | 11.4 | 8.73E-19  | 0.268 | 3  | 79.1 | Q2 |
| IPI00550032; | RP11      | 39.7 | 3.66E-94  | 0.274 | 17 | 16.8 | Q2 |
| IPI00306933; | MYO9B     | 5    | 1.68E-30  | 0.275 | 2  | 3.5  | Q2 |
| IPI00017341  | SF3A2     | 8.1  | 5.16E-74  | 0.275 | 3  | 17.7 | Q2 |
| IPI00645431; | BAT3      | 6.9  | 7.48E-94  | 0.280 | 7  | 9.9  | Q2 |
| IPI00927658; | RPL32     | 39.2 | 1.93E-17  | 0.281 | 5  | 11.2 | Q2 |
| IPI00396279; | CLASP1    | 4.2  | 9.75E-15  | 0.283 | 3  | 10.3 | Q2 |
| IPI00290043; | ITGA3     | 5.6  | 1.07E-24  | 0.286 | 4  | 1.7  | Q2 |

|              |          |      |           |       |    |       |    |
|--------------|----------|------|-----------|-------|----|-------|----|
| IPI00031109  | NDUFAF2  | 20.1 | 4.65E-54  | 0.291 | 2  | 1.2   | Q2 |
| IPI00554481; | SLC3A2   | 31   | 7.71E-209 | 0.295 | 16 | 11.6  | Q2 |
| IPI00009841; | EWSR1    | 4.4  | 1.38E-19  | 0.297 | 2  | 4.7   | Q2 |
| IPI00218624; | SON      | 2.1  | 1.83E-28  | 0.311 | 3  | 13.2  | Q2 |
| IPI00021785  | COX5B    | 9.3  | 9.31E-11  | 0.312 | 2  | 27.3  | Q2 |
| IPI00657648; | EPDR1    | 11.9 | 8.74E-21  | 0.313 | 2  | 5.4   | Q2 |
| IPI00106495  | NCAPG    | 5.7  | 6.29E-47  | 0.315 | 3  | 19.3  | Q2 |
| IPI00217272; | AACS     | 7.6  | 1.16E-08  | 0.319 | 2  | 15.2  | Q2 |
| IPI00296353; | ARHGAP18 | 8.6  | 1.20E-32  | 0.326 | 3  | 6.0   | Q2 |
| IPI00014236; | SLC39A14 | 2.4  | 1.16E-05  | 0.327 | 2  | 14.9  | Q2 |
| IPI00871467; | L1CAM    | 4.1  | 7.94E-21  | 0.327 | 4  | 28.8  | Q2 |
| IPI00013214; | MCM3     | 19.8 | 7.23E-47  | 0.328 | 7  | 13.7  | Q2 |
| IPI00746934; | UBR4     | 14.8 | 5.80E-284 | 0.338 | 58 | 24.3  | Q2 |
| IPI00306043; | YTHDF2   | 8.8  | 1.10E-11  | 0.340 | 2  | 26.4  | Q2 |
| IPI00032003; | EMD      | 46.1 | 6.62E-250 | 0.342 | 6  | 21.0  | Q2 |
| IPI00295081; | TUBG1    | 19.5 | 5.31E-23  | 0.345 | 2  | 31.7  | Q2 |
| IPI00607584; | MYBBP1A  | 16.4 | 3.25E-147 | 0.346 | 13 | 13.4  | Q2 |
| IPI00021695; | ATP2B1   | 10.1 | <1.0E-304 | 0.354 | 4  | 4.9   | Q2 |
| IPI00400765; | KIAA1632 | 2.3  | 1.06E-15  | 0.379 | 3  | 5.2   | Q2 |
| IPI00647185; | CEP170   | 5.3  | 1.03E-20  | 0.389 | 3  | 15.3  | Q2 |
| IPI00027377; | ACAN     | 3.2  | 3.31E-11  | 0.394 | 5  | 11.6  | Q2 |
| IPI00298949; | GAK      | 3    | 1.00E-47  | 0.407 | 2  | 16.4  | Q2 |
| IPI00218247; | TIMP3    | 10   | 9.29E-05  | 0.418 | 3  | 22.7  | Q2 |
| IPI00878985; | INF2     | 22.3 | 7.64E-294 | 0.452 | 18 | 27.5  | Q2 |
| IPI00479145; | KRT19    | 29   | 2.01E-66  | 0.457 | 5  | 11.3  | Q2 |
| IPI00010136; | CTBP2    | 8.5  | 2.49E-21  | 0.544 | 2  | 62.1  | Q3 |
| IPI00290337; | EPS8     | 7.2  | 3.27E-58  | 0.580 | 2  | 41.8  | Q3 |
| IPI00022891; | SLC25A4  | 13.4 | 1.49E-124 | 0.905 | 2  | 95.4  | Q3 |
| IPI00032206; | PDLIM4   | 17.9 | 1.30E-11  | 0.928 | 2  | 99.4  | Q3 |
| IPI00170706; | TMEM2    | 3.5  | 7.78E-15  | 0.984 | 2  | 77.9  | Q3 |
| IPI00018415; | TM9SF2   | 3.5  | 1.18E-05  | 1.012 | 2  | 98.8  | Q3 |
| IPI00101186; | RRP12    | 4.1  | 3.25E-09  | 1.113 | 2  | 59.0  | Q3 |
| IPI00030847; | TM9SF3   | 11.2 | 1.97E-12  | 1.290 | 2  | 133.7 | Q3 |

|              |         |      |           |       |   |       |    |
|--------------|---------|------|-----------|-------|---|-------|----|
| IPI00294501  | DHCR7   | 13.1 | 3.49E-192 | 1.522 | 2 | 149.2 | Q3 |
| IPI00657706; | MBOAT7  | 5.1  | 4.33E-11  | 1.676 | 3 | 103.3 | Q3 |
| IPI00741030  | C8orf73 | 2.6  | 4.36E-02  | 4.041 | 5 | 103.1 | Q3 |
| IPI00792333; | IBTK    | 1    | 5.77E-04  | 4.055 | 2 | 110.5 | Q3 |

**Supplementary Table 2: Fibroblasts during cell culture.** Cell lysates were prepared from unlabeled (Arg0/Lys0), freshly isolated fibroblasts and labeled (Arg10/Lys8) fibroblasts after 14 cell doublings in culture (D14). Shown are normalized log2 transformed protein ratios of identified proteins. For identification a minimum of 2 peptides per protein has to be identified (unique + razor). The database used for identification was a decoy database based on IPI v. 3.59 containing in total 160,820 entries. As a criterium for identification the posterior error probability rate of identified proteins (PEP) is shown. The peptide numbers represent peptides used for quantitation.

| Protein ID  | Gene Symbol | Unique + Razor<br>Sequence Coverage<br>[%] | PEP       | Log2 Ratio | Peptide<br>No. | Variability [%] | Quantil |
|-------------|-------------|--------------------------------------------|-----------|------------|----------------|-----------------|---------|
| IPI00807625 | FNBP1       | 3.9                                        | 3.53E-05  | -4.334     | 2              | 17.4            | Q1      |
| IPI00916402 | AAK1        | 7.8                                        | 3.78E-20  | -4.273     | 2              | 113.0           | Q1      |
| IPI00021033 | COL3A1      | 11.1                                       | 5.91E-62  | -4.058     | 11             | 133.6           | Q1      |
| IPI00297655 | NOTCH2      | 0.6                                        | 2.50E-05  | -3.960     | 2              | 110.2           | Q1      |
| IPI00152007 | ARHGEF17    | 2.3                                        | 5.41E-09  | -3.841     | 8              | 145.0           | Q1      |
| IPI00438229 | TRIM28      | 28.5                                       | 1.59E-267 | -3.658     | 23             | 140.2           | Q1      |
| IPI00009841 | EWSR1       | 4.4                                        | 1.38E-19  | -3.552     | 2              | 2.3             | Q1      |
| IPI00784020 | ANKRD17     | 2.4                                        | 1.47E-76  | -3.546     | 2              | 105.3           | Q1      |
| IPI00006176 | HGS         | 14.9                                       | 3.54E-66  | -3.480     | 7              | 37.6            | Q1      |
| IPI00019205 | EAP1        | 5.8                                        | 2.14E-08  | -3.452     | 3              | 102.0           | Q1      |
| IPI00299738 | PCOLCE      | 14.7                                       | 2.19E-10  | -3.351     | 5              | 23.4            | Q1      |
| IPI00009322 | NEDD4       | 7.6                                        | 3.01E-18  | -3.268     | 3              | 154.7           | Q1      |
| IPI00019472 | SLC1A5      | 11.8                                       | 1.41E-78  | -3.241     | 5              | 45.5            | Q1      |
| IPI00005792 | PABPN1      | 12.1                                       | 5.48E-21  | -3.240     | 4              | 210.1           | Q1      |
| IPI00010740 | SFPQ        | 35.8                                       | <1.0E-304 | -3.229     | 39             | 204.6           | Q1      |
| IPI00021841 | APOA1       | 63                                         | 2.88E-110 | -3.218     | 16             | 84.8            | Q1      |
| IPI00007722 | AMPD2       | 13                                         | 1.94E-23  | -3.146     | 8              | 90.5            | Q1      |
| IPI00477611 | COL5A1      | 4.9                                        | 7.86E-32  | -3.137     | 3              | 270.5           | Q1      |
| IPI00641384 | SEC16A      | 3.3                                        | 7.70E-21  | -3.078     | 6              | 106.9           | Q1      |
| IPI00001734 | PSAT1       | 28.9                                       | 1.75E-60  | -2.857     | 13             | 7.9             | Q1      |
| IPI00060423 | CTHRC1      | 21                                         | 1.77E-22  | -2.848     | 4              | 9.6             | Q1      |
| IPI00444452 | MOV10       | 9.1                                        | 6.92E-32  | -2.772     | 7              | 112.3           | Q1      |
| IPI00220116 | OSBPL5      | 4.4                                        | 8.02E-13  | -2.771     | 3              | 101.3           | Q1      |
| IPI00647286 | C9orf88     | 36.7                                       | <1.0E-304 | -2.757     | 37             | 216.5           | Q1      |

|             |          |      |           |        |     |       |    |
|-------------|----------|------|-----------|--------|-----|-------|----|
| IPI00414008 | LMOD1    | 18.4 | 9.20E-85  | -2.723 | 13  | 166.1 | Q1 |
| IPI00023532 | SPATS2L  | 11.9 | 1.60E-117 | -2.713 | 2   | 12.4  | Q1 |
| IPI00030782 | STAT6    | 18.5 | 1.07E-62  | -2.699 | 10  | 214.4 | Q1 |
| IPI00816771 | WASH1    | 11.5 | 1.01E-35  | -2.663 | 2   | 19.6  | Q1 |
| IPI00220327 | KRT1     | 59.9 | 1.62E-281 | -2.599 | 113 | 158.4 | Q1 |
| IPI00298860 | LTF      | 51   | 8.02E-197 | -2.584 | 20  | 94.2  | Q1 |
| IPI00007960 | POSTN    | 4.2  | 5.53E-09  | -2.565 | 3   | 34.6  | Q1 |
| IPI00010463 | GTPBP1   | 5.7  | 5.74E-29  | -2.558 | 2   | 6.5   | Q1 |
| IPI00022488 | HPX      | 43.3 | 3.35E-140 | -2.554 | 16  | 129.8 | Q1 |
| IPI00251749 | NR3C1    | 3.9  | 1.09E-09  | -2.497 | 2   | 28.0  | Q1 |
| IPI00465431 | LGALS3   | 37.2 | 1.58E-67  | -2.473 | 22  | 208.2 | Q1 |
| IPI00013214 | MCM3     | 19.8 | 7.23E-47  | -2.468 | 11  | 203.4 | Q1 |
| IPI00654777 | EIF3F    | 37.6 | 4.58E-282 | -2.425 | 20  | 251.4 | Q1 |
| IPI00472160 | ARHGEF2  | 16.9 | 1.52E-87  | -2.411 | 12  | 34.2  | Q1 |
| IPI00003128 | P4HA2    | 45.6 | <1.0E-304 | -2.408 | 22  | 26.3  | Q1 |
| IPI00296635 | GBE1     | 43.6 | 5.90E-229 | -2.373 | 39  | 250.2 | Q1 |
| IPI00013174 | RBM14    | 13.6 | 1.76E-38  | -2.370 | 6   | 9.6   | Q1 |
| IPI00021695 | ATP2B1   | 10.1 | <1.0E-304 | -2.325 | 13  | 123.3 | Q1 |
| IPI00010400 | PLCB3    | 10.2 | 6.75E-128 | -2.318 | 5   | 235.8 | Q1 |
| IPI00782985 | EIF4G2   | 29.7 | 4.97E-117 | -2.281 | 24  | 146.8 | Q1 |
| IPI00306933 | MYO9B    | 5    | 1.68E-30  | -2.280 | 6   | 132.1 | Q1 |
| IPI00021692 | MBNL1    | 14.4 | 6.61E-13  | -2.251 | 8   | 142.5 | Q1 |
| IPI00829657 | ARHGAP17 | 8.4  | 2.41E-84  | -2.233 | 6   | 117.7 | Q1 |
| IPI00302647 | CC2D1A   | 5    | 2.69E-12  | -2.226 | 4   | 46.9  | Q1 |
| IPI00013070 | HNRNPUL1 | 21.4 | 1.23E-140 | -2.218 | 18  | 163.8 | Q1 |
| IPI00514856 | UBAP2L   | 18.4 | 2.15E-230 | -2.208 | 13  | 128.3 | Q1 |
| IPI00430622 | SPG20    | 9.2  | 1.74E-30  | -2.190 | 5   | 16.9  | Q1 |
| IPI00152503 | DTX3L    | 3.5  | 6.84E-06  | -2.186 | 2   | 16.6  | Q1 |
| IPI00746455 | FARP1    | 15.9 | 9.85E-75  | -2.179 | 13  | 156.6 | Q1 |
| IPI00289031 | FAM160B1 | 4.3  | 1.95E-07  | -2.177 | 4   | 57.8  | Q1 |
| IPI00023704 | LPP      | 21.1 | 1.58E-134 | -2.175 | 6   | 13.1  | Q1 |
| IPI00641582 | BAG3     | 7.7  | 4.88E-49  | -2.127 | 2   | 14.0  | Q1 |
| IPI00023122 | PDLIM7   | 31.1 | 8.05E-79  | -2.111 | 17  | 202.2 | Q1 |

|             |         |      |           |        |     |       |    |
|-------------|---------|------|-----------|--------|-----|-------|----|
| IPI00554777 | ASNS    | 20.9 | 3.90E-161 | -2.097 | 10  | 49.9  | Q1 |
| IPI00465084 | DES     | 52.3 | 9.20E-291 | -2.071 | 17  | 146.7 | Q1 |
| IPI00031812 | YBX1    | 40.4 | <1.0E-304 | -2.061 | 9   | 174.2 | Q1 |
| IPI00646361 | NUP214  | 4.3  | 1.35E-10  | -2.050 | 6   | 44.0  | Q1 |
| IPI00900324 | SYNPO2  | 13.7 | 5.79E-81  | -2.046 | 12  | 37.7  | Q1 |
| IPI00107357 | CLPTM1  | 7.4  | 2.46E-29  | -2.040 | 4   | 174.5 | Q1 |
| IPI00011200 | PHGDH   | 39   | 1.79E-229 | -2.028 | 20  | 48.1  | Q1 |
| IPI00218288 | SEC24D  | 15.7 | 8.40E-100 | -2.017 | 21  | 155.1 | Q1 |
| IPI00291607 | ITPR3   | 5    | 1.22E-35  | -2.012 | 5   | 40.0  | Q1 |
| IPI00746934 | UBR4    | 14.8 | 5.80E-284 | -2.008 | 68  | 135.4 | Q1 |
| IPI00103525 | PSPC1   | 17.8 | 2.43E-52  | -1.975 | 8   | 137.4 | Q1 |
| IPI00828125 | SMPD4   | 6    | 1.80E-17  | -1.939 | 2   | 56.9  | Q1 |
| IPI00871157 | SRPK2   | 3    | 6.12E-05  | -1.922 | 2   | 5.8   | Q1 |
| IPI00646954 | ENAH    | 6.5  | 2.10E-08  | -1.910 | 6   | 46.4  | Q1 |
| IPI00657938 | SNX18   | 14.7 | 3.27E-87  | -1.905 | 6   | 15.5  | Q1 |
| IPI00246058 | PDCD6IP | 53.8 | <1.0E-304 | -1.902 | 77  | 195.9 | Q1 |
| IPI00024709 | IKBKB   | 5    | 1.90E-07  | -1.890 | 2   | 3.2   | Q1 |
| IPI00026969 | SEC23IP | 9.7  | 3.99E-67  | -1.888 | 4   | 8.5   | Q1 |
| IPI00386114 | SF1     | 13.3 | 6.89E-48  | -1.885 | 7   | 166.4 | Q1 |
| IPI00376229 | PACS1   | 10.7 | 4.35E-36  | -1.863 | 8   | 134.0 | Q1 |
| IPI00641743 | HCFC1   | 4.3  | 1.01E-22  | -1.855 | 2   | 13.0  | Q1 |
| IPI00306043 | YTHDF2  | 8.8  | 1.10E-11  | -1.851 | 3   | 83.7  | Q1 |
| IPI00384265 | FAM120A | 27   | 2.92E-192 | -1.844 | 24  | 186.0 | Q1 |
| IPI00184330 | MCM2    | 20.8 | 3.62E-169 | -1.842 | 4   | 14.6  | Q1 |
| IPI00296485 | MAP1S   | 5.6  | 1.31E-17  | -1.828 | 4   | 26.1  | Q1 |
| IPI00026813 | FNTA    | 6.6  | 3.94E-10  | -1.812 | 3   | 134.3 | Q1 |
| IPI00853369 | PLXNB2  | 7.1  | 2.38E-84  | -1.807 | 9   | 81.2  | Q1 |
| IPI00030851 | SEC24B  | 6.8  | 2.54E-89  | -1.792 | 6   | 155.0 | Q1 |
| IPI00307545 | TNS1    | 12.6 | 1.13E-147 | -1.778 | 12  | 113.1 | Q1 |
| IPI00030654 | CPSF6   | 14.3 | 4.36E-134 | -1.769 | 4   | 66.3  | Q1 |
| IPI00021338 | DLAT    | 18.2 | 6.94E-74  | -1.761 | 11  | 214.4 | Q1 |
| IPI00328257 | AP1B1   | 25.5 | <1.0E-304 | -1.748 | 15  | 99.7  | Q1 |
| IPI00297646 | COL1A1  | 46.7 | <1.0E-304 | -1.741 | 100 | 236.7 | Q1 |



|             |          |      |           |        |    |       |    |
|-------------|----------|------|-----------|--------|----|-------|----|
| IPI00017592 | LETM1    | 22.1 | 8.37E-122 | -1.728 | 8  | 122.0 | Q1 |
| IPI00873875 | SH3KBP1  | 5.6  | 8.85E-17  | -1.700 | 3  | 197.4 | Q1 |
| IPI00400765 | KIAA1632 | 2.3  | 1.06E-15  | -1.677 | 5  | 25.9  | Q1 |
| IPI00645431 | BAT3     | 6.9  | 7.48E-94  | -1.670 | 7  | 117.3 | Q1 |
| IPI00218729 | DLG1     | 4.6  | 2.48E-13  | -1.652 | 3  | 14.4  | Q1 |
| IPI00018946 | PANK4    | 4    | 2.98E-09  | -1.644 | 2  | 22.3  | Q1 |
| IPI00031821 | ITM2B    | 7.5  | 8.12E-05  | -1.643 | 2  | 17.3  | Q1 |
| IPI00376317 | EDC4     | 8.3  | 1.26E-50  | -1.640 | 5  | 24.8  | Q1 |
| IPI00166132 | VPS52    | 6.1  | 3.68E-27  | -1.631 | 2  | 6.4   | Q1 |
| IPI00554481 | SLC3A2   | 31   | 7.71E-209 | -1.625 | 21 | 58.1  | Q1 |
| IPI00006091 | DMD      | 0.3  | 1.12E-02  | -1.619 | 2  | 21.1  | Q1 |
| IPI00006025 | SART3    | 15.9 | 1.59E-54  | -1.612 | 7  | 169.8 | Q1 |
| IPI00014149 | TTC35    | 19.9 | 1.59E-47  | -1.607 | 2  | 157.4 | Q1 |
| IPI00216219 | TJP1     | 13.6 | 9.79E-84  | -1.606 | 13 | 78.1  | Q1 |
| IPI00083708 | BAT2D1   | 2.1  | 4.44E-09  | -1.605 | 4  | 11.3  | Q1 |
| IPI00012490 | ATP2B4   | 36.5 | <1.0E-304 | -1.599 | 57 | 146.6 | Q1 |
| IPI00031410 | FRAP1    | 4.6  | 5.57E-40  | -1.595 | 5  | 35.8  | Q1 |
| IPI00295457 | MPRIP    | 36.4 | 1.30E-257 | -1.584 | 19 | 73.3  | Q1 |
| IPI00031627 | POLR2A   | 5.1  | 4.16E-25  | -1.583 | 6  | 135.2 | Q1 |
| IPI00298292 | PTK7     | 24.8 | 6.07E-212 | -1.573 | 40 | 142.4 | Q1 |
| IPI00646493 | COPA     | 57.1 | <1.0E-304 | -1.570 | 86 | 200.2 | Q1 |
| IPI00923606 | EPRS     | 44.3 | <1.0E-304 | -1.564 | 62 | 151.7 | Q1 |
| IPI00007935 | PDLIM5   | 37.8 | 5.02E-112 | -1.556 | 18 | 131.9 | Q1 |
| IPI00306791 | SORBS1   | 3.4  | 1.15E-16  | -1.555 | 3  | 41.5  | Q1 |
| IPI00027808 | POLR2B   | 10.5 | 1.50E-24  | -1.542 | 8  | 15.1  | Q1 |
| IPI00550308 | RBM12    | 6.1  | 1.58E-05  | -1.532 | 4  | 17.5  | Q1 |
| IPI00642329 | MFN2     | 2.2  | 4.73E-03  | -1.531 | 3  | 128.4 | Q1 |
| IPI00291802 | LMO7     | 47.7 | <1.0E-304 | -1.530 | 54 | 121.6 | Q1 |
| IPI00333913 | NBAS     | 5.8  | 1.80E-40  | -1.496 | 10 | 99.6  | Q1 |
| IPI00017292 | CTNNB1   | 36.9 | <1.0E-304 | -1.492 | 27 | 66.5  | Q1 |
| IPI00299608 | PSMD1    | 32.2 | 3.94E-298 | -1.489 | 27 | 148.4 | Q1 |
| IPI00300725 | KRT6A    | 27   | 6.82E-61  | -1.478 | 4  | 31.9  | Q1 |
| IPI00293533 | NUP62    | 15.3 | 3.27E-140 | -1.469 | 3  | 6.6   | Q1 |

|             |          |      |           |        |    |       |    |
|-------------|----------|------|-----------|--------|----|-------|----|
| IPI00333067 | HERC4    | 11.5 | 2.32E-26  | -1.458 | 6  | 53.3  | Q1 |
| IPI00023673 | LGALS3BP | 7.4  | 1.68E-05  | -1.442 | 2  | 5.5   | Q1 |
| IPI00034006 | PTPN23   | 11.3 | 1.23E-126 | -1.438 | 11 | 47.4  | Q1 |
| IPI00743931 | GORASP2  | 9.5  | 1.77E-36  | -1.436 | 2  | 23.2  | Q1 |
| IPI00827972 | PARF     | 7.4  | 2.08E-08  | -1.436 | 3  | 83.9  | Q1 |
| IPI00021264 | CNN1     | 42.4 | 1.67E-126 | -1.435 | 14 | 55.7  | Q1 |
| IPI00179298 | HUWE1    | 12.5 | <1.0E-304 | -1.426 | 37 | 116.6 | Q1 |
| IPI00414320 | ANXA11   | 27.4 | 1.52E-201 | -1.417 | 35 | 203.5 | Q1 |
| IPI00607584 | MYBBP1A  | 16.4 | 3.25E-147 | -1.412 | 11 | 27.2  | Q1 |
| IPI00015973 | EPB41L2  | 20.2 | 4.33E-153 | -1.401 | 16 | 83.8  | Q1 |
| IPI00008603 | ACTA2    | 2.9  | <1.0E-304 | -1.398 | 2  | 2.1   | Q1 |
| IPI00449049 | PARP1    | 27.1 | 3.42E-161 | -1.392 | 17 | 70.3  | Q1 |
| IPI00012382 | SNRPA    | 13.1 | 5.84E-07  | -1.388 | 4  | 173.6 | Q1 |
| IPI00166010 | CNOT1    | 8.5  | 2.86E-53  | -1.388 | 14 | 130.3 | Q1 |
| IPI00872209 | PPP3CA   | 19.3 | 3.00E-62  | -1.370 | 14 | 46.9  | Q1 |
| IPI00157757 | MICAL1   | 18.5 | 1.51E-126 | -1.358 | 14 | 138.1 | Q1 |
| IPI00783931 | COL18A1  | 1.1  | 1.56E-05  | -1.343 | 2  | 0.2   | Q1 |
| IPI00479786 | KHSRP    | 40.8 | 5.71E-206 | -1.342 | 17 | 148.3 | Q1 |
| IPI00921422 | CKAP5    | 19.4 | 1.60E-233 | -1.340 | 25 | 77.6  | Q1 |
| IPI00852659 | EML3     | 2.1  | 2.10E-04  | -1.338 | 2  | 4.0   | Q1 |
| IPI00219078 | ATP2A2   | 33   | <1.0E-304 | -1.324 | 53 | 119.1 | Q1 |
| IPI00719178 | ABCC1    | 9.1  | 1.28E-77  | -1.323 | 7  | 112.4 | Q1 |
| IPI00298308 | ALDH1L2  | 44.5 | <1.0E-304 | -1.317 | 35 | 39.4  | Q1 |
| IPI00026625 | NUP155   | 9.5  | 5.81E-38  | -1.309 | 11 | 187.6 | Q1 |
| IPI00102864 | HK2      | 8    | 4.45E-85  | -1.299 | 6  | 48.2  | Q1 |
| IPI00902584 | VASP     | 29.9 | 1.50E-97  | -1.297 | 14 | 149.7 | Q1 |
| IPI00018434 | TSG101   | 20.8 | 3.34E-39  | -1.293 | 3  | 35.8  | Q1 |
| IPI00295400 | WARS     | 60.5 | <1.0E-304 | -1.289 | 21 | 53.5  | Q1 |
| IPI00333770 | DOCK10   | 1.2  | 2.29E-10  | -1.287 | 2  | 26.7  | Q1 |
| IPI00019178 | PSPH     | 13.8 | 6.03E-08  | -1.284 | 3  | 27.2  | Q1 |
| IPI00157790 | ECM29    | 17.2 | 3.99E-221 | -1.283 | 25 | 185.1 | Q1 |
| IPI00654605 | MAP7D1   | 7.6  | 7.01E-71  | -1.276 | 3  | 7.0   | Q1 |
| IPI00004409 | DDR2     | 8    | 2.24E-24  | -1.266 | 3  | 20.8  | Q1 |

|             |           |      |           |        |     |       |    |
|-------------|-----------|------|-----------|--------|-----|-------|----|
| IPI00021453 | PPAP2B    | 7.1  | 8.65E-04  | -1.260 | 2   | 10.4  | Q1 |
| IPI00290542 | STAM2     | 7    | 9.43E-55  | -1.257 | 2   | 23.2  | Q1 |
| IPI00298289 | RTN4      | 43.4 | 3.49E-192 | -1.251 | 17  | 207.1 | Q1 |
| IPI00002335 | HTT       | 2.8  | 4.22E-10  | -1.249 | 4   | 192.5 | Q1 |
| IPI00797038 | PCK2      | 31.2 | 3.47E-231 | -1.239 | 16  | 25.8  | Q1 |
| IPI00171798 | MTA2      | 10.5 | 1.97E-13  | -1.236 | 3   | 61.1  | Q1 |
| IPI00414315 | EPS8L2    | 6.7  | 4.49E-15  | -1.228 | 3   | 30.0  | Q1 |
| IPI00639957 | CARM1     | 22   | 2.08E-64  | -1.225 | 5   | 37.0  | Q1 |
| IPI00852685 | DIAPH1    | 13.9 | 3.01E-69  | -1.224 | 10  | 135.9 | Q1 |
| IPI00395605 | ARHGEF1   | 14.7 | 6.64E-55  | -1.213 | 6   | 18.3  | Q1 |
| IPI00410287 | PRKAA1    | 10.8 | 1.88E-73  | -1.199 | 3   | 12.1  | Q1 |
| IPI00143753 | SR140     | 7.4  | 2.36E-105 | -1.194 | 5   | 55.1  | Q1 |
| IPI00010800 | NES       | 34.9 | <1.0E-304 | -1.184 | 57  | 70.7  | Q1 |
| IPI00514311 | CTTNBP2NL | 11.6 | 6.78E-17  | -1.183 | 7   | 14.5  | Q1 |
| IPI00852741 | SEC31A    | 28.1 | 4.10E-275 | -1.177 | 62  | 119.6 | Q1 |
| IPI00152658 | NEK7      | 29.5 | 5.52E-32  | -1.176 | 8   | 46.0  | Q1 |
| IPI00297578 | FILIP1L   | 3.5  | 1.71E-11  | -1.175 | 4   | 24.3  | Q1 |
| IPI00021048 | MYOF      | 58.8 | <1.0E-304 | -1.172 | 226 | 151.5 | Q1 |
| IPI00020632 | ASS1      | 21.8 | 2.16E-81  | -1.170 | 12  | 27.8  | Q1 |
| IPI00006666 | SLC16A3   | 10.5 | 2.87E-14  | -1.159 | 5   | 16.5  | Q1 |
| IPI00007253 | KIAA1012  | 1.7  | 1.08E-04  | -1.133 | 2   | 12.3  | Q1 |
| IPI00337495 | PLOD2     | 25.5 | 2.82E-116 | -1.126 | 18  | 18.9  | Q1 |
| IPI00296099 | THBS1     | 40.8 | <1.0E-304 | -1.116 | 87  | 151.5 | Q1 |
| IPI00784366 | AP2B1     | 51.4 | <1.0E-304 | -1.114 | 54  | 155.5 | Q1 |
| IPI00604464 | UBE3C     | 6.6  | 1.02E-21  | -1.114 | 8   | 37.2  | Q1 |
| IPI00002957 | TBC1D17   | 6.3  | 2.54E-12  | -1.114 | 2   | 2.9   | Q1 |
| IPI00100030 | PIGT      | 7.1  | 2.74E-02  | -1.111 | 3   | 3.1   | Q1 |
| IPI00217661 | RAVER1    | 6.1  | 1.70E-24  | -1.107 | 3   | 2.8   | Q1 |
| IPI00328350 | FAM129A   | 18   | 2.53E-123 | -1.096 | 14  | 17.6  | Q1 |
| IPI00219825 | PSAP      | 9.1  | 8.22E-72  | -1.092 | 7   | 79.8  | Q1 |
| IPI00604647 | MAP4K4    | 9.8  | 2.45E-21  | -1.091 | 7   | 32.9  | Q1 |
| IPI00020513 | ZYX       | 46.7 | <1.0E-304 | -1.086 | 41  | 121.4 | Q1 |
| IPI00873472 | SEC24A    | 10   | 1.91E-111 | -1.082 | 11  | 30.5  | Q1 |

|             |          |      |           |        |    |       |    |
|-------------|----------|------|-----------|--------|----|-------|----|
| IPI00878985 | INF2     | 22.3 | 7.64E-294 | -1.082 | 20 | 228.2 | Q1 |
| IPI00746655 | FAM62A   | 45.6 | <1.0E-304 | -1.073 | 76 | 130.8 | Q1 |
| IPI00411426 | VPS26A   | 27.8 | 1.75E-184 | -1.073 | 6  | 142.7 | Q1 |
| IPI00782992 | SRRM2    | 5.3  | 4.30E-91  | -1.072 | 7  | 81.2  | Q1 |
| IPI00007928 | PRPF8    | 27.3 | <1.0E-304 | -1.070 | 66 | 135.3 | Q1 |
| IPI00409635 | FAM62B   | 16.3 | 3.42E-174 | -1.054 | 12 | 87.1  | Q1 |
| IPI00913848 | FERMT2   | 53.6 | <1.0E-304 | -1.042 | 42 | 70.7  | Q1 |
| IPI00023330 | KIAA1468 | 6.5  | 4.00E-33  | -1.040 | 3  | 2.2   | Q1 |
| IPI00889541 | DDX17    | 37.6 | 5.93E-301 | -1.035 | 39 | 68.8  | Q1 |
| IPI00306380 | GNL3     | 10.4 | 9.00E-08  | -1.027 | 2  | 6.5   | Q1 |
| IPI00215893 | HMOX1    | 51.4 | 8.99E-195 | -1.023 | 12 | 24.6  | Q1 |
| IPI00299468 | SCD      | 10.3 | 4.01E-27  | -1.018 | 2  | 1.2   | Q1 |
| IPI00031697 | TMEM109  | 12.8 | 9.72E-18  | -1.008 | 5  | 50.6  | Q1 |
| IPI00855787 | TNKS1BP1 | 26.3 | <1.0E-304 | -0.997 | 30 | 82.2  | Q1 |
| IPI00030774 | TBCD     | 18.8 | 1.18E-63  | -0.995 | 10 | 124.9 | Q1 |
| IPI00328243 | PLD3     | 10.2 | 5.88E-44  | -0.991 | 7  | 20.7  | Q1 |
| IPI00789041 | PNN      | 6.7  | 6.44E-24  | -0.989 | 2  | 6.6   | Q1 |
| IPI00217490 | FNDC3B   | 8.2  | 1.10E-55  | -0.989 | 8  | 63.8  | Q1 |
| IPI00643591 | AP1G1    | 34.7 | 1.81E-149 | -0.987 | 18 | 123.8 | Q1 |
| IPI00008998 | PTPLAD1  | 13.8 | 7.34E-41  | -0.986 | 4  | 19.4  | Q1 |
| IPI00007074 | YARS     | 50.9 | 2.43E-171 | -0.985 | 21 | 16.5  | Q1 |
| IPI00008223 | RAD23B   | 22.7 | 2.79E-145 | -0.985 | 16 | 153.6 | Q1 |
| IPI00024006 | PIK3R4   | 3.7  | 3.75E-18  | -0.982 | 4  | 41.5  | Q1 |
| IPI00872773 | ERO1L    | 23.3 | 1.49E-91  | -0.981 | 9  | 159.8 | Q1 |
| IPI00298058 | SUPT5H   | 10.6 | 3.52E-94  | -0.972 | 3  | 42.9  | Q1 |
| IPI00027681 | NNMT     | 45.1 | 2.07E-134 | -0.960 | 20 | 158.9 | Q1 |
| IPI00298851 | CD151    | 9.1  | 6.18E-03  | -0.957 | 2  | 44.6  | Q1 |
| IPI00009505 | SNTB2    | 10.6 | 4.88E-28  | -0.954 | 2  | 33.1  | Q1 |
| IPI00022597 | UBE2M    | 35.5 | 5.42E-80  | -0.952 | 7  | 61.6  | Q1 |
| IPI00100980 | EHD2     | 79.4 | <1.0E-304 | -0.951 | 51 | 116.0 | Q1 |
| IPI00027442 | AARS     | 49.7 | <1.0E-304 | -0.938 | 59 | 60.1  | Q1 |
| IPI00396279 | CLASP1   | 4.2  | 9.75E-15  | -0.936 | 3  | 6.4   | Q1 |
| IPI00031583 | USO1     | 34.8 | <1.0E-304 | -0.936 | 24 | 17.1  | Q1 |

|             |              |      |           |        |     |       |    |
|-------------|--------------|------|-----------|--------|-----|-------|----|
| IPI00012268 | PSMD2        | 45.5 | <1.0E-304 | -0.932 | 48  | 83.0  | Q1 |
| IPI00926820 | SLC4A7       | 2.3  | 2.54E-15  | -0.930 | 2   | 33.1  | Q1 |
| IPI00002460 | ANXA7        | 30.5 | 2.14E-96  | -0.929 | 20  | 138.6 | Q1 |
| IPI00477763 | CDC42BPB     | 11.9 | 1.49E-78  | -0.926 | 9   | 42.1  | Q1 |
| IPI00028946 | RTN3         | 15.3 | 6.46E-11  | -0.918 | 4   | 142.9 | Q1 |
| IPI00303868 | GYS1         | 12.1 | 2.55E-31  | -0.913 | 5   | 14.8  | Q1 |
| IPI00783781 | NUP205       | 7    | 2.08E-44  | -0.911 | 6   | 31.5  | Q1 |
| IPI00647217 | SKIV2L2      | 8.2  | 6.30E-12  | -0.911 | 2   | 18.1  | Q1 |
| IPI00657953 | TRIO         | 4.5  | 1.13E-42  | -0.909 | 9   | 34.1  | Q1 |
| IPI00016621 | AP2A2        | 25   | <1.0E-304 | -0.908 | 16  | 225.3 | Q1 |
| IPI00017451 | SF3A1        | 29.9 | 2.09E-173 | -0.905 | 17  | 55.5  | Q1 |
| IPI00103509 | NDUFA10      | 9.3  | 5.26E-06  | -0.902 | 2   | 47.7  | Q1 |
| IPI00879193 | TTC28        | 1.3  | 1.14E-03  | -0.900 | 2   | 20.8  | Q1 |
| IPI00644127 | IARS         | 43.9 | <1.0E-304 | -0.898 | 49  | 78.8  | Q1 |
| IPI00396015 | ACACA        | 14.2 | 2.73E-169 | -0.896 | 12  | 14.6  | Q1 |
| IPI00385267 | SRPR         | 26.8 | 1.46E-73  | -0.894 | 5   | 19.5  | Q1 |
| IPI00915356 | CPSF7        | 10.9 | 5.66E-99  | -0.889 | 3   | 33.3  | Q1 |
| IPI00784808 | Ov/Br septin | 54.2 | <1.0E-304 | -0.889 | 33  | 104.3 | Q1 |
| IPI00019383 | GALK1        | 14.7 | 1.36E-27  | -0.886 | 3   | 10.0  | Q1 |
| IPI00007675 | DYNC1LI1     | 14.3 | 9.42E-74  | -0.882 | 3   | 32.1  | Q1 |
| IPI00816415 | AKAP2        | 19.6 | 6.88E-261 | -0.878 | 16  | 61.7  | Q1 |
| IPI00301323 | DDX18        | 12.8 | 7.14E-29  | -0.878 | 5   | 25.2  | Q1 |
| IPI00163851 | EIF2AK4      | 4.2  | 2.60E-09  | -0.874 | 4   | 39.5  | Q1 |
| IPI00914871 | SERPINE2     | 16.1 | 1.92E-98  | -0.874 | 2   | 38.1  | Q1 |
| IPI00060715 | KCTD12       | 18.5 | 3.13E-24  | -0.857 | 7   | 30.0  | Q1 |
| IPI00909417 | IFI16        | 33.4 | 5.06E-218 | -0.853 | 23  | 75.5  | Q1 |
| IPI00289334 | FLNB         | 53.3 | <1.0E-304 | -0.851 | 128 | 95.9  | Q1 |
| IPI00376259 | SRGAP1       | 3.5  | 2.12E-66  | -0.841 | 3   | 32.3  | Q1 |
| IPI00242630 | HEATR2       | 5    | 7.68E-12  | -0.837 | 5   | 113.3 | Q1 |
| IPI00844303 | UNC84A       | 6    | 3.94E-09  | -0.834 | 4   | 25.6  | Q1 |
| IPI00016405 | OCIAD1       | 22.9 | 9.99E-43  | -0.819 | 4   | 9.2   | Q1 |
| IPI00376344 | MYO1B        | 24.6 | 1.52E-266 | -0.815 | 28  | 76.2  | Q1 |
| IPI00872533 | CD2AP        | 8.5  | 9.82E-06  | -0.815 | 3   | 24.4  | Q1 |

|             |               |      |           |        |    |       |    |
|-------------|---------------|------|-----------|--------|----|-------|----|
| IPI00012079 | EIF4B         | 27.4 | 1.47E-129 | -0.815 | 11 | 25.1  | Q1 |
| IPI00024425 | KIAA0664      | 5.1  | 2.33E-27  | -0.810 | 4  | 6.7   | Q1 |
| IPI00005158 | LONP1         | 26.6 | 7.53E-273 | -0.810 | 28 | 117.6 | Q1 |
| IPI00295940 | UNC84B        | 20.6 | 1.95E-249 | -0.808 | 12 | 38.5  | Q1 |
| IPI00024279 | HEATR1        | 4.4  | 4.16E-27  | -0.806 | 8  | 61.7  | Q1 |
| IPI00220031 | PXN           | 15.4 | 3.69E-123 | -0.802 | 7  | 9.5   | Q1 |
| IPI00745406 | SPAG9         | 19.7 | 2.30E-111 | -0.801 | 12 | 30.5  | Q1 |
| IPI00783872 | CAPRIN1       | 17.8 | 2.01E-150 | -0.797 | 13 | 12.7  | Q1 |
| IPI00034049 | UPF1          | 37.7 | 5.12E-257 | -0.795 | 29 | 114.8 | Q1 |
| IPI00305068 | PRPF6         | 13.8 | 1.13E-96  | -0.792 | 10 | 14.8  | Q1 |
| IPI00306290 | XPOT          | 24.3 | 2.73E-251 | -0.788 | 14 | 21.7  | Q1 |
| IPI00220754 | ADD3          | 20   | 1.05E-107 | -0.787 | 8  | 67.8  | Q1 |
| IPI00304267 | NXN           | 26.9 | 1.33E-117 | -0.785 | 6  | 138.4 | Q1 |
| IPI00221106 | SF3B2         | 24.9 | 3.77E-97  | -0.783 | 16 | 107.0 | Q1 |
| IPI00896498 | MMP14         | 27.1 | 1.89E-192 | -0.778 | 18 | 68.5  | Q1 |
| IPI00008708 | RSL1D1        | 13.5 | 1.27E-56  | -0.772 | 4  | 8.0   | Q1 |
| IPI00001914 | FKBP7         | 22.8 | 1.98E-49  | -0.768 | 5  | 8.2   | Q1 |
| IPI00444371 | WDR44         | 7.2  | 7.66E-19  | -0.768 | 3  | 18.4  | Q1 |
| IPI00848334 | KIF2A         | 8.5  | 3.58E-39  | -0.768 | 7  | 6.0   | Q1 |
| IPI00328170 | MOGS          | 35.1 | 7.51E-178 | -0.766 | 17 | 11.1  | Q1 |
| IPI00179473 | SQSTM1        | 26.6 | 5.98E-227 | -0.762 | 2  | 5.5   | Q1 |
| IPI00016725 | GTF3C4        | 3.2  | 4.58E-06  | -0.756 | 2  | 4.9   | Q1 |
| IPI00003802 | MAN2A1        | 8.6  | 3.63E-57  | -0.754 | 2  | 24.0  | Q1 |
| IPI00006663 | ALDH2         | 19.7 | 1.12E-149 | -0.753 | 4  | 15.1  | Q1 |
| IPI00396171 | MAP4          | 49.7 | <1.0E-304 | -0.744 | 81 | 96.9  | Q1 |
| IPI00300096 | RAB35         | 17.4 | 3.37E-49  | -0.741 | 2  | 50.7  | Q1 |
| IPI00029267 | SNRPB2        | 20.4 | 1.69E-14  | -0.740 | 7  | 179.2 | Q1 |
| IPI00397904 | NUP93         | 29.5 | 4.30E-236 | -0.730 | 15 | 19.3  | Q1 |
| IPI00328715 | MTDH          | 16.5 | 9.43E-104 | -0.726 | 6  | 13.8  | Q1 |
| IPI00027443 | DKFZp686F1612 | 30.7 | 6.65E-161 | -0.724 | 18 | 12.0  | Q1 |
| IPI00020178 | STAM          | 13.3 | 7.14E-123 | -0.724 | 5  | 19.3  | Q1 |
| IPI00018235 | PEF1          | 20.8 | 2.82E-27  | -0.723 | 4  | 4.0   | Q1 |
| IPI00299512 | NF1           | 1.4  | 5.79E-08  | -0.721 | 2  | 19.9  | Q1 |

|             |          |      |           |        |    |       |    |
|-------------|----------|------|-----------|--------|----|-------|----|
| IPI00022164 | ARHGEF12 | 1.6  | 1.21E-03  | -0.721 | 2  | 75.7  | Q1 |
| IPI00640197 | TPP2     | 38.2 | <1.0E-304 | -0.709 | 31 | 78.9  | Q1 |
| IPI00004839 | CRKL     | 29   | 4.02E-86  | -0.704 | 4  | 1.3   | Q1 |
| IPI00783271 | LRPPRC   | 55.6 | <1.0E-304 | -0.702 | 63 | 140.1 | Q1 |
| IPI00031023 | FLII     | 22.5 | 2.99E-229 | -0.695 | 22 | 108.5 | Q1 |
| IPI00015836 | APPL1    | 15.5 | 4.85E-72  | -0.695 | 5  | 17.8  | Q1 |
| IPI00301051 | NHLRC2   | 13.2 | 2.80E-72  | -0.695 | 5  | 8.5   | Q1 |
| IPI00760962 | KANK2    | 33.1 | 9.77E-272 | -0.690 | 38 | 115.0 | Q1 |
| IPI00418313 | ILF3     | 36.2 | <1.0E-304 | -0.689 | 43 | 131.3 | Q1 |
| IPI00024305 | SMAD3    | 10.8 | 5.17E-25  | -0.685 | 4  | 28.7  | Q1 |
| IPI00059279 | EXOC4    | 15.8 | 2.74E-83  | -0.678 | 9  | 19.1  | Q1 |
| IPI00216247 | PSMD4    | 16.8 | 1.12E-61  | -0.675 | 4  | 9.2   | Q1 |
| IPI00002804 | PKN2     | 4.2  | 4.88E-18  | -0.671 | 2  | 66.5  | Q1 |
| IPI00307359 | OSBPL9   | 3    | 2.86E-06  | -0.670 | 2  | 43.6  | Q1 |
| IPI00296713 | GRN      | 3.9  | 1.10E-14  | -0.667 | 2  | 4.8   | Q1 |
| IPI00166738 | ZADH2    | 6.4  | 9.20E-06  | -0.665 | 2  | 47.6  | Q1 |
| IPI00477231 | MGEA5    | 9.1  | 4.55E-34  | -0.665 | 8  | 11.9  | Q1 |
| IPI00023832 | SH3PXD2B | 11   | 2.03E-95  | -0.664 | 8  | 13.5  | Q1 |
| IPI00783982 | COPG     | 52.7 | <1.0E-304 | -0.663 | 61 | 85.0  | Q1 |
| IPI00377050 | COG5     | 5.9  | 8.72E-29  | -0.659 | 2  | 25.5  | Q1 |
| IPI00903328 | AGFG1    | 4.1  | 8.56E-08  | -0.657 | 2  | 7.5   | Q1 |
| IPI00472164 | WASF2    | 6.8  | 2.63E-47  | -0.654 | 2  | 257.4 | Q1 |
| IPI00008868 | MAP1B    | 39.5 | <1.0E-304 | -0.649 | 94 | 58.6  | Q1 |
| IPI00004838 | CRK      | 28   | 1.44E-134 | -0.647 | 10 | 125.0 | Q1 |
| IPI00334011 | EML1     | 3.6  | 4.52E-14  | -0.647 | 2  | 21.5  | Q1 |
| IPI00221235 | NUP160   | 9.7  | 4.21E-101 | -0.646 | 10 | 70.7  | Q1 |
| IPI00410067 | ZC3HAV1  | 13.4 | 7.28E-116 | -0.643 | 7  | 9.1   | Q1 |
| IPI00307259 | DNAJC13  | 26.4 | <1.0E-304 | -0.641 | 56 | 93.9  | Q1 |
| IPI00106495 | NCAPG    | 5.7  | 6.29E-47  | -0.640 | 3  | 14.5  | Q1 |
| IPI00334715 | GRLF1    | 5.4  | 2.28E-12  | -0.638 | 5  | 18.9  | Q1 |
| IPI00028264 | EXOC8    | 5.7  | 6.95E-06  | -0.638 | 2  | 29.7  | Q1 |
| IPI00883897 | RELA     | 9    | 7.40E-09  | -0.637 | 2  | 55.5  | Q1 |
| IPI00007797 | FABP5    | 33.3 | 2.34E-10  | -0.635 | 4  | 5.9   | Q1 |

|             |         |      |           |        |    |       |    |
|-------------|---------|------|-----------|--------|----|-------|----|
| IPI00000634 | CCDC6   | 8.7  | 1.41E-15  | -0.634 | 2  | 7.3   | Q1 |
| IPI00893918 | VARS    | 33.2 | <1.0E-304 | -0.633 | 36 | 122.9 | Q1 |
| IPI00464952 | SFRS11  | 5.2  | 1.54E-16  | -0.626 | 4  | 16.5  | Q1 |
| IPI00020356 | MAP1A   | 15.2 | <1.0E-304 | -0.626 | 31 | 74.5  | Q1 |
| IPI00033030 | ADRM1   | 9.1  | 1.52E-19  | -0.625 | 3  | 140.5 | Q1 |
| IPI00412343 | FMR1    | 6.3  | 3.21E-14  | -0.617 | 2  | 2.0   | Q1 |
| IPI00333215 | TCEA1   | 15   | 1.25E-33  | -0.613 | 2  | 9.3   | Q1 |
| IPI00644386 | FUBP1   | 34.5 | 2.13E-254 | -0.612 | 12 | 17.8  | Q1 |
| IPI00152695 | WDR82   | 17.3 | 1.06E-41  | -0.610 | 3  | 12.7  | Q1 |
| IPI00384444 | KRT14   | 36.4 | 6.18E-85  | -0.603 | 13 | 121.3 | Q1 |
| IPI00409671 | DDX42   | 16   | 7.44E-92  | -0.601 | 9  | 9.2   | Q1 |
| IPI00001466 | EML4    | 12.7 | 2.49E-56  | -0.599 | 12 | 26.7  | Q1 |
| IPI00783097 | GARS    | 57.5 | <1.0E-304 | -0.599 | 55 | 14.4  | Q1 |
| IPI00023103 | DVL2    | 8.4  | 6.94E-08  | -0.597 | 3  | 20.8  | Q1 |
| IPI00247871 | TCERG1  | 8.7  | 1.86E-15  | -0.596 | 4  | 47.1  | Q1 |
| IPI00410259 | PHLDB2  | 2.8  | 6.93E-15  | -0.596 | 3  | 17.6  | Q1 |
| IPI00032050 | WBP2    | 11.5 | 9.22E-08  | -0.590 | 2  | 20.0  | Q1 |
| IPI00016112 | PXDN    | 11.8 | 1.15E-104 | -0.589 | 10 | 15.9  | Q1 |
| IPI00217413 | DHX29   | 5.3  | 1.01E-14  | -0.587 | 6  | 9.3   | Q1 |
| IPI00221325 | RANBP2  | 8.7  | 2.36E-186 | -0.587 | 13 | 39.4  | Q1 |
| IPI00099550 | UBQLN1  | 21.2 | 6.58E-85  | -0.586 | 4  | 10.8  | Q1 |
| IPI00018963 | PARVA   | 25.8 | 2.33E-243 | -0.586 | 13 | 59.3  | Q1 |
| IPI00376976 | ASAP1   | 6.4  | 4.75E-29  | -0.585 | 6  | 13.9  | Q1 |
| IPI00217357 | CCAR1   | 5.7  | 3.04E-21  | -0.585 | 4  | 13.3  | Q1 |
| IPI00012069 | NQO1    | 36.9 | 2.41E-101 | -0.584 | 17 | 49.8  | Q1 |
| IPI00011454 | GANAB   | 55.2 | <1.0E-304 | -0.583 | 99 | 119.8 | Q1 |
| IPI00027378 | UBXN1   | 27.3 | 3.78E-166 | -0.582 | 4  | 9.6   | Q1 |
| IPI00332106 | PBXIP1  | 21.9 | 1.86E-146 | -0.581 | 13 | 15.5  | Q1 |
| IPI00008219 | RAD23A  | 12.7 | 1.82E-50  | -0.581 | 3  | 14.2  | Q1 |
| IPI00103247 | HNRPLL  | 10   | 2.86E-26  | -0.580 | 2  | 17.3  | Q1 |
| IPI00442344 | SLC27A1 | 5.4  | 6.97E-18  | -0.577 | 2  | 7.4   | Q1 |
| IPI00847241 | LARP5   | 5.8  | 1.19E-17  | -0.571 | 2  | 8.9   | Q1 |
| IPI00029111 | LCRMP   | 44   | <1.0E-304 | -0.570 | 23 | 14.8  | Q1 |



|             |               |      |           |        |    |       |    |
|-------------|---------------|------|-----------|--------|----|-------|----|
| IPI00738765 | KIAA1949      | 23.8 | 6.87E-33  | -0.570 | 8  | 4.0   | Q1 |
| IPI00009542 | MAGED2        | 8.9  | 5.55E-08  | -0.567 | 3  | 8.2   | Q1 |
| IPI00003949 | UBE2N         | 52.6 | 6.92E-116 | -0.567 | 12 | 94.0  | Q1 |
| IPI00183786 | FADS2         | 15.3 | 6.10E-19  | -0.566 | 4  | 4.1   | Q1 |
| IPI00658152 | TNS3          | 13.6 | 6.47E-273 | -0.565 | 12 | 33.1  | Q1 |
| IPI00000877 | HYOU1         | 46.8 | <1.0E-304 | -0.565 | 44 | 84.9  | Q1 |
| IPI00003783 | MAP2K2        | 17.5 | 3.54E-19  | -0.565 | 5  | 24.1  | Q1 |
| IPI00749454 | RFTN1         | 9.2  | 2.85E-87  | -0.564 | 7  | 60.4  | Q1 |
| IPI00014197 | CDV3          | 28.7 | 2.40E-97  | -0.564 | 7  | 18.9  | Q1 |
| IPI00844264 | DKFZp779B0247 | 29.8 | 1.94E-196 | -0.561 | 21 | 12.6  | Q1 |
| IPI00398009 | IPO4          | 16.3 | 8.14E-118 | -0.560 | 9  | 17.4  | Q1 |
| IPI00430472 | ASCC3         | 6.3  | 1.27E-39  | -0.558 | 8  | 30.7  | Q1 |
| IPI00401264 | ERP44         | 24.4 | 4.88E-83  | -0.558 | 12 | 54.6  | Q1 |
| IPI00784114 | RASA3         | 5.5  | 9.06E-20  | -0.545 | 6  | 43.1  | Q1 |
| IPI00300371 | SF3B3         | 27.4 | <1.0E-304 | -0.545 | 31 | 20.4  | Q1 |
| IPI00884896 | TXNRD1        | 49.3 | <1.0E-304 | -0.543 | 22 | 13.9  | Q1 |
| IPI00742743 | TP53BP1       | 8.8  | 1.07E-132 | -0.542 | 6  | 31.1  | Q1 |
| IPI00787827 | PITRM1        | 21.8 | 4.91E-158 | -0.541 | 8  | 13.6  | Q1 |
| IPI00745433 | EIF2C2        | 3.7  | 5.93E-02  | -0.541 | 2  | 27.3  | Q1 |
| IPI00428967 | TIRAP3        | 13.6 | 2.32E-26  | -0.539 | 2  | 1.5   | Q1 |
| IPI00014399 | FHL3          | 15   | 4.00E-11  | -0.539 | 5  | 15.7  | Q1 |
| IPI00291946 | USP10         | 15.7 | 9.84E-79  | -0.539 | 6  | 16.7  | Q1 |
| IPI00183002 | PPP1R12A      | 24.7 | 1.74E-238 | -0.535 | 20 | 42.0  | Q1 |
| IPI00290461 | EIF3J         | 16.3 | 3.35E-32  | -0.534 | 4  | 5.9   | Q1 |
| IPI00910194 | NUP153        | 5    | 5.80E-18  | -0.528 | 3  | 23.3  | Q1 |
| IPI00005578 | EHD4          | 23.3 | 2.74E-187 | -0.526 | 5  | 7.5   | Q1 |
| IPI00748502 | CRTAP         | 26.7 | 7.76E-66  | -0.525 | 7  | 102.0 | Q1 |
| IPI00795611 | GIT1          | 5.1  | 2.65E-18  | -0.524 | 2  | 12.6  | Q1 |
| IPI00855820 | MON2          | 4.9  | 2.82E-25  | -0.521 | 5  | 117.7 | Q1 |
| IPI00019918 | DDX19A        | 19.7 | 3.66E-37  | -0.521 | 2  | 2.1   | Q1 |
| IPI00027627 | TNFAIP8       | 19   | 2.60E-20  | -0.519 | 2  | 25.2  | Q1 |
| IPI00397571 | NSFL1C        | 24.7 | 2.93E-54  | -0.515 | 4  | 4.0   | Q1 |
| IPI00374657 | VAPA          | 38.1 | 7.59E-103 | -0.512 | 8  | 80.2  | Q1 |

|             |          |      |           |        |    |       |    |
|-------------|----------|------|-----------|--------|----|-------|----|
| IPI00299254 | EIF5B    | 19.6 | 2.11E-226 | -0.511 | 14 | 22.8  | Q1 |
| IPI00027834 | HNRNPL   | 53.1 | <1.0E-304 | -0.510 | 23 | 40.4  | Q1 |
| IPI00023234 | UBA2     | 29.1 | 7.94E-116 | -0.510 | 10 | 5.7   | Q1 |
| IPI00015842 | RCN1     | 49.2 | 1.69E-249 | -0.508 | 10 | 7.0   | Q1 |
| IPI00644297 | SKI2W    | 15.4 | 1.34E-78  | -0.505 | 6  | 72.2  | Q1 |
| IPI00293303 | LGMN     | 7.2  | 5.03E-16  | -0.505 | 2  | 9.5   | Q1 |
| IPI00465132 | COPE     | 52.9 | <1.0E-304 | -0.504 | 9  | 69.8  | Q1 |
| IPI00413895 | GOLGA2   | 12.5 | 6.64E-72  | -0.504 | 4  | 91.5  | Q1 |
| IPI00328161 | FKBP8    | 8.8  | 6.33E-62  | -0.502 | 2  | 6.1   | Q1 |
| IPI00006482 | ATP1A1   | 35.2 | <1.0E-304 | -0.502 | 49 | 89.8  | Q1 |
| IPI00011592 | DYNC1L12 | 24   | 3.33E-260 | -0.501 | 7  | 12.8  | Q1 |
| IPI00871890 | PICALM   | 33.9 | <1.0E-304 | -0.497 | 14 | 104.8 | Q2 |
| IPI00292953 | RAI14    | 36.1 | 4.56E-225 | -0.496 | 27 | 54.9  | Q2 |
| IPI00009070 | HBS1L    | 15.9 | 8.83E-59  | -0.495 | 5  | 17.8  | Q2 |
| IPI00024097 | TES      | 17.6 | 6.72E-32  | -0.494 | 2  | 2.6   | Q2 |
| IPI00910513 | GSPT1    | 38   | 4.73E-80  | -0.494 | 16 | 11.3  | Q2 |
| IPI00215716 | EPB41L3  | 23.8 | 5.53E-268 | -0.493 | 13 | 12.0  | Q2 |
| IPI00306369 | NSUN2    | 13.7 | 3.34E-130 | -0.493 | 8  | 17.6  | Q2 |
| IPI00395488 | VASN     | 8.2  | 2.39E-151 | -0.491 | 2  | 139.7 | Q2 |
| IPI00400922 | PDCD11   | 3.6  | 2.21E-13  | -0.488 | 3  | 100.3 | Q2 |
| IPI00477971 | TBL3     | 6.7  | 1.19E-37  | -0.486 | 4  | 13.3  | Q2 |
| IPI00872597 | ZNF326   | 6    | 2.09E-13  | -0.480 | 2  | 11.1  | Q2 |
| IPI00031768 | HOOK3    | 14.6 | 2.18E-166 | -0.479 | 5  | 23.8  | Q2 |
| IPI00413324 | RPL17    | 37.5 | 1.06E-26  | -0.477 | 11 | 71.8  | Q2 |
| IPI00554788 | KRT18    | 37.4 | 1.89E-139 | -0.476 | 10 | 11.5  | Q2 |
| IPI00218466 | SEC61A1  | 25.3 | 1.37E-88  | -0.476 | 8  | 81.9  | Q2 |
| IPI00020164 | PTP4A1   | 21.4 | 1.16E-29  | -0.476 | 2  | 12.2  | Q2 |
| IPI00235412 | DNM1L    | 40   | <1.0E-304 | -0.473 | 20 | 17.2  | Q2 |
| IPI00017160 | VTA1     | 23.1 | 5.34E-16  | -0.469 | 2  | 6.5   | Q2 |
| IPI00021924 | H1FX     | 26.3 | 6.68E-89  | -0.467 | 3  | 14.7  | Q2 |
| IPI00845271 | EHBP1    | 7.5  | 2.28E-27  | -0.463 | 5  | 17.3  | Q2 |
| IPI00299084 | TMEM33   | 19   | 8.93E-25  | -0.460 | 3  | 14.7  | Q2 |
| IPI00296922 | LAMB2    | 17.3 | 8.33E-237 | -0.458 | 16 | 21.5  | Q2 |

|             |          |      |           |        |     |       |    |
|-------------|----------|------|-----------|--------|-----|-------|----|
| IPI00794221 | DBN1     | 25.3 | 1.99E-293 | -0.456 | 23  | 25.7  | Q2 |
| IPI00015195 | CSTF3    | 11.3 | 9.45E-150 | -0.456 | 6   | 32.0  | Q2 |
| IPI00219005 | FKBP4    | 26.8 | 5.92E-87  | -0.454 | 8   | 16.2  | Q2 |
| IPI00169325 | WDR36    | 2.2  | 6.93E-04  | -0.452 | 2   | 5.1   | Q2 |
| IPI00514301 | CASK     | 3.2  | 6.51E-08  | -0.451 | 4   | 11.5  | Q2 |
| IPI00221012 | USP9X    | 13.2 | 7.90E-145 | -0.451 | 24  | 38.2  | Q2 |
| IPI00296830 | LUZP1    | 7.9  | 1.36E-51  | -0.448 | 6   | 15.5  | Q2 |
| IPI00329573 | COL12A1  | 34.7 | <1.0E-304 | -0.447 | 158 | 118.9 | Q2 |
| IPI00382843 | PRNP     | 7    | 1.46E-15  | -0.441 | 2   | 23.8  | Q2 |
| IPI00746318 | SGCD     | 12.1 | 3.25E-42  | -0.439 | 3   | 7.7   | Q2 |
| IPI00015902 | PDGFRB   | 18.9 | 2.54E-232 | -0.437 | 19  | 64.7  | Q2 |
| IPI00024129 | PPIC     | 20.8 | 4.68E-31  | -0.436 | 7   | 17.9  | Q2 |
| IPI00293350 | TSNAX    | 23.1 | 7.58E-96  | -0.436 | 2   | 6.0   | Q2 |
| IPI00026219 | CPSF1    | 5.4  | 3.92E-32  | -0.434 | 5   | 37.5  | Q2 |
| IPI00328911 | HECTD1   | 2    | 3.71E-07  | -0.429 | 3   | 16.8  | Q2 |
| IPI00016702 | RABGAP1  | 8.3  | 2.00E-39  | -0.428 | 9   | 48.9  | Q2 |
| IPI00513791 | DOCK7    | 13.5 | 1.39E-102 | -0.424 | 13  | 17.0  | Q2 |
| IPI00250297 | AASDHPPT | 10   | 1.97E-39  | -0.422 | 2   | 8.5   | Q2 |
| IPI00871680 | ARFGAP2  | 14   | 1.55E-136 | -0.419 | 5   | 28.1  | Q2 |
| IPI00001159 | GCN1L1   | 42.4 | <1.0E-304 | -0.418 | 98  | 68.4  | Q2 |
| IPI00334587 | HNRNPAB  | 25   | 1.74E-146 | -0.417 | 7   | 81.9  | Q2 |
| IPI00387077 | SLC12A9  | 4.5  | 9.34E-11  | -0.417 | 2   | 33.6  | Q2 |
| IPI00011461 | STRN3    | 7.3  | 5.16E-24  | -0.414 | 4   | 13.7  | Q2 |
| IPI00011609 | UBE3A    | 3.7  | 9.86E-08  | -0.411 | 2   | 13.7  | Q2 |
| IPI00166044 | RPTOR    | 3.7  | 2.60E-12  | -0.411 | 3   | 29.2  | Q2 |
| IPI00465160 | ABCF3    | 11.4 | 1.33E-31  | -0.410 | 3   | 11.8  | Q2 |
| IPI00217465 | HIST1H1C | 27.7 | 9.11E-73  | -0.407 | 13  | 92.8  | Q2 |
| IPI00294495 | UFC1     | 19.8 | 1.89E-04  | -0.407 | 2   | 17.8  | Q2 |
| IPI00018349 | MCM4     | 19   | 4.11E-99  | -0.405 | 4   | 15.4  | Q2 |
| IPI00448798 | CSNK1A1  | 11.8 | 7.49E-21  | -0.403 | 2   | 8.5   | Q2 |
| IPI00291238 | FBLIM1   | 22.3 | 6.70E-51  | -0.401 | 3   | 5.2   | Q2 |
| IPI00304187 | RBM28    | 8    | 4.42E-14  | -0.400 | 4   | 20.5  | Q2 |
| IPI00220194 | SLC2A1   | 4.9  | 4.61E-18  | -0.399 | 9   | 30.2  | Q2 |

|             |          |      |           |        |    |      |    |
|-------------|----------|------|-----------|--------|----|------|----|
| IPI00455473 | MIA3     | 5.6  | 3.30E-69  | -0.399 | 6  | 87.4 | Q2 |
| IPI00217468 | HIST1H1B | 22.1 | 2.79E-72  | -0.399 | 12 | 57.5 | Q2 |
| IPI00385449 | PRKCA    | 19.3 | 1.21E-133 | -0.394 | 6  | 20.6 | Q2 |
| IPI00031554 | DDX50    | 4.3  | 4.14E-15  | -0.392 | 2  | 38.6 | Q2 |
| IPI00031836 | DRG1     | 19.9 | 5.00E-75  | -0.391 | 6  | 13.1 | Q2 |
| IPI00296907 | ACOX1    | 8.8  | 3.56E-48  | -0.391 | 3  | 24.8 | Q2 |
| IPI00232533 | EIF1AX   | 34   | 8.97E-17  | -0.389 | 5  | 8.7  | Q2 |
| IPI00793201 | AIMP1    | 29.5 | 4.82E-92  | -0.388 | 4  | 7.1  | Q2 |
| IPI00026089 | SF3B1    | 36   | <1.0E-304 | -0.386 | 29 | 38.9 | Q2 |
| IPI00299033 | KPNA3    | 8.1  | 2.44E-49  | -0.385 | 2  | 26.5 | Q2 |
| IPI00012512 | RRAS2    | 15.2 | 6.07E-120 | -0.385 | 2  | 20.1 | Q2 |
| IPI00643166 | PGM3     | 33.3 | 6.38E-166 | -0.383 | 13 | 11.1 | Q2 |
| IPI00647635 | GIGYF2   | 9.8  | 6.63E-56  | -0.381 | 3  | 3.6  | Q2 |
| IPI00291608 | PCNP     | 11.2 | 1.02E-10  | -0.376 | 2  | 1.9  | Q2 |
| IPI00293735 | IKBKAP   | 4.4  | 5.14E-28  | -0.375 | 4  | 29.3 | Q2 |
| IPI00744319 | PRRC1    | 6.7  | 5.11E-35  | -0.374 | 4  | 12.4 | Q2 |
| IPI00216138 | TAGLN    | 87.1 | <1.0E-304 | -0.374 | 78 | 15.7 | Q2 |
| IPI00005194 | UBFD1    | 4.3  | 6.37E-03  | -0.372 | 2  | 3.6  | Q2 |
| IPI00003768 | PES1     | 8.2  | 6.69E-18  | -0.371 | 2  | 1.4  | Q2 |
| IPI00032827 | SF3B14   | 32   | 3.13E-55  | -0.369 | 2  | 33.4 | Q2 |
| IPI00012202 | WDR77    | 6.4  | 3.84E-52  | -0.369 | 2  | 3.4  | Q2 |
| IPI00015953 | DDX21    | 12.1 | 4.22E-34  | -0.368 | 6  | 5.8  | Q2 |
| IPI00101037 | RCN3     | 43.9 | 6.73E-200 | -0.367 | 12 | 9.0  | Q2 |
| IPI00434580 | MYOM1    | 0.6  | 1.08E-02  | -0.364 | 2  | 19.7 | Q2 |
| IPI00003479 | MAPK1    | 52.2 | 1.67E-176 | -0.364 | 13 | 27.0 | Q2 |
| IPI00029557 | GRPEL1   | 14.3 | 2.21E-25  | -0.364 | 2  | 5.9  | Q2 |
| IPI00009946 | TOMM34   | 18.8 | 6.18E-17  | -0.364 | 2  | 20.3 | Q2 |
| IPI00018352 | UCHL1    | 53.8 | 4.30E-202 | -0.361 | 13 | 19.8 | Q2 |
| IPI00011268 | RALY     | 31.3 | 8.29E-52  | -0.359 | 7  | 16.1 | Q2 |
| IPI00000861 | LASP1    | 44.4 | 1.72E-110 | -0.358 | 18 | 79.2 | Q2 |
| IPI00411937 | NOP56    | 27.1 | 4.44E-226 | -0.357 | 16 | 13.0 | Q2 |
| IPI00021466 | PAIP1    | 4.8  | 2.27E-14  | -0.356 | 2  | 7.4  | Q2 |
| IPI00910882 | TBC1D5   | 8    | 1.32E-09  | -0.354 | 6  | 22.0 | Q2 |

|             |        |      |           |        |    |       |    |
|-------------|--------|------|-----------|--------|----|-------|----|
| IPI00337397 | NUP98  | 8.7  | 4.80E-78  | -0.353 | 11 | 10.4  | Q2 |
| IPI00890837 | SMCHD1 | 4.6  | 1.21E-24  | -0.352 | 6  | 72.8  | Q2 |
| IPI00220158 | ADD1   | 28.3 | 4.90E-174 | -0.350 | 14 | 19.7  | Q2 |
| IPI00911038 | MYH9   | 8.9  | 1.57E-54  | -0.349 | 5  | 23.8  | Q2 |
| IPI00477040 | NUP188 | 5.5  | 2.16E-17  | -0.348 | 3  | 86.4  | Q2 |
| IPI00306960 | NARS   | 47.3 | <1.0E-304 | -0.348 | 30 | 78.2  | Q2 |
| IPI00908949 | TARS   | 49.6 | <1.0E-304 | -0.347 | 42 | 25.5  | Q2 |
| IPI00442073 | CSRP1  | 46.6 | 2.38E-127 | -0.347 | 10 | 22.9  | Q2 |
| IPI00163381 | LEPRE1 | 25.8 | 1.07E-164 | -0.347 | 22 | 70.2  | Q2 |
| IPI00300127 | NAT10  | 10   | 8.78E-38  | -0.346 | 6  | 12.9  | Q2 |
| IPI00103994 | LARS   | 40.1 | <1.0E-304 | -0.346 | 35 | 38.4  | Q2 |
| IPI00013183 | UBA7   | 10.1 | 2.08E-64  | -0.346 | 3  | 8.1   | Q2 |
| IPI00005154 | SSRP1  | 30.3 | 1.15E-246 | -0.345 | 19 | 11.0  | Q2 |
| IPI00465294 | CDC5L  | 22.4 | 3.39E-98  | -0.344 | 9  | 43.0  | Q2 |
| IPI00013297 | PDAP1  | 37.6 | 3.83E-129 | -0.344 | 8  | 16.1  | Q2 |
| IPI00789551 | MATR3  | 32.8 | <1.0E-304 | -0.344 | 29 | 55.1  | Q2 |
| IPI00000728 | USP15  | 10.2 | 7.70E-25  | -0.342 | 6  | 22.1  | Q2 |
| IPI00032003 | EMD    | 46.1 | 6.62E-250 | -0.342 | 9  | 26.4  | Q2 |
| IPI00019642 | CLIP2  | 6    | 2.24E-44  | -0.339 | 2  | 3.8   | Q2 |
| IPI00152990 | ATG2B  | 0.8  | 1.00E-03  | -0.336 | 2  | 44.5  | Q2 |
| IPI00154451 | MMS19  | 14.3 | 5.03E-78  | -0.336 | 8  | 72.6  | Q2 |
| IPI00550746 | NUDC   | 31.1 | 3.45E-65  | -0.335 | 7  | 11.5  | Q2 |
| IPI00011603 | PSMD3  | 40.4 | 2.19E-253 | -0.335 | 23 | 28.2  | Q2 |
| IPI00027192 | PLOD1  | 45.3 | <1.0E-304 | -0.333 | 35 | 21.2  | Q2 |
| IPI00009771 | LMNB2  | 51.1 | <1.0E-304 | -0.332 | 31 | 32.4  | Q2 |
| IPI00760715 | CAST   | 44.8 | <1.0E-304 | -0.332 | 13 | 7.4   | Q2 |
| IPI00301561 | TRIP6  | 9.7  | 2.63E-13  | -0.332 | 2  | 19.0  | Q2 |
| IPI00009235 | SSR3   | 7.1  | 1.31E-18  | -0.331 | 2  | 1.2   | Q2 |
| IPI00873137 | COL1A2 | 36.9 | <1.0E-304 | -0.331 | 71 | 243.1 | Q2 |
| IPI00100656 | GPSN2  | 24.4 | 1.03E-22  | -0.331 | 6  | 11.6  | Q2 |
| IPI00902843 | CDIPT  | 15.6 | 6.32E-26  | -0.331 | 2  | 5.0   | Q2 |
| IPI00761017 | TGFB11 | 24.7 | 1.71E-203 | -0.330 | 8  | 17.5  | Q2 |
| IPI00001738 | NUP88  | 10   | 1.15E-14  | -0.329 | 2  | 33.4  | Q2 |

|             |          |      |           |        |    |       |    |
|-------------|----------|------|-----------|--------|----|-------|----|
| IPI00008711 | WFS1     | 6.7  | 8.72E-10  | -0.327 | 7  | 14.2  | Q2 |
| IPI00002478 | ECE1     | 20.3 | 1.06E-110 | -0.326 | 5  | 21.4  | Q2 |
| IPI00033130 | SAE1     | 29.8 | 4.42E-104 | -0.326 | 4  | 15.1  | Q2 |
| IPI00396218 | SCYL2    | 2.4  | 8.99E-08  | -0.325 | 2  | 7.8   | Q2 |
| IPI00290566 | CCT1     | 68.2 | <1.0E-304 | -0.325 | 40 | 86.3  | Q2 |
| IPI00175096 | TTC9C    | 12.3 | 2.43E-09  | -0.324 | 3  | 5.3   | Q2 |
| IPI00032491 | LEMD3    | 6    | 8.52E-24  | -0.323 | 4  | 123.8 | Q2 |
| IPI00166079 | VKORC1L1 | 15.9 | 1.96E-06  | -0.322 | 2  | 9.1   | Q2 |
| IPI00885108 | PATL1    | 5.1  | 5.88E-19  | -0.320 | 4  | 13.5  | Q2 |
| IPI00257508 | DPYSL2   | 73.6 | <1.0E-304 | -0.317 | 58 | 50.9  | Q2 |
| IPI00554521 | FTH1     | 44.3 | 3.51E-51  | -0.316 | 14 | 58.7  | Q2 |
| IPI00013212 | CSK      | 13.3 | 5.00E-31  | -0.315 | 4  | 22.4  | Q2 |
| IPI00028387 | DDRKG1   | 20.1 | 5.95E-105 | -0.315 | 4  | 21.2  | Q2 |
| IPI00020418 | RRAS     | 44.5 | 1.50E-183 | -0.315 | 9  | 15.6  | Q2 |
| IPI00883896 | LIMA1    | 37.6 | <1.0E-304 | -0.314 | 23 | 20.3  | Q2 |
| IPI00299904 | MCM7     | 24.8 | 2.62E-148 | -0.312 | 12 | 16.6  | Q2 |
| IPI00022254 | ATG3     | 24.2 | 1.34E-54  | -0.312 | 6  | 63.5  | Q2 |
| IPI00011876 | MTAP     | 41   | 1.86E-187 | -0.312 | 8  | 22.6  | Q2 |
| IPI00034319 | CUTA     | 27.8 | 1.19E-42  | -0.311 | 2  | 5.2   | Q2 |
| IPI00329598 | HSD17B11 | 30.7 | 4.57E-108 | -0.311 | 3  | 17.2  | Q2 |
| IPI00026519 | PPIF     | 30   | 1.08E-114 | -0.309 | 3  | 48.2  | Q2 |
| IPI00009123 | NUCB2    | 15   | 1.56E-34  | -0.308 | 3  | 2.3   | Q2 |
| IPI00221035 | BTF3     | 59.2 | 3.70E-114 | -0.307 | 7  | 34.2  | Q2 |
| IPI00014938 | SARNP    | 32.4 | 5.29E-89  | -0.306 | 4  | 26.7  | Q2 |
| IPI00024976 | TOMM22   | 48.6 | 1.44E-86  | -0.306 | 2  | 10.9  | Q2 |
| IPI00032206 | PDLIM4   | 17.9 | 1.30E-11  | -0.304 | 4  | 4.2   | Q2 |
| IPI00014264 | ACAP2    | 11.4 | 7.76E-80  | -0.304 | 9  | 18.4  | Q2 |
| IPI00024971 | OSBP     | 17.6 | 5.32E-80  | -0.303 | 10 | 14.3  | Q2 |
| IPI00033022 | DNM2     | 35.7 | 3.99E-182 | -0.302 | 22 | 45.3  | Q2 |
| IPI00828150 | SUGT1    | 33.7 | 1.31E-152 | -0.302 | 5  | 10.8  | Q2 |
| IPI00001710 | FFR      | 10.6 | 8.90E-16  | -0.301 | 6  | 18.4  | Q2 |
| IPI00019380 | NCBP1    | 6.6  | 7.88E-21  | -0.300 | 4  | 16.0  | Q2 |
| IPI00398798 | H2AFV    | 57.8 | 1.42E-25  | -0.299 | 2  | 15.9  | Q2 |

|             |          |      |           |        |    |       |    |
|-------------|----------|------|-----------|--------|----|-------|----|
| IPI00395887 | TMX1     | 19.3 | 6.42E-46  | -0.298 | 5  | 50.2  | Q2 |
| IPI00293126 | TBCB     | 45.9 | 1.85E-115 | -0.296 | 6  | 5.0   | Q2 |
| IPI00376119 | PRKACB   | 3    | 6.20E-59  | -0.295 | 2  | 14.1  | Q2 |
| IPI00332371 | PFKL     | 32.2 | <1.0E-304 | -0.294 | 23 | 41.9  | Q2 |
| IPI00747533 | PGD      | 49   | <1.0E-304 | -0.294 | 27 | 16.0  | Q2 |
| IPI00218922 | SEC63    | 16.3 | 1.54E-54  | -0.293 | 6  | 11.1  | Q2 |
| IPI00295772 | CYP51A1  | 23.4 | 1.19E-133 | -0.292 | 5  | 4.7   | Q2 |
| IPI00008529 | RPLP2    | 77.4 | <1.0E-304 | -0.292 | 7  | 16.5  | Q2 |
| IPI00029737 | ACSL4    | 15.8 | 4.07E-170 | -0.291 | 7  | 18.9  | Q2 |
| IPI00929344 | PFAS     | 14.3 | 9.78E-230 | -0.290 | 7  | 18.5  | Q2 |
| IPI00012340 | SFRS9    | 22.6 | 9.15E-19  | -0.290 | 3  | 1.0   | Q2 |
| IPI00021458 | EHD3     | 11.5 | 1.23E-127 | -0.289 | 5  | 15.8  | Q2 |
| IPI00419979 | PAK2     | 26.7 | 4.48E-82  | -0.288 | 6  | 14.8  | Q2 |
| IPI00014852 | PGM5     | 16.2 | 1.67E-88  | -0.287 | 4  | 23.3  | Q2 |
| IPI00045550 | PPP1R9B  | 4.7  | 1.52E-21  | -0.287 | 2  | 24.7  | Q2 |
| IPI00856116 | PALLD    | 24.4 | <1.0E-304 | -0.287 | 28 | 31.6  | Q2 |
| IPI00219774 | PRKAR2A  | 39.9 | 3.27E-85  | -0.286 | 7  | 3.7   | Q2 |
| IPI00914048 | C11orf68 | 17.7 | 1.69E-09  | -0.285 | 6  | 13.0  | Q2 |
| IPI00019812 | PPP5C    | 7.4  | 7.02E-28  | -0.285 | 2  | 26.6  | Q2 |
| IPI00008991 | DR1      | 11.9 | 2.13E-07  | -0.284 | 2  | 0.6   | Q2 |
| IPI00465045 | DIP2B    | 4.3  | 4.18E-24  | -0.284 | 3  | 22.8  | Q2 |
| IPI00021290 | ACLY     | 53.6 | <1.0E-304 | -0.283 | 88 | 100.3 | Q2 |
| IPI00014589 | CLTB     | 25.3 | 5.39E-08  | -0.283 | 8  | 14.2  | Q2 |
| IPI00008524 | PABPC1   | 37.9 | <1.0E-304 | -0.283 | 33 | 98.9  | Q2 |
| IPI00299719 | TCIRG1   | 15.9 | 3.59E-40  | -0.281 | 14 | 31.5  | Q2 |
| IPI00790739 | ACO2     | 44.1 | <1.0E-304 | -0.281 | 20 | 9.2   | Q2 |
| IPI00102069 | EIF3M    | 31   | 1.16E-144 | -0.281 | 7  | 8.0   | Q2 |
| IPI00456887 | HNRNPUL2 | 34.7 | <1.0E-304 | -0.280 | 26 | 70.0  | Q2 |
| IPI00025849 | ANP32A   | 10.8 | 4.05E-96  | -0.280 | 2  | 6.4   | Q2 |
| IPI00031397 | ACSL3    | 32.8 | 3.66E-284 | -0.279 | 13 | 18.1  | Q2 |
| IPI00017596 | MAPRE1   | 44.4 | 1.29E-210 | -0.279 | 8  | 8.5   | Q2 |
| IPI00291510 | IMPDH2   | 27.2 | 1.89E-253 | -0.278 | 10 | 7.9   | Q2 |
| IPI00045051 | PURB     | 19.6 | 1.55E-35  | -0.278 | 3  | 12.1  | Q2 |

|             |               |      |           |        |    |       |    |
|-------------|---------------|------|-----------|--------|----|-------|----|
| IPI00550917 | TWF2          | 45.8 | 1.84E-204 | -0.278 | 9  | 9.0   | Q2 |
| IPI00296165 | C1R           | 8.5  | 4.47E-12  | -0.278 | 4  | 17.4  | Q2 |
| IPI00550032 | RP11          | 39.7 | 3.66E-94  | -0.278 | 10 | 71.7  | Q2 |
| IPI00007334 | ACIN1         | 0.5  | 7.20E-34  | -0.277 | 2  | 33.2  | Q2 |
| IPI00007927 | SMC2          | 8.4  | 5.55E-35  | -0.277 | 2  | 16.2  | Q2 |
| IPI00218993 | HSPH1         | 39.8 | <1.0E-304 | -0.277 | 24 | 48.0  | Q2 |
| IPI00015891 | PFDN4         | 9    | 2.67E-19  | -0.276 | 2  | 14.5  | Q2 |
| IPI00000494 | RPL5          | 43.1 | 1.80E-191 | -0.273 | 19 | 110.9 | Q2 |
| IPI00013485 | RPS2          | 46.1 | 2.94E-114 | -0.272 | 17 | 20.1  | Q2 |
| IPI00550021 | RPL3          | 39.7 | 5.60E-144 | -0.272 | 21 | 92.4  | Q2 |
| IPI00017342 | RHOG          | 45   | 7.37E-201 | -0.272 | 6  | 10.2  | Q2 |
| IPI00024157 | FKBP3         | 38.4 | 2.43E-68  | -0.271 | 6  | 31.6  | Q2 |
| IPI00103940 | MFSD10        | 6.6  | 8.50E-22  | -0.270 | 3  | 10.7  | Q2 |
| IPI00294879 | RANGAP1       | 41.1 | 6.46E-243 | -0.270 | 14 | 9.5   | Q2 |
| IPI00642798 | SC65          | 15.7 | 2.37E-74  | -0.270 | 4  | 14.2  | Q2 |
| IPI00004358 | PYGB          | 49   | <1.0E-304 | -0.270 | 47 | 61.3  | Q2 |
| IPI00102752 | RBM15         | 6.3  | 8.70E-09  | -0.270 | 2  | 24.1  | Q2 |
| IPI00377261 | FUBP3         | 20.1 | 1.08E-69  | -0.268 | 6  | 5.6   | Q2 |
| IPI00021266 | RPL23A        | 52.6 | 1.56E-55  | -0.267 | 15 | 17.7  | Q2 |
| IPI00000230 | DKFZp586K2222 | 48.9 | 3.25E-272 | -0.267 | 16 | 16.1  | Q2 |
| IPI00029444 | C12orf10      | 14.4 | 5.32E-60  | -0.267 | 4  | 112.8 | Q2 |
| IPI00292020 | SRM           | 35.4 | 8.68E-111 | -0.267 | 7  | 7.8   | Q2 |
| IPI00300805 | LRSAM1        | 10.9 | 1.75E-76  | -0.266 | 4  | 30.8  | Q2 |
| IPI00291695 | GPX8          | 52.6 | 6.69E-86  | -0.266 | 8  | 40.8  | Q2 |
| IPI00018415 | TM9SF2        | 3.5  | 1.18E-05  | -0.266 | 3  | 11.7  | Q2 |
| IPI00182126 | FKBP9         | 32.8 | 3.02E-169 | -0.265 | 16 | 11.4  | Q2 |
| IPI00216047 | SMARCC2       | 8.2  | 8.20E-114 | -0.265 | 6  | 16.1  | Q2 |
| IPI00301579 | NPC2          | 33.3 | 3.20E-66  | -0.264 | 4  | 16.2  | Q2 |
| IPI00009274 | COPZ2         | 18.6 | 2.23E-96  | -0.264 | 2  | 24.5  | Q2 |
| IPI00793155 | RAB34         | 21.2 | 3.87E-31  | -0.264 | 2  | 2.5   | Q2 |
| IPI00032851 | COPZ1         | 35   | 2.27E-111 | -0.263 | 4  | 8.7   | Q2 |
| IPI00001883 | SNX9          | 32.8 | 5.34E-241 | -0.262 | 10 | 7.9   | Q2 |
| IPI00013877 | HNRNPH3       | 19.7 | 5.24E-129 | -0.262 | 6  | 4.4   | Q2 |



|             |               |      |           |        |     |       |    |
|-------------|---------------|------|-----------|--------|-----|-------|----|
| IPI00019463 | EIF2AK2       | 19.6 | 1.48E-117 | -0.262 | 6   | 8.4   | Q2 |
| IPI00024705 | GIPC1         | 24.3 | 3.12E-53  | -0.261 | 2   | 44.8  | Q2 |
| IPI00217519 | RALA          | 14.1 | 1.42E-84  | -0.260 | 3   | 15.7  | Q2 |
| IPI00104050 | THRAP3        | 24.3 | 6.18E-105 | -0.259 | 14  | 15.0  | Q2 |
| IPI00796337 | PCBP2         | 21.6 | 6.36E-166 | -0.259 | 13  | 89.1  | Q2 |
| IPI00027223 | IDH1          | 42   | 1.66E-193 | -0.258 | 32  | 103.6 | Q2 |
| IPI00025156 | STUB1         | 7.3  | 3.37E-05  | -0.257 | 2   | 2.1   | Q2 |
| IPI00009236 | CAV1          | 50   | 6.46E-153 | -0.256 | 15  | 34.9  | Q2 |
| IPI00060181 | EFHD2         | 24.2 | 3.25E-35  | -0.254 | 5   | 11.4  | Q2 |
| IPI00827535 | PTMA          | 35.1 | 7.25E-158 | -0.253 | 5   | 19.0  | Q2 |
| IPI00795922 | MRPS28        | 9.9  | 1.29E-05  | -0.253 | 2   | 42.5  | Q2 |
| IPI00102815 | NOC3L         | 4.9  | 6.40E-22  | -0.253 | 2   | 28.0  | Q2 |
| IPI00294472 | TMED5         | 9.6  | 2.22E-43  | -0.253 | 2   | 29.2  | Q2 |
| IPI00023647 | UBA6          | 26.5 | 3.36E-234 | -0.253 | 22  | 24.4  | Q2 |
| IPI00021167 | PRKRA         | 29.7 | 2.06E-108 | -0.252 | 2   | 3.2   | Q2 |
| IPI00165949 | ERAP1         | 18.6 | 2.92E-112 | -0.252 | 11  | 8.1   | Q2 |
| IPI00902614 | USP24         | 2.6  | 9.81E-17  | -0.252 | 4   | 41.2  | Q2 |
| IPI00433279 | SLFN5         | 18   | 1.58E-97  | -0.252 | 15  | 26.2  | Q2 |
| IPI00185919 | LARP1         | 18.9 | 1.11E-98  | -0.251 | 12  | 11.3  | Q2 |
| IPI00024143 | AAAS          | 4    | 8.60E-03  | -0.251 | 2   | 17.4  | Q2 |
| IPI00023542 | TMED9         | 32.8 | 1.57E-85  | -0.251 | 5   | 19.2  | Q2 |
| IPI00828080 | ARAP1         | 3.7  | 1.07E-23  | -0.250 | 2   | 47.1  | Q2 |
| IPI00181728 | BXDC2         | 9.1  | 4.40E-16  | -0.250 | 3   | 7.4   | Q2 |
| IPI00056334 | PRKCDBP       | 50.2 | 7.35E-130 | -0.248 | 16  | 71.0  | Q2 |
| IPI00011898 | EIF2B5        | 9.3  | 4.53E-22  | -0.247 | 5   | 12.9  | Q2 |
| IPI00307162 | VCL           | 68.3 | <1.0E-304 | -0.247 | 211 | 100.8 | Q2 |
| IPI00854642 | PDS5A         | 3.2  | 2.69E-29  | -0.246 | 2   | 9.8   | Q2 |
| IPI00001871 | PAWR          | 13.8 | 1.75E-44  | -0.246 | 4   | 30.2  | Q2 |
| IPI00011996 | UBE2Z         | 4.8  | 4.35E-02  | -0.246 | 2   | 1.3   | Q2 |
| IPI00300659 | CDC73         | 7.2  | 9.12E-10  | -0.245 | 2   | 0.0   | Q2 |
| IPI00008527 | RPLP1         | 74.6 | 4.38E-102 | -0.245 | 3   | 6.7   | Q2 |
| IPI00014263 | EIF4H         | 53.6 | 4.41E-235 | -0.244 | 9   | 10.2  | Q2 |
| IPI00815732 | DKFZp781N1372 | 33.3 | 5.96E-156 | -0.243 | 11  | 4.3   | Q2 |

|             |          |      |           |        |    |       |    |
|-------------|----------|------|-----------|--------|----|-------|----|
| IPI00011201 | ME2      | 15.9 | 8.93E-156 | -0.243 | 5  | 14.6  | Q2 |
| IPI00007765 | HSPA9    | 52.6 | <1.0E-304 | -0.240 | 39 | 67.4  | Q2 |
| IPI00432363 | MACF1    | 6.2  | <1.0E-304 | -0.239 | 16 | 47.7  | Q2 |
| IPI00792352 | RAN      | 46.2 | 6.26E-214 | -0.239 | 23 | 126.8 | Q2 |
| IPI00290204 | SNRNP70  | 23.6 | 1.17E-35  | -0.238 | 10 | 21.8  | Q2 |
| IPI00871693 | VAMP3    | 53   | 9.92E-134 | -0.238 | 2  | 9.5   | Q2 |
| IPI00296909 | PARP4    | 19.3 | 7.42E-189 | -0.238 | 17 | 95.2  | Q2 |
| IPI00170935 | LRRC47   | 29   | 3.48E-165 | -0.237 | 9  | 14.4  | Q2 |
| IPI00054042 | GTF2I    | 10.4 | 1.42E-40  | -0.234 | 7  | 26.9  | Q2 |
| IPI00179438 | DAB2     | 26.6 | 1.22E-117 | -0.234 | 19 | 68.5  | Q2 |
| IPI00009896 | EPHX1    | 28.6 | 5.26E-56  | -0.233 | 11 | 9.9   | Q2 |
| IPI00032140 | SERPINH1 | 59.8 | <1.0E-304 | -0.233 | 90 | 57.7  | Q2 |
| IPI00014312 | CUL3     | 24.2 | 2.19E-118 | -0.233 | 13 | 15.6  | Q2 |
| IPI00784013 | JAK1     | 5.1  | 2.75E-18  | -0.230 | 4  | 22.7  | Q2 |
| IPI00303300 | FKBP10   | 37.1 | <1.0E-304 | -0.229 | 44 | 50.6  | Q2 |
| IPI00554541 | ILVBL    | 18.4 | 4.19E-154 | -0.229 | 3  | 44.7  | Q2 |
| IPI00009790 | PFKP     | 45.7 | <1.0E-304 | -0.228 | 39 | 9.4   | Q2 |
| IPI00004962 | GOLIM4   | 13.1 | 3.84E-53  | -0.227 | 3  | 20.3  | Q2 |
| IPI00293009 | RABEP1   | 4.8  | 1.26E-42  | -0.227 | 2  | 3.2   | Q2 |
| IPI00549189 | THOP1    | 20.2 | 1.96E-101 | -0.227 | 10 | 14.7  | Q2 |
| IPI00219861 | ACP1     | 27.2 | 9.01E-34  | -0.226 | 2  | 3.8   | Q2 |
| IPI00418262 | ALDOC    | 20   | <1.0E-304 | -0.225 | 7  | 8.2   | Q2 |
| IPI00027280 | TOP2B    | 15.1 | 9.05E-180 | -0.225 | 13 | 26.6  | Q2 |
| IPI00292134 | EPS15    | 7.6  | 1.02E-39  | -0.224 | 4  | 13.3  | Q2 |
| IPI00419249 | PSMA3    | 47.5 | 3.25E-103 | -0.224 | 10 | 16.4  | Q2 |
| IPI00328748 | ARMET    | 38.9 | 5.24E-85  | -0.223 | 11 | 25.5  | Q2 |
| IPI00009885 | FKBP11   | 23.4 | 1.09E-69  | -0.222 | 4  | 21.8  | Q2 |
| IPI00874235 | ERGIC1   | 22.4 | 2.44E-36  | -0.221 | 5  | 24.3  | Q2 |
| IPI00002372 | ABCD3    | 15.3 | 7.57E-53  | -0.221 | 3  | 12.8  | Q2 |
| IPI00792422 | FAM21A   | 18.5 | <1.0E-304 | -0.221 | 7  | 12.6  | Q2 |
| IPI00102685 | MYADM    | 12.1 | 3.34E-61  | -0.221 | 7  | 57.4  | Q2 |
| IPI00003965 | USP7     | 8.6  | 4.18E-20  | -0.218 | 6  | 9.4   | Q2 |
| IPI00549725 | PGAM1    | 78   | <1.0E-304 | -0.218 | 14 | 7.8   | Q2 |

|             |          |      |           |        |    |       |    |
|-------------|----------|------|-----------|--------|----|-------|----|
| IPI00333771 | CALD1    | 67.5 | <1.0E-304 | -0.217 | 72 | 34.1  | Q2 |
| IPI00007909 | RABAC1   | 23.2 | 1.41E-10  | -0.217 | 2  | 0.6   | Q2 |
| IPI00465028 | TPI1     | 74.1 | <1.0E-304 | -0.215 | 32 | 21.9  | Q2 |
| IPI00009111 | TPBG     | 18.6 | 7.75E-105 | -0.215 | 6  | 6.3   | Q2 |
| IPI00032179 | SERPINC1 | 19.6 | 2.77E-34  | -0.214 | 11 | 196.7 | Q2 |
| IPI00009464 | EXOSC10  | 2.6  | 1.37E-13  | -0.213 | 2  | 48.5  | Q2 |
| IPI00218493 | HPRT1    | 57.8 | 1.31E-170 | -0.213 | 8  | 16.4  | Q2 |
| IPI00163849 | EPS15L1  | 8.6  | 1.74E-13  | -0.212 | 6  | 37.2  | Q2 |
| IPI00295487 | KIF13A   | 2    | 4.33E-05  | -0.212 | 2  | 59.3  | Q2 |
| IPI00046057 | STXBP1   | 7.3  | 1.34E-23  | -0.211 | 2  | 17.9  | Q2 |
| IPI00012772 | RPL8     | 26.8 | 8.13E-50  | -0.211 | 9  | 7.8   | Q2 |
| IPI00395627 | CACYBP   | 57   | 3.59E-56  | -0.210 | 4  | 29.7  | Q2 |
| IPI00301609 | NEK9     | 17.1 | 5.68E-74  | -0.209 | 12 | 51.1  | Q2 |
| IPI00477313 | HNRNPC   | 38.2 | 1.89E-147 | -0.208 | 27 | 70.7  | Q2 |
| IPI00414717 | GLG1     | 21.4 | 1.78E-104 | -0.207 | 15 | 37.3  | Q2 |
| IPI00020567 | ARHGAP1  | 62.9 | <1.0E-304 | -0.206 | 19 | 85.8  | Q2 |
| IPI00016932 | INPPL1   | 4.3  | 1.60E-15  | -0.206 | 5  | 16.9  | Q2 |
| IPI00022648 | EIF5     | 27.8 | 1.83E-86  | -0.205 | 6  | 6.7   | Q2 |
| IPI00010720 | CCT5     | 64.1 | <1.0E-304 | -0.205 | 28 | 14.4  | Q2 |
| IPI00001690 | CUL7     | 1.9  | 6.40E-09  | -0.205 | 2  | 20.2  | Q2 |
| IPI00218465 | PLAA     | 20.1 | 2.15E-152 | -0.205 | 9  | 20.6  | Q2 |
| IPI00219160 | RPL34    | 36.8 | 9.14E-10  | -0.203 | 8  | 8.7   | Q2 |
| IPI00216237 | RPL36    | 30.5 | 1.31E-10  | -0.203 | 8  | 16.2  | Q2 |
| IPI00220301 | PRDX6    | 78.6 | <1.0E-304 | -0.202 | 23 | 34.8  | Q2 |
| IPI00154603 | FGF2     | 6.2  | 1.16E-03  | -0.202 | 6  | 26.0  | Q2 |
| IPI00015947 | DNAJB1   | 22.9 | 5.15E-12  | -0.201 | 4  | 26.2  | Q2 |
| IPI00657752 | CD81     | 21.5 | 8.60E-141 | -0.201 | 9  | 19.4  | Q2 |
| IPI00909773 | UBE2L3   | 25.9 | 6.17E-212 | -0.200 | 9  | 82.5  | Q2 |
| IPI00000811 | PSMB6    | 17.6 | 1.02E-20  | -0.200 | 4  | 5.9   | Q2 |
| IPI00878611 | RANBP1   | 25.4 | 1.38E-32  | -0.199 | 5  | 8.5   | Q2 |
| IPI00008240 | MARS     | 26.6 | <1.0E-304 | -0.199 | 15 | 8.1   | Q2 |
| IPI00014533 | UBTF     | 8    | 6.16E-19  | -0.198 | 3  | 7.4   | Q2 |
| IPI00016249 | FXR1     | 16.4 | 1.52E-85  | -0.198 | 5  | 62.7  | Q2 |

|             |             |      |           |        |    |       |    |
|-------------|-------------|------|-----------|--------|----|-------|----|
| IPI00297982 | EIF2S3      | 41.3 | 1.31E-272 | -0.198 | 15 | 54.7  | Q2 |
| IPI00555647 | TRA2B       | 15.6 | 7.71E-71  | -0.198 | 4  | 6.8   | Q2 |
| IPI00059292 | MAGOHB      | 49.3 | 2.73E-25  | -0.198 | 3  | 12.0  | Q2 |
| IPI00021840 | RPS6        | 33.3 | 5.17E-110 | -0.196 | 8  | 11.4  | Q2 |
| IPI00290043 | ITGA3       | 5.6  | 1.07E-24  | -0.195 | 5  | 23.3  | Q2 |
| IPI00908913 | hCG_2043421 | 28.6 | 2.18E-35  | -0.194 | 4  | 33.6  | Q2 |
| IPI00291893 | DCUN1D1     | 17.4 | 3.29E-68  | -0.193 | 2  | 11.1  | Q2 |
| IPI00746360 | RIC8A       | 24.3 | 1.44E-109 | -0.193 | 7  | 21.6  | Q2 |
| IPI00293078 | DDX27       | 9.5  | 1.65E-23  | -0.192 | 5  | 22.0  | Q2 |
| IPI00020042 | PSMC4       | 52.4 | 1.10E-277 | -0.191 | 11 | 69.8  | Q2 |
| IPI00658155 | MRPS34      | 13.3 | 2.52E-04  | -0.191 | 3  | 30.6  | Q2 |
| IPI00217943 | RAB6A       | 54.8 | 3.42E-125 | -0.190 | 8  | 21.2  | Q2 |
| IPI00005657 | PFDN6       | 24   | 3.05E-22  | -0.189 | 3  | 3.6   | Q2 |
| IPI00871856 | STIP1       | 55.4 | <1.0E-304 | -0.189 | 22 | 20.2  | Q2 |
| IPI00004312 | STAT2       | 29.5 | 3.44E-227 | -0.188 | 21 | 103.9 | Q2 |
| IPI00300504 | UPF2        | 2.6  | 3.74E-04  | -0.188 | 2  | 24.8  | Q2 |
| IPI00873403 | RPL24       | 28.9 | 8.02E-48  | -0.187 | 11 | 14.8  | Q2 |
| IPI00006970 | MRPS2       | 7.5  | 7.07E-04  | -0.187 | 2  | 31.5  | Q2 |
| IPI00604620 | NCL         | 38.7 | <1.0E-304 | -0.186 | 53 | 42.9  | Q2 |
| IPI00790214 | RCN2        | 18.8 | 4.01E-166 | -0.186 | 4  | 7.9   | Q2 |
| IPI00008982 | ALDH18A1    | 44.3 | <1.0E-304 | -0.186 | 29 | 39.0  | Q2 |
| IPI00443909 | CNPY2       | 42.9 | 1.16E-126 | -0.186 | 6  | 8.1   | Q2 |
| IPI00179713 | IGF2BP2     | 32.7 | 3.52E-239 | -0.185 | 16 | 13.2  | Q2 |
| IPI00790743 | RPL36AL     | 34.1 | 3.84E-12  | -0.184 | 7  | 7.4   | Q2 |
| IPI00007404 | ATG7        | 4    | 5.21E-45  | -0.184 | 2  | 9.7   | Q2 |
| IPI00022827 | SLK         | 14.6 | 1.08E-62  | -0.184 | 13 | 11.0  | Q2 |
| IPI00009607 | RAP2C       | 4.9  | 7.47E-50  | -0.183 | 2  | 5.6   | Q2 |
| IPI00470779 | TXLNA       | 20.1 | 1.01E-30  | -0.183 | 4  | 16.5  | Q2 |
| IPI00013949 | SGTA        | 13.1 | 9.67E-25  | -0.183 | 3  | 3.3   | Q2 |
| IPI00027175 | SRI         | 23.7 | 3.15E-18  | -0.182 | 5  | 13.5  | Q2 |
| IPI00013219 | ILK         | 40.9 | 1.63E-96  | -0.182 | 11 | 6.0   | Q2 |
| IPI00465233 | EIF3EIP     | 41.8 | <1.0E-304 | -0.182 | 22 | 14.0  | Q2 |
| IPI00003348 | GNB2        | 13.5 | 9.76E-211 | -0.182 | 5  | 21.2  | Q2 |

|             |          |      |           |        |     |      |    |
|-------------|----------|------|-----------|--------|-----|------|----|
| IPI00022265 | CCDC22   | 25   | 1.50E-100 | -0.182 | 5   | 27.8 | Q2 |
| IPI00871695 | DEK      | 15.3 | 2.08E-23  | -0.181 | 7   | 15.4 | Q2 |
| IPI00301364 | SKP1     | 33.1 | 1.66E-84  | -0.181 | 2   | 34.1 | Q2 |
| IPI00217056 | LEPREL2  | 27.4 | 6.20E-216 | -0.180 | 14  | 12.1 | Q2 |
| IPI00168479 | APOA1BP  | 18.6 | 6.11E-108 | -0.179 | 4   | 13.9 | Q2 |
| IPI00472442 | PSMA1    | 55   | 7.76E-129 | -0.178 | 8   | 11.6 | Q2 |
| IPI00915363 | RPS24    | 16.3 | 3.78E-76  | -0.176 | 7   | 15.3 | Q2 |
| IPI00016915 | IGFBP7   | 16.3 | 2.15E-80  | -0.176 | 2   | 2.8  | Q2 |
| IPI00220014 | IDI1     | 13.7 | 3.48E-33  | -0.176 | 4   | 3.1  | Q2 |
| IPI00791086 | EIF3D    | 28.5 | 1.63E-185 | -0.176 | 7   | 13.0 | Q2 |
| IPI00000051 | PFDN1    | 23   | 2.80E-14  | -0.175 | 2   | 14.0 | Q2 |
| IPI00031556 | U2AF2    | 29.7 | 1.38E-212 | -0.174 | 5   | 16.0 | Q2 |
| IPI00184311 | ENPP1    | 3.9  | 2.44E-24  | -0.174 | 2   | 26.2 | Q2 |
| IPI00792743 | SLTM     | 2.3  | 5.05E-11  | -0.173 | 2   | 18.3 | Q2 |
| IPI00029601 | CTTN     | 47.6 | <1.0E-304 | -0.172 | 37  | 18.9 | Q2 |
| IPI00550689 | C22orf28 | 23.8 | 2.18E-84  | -0.171 | 9   | 18.7 | Q2 |
| IPI00009032 | SSB      | 35   | 6.61E-98  | -0.171 | 10  | 23.3 | Q2 |
| IPI00394737 | OSBPL8   | 26.7 | 1.14E-205 | -0.170 | 21  | 53.3 | Q2 |
| IPI00011689 | EEF2K    | 3.2  | 2.48E-02  | -0.170 | 2   | 2.2  | Q2 |
| IPI00465436 | CAT      | 27.1 | 1.67E-193 | -0.170 | 8   | 10.7 | Q2 |
| IPI00872817 | GLIPR2   | 27.9 | 1.04E-88  | -0.167 | 3   | 17.3 | Q2 |
| IPI00178440 | EEF1B2   | 32.9 | 1.23E-146 | -0.167 | 5   | 46.3 | Q2 |
| IPI00009320 | TMEM85   | 26.8 | 2.30E-57  | -0.167 | 2   | 5.7  | Q2 |
| IPI00394668 | ADAR     | 12.7 | 2.00E-69  | -0.166 | 9   | 13.6 | Q2 |
| IPI00005780 | OGT      | 8.4  | 2.71E-21  | -0.166 | 4   | 12.1 | Q2 |
| IPI00413100 | PHLDB1   | 6    | 1.90E-51  | -0.166 | 4   | 44.8 | Q2 |
| IPI00221222 | SUB1     | 31.5 | 1.91E-44  | -0.166 | 8   | 17.9 | Q2 |
| IPI00024642 | CCDC47   | 15.7 | 2.45E-34  | -0.166 | 3   | 10.4 | Q2 |
| IPI00003362 | HSPA5    | 55.6 | <1.0E-304 | -0.165 | 103 | 59.2 | Q2 |
| IPI00470535 | CACNA2D1 | 1.8  | 2.43E-06  | -0.165 | 2   | 52.0 | Q2 |
| IPI00789101 | PTGES3   | 37.6 | 6.24E-69  | -0.164 | 5   | 5.8  | Q2 |
| IPI00302712 | DYNC112  | 18.8 | 2.10E-161 | -0.163 | 6   | 14.4 | Q2 |
| IPI00031691 | RPL9     | 59.9 | 2.66E-170 | -0.163 | 9   | 77.3 | Q2 |

|             |          |      |           |        |    |       |    |
|-------------|----------|------|-----------|--------|----|-------|----|
| IPI00642584 | KIAA0090 | 23.6 | 6.05E-118 | -0.163 | 13 | 12.8  | Q2 |
| IPI00219155 | RPL27    | 55.1 | 4.37E-29  | -0.163 | 11 | 13.5  | Q2 |
| IPI00300074 | FARSB    | 31.7 | 8.91E-111 | -0.162 | 16 | 37.7  | Q2 |
| IPI00217831 | ANKRD13A | 13.4 | 5.40E-44  | -0.161 | 2  | 13.8  | Q2 |
| IPI00008438 | RPS10    | 46.7 | 1.68E-146 | -0.161 | 11 | 7.0   | Q2 |
| IPI00382412 | BCAT1    | 12.8 | 4.21E-28  | -0.160 | 3  | 11.3  | Q2 |
| IPI00022745 | MVD      | 8.5  | 2.11E-34  | -0.160 | 2  | 5.4   | Q2 |
| IPI00014311 | CUL2     | 19.4 | 2.66E-79  | -0.160 | 6  | 12.1  | Q2 |
| IPI00872430 | RPS8     | 55.3 | 2.38E-186 | -0.160 | 16 | 66.0  | Q2 |
| IPI00008454 | DNAJB11  | 7.8  | 5.55E-115 | -0.159 | 3  | 5.6   | Q2 |
| IPI00925713 | RPL10    | 48.3 | 3.71E-127 | -0.159 | 17 | 63.3  | Q2 |
| IPI00027096 | MRPL19   | 11.3 | 1.20E-04  | -0.159 | 2  | 7.1   | Q2 |
| IPI00329672 | MYO1E    | 19.6 | 1.03E-188 | -0.159 | 16 | 116.3 | Q2 |
| IPI00014624 | AP3S1    | 18.1 | 5.97E-40  | -0.158 | 3  | 13.2  | Q2 |
| IPI00783736 | PTMS     | 16.4 | 9.71E-17  | -0.158 | 2  | 11.9  | Q2 |
| IPI00297211 | SMARCA5  | 19.8 | 3.52E-53  | -0.158 | 16 | 26.8  | Q2 |
| IPI00171903 | HNRNPM   | 58.9 | <1.0E-304 | -0.158 | 63 | 32.3  | Q2 |
| IPI00328840 | THOC4    | 34.1 | 4.35E-103 | -0.158 | 5  | 29.8  | Q2 |
| IPI00020898 | RPS6KA3  | 23.6 | 4.68E-54  | -0.157 | 8  | 11.2  | Q2 |
| IPI00017375 | SEC23A   | 52.3 | <1.0E-304 | -0.157 | 34 | 15.3  | Q2 |
| IPI00883647 | IK       | 3.2  | 6.39E-05  | -0.157 | 3  | 32.5  | Q2 |
| IPI00003519 | EFTUD2   | 34.3 | <1.0E-304 | -0.156 | 22 | 9.9   | Q2 |
| IPI00102897 | RABL3    | 12.7 | 3.22E-13  | -0.155 | 2  | 6.6   | Q2 |
| IPI00215948 | CTNNA1   | 59.4 | <1.0E-304 | -0.155 | 51 | 10.2  | Q2 |
| IPI00328318 | AGL      | 7.1  | 8.41E-92  | -0.155 | 3  | 34.8  | Q2 |
| IPI00219299 | TLN2     | 14.9 | <1.0E-304 | -0.155 | 17 | 21.7  | Q2 |
| IPI00014577 | RAB18    | 50.5 | 4.09E-114 | -0.155 | 5  | 11.3  | Q2 |
| IPI00025273 | GART     | 35.5 | 5.33E-257 | -0.155 | 24 | 8.2   | Q2 |
| IPI00399265 | TPD52L2  | 55.9 | <1.0E-304 | -0.153 | 14 | 13.8  | Q2 |
| IPI00026268 | GNB1     | 33.2 | 2.91E-265 | -0.153 | 12 | 76.3  | Q2 |
| IPI00018140 | SYNCRIP  | 41.1 | 3.64E-298 | -0.153 | 36 | 54.2  | Q2 |
| IPI00009822 | SRP54    | 29.6 | 8.15E-162 | -0.153 | 2  | 7.3   | Q2 |
| IPI00013455 | CLIP1    | 10.7 | 1.32E-64  | -0.152 | 9  | 41.0  | Q2 |

|             |           |      |           |        |    |       |    |
|-------------|-----------|------|-----------|--------|----|-------|----|
| IPI00012578 | KPNA4     | 15.4 | 4.87E-148 | -0.152 | 4  | 24.4  | Q2 |
| IPI00182540 | CTNND1    | 38.1 | 1.09E-300 | -0.152 | 25 | 16.0  | Q2 |
| IPI00219729 | SLC25A11  | 38.9 | 1.38E-65  | -0.151 | 7  | 70.6  | Q2 |
| IPI00216008 | G6PD      | 55.3 | 9.39E-226 | -0.150 | 33 | 30.1  | Q2 |
| IPI00008569 | YKT6      | 43.4 | 1.92E-119 | -0.150 | 8  | 61.0  | Q2 |
| IPI00296147 | TMEM119   | 12.4 | 4.08E-39  | -0.150 | 5  | 23.5  | Q2 |
| IPI00413160 | TRIOBP    | 5.1  | 2.55E-88  | -0.150 | 6  | 9.8   | Q2 |
| IPI00005613 | U2AF1     | 25.8 | 2.27E-98  | -0.149 | 7  | 30.4  | Q2 |
| IPI00240812 | PDS5B     | 7.8  | 8.68E-40  | -0.148 | 7  | 13.6  | Q2 |
| IPI00328319 | RBBP4     | 21.2 | 1.26E-77  | -0.148 | 7  | 15.7  | Q2 |
| IPI00022824 | SH3GLB1   | 26.9 | 1.96E-63  | -0.148 | 9  | 12.9  | Q2 |
| IPI00294891 | NOP2      | 10.8 | 1.84E-52  | -0.148 | 6  | 6.2   | Q2 |
| IPI00797603 | PRPSAP1   | 15.1 | 6.69E-37  | -0.146 | 2  | 15.3  | Q2 |
| IPI00465361 | RPL13     | 52.6 | 2.28E-42  | -0.146 | 15 | 116.5 | Q2 |
| IPI00107555 | PFN2      | 24.5 | 7.10E-41  | -0.146 | 3  | 12.5  | Q2 |
| IPI00013271 | DERL1     | 16.3 | 4.85E-19  | -0.146 | 3  | 5.3   | Q2 |
| IPI00017704 | COTL1     | 59.9 | 1.51E-75  | -0.145 | 11 | 22.7  | Q2 |
| IPI00411680 | PCMT1     | 31.6 | 4.19E-154 | -0.144 | 4  | 26.0  | Q2 |
| IPI00218486 | SSH3      | 5.3  | 1.96E-02  | -0.144 | 3  | 9.8   | Q2 |
| IPI00793443 | IPO5      | 41.7 | <1.0E-304 | -0.144 | 50 | 45.2  | Q2 |
| IPI00217920 | ALDH16A1  | 11.7 | 1.70E-49  | -0.143 | 3  | 5.6   | Q2 |
| IPI00456630 | FNDC3A    | 2.5  | 4.33E-03  | -0.143 | 2  | 38.3  | Q2 |
| IPI00747764 | KPNA6     | 15.5 | 3.89E-138 | -0.143 | 7  | 35.3  | Q2 |
| IPI00006211 | VAPB      | 29.2 | 1.50E-60  | -0.143 | 3  | 14.0  | Q2 |
| IPI00100151 | XRN2      | 12.6 | 1.02E-93  | -0.143 | 7  | 13.8  | Q2 |
| IPI00643342 | PEA15     | 54.3 | 5.99E-180 | -0.143 | 9  | 40.5  | Q2 |
| IPI00183626 | PTBP1     | 54.9 | <1.0E-304 | -0.143 | 26 | 82.0  | Q2 |
| IPI00759799 | HBEBP2BPA | 11.4 | 8.73E-19  | -0.142 | 3  | 58.4  | Q2 |
| IPI00479905 | NDUFB10   | 36.6 | 1.41E-35  | -0.142 | 3  | 9.5   | Q2 |
| IPI00018627 | NAT13     | 33.7 | 1.27E-23  | -0.142 | 5  | 16.4  | Q2 |
| IPI00477155 | GTPBP4    | 12.5 | 1.43E-20  | -0.141 | 3  | 10.6  | Q2 |
| IPI00027626 | CCT6A     | 47.8 | <1.0E-304 | -0.141 | 35 | 38.0  | Q2 |
| IPI00152377 | STT3B     | 8.6  | 8.12E-56  | -0.141 | 7  | 26.4  | Q2 |

|             |        |      |           |        |    |       |    |
|-------------|--------|------|-----------|--------|----|-------|----|
| IPI00873222 | CCT4   | 61.6 | <1.0E-304 | -0.140 | 36 | 35.4  | Q2 |
| IPI00100796 | CHMP5  | 11.4 | 1.18E-20  | -0.139 | 3  | 16.6  | Q2 |
| IPI00893746 | NHP2L1 | 37.1 | 3.81E-32  | -0.139 | 5  | 13.2  | Q2 |
| IPI00030275 | TRAP1  | 18.5 | 6.91E-107 | -0.139 | 4  | 9.9   | Q2 |
| IPI00719680 | AP3D1  | 19.7 | 9.99E-208 | -0.138 | 13 | 13.6  | Q2 |
| IPI00025039 | FBL    | 29.9 | 1.66E-22  | -0.138 | 5  | 6.4   | Q2 |
| IPI00215884 | SFRS1  | 43.5 | 8.02E-121 | -0.137 | 11 | 21.0  | Q2 |
| IPI00016513 | RAB10  | 45.5 | 5.16E-58  | -0.137 | 8  | 16.8  | Q2 |
| IPI00010460 | AIP    | 20.3 | 2.48E-23  | -0.137 | 4  | 6.2   | Q2 |
| IPI00000001 | STAU1  | 6.2  | 5.61E-30  | -0.137 | 2  | 13.7  | Q2 |
| IPI00410693 | SERBP1 | 37.7 | 2.82E-152 | -0.136 | 9  | 12.0  | Q2 |
| IPI00298558 | PDCD10 | 23.6 | 4.43E-18  | -0.135 | 4  | 10.2  | Q2 |
| IPI00294211 | DHX38  | 4.2  | 1.94E-46  | -0.134 | 3  | 17.7  | Q2 |
| IPI00013774 | HDAC1  | 17   | 1.97E-48  | -0.134 | 3  | 9.2   | Q2 |
| IPI00029012 | EIF3A  | 49.6 | <1.0E-304 | -0.134 | 62 | 41.2  | Q2 |
| IPI00000643 | BAG2   | 40.3 | 9.98E-82  | -0.134 | 9  | 21.2  | Q2 |
| IPI00746351 | DIS3   | 9.6  | 2.17E-50  | -0.133 | 3  | 15.6  | Q2 |
| IPI00158615 | THOC2  | 2.5  | 2.94E-14  | -0.133 | 3  | 1.2   | Q2 |
| IPI00010438 | SNAP23 | 40.8 | 9.77E-72  | -0.132 | 4  | 17.9  | Q2 |
| IPI00010136 | CTBP2  | 8.5  | 2.49E-21  | -0.132 | 6  | 16.2  | Q2 |
| IPI00024466 | UGCGL1 | 39.5 | <1.0E-304 | -0.131 | 51 | 30.5  | Q2 |
| IPI00794956 | SCFD1  | 30.8 | <1.0E-304 | -0.131 | 8  | 6.3   | Q2 |
| IPI00003704 | RBM4   | 11.8 | 1.13E-05  | -0.130 | 2  | 19.7  | Q2 |
| IPI00301280 | TMEM43 | 41.2 | 5.95E-142 | -0.130 | 8  | 9.8   | Q2 |
| IPI00059242 | SYAP1  | 6.5  | 4.98E-46  | -0.130 | 2  | 22.1  | Q2 |
| IPI00419258 | HMGB1  | 51.6 | 1.16E-227 | -0.130 | 14 | 17.3  | Q2 |
| IPI00019169 | SH3GL1 | 31   | 3.27E-172 | -0.129 | 7  | 20.3  | Q2 |
| IPI00642904 | PABPC4 | 16.1 | <1.0E-304 | -0.129 | 10 | 36.6  | Q2 |
| IPI00894395 | PSMB9  | 21   | 2.94E-13  | -0.129 | 3  | 18.1  | Q2 |
| IPI00010204 | SFRS3  | 43.3 | 7.48E-48  | -0.128 | 13 | 10.2  | Q2 |
| IPI00871843 | TGM2   | 48.3 | <1.0E-304 | -0.128 | 53 | 135.6 | Q2 |
| IPI00069750 | PUF60  | 27.9 | 8.62E-91  | -0.128 | 8  | 9.3   | Q2 |
| IPI00002525 | NENF   | 20.3 | 9.05E-28  | -0.127 | 3  | 63.0  | Q2 |



|             |         |      |           |        |     |      |    |
|-------------|---------|------|-----------|--------|-----|------|----|
| IPI00018246 | HK1     | 48.9 | <1.0E-304 | -0.127 | 59  | 88.7 | Q2 |
| IPI00297492 | STT3A   | 22.3 | 5.73E-127 | -0.126 | 23  | 61.6 | Q2 |
| IPI00470649 | NCLN    | 13.3 | 2.14E-45  | -0.126 | 5   | 7.2  | Q2 |
| IPI00030877 | 40436   | 23   | 2.68E-62  | -0.126 | 3   | 21.9 | Q2 |
| IPI00455210 | CHD4    | 13.1 | 1.46E-175 | -0.126 | 15  | 22.2 | Q2 |
| IPI00030847 | TM9SF3  | 11.2 | 1.97E-12  | -0.125 | 4   | 15.8 | Q2 |
| IPI00748145 | GNAI2   | 47.9 | 7.66E-259 | -0.125 | 18  | 7.9  | Q2 |
| IPI00376005 | EIF5A   | 60.9 | <1.0E-304 | -0.124 | 27  | 13.5 | Q2 |
| IPI00019407 | NSDHL   | 21.4 | 1.25E-34  | -0.124 | 5   | 7.1  | Q2 |
| IPI00016613 | CSNK2A1 | 21.7 | 9.44E-73  | -0.124 | 6   | 6.7  | Q2 |
| IPI00796333 | ALDOA   | 71.3 | <1.0E-304 | -0.124 | 45  | 19.8 | Q2 |
| IPI00011619 | PAPSS1  | 8.7  | 2.19E-74  | -0.123 | 3   | 11.2 | Q2 |
| IPI00030131 | TMPO    | 34.8 | 1.30E-130 | -0.123 | 14  | 17.4 | Q2 |
| IPI00640703 | XPO5    | 2.8  | 1.28E-10  | -0.122 | 3   | 3.5  | Q2 |
| IPI00013683 | TUBB3   | 27.6 | <1.0E-304 | -0.122 | 24  | 61.8 | Q2 |
| IPI00169383 | PGK1    | 83.2 | <1.0E-304 | -0.122 | 69  | 54.4 | Q2 |
| IPI00456969 | DYNC1H1 | 54   | <1.0E-304 | -0.121 | 402 | 93.9 | Q2 |
| IPI00216951 | DARS    | 47.5 | 3.94E-116 | -0.120 | 14  | 9.8  | Q2 |
| IPI00514501 | C1orf57 | 29.8 | 3.92E-28  | -0.120 | 2   | 4.3  | Q2 |
| IPI00007423 | ANP32B  | 37.1 | 6.24E-143 | -0.120 | 15  | 8.7  | Q2 |
| IPI00016339 | RAB5C   | 47.7 | 3.40E-227 | -0.119 | 13  | 36.9 | Q2 |
| IPI00026833 | ADSS    | 17.8 | 4.54E-91  | -0.119 | 4   | 14.3 | Q2 |
| IPI00741970 | STRN4   | 2.9  | 1.94E-11  | -0.119 | 2   | 9.3  | Q2 |
| IPI00017842 | TP53I11 | 9.4  | 2.97E-04  | -0.118 | 3   | 27.3 | Q2 |
| IPI00456758 | RPL27A  | 37.8 | 1.72E-35  | -0.118 | 5   | 9.5  | Q2 |
| IPI00294065 | GOLGA5  | 6.4  | 3.08E-26  | -0.118 | 4   | 17.5 | Q2 |
| IPI00186969 | SCYL1   | 15.6 | 1.25E-76  | -0.118 | 6   | 6.1  | Q2 |
| IPI00298961 | XPO1    | 40.6 | <1.0E-304 | -0.117 | 41  | 28.1 | Q2 |
| IPI00297084 | DDOST   | 38.4 | 5.57E-212 | -0.117 | 22  | 52.6 | Q2 |
| IPI00217030 | RPS4X   | 68.4 | 6.66E-219 | -0.116 | 27  | 35.7 | Q2 |
| IPI00018873 | NAMPT   | 37.1 | <1.0E-304 | -0.116 | 10  | 11.2 | Q2 |
| IPI00006379 | NOP58   | 23.4 | 2.14E-153 | -0.116 | 8   | 14.4 | Q2 |
| IPI00005978 | SFRS2   | 28.1 | 2.11E-100 | -0.116 | 3   | 4.5  | Q2 |

|             |         |      |           |        |    |      |    |
|-------------|---------|------|-----------|--------|----|------|----|
| IPI00217553 | MRPL41  | 23.4 | 8.36E-04  | -0.116 | 2  | 22.8 | Q2 |
| IPI00168388 | SRP68   | 30.1 | 5.88E-115 | -0.115 | 10 | 14.8 | Q2 |
| IPI00026154 | PRKCSH  | 43.6 | 1.83E-200 | -0.115 | 31 | 10.4 | Q2 |
| IPI00219153 | RPL22   | 59.4 | 2.54E-73  | -0.115 | 7  | 9.4  | Q2 |
| IPI00657805 | XRN1    | 2.5  | 2.08E-08  | -0.113 | 4  | 13.2 | Q2 |
| IPI00908416 | EIF4E   | 23   | 1.47E-30  | -0.113 | 4  | 10.5 | Q2 |
| IPI00549248 | NPM1    | 49.3 | <1.0E-304 | -0.113 | 28 | 49.2 | Q2 |
| IPI00293616 | DDX3Y   | 8.2  | <1.0E-304 | -0.112 | 2  | 2.3  | Q2 |
| IPI00015602 | TOMM70A | 19.9 | 7.83E-134 | -0.112 | 9  | 8.4  | Q2 |
| IPI00002520 | SHMT2   | 38.1 | 9.46E-178 | -0.112 | 15 | 10.7 | Q2 |
| IPI00025160 | VAC14   | 25.6 | 2.08E-129 | -0.111 | 16 | 9.0  | Q2 |
| IPI00783302 | PTCD3   | 11.6 | 1.66E-59  | -0.111 | 2  | 2.4  | Q2 |
| IPI00305267 | GOLGA3  | 27.4 | <1.0E-304 | -0.111 | 16 | 13.5 | Q2 |
| IPI00002790 | SEL1L   | 4.9  | 2.23E-28  | -0.110 | 4  | 59.9 | Q2 |
| IPI00011937 | PRDX4   | 34.3 | 3.18E-126 | -0.110 | 13 | 38.7 | Q2 |
| IPI00220154 | MYO5A   | 3.6  | 2.68E-21  | -0.109 | 3  | 15.4 | Q2 |
| IPI00290460 | EIF3G   | 17.5 | 1.04E-58  | -0.109 | 4  | 7.2  | Q2 |
| IPI00219029 | GOT1    | 41.9 | 5.52E-241 | -0.109 | 12 | 6.7  | Q2 |
| IPI00008530 | RPLP0   | 57.4 | 3.62E-297 | -0.108 | 26 | 66.0 | Q2 |
| IPI00655650 | RPS26   | 27   | 2.00E-33  | -0.108 | 4  | 10.4 | Q2 |
| IPI00873899 | ABCF1   | 15.7 | 2.60E-151 | -0.107 | 14 | 15.1 | Q2 |
| IPI00002408 | RPAP3   | 3.6  | 1.32E-06  | -0.107 | 2  | 5.3  | Q2 |
| IPI00926648 | APEH    | 25.9 | 1.85E-260 | -0.107 | 16 | 20.0 | Q2 |
| IPI00788907 | PGAM5   | 14.5 | 4.55E-03  | -0.106 | 2  | 25.2 | Q2 |
| IPI00025512 | HSPB1   | 87.3 | <1.0E-304 | -0.105 | 46 | 82.1 | Q2 |
| IPI00914529 | RPL28   | 28.4 | 2.56E-20  | -0.105 | 7  | 8.1  | Q2 |
| IPI00220278 | MYL9    | 46.5 | <1.0E-304 | -0.105 | 2  | 2.2  | Q2 |
| IPI00017963 | SNRPD2  | 67.8 | 5.66E-41  | -0.105 | 7  | 10.1 | Q2 |
| IPI00292537 | NFKB1   | 4.9  | 3.73E-14  | -0.105 | 2  | 1.0  | Q2 |
| IPI00221394 | DKC1    | 11.1 | 7.85E-26  | -0.104 | 3  | 13.9 | Q2 |
| IPI00844578 | DHX9    | 43.5 | <1.0E-304 | -0.104 | 65 | 60.1 | Q2 |
| IPI00303195 | SYNC    | 6.8  | 1.31E-25  | -0.104 | 2  | 7.1  | Q2 |
| IPI00020075 | ABHD10  | 19   | 1.81E-88  | -0.104 | 3  | 50.4 | Q2 |

|             |           |      |           |        |    |       |    |
|-------------|-----------|------|-----------|--------|----|-------|----|
| IPI00011916 | AIMP2     | 16.9 | 2.45E-31  | -0.104 | 5  | 5.8   | Q2 |
| IPI00291093 | POLR2E    | 26.2 | 3.58E-68  | -0.104 | 2  | 6.8   | Q2 |
| IPI00026262 | RASA1     | 7.7  | 5.13E-65  | -0.104 | 3  | 3.7   | Q2 |
| IPI00009950 | LMAN2     | 41   | 1.13E-193 | -0.104 | 10 | 37.0  | Q2 |
| IPI00010860 | PSMD9     | 45.3 | 1.73E-42  | -0.104 | 7  | 11.2  | Q2 |
| IPI00028083 | EIF2B2    | 5.1  | 2.76E-91  | -0.104 | 2  | 3.8   | Q2 |
| IPI00074587 | FUSIP1    | 17.2 | 1.02E-69  | -0.104 | 5  | 10.5  | Q2 |
| IPI00555744 | RPL14     | 37.3 | 2.81E-152 | -0.103 | 14 | 46.7  | Q2 |
| IPI00010845 | NDUFS8    | 14.8 | 2.98E-09  | -0.103 | 3  | 13.1  | Q2 |
| IPI00020984 | CANX      | 41.6 | <1.0E-304 | -0.103 | 50 | 40.7  | Q2 |
| IPI00413108 | RPSA      | 56.7 | <1.0E-304 | -0.103 | 20 | 50.7  | Q2 |
| IPI00002252 | CD68      | 8.5  | 2.52E-61  | -0.102 | 2  | 12.3  | Q2 |
| IPI00004273 | RBM25     | 10.8 | 1.37E-29  | -0.102 | 5  | 23.2  | Q2 |
| IPI00238218 | GIT2      | 9.1  | 1.87E-28  | -0.102 | 4  | 6.8   | Q2 |
| IPI00645446 | MCTS1     | 46.7 | 9.97E-120 | -0.102 | 8  | 7.1   | Q2 |
| IPI00419891 | SCFD2     | 6.9  | 9.60E-12  | -0.102 | 2  | 11.4  | Q2 |
| IPI00030328 | SRR       | 13.8 | 3.11E-63  | -0.101 | 2  | 7.4   | Q2 |
| IPI00797126 | NACA      | 7.6  | 7.40E-178 | -0.101 | 14 | 16.5  | Q2 |
| IPI00376689 | KIAA1199  | 28.3 | 1.06E-135 | -0.100 | 16 | 17.2  | Q2 |
| IPI00218487 | GJA1      | 10.2 | 8.69E-14  | -0.100 | 2  | 10.5  | Q2 |
| IPI00022810 | CTSC      | 3.9  | 2.05E-08  | -0.099 | 2  | 14.7  | Q2 |
| IPI00006980 | C14orf166 | 53.3 | 1.54E-169 | -0.098 | 9  | 12.6  | Q2 |
| IPI00215901 | AK2       | 68.6 | 1.17E-108 | -0.098 | 6  | 13.9  | Q2 |
| IPI00217975 | LMNB1     | 51.7 | <1.0E-304 | -0.098 | 20 | 11.5  | Q2 |
| IPI00027200 | NPR1      | 1.4  | 3.54E-02  | -0.098 | 2  | 48.8  | Q2 |
| IPI00827508 | RPL10A    | 51.6 | 3.22E-138 | -0.098 | 9  | 26.9  | Q2 |
| IPI00010080 | OXSRI     | 20.7 | 2.40E-189 | -0.097 | 5  | 20.0  | Q2 |
| IPI00010105 | EIF6      | 32.7 | 5.01E-159 | -0.097 | 6  | 16.9  | Q2 |
| IPI00307155 | ROCK2     | 19.4 | 1.87E-198 | -0.097 | 17 | 15.5  | Q2 |
| IPI00021435 | PSMC2     | 58.7 | 9.02E-230 | -0.096 | 18 | 9.8   | Q2 |
| IPI00000875 | EEF1G     | 43.7 | 6.97E-168 | -0.096 | 38 | 103.5 | Q2 |
| IPI00215919 | ARF5      | 31.7 | 1.59E-150 | -0.095 | 3  | 4.9   | Q2 |
| IPI00396630 | PRKACA    | 26.5 | 3.31E-65  | -0.095 | 6  | 6.4   | Q2 |

|             |          |      |           |        |    |       |    |
|-------------|----------|------|-----------|--------|----|-------|----|
| IPI00643567 | CAP1     | 18.2 | <1.0E-304 | -0.095 | 3  | 154.3 | Q2 |
| IPI00375144 | SRRT     | 26   | 1.57E-64  | -0.095 | 10 | 7.1   | Q2 |
| IPI00032826 | ST13     | 27.4 | 5.32E-126 | -0.094 | 10 | 30.9  | Q2 |
| IPI00009960 | IMMT     | 45.5 | <1.0E-304 | -0.094 | 25 | 58.1  | Q2 |
| IPI00011229 | CTSD     | 48.3 | <1.0E-304 | -0.094 | 32 | 45.7  | Q2 |
| IPI00218606 | RPS23    | 29.4 | 4.28E-22  | -0.094 | 7  | 21.4  | Q2 |
| IPI00009904 | PDIA4    | 53.3 | <1.0E-304 | -0.094 | 50 | 13.8  | Q2 |
| IPI00013862 | DTYMK    | 36.8 | 1.33E-44  | -0.093 | 5  | 10.6  | Q2 |
| IPI00479306 | PSMB5    | 46   | 1.16E-123 | -0.092 | 5  | 14.2  | Q2 |
| IPI00217952 | GFPT1    | 51.4 | <1.0E-304 | -0.092 | 18 | 8.6   | Q2 |
| IPI00783109 | MTSS1L   | 7.2  | 3.32E-10  | -0.091 | 2  | 3.4   | Q2 |
| IPI00008274 | CAP1     | 65.9 | <1.0E-304 | -0.091 | 67 | 115.6 | Q2 |
| IPI00219129 | NQO2     | 36.4 | 7.75E-69  | -0.091 | 4  | 16.3  | Q2 |
| IPI00026530 | LMAN1    | 21.2 | 1.37E-55  | -0.091 | 7  | 106.0 | Q2 |
| IPI00303568 | PTGES2   | 15.9 | 1.16E-20  | -0.090 | 3  | 171.8 | Q2 |
| IPI00438286 | ERBB2IP  | 8    | 6.70E-45  | -0.090 | 4  | 7.8   | Q2 |
| IPI00396321 | LRRCS9   | 43.3 | 4.78E-184 | -0.089 | 18 | 55.6  | Q2 |
| IPI00166749 | PMPCA    | 4.8  | 9.81E-20  | -0.088 | 2  | 2.6   | Q2 |
| IPI00012442 | G3BP1    | 32   | 5.67E-228 | -0.087 | 7  | 24.3  | Q2 |
| IPI00029623 | PSMA6    | 52.8 | 1.69E-167 | -0.086 | 13 | 43.8  | Q2 |
| IPI00021370 | UBE2K    | 39.5 | 5.09E-49  | -0.086 | 5  | 16.6  | Q2 |
| IPI00014398 | FHL1     | 42.1 | 5.57E-149 | -0.086 | 13 | 8.3   | Q2 |
| IPI00031169 | RAB2A    | 61.8 | 5.82E-173 | -0.086 | 13 | 13.6  | Q2 |
| IPI00031517 | MCM6     | 16.6 | 3.82E-79  | -0.085 | 10 | 16.1  | Q2 |
| IPI00168878 | TOR1AIP2 | 9.8  | 6.53E-23  | -0.084 | 2  | 19.0  | Q2 |
| IPI00141318 | CKAP4    | 66.6 | <1.0E-304 | -0.084 | 87 | 47.1  | Q2 |
| IPI00644079 | HNRNPU   | 39.4 | <1.0E-304 | -0.084 | 45 | 46.1  | Q2 |
| IPI00021570 | EDF1     | 36.5 | 4.68E-59  | -0.083 | 4  | 5.6   | Q2 |
| IPI00290928 | GNA13    | 13.5 | 2.64E-66  | -0.082 | 2  | 8.3   | Q2 |
| IPI00010414 | PDLIM1   | 50.8 | 2.08E-262 | -0.082 | 12 | 8.0   | Q2 |
| IPI00641950 | GNB2L1   | 68.2 | <1.0E-304 | -0.082 | 27 | 63.5  | Q2 |
| IPI00018783 | ITPA     | 22.2 | 1.49E-48  | -0.081 | 3  | 9.1   | Q2 |
| IPI00183603 | OSTC     | 14.1 | 2.47E-20  | -0.081 | 4  | 21.4  | Q2 |

|             |          |      |           |        |     |       |    |
|-------------|----------|------|-----------|--------|-----|-------|----|
| IPI00749005 | SYNE1    | 5.8  | 7.57E-114 | -0.080 | 24  | 59.7  | Q2 |
| IPI00413611 | TOP1     | 21.2 | 7.58E-42  | -0.080 | 13  | 11.6  | Q2 |
| IPI00013679 | DUT      | 25.8 | 3.98E-136 | -0.080 | 7   | 13.4  | Q2 |
| IPI00016608 | TMED2    | 27.4 | 2.17E-16  | -0.079 | 4   | 10.1  | Q2 |
| IPI00017256 | RSU1     | 55.2 | 2.61E-147 | -0.078 | 13  | 16.7  | Q2 |
| IPI00000690 | AIFM1    | 22.8 | 1.68E-106 | -0.078 | 8   | 13.8  | Q2 |
| IPI00332493 | PLEKHO2  | 13.7 | 4.69E-41  | -0.078 | 4   | 70.9  | Q2 |
| IPI00924713 | PCYT1A   | 13.2 | 1.13E-20  | -0.077 | 3   | 7.6   | Q2 |
| IPI00419373 | HNRNPA3  | 34.9 | 2.54E-266 | -0.077 | 13  | 8.9   | Q2 |
| IPI00023086 | MRPL15   | 13.5 | 2.35E-06  | -0.077 | 4   | 14.1  | Q2 |
| IPI00300697 | VPS11    | 15   | 1.54E-51  | -0.077 | 10  | 20.0  | Q2 |
| IPI00794402 | ARHGDI A | 47.8 | 5.69E-293 | -0.076 | 13  | 89.2  | Q2 |
| IPI00013468 | BUB3     | 26.2 | 2.33E-36  | -0.076 | 6   | 6.3   | Q2 |
| IPI00019385 | SSR4     | 34.8 | 8.20E-94  | -0.076 | 7   | 8.3   | Q2 |
| IPI00743104 | ITGA1    | 7.7  | 8.65E-27  | -0.076 | 4   | 10.5  | Q2 |
| IPI00398708 | KLC1     | 35.4 | 2.25E-113 | -0.075 | 15  | 14.8  | Q2 |
| IPI00386189 | NARG1    | 22.3 | 1.71E-91  | -0.074 | 18  | 11.9  | Q2 |
| IPI00017184 | EHD1     | 54.7 | 5.72E-248 | -0.074 | 24  | 52.3  | Q2 |
| IPI00219616 | PRPS1    | 28.9 | 6.85E-53  | -0.074 | 8   | 8.4   | Q2 |
| IPI00219097 | HMGB2    | 23.4 | 1.49E-63  | -0.074 | 3   | 10.6  | Q2 |
| IPI00465248 | ENO1     | 81.8 | <1.0E-304 | -0.074 | 103 | 46.5  | Q2 |
| IPI00328154 | UBA3     | 9.5  | 2.38E-29  | -0.073 | 2   | 14.2  | Q2 |
| IPI00221093 | RPS17    | 57   | 5.10E-166 | -0.073 | 13  | 7.5   | Q2 |
| IPI00032830 | REXO2    | 31.2 | 8.48E-76  | -0.073 | 6   | 9.8   | Q2 |
| IPI00441473 | PRMT5    | 14.6 | 5.32E-64  | -0.073 | 7   | 13.6  | Q2 |
| IPI00305978 | AKR7A2   | 24.8 | 1.16E-179 | -0.072 | 7   | 11.8  | Q2 |
| IPI00420014 | SNRNP200 | 33.7 | <1.0E-304 | -0.072 | 50  | 47.9  | Q2 |
| IPI00299063 | STIM1    | 8.2  | 9.37E-23  | -0.072 | 4   | 7.2   | Q2 |
| IPI00026314 | GSN      | 51.3 | <1.0E-304 | -0.072 | 73  | 120.3 | Q2 |
| IPI00418497 | TIMM50   | 14.3 | 8.38E-37  | -0.072 | 4   | 13.6  | Q2 |
| IPI00301021 | SSR1     | 11.9 | 7.66E-77  | -0.071 | 7   | 39.2  | Q2 |
| IPI00000874 | PRDX1    | 67.8 | 8.74E-252 | -0.071 | 37  | 14.0  | Q2 |
| IPI00010346 | NLN      | 17   | 3.43E-68  | -0.071 | 10  | 8.5   | Q2 |

|             |          |      |           |        |     |      |    |
|-------------|----------|------|-----------|--------|-----|------|----|
| IPI00303207 | ABCE1    | 34.9 | 1.87E-303 | -0.070 | 14  | 7.9  | Q2 |
| IPI00396387 | GNL1     | 15.5 | 3.36E-96  | -0.070 | 4   | 43.9 | Q2 |
| IPI00299573 | RPL7A    | 47.4 | 1.46E-169 | -0.070 | 15  | 10.8 | Q2 |
| IPI00001960 | CLIC4    | 85.4 | <1.0E-304 | -0.068 | 23  | 13.0 | Q2 |
| IPI00219518 | ARL1     | 30.9 | 1.20E-56  | -0.068 | 3   | 13.7 | Q2 |
| IPI00025491 | EIF4A1   | 69.2 | <1.0E-304 | -0.068 | 38  | 58.9 | Q2 |
| IPI00604777 | DPP9     | 11.2 | 1.43E-18  | -0.067 | 7   | 24.3 | Q2 |
| IPI00219622 | PSMA2    | 56.8 | 1.49E-274 | -0.067 | 10  | 9.4  | Q2 |
| IPI00298793 | MANBA    | 3.1  | 3.88E-13  | -0.067 | 2   | 6.1  | Q2 |
| IPI00291928 | RAB14    | 62.8 | 8.07E-186 | -0.067 | 21  | 15.4 | Q2 |
| IPI00006865 | SEC22B   | 64.2 | 3.79E-259 | -0.066 | 18  | 16.9 | Q2 |
| IPI00927682 | RAB3GAP1 | 17.2 | 1.14E-57  | -0.066 | 6   | 23.0 | Q2 |
| IPI00333068 | ARPC1A   | 14.9 | 5.45E-33  | -0.065 | 4   | 11.7 | Q2 |
| IPI00844172 | MYO6     | 18.3 | 3.64E-189 | -0.065 | 8   | 19.7 | Q2 |
| IPI00872940 | RPL30    | 68.7 | 2.59E-194 | -0.064 | 13  | 14.4 | Q2 |
| IPI00023640 | PDCD5    | 60.8 | 2.35E-50  | -0.064 | 7   | 25.6 | Q2 |
| IPI00295098 | SRPRB    | 63.5 | 5.49E-201 | -0.063 | 10  | 13.3 | Q2 |
| IPI00024933 | RPL12    | 63.6 | 7.08E-204 | -0.063 | 13  | 16.3 | Q2 |
| IPI00004669 | GALNT2   | 22.8 | 2.24E-136 | -0.063 | 8   | 50.5 | Q2 |
| IPI00014310 | CUL1     | 23.7 | 4.92E-113 | -0.063 | 13  | 36.7 | Q2 |
| IPI00304692 | RBMX     | 34   | 7.04E-102 | -0.062 | 22  | 21.2 | Q2 |
| IPI00607591 | RAP1GDS1 | 40   | 3.93E-225 | -0.062 | 12  | 7.9  | Q2 |
| IPI00910593 | CNN2     | 60.9 | 3.68E-301 | -0.062 | 30  | 77.4 | Q2 |
| IPI00025019 | PSMB1    | 51.5 | 2.22E-234 | -0.062 | 16  | 11.1 | Q2 |
| IPI00022305 | BZW2     | 15.8 | 6.34E-66  | -0.061 | 2   | 0.1  | Q2 |
| IPI00034277 | ATP13A1  | 12.5 | 6.51E-42  | -0.061 | 7   | 14.9 | Q2 |
| IPI00844000 | KIAA0776 | 34.3 | 9.36E-201 | -0.061 | 17  | 18.9 | Q2 |
| IPI00296337 | PRKDC    | 37.8 | <1.0E-304 | -0.061 | 197 | 69.4 | Q2 |
| IPI00784414 | STAT3    | 42.9 | <1.0E-304 | -0.060 | 19  | 8.3  | Q2 |
| IPI00013415 | RPS7     | 67   | 5.38E-129 | -0.058 | 19  | 13.6 | Q2 |
| IPI00022542 | ROCK1    | 16.8 | 1.23E-124 | -0.058 | 9   | 25.4 | Q2 |
| IPI00719752 | EIF3B    | 39.2 | 3.59E-299 | -0.058 | 27  | 20.2 | Q2 |
| IPI00219678 | EIF2S1   | 50.5 | 5.25E-106 | -0.058 | 13  | 9.4  | Q2 |

|             |           |      |           |        |    |      |    |
|-------------|-----------|------|-----------|--------|----|------|----|
| IPI00873410 | CNN3      | 38.4 | <1.0E-304 | -0.056 | 19 | 56.4 | Q2 |
| IPI00005202 | PGRMC2    | 19.4 | 8.72E-88  | -0.056 | 8  | 21.1 | Q2 |
| IPI00030706 | AHSA1     | 26.6 | 2.31E-87  | -0.056 | 4  | 7.9  | Q2 |
| IPI00856045 | AHNAK2    | 41.1 | <1.0E-304 | -0.055 | 77 | 99.4 | Q2 |
| IPI00465432 | NOMO2     | 31.3 | <1.0E-304 | -0.055 | 21 | 16.3 | Q2 |
| IPI00026272 | HIST1H2AB | 8.5  | 1.36E-134 | -0.055 | 3  | 7.7  | Q2 |
| IPI00607554 | USP47     | 6.1  | 1.00E-27  | -0.055 | 3  | 5.9  | Q2 |
| IPI00479262 | EIF4G1    | 27.5 | <1.0E-304 | -0.053 | 46 | 55.5 | Q2 |
| IPI00643747 | C22orf30  | 0.8  | 3.36E-02  | -0.052 | 2  | 3.8  | Q2 |
| IPI00096066 | SUCLG2    | 22   | 2.14E-179 | -0.052 | 5  | 20.1 | Q2 |
| IPI00018465 | CCT7      | 65.6 | <1.0E-304 | -0.052 | 39 | 8.2  | Q2 |
| IPI00328236 | VPS39     | 7.8  | 2.43E-42  | -0.051 | 4  | 56.1 | Q2 |
| IPI00872214 | TBCA      | 49.3 | 9.09E-34  | -0.051 | 9  | 42.8 | Q2 |
| IPI00009374 | GSKIP     | 19.4 | 5.99E-03  | -0.051 | 2  | 3.3  | Q2 |
| IPI00008380 | PPP2CA    | 34   | 1.84E-127 | -0.051 | 6  | 5.4  | Q2 |
| IPI00220766 | GLO1      | 51.1 | 8.26E-127 | -0.051 | 14 | 50.9 | Q2 |
| IPI00002557 | COPG2     | 18.3 | 6.13E-213 | -0.051 | 10 | 16.3 | Q2 |
| IPI00472939 | SPCS2     | 45.8 | 1.49E-118 | -0.050 | 9  | 29.5 | Q2 |
| IPI00658097 | HMG1N1    | 25   | 2.18E-57  | -0.050 | 2  | 6.7  | Q2 |
| IPI00927658 | RPL32     | 39.2 | 1.93E-17  | -0.050 | 5  | 4.2  | Q2 |
| IPI00022403 | MRPL13    | 20.8 | 2.61E-07  | -0.050 | 3  | 13.5 | Q2 |
| IPI00024664 | USP5      | 38.7 | <1.0E-304 | -0.050 | 29 | 48.5 | Q2 |
| IPI00163505 | RBM39     | 19.4 | 2.68E-215 | -0.050 | 9  | 17.7 | Q2 |
| IPI00216694 | PLS3      | 67.1 | <1.0E-304 | -0.049 | 58 | 65.5 | Q2 |
| IPI00647650 | EIF3H     | 29.8 | 1.80E-48  | -0.049 | 8  | 24.2 | Q2 |
| IPI00291646 | MTHFD1L   | 17.7 | 6.04E-133 | -0.049 | 7  | 6.6  | Q2 |
| IPI00012835 | CTBP1     | 13   | 1.44E-50  | -0.049 | 2  | 5.8  | Q2 |
| IPI00014572 | SPARC     | 26.1 | 9.58E-69  | -0.048 | 10 | 10.6 | Q2 |
| IPI00215637 | DDX3X     | 48.3 | <1.0E-304 | -0.048 | 21 | 18.6 | Q2 |
| IPI00783378 | UBE2O     | 3.9  | 9.49E-14  | -0.048 | 3  | 58.9 | Q2 |
| IPI00815713 | TCOF1     | 3.1  | 3.24E-12  | -0.047 | 5  | 81.9 | Q2 |
| IPI00742682 | TPR       | 23.7 | <1.0E-304 | -0.047 | 27 | 13.3 | Q2 |
| IPI00107104 | CXorf26   | 21.9 | 1.14E-24  | -0.047 | 4  | 11.2 | Q2 |

|             |          |      |           |        |    |      |    |
|-------------|----------|------|-----------|--------|----|------|----|
| IPI00024821 | PSMD14   | 44.8 | 1.60E-71  | -0.046 | 4  | 14.8 | Q2 |
| IPI00028055 | TMED10   | 29.2 | 2.82E-197 | -0.046 | 15 | 12.2 | Q2 |
| IPI00007102 | C17orf25 | 17.1 | 2.24E-44  | -0.046 | 6  | 14.4 | Q2 |
| IPI00305438 | VPS16    | 12.6 | 1.60E-146 | -0.045 | 7  | 14.6 | Q2 |
| IPI00000030 | PPP2R5D  | 15.4 | 1.15E-32  | -0.045 | 4  | 7.4  | Q2 |
| IPI00477495 | H2BFS    | 58.7 | 6.89E-74  | -0.044 | 33 | 16.5 | Q2 |
| IPI00000948 | TBL2     | 26.2 | 2.60E-103 | -0.044 | 5  | 7.7  | Q2 |
| IPI00909484 | CDC42    | 34.3 | 9.72E-120 | -0.044 | 8  | 13.1 | Q2 |
| IPI00216319 | YWHAH    | 44.3 | 1.48E-243 | -0.043 | 11 | 12.0 | Q2 |
| IPI00007402 | IPO7     | 25.7 | <1.0E-304 | -0.043 | 21 | 10.4 | Q2 |
| IPI00642971 | EEF1D    | 18.9 | 2.11E-186 | -0.042 | 17 | 24.5 | Q2 |
| IPI00872261 | AHCYL1   | 15.7 | 5.73E-13  | -0.042 | 6  | 9.9  | Q2 |
| IPI00003515 | TRIP11   | 1.8  | 3.75E-06  | -0.042 | 3  | 28.9 | Q2 |
| IPI00016912 | TTC1     | 14.4 | 8.32E-31  | -0.042 | 4  | 9.0  | Q2 |
| IPI00219757 | GSTP1    | 61   | <1.0E-304 | -0.041 | 23 | 17.7 | Q2 |
| IPI00014238 | KARS     | 37   | 3.49E-167 | -0.041 | 14 | 12.1 | Q2 |
| IPI00295851 | COPB1    | 43.8 | <1.0E-304 | -0.041 | 40 | 49.7 | Q2 |
| IPI00024934 | MUT      | 8.5  | 5.78E-23  | -0.041 | 5  | 4.3  | Q2 |
| IPI00005861 | PRPF3    | 7.9  | 2.00E-15  | -0.041 | 4  | 28.6 | Q2 |
| IPI00305551 | GNA11    | 30.9 | 1.62E-111 | -0.041 | 7  | 6.5  | Q2 |
| IPI00332511 | PPP2R2A  | 16.1 | 1.78E-70  | -0.041 | 4  | 9.1  | Q2 |
| IPI00016610 | PCBP1    | 41   | 9.37E-207 | -0.040 | 23 | 74.7 | Q2 |
| IPI00784090 | CCT8     | 54.9 | <1.0E-304 | -0.040 | 27 | 36.1 | Q2 |
| IPI00384689 | PDXDC1   | 16.9 | 5.21E-187 | -0.040 | 6  | 4.9  | Q2 |
| IPI00015944 | EML2     | 7.9  | 5.36E-24  | -0.040 | 3  | 1.9  | Q2 |
| IPI00300585 | RRAGC    | 19.3 | 1.53E-32  | -0.039 | 3  | 5.0  | Q2 |
| IPI00003933 | HAGH     | 5.8  | 7.38E-04  | -0.039 | 2  | 24.9 | Q2 |
| IPI00026970 | SUPT16H  | 19.7 | 2.48E-167 | -0.038 | 12 | 17.8 | Q2 |
| IPI00219445 | PSME3    | 24.7 | 1.46E-75  | -0.038 | 5  | 18.5 | Q2 |
| IPI00293260 | DNAJC10  | 18.2 | 2.89E-147 | -0.038 | 10 | 6.0  | Q2 |
| IPI00000005 | NRAS     | 44.4 | 3.44E-50  | -0.038 | 4  | 10.4 | Q2 |
| IPI00290305 | TP53RK   | 22.1 | 5.66E-10  | -0.037 | 2  | 6.5  | Q2 |
| IPI00384643 | TP53I3   | 24.1 | 9.30E-61  | -0.037 | 7  | 38.4 | Q2 |



|             |          |      |           |        |    |      |    |
|-------------|----------|------|-----------|--------|----|------|----|
| IPI00025815 | TARDBP   | 18   | 7.73E-127 | -0.037 | 4  | 5.7  | Q2 |
| IPI00872177 | PPP1CB   | 16.1 | <1.0E-304 | -0.037 | 5  | 84.0 | Q2 |
| IPI00026328 | TXNDC12  | 17.4 | 1.14E-13  | -0.036 | 3  | 23.2 | Q2 |
| IPI00290142 | CTPS     | 33.8 | <1.0E-304 | -0.036 | 14 | 30.7 | Q2 |
| IPI00410162 | TCEB2    | 43.5 | 4.90E-31  | -0.036 | 5  | 6.9  | Q2 |
| IPI00003217 | PSMB7    | 26   | 5.81E-23  | -0.035 | 4  | 6.7  | Q2 |
| IPI00479722 | PSME1    | 58.6 | 5.04E-243 | -0.035 | 12 | 16.5 | Q2 |
| IPI00554737 | PPP2R1A  | 50.4 | <1.0E-304 | -0.034 | 31 | 10.9 | Q2 |
| IPI00020956 | HDGF     | 23.3 | 6.80E-56  | -0.034 | 5  | 5.2  | Q2 |
| IPI00744851 | HMGA1    | 7.6  | 5.46E-04  | -0.034 | 3  | 17.0 | Q2 |
| IPI00785113 | LRRFIP1  | 10.3 | 1.43E-68  | -0.033 | 2  | 21.2 | Q2 |
| IPI00010201 | PSMD8    | 20.9 | 9.11E-88  | -0.033 | 7  | 17.9 | Q2 |
| IPI00301936 | ELAVL1   | 33.7 | 4.30E-155 | -0.032 | 7  | 7.5  | Q2 |
| IPI00555597 | PTRH2    | 22.2 | 2.53E-39  | -0.032 | 3  | 12.5 | Q2 |
| IPI00219682 | STOM     | 45.1 | <1.0E-304 | -0.032 | 16 | 54.9 | Q2 |
| IPI00332499 | NASP     | 5.9  | 2.03E-14  | -0.032 | 5  | 22.0 | Q2 |
| IPI00172513 | APPL2    | 27.9 | 5.06E-188 | -0.032 | 5  | 33.2 | Q2 |
| IPI00215780 | RPS19    | 64.8 | 6.89E-74  | -0.031 | 14 | 9.0  | Q2 |
| IPI00023510 | RAB5A    | 35.3 | 1.11E-94  | -0.031 | 3  | 9.2  | Q2 |
| IPI00306667 | CNP      | 13.3 | 8.80E-52  | -0.031 | 4  | 12.8 | Q2 |
| IPI00412243 | KIAA1609 | 18.4 | 1.24E-44  | -0.031 | 2  | 25.7 | Q2 |
| IPI00008207 | MAN1B1   | 12.3 | 1.37E-115 | -0.030 | 4  | 22.6 | Q2 |
| IPI00020887 | VAMP7    | 17.3 | 4.11E-28  | -0.029 | 3  | 39.4 | Q2 |
| IPI00026302 | RPL31    | 53.6 | 2.11E-46  | -0.029 | 9  | 14.4 | Q2 |
| IPI00294955 | LSM4     | 25.2 | 7.13E-65  | -0.028 | 3  | 25.6 | Q2 |
| IPI00019004 | SEC62    | 5    | 7.93E-03  | -0.027 | 2  | 8.2  | Q2 |
| IPI00644231 | CYFIP1   | 29.2 | <1.0E-304 | -0.027 | 34 | 39.8 | Q2 |
| IPI00015018 | PPA1     | 44.6 | 1.54E-188 | -0.027 | 11 | 6.6  | Q2 |
| IPI00908768 | HSPB6    | 43.9 | 1.67E-76  | -0.027 | 6  | 19.4 | Q2 |
| IPI00289876 | STX7     | 34.9 | 6.15E-96  | -0.027 | 3  | 15.2 | Q2 |
| IPI00014377 | RAB32    | 57.3 | 3.25E-65  | -0.027 | 5  | 14.4 | Q2 |
| IPI00644708 | TIAL1    | 17.1 | 6.63E-52  | -0.025 | 7  | 21.5 | Q2 |
| IPI00000581 | OTUB1    | 34.1 | 2.06E-106 | -0.025 | 10 | 12.8 | Q2 |

|             |          |      |           |        |    |      |    |
|-------------|----------|------|-----------|--------|----|------|----|
| IPI00783874 | HDHD2    | 8.1  | 2.04E-09  | -0.024 | 2  | 18.3 | Q2 |
| IPI00024175 | PSMA7    | 46.4 | 3.75E-187 | -0.024 | 14 | 10.7 | Q2 |
| IPI00297626 | STXBP3   | 9.5  | 1.47E-21  | -0.024 | 3  | 3.8  | Q2 |
| IPI00419880 | RPS3A    | 61.7 | 3.44E-191 | -0.024 | 24 | 14.7 | Q2 |
| IPI00397366 | PPFIBP1  | 18.2 | 1.31E-95  | -0.024 | 6  | 17.3 | Q2 |
| IPI00182757 | KIAA1967 | 37.8 | <1.0E-304 | -0.023 | 14 | 9.6  | Q2 |
| IPI00009747 | LSS      | 31.1 | 1.35E-231 | -0.023 | 18 | 13.3 | Q2 |
| IPI00658023 | PTPN11   | 32.3 | 9.77E-90  | -0.023 | 7  | 18.5 | Q2 |
| IPI00291200 | NUP133   | 11.6 | 7.94E-129 | -0.022 | 8  | 6.8  | Q2 |
| IPI00023860 | NAP1L1   | 27.4 | 1.48E-258 | -0.021 | 7  | 23.1 | Q2 |
| IPI00017367 | RDX      | 29.3 | 1.59E-292 | -0.021 | 12 | 8.8  | Q2 |
| IPI00024662 | CBX5     | 11   | 8.23E-15  | -0.021 | 2  | 12.9 | Q2 |
| IPI00029046 | MLEC     | 29.5 | 2.89E-138 | -0.021 | 6  | 5.2  | Q2 |
| IPI00012545 | TGOLN2   | 8.3  | 2.44E-23  | -0.021 | 2  | 12.6 | Q2 |
| IPI00025721 | COPS3    | 18.7 | 5.32E-60  | -0.021 | 2  | 23.8 | Q2 |
| IPI00473014 | DSTN     | 83   | 2.66E-148 | -0.021 | 20 | 15.2 | Q2 |
| IPI00026994 | PRAF2    | 16.3 | 2.27E-30  | -0.021 | 5  | 12.9 | Q2 |
| IPI00384280 | PCYOX1   | 35.4 | 1.98E-191 | -0.021 | 19 | 56.1 | Q2 |
| IPI00011253 | RPS3     | 81.9 | 3.74E-280 | -0.020 | 31 | 57.1 | Q2 |
| IPI00219034 | NDUFA8   | 43.6 | 1.34E-83  | -0.020 | 2  | 1.4  | Q2 |
| IPI00219420 | SMC3     | 24.7 | 1.35E-122 | -0.020 | 7  | 37.0 | Q2 |
| IPI00719017 | RAPGEF6  | 5.8  | 1.85E-25  | -0.020 | 2  | 16.4 | Q2 |
| IPI00395694 | TNPO3    | 10   | 6.00E-117 | -0.020 | 7  | 16.9 | Q2 |
| IPI00550733 | TBC1D2B  | 5.6  | 5.78E-05  | -0.019 | 5  | 13.3 | Q2 |
| IPI00013917 | RPS12    | 70.5 | 6.61E-197 | -0.019 | 11 | 9.0  | Q2 |
| IPI00018813 | COPS2    | 26.2 | 5.15E-69  | -0.019 | 2  | 6.4  | Q2 |
| IPI00301518 | MOBKL1B  | 17.1 | 1.13E-08  | -0.018 | 5  | 23.7 | Q2 |
| IPI00016645 | EPHA7    | 3.1  | 1.62E-04  | -0.018 | 3  | 0.2  | Q2 |
| IPI00374272 | C5orf51  | 8.5  | 7.17E-22  | -0.018 | 3  | 7.0  | Q2 |
| IPI00017696 | C1S      | 9.3  | 1.04E-21  | -0.017 | 6  | 26.2 | Q2 |
| IPI00006608 | APP      | 5.8  | 2.65E-09  | -0.017 | 2  | 5.5  | Q2 |
| IPI00604759 | FAHD1    | 32.7 | 1.21E-166 | -0.017 | 5  | 4.3  | Q2 |
| IPI00012448 | CLN3     | 3.4  | 2.18E-12  | -0.016 | 2  | 40.6 | Q2 |

|             |          |      |           |        |    |      |    |
|-------------|----------|------|-----------|--------|----|------|----|
| IPI00288947 | GNAQ     | 19.2 | 1.05E-82  | -0.016 | 2  | 4.2  | Q2 |
| IPI00012750 | RPS25    | 31.2 | 1.14E-32  | -0.016 | 9  | 7.8  | Q2 |
| IPI00413293 | TOR1A    | 14   | 1.14E-15  | -0.016 | 2  | 1.8  | Q2 |
| IPI00298991 | KIAA1033 | 20.5 | 2.37E-234 | -0.015 | 19 | 14.6 | Q2 |
| IPI00164005 | COG7     | 2.6  | 2.49E-04  | -0.015 | 2  | 6.9  | Q2 |
| IPI00655754 | UFD1L    | 20.7 | 2.03E-57  | -0.015 | 4  | 17.5 | Q2 |
| IPI00553185 | CCT3     | 58.3 | <1.0E-304 | -0.014 | 33 | 11.5 | Q2 |
| IPI00410215 | BPNT1    | 5.8  | 1.09E-15  | -0.014 | 2  | 5.6  | Q2 |
| IPI00910088 | AP1M1    | 15.6 | 7.13E-21  | -0.014 | 6  | 6.1  | Q2 |
| IPI00028006 | PSMB2    | 55.7 | 5.14E-142 | -0.014 | 9  | 10.1 | Q2 |
| IPI00872668 | NIT2     | 36   | 7.58E-105 | -0.013 | 6  | 12.8 | Q2 |
| IPI00106646 | SDF4     | 5.2  | 1.09E-03  | -0.013 | 2  | 4.0  | Q2 |
| IPI00030320 | DDX6     | 13.5 | 9.35E-67  | -0.013 | 6  | 15.5 | Q2 |
| IPI00010349 | AGPS     | 16.3 | 5.96E-149 | -0.013 | 5  | 6.1  | Q2 |
| IPI00216975 | TPM4     | 72.2 | <1.0E-304 | -0.012 | 73 | 56.6 | Q2 |
| IPI00395939 | PITPNB   | 37.4 | 8.61E-77  | -0.012 | 3  | 13.8 | Q2 |
| IPI00006052 | PFDN2    | 22.7 | 5.32E-62  | -0.012 | 4  | 10.2 | Q2 |
| IPI00105598 | PSMD11   | 53.7 | 4.88E-158 | -0.012 | 21 | 31.6 | Q2 |
| IPI00305064 | CD44     | 11.7 | 1.37E-95  | -0.011 | 24 | 36.6 | Q2 |
| IPI00900260 | ARHGEF7  | 12   | 1.95E-91  | -0.011 | 4  | 16.3 | Q2 |
| IPI00432718 | SUMF1    | 7    | 2.46E-07  | -0.010 | 2  | 4.4  | Q2 |
| IPI00000816 | YWHAE    | 75.7 | <1.0E-304 | -0.010 | 30 | 27.2 | Q2 |
| IPI00031820 | FARSA    | 22.6 | 1.86E-104 | -0.010 | 4  | 6.3  | Q2 |
| IPI00220642 | YWHAG    | 49   | <1.0E-304 | -0.010 | 15 | 14.3 | Q2 |
| IPI00004860 | RARS     | 40.6 | 2.07E-300 | -0.010 | 22 | 17.8 | Q2 |
| IPI00256861 | MACF1    | 29.4 | <1.0E-304 | -0.009 | 99 | 47.7 | Q2 |
| IPI00005719 | RAB1A    | 69.8 | 1.01E-236 | -0.009 | 25 | 15.9 | Q2 |
| IPI00290110 | PDCD4    | 7.9  | 1.28E-16  | -0.009 | 2  | 10.9 | Q2 |
| IPI00893197 | PPP2R4   | 20.4 | 3.55E-69  | -0.008 | 2  | 6.5  | Q2 |
| IPI00029048 | TTL12    | 20.2 | 1.48E-112 | -0.008 | 3  | 25.7 | Q2 |
| IPI00022334 | OAT      | 40.8 | 8.16E-141 | -0.008 | 9  | 8.7  | Q2 |
| IPI00029731 | RPL35A   | 46.4 | 8.89E-10  | -0.007 | 11 | 13.9 | Q2 |
| IPI00018350 | MCM5     | 18.9 | 1.08E-88  | -0.007 | 6  | 11.2 | Q2 |

|             |          |      |           |        |     |      |    |
|-------------|----------|------|-----------|--------|-----|------|----|
| IPI00328868 | HS1BP3   | 11.2 | 5.18E-142 | -0.007 | 3   | 12.9 | Q2 |
| IPI00221091 | RPS15A   | 49.2 | 4.53E-50  | -0.006 | 14  | 16.4 | Q2 |
| IPI00329563 | UBE2L6   | 9.8  | 2.42E-02  | -0.006 | 2   | 1.8  | Q2 |
| IPI00021728 | EIF2S2   | 30.6 | 1.10E-134 | -0.006 | 6   | 12.9 | Q2 |
| IPI00014808 | PAFAH1B3 | 7.8  | 4.46E-05  | -0.005 | 2   | 7.6  | Q2 |
| IPI00002236 | MFGE8    | 26.1 | 8.16E-126 | -0.005 | 7   | 14.8 | Q2 |
| IPI00014230 | C1QBP    | 36.9 | 5.85E-216 | -0.005 | 4   | 14.1 | Q2 |
| IPI00301419 | COPS7A   | 25.1 | 5.20E-65  | -0.004 | 4   | 10.2 | Q2 |
| IPI00026904 | ADSL     | 18.1 | 7.12E-59  | -0.004 | 3   | 5.2  | Q2 |
| IPI00867509 | CORO1C   | 46.5 | 4.58E-280 | -0.004 | 30  | 66.4 | Q2 |
| IPI00328293 | SRRM1    | 9.5  | 2.05E-21  | -0.004 | 4   | 32.4 | Q2 |
| IPI00550682 | GRHPR    | 32.6 | 5.65E-248 | -0.003 | 10  | 8.4  | Q2 |
| IPI00218858 | MAP2K3   | 20.7 | 1.05E-36  | -0.003 | 3   | 16.3 | Q2 |
| IPI00020454 | DCK      | 6.2  | 7.43E-03  | -0.003 | 2   | 8.1  | Q2 |
| IPI00247063 | MME      | 54.7 | <1.0E-304 | -0.003 | 103 | 29.2 | Q2 |
| IPI00215911 | APEX1    | 48.1 | 1.42E-212 | -0.003 | 14  | 68.3 | Q2 |
| IPI00017617 | DDX5     | 27.4 | 6.85E-143 | -0.003 | 11  | 15.2 | Q2 |
| IPI00072377 | SET      | 19.3 | 5.06E-100 | -0.002 | 11  | 79.8 | Q2 |
| IPI00219037 | H2AFX    | 26.6 | 4.31E-121 | -0.002 | 4   | 14.7 | Q2 |
| IPI00008215 | ME1      | 20.6 | 1.33E-99  | -0.002 | 3   | 26.6 | Q2 |
| IPI00856098 | RRBP1    | 48.2 | <1.0E-304 | -0.002 | 119 | 67.8 | Q2 |
| IPI00022228 | HDLBP    | 52.8 | <1.0E-304 | -0.002 | 72  | 31.8 | Q2 |
| IPI00218268 | OPRS1    | 14.3 | 6.30E-05  | -0.001 | 4   | 8.9  | Q2 |
| IPI00154473 | GFM1     | 10   | 8.02E-44  | 0.000  | 2   | 22.2 | Q2 |
| IPI00554590 | RAB3GAP2 | 15.5 | 1.07E-39  | 0.000  | 10  | 17.8 | Q2 |
| IPI00334159 | VBP1     | 38.2 | 2.58E-56  | 0.000  | 2   | 0.6  | Q2 |
| IPI00396435 | DHX15    | 35.6 | 3.88E-163 | 0.000  | 23  | 27.8 | Q2 |
| IPI00376798 | RPL11    | 39.3 | 7.85E-75  | 0.000  | 8   | 12.9 | Q2 |
| IPI00216318 | YWHAB    | 58.9 | <1.0E-304 | 0.000  | 12  | 8.9  | Q2 |
| IPI00294536 | STRAP    | 56.5 | 1.20E-206 | 0.000  | 8   | 9.4  | Q2 |
| IPI00220271 | AKR1A1   | 60.3 | <1.0E-304 | 0.000  | 18  | 7.1  | Q2 |
| IPI00176903 | PTRF     | 48.5 | <1.0E-304 | 0.001  | 30  | 80.8 | Q2 |
| IPI00027230 | HSP90B1  | 65.5 | <1.0E-304 | 0.001  | 164 | 52.5 | Q2 |

|             |            |      |           |       |    |       |    |
|-------------|------------|------|-----------|-------|----|-------|----|
| IPI00247583 | RPL21      | 46.2 | 2.36E-135 | 0.001 | 4  | 37.1  | Q2 |
| IPI00009480 | COPS8      | 34.9 | 1.46E-117 | 0.001 | 3  | 8.6   | Q2 |
| IPI00026271 | RPS14      | 41.7 | 1.21E-130 | 0.002 | 9  | 7.8   | Q2 |
| IPI00028091 | ACTR3      | 72.5 | 1.86E-300 | 0.002 | 31 | 78.8  | Q2 |
| IPI00008964 | RAB1B      | 31.3 | 6.94E-218 | 0.002 | 4  | 6.5   | Q2 |
| IPI00305010 | CPPED1     | 24.5 | 1.55E-73  | 0.002 | 8  | 10.2  | Q2 |
| IPI00007702 | HSPA2      | 19.1 | <1.0E-304 | 0.002 | 10 | 8.5   | Q2 |
| IPI00514053 | ARCN1      | 39.3 | 2.93E-163 | 0.002 | 18 | 48.1  | Q2 |
| IPI00010153 | RPL23      | 52.9 | 6.09E-207 | 0.003 | 8  | 17.6  | Q2 |
| IPI00641107 | CAPZB      | 64.4 | 2.49E-211 | 0.003 | 28 | 31.1  | Q2 |
| IPI00646304 | PPIB       | 62   | 7.66E-304 | 0.003 | 36 | 14.0  | Q2 |
| IPI00216457 | HIST2H2AA3 | 57.7 | 5.23E-164 | 0.004 | 18 | 23.7  | Q2 |
| IPI00017763 | NAP1L4     | 35   | 1.52E-222 | 0.004 | 11 | 82.4  | Q2 |
| IPI00297477 | SNRPA1     | 41.2 | 1.15E-81  | 0.004 | 11 | 12.5  | Q2 |
| IPI00029997 | PGLS       | 67.1 | 2.10E-302 | 0.005 | 17 | 14.7  | Q2 |
| IPI00926977 | PSMC6      | 49.1 | 2.32E-262 | 0.005 | 15 | 16.0  | Q2 |
| IPI00790064 | NDUFB9     | 19   | 4.45E-53  | 0.006 | 2  | 6.3   | Q2 |
| IPI00745313 | AEBP1      | 9.3  | 2.77E-63  | 0.007 | 3  | 30.0  | Q2 |
| IPI00410485 | TAOK3      | 3.5  | 2.16E-07  | 0.007 | 3  | 39.7  | Q2 |
| IPI00306604 | ITGA5      | 17.7 | 1.15E-203 | 0.007 | 17 | 46.6  | Q2 |
| IPI00006079 | BCLAF1     | 11.4 | 7.21E-21  | 0.007 | 4  | 5.0   | Q2 |
| IPI00182728 | VPS4B      | 16   | 1.67E-47  | 0.008 | 6  | 116.0 | Q2 |
| IPI00304435 | NIPSNAP1   | 26.4 | 4.35E-31  | 0.008 | 4  | 17.1  | Q2 |
| IPI00654582 | TOLLIP     | 14.5 | 6.62E-46  | 0.009 | 7  | 15.1  | Q2 |
| IPI00220644 | PKM2       | 5.8  | <1.0E-304 | 0.009 | 5  | 6.5   | Q2 |
| IPI00026202 | RPL18A     | 46   | 6.17E-97  | 0.009 | 13 | 9.2   | Q2 |
| IPI00012728 | ACSL1      | 19.8 | 6.29E-126 | 0.010 | 9  | 25.8  | Q2 |
| IPI00002324 | MAT2B      | 16.5 | 1.01E-54  | 0.010 | 6  | 12.3  | Q2 |
| IPI00215965 | HNRNPA1    | 43   | <1.0E-304 | 0.010 | 22 | 40.2  | Q2 |
| IPI00921428 | IMPA1      | 16.7 | 8.47E-38  | 0.011 | 4  | 8.1   | Q2 |
| IPI00873622 | WDR1       | 56.5 | <1.0E-304 | 0.011 | 37 | 32.5  | Q2 |
| IPI00028004 | PSMB3      | 36.6 | 3.26E-153 | 0.011 | 9  | 8.6   | Q2 |
| IPI00026627 | RP2        | 5.1  | 1.39E-03  | 0.011 | 2  | 6.8   | Q2 |

|             |           |      |           |       |    |      |    |
|-------------|-----------|------|-----------|-------|----|------|----|
| IPI00006167 | PPM1G     | 13   | 1.19E-19  | 0.011 | 2  | 8.0  | Q2 |
| IPI00026216 | NPEPPS    | 45.8 | 1.33E-287 | 0.011 | 42 | 26.4 | Q2 |
| IPI00000760 | DDAH2     | 54.4 | <1.0E-304 | 0.011 | 9  | 23.1 | Q2 |
| IPI00008475 | HMGCS1    | 12.9 | 1.24E-62  | 0.012 | 2  | 12.7 | Q2 |
| IPI00301263 | CAD       | 22.7 | <1.0E-304 | 0.012 | 34 | 56.1 | Q2 |
| IPI00012795 | EIF3I     | 27.4 | 6.18E-42  | 0.012 | 6  | 5.7  | Q2 |
| IPI00030781 | STAT1     | 50.8 | <1.0E-304 | 0.012 | 30 | 8.2  | Q2 |
| IPI00794613 | TBC1D15   | 11.6 | 1.61E-54  | 0.012 | 4  | 6.7  | Q2 |
| IPI00009104 | RUVBL2    | 38.9 | 7.83E-275 | 0.012 | 9  | 5.5  | Q2 |
| IPI00019450 | TROVE2    | 24.3 | 6.10E-92  | 0.013 | 9  | 54.0 | Q2 |
| IPI00219067 | GSTM2     | 47.2 | 1.39E-167 | 0.013 | 9  | 31.1 | Q2 |
| IPI00290462 | CBR3      | 32.9 | 8.12E-162 | 0.013 | 7  | 14.2 | Q2 |
| IPI00024911 | ERP29     | 47.1 | 1.15E-188 | 0.014 | 12 | 47.9 | Q2 |
| IPI00026848 | LRPAP1    | 31.4 | 9.84E-33  | 0.014 | 11 | 18.6 | Q2 |
| IPI00479997 | STMN1     | 63.1 | 2.38E-47  | 0.016 | 8  | 11.5 | Q2 |
| IPI00299095 | SNX2      | 30.8 | 8.03E-137 | 0.016 | 8  | 7.1  | Q2 |
| IPI00011675 | SP100     | 5.1  | 9.38E-44  | 0.017 | 4  | 20.3 | Q2 |
| IPI00011274 | HNRPDL    | 16.7 | 8.34E-136 | 0.018 | 5  | 63.3 | Q2 |
| IPI00794169 | ANO10     | 1.5  | 1.53E-07  | 0.018 | 2  | 45.5 | Q2 |
| IPI00171412 | SUMF2     | 22.5 | 6.80E-82  | 0.018 | 2  | 9.3  | Q2 |
| IPI00927531 | AP1S1     | 22.5 | 1.35E-36  | 0.018 | 4  | 25.6 | Q2 |
| IPI00219910 | BLVRB     | 46.9 | 2.54E-137 | 0.018 | 12 | 11.2 | Q2 |
| IPI00297779 | CCT2      | 63.7 | <1.0E-304 | 0.018 | 25 | 9.9  | Q2 |
| IPI00033494 | MYL12B    | 68.6 | <1.0E-304 | 0.019 | 20 | 22.3 | Q2 |
| IPI00013296 | RPS18     | 67.1 | 1.59E-81  | 0.019 | 24 | 16.4 | Q2 |
| IPI00005609 | LOH11CR2A | 2.3  | 6.41E-04  | 0.019 | 2  | 4.3  | Q2 |
| IPI00011698 | SAP18     | 15.1 | 1.40E-02  | 0.019 | 3  | 24.8 | Q2 |
| IPI00412607 | RPL35     | 26   | 2.42E-15  | 0.019 | 6  | 11.3 | Q2 |
| IPI00014053 | TOMM40    | 19.1 | 7.93E-27  | 0.020 | 3  | 13.0 | Q2 |
| IPI00015285 | PCYT2     | 9    | 2.22E-33  | 0.020 | 3  | 3.2  | Q2 |
| IPI00021954 | GBF1      | 11.2 | 6.24E-142 | 0.021 | 8  | 19.4 | Q2 |
| IPI00029159 | MRE11A    | 13.9 | 6.96E-103 | 0.021 | 8  | 17.0 | Q2 |
| IPI00297579 | CBX3      | 33.3 | 1.44E-146 | 0.022 | 7  | 13.2 | Q2 |

|             |                |      |           |       |     |       |    |
|-------------|----------------|------|-----------|-------|-----|-------|----|
| IPI00027270 | RPL26          | 41.4 | 8.82E-16  | 0.022 | 17  | 22.2  | Q2 |
| IPI00018522 | PRMT1          | 42.9 | 1.98E-154 | 0.023 | 12  | 13.7  | Q2 |
| IPI00221092 | RPS16          | 69.2 | 1.88E-46  | 0.023 | 19  | 26.8  | Q2 |
| IPI00873253 | SEC11A         | 13.5 | 7.28E-16  | 0.023 | 4   | 4.5   | Q2 |
| IPI00003309 | POLR2H         | 32   | 5.54E-78  | 0.024 | 2   | 13.1  | Q2 |
| IPI00003588 | EEF1E1         | 28.7 | 3.48E-32  | 0.024 | 3   | 19.9  | Q2 |
| IPI00032561 | CAB39          | 19.4 | 1.94E-17  | 0.025 | 5   | 5.1   | Q2 |
| IPI00847342 | KRT7           | 52.7 | 2.03E-236 | 0.025 | 19  | 36.0  | Q2 |
| IPI00218019 | BSG            | 22.9 | 4.78E-101 | 0.025 | 8   | 15.5  | Q2 |
| IPI00746777 | ADH5           | 36.9 | <1.0E-304 | 0.025 | 16  | 11.2  | Q2 |
| IPI00293655 | DDX1           | 52.3 | <1.0E-304 | 0.025 | 24  | 7.5   | Q2 |
| IPI00871851 | NEDD5          | 51   | <1.0E-304 | 0.025 | 19  | 33.9  | Q2 |
| IPI00418213 | RABGEF1        | 5.8  | 4.32E-13  | 0.026 | 2   | 9.8   | Q2 |
| IPI00018398 | PSMC3          | 47.2 | <1.0E-304 | 0.026 | 16  | 12.4  | Q2 |
| IPI00418169 | DKFZp686P03159 | 78.4 | <1.0E-304 | 0.026 | 176 | 52.5  | Q2 |
| IPI00644697 | HEBP2          | 35   | 2.06E-107 | 0.027 | 6   | 16.3  | Q2 |
| IPI00306280 | DENR           | 23.1 | 8.91E-127 | 0.027 | 2   | 1.2   | Q2 |
| IPI00855940 | XPO7           | 14.1 | 9.78E-140 | 0.027 | 9   | 9.1   | Q2 |
| IPI00058192 | POFUT1         | 9.3  | 7.10E-38  | 0.028 | 2   | 49.6  | Q2 |
| IPI00329512 | SNRPB          | 20.8 | 3.14E-62  | 0.030 | 10  | 87.5  | Q2 |
| IPI00917064 | LIMS1          | 14.9 | 3.22E-42  | 0.030 | 5   | 3.0   | Q2 |
| IPI00008433 | RPS5           | 51   | 1.47E-269 | 0.030 | 18  | 9.6   | Q2 |
| IPI00644712 | XRCC6          | 53.4 | <1.0E-304 | 0.030 | 42  | 10.0  | Q2 |
| IPI00009688 | PIP4K2A        | 8.1  | 6.96E-46  | 0.030 | 3   | 255.1 | Q2 |
| IPI00219249 | CNTNAP1        | 14.8 | 3.37E-129 | 0.030 | 11  | 14.2  | Q2 |
| IPI00215914 | ARF1           | 75.7 | 3.56E-273 | 0.031 | 24  | 25.0  | Q2 |
| IPI00796366 | MYL6           | 45   | 2.20E-247 | 0.032 | 23  | 9.6   | Q2 |
| IPI00384051 | PSME2          | 46.6 | 5.91E-175 | 0.032 | 12  | 19.0  | Q2 |
| IPI00334190 | STOML2         | 46.1 | 4.28E-191 | 0.032 | 7   | 4.0   | Q2 |
| IPI00395748 | ACOT7          | 22.7 | 3.40E-115 | 0.032 | 6   | 7.1   | Q2 |
| IPI00917683 | SUMO1          | 13   | 1.58E-06  | 0.033 | 2   | 18.2  | Q2 |
| IPI00291939 | SMC1A          | 14.7 | 2.75E-85  | 0.033 | 13  | 13.3  | Q2 |
| IPI00022229 | APOB           | 0.7  | 5.68E-29  | 0.033 | 4   | 136.4 | Q2 |

|             |          |      |           |       |     |       |    |
|-------------|----------|------|-----------|-------|-----|-------|----|
| IPI00011284 | COMT     | 51.7 | 1.81E-262 | 0.033 | 13  | 15.8  | Q2 |
| IPI00028031 | ACADVL   | 44.2 | <1.0E-304 | 0.034 | 23  | 15.0  | Q2 |
| IPI00479191 | HNRNPH1  | 37.5 | <1.0E-304 | 0.034 | 21  | 47.5  | Q2 |
| IPI00640088 | CSNK2B   | 27.8 | 9.68E-29  | 0.034 | 4   | 19.3  | Q2 |
| IPI00021369 | CRYAB    | 66.3 | 6.60E-146 | 0.034 | 21  | 19.2  | Q2 |
| IPI00411730 | PPP4R1   | 6.3  | 6.49E-32  | 0.034 | 2   | 14.8  | Q2 |
| IPI00178352 | FLNC     | 58.5 | <1.0E-304 | 0.035 | 308 | 106.9 | Q2 |
| IPI00719725 | SAPS3    | 3.8  | 6.29E-04  | 0.036 | 3   | 16.4  | Q2 |
| IPI00409684 | NCKAP1   | 28   | 6.31E-234 | 0.037 | 18  | 12.4  | Q2 |
| IPI00025091 | RPS11    | 62   | 4.37E-53  | 0.037 | 21  | 13.6  | Q2 |
| IPI00015954 | SAR1A    | 48   | 2.42E-100 | 0.038 | 8   | 18.7  | Q2 |
| IPI00012074 | HNRNPR   | 22.4 | 8.71E-165 | 0.039 | 18  | 55.0  | Q2 |
| IPI00008034 | RAB23    | 38.4 | 2.20E-128 | 0.039 | 5   | 11.7  | Q2 |
| IPI00302740 | RPS4Y1   | 22.8 | 2.42E-97  | 0.039 | 6   | 7.6   | Q2 |
| IPI00032134 | SERPINB8 | 23.3 | 4.01E-83  | 0.040 | 4   | 32.5  | Q2 |
| IPI00296526 | NAGK     | 51.3 | 2.48E-287 | 0.040 | 18  | 13.7  | Q2 |
| IPI00012093 | STK25    | 1.6  | 8.49E-42  | 0.040 | 3   | 4.8   | Q2 |
| IPI00436355 | PRKG1    | 18.4 | 2.10E-122 | 0.040 | 6   | 29.3  | Q2 |
| IPI00555956 | PSMB4    | 40.9 | 1.96E-206 | 0.040 | 3   | 8.9   | Q2 |
| IPI00012011 | CFL1     | 91.6 | <1.0E-304 | 0.041 | 40  | 22.1  | Q2 |
| IPI00009328 | EIF4A3   | 34.8 | 1.52E-129 | 0.041 | 6   | 4.8   | Q2 |
| IPI00427330 | SBDS     | 54.4 | 2.45E-40  | 0.042 | 10  | 19.4  | Q2 |
| IPI00550451 | PPP1CA   | 51.2 | <1.0E-304 | 0.042 | 19  | 13.0  | Q2 |
| IPI00903286 | SNRPD1   | 29.5 | 8.90E-78  | 0.042 | 3   | 5.0   | Q2 |
| IPI00031670 | FAM114A1 | 24.7 | 2.95E-220 | 0.042 | 11  | 11.3  | Q2 |
| IPI00152998 | LRRC40   | 17.4 | 9.33E-15  | 0.043 | 4   | 14.5  | Q2 |
| IPI00239077 | HINT1    | 58.7 | 5.38E-71  | 0.043 | 4   | 13.8  | Q2 |
| IPI00291922 | PSMA5    | 52.7 | 3.67E-204 | 0.043 | 9   | 16.9  | Q2 |
| IPI00027180 | ZMPSTE24 | 6.7  | 1.54E-68  | 0.043 | 3   | 5.3   | Q2 |
| IPI00304925 | HSPA1A   | 49.9 | <1.0E-304 | 0.044 | 38  | 29.0  | Q2 |
| IPI00009057 | G3BP2    | 15.1 | 2.78E-73  | 0.044 | 2   | 5.5   | Q2 |
| IPI00001639 | KPNB1    | 43.7 | <1.0E-304 | 0.044 | 60  | 15.7  | Q2 |
| IPI00479743 | POTEE    | 2.4  | <1.0E-304 | 0.046 | 2   | 6.4   | Q2 |



|             |         |      |           |       |    |       |    |
|-------------|---------|------|-----------|-------|----|-------|----|
| IPI00328113 | FBN1    | 2    | 1.00E-21  | 0.046 | 5  | 21.0  | Q2 |
| IPI00033025 | SEPT7   | 35.6 | <1.0E-304 | 0.046 | 12 | 46.1  | Q2 |
| IPI00171844 | COPS4   | 27.3 | 4.54E-125 | 0.047 | 5  | 2.8   | Q2 |
| IPI00003327 | ARL3    | 37.9 | 1.01E-67  | 0.047 | 5  | 13.4  | Q2 |
| IPI00064193 | TMX3    | 13.7 | 6.31E-49  | 0.047 | 5  | 14.3  | Q2 |
| IPI00103252 | RWDD4A  | 10.1 | 7.96E-05  | 0.048 | 2  | 2.9   | Q2 |
| IPI00003881 | HNRNPF  | 19.5 | 9.12E-205 | 0.048 | 10 | 6.1   | Q2 |
| IPI00023529 | CDK6    | 9.2  | 1.33E-23  | 0.048 | 2  | 6.4   | Q2 |
| IPI00016669 | RHEB    | 32.1 | 8.68E-73  | 0.048 | 2  | 1.8   | Q2 |
| IPI00163230 | COPS6   | 21.1 | 4.80E-25  | 0.049 | 5  | 64.9  | Q2 |
| IPI00329482 | LAMA4   | 7.6  | 1.11E-142 | 0.049 | 7  | 23.3  | Q2 |
| IPI00001676 | NPLOC4  | 22.9 | 2.86E-229 | 0.049 | 7  | 6.8   | Q2 |
| IPI00293613 | TBK1    | 4.5  | 6.83E-06  | 0.050 | 2  | 39.5  | Q2 |
| IPI00219217 | LDHB    | 54.8 | <1.0E-304 | 0.050 | 55 | 63.2  | Q2 |
| IPI00007346 | PPIH    | 22   | 6.35E-10  | 0.051 | 3  | 18.7  | Q2 |
| IPI00916847 | OLA1    | 17.3 | 6.42E-109 | 0.051 | 12 | 10.1  | Q2 |
| IPI00438170 | SNX12   | 42.4 | 1.26E-57  | 0.051 | 7  | 19.6  | Q2 |
| IPI00298547 | PARK7   | 78.8 | 1.12E-249 | 0.051 | 25 | 10.8  | Q2 |
| IPI00013871 | RRM1    | 9.1  | 6.00E-24  | 0.051 | 2  | 11.1  | Q2 |
| IPI00386258 | MTCH1   | 8    | 3.30E-12  | 0.052 | 2  | 13.9  | Q2 |
| IPI00008167 | ATP1B3  | 21.1 | 1.03E-61  | 0.053 | 5  | 12.3  | Q2 |
| IPI00220739 | PGRMC1  | 40.5 | 1.36E-134 | 0.053 | 8  | 22.9  | Q2 |
| IPI00922855 | TUBGCP2 | 3.2  | 4.99E-05  | 0.054 | 2  | 123.6 | Q2 |
| IPI00642238 | HP1BP3  | 27.1 | 3.27E-139 | 0.054 | 17 | 29.0  | Q2 |
| IPI00002857 | MAPK14  | 16.4 | 1.57E-25  | 0.055 | 2  | 25.6  | Q2 |
| IPI00020436 | RAB11B  | 50.9 | 1.79E-184 | 0.055 | 13 | 12.6  | Q2 |
| IPI00221089 | RPS13   | 44.4 | 2.85E-113 | 0.055 | 13 | 11.3  | Q2 |
| IPI00009906 | ARMCX3  | 15   | 5.07E-25  | 0.055 | 2  | 6.2   | Q2 |
| IPI00025277 | PDCD6   | 44   | 3.81E-48  | 0.056 | 4  | 5.1   | Q2 |
| IPI00735181 | UNC45A  | 26.5 | 7.14E-257 | 0.056 | 13 | 22.5  | Q2 |
| IPI00021327 | GRB2    | 27.2 | 2.45E-12  | 0.056 | 2  | 9.6   | Q2 |
| IPI00171438 | TXNDC5  | 28.5 | 1.45E-159 | 0.056 | 23 | 20.5  | Q2 |
| IPI00012837 | KIF5B   | 53   | <1.0E-304 | 0.056 | 36 | 10.4  | Q2 |

|             |           |      |           |       |     |      |    |
|-------------|-----------|------|-----------|-------|-----|------|----|
| IPI00382452 | CHMP1A    | 21.4 | 5.10E-05  | 0.057 | 2   | 12.1 | Q2 |
| IPI00303954 | CYB5B     | 12   | 1.15E-19  | 0.057 | 2   | 14.7 | Q2 |
| IPI00025874 | RPN1      | 58.8 | <1.0E-304 | 0.057 | 39  | 53.3 | Q2 |
| IPI00021187 | RUVBL1    | 35.7 | 3.87E-222 | 0.057 | 12  | 8.0  | Q2 |
| IPI00879750 | SNRPD3    | 22.9 | 6.98E-13  | 0.058 | 3   | 11.4 | Q2 |
| IPI00397947 | UBE2V1    | 17   | 8.67E-19  | 0.058 | 10  | 3.7  | Q2 |
| IPI00927150 | CHCHD3    | 18.3 | 3.12E-87  | 0.058 | 3   | 10.6 | Q2 |
| IPI00031479 | PDIA5     | 14.1 | 2.50E-18  | 0.058 | 5   | 7.3  | Q2 |
| IPI00032831 | SNAP29    | 16.7 | 2.19E-17  | 0.059 | 3   | 45.1 | Q2 |
| IPI00001091 | AFG3L2    | 17.4 | 6.00E-45  | 0.059 | 9   | 14.9 | Q2 |
| IPI00012535 | DNAJA1    | 23.7 | 1.96E-40  | 0.060 | 4   | 7.8  | Q2 |
| IPI00028957 | UBE4A     | 9.4  | 8.40E-41  | 0.060 | 4   | 26.2 | Q2 |
| IPI00008164 | PREP      | 26.3 | 2.51E-287 | 0.060 | 7   | 16.6 | Q2 |
| IPI00794659 | RPS20     | 28.9 | 1.47E-47  | 0.060 | 8   | 11.1 | Q2 |
| IPI00296259 | TMED4     | 12.3 | 3.63E-59  | 0.061 | 2   | 1.9  | Q2 |
| IPI00027415 | DHX36     | 5.4  | 5.11E-57  | 0.061 | 3   | 20.2 | Q2 |
| IPI00396593 | PDLIM2    | 17.3 | 3.69E-67  | 0.061 | 3   | 1.1  | Q2 |
| IPI00006675 | ABCC4     | 10   | 3.65E-28  | 0.062 | 5   | 22.2 | Q2 |
| IPI00019927 | PSMD7     | 26.2 | 1.42E-156 | 0.062 | 5   | 57.9 | Q2 |
| IPI00220219 | COPB2     | 47.8 | <1.0E-304 | 0.062 | 35  | 50.4 | Q2 |
| IPI00011126 | PSMC1     | 28.6 | 7.34E-181 | 0.063 | 5   | 8.4  | Q2 |
| IPI00151462 | MAP1LC3B2 | 22.4 | 1.57E-02  | 0.063 | 2   | 4.4  | Q2 |
| IPI00011250 | UCHL3     | 22.6 | 3.50E-65  | 0.064 | 3   | 4.9  | Q2 |
| IPI00007061 | GOLT1B    | 10.9 | 1.89E-13  | 0.064 | 2   | 27.7 | Q2 |
| IPI00010796 | P4HB      | 67.9 | <1.0E-304 | 0.064 | 113 | 50.7 | Q2 |
| IPI00003168 | PRPSAP2   | 7.3  | 5.75E-18  | 0.064 | 3   | 30.7 | Q2 |
| IPI00030941 | TSPAN3    | 5.5  | 4.40E-02  | 0.064 | 3   | 4.2  | Q2 |
| IPI00025084 | CAPNS1    | 66.8 | <1.0E-304 | 0.064 | 17  | 38.9 | Q2 |
| IPI00017895 | GPD2      | 26.4 | 3.02E-157 | 0.065 | 11  | 16.5 | Q2 |
| IPI00032292 | TIMP1     | 24.6 | 9.12E-26  | 0.065 | 2   | 2.0  | Q2 |
| IPI00554742 | API5      | 19.2 | 1.43E-104 | 0.065 | 8   | 18.1 | Q2 |
| IPI00017334 | PHB       | 67.6 | 5.15E-262 | 0.065 | 14  | 71.0 | Q2 |
| IPI00022744 | CSE1L     | 45.6 | <1.0E-304 | 0.065 | 47  | 27.6 | Q2 |

|             |           |      |           |       |     |      |    |
|-------------|-----------|------|-----------|-------|-----|------|----|
| IPI00006725 | DDX23     | 15   | 7.55E-39  | 0.065 | 10  | 12.6 | Q2 |
| IPI00018146 | YWHAQ     | 55.5 | <1.0E-304 | 0.065 | 24  | 36.7 | Q2 |
| IPI00005159 | ACTR2     | 46.2 | 9.32E-187 | 0.066 | 19  | 15.4 | Q2 |
| IPI00063827 | ABHD14B   | 27.1 | 3.45E-17  | 0.066 | 7   | 16.3 | Q2 |
| IPI00027078 | CPD       | 15.9 | 4.17E-107 | 0.066 | 14  | 28.2 | Q2 |
| IPI00748472 | KIAA0196  | 23.5 | 4.40E-182 | 0.066 | 22  | 27.9 | Q2 |
| IPI00218733 | SOD1      | 50   | 5.13E-187 | 0.066 | 3   | 0.5  | Q2 |
| IPI00295386 | CBR1      | 75.1 | <1.0E-304 | 0.066 | 26  | 17.4 | Q2 |
| IPI00026781 | FASN      | 53.5 | <1.0E-304 | 0.067 | 214 | 84.8 | Q2 |
| IPI00419856 | TNPO2     | 1.1  | 4.37E-28  | 0.067 | 2   | 12.7 | Q2 |
| IPI00005648 | SAFB2     | 13.4 | 2.28E-75  | 0.067 | 5   | 81.7 | Q2 |
| IPI00022891 | SLC25A4   | 13.4 | 1.49E-124 | 0.068 | 5   | 24.6 | Q2 |
| IPI00031131 | APMAP     | 27.9 | 5.18E-63  | 0.068 | 9   | 7.1  | Q2 |
| IPI00411559 | SMC4      | 6.5  | 1.80E-24  | 0.069 | 8   | 90.7 | Q2 |
| IPI00025252 | PDIA3     | 65   | <1.0E-304 | 0.069 | 64  | 44.8 | Q2 |
| IPI00030255 | PLOD3     | 42.5 | <1.0E-304 | 0.069 | 27  | 22.8 | Q2 |
| IPI00023006 | ACTC1     | 46.9 | <1.0E-304 | 0.069 | 34  | 76.8 | Q2 |
| IPI00747810 | FSCN1     | 54.6 | <1.0E-304 | 0.070 | 34  | 27.3 | Q2 |
| IPI00186290 | EEF2      | 63.9 | <1.0E-304 | 0.070 | 190 | 72.0 | Q2 |
| IPI00550523 | ATL3      | 29.8 | 8.33E-121 | 0.070 | 5   | 9.5  | Q2 |
| IPI00908469 | TUBB6     | 12.9 | <1.0E-304 | 0.071 | 6   | 3.9  | Q2 |
| IPI00003935 | HIST2H2BE | 13.5 | 1.22E-71  | 0.071 | 5   | 16.1 | Q2 |
| IPI00796864 | DPM1      | 38   | 6.46E-72  | 0.071 | 5   | 21.3 | Q2 |
| IPI00892784 | ATP6V0A1  | 5.8  | 4.20E-17  | 0.071 | 6   | 15.1 | Q2 |
| IPI00005087 | TMOD3     | 34.9 | 3.00E-137 | 0.072 | 6   | 10.2 | Q2 |
| IPI00216171 | ENO2      | 23.3 | <1.0E-304 | 0.073 | 3   | 17.2 | Q2 |
| IPI00022774 | VCP       | 64.4 | <1.0E-304 | 0.073 | 112 | 62.9 | Q2 |
| IPI00221327 | RTCD1     | 15   | 6.87E-15  | 0.073 | 4   | 28.0 | Q2 |
| IPI00029764 | SF3A3     | 18.6 | 1.12E-71  | 0.073 | 5   | 9.6  | Q2 |
| IPI00007755 | RAB21     | 39.1 | 2.06E-101 | 0.073 | 3   | 8.0  | Q2 |
| IPI00002966 | HSPA4     | 52.7 | <1.0E-304 | 0.074 | 45  | 7.9  | Q2 |
| IPI00165393 | ANP32E    | 14.6 | 1.20E-53  | 0.074 | 4   | 10.0 | Q2 |
| IPI00177509 | TRAPPC5   | 18.6 | 3.12E-14  | 0.074 | 3   | 13.9 | Q2 |

|             |          |      |           |       |    |      |    |
|-------------|----------|------|-----------|-------|----|------|----|
| IPI00304171 | H2AFY    | 37.1 | 1.53E-170 | 0.075 | 9  | 8.2  | Q2 |
| IPI00843975 | EZR      | 43.2 | <1.0E-304 | 0.075 | 32 | 54.9 | Q2 |
| IPI00009315 | ACBD3    | 24.6 | 6.53E-82  | 0.075 | 3  | 6.6  | Q2 |
| IPI00219301 | MARCKS   | 36.1 | 9.40E-250 | 0.076 | 6  | 28.2 | Q2 |
| IPI00004436 | LSM1     | 39.1 | 7.35E-19  | 0.077 | 2  | 10.8 | Q2 |
| IPI00871500 | TBC1D3P2 | 1.9  | 1.86E-01  | 0.078 | 2  | 10.8 | Q2 |
| IPI00009225 | STX8     | 24.6 | 1.18E-87  | 0.078 | 3  | 20.8 | Q2 |
| IPI00171611 | HIST2H3A | 57.4 | 9.32E-171 | 0.078 | 21 | 20.4 | Q2 |
| IPI00641829 | BAT1     | 41.3 | 5.86E-188 | 0.078 | 23 | 43.1 | Q2 |
| IPI00925052 | ARPC4    | 41.7 | 7.71E-42  | 0.078 | 10 | 10.8 | Q2 |
| IPI00465256 | AK3      | 54.2 | 5.87E-193 | 0.079 | 7  | 46.1 | Q2 |
| IPI00872754 | STK24    | 21.7 | 7.11E-123 | 0.079 | 6  | 15.7 | Q2 |
| IPI00853598 | SEC13    | 35.1 | <1.0E-304 | 0.080 | 7  | 10.1 | Q2 |
| IPI00016910 | EIF3C    | 30.2 | 1.39E-241 | 0.081 | 22 | 23.8 | Q2 |
| IPI00550239 | H1FO     | 27.8 | 1.16E-21  | 0.081 | 2  | 13.1 | Q2 |
| IPI00185374 | PSMD12   | 45.6 | 7.23E-166 | 0.081 | 15 | 13.5 | Q2 |
| IPI00257059 | TMEM173  | 18.7 | 6.51E-140 | 0.082 | 4  | 5.8  | Q2 |
| IPI00026665 | QARS     | 50.7 | <1.0E-304 | 0.082 | 29 | 8.7  | Q2 |
| IPI00010154 | GDI1     | 47.4 | <1.0E-304 | 0.082 | 18 | 32.4 | Q2 |
| IPI00871827 | RPL7     | 52.2 | 4.20E-175 | 0.082 | 23 | 9.2  | Q2 |
| IPI00006092 | PMM2     | 29.3 | 8.86E-22  | 0.082 | 5  | 6.6  | Q2 |
| IPI00148063 | HEBP1    | 62.4 | 6.17E-117 | 0.083 | 5  | 11.5 | Q2 |
| IPI00218475 | IFI35    | 19.1 | 4.37E-17  | 0.083 | 3  | 17.0 | Q2 |
| IPI00910977 | MPST     | 24   | 2.18E-88  | 0.083 | 5  | 11.9 | Q2 |
| IPI00001985 | VPS18    | 12.9 | 2.13E-69  | 0.083 | 6  | 9.2  | Q2 |
| IPI00642259 | DST      | 13.1 | <1.0E-304 | 0.084 | 23 | 29.0 | Q2 |
| IPI00029079 | GMPS     | 28.1 | 2.36E-175 | 0.084 | 9  | 10.7 | Q2 |
| IPI00300299 | SPCS3    | 21.7 | 3.44E-35  | 0.084 | 4  | 21.9 | Q2 |
| IPI00218693 | APRT     | 57.2 | 1.22E-65  | 0.084 | 5  | 16.0 | Q2 |
| IPI00604664 | NDUFS1   | 39.4 | <1.0E-304 | 0.084 | 15 | 42.1 | Q2 |
| IPI00299571 | PDIA6    | 49.2 | <1.0E-304 | 0.085 | 29 | 34.0 | Q2 |
| IPI00003326 | ARL2     | 16.8 | 1.65E-20  | 0.085 | 2  | 8.0  | Q2 |
| IPI00294158 | BLVRA    | 39.9 | 5.22E-62  | 0.085 | 7  | 13.5 | Q2 |

|             |           |      |           |       |     |      |    |
|-------------|-----------|------|-----------|-------|-----|------|----|
| IPI00289535 | PMPCB     | 4.1  | 2.76E-03  | 0.085 | 2   | 0.5  | Q2 |
| IPI00299000 | PA2G4     | 34   | 1.17E-98  | 0.087 | 14  | 9.0  | Q2 |
| IPI00018871 | ARL8B     | 45   | 5.00E-118 | 0.087 | 9   | 14.9 | Q2 |
| IPI00253036 | CD99      | 13   | 2.98E-05  | 0.087 | 3   | 24.9 | Q2 |
| IPI00215918 | ARF4      | 38.9 | 2.51E-199 | 0.088 | 9   | 7.0  | Q2 |
| IPI00642211 | RNPEP     | 43.5 | 3.43E-235 | 0.089 | 17  | 16.0 | Q2 |
| IPI00015148 | RAP1B     | 67.4 | 1.61E-187 | 0.089 | 18  | 14.1 | Q2 |
| IPI00218924 | CHP       | 20   | 2.48E-45  | 0.090 | 4   | 16.3 | Q2 |
| IPI00074604 | GLMN      | 5.4  | 7.82E-07  | 0.090 | 2   | 3.7  | Q2 |
| IPI00903119 | SMS       | 9    | 2.00E-05  | 0.090 | 3   | 45.6 | Q2 |
| IPI00604590 | NME1-NME2 | 70.9 | 3.41E-205 | 0.091 | 35  | 18.2 | Q2 |
| IPI00003766 | ETHE1     | 36.2 | 2.02E-67  | 0.091 | 8   | 12.8 | Q2 |
| IPI00025158 | STAG1     | 3.1  | 1.20E-04  | 0.092 | 3   | 15.8 | Q2 |
| IPI00304596 | NONO      | 46.1 | <1.0E-304 | 0.092 | 21  | 81.9 | Q2 |
| IPI00216691 | PFN1      | 91.4 | <1.0E-304 | 0.092 | 47  | 16.7 | Q2 |
| IPI00745568 | TIPRL     | 38.6 | 3.71E-19  | 0.092 | 3   | 22.3 | Q2 |
| IPI00815770 | SNX3      | 69.8 | 2.65E-64  | 0.092 | 11  | 62.5 | Q2 |
| IPI00004968 | PRPF19    | 24.4 | 5.10E-70  | 0.092 | 6   | 10.5 | Q2 |
| IPI00154975 | DNAJC9    | 26.9 | 1.32E-11  | 0.094 | 3   | 10.1 | Q2 |
| IPI00013068 | EIF3E     | 47.2 | 2.47E-284 | 0.094 | 11  | 7.3  | Q2 |
| IPI00021805 | MGST1     | 27.1 | 1.46E-48  | 0.095 | 3   | 4.1  | Q2 |
| IPI00009958 | COPS5     | 26.9 | 7.45E-16  | 0.095 | 6   | 5.5  | Q2 |
| IPI00216003 | CUL5      | 12.5 | 2.98E-27  | 0.095 | 7   | 13.9 | Q2 |
| IPI00065500 | BROX      | 20.4 | 1.31E-43  | 0.096 | 4   | 32.2 | Q2 |
| IPI00033143 | EIF3K     | 16.5 | 6.75E-40  | 0.096 | 2   | 7.9  | Q2 |
| IPI00646779 | TUBB6     | 24.6 | <1.0E-304 | 0.097 | 10  | 4.5  | Q2 |
| IPI00029081 | LIG3      | 2.7  | 1.36E-07  | 0.097 | 3   | 6.8  | Q2 |
| IPI00015361 | PFDN5     | 54.5 | 1.07E-196 | 0.097 | 3   | 31.3 | Q2 |
| IPI00219446 | PEBP1     | 84   | <1.0E-304 | 0.098 | 16  | 12.0 | Q2 |
| IPI00005724 | LANCL1    | 10.3 | 1.90E-21  | 0.098 | 4   | 13.9 | Q2 |
| IPI00744692 | TALDO1    | 47.8 | 1.79E-146 | 0.098 | 18  | 10.6 | Q2 |
| IPI00219018 | GAPDH     | 84.8 | <1.0E-304 | 0.099 | 133 | 39.4 | Q2 |
| IPI00023919 | PSMC5     | 47.5 | 5.17E-229 | 0.099 | 13  | 8.6  | Q2 |

|             |          |      |           |       |    |      |    |
|-------------|----------|------|-----------|-------|----|------|----|
| IPI00013698 | ASAH1    | 13.2 | 4.15E-28  | 0.100 | 5  | 6.9  | Q2 |
| IPI00375380 | PSMD13   | 49.5 | 7.30E-210 | 0.100 | 17 | 22.1 | Q2 |
| IPI00011416 | ECH1     | 26.8 | 9.16E-137 | 0.101 | 4  | 9.0  | Q2 |
| IPI00396527 | KLRAQ1   | 6.3  | 2.75E-15  | 0.101 | 3  | 21.3 | Q2 |
| IPI00470883 | STAG2    | 2.1  | 1.42E-07  | 0.102 | 2  | 0.3  | Q2 |
| IPI00026182 | CAPZA2   | 32.2 | 2.28E-89  | 0.102 | 7  | 5.5  | Q2 |
| IPI00293464 | DDB1     | 35   | 1.06E-238 | 0.102 | 39 | 18.5 | Q2 |
| IPI00028481 | RAB8A    | 25.1 | 2.62E-77  | 0.103 | 7  | 12.3 | Q2 |
| IPI00021417 | SART1    | 12.1 | 1.90E-96  | 0.104 | 6  | 11.7 | Q2 |
| IPI00243221 | NRD1     | 15.3 | 4.66E-117 | 0.104 | 11 | 25.5 | Q2 |
| IPI00413344 | CFL2     | 45.8 | 2.57E-260 | 0.105 | 6  | 26.9 | Q2 |
| IPI00020599 | CALR     | 64.7 | <1.0E-304 | 0.106 | 51 | 50.4 | Q2 |
| IPI00414676 | HSP90AB1 | 34.1 | <1.0E-304 | 0.106 | 53 | 48.2 | Q2 |
| IPI00884192 | GPX4     | 33.8 | 9.09E-63  | 0.106 | 7  | 12.7 | Q2 |
| IPI00394994 | C14orf49 | 4    | 4.51E-22  | 0.106 | 3  | 11.4 | Q2 |
| IPI00646917 | NUDT21   | 48.9 | 9.21E-160 | 0.107 | 10 | 16.1 | Q2 |
| IPI00005198 | ILF2     | 32.6 | 2.10E-245 | 0.107 | 18 | 23.8 | Q2 |
| IPI00032498 | DCTN5    | 14.8 | 5.20E-12  | 0.108 | 3  | 3.3  | Q2 |
| IPI00017469 | SPR      | 29.1 | 4.69E-234 | 0.108 | 6  | 38.4 | Q2 |
| IPI00333143 | DGKA     | 10.2 | 1.66E-48  | 0.109 | 3  | 17.4 | Q2 |
| IPI00295542 | NUCB1    | 21.9 | 8.75E-118 | 0.109 | 10 | 31.0 | Q2 |
| IPI00303602 | AIDA     | 11.4 | 5.65E-10  | 0.109 | 3  | 7.9  | Q2 |
| IPI00645078 | UBA1     | 47.8 | <1.0E-304 | 0.109 | 72 | 44.1 | Q2 |
| IPI00549389 | METTL11A | 19.6 | 2.44E-62  | 0.109 | 3  | 3.0  | Q2 |
| IPI00746030 | PLCD1    | 12   | 1.09E-46  | 0.109 | 9  | 31.3 | Q2 |
| IPI00914539 | ANKFY1   | 18.7 | 8.95E-109 | 0.110 | 9  | 10.5 | Q2 |
| IPI00894498 | ACTB     | 4.5  | <1.0E-304 | 0.110 | 15 | 63.6 | Q2 |
| IPI00152900 | LZIC     | 11.8 | 7.70E-05  | 0.110 | 2  | 13.1 | Q2 |
| IPI00018311 | NPTN     | 9.3  | 3.60E-10  | 0.110 | 5  | 4.6  | Q2 |
| IPI00927606 | GPX1     | 42.4 | 4.82E-108 | 0.110 | 5  | 4.4  | Q2 |
| IPI00894409 | CPNE1    | 21.6 | 2.14E-140 | 0.110 | 8  | 6.2  | Q2 |
| IPI00646556 | NDUFV2   | 13.5 | 2.90E-41  | 0.111 | 3  | 17.3 | Q2 |
| IPI00220648 | PMVK     | 35.9 | 2.84E-17  | 0.111 | 4  | 32.6 | Q2 |

|             |          |      |           |       |     |       |    |
|-------------|----------|------|-----------|-------|-----|-------|----|
| IPI00328753 | KTN1     | 39.2 | <1.0E-304 | 0.111 | 40  | 14.7  | Q2 |
| IPI00218728 | PAFAH1B1 | 23.4 | 5.75E-76  | 0.111 | 8   | 14.1  | Q2 |
| IPI00007940 | ERLIN1   | 17.5 | 2.18E-134 | 0.111 | 5   | 82.8  | Q2 |
| IPI00294911 | SDHB     | 34.3 | 1.21E-92  | 0.112 | 7   | 8.4   | Q2 |
| IPI00783313 | PYGL     | 38.6 | 3.49E-260 | 0.112 | 30  | 69.8  | Q2 |
| IPI00021263 | YWHAZ    | 69.8 | <1.0E-304 | 0.112 | 31  | 12.4  | Q2 |
| IPI00003565 | PSMD10   | 16.4 | 2.71E-08  | 0.112 | 3   | 30.2  | Q2 |
| IPI00450472 | UBE2I    | 33.7 | 8.00E-28  | 0.112 | 3   | 10.7  | Q2 |
| IPI00465238 | C16orf62 | 10.4 | 6.86E-50  | 0.112 | 7   | 8.8   | Q2 |
| IPI00219953 | CMPK1    | 46.1 | 4.87E-273 | 0.113 | 8   | 15.4  | Q2 |
| IPI00013723 | PIN1     | 47.2 | 1.63E-121 | 0.114 | 4   | 29.8  | Q2 |
| IPI00384456 | MSH6     | 6.2  | 3.30E-22  | 0.114 | 4   | 108.1 | Q2 |
| IPI00220503 | DCTN2    | 42.6 | <1.0E-304 | 0.115 | 13  | 9.1   | Q2 |
| IPI00872664 | USP14    | 26.5 | 4.82E-150 | 0.116 | 11  | 17.2  | Q2 |
| IPI00006451 | NSF      | 47.8 | <1.0E-304 | 0.116 | 39  | 10.9  | Q2 |
| IPI00027434 | RHOC     | 18.7 | 2.33E-299 | 0.116 | 4   | 8.9   | Q2 |
| IPI00549664 | TEX10    | 10.7 | 4.48E-97  | 0.117 | 6   | 18.1  | Q2 |
| IPI00020470 | GLT8D1   | 5.4  | 6.38E-04  | 0.117 | 2   | 19.0  | Q2 |
| IPI00021700 | PCNA     | 58.6 | 5.39E-192 | 0.118 | 12  | 12.2  | Q2 |
| IPI00011631 | ZW10     | 12.3 | 4.82E-101 | 0.118 | 6   | 52.8  | Q2 |
| IPI00887461 | HLA-B    | 29.3 | 3.54E-170 | 0.118 | 9   | 6.8   | Q2 |
| IPI00168407 | PDPR     | 7.1  | 2.67E-54  | 0.118 | 4   | 4.4   | Q2 |
| IPI00021808 | HARS     | 37.9 | 8.29E-136 | 0.119 | 14  | 12.7  | Q2 |
| IPI00219365 | MSN      | 75.6 | <1.0E-304 | 0.119 | 116 | 71.4  | Q2 |
| IPI00018769 | THBS2    | 10.4 | 1.34E-122 | 0.120 | 4   | 21.8  | Q2 |
| IPI00017726 | HSD17B10 | 57.9 | <1.0E-304 | 0.120 | 8   | 9.4   | Q2 |
| IPI00292140 | CASP3    | 11.9 | 8.72E-07  | 0.121 | 3   | 2.7   | Q2 |
| IPI00001568 | ATP6V1D  | 32.4 | 6.48E-70  | 0.121 | 3   | 8.1   | Q2 |
| IPI00004397 | RALB     | 24.1 | 2.37E-32  | 0.122 | 4   | 8.4   | Q2 |
| IPI00218918 | ANXA1    | 77.2 | <1.0E-304 | 0.122 | 88  | 56.3  | Q2 |
| IPI00418471 | VIM      | 92.9 | <1.0E-304 | 0.123 | 473 | 96.2  | Q2 |
| IPI00513853 | STX12    | 21.4 | 8.49E-94  | 0.124 | 2   | 10.2  | Q2 |
| IPI00007752 | TUBB2C   | 15.5 | <1.0E-304 | 0.124 | 12  | 71.5  | Q2 |

|             |          |      |           |       |     |      |    |
|-------------|----------|------|-----------|-------|-----|------|----|
| IPI00008599 | EBP      | 16.5 | 1.66E-13  | 0.124 | 2   | 1.2  | Q2 |
| IPI00298111 | SNX6     | 31.1 | 6.07E-81  | 0.125 | 10  | 7.2  | Q2 |
| IPI00073958 | CNRIP1   | 39.6 | 6.54E-38  | 0.125 | 4   | 18.1 | Q2 |
| IPI00554705 | DCTD     | 39.2 | 2.03E-81  | 0.126 | 6   | 11.2 | Q2 |
| IPI00397860 | CYB5A    | 33.6 | 8.26E-97  | 0.126 | 2   | 43.0 | Q2 |
| IPI00220834 | XRCC5    | 58.7 | <1.0E-304 | 0.126 | 40  | 14.0 | Q2 |
| IPI00028296 | CAMK1    | 4.9  | 1.87E-04  | 0.128 | 3   | 84.1 | Q2 |
| IPI00016346 | PROSC    | 37.5 | 5.51E-75  | 0.129 | 6   | 17.3 | Q2 |
| IPI00012345 | SFRS6    | 18.3 | 8.42E-09  | 0.130 | 13  | 28.8 | Q2 |
| IPI00465179 | PFKM     | 13.2 | 1.08E-179 | 0.131 | 7   | 11.7 | Q2 |
| IPI00478231 | RHOA     | 59.6 | 2.14E-272 | 0.131 | 35  | 21.0 | Q2 |
| IPI00178431 | RECQL    | 18.6 | 4.80E-80  | 0.132 | 7   | 16.3 | Q2 |
| IPI00847322 | SOD2     | 43.2 | 2.34E-186 | 0.132 | 18  | 11.9 | Q2 |
| IPI00396967 | FHL2     | 35.7 | 2.75E-134 | 0.132 | 16  | 12.8 | Q2 |
| IPI00029629 | TRIM25   | 29   | 1.90E-219 | 0.133 | 16  | 6.9  | Q2 |
| IPI00473047 | PRKAG1   | 19.7 | 1.16E-215 | 0.133 | 6   | 19.0 | Q2 |
| IPI00014376 | RAB31    | 25.1 | 2.16E-47  | 0.134 | 4   | 20.8 | Q2 |
| IPI00289499 | ATIC     | 70.1 | <1.0E-304 | 0.134 | 28  | 10.9 | Q2 |
| IPI00024920 | ATP5D    | 17.3 | 1.27E-62  | 0.135 | 3   | 25.4 | Q2 |
| IPI00017283 | IARS2    | 27.4 | 1.11E-143 | 0.135 | 16  | 13.2 | Q2 |
| IPI00915855 | VDAC2    | 42.5 | 1.33E-177 | 0.136 | 17  | 87.5 | Q2 |
| IPI00026111 | TMCO1    | 12.2 | 1.52E-38  | 0.138 | 2   | 25.1 | Q2 |
| IPI00021057 | SLC12A4  | 7.9  | 8.01E-12  | 0.138 | 5   | 37.7 | Q2 |
| IPI00453473 | HIST1H4A | 53.4 | 1.29E-131 | 0.138 | 41  | 21.3 | Q2 |
| IPI00056357 | C19orf10 | 27.2 | 3.02E-32  | 0.138 | 5   | 23.7 | Q2 |
| IPI00218342 | MTHFD1   | 53.6 | <1.0E-304 | 0.139 | 44  | 24.6 | Q2 |
| IPI00382470 | HSP90AA1 | 51.6 | <1.0E-304 | 0.139 | 105 | 45.0 | Q2 |
| IPI00018768 | TSN      | 37.7 | 1.78E-24  | 0.140 | 6   | 9.0  | Q2 |
| IPI00221088 | RPS9     | 66   | 3.65E-38  | 0.141 | 26  | 20.6 | Q2 |
| IPI00021405 | LMNA     | 82.1 | <1.0E-304 | 0.141 | 224 | 81.2 | Q2 |
| IPI00021389 | CCS      | 20.4 | 5.93E-31  | 0.142 | 2   | 25.6 | Q2 |
| IPI00009943 | TPT1     | 76.6 | 1.99E-117 | 0.142 | 14  | 15.9 | Q2 |
| IPI00872762 | SUCLG1   | 22.3 | 1.63E-49  | 0.142 | 4   | 9.2  | Q2 |



|             |         |      |           |       |     |      |    |
|-------------|---------|------|-----------|-------|-----|------|----|
| IPI00014898 | PLEC1   | 69.8 | <1.0E-304 | 0.142 | 738 | 85.0 | Q2 |
| IPI00014898 | PLEC1   | 69.8 | <1.0E-304 | 0.142 | 738 | 85.0 | Q2 |
| IPI00646689 | TXNDC17 | 15.4 | 2.01E-03  | 0.144 | 3   | 7.1  | Q2 |
| IPI00029744 | SSBP1   | 57.4 | 1.79E-170 | 0.144 | 6   | 10.2 | Q2 |
| IPI00005537 | MRPL12  | 28.8 | 2.88E-34  | 0.145 | 3   | 10.9 | Q2 |
| IPI00293026 | EFTUD1  | 9.2  | 2.41E-50  | 0.145 | 5   | 18.3 | Q2 |
| IPI00844076 | RPN2    | 47.7 | <1.0E-304 | 0.146 | 36  | 28.0 | Q2 |
| IPI00299155 | PSMA4   | 55.6 | 2.10E-100 | 0.146 | 12  | 14.8 | Q2 |
| IPI00289758 | CAPN2   | 60.9 | <1.0E-304 | 0.147 | 45  | 25.5 | Q2 |
| IPI00014219 | SNX17   | 11.7 | 1.05E-31  | 0.147 | 3   | 26.0 | Q2 |
| IPI00917081 | ANO6    | 6.6  | 2.71E-38  | 0.147 | 2   | 25.9 | Q2 |
| IPI00075080 | OSBPL1A | 4.9  | 3.14E-06  | 0.148 | 2   | 8.2  | Q2 |
| IPI00013122 | CDC37   | 34.7 | 3.68E-216 | 0.148 | 5   | 7.1  | Q2 |
| IPI00793375 | XPNPEP1 | 20   | 8.57E-144 | 0.149 | 11  | 18.0 | Q2 |
| IPI00902482 | IDUA    | 1.3  | 2.56E-02  | 0.149 | 2   | 11.6 | Q2 |
| IPI00429191 | ETF1    | 28.4 | 5.03E-93  | 0.150 | 11  | 6.8  | Q2 |
| IPI00329742 | FAHD2A  | 14   | 1.32E-51  | 0.150 | 2   | 27.0 | Q2 |
| IPI00914624 | HLA-C   | 22.6 | 1.55E-44  | 0.150 | 3   | 19.1 | Q2 |
| IPI00025239 | NDUFS2  | 11.2 | 6.46E-23  | 0.150 | 5   | 9.3  | Q2 |
| IPI00329696 | FAM82B  | 24.2 | 3.48E-23  | 0.150 | 3   | 9.6  | Q2 |
| IPI00790503 | MYH10   | 45.9 | <1.0E-304 | 0.151 | 93  | 48.3 | Q2 |
| IPI00291419 | ACAT2   | 38   | 6.30E-189 | 0.152 | 9   | 8.3  | Q2 |
| IPI00219675 | RAC1    | 41.2 | 2.05E-73  | 0.152 | 15  | 9.5  | Q2 |
| IPI00140420 | SND1    | 60.9 | <1.0E-304 | 0.152 | 54  | 18.7 | Q2 |
| IPI00215888 | SRP72   | 32.5 | 4.16E-183 | 0.153 | 11  | 20.6 | Q2 |
| IPI00465308 | PIGS    | 10.6 | 3.39E-183 | 0.154 | 4   | 12.9 | Q2 |
| IPI00043598 | IKIP    | 26   | 6.84E-123 | 0.154 | 9   | 8.4  | Q2 |
| IPI00032459 | AP3M1   | 20.3 | 2.84E-118 | 0.154 | 7   | 7.8  | Q2 |
| IPI00032038 | CPT1A   | 21.9 | 2.64E-119 | 0.155 | 8   | 9.0  | Q2 |
| IPI00784154 | HSPD1   | 72.3 | <1.0E-304 | 0.155 | 70  | 45.2 | Q2 |
| IPI00168262 | GLT25D1 | 25.7 | 1.46E-168 | 0.156 | 13  | 41.0 | Q2 |
| IPI00004902 | ETFB    | 40.8 | 2.44E-98  | 0.156 | 14  | 21.7 | Q2 |
| IPI00216057 | SORD    | 22.1 | 7.60E-103 | 0.157 | 3   | 23.6 | Q2 |

|             |                |      |           |       |    |      |    |
|-------------|----------------|------|-----------|-------|----|------|----|
| IPI00647185 | CEP170         | 5.3  | 1.03E-20  | 0.157 | 4  | 27.9 | Q2 |
| IPI00413961 | DKFZp666O0110  | 4.7  | 4.84E-23  | 0.157 | 4  | 13.2 | Q2 |
| IPI00005160 | ARPC1B         | 43.8 | 1.04E-154 | 0.157 | 16 | 29.3 | Q2 |
| IPI00030770 | PSMG1          | 12.5 | 3.70E-29  | 0.157 | 2  | 31.2 | Q2 |
| IPI00023598 | TUBB4          | 9.7  | <1.0E-304 | 0.158 | 4  | 16.0 | Q2 |
| IPI00413451 | DKFZp686I04222 | 61.6 | <1.0E-304 | 0.158 | 22 | 30.1 | Q2 |
| IPI00908639 | HISPPD1        | 2.5  | 1.08E-03  | 0.158 | 3  | 4.5  | Q2 |
| IPI00295992 | ATAD3A         | 32.1 | 5.62E-143 | 0.158 | 9  | 13.5 | Q2 |
| IPI00020672 | DPP3           | 40.4 | <1.0E-304 | 0.159 | 21 | 6.2  | Q2 |
| IPI00296534 | FBLN1          | 18.2 | 2.50E-34  | 0.159 | 5  | 19.2 | Q2 |
| IPI00019400 | TPMT           | 9.8  | 2.30E-04  | 0.160 | 3  | 5.2  | Q2 |
| IPI00006504 | EIF2B3         | 4    | 2.30E-02  | 0.161 | 2  | 9.8  | Q2 |
| IPI00913912 | ATXN10         | 20.3 | 9.32E-69  | 0.161 | 4  | 48.6 | Q2 |
| IPI00007058 | CORO1B         | 24.1 | 1.53E-93  | 0.161 | 13 | 50.7 | Q2 |
| IPI00292657 | PTGR1          | 40.4 | 5.81E-83  | 0.161 | 11 | 15.2 | Q2 |
| IPI00015897 | CHORDC1        | 9    | 8.53E-17  | 0.161 | 3  | 16.1 | Q2 |
| IPI00025974 | CHMP4B         | 30.4 | 5.13E-100 | 0.161 | 4  | 19.9 | Q2 |
| IPI00028005 | NUP107         | 6.5  | 1.21E-33  | 0.162 | 5  | 68.3 | Q2 |
| IPI00873459 | 10-Sep         | 5.1  | 7.15E-15  | 0.162 | 2  | 17.0 | Q2 |
| IPI00890743 | PPP6C          | 8.2  | 5.32E-12  | 0.163 | 2  | 1.5  | Q2 |
| IPI00027252 | PHB2           | 62.5 | <1.0E-304 | 0.163 | 26 | 25.1 | Q2 |
| IPI00022892 | THY1           | 24.8 | 1.99E-103 | 0.164 | 11 | 37.2 | Q2 |
| IPI00023530 | CDK5           | 15.4 | 6.77E-05  | 0.165 | 3  | 23.4 | Q2 |
| IPI00018931 | VPS35          | 45.6 | <1.0E-304 | 0.165 | 41 | 31.9 | Q2 |
| IPI00017344 | RAB5B          | 33   | 5.94E-130 | 0.165 | 4  | 45.2 | Q2 |
| IPI00375676 | FTL            | 35.6 | 1.27E-122 | 0.166 | 4  | 17.8 | Q2 |
| IPI00479018 | SDCBP          | 5.3  | <1.0E-304 | 0.166 | 2  | 0.0  | Q2 |
| IPI00171573 | CCDC109A       | 10   | 1.96E-13  | 0.166 | 4  | 22.3 | Q2 |
| IPI00306719 | CHID1          | 12.1 | 4.39E-70  | 0.167 | 4  | 8.3  | Q2 |
| IPI00014587 | CLTA           | 29.4 | 1.90E-122 | 0.167 | 10 | 15.0 | Q2 |
| IPI00642984 | BCAP31         | 22.4 | 1.20E-61  | 0.168 | 8  | 7.8  | Q2 |
| IPI00027350 | PRDX2          | 36.9 | 1.32E-110 | 0.169 | 18 | 10.6 | Q2 |
| IPI00020986 | LUM            | 30.2 | 4.31E-107 | 0.169 | 2  | 7.2  | Q2 |

|             |          |      |           |       |     |      |    |
|-------------|----------|------|-----------|-------|-----|------|----|
| IPI00024320 | RBM3     | 45.9 | 1.73E-80  | 0.169 | 4   | 31.1 | Q2 |
| IPI00003865 | HSPA8    | 57   | <1.0E-304 | 0.170 | 102 | 51.3 | Q2 |
| IPI00305166 | SDHA     | 7.8  | 5.08E-278 | 0.170 | 2   | 13.6 | Q2 |
| IPI00005969 | CAPZA1   | 49   | 2.14E-141 | 0.171 | 8   | 7.9  | Q2 |
| IPI00012007 | AHCY     | 42.6 | 6.29E-191 | 0.172 | 11  | 9.7  | Q2 |
| IPI00003377 | SFRS7    | 19.3 | 1.10E-52  | 0.173 | 4   | 20.3 | Q2 |
| IPI00021129 | AP3B1    | 28.9 | 6.02E-137 | 0.173 | 25  | 24.5 | Q2 |
| IPI00303318 | FAM49B   | 13.3 | 5.93E-52  | 0.173 | 2   | 11.1 | Q2 |
| IPI00003918 | RPL4     | 46.6 | 1.77E-299 | 0.174 | 30  | 39.9 | Q2 |
| IPI00023728 | GGH      | 11.3 | 6.71E-22  | 0.174 | 2   | 7.4  | Q2 |
| IPI00026546 | PAFAH1B2 | 27.1 | 7.37E-92  | 0.174 | 5   | 13.8 | Q2 |
| IPI00003269 | ACTBL2   | 4.8  | 4.52E-128 | 0.175 | 13  | 53.0 | Q2 |
| IPI00157734 | EXOC3    | 19.6 | 6.54E-102 | 0.175 | 8   | 9.1  | Q2 |
| IPI00396485 | EEF1A1   | 61.5 | <1.0E-304 | 0.175 | 121 | 67.9 | Q2 |
| IPI00916757 | DCTN1    | 37.6 | <1.0E-304 | 0.176 | 34  | 21.7 | Q2 |
| IPI00021831 | PRKAR1A  | 31.8 | 9.55E-146 | 0.176 | 8   | 14.3 | Q2 |
| IPI00293434 | SRP14    | 37.5 | 1.02E-50  | 0.176 | 4   | 14.0 | Q2 |
| IPI00303882 | M6PRBP1  | 68   | <1.0E-304 | 0.176 | 37  | 9.9  | Q2 |
| IPI00012989 | MAN2B1   | 7.4  | 1.46E-175 | 0.177 | 5   | 11.4 | Q2 |
| IPI00219219 | LGALS1   | 95.6 | 1.08E-303 | 0.177 | 76  | 15.1 | Q2 |
| IPI00001437 | RND3     | 20.9 | 2.43E-17  | 0.177 | 3   | 2.7  | Q2 |
| IPI00411706 | ESD      | 39   | 4.15E-121 | 0.177 | 9   | 16.3 | Q2 |
| IPI00029054 | NT5C2    | 19.8 | 5.25E-57  | 0.178 | 4   | 6.9  | Q2 |
| IPI00010317 | RRAGB    | 10.7 | 1.71E-25  | 0.178 | 4   | 4.7  | Q2 |
| IPI00024990 | ALDH6A1  | 5.4  | 1.30E-12  | 0.179 | 2   | 11.3 | Q2 |
| IPI00012866 | AKT1     | 10.6 | 1.78E-11  | 0.180 | 2   | 7.8  | Q2 |
| IPI00010896 | CLIC1    | 68.5 | 2.86E-304 | 0.180 | 15  | 15.1 | Q2 |
| IPI00550234 | ARPC5    | 58.3 | 2.38E-44  | 0.180 | 7   | 7.7  | Q2 |
| IPI00008418 | DIABLO   | 9.8  | 2.09E-15  | 0.181 | 2   | 1.7  | Q2 |
| IPI00299024 | BASP1    | 70.9 | <1.0E-304 | 0.181 | 11  | 22.9 | Q2 |
| IPI00654569 | CAMK2D   | 23.3 | 1.26E-137 | 0.181 | 10  | 58.7 | Q2 |
| IPI00019376 | SEPT11   | 39.9 | 1.12E-202 | 0.182 | 26  | 36.8 | Q2 |
| IPI00911039 | HSPA1A   | 1.5  | <1.0E-304 | 0.182 | 2   | 14.2 | Q2 |

|             |          |      |           |       |     |      |    |
|-------------|----------|------|-----------|-------|-----|------|----|
| IPI00026230 | HNRNPH2  | 10.9 | 8.14E-242 | 0.182 | 5   | 5.2  | Q2 |
| IPI00005161 | ARPC2    | 61.7 | 7.13E-141 | 0.182 | 25  | 12.4 | Q2 |
| IPI00219077 | LTA4H    | 46.3 | 3.03E-285 | 0.183 | 19  | 7.2  | Q2 |
| IPI00413641 | AKR1B1   | 27.8 | 2.38E-35  | 0.184 | 12  | 12.2 | Q2 |
| IPI00328415 | CYB5R3   | 58.4 | <1.0E-304 | 0.184 | 32  | 17.5 | Q2 |
| IPI00795979 | FLOT2    | 25.9 | 3.44E-80  | 0.184 | 5   | 9.7  | Q2 |
| IPI00301618 | SDCCAG1  | 8.5  | 4.31E-19  | 0.185 | 3   | 17.5 | Q2 |
| IPI00927647 | POR      | 30.9 | 1.04E-244 | 0.185 | 15  | 29.5 | Q2 |
| IPI00216046 | SMARCA1  | 6.8  | 1.37E-74  | 0.186 | 3   | 0.1  | Q2 |
| IPI00871870 | ARPC3    | 63.5 | 8.25E-123 | 0.187 | 14  | 15.5 | Q2 |
| IPI00414384 | HSDL2    | 19.4 | 7.23E-111 | 0.187 | 4   | 16.5 | Q2 |
| IPI00419273 | CUL4A    | 8.8  | 1.07E-69  | 0.188 | 7   | 9.4  | Q2 |
| IPI00014151 | PSMD6    | 43.2 | 8.64E-86  | 0.188 | 9   | 15.0 | Q2 |
| IPI00025329 | RPL19    | 27   | 1.15E-132 | 0.188 | 5   | 98.9 | Q2 |
| IPI00073179 | VPS33A   | 7.9  | 3.23E-09  | 0.188 | 2   | 9.7  | Q2 |
| IPI00339384 | RDH11    | 20.8 | 2.24E-59  | 0.189 | 4   | 23.3 | Q2 |
| IPI00180404 | NEXN     | 23.7 | 5.55E-60  | 0.189 | 18  | 15.5 | Q2 |
| IPI00020530 | ACOT13   | 25   | 2.41E-39  | 0.189 | 2   | 2.2  | Q2 |
| IPI00550069 | RNH1     | 70.7 | <1.0E-304 | 0.190 | 43  | 46.8 | Q2 |
| IPI00844159 | PGM1     | 59.1 | <1.0E-304 | 0.190 | 14  | 6.3  | Q2 |
| IPI00020124 | PI4K2A   | 7.3  | 9.02E-10  | 0.190 | 2   | 4.0  | Q2 |
| IPI00032406 | DNAJA2   | 17   | 3.80E-23  | 0.190 | 3   | 9.2  | Q2 |
| IPI00465123 | KIAA0415 | 3.8  | 8.31E-06  | 0.191 | 4   | 60.6 | Q2 |
| IPI00031522 | HADHA    | 60.2 | <1.0E-304 | 0.192 | 46  | 19.4 | Q2 |
| IPI00337386 | PRPF40A  | 8.6  | 5.49E-68  | 0.193 | 8   | 5.3  | Q2 |
| IPI00916111 | MDH1     | 37.8 | 3.33E-254 | 0.193 | 17  | 11.1 | Q2 |
| IPI00027780 | MMP2     | 17.7 | 7.88E-76  | 0.193 | 7   | 28.2 | Q2 |
| IPI00029468 | ACTR1A   | 48.1 | <1.0E-304 | 0.193 | 13  | 9.4  | Q2 |
| IPI00409717 | EIF4A2   | 12.7 | 2.42E-282 | 0.194 | 2   | 2.2  | Q2 |
| IPI00011654 | TUBB     | 74.3 | <1.0E-304 | 0.196 | 187 | 78.8 | Q2 |
| IPI00002535 | FKBP2    | 47.2 | 6.12E-94  | 0.197 | 2   | 3.7  | Q2 |
| IPI00871854 | SAMM50   | 15.6 | 4.25E-17  | 0.197 | 4   | 5.0  | Q2 |
| IPI00307200 | SWAP70   | 29.2 | 3.14E-61  | 0.197 | 12  | 45.9 | Q2 |

|             |          |      |           |       |     |       |    |
|-------------|----------|------|-----------|-------|-----|-------|----|
| IPI00008552 | GLRX3    | 40.6 | 1.12E-116 | 0.198 | 9   | 7.5   | Q2 |
| IPI00783656 | MRPL38   | 4.7  | 2.83E-02  | 0.199 | 2   | 40.3  | Q2 |
| IPI00872103 | ASL      | 8.3  | 7.10E-112 | 0.200 | 3   | 7.9   | Q2 |
| IPI00298994 | TLN1     | 69.1 | <1.0E-304 | 0.200 | 367 | 79.4  | Q2 |
| IPI00018364 | RAP2B    | 49.7 | 2.01E-85  | 0.201 | 7   | 4.6   | Q2 |
| IPI00030783 | STAT5A   | 4.9  | 1.97E-19  | 0.202 | 4   | 16.5  | Q2 |
| IPI00018195 | MAPK3    | 24.5 | 1.40E-119 | 0.202 | 6   | 9.7   | Q2 |
| IPI00166865 | CISD2    | 46.7 | 1.20E-55  | 0.203 | 4   | 18.5  | Q2 |
| IPI00024919 | PRDX3    | 43.8 | 3.48E-155 | 0.203 | 14  | 19.2  | Q2 |
| IPI00028888 | HNRNPD   | 39.7 | <1.0E-304 | 0.203 | 28  | 68.5  | Q2 |
| IPI00024913 | C21orf33 | 31   | 1.35E-40  | 0.203 | 4   | 17.2  | Q2 |
| IPI00095891 | GNAS     | 8.5  | 3.95E-32  | 0.203 | 8   | 8.7   | Q2 |
| IPI00013981 | YES1     | 6.8  | 5.67E-18  | 0.203 | 5   | 39.3  | Q2 |
| IPI00641990 | LAS1L    | 15.1 | 4.11E-110 | 0.204 | 2   | 13.3  | Q2 |
| IPI00024993 | ECHS1    | 49.7 | 4.17E-299 | 0.204 | 10  | 67.0  | Q2 |
| IPI00103373 | CYGB     | 4.7  | 1.75E-03  | 0.204 | 2   | 15.4  | Q2 |
| IPI00031420 | UGDH     | 62.3 | <1.0E-304 | 0.204 | 25  | 25.3  | Q2 |
| IPI00412987 | GMFB     | 49.4 | 1.99E-202 | 0.205 | 5   | 8.9   | Q2 |
| IPI00246975 | GSTM3    | 55.1 | 9.14E-141 | 0.205 | 9   | 17.7  | Q2 |
| IPI00011107 | IDH2     | 35.4 | 1.06E-106 | 0.207 | 16  | 12.8  | Q2 |
| IPI00185037 | MARK1    | 2    | 1.67E-03  | 0.208 | 2   | 10.7  | Q2 |
| IPI00304612 | RPL13A   | 44.3 | 8.73E-61  | 0.209 | 11  | 36.9  | Q2 |
| IPI00329791 | DDX46    | 16.9 | 1.51E-95  | 0.210 | 12  | 16.1  | Q2 |
| IPI00185146 | IPO9     | 26.5 | <1.0E-304 | 0.210 | 21  | 30.3  | Q2 |
| IPI00291669 | UBLCP1   | 16.7 | 9.72E-22  | 0.210 | 6   | 8.0   | Q2 |
| IPI00296157 | RETSAT   | 8.2  | 1.73E-26  | 0.211 | 2   | 18.8  | Q2 |
| IPI00219677 | DERA     | 13.2 | 5.62E-25  | 0.211 | 3   | 2.0   | Q2 |
| IPI00177728 | CNDP2    | 54.7 | 1.08E-161 | 0.211 | 10  | 7.1   | Q2 |
| IPI00011285 | CAPN1    | 49.2 | <1.0E-304 | 0.212 | 38  | 9.8   | Q2 |
| IPI00291136 | COL6A1   | 40.1 | <1.0E-304 | 0.212 | 75  | 116.8 | Q2 |
| IPI00414289 | GPS1     | 15.6 | 1.95E-18  | 0.213 | 2   | 5.4   | Q2 |
| IPI00216308 | VDAC1    | 71   | 6.49E-221 | 0.213 | 23  | 49.4  | Q2 |
| IPI00220373 | IDE      | 14.1 | 1.40E-72  | 0.214 | 8   | 6.5   | Q2 |

|             |          |      |           |       |    |      |    |
|-------------|----------|------|-----------|-------|----|------|----|
| IPI00414554 | ARPC5L   | 28.8 | 4.68E-52  | 0.215 | 3  | 16.2 | Q2 |
| IPI00647915 | TAGLN2   | 80.5 | <1.0E-304 | 0.215 | 45 | 14.8 | Q2 |
| IPI00218187 | PPP1CC   | 7.1  | <1.0E-304 | 0.215 | 3  | 11.3 | Q2 |
| IPI00657888 | GMPPA    | 18.4 | 2.35E-148 | 0.215 | 4  | 29.5 | Q2 |
| IPI00010810 | ETFA     | 48   | <1.0E-304 | 0.216 | 12 | 5.7  | Q2 |
| IPI00022793 | HADHB    | 42.4 | 2.61E-137 | 0.216 | 16 | 6.8  | Q2 |
| IPI00000792 | CRYZ     | 18.8 | 1.38E-19  | 0.217 | 5  | 8.0  | Q2 |
| IPI00010706 | GSS      | 24.5 | 3.58E-23  | 0.218 | 9  | 10.2 | Q2 |
| IPI00143921 | KDEL2    | 31.8 | 8.58E-177 | 0.218 | 8  | 9.2  | Q2 |
| IPI00303476 | ATP5B    | 69.6 | <1.0E-304 | 0.218 | 67 | 76.9 | Q2 |
| IPI00260090 | ELMO2    | 22.3 | 1.75E-141 | 0.219 | 6  | 11.9 | Q2 |
| IPI00018274 | EGFR     | 18.5 | 1.38E-94  | 0.219 | 12 | 22.5 | Q2 |
| IPI00002134 | PSMD5    | 36.3 | <1.0E-304 | 0.220 | 15 | 9.9  | Q2 |
| IPI00027497 | GPI      | 43.7 | <1.0E-304 | 0.221 | 24 | 30.7 | Q2 |
| IPI00220687 | HM13     | 6.8  | 2.33E-23  | 0.221 | 4  | 13.7 | Q2 |
| IPI00783559 | EXOC2    | 14.9 | 3.80E-100 | 0.222 | 8  | 25.8 | Q2 |
| IPI00215920 | ARF6     | 30.3 | 7.67E-51  | 0.222 | 2  | 3.7  | Q2 |
| IPI00796919 | GLB1     | 22.5 | 3.73E-190 | 0.223 | 17 | 15.7 | Q2 |
| IPI00016670 | C11orf59 | 50.3 | 9.17E-88  | 0.224 | 6  | 15.1 | Q2 |
| IPI00410091 | C11orf73 | 8.1  | 1.46E-02  | 0.225 | 2  | 23.5 | Q2 |
| IPI00910322 | TPM4     | 33.1 | <1.0E-304 | 0.226 | 11 | 78.3 | Q2 |
| IPI00021807 | GBA      | 30.4 | 4.20E-201 | 0.226 | 16 | 23.2 | Q2 |
| IPI00019912 | HSD17B4  | 55.2 | <1.0E-304 | 0.227 | 38 | 26.8 | Q2 |
| IPI00023591 | PURA     | 24.2 | 1.66E-171 | 0.230 | 5  | 14.9 | Q2 |
| IPI00009253 | NAPA     | 54.2 | 4.36E-261 | 0.230 | 9  | 20.2 | Q2 |
| IPI00013466 | ASNA1    | 33.3 | 1.51E-160 | 0.230 | 7  | 20.3 | Q2 |
| IPI00004416 | CHMP2A   | 18.9 | 1.28E-05  | 0.230 | 4  | 7.2  | Q2 |
| IPI00219840 | AP2S1    | 16.9 | 7.32E-04  | 0.232 | 3  | 2.0  | Q2 |
| IPI00009368 | SFXN1    | 30.1 | 3.38E-49  | 0.232 | 2  | 25.1 | Q2 |
| IPI00301489 | UROD     | 25.1 | 5.28E-37  | 0.233 | 5  | 5.6  | Q2 |
| IPI00017303 | MSH2     | 4.6  | 1.14E-18  | 0.233 | 2  | 19.5 | Q2 |
| IPI00009329 | UTRN     | 25.1 | <1.0E-304 | 0.235 | 54 | 23.9 | Q2 |
| IPI00003925 | PDHB     | 42.1 | 3.21E-225 | 0.235 | 14 | 64.7 | Q2 |

|             |          |      |           |       |     |      |    |
|-------------|----------|------|-----------|-------|-----|------|----|
| IPI00216088 | CRABP2   | 56.5 | 8.13E-54  | 0.238 | 10  | 8.9  | Q2 |
| IPI00294501 | DHCR7    | 13.1 | 3.49E-192 | 0.241 | 4   | 5.0  | Q2 |
| IPI00444945 | BAX      | 43.6 | 6.31E-144 | 0.242 | 3   | 15.4 | Q2 |
| IPI00657692 | COL4A3BP | 6.2  | 5.27E-23  | 0.243 | 2   | 6.7  | Q2 |
| IPI00012303 | SELENBP1 | 25.5 | 2.44E-110 | 0.243 | 4   | 10.3 | Q2 |
| IPI00027438 | FLOT1    | 29   | 2.84E-246 | 0.245 | 7   | 6.0  | Q2 |
| IPI00024364 | TNPO1    | 24.4 | 1.18E-156 | 0.246 | 29  | 36.5 | Q2 |
| IPI00336016 | CARS2    | 10.3 | 6.13E-20  | 0.246 | 2   | 1.1  | Q2 |
| IPI00873226 | hTGP     | 1.3  | 2.86E-03  | 0.246 | 4   | 13.2 | Q2 |
| IPI00003004 | SLC25A22 | 8.7  | 1.95E-57  | 0.247 | 2   | 11.8 | Q2 |
| IPI00023987 | PPCS     | 24.1 | 6.44E-34  | 0.248 | 3   | 4.7  | Q2 |
| IPI00295209 | SNX5     | 19.6 | 2.08E-33  | 0.249 | 4   | 28.7 | Q2 |
| IPI00022977 | CKB      | 21.5 | 3.74E-132 | 0.249 | 3   | 6.4  | Q2 |
| IPI00852806 | EXOC6B   | 8.8  | 1.32E-53  | 0.250 | 5   | 25.4 | Q2 |
| IPI00914566 | FDPS     | 16.2 | 1.33E-20  | 0.250 | 5   | 4.5  | Q2 |
| IPI00180675 | TUBA1A   | 61.6 | <1.0E-304 | 0.250 | 154 | 76.5 | Q2 |
| IPI00007001 | MRPL11   | 24.5 | 1.42E-16  | 0.251 | 3   | 9.7  | Q2 |
| IPI00100160 | CAND1    | 41.8 | <1.0E-304 | 0.251 | 69  | 48.1 | Q2 |
| IPI00009456 | NT5E     | 47.7 | <1.0E-304 | 0.251 | 16  | 9.4  | Q2 |
| IPI00647082 | TBC1D13  | 2.5  | 1.08E-02  | 0.253 | 2   | 4.7  | Q2 |
| IPI00440493 | ATP5A1   | 64   | <1.0E-304 | 0.253 | 52  | 98.4 | Q2 |
| IPI00026942 | ERLIN2   | 45.7 | 2.17E-287 | 0.253 | 12  | 9.5  | Q2 |
| IPI00470674 | CYB5R1   | 28.9 | 1.55E-31  | 0.255 | 5   | 21.0 | Q2 |
| IPI00220873 | PAPSS2   | 36.5 | 8.74E-298 | 0.255 | 12  | 6.5  | Q2 |
| IPI00022275 | SACM1L   | 15.3 | 1.60E-29  | 0.255 | 3   | 5.5  | Q2 |
| IPI00013475 | TUBB2A   | 20.9 | <1.0E-304 | 0.255 | 16  | 47.2 | Q2 |
| IPI00916503 | BZW1     | 30.6 | 1.07E-56  | 0.256 | 15  | 45.5 | Q2 |
| IPI00093057 | CPOX     | 7.3  | 1.81E-21  | 0.257 | 4   | 7.3  | Q2 |
| IPI00024670 | REEP5    | 20.6 | 1.54E-40  | 0.257 | 6   | 19.8 | Q2 |
| IPI00306301 | PDHA1    | 19.6 | 7.03E-46  | 0.257 | 7   | 6.7  | Q2 |
| IPI00007426 | ARL6IP5  | 28.2 | 1.36E-60  | 0.257 | 17  | 31.3 | Q2 |
| IPI00215719 | RPL18    | 45.7 | 8.07E-78  | 0.257 | 14  | 59.6 | Q2 |
| IPI00873294 | BLMH     | 6    | 1.97E-14  | 0.258 | 2   | 5.3  | Q2 |

|             |         |      |           |       |      |       |    |
|-------------|---------|------|-----------|-------|------|-------|----|
| IPI00304189 | OPTN    | 16.6 | 1.91E-58  | 0.259 | 6    | 20.8  | Q2 |
| IPI00007052 | FIS1    | 34.2 | 2.49E-160 | 0.262 | 7    | 15.8  | Q2 |
| IPI00013004 | PDXK    | 42   | 1.48E-267 | 0.262 | 7    | 8.7   | Q2 |
| IPI00029656 | DFNA5   | 12.5 | 1.15E-37  | 0.262 | 6    | 10.2  | Q2 |
| IPI00607861 | H6PD    | 30.2 | 1.47E-152 | 0.262 | 24   | 30.3  | Q2 |
| IPI00790342 | RPL6    | 49.1 | 1.89E-198 | 0.263 | 22   | 48.2  | Q2 |
| IPI00887678 | PPIA    | 55.6 | <1.0E-304 | 0.263 | 51   | 91.3  | Q2 |
| IPI00024915 | PRDX5   | 56.1 | 1.39E-294 | 0.264 | 18   | 16.6  | Q2 |
| IPI00029133 | ATP5F1  | 43.4 | 7.87E-148 | 0.265 | 11   | 5.3   | Q2 |
| IPI00029723 | FSTL1   | 12.7 | 4.42E-27  | 0.265 | 4    | 12.8  | Q2 |
| IPI00290279 | ADK     | 27.1 | 6.67E-75  | 0.266 | 9    | 8.5   | Q2 |
| IPI00299149 | SUMO2   | 23.2 | 1.87E-22  | 0.267 | 8    | 34.7  | Q2 |
| IPI00028564 | GBP1    | 23.1 | 9.18E-48  | 0.267 | 3    | 7.2   | Q2 |
| IPI00829927 | ARMC9   | 30.2 | 1.57E-227 | 0.267 | 12   | 68.1  | Q2 |
| IPI00465428 | VPS13C  | 4.6  | 7.09E-49  | 0.268 | 8    | 19.5  | Q2 |
| IPI00027014 | DCTN3   | 39.2 | 2.09E-18  | 0.268 | 11   | 106.3 | Q2 |
| IPI00217143 | SDHA    | 36.7 | 1.38E-285 | 0.268 | 14   | 11.4  | Q2 |
| IPI00021812 | AHNAK   | 78   | <1.0E-304 | 0.268 | 1005 | 95.0  | Q2 |
| IPI00639841 | PECI    | 7.6  | 9.56E-27  | 0.268 | 2    | 2.4   | Q2 |
| IPI00553067 | CCDC132 | 5.9  | 4.15E-69  | 0.269 | 3    | 13.7  | Q2 |
| IPI00005707 | MRC2    | 20.9 | <1.0E-304 | 0.270 | 21   | 44.9  | Q2 |
| IPI00299977 | PHPT1   | 63.2 | 2.07E-125 | 0.271 | 6    | 10.5  | Q2 |
| IPI00759776 | ACTN1   | 57.2 | <1.0E-304 | 0.274 | 121  | 47.1  | Q2 |
| IPI00015911 | DLD     | 21.4 | 6.24E-224 | 0.274 | 10   | 20.8  | Q2 |
| IPI00170972 | C9orf64 | 8.2  | 1.47E-05  | 0.274 | 2    | 3.6   | Q2 |
| IPI00009342 | IQGAP1  | 67.7 | <1.0E-304 | 0.275 | 164  | 64.6  | Q2 |
| IPI00748567 | LIPA    | 8.2  | 3.33E-15  | 0.276 | 3    | 38.0  | Q2 |
| IPI00480142 | CUL4B   | 29.2 | 2.76E-124 | 0.276 | 31   | 17.2  | Q2 |
| IPI00643920 | TKT     | 55   | <1.0E-304 | 0.278 | 69   | 72.1  | Q2 |
| IPI00014361 | TSTA3   | 24.3 | 9.02E-96  | 0.279 | 5    | 8.7   | Q2 |
| IPI00024775 | RAB7L1  | 10.8 | 1.55E-19  | 0.279 | 2    | 11.0  | Q2 |
| IPI00292771 | NUMA1   | 31.3 | <1.0E-304 | 0.279 | 38   | 24.0  | Q2 |
| IPI00291006 | MDH2    | 63.6 | <1.0E-304 | 0.282 | 33   | 18.4  | Q2 |



|             |          |      |           |       |     |      |    |
|-------------|----------|------|-----------|-------|-----|------|----|
| IPI00000684 | UAP1     | 20.9 | 6.10E-82  | 0.282 | 5   | 24.6 | Q2 |
| IPI00640817 | AK1      | 50   | 2.51E-147 | 0.283 | 17  | 19.3 | Q2 |
| IPI00646762 | NUDT5    | 53   | 1.00E-143 | 0.283 | 5   | 9.8  | Q2 |
| IPI00909772 | AP2M1    | 37.4 | 2.19E-69  | 0.284 | 19  | 44.2 | Q2 |
| IPI00025796 | NDUFS3   | 43.6 | 6.12E-182 | 0.284 | 5   | 14.5 | Q2 |
| IPI00642032 | TXNL1    | 23.1 | 1.71E-113 | 0.284 | 7   | 48.4 | Q2 |
| IPI00072044 | C11orf54 | 9.2  | 8.68E-14  | 0.285 | 3   | 9.7  | Q2 |
| IPI00107752 | OPA1     | 11.4 | 5.18E-50  | 0.287 | 8   | 13.9 | Q2 |
| IPI00028051 | VPS41    | 9.3  | 1.24E-69  | 0.287 | 6   | 18.1 | Q2 |
| IPI00018206 | GOT2     | 36.7 | 4.29E-209 | 0.287 | 14  | 13.5 | Q2 |
| IPI00640525 | PPGB     | 19.1 | 1.54E-91  | 0.288 | 12  | 27.5 | Q2 |
| IPI00305212 | COMMD9   | 22.7 | 1.44E-58  | 0.288 | 3   | 27.7 | Q2 |
| IPI00007611 | ATP5O    | 62.4 | 8.02E-236 | 0.289 | 11  | 14.7 | Q2 |
| IPI00014439 | QDPR     | 34.8 | 7.79E-82  | 0.289 | 2   | 22.3 | Q2 |
| IPI00477118 | TMEM214  | 27.6 | 7.19E-151 | 0.289 | 9   | 44.8 | Q2 |
| IPI00337541 | NNT      | 29   | <1.0E-304 | 0.292 | 21  | 9.5  | Q2 |
| IPI00019269 | WDR61    | 31.5 | 3.39E-104 | 0.293 | 3   | 13.1 | Q2 |
| IPI00024403 | CPNE3    | 25.7 | 7.78E-114 | 0.293 | 10  | 15.8 | Q2 |
| IPI00871815 | LNPEP    | 17.1 | 7.84E-111 | 0.294 | 12  | 45.2 | Q2 |
| IPI00033600 | PPP1R7   | 35.6 | 1.02E-161 | 0.294 | 10  | 19.0 | Q2 |
| IPI00419721 | EPM2AIP1 | 6.1  | 1.26E-12  | 0.295 | 2   | 26.1 | Q2 |
| IPI00329801 | ANXA5    | 80.3 | <1.0E-304 | 0.296 | 100 | 43.0 | Q2 |
| IPI00003833 | MTCH2    | 48.2 | 2.08E-214 | 0.297 | 7   | 14.8 | Q2 |
| IPI00411886 | NOC2L    | 9.3  | 5.66E-08  | 0.298 | 4   | 8.2  | Q2 |
| IPI00298406 | HADH     | 26.2 | 2.02E-132 | 0.299 | 11  | 6.7  | Q2 |
| IPI00217563 | ITGB1    | 26.1 | 9.04E-209 | 0.300 | 37  | 23.0 | Q2 |
| IPI00013808 | ACTN4    | 78.7 | <1.0E-304 | 0.301 | 217 | 59.2 | Q2 |
| IPI00294159 | SLC25A1  | 40.2 | 3.24E-52  | 0.302 | 9   | 9.2  | Q2 |
| IPI00221226 | ANXA6    | 81.7 | <1.0E-304 | 0.302 | 121 | 28.2 | Q2 |
| IPI00169285 | PLBD2    | 19.5 | 1.41E-49  | 0.305 | 12  | 8.6  | Q2 |
| IPI00021440 | ACTG1    | 79.5 | <1.0E-304 | 0.305 | 315 | 61.3 | Q2 |
| IPI00220342 | DDAH1    | 27.4 | 4.56E-26  | 0.305 | 4   | 3.1  | Q2 |
| IPI00873829 | ACAA2    | 28.7 | 2.96E-162 | 0.307 | 6   | 5.4  | Q2 |

|             |          |      |           |       |    |       |    |
|-------------|----------|------|-----------|-------|----|-------|----|
| IPI00024661 | SEC24C   | 19.3 | 3.26E-100 | 0.308 | 19 | 123.8 | Q2 |
| IPI00022348 | PML      | 11.7 | 1.54E-20  | 0.308 | 8  | 26.7  | Q2 |
| IPI00003438 | DNAJC8   | 28.9 | 9.40E-29  | 0.309 | 3  | 0.3   | Q2 |
| IPI00329719 | MYO1D    | 54.9 | <1.0E-304 | 0.309 | 55 | 77.8  | Q2 |
| IPI00291643 | SPRYD4   | 8.2  | 7.60E-04  | 0.310 | 3  | 1.3   | Q2 |
| IPI00549736 | ASCC2    | 6.9  | 1.04E-21  | 0.311 | 3  | 2.6   | Q2 |
| IPI00001580 | FYCO1    | 35.6 | <1.0E-304 | 0.311 | 34 | 67.7  | Q2 |
| IPI00291467 | SLC25A6  | 64.1 | 7.31E-173 | 0.311 | 33 | 72.2  | Q2 |
| IPI00220487 | ATP5H    | 63.4 | 1.88E-114 | 0.312 | 8  | 11.0  | Q2 |
| IPI00013912 | C1orf198 | 15.9 | 5.38E-17  | 0.315 | 3  | 1.1   | Q2 |
| IPI00031564 | GGCT     | 16.5 | 1.16E-12  | 0.318 | 3  | 32.5  | Q2 |
| IPI00025318 | SH3BGRL  | 56.1 | 5.58E-74  | 0.319 | 7  | 11.9  | Q2 |
| IPI00742968 | HLA-A    | 55.9 | <1.0E-304 | 0.321 | 20 | 47.1  | Q2 |
| IPI00220906 | ACOT2    | 23   | 9.13E-191 | 0.322 | 3  | 6.9   | Q2 |
| IPI00009507 | SYPL1    | 8.5  | 1.05E-20  | 0.323 | 2  | 27.9  | Q2 |
| IPI00016457 | CRAT     | 16   | 1.40E-37  | 0.324 | 3  | 13.3  | Q2 |
| IPI00300599 | CTSK     | 46.5 | <1.0E-304 | 0.324 | 17 | 17.6  | Q2 |
| IPI00889514 | HEATR7A  | 6.8  | 4.14E-55  | 0.324 | 6  | 17.1  | Q2 |
| IPI00412492 | PLXND1   | 2.3  | 1.21E-14  | 0.325 | 3  | 1.7   | Q2 |
| IPI00013508 | ACTN1    | 2.5  | <1.0E-304 | 0.325 | 2  | 1.9   | Q2 |
| IPI00748360 | KIAA1797 | 6.1  | 1.94E-26  | 0.328 | 9  | 18.4  | Q2 |
| IPI00005634 | TTC37    | 12.7 | 2.51E-177 | 0.328 | 10 | 14.2  | Q2 |
| IPI00642374 | UCHL5    | 11.1 | 6.56E-11  | 0.329 | 3  | 12.9  | Q2 |
| IPI00296053 | FH       | 37.6 | <1.0E-304 | 0.332 | 10 | 11.3  | Q2 |
| IPI00016801 | GLUD1    | 47   | 2.32E-290 | 0.333 | 21 | 22.3  | Q2 |
| IPI00798102 | VPS29    | 33.6 | 3.43E-38  | 0.335 | 4  | 3.5   | Q2 |
| IPI00217272 | AACS     | 7.6  | 1.16E-08  | 0.336 | 5  | 104.1 | Q2 |
| IPI00479877 | ALDH9A1  | 31.7 | 1.22E-154 | 0.337 | 9  | 7.3   | Q2 |
| IPI00872808 | DOCK1    | 6.3  | 2.33E-24  | 0.337 | 6  | 13.6  | Q2 |
| IPI00514587 | SARS     | 36.9 | 1.38E-154 | 0.339 | 13 | 10.1  | Q2 |
| IPI00019427 | EXOC1    | 8.6  | 4.57E-27  | 0.343 | 3  | 8.0   | Q2 |
| IPI00025366 | CS       | 39.1 | 3.20E-140 | 0.347 | 15 | 14.2  | Q2 |
| IPI00923582 | SCRN1    | 24.9 | 4.05E-120 | 0.348 | 8  | 11.3  | Q2 |

|             |           |      |           |       |     |      |    |
|-------------|-----------|------|-----------|-------|-----|------|----|
| IPI00152981 | ACAD9     | 31.2 | 7.42E-136 | 0.348 | 10  | 21.1 | Q2 |
| IPI00419250 | GSTT2     | 41.4 | 2.01E-76  | 0.350 | 3   | 11.4 | Q2 |
| IPI00215777 | SLC25A3   | 43.5 | 5.51E-213 | 0.350 | 12  | 10.9 | Q2 |
| IPI00790757 | DUSP3     | 38.1 | 1.17E-147 | 0.351 | 7   | 23.1 | Q2 |
| IPI00013976 | LAMB1     | 14.3 | 1.06E-183 | 0.352 | 16  | 24.4 | Q2 |
| IPI00027107 | TUFM      | 49.7 | 2.29E-167 | 0.352 | 16  | 38.7 | Q2 |
| IPI00760846 | MYO18A    | 4.6  | 2.28E-26  | 0.353 | 4   | 28.4 | Q2 |
| IPI00478834 | ARGLU1    | 10.6 | 1.52E-02  | 0.353 | 2   | 12.6 | Q2 |
| IPI00147874 | NANS      | 27.9 | 6.42E-59  | 0.354 | 6   | 8.6  | Q2 |
| IPI00011302 | CD59      | 25   | 4.12E-32  | 0.355 | 6   | 4.1  | Q2 |
| IPI00329536 | EEA1      | 60.2 | <1.0E-304 | 0.356 | 72  | 17.6 | Q2 |
| IPI00013290 | HDFGRP2   | 7.5  | 1.44E-55  | 0.359 | 5   | 19.9 | Q2 |
| IPI00871176 | NIPSNAP3A | 24   | 6.26E-25  | 0.360 | 2   | 16.5 | Q2 |
| IPI00012426 | SCPEP1    | 18.1 | 1.53E-38  | 0.361 | 6   | 20.6 | Q2 |
| IPI00031109 | NDUFAF2   | 20.1 | 4.65E-54  | 0.362 | 2   | 18.7 | Q2 |
| IPI00006971 | CD248     | 2.4  | 5.63E-04  | 0.362 | 4   | 45.2 | Q2 |
| IPI00003482 | DECR1     | 33.1 | 5.60E-145 | 0.363 | 10  | 14.9 | Q2 |
| IPI00008234 | CYB5R2    | 33   | 1.94E-17  | 0.365 | 2   | 4.2  | Q2 |
| IPI00383046 | CMBL      | 19.6 | 1.51E-09  | 0.365 | 6   | 29.8 | Q2 |
| IPI00744706 | SPTAN1    | 61.9 | <1.0E-304 | 0.366 | 167 | 48.5 | Q2 |
| IPI00005737 | SURF4     | 18.6 | 2.18E-148 | 0.368 | 12  | 67.5 | Q2 |
| IPI00016342 | RAB7A     | 83.1 | <1.0E-304 | 0.368 | 30  | 21.8 | Q2 |
| IPI00294779 | VDAC3     | 32   | 5.16E-74  | 0.368 | 5   | 14.9 | Q2 |
| IPI00744637 | RUFY1     | 19.9 | 6.87E-98  | 0.368 | 11  | 20.5 | Q2 |
| IPI00654820 | MT-ATP6   | 6.8  | 1.53E-07  | 0.369 | 2   | 5.1  | Q2 |
| IPI00221234 | ALDH7A1   | 41.6 | <1.0E-304 | 0.369 | 11  | 14.7 | Q2 |
| IPI00550364 | PGM2      | 13.6 | 2.66E-28  | 0.369 | 2   | 31.8 | Q2 |
| IPI00024067 | CLTC      | 69.2 | <1.0E-304 | 0.370 | 237 | 59.2 | Q2 |
| IPI00470529 | GPNMB     | 5.8  | 9.65E-109 | 0.370 | 16  | 58.3 | Q2 |
| IPI00337494 | SLC25A24  | 37.5 | 9.32E-172 | 0.371 | 8   | 8.1  | Q2 |
| IPI00419596 | MOXD1     | 3.9  | 1.02E-02  | 0.372 | 4   | 11.7 | Q2 |
| IPI00030702 | IDH3A     | 30.1 | 2.63E-98  | 0.373 | 7   | 9.6  | Q2 |
| IPI00856049 | RPL22L1   | 39.3 | 2.50E-28  | 0.373 | 2   | 4.3  | Q2 |

|             |          |      |           |       |    |       |    |
|-------------|----------|------|-----------|-------|----|-------|----|
| IPI00016862 | GSR      | 10.3 | 1.32E-25  | 0.373 | 3  | 4.1   | Q2 |
| IPI00075248 | CALM1    | 78.5 | <1.0E-304 | 0.376 | 9  | 14.4  | Q2 |
| IPI00173359 | UACA     | 16   | 2.65E-133 | 0.379 | 13 | 18.3  | Q2 |
| IPI00237884 | AKAP12   | 33.7 | <1.0E-304 | 0.381 | 55 | 68.6  | Q2 |
| IPI00012828 | ACAA1    | 15.3 | 2.02E-160 | 0.381 | 4  | 4.5   | Q2 |
| IPI00002745 | CTSZ     | 15.8 | 1.04E-49  | 0.383 | 4  | 7.6   | Q2 |
| IPI00739099 | COL5A2   | 1.3  | 1.07E-03  | 0.383 | 2  | 142.9 | Q2 |
| IPI00465059 | RHOT2    | 5.2  | 9.91E-26  | 0.390 | 2  | 12.7  | Q2 |
| IPI00002188 | ARFGEF1  | 3.6  | 3.98E-48  | 0.391 | 5  | 68.2  | Q2 |
| IPI00419237 | LAP3     | 40.7 | 4.38E-179 | 0.394 | 10 | 6.4   | Q2 |
| IPI00026215 | FEN1     | 13.2 | 3.66E-28  | 0.395 | 2  | 8.1   | Q2 |
| IPI00299086 | SDCBP    | 65.1 | <1.0E-304 | 0.398 | 26 | 18.8  | Q2 |
| IPI00216719 | ERC1     | 21.2 | 4.77E-150 | 0.406 | 8  | 13.4  | Q2 |
| IPI00006957 | DHRS7    | 7.7  | 1.24E-13  | 0.406 | 3  | 18.5  | Q2 |
| IPI00017510 | MT-CO2   | 35.2 | 8.72E-133 | 0.407 | 8  | 35.3  | Q2 |
| IPI00013860 | HIBADH   | 34.2 | 3.29E-190 | 0.407 | 6  | 10.4  | Q2 |
| IPI00009634 | SQRDL    | 26   | 1.27E-109 | 0.409 | 10 | 6.3   | Q2 |
| IPI00179330 | RPS27A   | 42.3 | 1.53E-80  | 0.412 | 71 | 24.1  | Q2 |
| IPI00007188 | SLC25A5  | 19.5 | 4.73E-161 | 0.412 | 7  | 8.2   | Q2 |
| IPI00005794 | PGCP     | 6.7  | 9.90E-21  | 0.414 | 3  | 14.4  | Q2 |
| IPI00034159 | ATP6V0D1 | 21.4 | 7.08E-56  | 0.414 | 5  | 6.2   | Q2 |
| IPI00007750 | TUBA4A   | 10.7 | <1.0E-304 | 0.420 | 13 | 69.3  | Q2 |
| IPI00016372 | RAB9A    | 27.4 | 1.95E-61  | 0.420 | 2  | 16.0  | Q2 |
| IPI00006579 | COX4I1   | 43.2 | 4.77E-42  | 0.420 | 4  | 3.3   | Q2 |
| IPI00019755 | GSTO1    | 51   | 2.02E-72  | 0.420 | 21 | 45.3  | Q2 |
| IPI00001699 | PYCARD   | 42.6 | 2.23E-62  | 0.421 | 2  | 1.9   | Q2 |
| IPI00306516 | TIMM44   | 16.6 | 1.69E-32  | 0.422 | 2  | 3.4   | Q2 |
| IPI00103467 | ALDH1B1  | 23.8 | 6.40E-265 | 0.422 | 9  | 21.1  | Q2 |
| IPI00293073 | MFN1     | 5.7  | 2.12E-46  | 0.423 | 3  | 14.0  | Q2 |
| IPI00027505 | ITGAV    | 30.5 | 1.40E-301 | 0.424 | 47 | 20.0  | Q2 |
| IPI00396231 | AER61    | 8.3  | 8.76E-24  | 0.425 | 2  | 8.8   | Q2 |
| IPI00639812 | MGST3    | 16.9 | 1.83E-97  | 0.427 | 4  | 27.3  | Q2 |
| IPI00005966 | NDUFA12  | 14.4 | 1.89E-06  | 0.432 | 3  | 9.8   | Q2 |

|             |          |      |           |       |     |      |    |
|-------------|----------|------|-----------|-------|-----|------|----|
| IPI00008485 | ACO1     | 45.1 | <1.0E-304 | 0.434 | 45  | 10.4 | Q2 |
| IPI00215824 | PSMB8    | 25.4 | 1.37E-67  | 0.434 | 4   | 20.4 | Q2 |
| IPI00298281 | LAMC1    | 19   | <1.0E-304 | 0.435 | 20  | 15.4 | Q2 |
| IPI00874185 | HIBCH    | 15.9 | 7.42E-40  | 0.436 | 3   | 31.4 | Q2 |
| IPI00018600 | OPA3     | 13.4 | 2.74E-02  | 0.436 | 2   | 12.5 | Q2 |
| IPI00184363 | GLTP     | 17.7 | 1.49E-60  | 0.436 | 4   | 13.9 | Q2 |
| IPI00007676 | HSD17B12 | 35.6 | 6.98E-92  | 0.440 | 5   | 22.0 | Q2 |
| IPI00028520 | NDUFV1   | 18.3 | 8.57E-52  | 0.441 | 4   | 5.3  | Q2 |
| IPI00003968 | NDUFA9   | 24.4 | 5.07E-41  | 0.441 | 4   | 2.2  | Q2 |
| IPI00030363 | ACAT1    | 46.4 | <1.0E-304 | 0.446 | 16  | 8.1  | Q2 |
| IPI00007155 | VPS28    | 26.2 | 4.27E-102 | 0.447 | 2   | 38.4 | Q2 |
| IPI00218343 | TUBA1C   | 12.2 | <1.0E-304 | 0.447 | 24  | 43.3 | Q2 |
| IPI00413696 | CD47     | 4.9  | 5.48E-03  | 0.449 | 5   | 7.6  | Q2 |
| IPI00008575 | KHDRBS1  | 18.5 | 5.43E-54  | 0.449 | 2   | 7.9  | Q2 |
| IPI00008787 | NAGLU    | 26.8 | 9.07E-267 | 0.457 | 11  | 7.6  | Q2 |
| IPI00927614 | GOLGA4   | 11.3 | 2.30E-86  | 0.459 | 11  | 19.7 | Q2 |
| IPI00027341 | CAPG     | 44.5 | 7.58E-151 | 0.459 | 8   | 54.2 | Q2 |
| IPI00000105 | MVP      | 70.5 | <1.0E-304 | 0.460 | 95  | 48.2 | Q2 |
| IPI00513761 | RP3      | 24.6 | 7.27E-144 | 0.462 | 3   | 16.0 | Q2 |
| IPI00293564 | HMGCL    | 25.8 | 5.58E-76  | 0.466 | 5   | 14.9 | Q2 |
| IPI00003856 | ATP6V1E1 | 45.6 | 6.48E-72  | 0.470 | 8   | 7.7  | Q2 |
| IPI00007682 | ATP6V1A  | 57.9 | <1.0E-304 | 0.472 | 21  | 9.7  | Q2 |
| IPI00027745 | GUSB     | 6    | 1.10E-04  | 0.473 | 2   | 14.5 | Q2 |
| IPI00871932 | SPTBN1   | 55.7 | <1.0E-304 | 0.473 | 130 | 40.5 | Q2 |
| IPI00329685 | ARSA     | 12   | 2.11E-97  | 0.480 | 3   | 12.3 | Q2 |
| IPI00852987 | TYMP     | 27.3 | 2.45E-142 | 0.481 | 3   | 10.7 | Q2 |
| IPI00012102 | GNS      | 38.2 | 6.25E-250 | 0.483 | 30  | 62.2 | Q2 |
| IPI00293074 | SLC44A2  | 6.5  | 2.16E-07  | 0.486 | 2   | 16.1 | Q2 |
| IPI00026105 | SCP2     | 28.7 | 1.95E-115 | 0.491 | 10  | 11.4 | Q2 |
| IPI00003411 | PTGIS    | 34.4 | 8.82E-172 | 0.491 | 13  | 7.7  | Q2 |
| IPI00024983 | RTN2     | 3.1  | 8.32E-04  | 0.493 | 2   | 2.6  | Q2 |
| IPI00793199 | ANXA4    | 61.1 | <1.0E-304 | 0.494 | 38  | 13.2 | Q2 |
| IPI00873452 | LMCD1    | 40.1 | 2.97E-139 | 0.498 | 9   | 13.3 | Q2 |

|             |                |      |           |       |     |       |    |
|-------------|----------------|------|-----------|-------|-----|-------|----|
| IPI00217766 | SCARB2         | 33.5 | 4.43E-111 | 0.498 | 23  | 19.0  | Q2 |
| IPI00294834 | ASPH           | 39.4 | <1.0E-304 | 0.499 | 34  | 11.2  | Q2 |
| IPI00789848 | IVD            | 13.4 | 3.89E-08  | 0.500 | 4   | 10.7  | Q2 |
| IPI00026964 | UQCRFS1        | 19   | 2.79E-36  | 0.503 | 2   | 19.6  | Q3 |
| IPI00154567 | SPATA20        | 8.4  | 8.70E-44  | 0.504 | 3   | 4.8   | Q3 |
| IPI00007084 | SLC25A13       | 23.1 | 6.33E-230 | 0.509 | 7   | 8.9   | Q3 |
| IPI00221224 | ANPEP          | 49.8 | <1.0E-304 | 0.509 | 168 | 48.3  | Q3 |
| IPI00297452 | TFG/ALK fusion | 3.1  | 1.20E-04  | 0.513 | 4   | 146.2 | Q3 |
| IPI00257882 | PEPD           | 31.8 | 5.52E-238 | 0.517 | 17  | 13.0  | Q3 |
| IPI00293088 | GAA            | 24.5 | <1.0E-304 | 0.526 | 18  | 45.8  | Q3 |
| IPI00008494 | ICAM1          | 18.8 | 3.11E-82  | 0.530 | 9   | 30.7  | Q3 |
| IPI00913938 | IPO11          | 3.9  | 3.79E-06  | 0.530 | 2   | 238.1 | Q3 |
| IPI00295741 | CTSB           | 46.9 | <1.0E-304 | 0.531 | 20  | 52.0  | Q3 |
| IPI00410631 | FAM45A         | 4.8  | 2.64E-04  | 0.531 | 2   | 32.9  | Q3 |
| IPI00100460 | DARS2          | 6    | 5.75E-09  | 0.533 | 3   | 14.9  | Q3 |
| IPI00442121 | ALAD           | 13.1 | 1.46E-38  | 0.536 | 3   | 56.5  | Q3 |
| IPI00029264 | CYC1           | 10.8 | 5.89E-40  | 0.539 | 3   | 38.1  | Q3 |
| IPI00440703 | GSTK1          | 39.7 | 1.16E-177 | 0.539 | 8   | 8.4   | Q3 |
| IPI00551024 | DAK            | 12.9 | 3.26E-53  | 0.540 | 2   | 6.8   | Q3 |
| IPI00027851 | HEXA           | 27.8 | 8.83E-165 | 0.540 | 10  | 19.1  | Q3 |
| IPI00305383 | UQCRC2         | 37.7 | 2.29E-229 | 0.542 | 12  | 7.1   | Q3 |
| IPI00026850 | TSPO           | 18.3 | 1.90E-39  | 0.544 | 3   | 6.3   | Q3 |
| IPI00555902 | OCIAD2         | 20.8 | 8.42E-06  | 0.544 | 2   | 23.0  | Q3 |
| IPI00021983 | NCSTN          | 14.5 | 5.03E-45  | 0.545 | 17  | 31.5  | Q3 |
| IPI00025285 | ATP6V1G1       | 44.9 | 9.84E-101 | 0.547 | 3   | 3.6   | Q3 |
| IPI00027444 | SERPINB1       | 14.5 | 1.30E-40  | 0.547 | 5   | 12.4  | Q3 |
| IPI00013933 | DSP            | 13.7 | 7.13E-184 | 0.572 | 6   | 66.7  | Q3 |
| IPI00291483 | AKR1C3         | 40.6 | 3.78E-102 | 0.576 | 9   | 19.0  | Q3 |
| IPI00007814 | ATP6V1C1       | 29.6 | 5.46E-135 | 0.578 | 9   | 13.5  | Q3 |
| IPI00884105 | LAMP1          | 15.3 | 1.02E-163 | 0.578 | 28  | 23.9  | Q3 |
| IPI00156689 | VAT1           | 61.3 | <1.0E-304 | 0.578 | 47  | 25.2  | Q3 |
| IPI00299066 | LPXN           | 22   | 2.03E-151 | 0.584 | 2   | 3.8   | Q3 |
| IPI00097495 | TBC1D2         | 17.7 | 1.15E-69  | 0.588 | 7   | 41.1  | Q3 |

|             |          |      |           |       |     |       |    |
|-------------|----------|------|-----------|-------|-----|-------|----|
| IPI00033036 | METAP2   | 8.4  | 2.62E-40  | 0.594 | 2   | 9.7   | Q3 |
| IPI00009803 | ITGA4    | 2.3  | 1.19E-06  | 0.595 | 3   | 28.9  | Q3 |
| IPI00007812 | ATP6V1B2 | 53.6 | <1.0E-304 | 0.598 | 18  | 11.0  | Q3 |
| IPI00215997 | CD9      | 4.4  | 4.43E-08  | 0.600 | 4   | 20.3  | Q3 |
| IPI00098902 | OGDH     | 29.8 | 3.36E-217 | 0.600 | 20  | 55.0  | Q3 |
| IPI00017567 | ENG      | 14.4 | 1.25E-82  | 0.604 | 4   | 12.0  | Q3 |
| IPI00022462 | TFRC     | 38.9 | 1.83E-276 | 0.621 | 36  | 63.4  | Q3 |
| IPI00607799 | BDH2     | 36.3 | 4.94E-94  | 0.633 | 2   | 6.0   | Q3 |
| IPI00554538 | TPP1     | 18.7 | <1.0E-304 | 0.633 | 7   | 9.2   | Q3 |
| IPI00013744 | ITGA2    | 15.5 | 2.95E-237 | 0.638 | 10  | 18.3  | Q3 |
| IPI00296191 | ATP6V1H  | 33.1 | 1.51E-212 | 0.639 | 6   | 4.6   | Q3 |
| IPI00296141 | DPP7     | 16.3 | 1.20E-35  | 0.644 | 3   | 50.5  | Q3 |
| IPI00796891 | GOLGB1   | 27.3 | <1.0E-304 | 0.646 | 25  | 18.3  | Q3 |
| IPI00657648 | EPDR1    | 11.9 | 8.74E-21  | 0.655 | 4   | 11.6  | Q3 |
| IPI00045798 | GPX7     | 13.9 | 4.33E-02  | 0.664 | 2   | 2.3   | Q3 |
| IPI00003807 | ACP2     | 15.8 | 6.09E-28  | 0.665 | 3   | 3.7   | Q3 |
| IPI00289819 | IGF2R    | 15.2 | 1.02E-217 | 0.668 | 27  | 32.3  | Q3 |
| IPI00009305 | GNPDA1   | 57.1 | 1.91E-170 | 0.673 | 11  | 30.2  | Q3 |
| IPI00013847 | UQCRC1   | 34.6 | 1.45E-123 | 0.680 | 8   | 5.5   | Q3 |
| IPI00030371 | TRIM4    | 2.2  | 2.43E-01  | 0.684 | 13  | 68.0  | Q3 |
| IPI00019988 | SGSH     | 23.5 | 1.03E-90  | 0.691 | 3   | 19.5  | Q3 |
| IPI00023191 | TOM1     | 11.4 | 1.65E-103 | 0.692 | 2   | 6.5   | Q3 |
| IPI00295461 | FAP      | 1.4  | 3.77E-280 | 0.696 | 2   | 24.3  | Q3 |
| IPI00020557 | LRP1     | 25.7 | <1.0E-304 | 0.699 | 178 | 35.1  | Q3 |
| IPI00871988 | SFXN3    | 47.7 | 4.61E-183 | 0.714 | 13  | 14.6  | Q3 |
| IPI00399307 | PRCP     | 18   | 3.12E-173 | 0.730 | 6   | 46.1  | Q3 |
| IPI00007117 | SERPINB2 | 27.7 | 1.26E-233 | 0.739 | 3   | 10.3  | Q3 |
| IPI00739827 | LAMP2    | 12.9 | 5.78E-35  | 0.739 | 19  | 30.6  | Q3 |
| IPI00260715 | FUS      | 19.3 | 1.47E-215 | 0.744 | 4   | 224.8 | Q3 |
| IPI00005107 | NPC1     | 15.3 | 3.03E-152 | 0.744 | 27  | 34.0  | Q3 |
| IPI00012585 | HEXB     | 36   | 6.45E-127 | 0.746 | 25  | 16.2  | Q3 |
| IPI00294186 | LACTB    | 6.2  | 6.43E-61  | 0.757 | 2   | 13.6  | Q3 |
| IPI00298476 | GREM1    | 31   | 6.67E-47  | 0.764 | 2   | 83.2  | Q3 |

|             |          |      |           |       |     |       |    |
|-------------|----------|------|-----------|-------|-----|-------|----|
| IPI00477962 | UAP1L1   | 18.5 | 4.40E-117 | 0.771 | 5   | 6.5   | Q3 |
| IPI00215998 | CD63     | 13.4 | 5.96E-16  | 0.784 | 29  | 19.6  | Q3 |
| IPI00218914 | ALDH1A1  | 68.5 | <1.0E-304 | 0.788 | 53  | 25.8  | Q3 |
| IPI00002824 | CSRP2    | 61.7 | 7.58E-69  | 0.815 | 7   | 34.8  | Q3 |
| IPI00029741 | ITGB5    | 7.8  | 2.25E-45  | 0.846 | 2   | 5.5   | Q3 |
| IPI00479145 | KRT19    | 29   | 2.01E-66  | 0.847 | 4   | 46.7  | Q3 |
| IPI00219684 | FABP3    | 80.5 | 8.04E-83  | 0.853 | 15  | 14.4  | Q3 |
| IPI00019502 | MYH9     | 75.4 | <1.0E-304 | 0.895 | 743 | 66.2  | Q3 |
| IPI00465315 | CYCS     | 55.2 | 1.01E-55  | 0.915 | 4   | 15.0  | Q3 |
| IPI00410488 | CD276    | 29.4 | 6.27E-101 | 0.944 | 6   | 32.4  | Q3 |
| IPI00909642 | FLNA     | 0.6  | <1.0E-304 | 0.952 | 4   | 152.3 | Q3 |
| IPI00015102 | ALCAM    | 25.2 | 9.58E-171 | 0.980 | 10  | 19.4  | Q3 |
| IPI00913924 | LRRC15   | 25.9 | 7.68E-125 | 1.089 | 7   | 12.3  | Q3 |
| IPI00152535 | CHD5     | 0.4  | 2.15E-69  | 1.090 | 3   | 211.4 | Q3 |
| IPI00022200 | COL6A3   | 54.5 | <1.0E-304 | 1.099 | 500 | 131.4 | Q3 |
| IPI00872692 | QPRT     | 17.9 | 1.62E-42  | 1.150 | 5   | 8.4   | Q3 |
| IPI00012119 | DCN      | 21.4 | 1.22E-40  | 1.240 | 5   | 50.4  | Q3 |
| IPI00021978 | PEX11B   | 15.8 | 8.31E-04  | 1.361 | 2   | 216.2 | Q3 |
| IPI00304577 | AP2A1    | 48.8 | <1.0E-304 | 1.500 | 74  | 241.4 | Q3 |
| IPI00872194 | COLEC12  | 10.2 | 8.64E-24  | 1.513 | 5   | 140.5 | Q3 |
| IPI00514914 | DIAPH2   | 4.3  | 3.93E-11  | 1.622 | 3   | 229.1 | Q3 |
| IPI00018953 | DPP4     | 41.9 | <1.0E-304 | 1.888 | 46  | 27.0  | Q3 |
| IPI00180386 | GYG1     | 19.7 | 3.32E-104 | 1.975 | 4   | 8.0   | Q3 |
| IPI00333541 | FLNA     | 72.9 | <1.0E-304 | 2.277 | 868 | 141.4 | Q3 |
| IPI00010790 | BGN      | 32.1 | 2.49E-37  | 2.303 | 15  | 49.5  | Q3 |
| IPI00420088 | KIAA0174 | 7.5  | 9.34E-03  | 2.305 | 3   | 118.6 | Q3 |
| IPI00010157 | MAT2A    | 17.2 | 3.42E-86  | 2.371 | 3   | 307.0 | Q3 |
| IPI00420108 | DLST     | 24.3 | 1.29E-128 | 2.922 | 10  | 258.0 | Q3 |
| IPI00020987 | PRELP    | 10.2 | 2.65E-40  | 2.941 | 2   | 42.4  | Q3 |
| IPI00743696 | COL4A1   | 4    | 1.82E-08  | 3.249 | 3   | 116.9 | Q3 |
| IPI00032473 | PPIL3    | 26.1 | 3.25E-19  | 3.433 | 3   | 7.1   | Q3 |
| IPI00306322 | COL4A2   | 2    | 1.71E-16  | 3.514 | 4   | 61.4  | Q3 |
| IPI00002606 | SCIN     | 7.1  | 3.37E-12  | 3.532 | 2   | 7.0   | Q3 |



**Supplementary Table 3: Keratinocyte control.** Cell lysates were prepared from unlabeled (Arg0/Lys0) and labeled (Arg10/Lys8) keratinocytes after 7 cell doublings in culture (D7). Shown are normalized log<sub>2</sub> transformed protein ratios of identified proteins. For identification a minimum of 2 peptides per protein has to be identified (unique + razor). The database used for identification was a decoy database based on IPI v. 3.59 containing in total 160,820 entries. As a criterium for identification the posterior error probability rate of identified proteins (PEP) is shown. The peptide numbers represent peptides used for quantitation.

| Protein ID    | Gene Symbol | Unique + Razor<br>Sequence<br>Coverage [%] | PEP       | Log <sub>2</sub> Ratio | Peptide<br>No. | Variability<br>[%] | Quantile |
|---------------|-------------|--------------------------------------------|-----------|------------------------|----------------|--------------------|----------|
| IPI00456048;I | COMMD2      | 7.5                                        | 8.87E-07  | -2.071                 | 2              | 219.7              | Q1       |
| IPI00794221;I | DBN1        | 19.4                                       | 3.45E-256 | -1.037                 | 2              | 103.5              | Q1       |
| IPI00169285   | PLBD2       | 4.9                                        | 2.88E-09  | -1.026                 | 4              | 59.8               | Q1       |
| IPI00922476;I | EVPL        | 16                                         | 1.39E-170 | -0.786                 | 2              | 63.9               | Q1       |
| IPI00306290;I | XPOT        | 11                                         | 5.28E-114 | -0.679                 | 2              | 45.7               | Q1       |
| IPI00744015;I | DYNC112     | 9.2                                        | 1.91E-57  | -0.675                 | 2              | 70.3               | Q1       |
| IPI00025717;I | MTX2        | 8.7                                        | 3.57E-04  | -0.588                 | 2              | 68.4               | Q1       |
| IPI00845319;I | EPN3        | 2.6                                        | 9.80E-08  | -0.546                 | 2              | 4.4                | Q1       |
| IPI00023728   | GGH         | 18.2                                       | 4.05E-40  | -0.529                 | 3              | 48.3               | Q1       |
| IPI00102501;I | AGTRAP      | 18.9                                       | 4.55E-29  | -0.492                 | 3              | 19.3               | Q2       |
| IPI00028451   | SOX15       | 13.3                                       | 3.97E-10  | -0.484                 | 2              | 40.0               | Q2       |
| IPI00386516;I | KIAA0174    | 11.3                                       | 2.46E-05  | -0.472                 | 2              | 18.2               | Q2       |
| IPI00796919;I | GLB1        | 5                                          | 7.35E-10  | -0.459                 | 2              | 24.4               | Q2       |
| IPI00177716;I | HMGA1       | 14.6                                       | 7.33E-05  | -0.449                 | 2              | 5.7                | Q2       |
| IPI00099986;I | FN3KRP      | 9.1                                        | 2.17E-02  | -0.438                 | 3              | 53.4               | Q2       |
| IPI00102685;I | MYADM       | 3.1                                        | 7.34E-03  | -0.419                 | 2              | 6.0                | Q2       |
| IPI00022403;I | MRPL13      | 38.8                                       | 1.55E-12  | -0.389                 | 4              | 13.4               | Q2       |
| IPI00005670;I | CDC123      | 8                                          | 1.26E-07  | -0.342                 | 2              | 9.4                | Q2       |
| IPI00910797;I | NDFIP2      | 4.5                                        | 1.64E-01  | -0.320                 | 2              | 69.3               | Q2       |
| IPI00013706;I | MRPL20      | 21.5                                       | 3.30E-17  | -0.300                 | 4              | 15.7               | Q2       |
| IPI00013002;I | UBE2C       | 31.8                                       | 3.04E-49  | -0.291                 | 2              | 10.9               | Q2       |
| IPI00925918;I | CCDC12      | 15.1                                       | 7.93E-06  | -0.290                 | 2              | 26.7               | Q2       |
| IPI00003479;I | MAPK1       | 40.6                                       | 3.08E-51  | -0.288                 | 5              | 18.8               | Q2       |
| IPI00024523;I | DNAJB6      | 6.4                                        | 3.65E-13  | -0.288                 | 2              | 9.8                | Q2       |
| IPI00296099;C | THBS1       | 33.7                                       | 3.92E-300 | -0.285                 | 8              | 19.4               | Q2       |
| IPI00412243   | KIAA1609    | 15.8                                       | 2.44E-65  | -0.283                 | 3              | 21.9               | Q2       |

|               |          |      |           |        |    |      |    |
|---------------|----------|------|-----------|--------|----|------|----|
| IPI00301202;l | MAGT1    | 7.4  | 9.99E-10  | -0.282 | 2  | 15.6 | Q2 |
| IPI00019450;l | TROVE2   | 11.7 | 2.53E-58  | -0.280 | 3  | 10.7 | Q2 |
| IPI00398009;l | IPO4     | 10.4 | 3.85E-70  | -0.279 | 2  | 2.7  | Q2 |
| IPI00012069;l | NQO1     | 28.1 | 1.62E-22  | -0.277 | 7  | 5.5  | Q2 |
| IPI00217223   | PAICS    | 3.3  | 1.12E-177 | -0.269 | 2  | 1.7  | Q2 |
| IPI00009822;l | SRP54    | 26   | 1.46E-178 | -0.262 | 2  | 2.8  | Q2 |
| IPI00180954;l | CIRBP    | 20.9 | 2.10E-39  | -0.258 | 3  | 2.0  | Q2 |
| IPI00019488   | IMP3     | 25   | 2.41E-68  | -0.255 | 2  | 21.7 | Q2 |
| IPI00009949;l | PSMF1    | 26.6 | 4.93E-77  | -0.255 | 4  | 9.2  | Q2 |
| IPI00306439;l | C18orf55 | 11.3 | 4.65E-06  | -0.253 | 3  | 9.5  | Q2 |
| IPI00031836;l | DRG1     | 28.6 | 1.03E-85  | -0.241 | 4  | 10.6 | Q2 |
| IPI00419266   | NDUFA6   | 22.1 | 8.09E-05  | -0.241 | 4  | 10.1 | Q2 |
| IPI00025461;l | MT1E     | 32.8 | 9.74E-40  | -0.239 | 2  | 2.1  | Q2 |
| IPI00216260;l | TSFM     | 34.4 | 2.00E-94  | -0.236 | 3  | 20.5 | Q2 |
| IPI00651738   | ADI1     | 19.6 | 2.59E-19  | -0.232 | 3  | 0.6  | Q2 |
| IPI00513805;l | MRPS18A  | 15.6 | 2.61E-07  | -0.232 | 2  | 21.3 | Q2 |
| IPI00022498;l | MT2A     | 67.2 | 3.59E-114 | -0.232 | 8  | 8.6  | Q2 |
| IPI00016703;l | DHCR24   | 17.6 | 6.53E-47  | -0.227 | 4  | 15.4 | Q2 |
| IPI00005737;l | SURF4    | 18.6 | 1.24E-54  | -0.227 | 2  | 6.9  | Q2 |
| IPI00012382;l | SNRPA    | 15.2 | 3.98E-11  | -0.227 | 6  | 20.8 | Q2 |
| IPI00013241;l | UBL5     | 49.3 | 1.67E-09  | -0.227 | 5  | 7.0  | Q2 |
| IPI00441473;l | PRMT5    | 20.7 | 1.19E-111 | -0.227 | 5  | 11.0 | Q2 |
| IPI00008475;l | HMGCS1   | 44.2 | <1.0E-304 | -0.225 | 23 | 7.2  | Q2 |
| IPI00022348;l | PML      | 5.1  | 1.52E-11  | -0.225 | 2  | 11.5 | Q2 |
| IPI00048572   | PTRH1    | 15   | 6.16E-11  | -0.225 | 3  | 4.0  | Q2 |
| IPI00923606;l | EPRS     | 29   | <1.0E-304 | -0.224 | 4  | 23.6 | Q2 |
| IPI00031650;l | NUDT16L1 | 23.2 | 3.13E-34  | -0.221 | 2  | 8.2  | Q2 |
| IPI00220648   | PMVK     | 40.1 | 4.71E-51  | -0.220 | 5  | 21.9 | Q2 |
| IPI00013679;l | DUT      | 34.9 | 7.03E-188 | -0.220 | 13 | 19.1 | Q2 |
| IPI00793155;l | RAB34    | 22.2 | 8.25E-24  | -0.218 | 5  | 27.0 | Q2 |
| IPI00008215   | ME1      | 11.2 | 6.49E-26  | -0.215 | 2  | 12.2 | Q2 |
| IPI00065671;l | UCK2     | 18.8 | 1.65E-42  | -0.213 | 3  | 3.1  | Q2 |
| IPI00396131   | YTHDF3   | 7.8  | 5.36E-05  | -0.212 | 3  | 13.3 | Q2 |
| IPI00029079;l | GMPS     | 28.1 | 3.23E-259 | -0.211 | 2  | 19.1 | Q2 |
| IPI00022305;l | BZW2     | 15.5 | 4.13E-80  | -0.210 | 2  | 0.9  | Q2 |

|               |          |      |           |        |    |       |    |
|---------------|----------|------|-----------|--------|----|-------|----|
| IPI00917683;l | SUMO1    | 29.5 | 1.96E-13  | -0.208 | 4  | 14.2  | Q2 |
| IPI00015953;l | DDX21    | 45.1 | <1.0E-304 | -0.207 | 12 | 16.1  | Q2 |
| IPI00182757;l | KIAA1967 | 19   | 5.92E-96  | -0.207 | 3  | 8.3   | Q2 |
| IPI00418446   | ASAH1    | 11.7 | 1.02E-09  | -0.205 | 5  | 63.7  | Q2 |
| IPI00027180   | ZMPSTE24 | 12.4 | 3.96E-63  | -0.204 | 4  | 5.9   | Q2 |
| IPI00297211   | SMARCA5  | 29.5 | 2.77E-176 | -0.202 | 3  | 39.8  | Q2 |
| IPI00396171;l | MAP4     | 42.9 | 3.87E-278 | -0.202 | 6  | 17.8  | Q2 |
| IPI00154590;l | MKI67IP  | 21.5 | 2.30E-82  | -0.199 | 5  | 9.9   | Q2 |
| IPI00003096   | IL1A     | 31   | 1.92E-166 | -0.199 | 5  | 4.6   | Q2 |
| IPI00032853;l | NOP10    | 37.5 | 1.04E-03  | -0.198 | 5  | 24.5  | Q2 |
| IPI00100154;l | TOLLIP   | 25.2 | 1.45E-37  | -0.197 | 4  | 118.5 | Q2 |
| IPI00215888;l | SRP72    | 22.7 | 1.91E-202 | -0.197 | 3  | 15.8  | Q2 |
| IPI00640525;l | PPGB     | 9    | 3.48E-53  | -0.196 | 2  | 1.8   | Q2 |
| IPI00298851   | CD151    | 9.9  | 7.41E-04  | -0.195 | 2  | 19.7  | Q2 |
| IPI00395694;l | TNPO3    | 6.8  | 6.63E-123 | -0.193 | 2  | 35.6  | Q2 |
| IPI00217553   | MRPL41   | 38.7 | 6.73E-34  | -0.191 | 5  | 11.9  | Q2 |
| IPI00031526   | C19orf43 | 19.9 | 2.18E-09  | -0.188 | 3  | 11.3  | Q2 |
| IPI00642904;l | PABPC4   | 10.6 | 2.84E-224 | -0.188 | 6  | 6.0   | Q2 |
| IPI00896498;l | MMP14    | 7.7  | 1.04E-21  | -0.187 | 3  | 33.7  | Q2 |
| IPI00021266;l | RPL23A   | 46.8 | 6.22E-59  | -0.187 | 25 | 15.0  | Q2 |
| IPI00100656;l | GPSN2    | 23.1 | 9.54E-26  | -0.186 | 13 | 9.3   | Q2 |
| IPI00784414;l | STAT3    | 15.1 | 9.58E-62  | -0.186 | 3  | 4.7   | Q2 |
| IPI00790743;l | RPL36AL  | 7.2  | 2.51E-22  | -0.185 | 7  | 25.4  | Q2 |
| IPI00030877;l | 40436    | 12.7 | 1.46E-15  | -0.181 | 3  | 14.9  | Q2 |
| IPI00642032;l | TXNL1    | 41.5 | 1.28E-167 | -0.179 | 6  | 8.3   | Q2 |
| IPI00455153;l | NFU1     | 26   | 2.06E-27  | -0.179 | 2  | 20.9  | Q2 |
| IPI00024320;l | RBM3     | 31.8 | 5.33E-62  | -0.177 | 9  | 5.6   | Q2 |
| IPI00020004;l | TMEM97   | 10.2 | 7.77E-04  | -0.176 | 2  | 1.2   | Q2 |
| IPI00022228;l | HDLBP    | 39.1 | <1.0E-304 | -0.176 | 2  | 13.8  | Q2 |
| IPI00414860;l | RPL37A   | 51.1 | 3.02E-52  | -0.176 | 11 | 10.4  | Q2 |
| IPI00456925;l | DBNL     | 38.6 | 5.59E-94  | -0.174 | 4  | 44.6  | Q2 |
| IPI00026665;l | QARS     | 43.8 | 5.04E-217 | -0.174 | 9  | 21.8  | Q2 |
| IPI00550894;l | GNPDA2   | 10.5 | 6.04E-88  | -0.173 | 3  | 16.7  | Q2 |
| IPI00513971;l | RPS27    | 40.5 | 1.61E-29  | -0.172 | 10 | 8.4   | Q2 |
| IPI00004459   | DIMT1L   | 23   | 4.00E-23  | -0.172 | 4  | 4.9   | Q2 |

|               |          |      |           |        |    |      |    |
|---------------|----------|------|-----------|--------|----|------|----|
| IPI00001560;l | CDKN2A   | 37.7 | 9.51E-68  | -0.171 | 3  | 10.2 | Q2 |
| IPI00791086;l | EIF3D    | 18.8 | 2.25E-177 | -0.170 | 4  | 9.2  | Q2 |
| IPI00477982;l | RPS6KA1  | 13.4 | 3.44E-71  | -0.169 | 6  | 27.5 | Q2 |
| IPI00007087;l | FBXO2    | 25   | 2.00E-55  | -0.168 | 4  | 4.7  | Q2 |
| IPI00646839;l | EIF3CL   | 26.1 | 1.46E-118 | -0.167 | 10 | 8.2  | Q2 |
| IPI00456940;l | RPL7L1   | 22.8 | 4.06E-22  | -0.167 | 6  | 7.9  | Q2 |
| IPI00292354;l | RNF181   | 17.6 | 3.65E-06  | -0.166 | 3  | 7.5  | Q2 |
| IPI00328319;l | RBBP4    | 18.8 | 5.61E-39  | -0.166 | 3  | 17.0 | Q2 |
| IPI00910513;l | GSPT1    | 18.2 | 2.30E-69  | -0.165 | 8  | 11.7 | Q2 |
| IPI00552277;l | UBL4A    | 28.3 | 1.44E-16  | -0.165 | 5  | 8.1  | Q2 |
| IPI00032879;l | AK6      | 23.8 | 7.90E-39  | -0.165 | 2  | 1.2  | Q2 |
| IPI00926648;l | APEH     | 13.4 | 3.97E-69  | -0.164 | 4  | 10.3 | Q2 |
| IPI00013871   | RRM1     | 23   | 1.50E-114 | -0.163 | 2  | 26.1 | Q2 |
| IPI00644386;l | FUBP1    | 25.6 | 3.42E-146 | -0.161 | 7  | 10.8 | Q2 |
| IPI00032460;l | LSM2     | 18.9 | 1.61E-10  | -0.158 | 3  | 17.8 | Q2 |
| IPI00307223;l | IL1B     | 19.3 | 3.29E-21  | -0.156 | 6  | 4.8  | Q2 |
| IPI00016605;l | C1orf123 | 15   | 6.09E-03  | -0.156 | 3  | 14.1 | Q2 |
| IPI00291646;l | MTHFD1L  | 14.3 | 3.08E-75  | -0.155 | 4  | 14.3 | Q2 |
| IPI00026904;l | ADSL     | 11.8 | 7.09E-19  | -0.155 | 2  | 4.3  | Q2 |
| IPI00413324;l | RPL17    | 55.4 | 4.13E-90  | -0.155 | 15 | 57.1 | Q2 |
| IPI00290337   | EPS8     | 1.3  | 8.80E-02  | -0.153 | 5  | 8.7  | Q2 |
| IPI00029665;l | MMAB     | 8    | 3.49E-08  | -0.153 | 3  | 11.8 | Q2 |
| IPI00010349;l | AGPS     | 15.3 | 4.59E-151 | -0.152 | 2  | 0.8  | Q2 |
| IPI00550523;l | ATL3     | 22.7 | 7.30E-173 | -0.151 | 6  | 10.3 | Q2 |
| IPI00479905;l | NDUFB10  | 51.2 | 1.30E-45  | -0.151 | 3  | 7.4  | Q2 |
| IPI00872664;l | USP14    | 26.3 | 4.57E-94  | -0.151 | 8  | 13.2 | Q2 |
| IPI00166785;l | MMGT1    | 7.7  | 3.30E-03  | -0.149 | 3  | 21.7 | Q2 |
| IPI00032831;l | SNAP29   | 12   | 2.73E-16  | -0.149 | 3  | 8.8  | Q2 |
| IPI00218466;l | SEC61A1  | 8.3  | 1.52E-09  | -0.148 | 5  | 9.8  | Q2 |
| IPI00745105;l | C16orf13 | 25.5 | 1.04E-39  | -0.148 | 4  | 9.3  | Q2 |
| IPI00430812;l | CNBP     | 26.6 | 3.58E-48  | -0.147 | 3  | 13.4 | Q2 |
| IPI00028390   | MRPL34   | 23.9 | 1.93E-03  | -0.147 | 2  | 12.2 | Q2 |
| IPI00012833   | PPP4C    | 27   | 9.68E-147 | -0.146 | 4  | 13.9 | Q2 |
| IPI00022648;l | EIF5     | 28.3 | 3.07E-103 | -0.146 | 4  | 24.3 | Q2 |
| IPI00013146;l | MRPS22   | 31.7 | 5.64E-59  | -0.144 | 3  | 21.3 | Q2 |

|               |           |      |           |        |    |       |    |
|---------------|-----------|------|-----------|--------|----|-------|----|
| IPI00180240;l | TMSL3     | 31.8 | 1.12E-24  | -0.144 | 3  | 13.8  | Q2 |
| IPI00025347;l | EMG1      | 38.1 | 1.00E-72  | -0.144 | 3  | 7.7   | Q2 |
| IPI00006970   | MRPS2     | 13.2 | 1.40E-10  | -0.143 | 4  | 5.9   | Q2 |
| IPI00031629;l | PDCL3     | 34.7 | 1.74E-92  | -0.142 | 2  | 15.6  | Q2 |
| IPI00871843;l | TGM2      | 21.6 | 1.09E-135 | -0.142 | 12 | 12.4  | Q2 |
| IPI00217018;l | SAMD9     | 3    | 3.82E-13  | -0.142 | 2  | 19.6  | Q2 |
| IPI00007691;l | TRAPPC4   | 40.2 | 2.65E-46  | -0.141 | 4  | 7.5   | Q2 |
| IPI00020191;l | PTP4A2    | 18.6 | 5.44E-09  | -0.141 | 2  | 1.1   | Q2 |
| IPI00657888;l | GMPPA     | 11.6 | 3.35E-108 | -0.141 | 3  | 10.0  | Q2 |
| IPI00005740;l | COX4NB    | 29   | 9.08E-29  | -0.140 | 4  | 41.7  | Q2 |
| IPI00514501;l | C1orf57   | 33.8 | 8.34E-48  | -0.140 | 4  | 5.6   | Q2 |
| IPI00019326   | FDX1      | 9.8  | 5.25E-06  | -0.140 | 2  | 7.8   | Q2 |
| IPI00215687;l | GLS       | 26.4 | 4.10E-81  | -0.139 | 3  | 9.3   | Q2 |
| IPI00008351;l | SELT      | 11.8 | 4.83E-06  | -0.139 | 2  | 10.6  | Q2 |
| IPI00329441;l | RAB43     | 30.2 | 6.40E-30  | -0.139 | 2  | 7.2   | Q2 |
| IPI00299468;l | SCD       | 10.3 | 2.43E-26  | -0.138 | 6  | 5.0   | Q2 |
| IPI00003320   | C11orf10  | 10.1 | 1.68E-02  | -0.137 | 10 | 7.3   | Q2 |
| IPI00168036;l | TMEM40    | 17.3 | 2.59E-54  | -0.134 | 3  | 9.7   | Q2 |
| IPI00871176;l | NIPSNAP3A | 19.1 | 2.46E-44  | -0.134 | 4  | 8.8   | Q2 |
| IPI00013468;l | BUB3      | 24.7 | 3.56E-34  | -0.133 | 6  | 13.5  | Q2 |
| IPI00021808;l | HARS      | 41.3 | 6.52E-146 | -0.132 | 11 | 25.2  | Q2 |
| IPI00102313;l | SRA1      | 17.7 | 1.62E-11  | -0.132 | 4  | 12.5  | Q2 |
| IPI00816474;l | FAM127A   | 14.2 | 2.40E-02  | -0.132 | 2  | 20.1  | Q2 |
| IPI00012340;l | SFRS9     | 36.7 | 4.72E-37  | -0.131 | 10 | 7.2   | Q2 |
| IPI00783097;l | GARS      | 30.7 | <1.0E-304 | -0.129 | 16 | 9.4   | Q2 |
| IPI00016613;l | CSNK2A1   | 34.3 | 2.03E-95  | -0.129 | 5  | 10.7  | Q2 |
| IPI00739827;l | LAMP2     | 9    | 3.25E-08  | -0.128 | 2  | 9.1   | Q2 |
| IPI00100775;l | C11orf67  | 44.3 | 7.13E-16  | -0.128 | 5  | 19.3  | Q2 |
| IPI00827535;l | PTMA      | 35.1 | 1.47E-154 | -0.128 | 12 | 14.2  | Q2 |
| IPI00604777;l | DPP9      | 12.1 | 3.56E-86  | -0.128 | 2  | 1.3   | Q2 |
| IPI00329692;l | NMT1      | 20   | 8.01E-90  | -0.128 | 3  | 115.0 | Q2 |
| IPI00183786;l | FADS2     | 17.3 | 6.11E-19  | -0.127 | 2  | 10.3  | Q2 |
| IPI00023529;l | CDK6      | 22.1 | 4.11E-50  | -0.126 | 3  | 15.2  | Q2 |
| IPI00295772;l | CYP51A1   | 22.4 | 6.64E-129 | -0.126 | 3  | 12.8  | Q2 |
| IPI00220578;l | GNAI3     | 13.6 | 2.85E-69  | -0.125 | 5  | 7.7   | Q2 |

|               |          |      |           |        |    |      |    |
|---------------|----------|------|-----------|--------|----|------|----|
| IPI00922511;l | F11R     | 35.6 | 8.32E-62  | -0.125 | 9  | 18.4 | Q2 |
| IPI00219344;l | HPCAL1   | 34.2 | 4.58E-43  | -0.124 | 7  | 15.4 | Q2 |
| IPI00884896;l | TXNRD1   | 21.7 | 1.29E-108 | -0.123 | 6  | 16.1 | Q2 |
| IPI00152695;l | WDR82    | 20.4 | 2.13E-143 | -0.122 | 6  | 13.3 | Q2 |
| IPI00795107;l | TATDN1   | 20.1 | 4.52E-47  | -0.122 | 2  | 20.2 | Q2 |
| IPI00001145   | AP4S1    | 6.9  | 5.29E-03  | -0.120 | 2  | 18.8 | Q2 |
| IPI00008982;l | ALDH18A1 | 18.1 | 3.27E-82  | -0.120 | 3  | 8.0  | Q2 |
| IPI00018627;l | NAT13    | 66.9 | 2.88E-75  | -0.119 | 19 | 33.6 | Q2 |
| IPI00396321   | LRRC59   | 42   | <1.0E-304 | -0.118 | 15 | 8.8  | Q2 |
| IPI00019400   | TPMT     | 20.8 | 2.73E-36  | -0.118 | 5  | 4.9  | Q2 |
| IPI00480056;l | RAB4A    | 37.2 | 1.70E-67  | -0.118 | 3  | 7.5  | Q2 |
| IPI00397860;l | CYB5A    | 16.4 | 1.25E-12  | -0.117 | 2  | 11.8 | Q2 |
| IPI00019927   | PSMD7    | 38.6 | 6.27E-86  | -0.117 | 9  | 14.1 | Q2 |
| IPI00019770;l | FAU      | 9    | 6.49E-11  | -0.116 | 10 | 11.1 | Q2 |
| IPI00856049   | RPL22L1  | 19.7 | 1.15E-09  | -0.116 | 3  | 4.2  | Q2 |
| IPI00219677;l | DERA     | 22.3 | 7.44E-24  | -0.116 | 3  | 9.8  | Q2 |
| IPI00011229;l | CTSD     | 36.2 | <1.0E-304 | -0.116 | 33 | 11.9 | Q2 |
| IPI00306301;l | PDHA1    | 21.3 | 1.05E-32  | -0.115 | 4  | 12.4 | Q2 |
| IPI00927455;l | HIGD1A   | 18.8 | 2.39E-56  | -0.115 | 2  | 15.2 | Q2 |
| IPI00020418   | RRAS     | 20.6 | 1.62E-108 | -0.114 | 5  | 13.6 | Q2 |
| IPI00013933;l | DSP      | 56.1 | <1.0E-304 | -0.114 | 5  | 10.0 | Q2 |
| IPI00163230;l | COPS6    | 16.5 | 4.45E-21  | -0.113 | 3  | 12.7 | Q2 |
| IPI00604414;l | PLAU     | 6.7  | 1.96E-05  | -0.113 | 4  | 17.4 | Q2 |
| IPI00896381;l | PIP5K2C  | 17.8 | 2.72E-92  | -0.113 | 2  | 27.6 | Q2 |
| IPI00465179;l | PFKM     | 12.6 | 2.17E-70  | -0.112 | 2  | 2.4  | Q2 |
| IPI00021399   | FGFBP1   | 24.8 | 8.14E-37  | -0.112 | 4  | 20.7 | Q2 |
| IPI00301021;l | SSR1     | 11.9 | 2.75E-41  | -0.112 | 3  | 2.8  | Q2 |
| IPI00017617;l | DDX5     | 35.3 | 8.28E-157 | -0.112 | 16 | 11.4 | Q2 |
| IPI00011635;l | BCL2L13  | 1.9  | 6.43E-04  | -0.112 | 2  | 37.6 | Q2 |
| IPI00640088;l | CSNK2B   | 44.4 | 1.55E-114 | -0.111 | 6  | 12.6 | Q2 |
| IPI00010158;l | CHRAC1   | 19.8 | 8.71E-07  | -0.110 | 2  | 8.7  | Q2 |
| IPI00013678;l | MTX1     | 8.2  | 9.24E-32  | -0.110 | 2  | 3.0  | Q2 |
| IPI00215911;l | APEX1    | 44.7 | 5.49E-178 | -0.109 | 4  | 7.9  | Q2 |
| IPI00172656   | FAF2     | 16.9 | 1.10E-55  | -0.109 | 2  | 28.4 | Q2 |
| IPI00003309;l | POLR2H   | 38.7 | 2.63E-53  | -0.108 | 7  | 7.6  | Q2 |

|               |               |      |           |        |    |      |    |
|---------------|---------------|------|-----------|--------|----|------|----|
| IPI00031655   | VPS25         | 15.9 | 4.68E-07  | -0.107 | 5  | 3.7  | Q2 |
| IPI00844578;I | DHX9          | 40.8 | <1.0E-304 | -0.107 | 17 | 12.2 | Q2 |
| IPI00290305;I | TP53RK        | 14.2 | 3.76E-05  | -0.107 | 3  | 10.7 | Q2 |
| IPI00012007   | AHCY          | 49.5 | 9.08E-206 | -0.107 | 21 | 7.3  | Q2 |
| IPI00018522;I | PRMT1         | 47.2 | 2.88E-237 | -0.107 | 13 | 7.6  | Q2 |
| IPI00010141   | POLE3         | 22.4 | 5.88E-45  | -0.106 | 4  | 6.2  | Q2 |
| IPI00816044;I | C3orf10       | 46.3 | 2.72E-08  | -0.106 | 11 | 16.8 | Q2 |
| IPI00304692;I | RBMX          | 33.5 | 2.16E-103 | -0.104 | 15 | 26.1 | Q2 |
| IPI00300299   | SPCS3         | 15   | 1.61E-09  | -0.104 | 4  | 12.3 | Q2 |
| IPI00017767   | MGST2         | 9.5  | 4.19E-10  | -0.102 | 2  | 1.6  | Q2 |
| IPI00215637;I | DDX3X         | 40   | 8.49E-293 | -0.102 | 17 | 8.0  | Q2 |
| IPI00009950   | LMAN2         | 27.5 | 1.31E-88  | -0.101 | 4  | 5.1  | Q2 |
| IPI00465044   | RCC2          | 19.2 | 2.49E-21  | -0.101 | 3  | 20.0 | Q2 |
| IPI00555597;I | PTRH2         | 39.4 | 8.37E-145 | -0.101 | 4  | 4.8  | Q2 |
| IPI00902883;I | RAPGEFL1      | 1.5  | 4.67E-02  | -0.101 | 2  | 0.6  | Q2 |
| IPI00026519;I | PPIF          | 30   | 6.03E-116 | -0.101 | 9  | 7.7  | Q2 |
| IPI00178440;I | EEF1B2        | 26.2 | 1.15E-136 | -0.101 | 7  | 17.1 | Q2 |
| IPI00783872;I | CAPRIN1       | 15.1 | 1.23E-51  | -0.100 | 5  | 8.4  | Q2 |
| IPI00844264;I | DKFZp779B0247 | 25.1 | 1.90E-263 | -0.100 | 7  | 5.6  | Q2 |
| IPI00477155;I | GTPBP4        | 19.5 | 1.59E-73  | -0.100 | 6  | 19.7 | Q2 |
| IPI00873403;I | RPL24         | 34.1 | 4.04E-60  | -0.100 | 22 | 12.3 | Q2 |
| IPI00334190;I | STOML2        | 38.8 | 7.51E-150 | -0.099 | 7  | 13.9 | Q2 |
| IPI00549248;I | NPM1          | 55.1 | 1.63E-303 | -0.099 | 36 | 13.4 | Q2 |
| IPI00011698;I | SAP18         | 25.6 | 4.41E-05  | -0.097 | 5  | 10.4 | Q2 |
| IPI00294536;I | STRAP         | 58.7 | 1.27E-193 | -0.097 | 12 | 14.1 | Q2 |
| IPI00328867;I | SRC           | 18.5 | 9.41E-58  | -0.097 | 2  | 23.1 | Q2 |
| IPI00922428;I | FKBP9         | 5.9  | 1.34E-05  | -0.097 | 2  | 0.5  | Q2 |
| IPI00301364;I | SKP1          | 44.2 | 4.25E-65  | -0.096 | 12 | 10.4 | Q2 |
| IPI00003817;I | ARHGDI B      | 27.9 | 5.11E-109 | -0.096 | 4  | 15.0 | Q2 |
| IPI00220344;I | RPL36A        | 46.2 | 5.45E-22  | -0.096 | 16 | 10.8 | Q2 |
| IPI00009235   | SSR3          | 7.1  | 3.59E-20  | -0.096 | 2  | 1.8  | Q2 |
| IPI00027505;I | ITGAV         | 15.6 | 1.79E-91  | -0.096 | 3  | 7.6  | Q2 |
| IPI00106491;I | MRTO4         | 33.1 | 7.59E-45  | -0.096 | 13 | 11.4 | Q2 |
| IPI00038378;I | ENOPH1        | 17.6 | 8.09E-41  | -0.095 | 3  | 15.5 | Q2 |
| IPI00294955   | LSM4          | 31.7 | 5.01E-13  | -0.095 | 18 | 14.8 | Q2 |

|               |          |      |           |        |    |      |    |
|---------------|----------|------|-----------|--------|----|------|----|
| IPI00296635   | GBE1     | 8.3  | 3.08E-10  | -0.095 | 2  | 4.2  | Q2 |
| IPI00099463;l | SGPL1    | 3    | 4.62E-02  | -0.094 | 2  | 14.6 | Q2 |
| IPI00554777;l | ASNS     | 7.7  | 2.31E-173 | -0.094 | 2  | 6.4  | Q2 |
| IPI00006606   | MRPS26   | 28.3 | 2.59E-21  | -0.094 | 3  | 8.1  | Q2 |
| IPI00020984;l | CANX     | 30.8 | 1.36E-211 | -0.094 | 15 | 16.7 | Q2 |
| IPI00008575;l | KHDRBS1  | 18.5 | 2.93E-63  | -0.094 | 7  | 26.1 | Q2 |
| IPI00761105;l | TADA2B   | 1.7  | 4.87E-02  | -0.093 | 5  | 11.7 | Q2 |
| IPI00219306;l | MAGOH    | 5.5  | 8.77E-25  | -0.093 | 2  | 8.3  | Q2 |
| IPI00005202   | PGRMC2   | 17   | 3.77E-89  | -0.093 | 5  | 16.5 | Q2 |
| IPI00718888;l | PRPS2    | 30.8 | 8.85E-157 | -0.093 | 7  | 7.5  | Q2 |
| IPI00398576;l | LIMS2    | 4.9  | 1.62E-13  | -0.092 | 3  | 15.6 | Q2 |
| IPI00002506;l | ALG5     | 16.4 | 1.83E-14  | -0.092 | 3  | 5.8  | Q2 |
| IPI00068506;l | ABCF2    | 14   | 3.32E-40  | -0.092 | 2  | 8.6  | Q2 |
| IPI00046828;l | CCDC58   | 27.8 | 1.67E-23  | -0.091 | 4  | 24.2 | Q2 |
| IPI00013296;l | RPS18    | 66.4 | 9.12E-70  | -0.091 | 48 | 17.6 | Q2 |
| IPI00186290;l | EEF2     | 64.3 | <1.0E-304 | -0.091 | 87 | 8.7  | Q2 |
| IPI00646105;l | PYCR1    | 7.7  | 3.16E-06  | -0.091 | 2  | 14.5 | Q2 |
| IPI00218448;l | H2AFZ    | 41.4 | 1.37E-32  | -0.091 | 5  | 22.1 | Q2 |
| IPI00003515   | TRIP11   | 1.8  | 2.22E-08  | -0.091 | 2  | 2.1  | Q2 |
| IPI00012535;l | DNAJA1   | 25.9 | 2.37E-49  | -0.091 | 3  | 6.5  | Q2 |
| IPI00059762;l | LYPLAL1  | 21.1 | 1.32E-02  | -0.090 | 5  | 11.8 | Q2 |
| IPI00025874;l | RPN1     | 37   | 1.22E-299 | -0.090 | 13 | 10.1 | Q2 |
| IPI00003918;l | RPL4     | 48.9 | <1.0E-304 | -0.090 | 42 | 11.8 | Q2 |
| IPI00028031;l | ACADVL   | 19.5 | 3.29E-90  | -0.090 | 2  | 1.1  | Q2 |
| IPI00414442;l | CDK5RAP3 | 9.6  | 7.24E-25  | -0.090 | 2  | 21.1 | Q2 |
| IPI00032881   | MRPS23   | 31.1 | 3.71E-24  | -0.090 | 6  | 7.4  | Q2 |
| IPI00411937;l | NOP56    | 32.7 | <1.0E-304 | -0.089 | 10 | 11.5 | Q2 |
| IPI00291093   | POLR2E   | 40.5 | 2.77E-112 | -0.089 | 6  | 8.0  | Q2 |
| IPI00154451;l | MMS19    | 19.6 | 1.65E-174 | -0.089 | 3  | 20.5 | Q2 |
| IPI00221325;l | RANBP2   | 11.1 | 3.39E-238 | -0.089 | 3  | 2.5  | Q2 |
| IPI00796337;l | PCBP2    | 21.6 | 2.90E-190 | -0.089 | 15 | 9.3  | Q2 |
| IPI00219383;l | NDUFB3   | 21.4 | 4.15E-06  | -0.089 | 2  | 9.6  | Q2 |
| IPI00643554;l | RGS10    | 30.4 | 3.29E-32  | -0.088 | 5  | 28.5 | Q2 |
| IPI00219078;l | ATP2A2   | 29   | <1.0E-304 | -0.086 | 12 | 16.8 | Q2 |
| IPI00018272;l | PNPO     | 13.4 | 4.26E-07  | -0.086 | 2  | 8.3  | Q2 |



|               |           |      |           |        |    |      |    |
|---------------|-----------|------|-----------|--------|----|------|----|
| IPI00554481;l | SLC3A2    | 39.5 | <1.0E-304 | -0.086 | 17 | 14.1 | Q2 |
| IPI00299608;l | PSMD1     | 26.3 | 5.52E-228 | -0.086 | 4  | 22.4 | Q2 |
| IPI00554521;l | FTH1      | 46.4 | 8.78E-49  | -0.085 | 14 | 9.0  | Q2 |
| IPI00414168   | 5-Mar     | 21.6 | 2.71E-58  | -0.085 | 3  | 16.3 | Q2 |
| IPI00008692;l | KRT36     | 1.3  | 1.94E-02  | -0.085 | 2  | 2.3  | Q2 |
| IPI00291893;l | DCUN1D1   | 12.7 | 2.56E-67  | -0.084 | 4  | 14.9 | Q2 |
| IPI00419880;l | RPS3A     | 63.6 | 6.48E-200 | -0.084 | 58 | 11.6 | Q2 |
| IPI00018398   | PSMC3     | 38.7 | 8.60E-159 | -0.084 | 15 | 13.7 | Q2 |
| IPI00024551;l | C15orf24  | 19.4 | 1.65E-06  | -0.084 | 6  | 74.5 | Q2 |
| IPI00789041;l | PNN       | 18.1 | 5.13E-83  | -0.084 | 2  | 6.2  | Q2 |
| IPI00874047;l | MRPS36    | 44.7 | 7.57E-22  | -0.084 | 3  | 9.8  | Q2 |
| IPI00026215   | FEN1      | 19.2 | 2.00E-13  | -0.084 | 2  | 12.0 | Q2 |
| IPI00429689;l | PPP2CB    | 6.8  | 8.09E-221 | -0.084 | 2  | 11.2 | Q2 |
| IPI00006378;l | CCDC72    | 14.1 | 3.30E-03  | -0.082 | 2  | 3.2  | Q2 |
| IPI00550021;l | RPL3      | 44.7 | 1.01E-171 | -0.082 | 29 | 10.3 | Q2 |
| IPI00009302   | PLEK2     | 7.1  | 4.63E-04  | -0.082 | 3  | 13.2 | Q2 |
| IPI00642046;l | RSL1D1    | 28   | 8.94E-148 | -0.082 | 4  | 15.1 | Q2 |
| IPI00298558;l | PDCD10    | 41   | 1.45E-104 | -0.082 | 8  | 8.8  | Q2 |
| IPI00215777;l | SLC25A3   | 45.4 | 2.07E-221 | -0.082 | 29 | 7.4  | Q2 |
| IPI00021840;l | RPS6      | 32.5 | 9.34E-108 | -0.082 | 30 | 10.4 | Q2 |
| IPI00022334   | OAT       | 42.6 | 4.55E-216 | -0.081 | 16 | 9.7  | Q2 |
| IPI00328243;l | PLD3      | 8.4  | 5.66E-24  | -0.081 | 4  | 9.0  | Q2 |
| IPI00017376;l | SEC23B    | 13.8 | 6.08E-105 | -0.081 | 3  | 8.8  | Q2 |
| IPI00302605;l | SLC30A7   | 12.5 | 2.25E-26  | -0.081 | 2  | 12.3 | Q2 |
| IPI00294879;l | RANGAP1   | 40.4 | <1.0E-304 | -0.081 | 13 | 10.0 | Q2 |
| IPI00006980;l | C14orf166 | 54.9 | 8.81E-104 | -0.081 | 16 | 8.2  | Q2 |
| IPI00794900   | MTHFD1    | 39.6 | <1.0E-304 | -0.081 | 17 | 9.3  | Q2 |
| IPI00302740;l | RPS4Y1    | 21.3 | 2.74E-86  | -0.081 | 6  | 9.3  | Q2 |
| IPI00000335   | HINT2     | 24.5 | 1.34E-54  | -0.081 | 4  | 5.2  | Q2 |
| IPI00021812;l | AHNAK     | 71.8 | <1.0E-304 | -0.081 | 34 | 20.2 | Q2 |
| IPI00031615;l | LLPH      | 29.5 | 2.13E-17  | -0.080 | 2  | 7.5  | Q2 |
| IPI00165506   | POLDIP2   | 14.7 | 7.12E-56  | -0.080 | 4  | 9.9  | Q2 |
| IPI00013723;l | PIN1      | 39.9 | 6.32E-125 | -0.079 | 2  | 21.5 | Q2 |
| IPI00168479;l | APOA1BP   | 16   | 4.18E-106 | -0.079 | 3  | 15.7 | Q2 |
| IPI00396630;l | PRKACA    | 14   | 7.72E-54  | -0.078 | 2  | 2.9  | Q2 |

|               |           |      |           |        |    |      |    |
|---------------|-----------|------|-----------|--------|----|------|----|
| IPI00060181;l | EFHD2     | 49.6 | 7.44E-138 | -0.078 | 16 | 8.2  | Q2 |
| IPI00178803;l | PPP2R2C   | 1.6  | 1.68E-05  | -0.078 | 2  | 16.5 | Q2 |
| IPI00103884;l | OVCA2     | 23.8 | 5.56E-41  | -0.078 | 4  | 3.8  | Q2 |
| IPI00479058;l | RPS15     | 31   | 5.03E-103 | -0.077 | 10 | 5.1  | Q2 |
| IPI00853598;l | SEC13     | 23.1 | 7.10E-138 | -0.077 | 6  | 9.4  | Q2 |
| IPI00023406   | HCCS      | 23.5 | 4.02E-32  | -0.077 | 2  | 21.7 | Q2 |
| IPI00031563;l | DDA1      | 17.6 | 4.48E-03  | -0.077 | 2  | 1.9  | Q2 |
| IPI00008986;l | SLC7A5    | 12.6 | 6.16E-123 | -0.076 | 5  | 5.2  | Q2 |
| IPI00884192;l | GPX4      | 24.4 | 6.25E-34  | -0.076 | 2  | 9.3  | Q2 |
| IPI00025849;l | ANP32A    | 20.9 | 6.23E-111 | -0.076 | 4  | 15.7 | Q2 |
| IPI00299024;l | BASP1     | 33.5 | 9.29E-39  | -0.076 | 2  | 1.1  | Q2 |
| IPI00790757;l | DUSP3     | 26.7 | 1.81E-65  | -0.075 | 8  | 11.8 | Q2 |
| IPI00148063   | HEBP1     | 31.2 | 3.80E-47  | -0.075 | 2  | 4.5  | Q2 |
| IPI00019407;l | NSDHL     | 22.8 | 1.38E-38  | -0.075 | 8  | 18.5 | Q2 |
| IPI00029046;l | MLEC      | 17.8 | 6.28E-39  | -0.075 | 7  | 12.2 | Q2 |
| IPI00018288;l | POLR2C    | 34.2 | 1.09E-158 | -0.075 | 3  | 25.2 | Q2 |
| IPI00221035;l | BTF3      | 45.6 | 1.29E-96  | -0.074 | 20 | 18.3 | Q2 |
| IPI00301280;l | TMEM43    | 18.8 | 1.60E-120 | -0.073 | 2  | 12.8 | Q2 |
| IPI00329633;l | TARS      | 53.1 | <1.0E-304 | -0.073 | 24 | 24.0 | Q2 |
| IPI00745613   | EXOSC4    | 22.9 | 9.28E-37  | -0.073 | 2  | 3.5  | Q2 |
| IPI00141318;l | CKAP4     | 44.2 | 2.19E-262 | -0.073 | 17 | 14.5 | Q2 |
| IPI00024705;l | GIPC1     | 37.8 | 1.78E-132 | -0.072 | 11 | 23.1 | Q2 |
| IPI00026358;l | GABARAPL2 | 28.2 | 4.08E-11  | -0.072 | 6  | 16.5 | Q2 |
| IPI00106642   | SDF2L1    | 6.6  | 2.27E-156 | -0.072 | 2  | 2.1  | Q2 |
| IPI00644482;l | PSMG2     | 18.6 | 5.29E-12  | -0.072 | 3  | 11.0 | Q2 |
| IPI00013214;l | MCM3      | 31.8 | 1.33E-220 | -0.072 | 4  | 32.9 | Q2 |
| IPI00297084;l | DDOST     | 28.7 | 1.40E-112 | -0.072 | 11 | 23.3 | Q2 |
| IPI00171701   | ORMDL2    | 21.6 | 2.76E-30  | -0.072 | 6  | 8.5  | Q2 |
| IPI00303318;l | FAM49B    | 29   | 1.44E-152 | -0.072 | 7  | 15.6 | Q2 |
| IPI00000877;l | HYOU1     | 34.8 | <1.0E-304 | -0.072 | 15 | 7.4  | Q2 |
| IPI00412441;l | WAPAL     | 2.7  | 8.03E-17  | -0.072 | 2  | 14.7 | Q2 |
| IPI00008438;l | RPS10     | 47.9 | 1.57E-102 | -0.071 | 23 | 12.1 | Q2 |
| IPI00221106;l | SF3B2     | 21.6 | 1.29E-152 | -0.071 | 3  | 16.4 | Q2 |
| IPI00019385;l | SSR4      | 34.2 | 1.20E-76  | -0.071 | 7  | 9.2  | Q2 |
| IPI00005978;l | SFRS2     | 33.5 | 1.26E-128 | -0.071 | 15 | 7.3  | Q2 |

|               |          |      |           |        |    |      |    |
|---------------|----------|------|-----------|--------|----|------|----|
| IPI00394758;I | ALDH3A2  | 12.6 | 2.46E-57  | -0.070 | 4  | 21.7 | Q2 |
| IPI00289601;I | HDAC2    | 12.4 | 2.69E-86  | -0.070 | 2  | 14.2 | Q2 |
| IPI00020017;I | APM2     | 27.6 | 1.07E-20  | -0.070 | 3  | 9.5  | Q2 |
| IPI00002569   | EIF4EBP1 | 25.4 | 4.89E-12  | -0.070 | 6  | 15.3 | Q2 |
| IPI00007074   | YARS     | 33.9 | 1.73E-38  | -0.069 | 13 | 14.2 | Q2 |
| IPI00215790;I | RPL38    | 44.3 | 2.72E-20  | -0.069 | 15 | 19.3 | Q2 |
| IPI00025329;I | RPL19    | 33.7 | 1.01E-117 | -0.069 | 16 | 12.5 | Q2 |
| IPI00168884;I | ATP6AP2  | 5.4  | 1.57E-02  | -0.069 | 2  | 7.0  | Q2 |
| IPI00003881   | HNRNPF   | 27.7 | 1.46E-196 | -0.068 | 7  | 4.4  | Q2 |
| IPI00217952;I | GFPT1    | 19.2 | 2.06E-118 | -0.068 | 3  | 8.1  | Q2 |
| IPI00003311   | POLR2L   | 38.8 | 8.04E-06  | -0.068 | 6  | 5.7  | Q2 |
| IPI00647650;I | EIF3H    | 35.2 | 4.13E-74  | -0.067 | 10 | 7.9  | Q2 |
| IPI00554648;C | KRT8     | 59.6 | <1.0E-304 | -0.067 | 73 | 12.8 | Q2 |
| IPI00017381;I | RFC4     | 15.2 | 5.39E-21  | -0.067 | 2  | 25.5 | Q2 |
| IPI00218568   | PCBD1    | 24   | 5.55E-04  | -0.067 | 5  | 1.4  | Q2 |
| IPI00031697;I | TMEM109  | 9.1  | 2.25E-20  | -0.067 | 6  | 24.5 | Q2 |
| IPI00339384;I | RDH11    | 35.5 | 5.93E-113 | -0.066 | 3  | 18.7 | Q2 |
| IPI00219381   | NDUFA2   | 19.2 | 1.41E-04  | -0.066 | 2  | 13.2 | Q2 |
| IPI00001568;I | ATP6V1D  | 18.2 | 1.04E-50  | -0.066 | 4  | 7.4  | Q2 |
| IPI00022277   | CCDC56   | 37.7 | 3.94E-15  | -0.066 | 4  | 8.4  | Q2 |
| IPI00654777;I | EIF3F    | 39.5 | 2.60E-130 | -0.065 | 8  | 17.3 | Q2 |
| IPI00032406   | DNAJA2   | 16   | 2.01E-76  | -0.065 | 2  | 30.3 | Q2 |
| IPI00295400;I | WARS     | 32.5 | 3.21E-281 | -0.065 | 8  | 7.3  | Q2 |
| IPI00012831   | HBXIP    | 5.8  | 6.19E-03  | -0.065 | 3  | 6.0  | Q2 |
| IPI00004795   | CLNS1A   | 5.5  | 3.08E-09  | -0.065 | 2  | 20.6 | Q2 |
| IPI00023860;I | NAP1L1   | 19.9 | 1.82E-235 | -0.064 | 10 | 8.3  | Q2 |
| IPI00014361;I | TSTA3    | 25.2 | 8.48E-30  | -0.063 | 6  | 18.3 | Q2 |
| IPI00016669   | RHEB     | 35.9 | 1.25E-17  | -0.063 | 9  | 15.2 | Q2 |
| IPI00006451;I | NSF      | 6.9  | 1.19E-08  | -0.063 | 4  | 18.8 | Q2 |
| IPI00023064;F | HRPAP20  | 45.7 | 3.04E-21  | -0.063 | 6  | 3.4  | Q2 |
| IPI00219678;I | EIF2S1   | 58.7 | 1.19E-190 | -0.063 | 19 | 11.5 | Q2 |
| IPI00908416;I | EIF4E    | 20.6 | 1.51E-16  | -0.063 | 5  | 6.8  | Q2 |
| IPI00004353;I | GTF2A2   | 13.8 | 1.37E-04  | -0.063 | 2  | 15.1 | Q2 |
| IPI00429191   | ETF1     | 30.2 | 2.51E-92  | -0.063 | 8  | 7.4  | Q2 |
| IPI00334282;I | FAM3C    | 51.1 | 8.26E-215 | -0.063 | 17 | 11.1 | Q2 |

|               |          |      |           |        |    |      |    |
|---------------|----------|------|-----------|--------|----|------|----|
| IPI00029264   | CYC1     | 20   | 6.98E-50  | -0.062 | 7  | 8.2  | Q2 |
| IPI00430803   | C2orf79  | 15.7 | 1.00E-06  | -0.062 | 2  | 15.9 | Q2 |
| IPI00893918;I | VAR5     | 33.8 | <1.0E-304 | -0.062 | 4  | 7.5  | Q2 |
| IPI00022254;I | ATG3     | 10.2 | 4.06E-15  | -0.061 | 5  | 13.3 | Q2 |
| IPI00006379;I | NOP58    | 27.2 | 3.61E-209 | -0.061 | 6  | 17.8 | Q2 |
| IPI00847322;I | SOD2     | 27   | 3.27E-17  | -0.060 | 6  | 20.2 | Q2 |
| IPI00020887;I | VAMP7    | 18.6 | 6.96E-11  | -0.060 | 3  | 17.7 | Q2 |
| IPI00300341;I | TCEB1    | 48.2 | 3.42E-42  | -0.060 | 10 | 16.9 | Q2 |
| IPI00783874;I | HDHD2    | 16.2 | 6.77E-41  | -0.060 | 2  | 6.5  | Q2 |
| IPI00073602   | EXOSC6   | 25   | 2.85E-70  | -0.060 | 4  | 10.1 | Q2 |
| IPI00019376;I | 11-Sep   | 15.3 | 1.97E-33  | -0.060 | 4  | 12.2 | Q2 |
| IPI00295098;I | SRPRB    | 52.8 | 8.28E-208 | -0.060 | 12 | 11.3 | Q2 |
| IPI00411426;I | VPS26A   | 37   | 4.93E-115 | -0.060 | 6  | 38.8 | Q2 |
| IPI00002203;I | BCCIP    | 21.7 | 1.85E-92  | -0.060 | 2  | 5.3  | Q2 |
| IPI00032409;I | ROBLD3   | 40   | 1.15E-34  | -0.059 | 4  | 13.3 | Q2 |
| IPI00182289;I | RPS29    | 48.2 | 9.36E-09  | -0.059 | 9  | 10.6 | Q2 |
| IPI00384047;I | TRAPPC6B | 15.2 | 4.33E-02  | -0.059 | 3  | 10.3 | Q2 |
| IPI00465261;I | ERAP2    | 13.9 | 9.47E-73  | -0.059 | 5  | 14.9 | Q2 |
| IPI00024620;I | ENY2     | 23.8 | 5.60E-07  | -0.058 | 4  | 6.6  | Q2 |
| IPI00012795;I | EIF3I    | 50.2 | 3.45E-132 | -0.058 | 12 | 7.7  | Q2 |
| IPI00910977;I | MPST     | 36   | 1.51E-144 | -0.058 | 4  | 5.3  | Q2 |
| IPI00025156;I | STUB1    | 31   | 5.12E-33  | -0.058 | 5  | 10.9 | Q2 |
| IPI00003856;I | ATP6V1E1 | 34.5 | 5.88E-50  | -0.058 | 11 | 10.2 | Q2 |
| IPI00010860;I | PSMD9    | 35.9 | 2.67E-67  | -0.057 | 9  | 11.5 | Q2 |
| IPI00020468;I | SELS     | 11.1 | 7.23E-07  | -0.057 | 2  | 17.0 | Q2 |
| IPI00021766;I | RTN4     | 8    | 1.63E-70  | -0.057 | 11 | 7.1  | Q2 |
| IPI00000875;I | EEF1G    | 44.4 | 2.22E-232 | -0.057 | 29 | 12.2 | Q2 |
| IPI00007175;I | NIP7     | 34.4 | 1.05E-44  | -0.057 | 4  | 11.0 | Q2 |
| IPI00218606;I | RPS23    | 29.4 | 5.55E-22  | -0.057 | 20 | 19.8 | Q2 |
| IPI00069750;I | PUF60    | 14.3 | 2.42E-21  | -0.057 | 2  | 14.3 | Q2 |
| IPI00025039;I | FBL      | 38.9 | 1.84E-109 | -0.057 | 10 | 19.5 | Q2 |
| IPI00643920;I | TKT      | 49.6 | <1.0E-304 | -0.056 | 45 | 8.9  | Q2 |
| IPI00009364;I | ORMDL1   | 4.6  | 7.73E-31  | -0.056 | 2  | 19.6 | Q2 |
| IPI00003925;I | PDHB     | 42.9 | 1.50E-242 | -0.056 | 15 | 13.2 | Q2 |
| IPI00299000;I | PA2G4    | 58.9 | 8.07E-269 | -0.056 | 16 | 11.6 | Q2 |

|               |          |      |           |        |    |      |    |
|---------------|----------|------|-----------|--------|----|------|----|
| IPI00844214;l | CTNNBL1  | 9.9  | 1.93E-14  | -0.056 | 2  | 14.8 | Q2 |
| IPI00023122;l | PDLIM7   | 16   | 1.34E-24  | -0.056 | 3  | 45.2 | Q2 |
| IPI00297261;F | PTPN1    | 35.9 | 4.86E-129 | -0.056 | 7  | 15.4 | Q2 |
| IPI00099871;l | MRPL40   | 16   | 2.10E-31  | -0.056 | 2  | 9.9  | Q2 |
| IPI00646015;l | ACOT9    | 28.8 | 7.47E-79  | -0.055 | 4  | 9.6  | Q2 |
| IPI00291238;l | FBLIM1   | 22.5 | 6.79E-99  | -0.055 | 5  | 17.5 | Q2 |
| IPI00024661;l | SEC24C   | 20.1 | 2.06E-160 | -0.055 | 3  | 13.8 | Q2 |
| IPI00479191;l | HNRNPH1  | 31.6 | 3.03E-230 | -0.054 | 20 | 9.3  | Q2 |
| IPI00375144;l | SRRT     | 11.5 | 2.11E-23  | -0.054 | 4  | 22.2 | Q2 |
| IPI00014198;l | EXOSC7   | 15.5 | 1.07E-44  | -0.054 | 4  | 13.4 | Q2 |
| IPI00438229;l | TRIM28   | 37   | <1.0E-304 | -0.054 | 8  | 8.5  | Q2 |
| IPI00410214;l | BPNT1    | 37.7 | 9.04E-237 | -0.054 | 5  | 4.3  | Q2 |
| IPI00028055;l | TMED10   | 32   | 6.27E-115 | -0.054 | 13 | 8.2  | Q2 |
| IPI00329696;l | FAM82B   | 21.3 | 1.42E-27  | -0.054 | 6  | 11.8 | Q2 |
| IPI00220835   | SEC61B   | 21.9 | 4.19E-05  | -0.054 | 4  | 9.3  | Q2 |
| IPI00027983   | CDA      | 46.6 | 5.95E-84  | -0.053 | 4  | 8.2  | Q2 |
| IPI00642816;l | SRP9     | 61.6 | 3.83E-17  | -0.053 | 11 | 8.9  | Q2 |
| IPI00010130;l | GLUL     | 7    | 1.09E-04  | -0.053 | 2  | 13.4 | Q2 |
| IPI00002525   | NENF     | 26.2 | 2.55E-32  | -0.053 | 4  | 9.4  | Q2 |
| IPI00006092;l | PMM2     | 46.7 | 5.34E-35  | -0.052 | 12 | 7.6  | Q2 |
| IPI00443909;l | CNPY2    | 31.3 | 7.66E-67  | -0.052 | 7  | 11.8 | Q2 |
| IPI00293464;l | DDB1     | 35.6 | 4.79E-237 | -0.052 | 10 | 25.3 | Q2 |
| IPI00872615   | C4orf3   | 16.7 | 1.00E-03  | -0.052 | 2  | 22.6 | Q2 |
| IPI00183603;l | OSTC     | 18.1 | 7.20E-21  | -0.052 | 7  | 9.1  | Q2 |
| IPI00013949;l | SGTA     | 32.9 | 5.65E-90  | -0.052 | 8  | 6.5  | Q2 |
| IPI00154975;l | DNAJC9   | 37.3 | 3.02E-52  | -0.052 | 6  | 6.4  | Q2 |
| IPI00299571;l | PDIA6    | 44.5 | <1.0E-304 | -0.051 | 15 | 37.3 | Q2 |
| IPI00140420;l | SND1     | 51.1 | <1.0E-304 | -0.051 | 26 | 9.8  | Q2 |
| IPI00011126;l | PSMC1    | 33   | 6.84E-203 | -0.051 | 9  | 11.6 | Q2 |
| IPI00022386;l | TXNDC9   | 21.2 | 1.01E-04  | -0.051 | 4  | 5.2  | Q2 |
| IPI00376025;l | DHRS4    | 6.8  | 3.89E-06  | -0.051 | 2  | 0.9  | Q2 |
| IPI00021435;l | PSMC2    | 52.7 | 1.08E-159 | -0.051 | 15 | 10.7 | Q2 |
| IPI00216008;l | G6PD     | 41.7 | 1.60E-144 | -0.051 | 22 | 13.5 | Q2 |
| IPI00303207   | ABCE1    | 30.2 | 1.34E-195 | -0.051 | 8  | 12.7 | Q2 |
| IPI00217468;l | HIST1H1B | 22.1 | 7.39E-53  | -0.051 | 21 | 21.0 | Q2 |

|               |         |      |           |        |    |      |    |
|---------------|---------|------|-----------|--------|----|------|----|
| IPI00375380;l | PSMD13  | 42.1 | 5.80E-176 | -0.050 | 13 | 12.7 | Q2 |
| IPI00021338;l | DLAT    | 15   | 3.14E-54  | -0.050 | 2  | 16.3 | Q2 |
| IPI00017184;l | EHD1    | 49.8 | 6.35E-202 | -0.050 | 16 | 9.7  | Q2 |
| IPI00032827   | SF3B14  | 60   | 3.00E-43  | -0.050 | 7  | 5.3  | Q2 |
| IPI00604759;l | FAHD1   | 14.5 | 1.96E-42  | -0.050 | 4  | 4.2  | Q2 |
| IPI00084571;l | MRPL39  | 18.7 | 6.29E-13  | -0.050 | 4  | 12.5 | Q2 |
| IPI00867714;l | LSM12   | 13.6 | 7.17E-29  | -0.049 | 2  | 3.7  | Q2 |
| IPI00020944;l | FDFT1   | 41   | 1.63E-204 | -0.049 | 9  | 22.5 | Q2 |
| IPI00023101;l | RQCD1   | 9.4  | 1.50E-18  | -0.049 | 3  | 14.4 | Q2 |
| IPI00016912   | TTC1    | 9.9  | 2.35E-07  | -0.049 | 3  | 24.0 | Q2 |
| IPI00012462;l | EIF2A   | 14   | 4.11E-33  | -0.048 | 3  | 6.7  | Q2 |
| IPI00019269;l | WDR61   | 18.7 | 8.51E-37  | -0.048 | 2  | 4.0  | Q2 |
| IPI00301489;l | UROD    | 10.1 | 1.19E-10  | -0.048 | 5  | 31.6 | Q2 |
| IPI00025796   | NDUFS3  | 40.9 | 9.39E-165 | -0.047 | 7  | 6.5  | Q2 |
| IPI00032498;l | DCTN5   | 20.9 | 3.19E-24  | -0.047 | 4  | 1.1  | Q2 |
| IPI00009236;l | CAV1    | 64.6 | 1.17E-143 | -0.047 | 22 | 5.8  | Q2 |
| IPI00384489   | AP1B1   | 13.7 | 2.12E-198 | -0.047 | 3  | 11.0 | Q2 |
| IPI00220416;l | UQCRB   | 45.9 | 1.65E-21  | -0.047 | 5  | 7.7  | Q2 |
| IPI00008167;l | ATP1B3  | 30.8 | 1.01E-87  | -0.046 | 6  | 9.3  | Q2 |
| IPI00001757;l | RBM8A   | 31.6 | 4.46E-57  | -0.046 | 4  | 7.5  | Q2 |
| IPI00007144;l | RPL26L1 | 11.7 | 1.53E-18  | -0.046 | 5  | 7.0  | Q2 |
| IPI00009960;l | IMMT    | 27.6 | 6.64E-247 | -0.045 | 10 | 21.7 | Q2 |
| IPI00793375;l | XPNPEP1 | 12   | 4.96E-64  | -0.045 | 3  | 10.1 | Q2 |
| IPI00009148;l | NUDT3   | 18   | 1.69E-07  | -0.045 | 3  | 10.5 | Q2 |
| IPI00029557;l | GRPEL1  | 42.4 | 9.92E-63  | -0.045 | 11 | 9.3  | Q2 |
| IPI00333215;l | TCEA1   | 28.6 | 1.61E-36  | -0.045 | 4  | 20.1 | Q2 |
| IPI00026167;l | NHP2L1  | 53.9 | 8.30E-60  | -0.045 | 14 | 8.6  | Q2 |
| IPI00413611;l | TOP1    | 25.2 | 1.32E-82  | -0.045 | 2  | 4.0  | Q2 |
| IPI00479786;l | KHSRP   | 32.5 | 6.42E-141 | -0.045 | 7  | 38.0 | Q2 |
| IPI00011770;l | NDUFA4  | 32.1 | 2.74E-09  | -0.044 | 4  | 9.2  | Q2 |
| IPI00009885;l | FKBP11  | 11.9 | 8.93E-09  | -0.044 | 2  | 8.7  | Q2 |
| IPI00029623;l | PSMA6   | 45.9 | 2.29E-93  | -0.044 | 15 | 56.5 | Q2 |
| IPI00792352;l | RAN     | 44.9 | 2.25E-164 | -0.044 | 30 | 9.1  | Q2 |
| IPI00003217;l | PSMB7   | 26   | 1.37E-25  | -0.044 | 11 | 7.2  | Q2 |
| IPI00926977;l | PSMC6   | 45.7 | 1.12E-200 | -0.044 | 8  | 9.5  | Q2 |

|               |         |      |           |        |    |      |    |
|---------------|---------|------|-----------|--------|----|------|----|
| IPI00328913;l | VPS28   | 37.3 | 3.54E-102 | -0.044 | 4  | 17.2 | Q2 |
| IPI00021290;l | ACLY    | 49   | <1.0E-304 | -0.044 | 31 | 38.6 | Q2 |
| IPI00152898;l | AP1S1   | 36.7 | 1.13E-70  | -0.043 | 6  | 8.0  | Q2 |
| IPI00306353   | DUSP23  | 38.7 | 4.33E-40  | -0.043 | 5  | 7.8  | Q2 |
| IPI00873622;l | WDR1    | 29.3 | 1.50E-158 | -0.043 | 10 | 7.7  | Q2 |
| IPI00641950;l | GNB2L1  | 68.2 | 8.87E-288 | -0.043 | 50 | 25.9 | Q2 |
| IPI00152981;l | ACAD9   | 8.7  | 5.38E-05  | -0.043 | 2  | 21.1 | Q2 |
| IPI00167030   | KRTCAP2 | 10.5 | 9.50E-11  | -0.043 | 4  | 15.2 | Q2 |
| IPI00554788;l | KRT18   | 72.3 | <1.0E-304 | -0.042 | 52 | 12.4 | Q2 |
| IPI00413641;l | AKR1B1  | 21.5 | 6.92E-11  | -0.042 | 9  | 9.0  | Q2 |
| IPI00147874;l | NANS    | 27.9 | 2.13E-61  | -0.042 | 3  | 8.8  | Q2 |
| IPI00893197;l | PPP2R4  | 17.7 | 8.32E-48  | -0.042 | 5  | 30.5 | Q2 |
| IPI00395939;l | PITPNB  | 59   | 3.11E-122 | -0.042 | 16 | 14.7 | Q2 |
| IPI00295889;l | SRP19   | 37.5 | 1.45E-70  | -0.042 | 5  | 15.0 | Q2 |
| IPI00220834;l | XRCC5   | 39.6 | 9.30E-246 | -0.042 | 20 | 13.6 | Q2 |
| IPI00016568;l | AK3L1   | 29.1 | 4.07E-15  | -0.042 | 4  | 8.6  | Q2 |
| IPI00910593;l | CNN2    | 50.3 | 9.31E-187 | -0.042 | 28 | 10.8 | Q2 |
| IPI00411706;l | ESD     | 41.8 | 1.06E-147 | -0.041 | 7  | 7.0  | Q2 |
| IPI00329036;l | MRPL50  | 15.2 | 1.88E-09  | -0.041 | 3  | 2.7  | Q2 |
| IPI00029468;l | ACTR1A  | 51.1 | <1.0E-304 | -0.041 | 9  | 8.8  | Q2 |
| IPI00001639;l | KPNB1   | 39.2 | <1.0E-304 | -0.040 | 21 | 8.7  | Q2 |
| IPI00012828;l | ACAA1   | 21   | 3.69E-110 | -0.040 | 2  | 17.1 | Q2 |
| IPI00003833   | MTCH2   | 48.2 | 5.74E-185 | -0.040 | 11 | 10.1 | Q2 |
| IPI00329331;l | UGP2    | 28.5 | 1.23E-206 | -0.040 | 4  | 4.0  | Q2 |
| IPI00012369;l | MAD2L1  | 24.9 | 2.46E-11  | -0.040 | 6  | 8.4  | Q2 |
| IPI00220219;l | COPB2   | 34.3 | 7.53E-275 | -0.040 | 11 | 9.0  | Q2 |
| IPI00031556;l | U2AF2   | 15.4 | 1.52E-98  | -0.040 | 6  | 6.2  | Q2 |
| IPI00470610;l | PYCR2   | 34.1 | 1.05E-73  | -0.040 | 4  | 7.3  | Q2 |
| IPI00873941;l | SEC61G  | 25   | 3.88E-14  | -0.039 | 5  | 9.7  | Q2 |
| IPI00655754;l | UFD1L   | 18.4 | 2.22E-87  | -0.039 | 5  | 10.3 | Q2 |
| IPI00000874;l | PRDX1   | 79.9 | 7.07E-180 | -0.039 | 52 | 18.1 | Q2 |
| IPI00000494;l | RPL5    | 44.8 | 2.42E-272 | -0.039 | 30 | 7.6  | Q2 |
| IPI00221093;l | RPS17   | 63   | 1.44E-204 | -0.039 | 19 | 13.5 | Q2 |
| IPI00105598;l | PSMD11  | 55.6 | 4.66E-218 | -0.039 | 17 | 11.3 | Q2 |
| IPI00329596;l | TMX2    | 12.1 | 1.17E-24  | -0.039 | 2  | 3.5  | Q2 |

|               |          |      |           |        |    |      |    |
|---------------|----------|------|-----------|--------|----|------|----|
| IPI00010153;l | RPL23    | 57.9 | 1.01E-193 | -0.038 | 36 | 9.4  | Q2 |
| IPI00074587;l | FUSIP1   | 21.8 | 1.76E-63  | -0.038 | 4  | 3.5  | Q2 |
| IPI00292140;l | CASP3    | 15.9 | 3.41E-16  | -0.038 | 5  | 6.1  | Q2 |
| IPI00643342;l | PEA15    | 27.8 | 2.53E-09  | -0.038 | 10 | 10.3 | Q2 |
| IPI00010105;l | EIF6     | 60   | 2.18E-295 | -0.038 | 16 | 6.5  | Q2 |
| IPI00216237;l | RPL36    | 37.1 | 4.63E-24  | -0.038 | 14 | 16.3 | Q2 |
| IPI00163505;l | RBM39    | 13.4 | 1.08E-70  | -0.037 | 4  | 33.5 | Q2 |
| IPI00026271;l | RPS14    | 39.7 | 1.85E-175 | -0.037 | 23 | 10.9 | Q2 |
| IPI00791262;l | ICT1     | 26.3 | 9.68E-23  | -0.037 | 3  | 19.8 | Q2 |
| IPI00221300;l | EIF2B1   | 29.5 | 4.79E-69  | -0.037 | 4  | 11.5 | Q2 |
| IPI00014197;l | CDV3     | 14   | 4.80E-37  | -0.037 | 6  | 3.4  | Q2 |
| IPI00413108;l | RPSA     | 61.3 | <1.0E-304 | -0.037 | 30 | 15.7 | Q2 |
| IPI00440703;l | GSTK1    | 29.8 | 4.08E-113 | -0.037 | 10 | 9.9  | Q2 |
| IPI00025366;l | CS       | 23.2 | 7.88E-81  | -0.037 | 9  | 14.4 | Q2 |
| IPI00011913   | HNRNPA0  | 30.8 | 3.20E-164 | -0.037 | 4  | 11.6 | Q2 |
| IPI00301419;l | COPS7A   | 16   | 1.83E-25  | -0.036 | 4  | 5.9  | Q2 |
| IPI00003482;l | DECR1    | 37.3 | 3.12E-97  | -0.036 | 8  | 8.4  | Q2 |
| IPI00000811;l | PSMB6    | 23.4 | 1.37E-21  | -0.036 | 10 | 17.0 | Q2 |
| IPI00177728;l | CNDP2    | 52.2 | <1.0E-304 | -0.036 | 11 | 11.0 | Q2 |
| IPI00872985;l | GAR1     | 20.2 | 2.35E-28  | -0.036 | 6  | 5.2  | Q2 |
| IPI00922223;l | ATP6V0D1 | 16.8 | 2.97E-49  | -0.036 | 6  | 7.4  | Q2 |
| IPI00412497;l | DYNLRB1  | 16.9 | 2.42E-21  | -0.036 | 3  | 7.5  | Q2 |
| IPI00295851   | COPB1    | 41.9 | <1.0E-304 | -0.036 | 16 | 15.8 | Q2 |
| IPI00103373   | CYGB     | 30   | 4.42E-24  | -0.036 | 8  | 9.1  | Q2 |
| IPI00413500;l | COMMD4   | 17.6 | 9.38E-14  | -0.035 | 2  | 2.1  | Q2 |
| IPI00007765;l | HSPA9    | 45.8 | <1.0E-304 | -0.035 | 27 | 12.0 | Q2 |
| IPI00009407   | DAD1     | 35.4 | 1.82E-29  | -0.035 | 7  | 12.6 | Q2 |
| IPI00478410;l | ATP5C1   | 31.5 | 1.64E-90  | -0.035 | 19 | 13.4 | Q2 |
| IPI00396485;l | EEF1A1   | 62.8 | <1.0E-304 | -0.035 | 99 | 13.8 | Q2 |
| IPI00217030;l | RPS4X    | 69.6 | 9.85E-198 | -0.035 | 37 | 8.3  | Q2 |
| IPI00001589   | TIMM13   | 73.7 | 1.84E-213 | -0.035 | 8  | 10.8 | Q2 |
| IPI00333068;l | ARPC1A   | 18.9 | 3.50E-30  | -0.035 | 2  | 11.8 | Q2 |
| IPI00008433;l | RPS5     | 45.6 | 6.02E-168 | -0.035 | 17 | 11.0 | Q2 |
| IPI00010427   | TMEM93   | 26.4 | 1.34E-11  | -0.035 | 5  | 22.1 | Q2 |
| IPI00749250;l | ACTR2    | 44.1 | 1.31E-232 | -0.034 | 11 | 13.4 | Q2 |



|               |          |      |           |        |    |      |    |
|---------------|----------|------|-----------|--------|----|------|----|
| IPI00465233;l | EIF3EIP  | 34.9 | 9.20E-221 | -0.034 | 11 | 11.1 | Q2 |
| IPI00328840;l | THOC4    | 34.1 | 2.01E-159 | -0.034 | 11 | 17.7 | Q2 |
| IPI00299573;l | RPL7A    | 50   | <1.0E-304 | -0.034 | 58 | 11.4 | Q2 |
| IPI00009680   | MRPL44   | 17.5 | 5.39E-48  | -0.034 | 3  | 6.2  | Q2 |
| IPI00219825;l | PSAP     | 8.9  | 1.01E-39  | -0.034 | 12 | 9.4  | Q2 |
| IPI00655650;l | RPS26    | 37.4 | 2.41E-47  | -0.034 | 11 | 8.2  | Q2 |
| IPI00301579   | NPC2     | 36.8 | 7.98E-78  | -0.034 | 14 | 5.2  | Q2 |
| IPI00292020   | SRM      | 39.4 | 9.90E-103 | -0.034 | 5  | 9.4  | Q2 |
| IPI00012268;l | PSMD2    | 44.4 | <1.0E-304 | -0.033 | 18 | 24.2 | Q2 |
| IPI00903286;l | SNRPD1   | 30.2 | 9.34E-37  | -0.033 | 3  | 6.7  | Q2 |
| IPI00003766   | ETHE1    | 51.2 | 7.33E-126 | -0.033 | 12 | 14.1 | Q2 |
| IPI00014587;l | CLTA     | 22.2 | 6.66E-79  | -0.033 | 5  | 20.9 | Q2 |
| IPI00014938;l | SARNP    | 31.9 | 5.09E-76  | -0.033 | 7  | 7.3  | Q2 |
| IPI00872668;l | NIT2     | 36.7 | 2.68E-154 | -0.033 | 10 | 17.3 | Q2 |
| IPI00219160;l | RPL34    | 37.6 | 1.66E-14  | -0.033 | 21 | 20.1 | Q2 |
| IPI00642971;l | EEF1D    | 26.1 | 1.69E-233 | -0.032 | 27 | 9.0  | Q2 |
| IPI00017334;l | PHB      | 60.3 | 4.16E-229 | -0.032 | 21 | 15.4 | Q2 |
| IPI00005719;l | RAB1A    | 70.2 | 7.18E-269 | -0.032 | 33 | 23.5 | Q2 |
| IPI00009841;l | EWSR1    | 5.3  | 5.52E-38  | -0.032 | 2  | 22.5 | Q2 |
| IPI00550689;l | C22orf28 | 23.2 | 5.57E-31  | -0.032 | 8  | 17.1 | Q2 |
| IPI00797126;l | NACA     | 7.8  | 1.45E-137 | -0.031 | 16 | 7.7  | Q2 |
| IPI00017726;l | HSD17B10 | 73.6 | <1.0E-304 | -0.031 | 21 | 8.1  | Q2 |
| IPI00003377;l | SFRS7    | 31.9 | 9.61E-56  | -0.031 | 10 | 11.8 | Q2 |
| IPI00003362;F | HSPA5    | 53.4 | <1.0E-304 | -0.031 | 90 | 13.2 | Q2 |
| IPI00795922;l | MRPS28   | 20.8 | 1.04E-09  | -0.031 | 4  | 14.2 | Q2 |
| IPI00641829;l | BAT1     | 39.3 | 2.24E-187 | -0.031 | 15 | 8.1  | Q2 |
| IPI00004416;l | CHMP2A   | 7.2  | 1.42E-04  | -0.030 | 5  | 12.6 | Q2 |
| IPI00004488   | ATP6V1F  | 15.1 | 6.33E-05  | -0.030 | 5  | 6.3  | Q2 |
| IPI00031617;l | C6orf125 | 15.9 | 8.96E-17  | -0.030 | 2  | 27.0 | Q2 |
| IPI00305010;l | CPPED1   | 7    | 4.28E-08  | -0.030 | 2  | 11.8 | Q2 |
| IPI00300096;l | RAB35    | 24.9 | 8.11E-33  | -0.030 | 6  | 12.5 | Q2 |
| IPI00002857;l | MAPK14   | 11.7 | 6.90E-18  | -0.029 | 4  | 4.9  | Q2 |
| IPI00009456;l | NT5E     | 26.8 | 7.55E-130 | -0.029 | 13 | 8.7  | Q2 |
| IPI00023919;l | PSMC5    | 52.2 | 1.07E-228 | -0.029 | 8  | 21.3 | Q2 |
| IPI00428288;l | MRPL43   | 42.1 | 1.25E-46  | -0.029 | 6  | 11.5 | Q2 |

|               |         |      |           |        |    |      |    |
|---------------|---------|------|-----------|--------|----|------|----|
| IPI00396435;l | DHX15   | 29.9 | 2.69E-114 | -0.029 | 12 | 16.8 | Q2 |
| IPI00021728;l | EIF2S2  | 40.5 | 2.04E-78  | -0.029 | 6  | 12.4 | Q2 |
| IPI00015897;l | CHORDC1 | 18.7 | 9.62E-62  | -0.029 | 2  | 7.7  | Q2 |
| IPI00221092;l | RPS16   | 69.9 | 2.09E-51  | -0.029 | 42 | 76.6 | Q2 |
| IPI00009368   | SFXN1   | 50   | 1.33E-106 | -0.029 | 9  | 16.5 | Q2 |
| IPI00102069;l | EIF3M   | 38   | 3.56E-224 | -0.028 | 7  | 4.9  | Q2 |
| IPI00024933;l | RPL12   | 71.5 | 8.86E-262 | -0.028 | 24 | 11.8 | Q2 |
| IPI00549381   | MRPL1   | 24.3 | 1.40E-80  | -0.028 | 4  | 12.7 | Q2 |
| IPI00027032;l | LYPLA2  | 29.4 | 5.46E-48  | -0.028 | 3  | 7.3  | Q2 |
| IPI00788907;l | PGAM5   | 42.2 | 1.09E-59  | -0.028 | 14 | 7.0  | Q2 |
| IPI00026105;l | SCP2    | 17.6 | 2.21E-62  | -0.028 | 26 | 47.1 | Q2 |
| IPI00019495;l | DYNLT1  | 23   | 2.85E-29  | -0.027 | 3  | 4.7  | Q2 |
| IPI00215884;l | SFRS1   | 51.2 | 1.90E-137 | -0.027 | 28 | 8.9  | Q2 |
| IPI00030275;l | TRAP1   | 25.3 | 5.49E-195 | -0.027 | 6  | 20.9 | Q2 |
| IPI00296022;l | UQCRH   | 25.3 | 2.31E-03  | -0.027 | 7  | 8.8  | Q2 |
| IPI00010438;l | SNAP23  | 31.8 | 1.03E-48  | -0.027 | 6  | 15.5 | Q2 |
| IPI00291419   | ACAT2   | 38   | 2.31E-264 | -0.027 | 17 | 13.8 | Q2 |
| IPI00013297;l | PDAP1   | 37.6 | 2.14E-108 | -0.026 | 13 | 12.4 | Q2 |
| IPI00012442;l | G3BP1   | 39.7 | 3.23E-263 | -0.026 | 14 | 6.7  | Q2 |
| IPI00010740;l | SFPQ    | 45.3 | <1.0E-304 | -0.026 | 18 | 8.0  | Q2 |
| IPI00059292;l | MAGOHB  | 35.8 | 3.36E-26  | -0.026 | 4  | 6.0  | Q2 |
| IPI00218848   | ATP5I   | 40.3 | 8.02E-05  | -0.026 | 11 | 10.4 | Q2 |
| IPI00013184;l | ARD1A   | 24.7 | 3.58E-28  | -0.026 | 4  | 5.1  | Q2 |
| IPI00221089   | RPS13   | 51   | 1.15E-62  | -0.026 | 24 | 15.6 | Q2 |
| IPI00793201;l | AIMP1   | 17.3 | 1.53E-25  | -0.026 | 5  | 13.3 | Q2 |
| IPI00215965;l | HNRNPA1 | 54.3 | <1.0E-304 | -0.025 | 47 | 11.4 | Q2 |
| IPI00555744;l | RPL14   | 37.7 | 2.22E-147 | -0.025 | 25 | 8.6  | Q2 |
| IPI00916503;l | BZW1    | 33.9 | 1.19E-54  | -0.025 | 14 | 13.0 | Q2 |
| IPI00465211;l | WDR92   | 4.4  | 1.83E-27  | -0.025 | 4  | 9.1  | Q2 |
| IPI00873253;l | SEC11A  | 17.1 | 9.45E-21  | -0.025 | 6  | 7.4  | Q2 |
| IPI00784366;l | AP2B1   | 34.8 | 1.51E-300 | -0.025 | 14 | 8.8  | Q2 |
| IPI00420108;l | DLST    | 19.6 | 1.87E-68  | -0.025 | 7  | 4.8  | Q2 |
| IPI00291006;l | MDH2    | 65.7 | <1.0E-304 | -0.025 | 28 | 7.1  | Q2 |
| IPI00011253;l | RPS3    | 80.7 | 3.82E-225 | -0.024 | 50 | 26.9 | Q2 |
| IPI00005161;l | ARPC2   | 47   | 7.02E-99  | -0.024 | 15 | 12.9 | Q2 |

|               |          |      |           |        |    |      |    |
|---------------|----------|------|-----------|--------|----|------|----|
| IPI00472171;l | RPL7     | 59.5 | 1.16E-104 | -0.024 | 32 | 20.4 | Q2 |
| IPI00024911;l | ERP29    | 47.5 | 1.43E-121 | -0.024 | 12 | 12.3 | Q2 |
| IPI00013862;l | DTYMK    | 63.2 | 1.96E-59  | -0.024 | 11 | 11.5 | Q2 |
| IPI00219018;l | GAPDH    | 74.6 | <1.0E-304 | -0.024 | 91 | 13.5 | Q2 |
| IPI00472939;l | SPCS2    | 49.8 | 5.22E-188 | -0.024 | 8  | 3.8  | Q2 |
| IPI00001541   | TIMM9    | 77.5 | 6.07E-28  | -0.023 | 6  | 7.6  | Q2 |
| IPI00026689;l | CDC2     | 58.7 | 4.14E-152 | -0.023 | 7  | 17.4 | Q2 |
| IPI00478231;l | RHOA     | 59.6 | 4.08E-243 | -0.023 | 36 | 16.6 | Q2 |
| IPI00013195;l | MRPL49   | 38.6 | 5.24E-57  | -0.023 | 4  | 11.4 | Q2 |
| IPI00006579;l | COX4I1   | 32.5 | 2.87E-34  | -0.023 | 23 | 18.2 | Q2 |
| IPI00027993   | RAB25    | 19.2 | 5.10E-23  | -0.023 | 3  | 9.8  | Q2 |
| IPI00020042;l | PSMC4    | 31.8 | 1.09E-173 | -0.023 | 6  | 17.6 | Q2 |
| IPI00152658;l | NEK7     | 16.2 | 3.63E-09  | -0.023 | 2  | 21.7 | Q2 |
| IPI00013683;l | TUBB3    | 18.9 | <1.0E-304 | -0.023 | 12 | 9.9  | Q2 |
| IPI00031169;l | RAB2A    | 67   | 1.39E-184 | -0.023 | 24 | 14.2 | Q2 |
| IPI00642984;l | BCAP31   | 25.9 | 3.92E-62  | -0.022 | 21 | 86.8 | Q2 |
| IPI00176903;l | PTRF     | 22.3 | 6.86E-246 | -0.022 | 14 | 11.4 | Q2 |
| IPI00010204;l | SFRS3    | 27.4 | 6.91E-47  | -0.022 | 9  | 8.5  | Q2 |
| IPI00412607;l | RPL35    | 39   | 4.31E-14  | -0.022 | 9  | 12.2 | Q2 |
| IPI00027798   | FAM103A1 | 14.4 | 3.23E-04  | -0.022 | 2  | 1.7  | Q2 |
| IPI00017375;l | SEC23A   | 20.8 | 3.48E-203 | -0.022 | 5  | 5.5  | Q2 |
| IPI00009010;l | AD       | 38.4 | 2.45E-65  | -0.022 | 9  | 12.8 | Q2 |
| IPI00216965;l | GOSR2    | 13.1 | 4.53E-09  | -0.022 | 2  | 10.4 | Q2 |
| IPI00010720;l | CCT5     | 50.1 | 2.96E-275 | -0.021 | 20 | 12.0 | Q2 |
| IPI00011416;l | ECH1     | 24.7 | 1.92E-118 | -0.021 | 6  | 7.2  | Q2 |
| IPI00033143   | EIF3K    | 34.4 | 5.83E-118 | -0.021 | 2  | 8.2  | Q2 |
| IPI00024662   | CBX5     | 31.9 | 2.31E-98  | -0.021 | 4  | 2.8  | Q2 |
| IPI00003326;l | ARL2     | 23.9 | 6.90E-33  | -0.021 | 5  | 11.7 | Q2 |
| IPI00024920   | ATP5D    | 26.2 | 2.65E-56  | -0.021 | 8  | 7.2  | Q2 |
| IPI00014808   | PAFAH1B3 | 14.7 | 9.47E-07  | -0.021 | 4  | 9.4  | Q2 |
| IPI00921428;l | IMPA1    | 16.1 | 5.46E-32  | -0.021 | 5  | 8.1  | Q2 |
| IPI00216057;l | SORD     | 31.7 | 1.81E-113 | -0.020 | 5  | 17.9 | Q2 |
| IPI00554705;l | DCTD     | 51.9 | 1.48E-90  | -0.020 | 6  | 10.2 | Q2 |
| IPI00220271;l | AKR1A1   | 58.5 | 6.07E-241 | -0.020 | 12 | 11.0 | Q2 |
| IPI00789155;l | CALU     | 41.5 | 9.16E-130 | -0.020 | 5  | 5.3  | Q2 |

|               |         |      |           |        |    |      |    |
|---------------|---------|------|-----------|--------|----|------|----|
| IPI00003865;l | HSPA8   | 65   | <1.0E-304 | -0.020 | 87 | 20.1 | Q2 |
| IPI00028091;l | ACTR3   | 56   | 9.02E-206 | -0.020 | 17 | 12.8 | Q2 |
| IPI00024670;l | REEP5   | 20.6 | 3.82E-36  | -0.019 | 10 | 6.8  | Q2 |
| IPI00909853;l | DDT     | 18.4 | 1.81E-46  | -0.019 | 4  | 6.0  | Q2 |
| IPI00181728   | BXDC2   | 21.2 | 2.10E-88  | -0.019 | 3  | 3.7  | Q2 |
| IPI00146447;l | VMA21   | 21.8 | 1.05E-03  | -0.019 | 3  | 5.6  | Q2 |
| IPI00303882;l | M6PRBP1 | 46.3 | <1.0E-304 | -0.019 | 21 | 17.3 | Q2 |
| IPI00033025;l | SEPT7   | 26.3 | 1.41E-196 | -0.019 | 11 | 11.5 | Q2 |
| IPI00412987;l | GMFB    | 34.4 | 5.58E-73  | -0.018 | 4  | 2.8  | Q2 |
| IPI00022421;l | COX7A2L | 33.3 | 3.58E-17  | -0.018 | 4  | 7.5  | Q2 |
| IPI00026216;l | NPEPPS  | 28.4 | 3.89E-130 | -0.018 | 17 | 13.5 | Q2 |
| IPI00894340;l | 40423   | 34.9 | 2.43E-192 | -0.018 | 8  | 10.6 | Q2 |
| IPI00014589;l | CLTB    | 31.4 | 7.32E-16  | -0.018 | 9  | 6.0  | Q2 |
| IPI00647286;l | C9orf88 | 30.6 | 3.63E-228 | -0.018 | 12 | 21.1 | Q2 |
| IPI00030702;l | IDH3A   | 40.7 | 9.95E-126 | -0.018 | 15 | 13.5 | Q2 |
| IPI00644079;l | HNRNPU  | 36.1 | <1.0E-304 | -0.018 | 15 | 8.0  | Q2 |
| IPI00025091   | RPS11   | 62   | 6.54E-75  | -0.017 | 31 | 38.5 | Q2 |
| IPI00291922   | PSMA5   | 52.3 | 7.20E-192 | -0.017 | 16 | 8.4  | Q2 |
| IPI00883896;l | LIMA1   | 41.6 | 1.65E-302 | -0.017 | 22 | 11.0 | Q2 |
| IPI00827508;l | RPL10A  | 53.4 | 7.23E-214 | -0.017 | 32 | 11.3 | Q2 |
| IPI00017895;l | GPD2    | 26   | 4.40E-110 | -0.016 | 4  | 6.1  | Q2 |
| IPI00871585;l | BID     | 25.3 | 3.40E-42  | -0.016 | 3  | 6.1  | Q2 |
| IPI00793443;l | IPO5    | 39.9 | <1.0E-304 | -0.016 | 14 | 10.0 | Q2 |
| IPI00010201;l | PSMD8   | 20.3 | 9.60E-42  | -0.016 | 6  | 10.3 | Q2 |
| IPI00746655;l | FAM62A  | 32.9 | <1.0E-304 | -0.016 | 15 | 11.1 | Q2 |
| IPI00294472;l | TMED5   | 21.4 | 1.82E-36  | -0.016 | 8  | 24.3 | Q2 |
| IPI00216746;l | HNRNPK  | 48.9 | <1.0E-304 | -0.016 | 43 | 13.7 | Q2 |
| IPI00298961;l | XPO1    | 37   | <1.0E-304 | -0.015 | 9  | 15.3 | Q2 |
| IPI00016610   | PCBP1   | 39   | 1.53E-254 | -0.015 | 27 | 11.7 | Q2 |
| IPI00028888;l | HNRNPD  | 23.7 | 9.63E-134 | -0.015 | 12 | 6.0  | Q2 |
| IPI00015842   | RCN1    | 14.5 | 7.33E-61  | -0.014 | 2  | 0.1  | Q2 |
| IPI00304612;l | RPL13A  | 49.3 | 5.33E-72  | -0.014 | 36 | 9.3  | Q2 |
| IPI00442073;l | CSRP1   | 55.4 | 1.29E-128 | -0.014 | 11 | 9.4  | Q2 |
| IPI00295741;l | CTSB    | 25.4 | 6.00E-103 | -0.014 | 16 | 12.5 | Q2 |
| IPI00028006;l | PSMB2   | 35.3 | 3.60E-82  | -0.013 | 7  | 8.5  | Q2 |

|               |         |      |           |        |    |      |    |
|---------------|---------|------|-----------|--------|----|------|----|
| IPI00014230;l | C1QBP   | 26.2 | 3.62E-162 | -0.013 | 8  | 14.5 | Q2 |
| IPI00894395;l | PSMB9   | 14.2 | 3.57E-22  | -0.013 | 3  | 1.5  | Q2 |
| IPI00554681;l | NDUFA5  | 16.4 | 1.63E-11  | -0.013 | 3  | 17.1 | Q2 |
| IPI00016249;l | FXR1    | 11.6 | 1.42E-31  | -0.013 | 2  | 10.3 | Q2 |
| IPI00072377;l | SET     | 32.8 | 1.25E-114 | -0.013 | 18 | 10.9 | Q2 |
| IPI00011268;l | RALY    | 34.2 | 3.29E-49  | -0.013 | 20 | 11.5 | Q2 |
| IPI00300567;l | DCI     | 16.9 | 4.35E-46  | -0.013 | 6  | 9.7  | Q2 |
| IPI00015866;l | ARL2BP  | 5.5  | 7.47E-08  | -0.013 | 2  | 10.5 | Q2 |
| IPI00872177;l | PPP1CB  | 14.4 | 9.77E-282 | -0.013 | 4  | 5.8  | Q2 |
| IPI00006211;l | VAPB    | 30.9 | 2.35E-72  | -0.013 | 7  | 10.8 | Q2 |
| IPI00472442;l | PSMA1   | 47.6 | 1.28E-105 | -0.012 | 18 | 6.0  | Q2 |
| IPI00376798;l | RPL11   | 46.1 | 2.73E-58  | -0.012 | 24 | 13.0 | Q2 |
| IPI00479306;l | PSMB5   | 42.2 | 1.00E-111 | -0.012 | 12 | 35.9 | Q2 |
| IPI00334713;l | HNRNPAB | 38.6 | 1.36E-124 | -0.012 | 18 | 12.2 | Q2 |
| IPI00183626;l | PTBP1   | 36.3 | <1.0E-304 | -0.012 | 21 | 8.9  | Q2 |
| IPI00218071   | HS3ST5  | 2.9  | 4.67E-02  | -0.012 | 2  | 1.1  | Q2 |
| IPI00289499;l | ATIC    | 52   | <1.0E-304 | -0.012 | 16 | 11.9 | Q2 |
| IPI00884105;l | LAMP1   | 12.2 | 2.43E-59  | -0.012 | 3  | 15.8 | Q2 |
| IPI00018206;l | GOT2    | 47.7 | 1.95E-215 | -0.012 | 20 | 11.0 | Q2 |
| IPI00017344;l | RAB5B   | 24.2 | 9.37E-80  | -0.012 | 5  | 13.2 | Q2 |
| IPI00010796;l | P4HB    | 56.5 | 6.12E-209 | -0.012 | 45 | 10.6 | Q2 |
| IPI00003519;l | EFTUD2  | 27.5 | <1.0E-304 | -0.011 | 6  | 10.8 | Q2 |
| IPI00290142;l | CTPS    | 40.1 | 1.10E-213 | -0.011 | 8  | 17.5 | Q2 |
| IPI00873222;l | CCT4    | 55.8 | <1.0E-304 | -0.011 | 28 | 11.7 | Q2 |
| IPI00456008;l | ATP5J   | 28.4 | 1.09E-57  | -0.011 | 4  | 4.8  | Q2 |
| IPI00008164   | PREP    | 28.5 | <1.0E-304 | -0.011 | 4  | 17.3 | Q2 |
| IPI00395887;l | TMX1    | 22.5 | 4.23E-45  | -0.011 | 8  | 5.5  | Q2 |
| IPI00419373;l | HNRNPA3 | 31.5 | 8.85E-218 | -0.011 | 12 | 8.9  | Q2 |
| IPI00216048;l | PITPNA  | 28.5 | 6.15E-24  | -0.011 | 4  | 5.6  | Q2 |
| IPI00847342;C | KRT7    | 56.1 | <1.0E-304 | -0.011 | 73 | 11.7 | Q2 |
| IPI00100160;l | CAND1   | 36.7 | <1.0E-304 | -0.010 | 14 | 6.6  | Q2 |
| IPI00853201;l | MRPL23  | 27.2 | 1.46E-33  | -0.010 | 2  | 3.1  | Q2 |
| IPI00002968   | MOCS2   | 21.6 | 1.81E-02  | -0.010 | 4  | 1.5  | Q2 |
| IPI00871870;l | ARPC3   | 46.1 | 5.45E-81  | -0.010 | 19 | 8.7  | Q2 |
| IPI00290566;l | CCT1    | 54   | <1.0E-304 | -0.010 | 23 | 12.1 | Q2 |

|               |        |      |           |        |    |      |    |
|---------------|--------|------|-----------|--------|----|------|----|
| IPI00909484;I | CDC42  | 28.8 | 2.14E-58  | -0.010 | 7  | 20.5 | Q2 |
| IPI00477686;I | GTF2F2 | 10.4 | 1.36E-09  | -0.010 | 3  | 4.7  | Q2 |
| IPI00005158;I | LONP1  | 9.9  | 1.12E-52  | -0.010 | 2  | 1.1  | Q2 |
| IPI00456758   | RPL27A | 44.6 | 7.62E-46  | -0.010 | 27 | 15.8 | Q2 |
| IPI00290460;I | EIF3G  | 35   | 1.32E-88  | -0.010 | 3  | 3.9  | Q2 |
| IPI00027252;I | PHB2   | 68.2 | 3.96E-258 | -0.010 | 20 | 11.7 | Q2 |
| IPI00013415;I | RPS7   | 49.5 | 1.71E-63  | -0.009 | 17 | 7.4  | Q2 |
| IPI00020965;I | UBE2H  | 26.8 | 1.10E-27  | -0.009 | 3  | 6.6  | Q2 |
| IPI00903255;I | OSTF1  | 43   | 4.87E-120 | -0.009 | 5  | 9.0  | Q2 |
| IPI00748502;I | CRTAP  | 11.5 | 1.80E-26  | -0.009 | 3  | 10.8 | Q2 |
| IPI00017448;I | RPS21  | 63.9 | 2.90E-54  | -0.009 | 23 | 13.9 | Q2 |
| IPI00009104;I | RUVBL2 | 43.2 | 3.26E-274 | -0.009 | 9  | 2.8  | Q2 |
| IPI00440493;I | ATP5A1 | 56.1 | <1.0E-304 | -0.009 | 43 | 6.0  | Q2 |
| IPI00032808;I | RAB3D  | 18.7 | 6.97E-77  | -0.009 | 6  | 12.4 | Q2 |
| IPI00465361;I | RPL13  | 46   | 1.57E-41  | -0.008 | 30 | 27.0 | Q2 |
| IPI00030116;I | PGM3   | 8.9  | 7.12E-12  | -0.008 | 5  | 13.1 | Q2 |
| IPI00031583;F | USO1   | 19.6 | 3.10E-157 | -0.008 | 9  | 11.5 | Q2 |
| IPI00217357   | CCAR1  | 11.4 | 5.79E-116 | -0.008 | 2  | 3.5  | Q2 |
| IPI00185374;I | PSMD12 | 36   | 7.56E-154 | -0.008 | 14 | 10.1 | Q2 |
| IPI00646304;I | PPIB   | 58.8 | 7.04E-175 | -0.008 | 34 | 8.7  | Q2 |
| IPI00024919;I | PRDX3  | 30.9 | 4.07E-89  | -0.008 | 9  | 7.6  | Q2 |
| IPI00011285;I | CAPN1  | 33.9 | 5.06E-140 | -0.008 | 19 | 11.4 | Q2 |
| IPI00306960;I | NARS   | 32.7 | 8.67E-177 | -0.008 | 11 | 7.8  | Q2 |
| IPI00017451;I | SF3A1  | 21.4 | 1.70E-101 | -0.008 | 4  | 4.9  | Q2 |
| IPI00010182;I | DBI    | 51.7 | 2.73E-11  | -0.008 | 4  | 9.1  | Q2 |
| IPI00027626;I | CCT6A  | 51.4 | 1.68E-297 | -0.007 | 21 | 9.4  | Q2 |
| IPI00411680;I | PCMT1  | 52.6 | 4.68E-220 | -0.007 | 8  | 20.0 | Q2 |
| IPI00872430;I | RPS8   | 55.8 | 9.10E-173 | -0.007 | 35 | 10.9 | Q2 |
| IPI00025273;I | GART   | 37.5 | <1.0E-304 | -0.007 | 15 | 8.8  | Q2 |
| IPI00002745;I | CTSZ   | 15.8 | 8.77E-41  | -0.006 | 5  | 9.0  | Q2 |
| IPI00005511   | PHF5A  | 40.9 | 6.68E-28  | -0.006 | 8  | 12.4 | Q2 |
| IPI00001661;I | RCC1   | 21.7 | 2.71E-100 | -0.006 | 2  | 2.3  | Q2 |
| IPI00448095;I | DCXR   | 23.8 | 2.50E-20  | -0.006 | 3  | 9.8  | Q2 |
| IPI00029267   | SNRPB2 | 31.6 | 2.15E-17  | -0.006 | 8  | 12.9 | Q2 |
| IPI00021187;I | RUVBL1 | 48.2 | 2.74E-293 | -0.006 | 13 | 6.9  | Q2 |

|               |               |      |           |        |     |      |    |
|---------------|---------------|------|-----------|--------|-----|------|----|
| IPI00449197;I | GMPR2         | 14.9 | 5.73E-11  | -0.006 | 7   | 9.7  | Q2 |
| IPI00032872;I | MRPS16        | 34.3 | 2.59E-20  | -0.005 | 3   | 4.4  | Q2 |
| IPI00300725;C | KRT6A         | 67.4 | <1.0E-304 | -0.005 | 324 | 30.2 | Q2 |
| IPI00007089   | TINP1         | 15.8 | 8.71E-10  | -0.005 | 3   | 16.5 | Q2 |
| IPI00014577;I | RAB18         | 51   | 9.01E-144 | -0.005 | 11  | 11.9 | Q2 |
| IPI00909195;I | HN1L          | 36.2 | 1.37E-111 | -0.005 | 5   | 13.9 | Q2 |
| IPI00298520;I | ARCN1         | 27.9 | 1.44E-89  | -0.005 | 13  | 11.5 | Q2 |
| IPI00297492;I | STT3A         | 9.4  | 1.15E-24  | -0.005 | 5   | 3.4  | Q2 |
| IPI00063827;I | ABHD14B       | 44.3 | 3.06E-76  | -0.005 | 6   | 17.0 | Q2 |
| IPI00219446;I | PEBP1         | 79.7 | 2.97E-304 | -0.005 | 13  | 9.5  | Q2 |
| IPI00025252;I | PDIA3         | 61.2 | <1.0E-304 | -0.005 | 36  | 8.9  | Q2 |
| IPI00413344;I | CFL2          | 37.3 | 8.10E-127 | -0.005 | 5   | 13.0 | Q2 |
| IPI00550032;I | RP11          | 53.4 | 2.54E-80  | -0.005 | 20  | 12.5 | Q2 |
| IPI00020008;I | NEDD8         | 28.4 | 1.73E-22  | -0.005 | 7   | 6.2  | Q2 |
| IPI00016405;I | OCIAD1        | 19.6 | 5.66E-21  | -0.004 | 4   | 5.7  | Q2 |
| IPI00427330;I | SBDS          | 51.2 | 2.42E-89  | -0.004 | 17  | 9.6  | Q2 |
| IPI00009328;I | EIF4A3        | 31.4 | 1.36E-118 | -0.004 | 8   | 14.9 | Q2 |
| IPI00020928;I | TFAM          | 22.4 | 2.65E-28  | -0.004 | 3   | 4.5  | Q2 |
| IPI00010157;I | MAT2A         | 32.9 | 7.63E-205 | -0.004 | 2   | 6.4  | Q2 |
| IPI00386189;I | NARG1         | 32.4 | 3.90E-120 | -0.004 | 13  | 17.9 | Q2 |
| IPI00395627;I | CACYBP        | 58.3 | 4.86E-121 | -0.004 | 11  | 11.1 | Q2 |
| IPI00010080;I | OXSRI         | 20.3 | 4.23E-179 | -0.003 | 5   | 11.1 | Q2 |
| IPI00009374   | GSKIP         | 15.1 | 3.65E-05  | -0.003 | 2   | 1.7  | Q2 |
| IPI00031691;I | RPL9          | 56.8 | 4.87E-157 | -0.003 | 16  | 13.1 | Q2 |
| IPI00014238;I | KARS          | 30.8 | 5.46E-97  | -0.003 | 11  | 16.4 | Q2 |
| IPI00815732   | DKFZp781N1372 | 45.1 | 3.53E-150 | -0.003 | 14  | 6.7  | Q2 |
| IPI00295992;I | ATAD3A        | 18.9 | 2.64E-56  | -0.003 | 6   | 8.8  | Q2 |
| IPI00300074   | FARSB         | 37   | 2.11E-109 | -0.002 | 14  | 13.2 | Q2 |
| IPI00171438;I | TXNDC5        | 23.1 | 1.93E-63  | -0.002 | 10  | 83.6 | Q2 |
| IPI00301936;I | ELAVL1        | 31.7 | 1.37E-111 | -0.002 | 12  | 7.7  | Q2 |
| IPI00022774;I | VCP           | 57.2 | <1.0E-304 | -0.002 | 50  | 9.2  | Q2 |
| IPI00411705;I | CLLD6         | 18.4 | 1.27E-09  | -0.002 | 4   | 6.1  | Q2 |
| IPI00060627   | CCDC124       | 35.9 | 2.54E-105 | -0.002 | 11  | 4.7  | Q2 |
| IPI00550917;I | TWF2          | 46.1 | 4.33E-129 | -0.002 | 12  | 8.9  | Q2 |
| IPI00219445;I | PSME3         | 43.8 | 9.47E-133 | -0.002 | 12  | 11.8 | Q2 |

|               |        |      |           |        |    |      |    |
|---------------|--------|------|-----------|--------|----|------|----|
| IPI00410631;l | FAM45A | 13.4 | 5.62E-09  | -0.002 | 2  | 6.4  | Q2 |
| IPI00012197   | DCTPP1 | 44.1 | 5.30E-63  | -0.002 | 6  | 10.6 | Q2 |
| IPI00887241;l | RPS28  | 35.2 | 1.42E-29  | -0.002 | 12 | 6.8  | Q2 |
| IPI00061531;l | MRPL53 | 41.1 | 3.32E-40  | -0.001 | 4  | 18.1 | Q2 |
| IPI00289876;l | STX7   | 29.5 | 6.09E-81  | -0.001 | 4  | 12.0 | Q2 |
| IPI00639982;l | DYNLT3 | 10.5 | 6.99E-14  | -0.001 | 3  | 9.8  | Q2 |
| IPI00016372;l | RAB9A  | 12.4 | 1.23E-05  | -0.001 | 2  | 13.6 | Q2 |
| IPI00023161;l | MRPL46 | 24   | 8.73E-57  | -0.001 | 5  | 11.2 | Q2 |
| IPI00029629   | TRIM25 | 21.7 | 7.30E-143 | -0.001 | 8  | 25.4 | Q2 |
| IPI00215780;l | RPS19  | 69   | 3.98E-54  | -0.001 | 29 | 13.6 | Q2 |
| IPI00010404   | SF3B5  | 37.2 | 2.26E-35  | 0.000  | 9  | 8.2  | Q2 |
| IPI00219029;l | GOT1   | 41.2 | 5.06E-147 | 0.000  | 5  | 16.6 | Q2 |
| IPI00008599;l | EBP    | 16.5 | 7.53E-21  | 0.000  | 4  | 1.6  | Q2 |
| IPI00295857;l | COPA   | 46.5 | <1.0E-304 | 0.000  | 2  | 1.6  | Q2 |
| IPI00011916;l | AIMP2  | 17.5 | 2.23E-87  | 0.000  | 4  | 9.5  | Q2 |
| IPI00465248;l | ENO1   | 69.8 | <1.0E-304 | 0.000  | 93 | 11.8 | Q2 |
| IPI00005050   | MRPS14 | 28.9 | 1.19E-35  | 0.000  | 4  | 21.0 | Q2 |
| IPI00419979;l | PAK2   | 14.1 | 2.14E-41  | 0.000  | 6  | 6.1  | Q2 |
| IPI00007611;l | ATP5O  | 70   | 7.79E-273 | 0.000  | 13 | 6.0  | Q2 |
| IPI00011876;l | MTAP   | 60.3 | 2.42E-266 | 0.000  | 14 | 12.4 | Q2 |
| IPI00027223;l | IDH1   | 44.2 | 1.10E-236 | 0.000  | 14 | 10.7 | Q2 |
| IPI00926903;l | CHCHD3 | 33.6 | 2.22E-87  | 0.000  | 7  | 7.9  | Q2 |
| IPI00748145;l | GNAI2  | 49   | 1.43E-188 | 0.000  | 19 | 13.8 | Q2 |
| IPI00027834;l | HNRNPL | 42.8 | 1.64E-254 | 0.001  | 14 | 12.7 | Q2 |
| IPI00220487;l | ATP5H  | 78.3 | 5.66E-142 | 0.001  | 6  | 11.0 | Q2 |
| IPI00305064;l | CD44   | 8    | 1.28E-74  | 0.001  | 15 | 14.0 | Q2 |
| IPI00011274;l | HNRPDL | 18.8 | 4.52E-171 | 0.001  | 13 | 12.7 | Q2 |
| IPI00007019   | PPIL1  | 20.5 | 3.98E-55  | 0.002  | 4  | 19.0 | Q2 |
| IPI00025277   | PDCD6  | 44   | 5.53E-47  | 0.002  | 8  | 11.9 | Q2 |
| IPI00784154;l | HSPD1  | 61.6 | <1.0E-304 | 0.002  | 31 | 7.9  | Q2 |
| IPI00218493;l | HPRT1  | 49.5 | 1.58E-129 | 0.002  | 10 | 15.4 | Q2 |
| IPI00925713;l | RPL10  | 54.3 | 1.96E-97  | 0.002  | 32 | 10.1 | Q2 |
| IPI00012750;l | RPS25  | 35.2 | 1.89E-26  | 0.002  | 16 | 7.4  | Q2 |
| IPI00032439;l | POLR1D | 28.6 | 3.69E-28  | 0.002  | 2  | 8.3  | Q2 |
| IPI00299088;l | BAIAP2 | 21.7 | 1.86E-38  | 0.002  | 4  | 3.2  | Q2 |



|               |          |      |           |       |    |      |    |
|---------------|----------|------|-----------|-------|----|------|----|
| IPI00219871;l | LSM8     | 37.5 | 5.00E-17  | 0.002 | 5  | 14.0 | Q2 |
| IPI00021167;l | PRKRA    | 8    | 1.03E-31  | 0.002 | 2  | 7.2  | Q2 |
| IPI00014263   | EIF4H    | 53.6 | 5.68E-157 | 0.002 | 24 | 8.2  | Q2 |
| IPI00027270;l | RPL26    | 40   | 5.90E-19  | 0.002 | 42 | 14.0 | Q2 |
| IPI00179330;l | RPS27A   | 64.7 | 4.32E-127 | 0.002 | 95 | 9.0  | Q2 |
| IPI00041325;l | NHP2     | 37.9 | 1.32E-92  | 0.002 | 8  | 9.4  | Q2 |
| IPI00174852;l | MED20    | 14.6 | 1.85E-05  | 0.003 | 2  | 1.3  | Q2 |
| IPI00015891   | PFDN4    | 32.8 | 5.43E-41  | 0.003 | 4  | 24.9 | Q2 |
| IPI00290204;l | SNRNP70  | 19.7 | 5.85E-14  | 0.003 | 6  | 15.5 | Q2 |
| IPI00247583;l | RPL21    | 42.5 | 1.45E-89  | 0.003 | 13 | 19.2 | Q2 |
| IPI00017963;l | SNRPD2   | 67.8 | 3.14E-93  | 0.003 | 21 | 7.8  | Q2 |
| IPI00217465;l | HIST1H1C | 40.8 | 5.30E-79  | 0.003 | 30 | 19.3 | Q2 |
| IPI00216694;l | PLS3     | 55.7 | <1.0E-304 | 0.003 | 30 | 17.8 | Q2 |
| IPI00005198;l | ILF2     | 37.2 | 1.56E-207 | 0.003 | 13 | 9.5  | Q2 |
| IPI00011454;l | GANAB    | 40.5 | <1.0E-304 | 0.004 | 19 | 11.0 | Q2 |
| IPI00477313;l | HNRNPC   | 45.8 | 8.19E-140 | 0.004 | 39 | 13.5 | Q2 |
| IPI00219774;l | PRKAR2A  | 21.5 | 1.64E-80  | 0.004 | 3  | 18.5 | Q2 |
| IPI00012512;l | RRAS2    | 35.7 | 3.74E-93  | 0.004 | 6  | 14.8 | Q2 |
| IPI00847168;l | RSU1     | 33.6 | 8.28E-59  | 0.004 | 10 | 16.4 | Q2 |
| IPI00018465;l | CCT7     | 51.9 | <1.0E-304 | 0.004 | 23 | 7.6  | Q2 |
| IPI00867509;l | CORO1C   | 31.3 | 1.03E-220 | 0.004 | 9  | 7.7  | Q2 |
| IPI00216308;l | VDAC1    | 71.7 | <1.0E-304 | 0.004 | 22 | 10.5 | Q2 |
| IPI00306195;l | AKT1S1   | 7.2  | 2.25E-05  | 0.004 | 2  | 5.3  | Q2 |
| IPI00170692;l | VAPA     | 42.6 | 5.85E-75  | 0.005 | 14 | 10.2 | Q2 |
| IPI00004860;l | RARS     | 47   | <1.0E-304 | 0.005 | 17 | 12.3 | Q2 |
| IPI00644712;l | XRCC6    | 48.3 | <1.0E-304 | 0.005 | 23 | 8.3  | Q2 |
| IPI00382843;l | PRNP     | 14.7 | 9.90E-40  | 0.005 | 6  | 7.8  | Q2 |
| IPI00024097;l | TES      | 30.4 | 1.27E-88  | 0.005 | 8  | 12.3 | Q2 |
| IPI00009922   | SLIRP    | 49.5 | 1.28E-27  | 0.005 | 9  | 14.9 | Q2 |
| IPI00789551;l | MATR3    | 28.3 | 6.40E-196 | 0.005 | 13 | 14.7 | Q2 |
| IPI00903105;l | CIAPIN1  | 22.1 | 1.15E-47  | 0.005 | 4  | 1.8  | Q2 |
| IPI00029012   | EIF3A    | 43   | 1.44E-244 | 0.005 | 11 | 19.8 | Q2 |
| IPI00027448   | ATP5L    | 55.3 | 2.05E-80  | 0.005 | 12 | 16.2 | Q2 |
| IPI00328753;l | KTN1     | 22.8 | 2.00E-182 | 0.006 | 3  | 5.6  | Q2 |
| IPI00016746;l | CBFB     | 23.6 | 1.04E-85  | 0.006 | 4  | 5.5  | Q2 |

|               |          |      |           |       |     |      |    |
|---------------|----------|------|-----------|-------|-----|------|----|
| IPI00002520;l | SHMT2    | 32.7 | 5.43E-200 | 0.006 | 11  | 14.6 | Q2 |
| IPI00021440;l | ACTG1    | 77.3 | <1.0E-304 | 0.006 | 255 | 13.0 | Q2 |
| IPI00550234;l | ARPC5    | 43.7 | 7.00E-36  | 0.006 | 6   | 5.8  | Q2 |
| IPI00024976   | TOMM22   | 66.2 | 1.27E-176 | 0.006 | 7   | 6.1  | Q2 |
| IPI00171903;l | HNRNPM   | 53.4 | <1.0E-304 | 0.006 | 24  | 11.7 | Q2 |
| IPI00073096;l | TRIM29   | 26.9 | 3.78E-62  | 0.006 | 9   | 6.8  | Q2 |
| IPI00291695;l | GPX8     | 24.4 | 2.80E-10  | 0.006 | 2   | 28.5 | Q2 |
| IPI00003438   | DNAJC8   | 20.2 | 1.60E-10  | 0.006 | 5   | 12.2 | Q2 |
| IPI00719752;l | EIF3B    | 37   | 2.35E-296 | 0.006 | 13  | 21.1 | Q2 |
| IPI00219155;l | RPL27    | 55.9 | 9.71E-40  | 0.006 | 19  | 23.1 | Q2 |
| IPI00013485;l | RPS2     | 50.2 | 3.85E-186 | 0.006 | 37  | 12.8 | Q2 |
| IPI00008380;l | PPP2CA   | 48.2 | 3.42E-231 | 0.007 | 12  | 7.4  | Q2 |
| IPI00744692;l | TALDO1   | 40.7 | 7.83E-105 | 0.007 | 19  | 8.3  | Q2 |
| IPI00013917;l | RPS12    | 71.2 | 5.87E-163 | 0.007 | 22  | 6.5  | Q2 |
| IPI00215914;l | ARF1     | 69.1 | 5.76E-180 | 0.007 | 35  | 16.9 | Q2 |
| IPI00017672;l | NP       | 76.8 | 4.16E-295 | 0.007 | 37  | 8.5  | Q2 |
| IPI00026663;l | ALDH1A3  | 50.8 | <1.0E-304 | 0.008 | 26  | 11.1 | Q2 |
| IPI00010414   | PDLIM1   | 82.4 | <1.0E-304 | 0.008 | 31  | 44.1 | Q2 |
| IPI00027230;l | HSP90B1  | 59.7 | <1.0E-304 | 0.008 | 61  | 13.1 | Q2 |
| IPI00220528   | SNRPF    | 55.8 | 1.78E-39  | 0.008 | 14  | 10.0 | Q2 |
| IPI00008527;l | RPLP1    | 51.8 | 1.33E-111 | 0.009 | 3   | 11.2 | Q2 |
| IPI00215919;l | ARF5     | 30   | 3.83E-127 | 0.009 | 6   | 5.4  | Q2 |
| IPI00218463;l | TIMM16   | 38.4 | 1.53E-87  | 0.009 | 4   | 6.0  | Q2 |
| IPI00016346;l | PROSC    | 32.7 | 1.31E-84  | 0.009 | 5   | 5.7  | Q2 |
| IPI00554737;l | PPP2R1A  | 47.9 | <1.0E-304 | 0.009 | 20  | 72.2 | Q2 |
| IPI00005038;l | HRSP12   | 15.3 | 7.58E-12  | 0.009 | 3   | 19.5 | Q2 |
| IPI00000861;l | LASP1    | 52.1 | 2.91E-72  | 0.009 | 32  | 47.7 | Q2 |
| IPI00015029;l | PTGES3   | 36.9 | 2.13E-94  | 0.009 | 12  | 7.2  | Q2 |
| IPI00026833   | ADSS     | 21.3 | 5.74E-86  | 0.009 | 2   | 6.8  | Q2 |
| IPI00414676;l | HSP90AB1 | 63.8 | <1.0E-304 | 0.009 | 66  | 10.5 | Q2 |
| IPI00658155;l | MRPS34   | 18.7 | 7.15E-26  | 0.010 | 3   | 2.5  | Q2 |
| IPI00012772;l | RPL8     | 28.4 | 3.51E-43  | 0.010 | 20  | 18.8 | Q2 |
| IPI00291510;l | IMPDH2   | 35.2 | 1.77E-257 | 0.010 | 16  | 13.3 | Q2 |
| IPI00232533;l | EIF1AX   | 45.8 | 3.42E-45  | 0.010 | 8   | 6.0  | Q2 |
| IPI00642211;l | RNPEP    | 17.9 | 2.90E-63  | 0.010 | 5   | 18.3 | Q2 |

|               |          |      |           |       |    |      |    |
|---------------|----------|------|-----------|-------|----|------|----|
| IPI00297477;l | SNRPA1   | 41.2 | 4.25E-127 | 0.010 | 9  | 9.9  | Q2 |
| IPI00219910;l | BLVRB    | 38.2 | 1.87E-75  | 0.010 | 7  | 8.2  | Q2 |
| IPI00004902;l | ETFB     | 60   | 2.23E-116 | 0.010 | 20 | 11.5 | Q2 |
| IPI00221091;l | RPS15A   | 35.4 | 1.03E-11  | 0.010 | 35 | 9.8  | Q2 |
| IPI00010863   | ATOX1    | 50   | 3.53E-09  | 0.011 | 6  | 6.2  | Q2 |
| IPI00024821;l | PSMD14   | 43.5 | 2.29E-56  | 0.011 | 6  | 5.5  | Q2 |
| IPI00375677;l | MRPL21   | 19.6 | 3.28E-11  | 0.011 | 2  | 11.8 | Q2 |
| IPI00419194;l | IAH1     | 18.1 | 1.18E-07  | 0.011 | 3  | 4.3  | Q2 |
| IPI00012079;l | EIF4B    | 24.4 | 5.08E-50  | 0.011 | 4  | 7.3  | Q2 |
| IPI00902584;l | VASP     | 30.1 | 1.39E-67  | 0.011 | 6  | 16.5 | Q2 |
| IPI00007001;l | MRPL11   | 46.9 | 2.06E-43  | 0.011 | 7  | 7.7  | Q2 |
| IPI00293434;l | SRP14    | 40.4 | 1.61E-67  | 0.011 | 9  | 19.2 | Q2 |
| IPI00640817;l | AK1      | 37.6 | 1.62E-70  | 0.011 | 5  | 8.4  | Q2 |
| IPI00003768;l | PES1     | 10.4 | 3.54E-24  | 0.011 | 4  | 25.9 | Q2 |
| IPI00103994;l | LARS     | 42   | <1.0E-304 | 0.011 | 11 | 15.8 | Q2 |
| IPI00872940;l | RPL30    | 77.4 | 3.15E-150 | 0.011 | 32 | 8.9  | Q2 |
| IPI00382470;l | HSP90AA1 | 32.8 | <1.0E-304 | 0.012 | 33 | 24.9 | Q2 |
| IPI00007755;l | RAB21    | 39.1 | 7.23E-115 | 0.012 | 8  | 11.2 | Q2 |
| IPI00218993;l | HSPH1    | 48.3 | <1.0E-304 | 0.012 | 11 | 8.1  | Q2 |
| IPI00299155;l | PSMA4    | 55.6 | 1.13E-195 | 0.012 | 12 | 7.1  | Q2 |
| IPI00000105;l | MVP      | 47.7 | <1.0E-304 | 0.012 | 34 | 13.6 | Q2 |
| IPI00220739;l | PGRMC1   | 34.9 | 9.94E-107 | 0.012 | 11 | 9.0  | Q2 |
| IPI00873110;l | LYRM7    | 31.7 | 1.12E-10  | 0.012 | 4  | 13.6 | Q2 |
| IPI00001543   | TIMM10   | 16.7 | 7.87E-03  | 0.012 | 2  | 6.0  | Q2 |
| IPI00001146   | LSM6     | 43.8 | 3.74E-13  | 0.012 | 6  | 7.6  | Q2 |
| IPI00029631   | ERH      | 34.6 | 1.30E-23  | 0.012 | 10 | 10.1 | Q2 |
| IPI00028160;l | HMBS     | 13   | 3.05E-150 | 0.013 | 3  | 17.3 | Q2 |
| IPI00028481;l | RAB8A    | 33.8 | 1.14E-97  | 0.013 | 13 | 25.2 | Q2 |
| IPI00013068;l | EIF3E    | 47.9 | 1.22E-199 | 0.013 | 11 | 7.8  | Q2 |
| IPI00219604;l | MAP2K1   | 23.7 | 9.60E-15  | 0.014 | 5  | 12.1 | Q2 |
| IPI00024175;l | PSMA7    | 44.8 | 1.40E-174 | 0.014 | 12 | 5.2  | Q2 |
| IPI00023647;l | UBA6     | 29.4 | 4.55E-278 | 0.014 | 13 | 14.1 | Q2 |
| IPI00156689;l | VAT1     | 26.2 | 3.04E-169 | 0.014 | 10 | 10.5 | Q2 |
| IPI00747533;l | PGD      | 40.7 | <1.0E-304 | 0.014 | 20 | 9.9  | Q2 |
| IPI00031616;l | C17orf37 | 13.6 | 8.77E-07  | 0.014 | 5  | 14.0 | Q2 |

|               |           |      |           |       |     |      |    |
|---------------|-----------|------|-----------|-------|-----|------|----|
| IPI00554711;l | JUP       | 29   | 1.17E-256 | 0.014 | 12  | 5.9  | Q2 |
| IPI00010896;l | CLIC1     | 79.3 | <1.0E-304 | 0.014 | 29  | 10.8 | Q2 |
| IPI00029444;l | C12orf10  | 11.7 | 3.17E-43  | 0.014 | 4   | 21.1 | Q2 |
| IPI00011603;l | PSMD3     | 32.8 | 3.16E-219 | 0.014 | 14  | 23.8 | Q2 |
| IPI00011302   | CD59      | 25   | 3.46E-27  | 0.014 | 11  | 11.7 | Q2 |
| IPI00175096;l | TTC9C     | 21.6 | 2.09E-13  | 0.015 | 6   | 27.5 | Q2 |
| IPI00328748;l | ARMET     | 32.1 | 8.45E-94  | 0.015 | 13  | 8.2  | Q2 |
| IPI00384444;l | KRT14     | 81.6 | <1.0E-304 | 0.015 | 434 | 37.6 | Q2 |
| IPI00828150;l | SUGT1     | 29.3 | 1.67E-99  | 0.015 | 6   | 14.5 | Q2 |
| IPI00032206;l | PDLIM4    | 30.6 | 2.51E-27  | 0.015 | 7   | 24.8 | Q2 |
| IPI00293655   | DDX1      | 28.1 | 3.67E-150 | 0.015 | 9   | 13.9 | Q2 |
| IPI00796864;l | DPM1      | 32.5 | 1.57E-59  | 0.015 | 8   | 9.2  | Q2 |
| IPI00889541;l | DDX17     | 21.1 | 2.68E-163 | 0.015 | 5   | 10.3 | Q2 |
| IPI00014151;l | PSMD6     | 42.4 | 1.08E-128 | 0.015 | 9   | 7.4  | Q2 |
| IPI00007188   | SLC25A5   | 50.7 | 1.07E-172 | 0.015 | 45  | 13.9 | Q2 |
| IPI00003923;l | UMPS      | 26.7 | 5.77E-112 | 0.016 | 6   | 21.8 | Q2 |
| IPI00151462;l | MAP1LC3B2 | 5.6  | 4.87E-02  | 0.016 | 2   | 10.6 | Q2 |
| IPI00874235;l | ERGIC1    | 14.8 | 4.70E-14  | 0.016 | 3   | 2.5  | Q2 |
| IPI00012074;l | HNRNPR    | 24.8 | 4.14E-199 | 0.016 | 4   | 8.5  | Q2 |
| IPI00008569;l | YKT6      | 53.5 | 1.05E-111 | 0.016 | 11  | 6.4  | Q2 |
| IPI00604620;l | NCL       | 37.2 | <1.0E-304 | 0.016 | 23  | 16.8 | Q2 |
| IPI00013122   | CDC37     | 33.9 | 3.37E-158 | 0.016 | 8   | 12.7 | Q2 |
| IPI00014377   | RAB32     | 30.2 | 1.87E-34  | 0.016 | 9   | 15.1 | Q2 |
| IPI00014624   | AP3S1     | 18.1 | 1.22E-69  | 0.016 | 10  | 9.8  | Q2 |
| IPI00024993   | ECHS1     | 43.4 | 1.59E-266 | 0.016 | 10  | 15.1 | Q2 |
| IPI00032830;l | REXO2     | 27.8 | 4.80E-25  | 0.016 | 8   | 24.8 | Q2 |
| IPI00012011;l | CFL1      | 89.2 | <1.0E-304 | 0.016 | 59  | 13.7 | Q2 |
| IPI00555956   | PSMB4     | 31.8 | 3.15E-191 | 0.016 | 7   | 5.6  | Q2 |
| IPI00107104;l | CXorf26   | 41.2 | 3.27E-119 | 0.016 | 6   | 7.8  | Q2 |
| IPI00021700   | PCNA      | 64.4 | 6.15E-261 | 0.017 | 18  | 6.3  | Q2 |
| IPI00220014;l | IDI1      | 25.4 | 4.31E-75  | 0.017 | 9   | 13.5 | Q2 |
| IPI00910781;l | GPI       | 37.3 | 6.55E-265 | 0.017 | 21  | 38.9 | Q2 |
| IPI00007402   | IPO7      | 24.2 | <1.0E-304 | 0.017 | 10  | 4.9  | Q2 |
| IPI00646689;l | TXNDC17   | 44.7 | 3.00E-44  | 0.017 | 15  | 6.8  | Q2 |
| IPI00015148;l | RAP1B     | 41.8 | 1.19E-102 | 0.017 | 10  | 8.8  | Q2 |

|               |          |      |           |       |     |      |    |
|---------------|----------|------|-----------|-------|-----|------|----|
| IPI00217563;l | ITGB1    | 26.8 | 9.83E-119 | 0.018 | 10  | 5.8  | Q2 |
| IPI00009901   | NUTF2    | 22.8 | 7.71E-04  | 0.018 | 3   | 10.3 | Q2 |
| IPI00003588;l | EEF1E1   | 44.3 | 1.05E-36  | 0.018 | 10  | 13.3 | Q2 |
| IPI00418471;l | VIM      | 76.4 | <1.0E-304 | 0.018 | 116 | 16.4 | Q2 |
| IPI00168262;l | GLT25D1  | 8.4  | 9.21E-09  | 0.019 | 2   | 3.1  | Q2 |
| IPI00017469;l | SPR      | 33.7 | 4.26E-152 | 0.019 | 4   | 8.2  | Q2 |
| IPI00328170;l | MOGS     | 17.4 | 1.36E-81  | 0.019 | 4   | 29.6 | Q2 |
| IPI00029731;l | RPL35A   | 45.5 | 6.84E-10  | 0.019 | 29  | 12.8 | Q2 |
| IPI00011250;l | UCHL3    | 46.1 | 1.69E-113 | 0.019 | 9   | 6.6  | Q2 |
| IPI00215878;l | ATP5E    | 45.1 | 1.87E-02  | 0.019 | 3   | 6.1  | Q2 |
| IPI00024664;l | USP5     | 20.2 | 2.43E-105 | 0.020 | 6   | 8.1  | Q2 |
| IPI00555902;l | OCIAD2   | 63   | 2.06E-53  | 0.020 | 16  | 9.2  | Q2 |
| IPI00796379;l | beta 2   | 21.3 | 3.37E-11  | 0.020 | 8   | 10.6 | Q2 |
| IPI00515106;l | GUK1     | 19.1 | 6.10E-19  | 0.020 | 3   | 4.1  | Q2 |
| IPI00219675;l | RAC1     | 48.3 | 1.04E-154 | 0.020 | 22  | 16.7 | Q2 |
| IPI00303476;l | ATP5B    | 61.1 | <1.0E-304 | 0.020 | 44  | 11.0 | Q2 |
| IPI00303568;l | PTGES2   | 21   | 1.11E-87  | 0.020 | 3   | 7.6  | Q2 |
| IPI00002214;l | KPNA2    | 28.2 | 3.23E-195 | 0.020 | 4   | 15.7 | Q2 |
| IPI00375531;l | NME1     | 7.9  | 7.99E-125 | 0.020 | 4   | 2.9  | Q2 |
| IPI00032561;l | CAB39    | 41.6 | 7.89E-78  | 0.020 | 14  | 6.9  | Q2 |
| IPI00031420   | UGDH     | 21.7 | 4.05E-81  | 0.020 | 5   | 10.0 | Q2 |
| IPI00473014;l | DSTN     | 50.3 | 1.24E-90  | 0.021 | 24  | 10.2 | Q2 |
| IPI00100980;l | EHD2     | 15.1 | 4.14E-56  | 0.021 | 3   | 23.1 | Q2 |
| IPI00790342;l | RPL6     | 49.1 | 3.09E-120 | 0.021 | 41  | 15.4 | Q2 |
| IPI00015952;l | EIF4G2   | 23.7 | 2.31E-141 | 0.021 | 9   | 14.8 | Q2 |
| IPI00007102;l | C17orf25 | 26.8 | 4.83E-151 | 0.021 | 11  | 8.9  | Q2 |
| IPI00412811   | COMMD10  | 20.3 | 6.56E-17  | 0.021 | 2   | 4.8  | Q2 |
| IPI00304577;l | AP2A1    | 23.1 | 4.48E-218 | 0.021 | 5   | 16.0 | Q2 |
| IPI00009943;l | TPT1     | 52.7 | 9.23E-125 | 0.021 | 15  | 4.8  | Q2 |
| IPI00217943;l | RAB6A    | 62.5 | 5.09E-93  | 0.021 | 20  | 8.4  | Q2 |
| IPI00177008   | PGP      | 27.1 | 6.30E-42  | 0.021 | 2   | 23.6 | Q2 |
| IPI00026202;l | RPL18A   | 51.1 | 2.58E-96  | 0.021 | 12  | 4.6  | Q2 |
| IPI00219153;l | RPL22    | 32   | 2.80E-57  | 0.021 | 16  | 9.3  | Q2 |
| IPI00296053;l | FH       | 28.2 | 4.88E-191 | 0.022 | 6   | 8.0  | Q2 |
| IPI00056334;l | PRKCDBP  | 44.1 | 5.99E-111 | 0.022 | 14  | 11.7 | Q2 |

|               |          |      |           |       |     |      |    |
|---------------|----------|------|-----------|-------|-----|------|----|
| IPI00011654;I | TUBB     | 73.4 | <1.0E-304 | 0.022 | 141 | 16.3 | Q2 |
| IPI00020472;I | TMEM111  | 18.4 | 9.71E-72  | 0.022 | 2   | 2.6  | Q2 |
| IPI00020599;I | CALR     | 52.5 | 3.01E-268 | 0.022 | 24  | 11.5 | Q2 |
| IPI00025491;I | EIF4A1   | 60.6 | <1.0E-304 | 0.022 | 51  | 19.3 | Q2 |
| IPI00479145;I | KRT19    | 29.5 | <1.0E-304 | 0.022 | 31  | 16.0 | Q2 |
| IPI00871693;I | VAMP3    | 52   | 2.46E-139 | 0.022 | 8   | 7.1  | Q2 |
| IPI00220493;I | LSM5     | 20.9 | 3.87E-48  | 0.023 | 2   | 3.0  | Q2 |
| IPI00107555;I | PFN2     | 30.9 | 4.01E-77  | 0.023 | 10  | 11.4 | Q2 |
| IPI00908697;I | CCDC115  | 8.8  | 7.10E-08  | 0.023 | 3   | 16.6 | Q2 |
| IPI00852741;I | SEC31A   | 20.4 | 3.56E-77  | 0.023 | 13  | 21.9 | Q2 |
| IPI00026302;I | RPL31    | 48   | 3.90E-42  | 0.023 | 22  | 25.6 | Q2 |
| IPI00215719;I | RPL18    | 45.7 | 2.43E-86  | 0.023 | 26  | 10.0 | Q2 |
| IPI00003004;I | SLC25A22 | 11.5 | 9.56E-13  | 0.023 | 3   | 4.0  | Q2 |
| IPI00026154;I | PRKCSH   | 33.3 | 8.63E-215 | 0.023 | 6   | 6.5  | Q2 |
| IPI00291643   | SPRYD4   | 20.8 | 1.85E-09  | 0.024 | 2   | 11.6 | Q2 |
| IPI00418313;I | ILF3     | 33.1 | 1.37E-298 | 0.024 | 12  | 10.6 | Q2 |
| IPI00410693;I | SERBP1   | 43.4 | 6.43E-156 | 0.024 | 20  | 13.4 | Q2 |
| IPI00016339;I | RAB5C    | 54.2 | 2.22E-175 | 0.024 | 19  | 11.8 | Q2 |
| IPI00306280;I | DENR     | 32.2 | 1.89E-135 | 0.024 | 3   | 4.8  | Q2 |
| IPI00872862;I | C1orf151 | 9    | 3.51E-03  | 0.025 | 2   | 4.8  | Q2 |
| IPI00100673;I | VPS24    | 14.9 | 1.99E-04  | 0.025 | 4   | 12.6 | Q2 |
| IPI00294779;I | VDAC3    | 39.8 | 5.40E-96  | 0.025 | 15  | 16.3 | Q2 |
| IPI00924787;I | MYD88    | 7.9  | 1.31E-05  | 0.025 | 3   | 4.2  | Q2 |
| IPI00007058;I | CORO1B   | 16.4 | 8.93E-42  | 0.025 | 4   | 4.3  | Q2 |
| IPI00410091   | C11orf73 | 8.1  | 4.42E-04  | 0.026 | 2   | 16.7 | Q2 |
| IPI00063903   | USMG5    | 43.1 | 1.79E-49  | 0.026 | 4   | 5.3  | Q2 |
| IPI00878611;I | RANBP1   | 25.4 | 6.33E-51  | 0.026 | 7   | 9.2  | Q2 |
| IPI00015361;I | PFDN5    | 59.1 | 1.44E-144 | 0.026 | 10  | 9.7  | Q2 |
| IPI00553185;I | CCT3     | 57.6 | <1.0E-304 | 0.026 | 21  | 7.5  | Q2 |
| IPI00006865   | SEC22B   | 45.1 | 7.00E-169 | 0.026 | 13  | 18.0 | Q2 |
| IPI00216298;I | TXN      | 48.6 | 8.53E-43  | 0.026 | 15  | 9.7  | Q2 |
| IPI00024067;I | CLTC     | 50.3 | <1.0E-304 | 0.026 | 36  | 12.7 | Q2 |
| IPI00872295;I | ANXA8    | 48.9 | <1.0E-304 | 0.027 | 22  | 8.4  | Q2 |
| IPI00021347;I | UBE2L3   | 47.4 | 1.23E-173 | 0.027 | 7   | 25.3 | Q2 |
| IPI00647217;F | SKIV2L2  | 22.1 | 4.53E-172 | 0.027 | 2   | 3.0  | Q2 |

|               |          |      |           |       |    |      |    |
|---------------|----------|------|-----------|-------|----|------|----|
| IPI00007423;l | ANP32B   | 34.7 | 1.35E-147 | 0.027 | 20 | 9.5  | Q2 |
| IPI00027107   | TUFM     | 59.8 | 8.92E-287 | 0.027 | 14 | 14.7 | Q2 |
| IPI00015117;l | LAMC2    | 47   | <1.0E-304 | 0.027 | 9  | 16.7 | Q2 |
| IPI00060031   | ARL8A    | 16.7 | 2.12E-62  | 0.028 | 4  | 16.6 | Q2 |
| IPI00297579;l | CBX3     | 39.3 | 1.33E-156 | 0.028 | 9  | 6.0  | Q2 |
| IPI00746777;l | ADH5     | 35.6 | 4.96E-212 | 0.028 | 16 | 8.6  | Q2 |
| IPI00029133;l | ATP5F1   | 44.1 | 1.50E-72  | 0.028 | 11 | 7.5  | Q2 |
| IPI00028635;l | RPN2     | 20.2 | 2.37E-198 | 0.028 | 13 | 9.5  | Q2 |
| IPI00100748;l | HSPBP1   | 17.8 | 2.45E-48  | 0.028 | 4  | 4.7  | Q2 |
| IPI00005613;l | U2AF1    | 35   | 5.43E-93  | 0.028 | 7  | 10.6 | Q2 |
| IPI00221088;l | RPS9     | 59.8 | 1.01E-82  | 0.028 | 25 | 17.1 | Q2 |
| IPI00026111;l | TMCO1    | 24.5 | 3.47E-51  | 0.028 | 4  | 28.5 | Q2 |
| IPI00013877;l | HNRNPH3  | 30.9 | 1.80E-120 | 0.028 | 20 | 22.4 | Q2 |
| IPI00018873;l | NAMPT    | 32   | 8.01E-206 | 0.028 | 6  | 12.1 | Q2 |
| IPI00000051   | PFDN1    | 37.7 | 4.06E-19  | 0.028 | 9  | 7.4  | Q2 |
| IPI00216319;l | YWHAH    | 44.3 | 5.49E-216 | 0.028 | 17 | 10.7 | Q2 |
| IPI00299193   | SYNJ2BP  | 37.2 | 1.41E-12  | 0.029 | 4  | 12.8 | Q2 |
| IPI00219953;l | CMPK1    | 40.8 | 5.91E-97  | 0.029 | 6  | 18.6 | Q2 |
| IPI00418497;l | TIMM50   | 15.4 | 3.21E-83  | 0.029 | 6  | 8.4  | Q2 |
| IPI00219685;l | NDUFA13  | 15.9 | 3.18E-09  | 0.029 | 8  | 19.2 | Q2 |
| IPI00004988   | MANBAL   | 14.1 | 2.23E-02  | 0.029 | 2  | 8.7  | Q2 |
| IPI00179589;l | MTPN     | 33.8 | 5.52E-71  | 0.029 | 7  | 7.6  | Q2 |
| IPI00030911;l | VAMP8    | 53   | 9.88E-76  | 0.029 | 10 | 28.2 | Q2 |
| IPI00008530;l | RPLP0    | 50.2 | 9.13E-247 | 0.029 | 32 | 14.3 | Q2 |
| IPI00061108;l | MRRF     | 21.4 | 8.64E-41  | 0.029 | 3  | 3.2  | Q2 |
| IPI00012345;l | SFRS6    | 11   | 2.14E-08  | 0.029 | 7  | 3.5  | Q2 |
| IPI00002824;l | CSRP2    | 36.8 | 7.05E-44  | 0.029 | 4  | 7.2  | Q2 |
| IPI00514619;l | C2orf4   | 35.7 | 1.25E-104 | 0.029 | 5  | 10.6 | Q2 |
| IPI00217277;l | SLC25A10 | 18.2 | 1.69E-55  | 0.029 | 4  | 17.3 | Q2 |
| IPI00016608;l | TMED2    | 23.9 | 1.80E-20  | 0.030 | 11 | 7.8  | Q2 |
| IPI00021267;l | EPHA2    | 12.9 | 5.18E-138 | 0.030 | 5  | 14.5 | Q2 |
| IPI00006907;l | TIGAR    | 37.4 | 6.68E-123 | 0.030 | 8  | 19.3 | Q2 |
| IPI00215918;l | ARF4     | 38.9 | 5.60E-152 | 0.030 | 19 | 18.0 | Q2 |
| IPI00419249;l | PSMA3    | 41.6 | 7.05E-90  | 0.030 | 14 | 15.7 | Q2 |
| IPI00017704   | COTL1    | 40.8 | 9.69E-15  | 0.030 | 35 | 9.4  | Q2 |

|               |          |      |           |       |     |      |    |
|---------------|----------|------|-----------|-------|-----|------|----|
| IPI00307547   | C9orf46  | 27.2 | 3.10E-15  | 0.030 | 9   | 17.9 | Q2 |
| IPI00026627   | RP2      | 5.1  | 9.86E-04  | 0.030 | 2   | 11.0 | Q2 |
| IPI00291669   | UBLCP1   | 12.6 | 1.11E-16  | 0.030 | 4   | 6.2  | Q2 |
| IPI00604590;l | NME1     | 71.9 | 3.14E-195 | 0.030 | 36  | 7.3  | Q2 |
| IPI00032140;l | SERPINH1 | 55.5 | <1.0E-304 | 0.030 | 25  | 13.4 | Q2 |
| IPI00396967;l | FHL2     | 33.7 | 9.64E-121 | 0.031 | 8   | 14.3 | Q2 |
| IPI00216951;l | DARS     | 55.9 | 1.63E-175 | 0.031 | 14  | 11.1 | Q2 |
| IPI00294619;l | TFG      | 17   | 1.02E-31  | 0.031 | 8   | 16.2 | Q2 |
| IPI00329801;l | ANXA5    | 81.9 | <1.0E-304 | 0.031 | 43  | 9.3  | Q2 |
| IPI00021570;l | EDF1     | 35.1 | 1.81E-35  | 0.031 | 4   | 1.7  | Q2 |
| IPI00007118;l | SERPINE1 | 14.7 | 1.61E-27  | 0.031 | 6   | 16.1 | Q2 |
| IPI00220362;l | HSPE1    | 70.6 | 1.57E-71  | 0.031 | 21  | 10.7 | Q2 |
| IPI00020530   | ACOT13   | 15.7 | 2.43E-26  | 0.031 | 4   | 8.4  | Q2 |
| IPI00009032;l | SSB      | 40.9 | 1.25E-110 | 0.031 | 10  | 4.3  | Q2 |
| IPI00294159;l | SLC25A1  | 28.9 | 1.23E-48  | 0.031 | 12  | 7.6  | Q2 |
| IPI00019502;l | MYH9     | 65.7 | <1.0E-304 | 0.031 | 22  | 13.9 | Q2 |
| IPI00030820;l | MRPL47   | 21.6 | 1.15E-24  | 0.031 | 4   | 3.4  | Q2 |
| IPI00005578   | EHD4     | 29.4 | 9.82E-159 | 0.032 | 5   | 4.5  | Q2 |
| IPI00031522;l | HADHA    | 32   | <1.0E-304 | 0.032 | 14  | 15.4 | Q2 |
| IPI00514587;l | SARS     | 29.7 | 3.99E-83  | 0.032 | 5   | 5.5  | Q2 |
| IPI00014898;l | PLEC1    | 68.9 | <1.0E-304 | 0.032 | 29  | 11.8 | Q2 |
| IPI00180675;l | TUBA1A   | 66.1 | <1.0E-304 | 0.032 | 114 | 13.2 | Q2 |
| IPI00007676;l | HSD17B12 | 41   | 1.72E-109 | 0.033 | 13  | 8.6  | Q2 |
| IPI00783271;l | LRPPRC   | 48.1 | <1.0E-304 | 0.033 | 25  | 10.5 | Q2 |
| IPI00910701;l | AARS     | 38.7 | <1.0E-304 | 0.033 | 10  | 10.2 | Q2 |
| IPI00007163   | LSM7     | 15.5 | 1.20E-02  | 0.033 | 2   | 5.9  | Q2 |
| IPI00856098;l | RRBP1    | 38.1 | <1.0E-304 | 0.033 | 4   | 37.9 | Q2 |
| IPI00020602   | CSNK2A2  | 18.6 | 3.94E-54  | 0.033 | 3   | 11.8 | Q2 |
| IPI00021370;l | UBE2K    | 50.5 | 6.38E-91  | 0.033 | 10  | 12.9 | Q2 |
| IPI00009253;l | NAPA     | 43.1 | 8.73E-137 | 0.034 | 6   | 6.8  | Q2 |
| IPI00001699;l | PYCARD   | 54.4 | 4.45E-108 | 0.034 | 11  | 9.0  | Q2 |
| IPI00061525;l | GNPNAT1  | 45.7 | 1.98E-166 | 0.034 | 2   | 5.0  | Q2 |
| IPI00020436;l | RAB11B   | 60.6 | 4.17E-166 | 0.034 | 20  | 7.5  | Q2 |
| IPI00789324;l | JUP      | 66.8 | <1.0E-304 | 0.034 | 83  | 13.4 | Q2 |
| IPI00641788;l | SNRPC    | 11.7 | 1.51E-33  | 0.034 | 2   | 10.5 | Q2 |



|               |         |      |           |       |    |      |    |
|---------------|---------|------|-----------|-------|----|------|----|
| IPI00026824   | HMOX2   | 35.9 | 7.09E-83  | 0.034 | 11 | 9.1  | Q2 |
| IPI00418290   | MRPL14  | 29.7 | 9.62E-24  | 0.035 | 5  | 4.6  | Q2 |
| IPI00032851;l | COPZ1   | 30.5 | 2.76E-119 | 0.035 | 6  | 5.1  | Q2 |
| IPI00296191;l | ATP6V1H | 10.8 | 2.07E-67  | 0.035 | 2  | 4.6  | Q2 |
| IPI00008552   | GLRX3   | 42.4 | 7.26E-117 | 0.035 | 11 | 7.4  | Q2 |
| IPI00009958;l | COPS5   | 33.2 | 2.97E-43  | 0.035 | 6  | 5.7  | Q2 |
| IPI00646917;l | NUDT21  | 34.4 | 6.91E-156 | 0.035 | 12 | 10.5 | Q2 |
| IPI00216026;l | VDAC2   | 52.4 | 2.32E-215 | 0.035 | 22 | 9.7  | Q2 |
| IPI00030320   | DDX6    | 24.4 | 8.39E-89  | 0.035 | 5  | 16.8 | Q2 |
| IPI00017160;l | VTA1    | 25.7 | 2.01E-14  | 0.035 | 6  | 10.1 | Q2 |
| IPI00219077;l | LTA4H   | 44.7 | <1.0E-304 | 0.035 | 13 | 8.4  | Q2 |
| IPI00783982;l | COPG    | 37.8 | <1.0E-304 | 0.035 | 18 | 11.0 | Q2 |
| IPI00010136;l | CTBP2   | 7.9  | 4.32E-30  | 0.036 | 3  | 6.2  | Q2 |
| IPI00479743;l | POTEE   | 2.4  | 4.67E-246 | 0.036 | 3  | 6.3  | Q2 |
| IPI00550451;l | PPP1CA  | 49.1 | 2.37E-290 | 0.036 | 15 | 14.0 | Q2 |
| IPI00006482;l | ATP1A1  | 34.3 | <1.0E-304 | 0.036 | 10 | 20.5 | Q2 |
| IPI00894409;l | CPNE1   | 12   | 1.15E-06  | 0.036 | 4  | 21.7 | Q2 |
| IPI00026952   | PKP3    | 42.9 | <1.0E-304 | 0.036 | 10 | 8.9  | Q2 |
| IPI00294158;l | BLVRA   | 40.5 | 2.17E-80  | 0.036 | 11 | 12.8 | Q2 |
| IPI00028004;l | PSMB3   | 49.8 | 2.25E-210 | 0.038 | 5  | 11.9 | Q2 |
| IPI00002460;l | ANXA7   | 21.3 | 2.33E-81  | 0.038 | 8  | 13.0 | Q2 |
| IPI00015018;l | PPA1    | 80.6 | <1.0E-304 | 0.038 | 24 | 12.2 | Q2 |
| IPI00168388;l | SRP68   | 17.9 | 1.26E-63  | 0.038 | 5  | 10.9 | Q2 |
| IPI00297779;l | CCT2    | 67.5 | <1.0E-304 | 0.038 | 19 | 9.7  | Q2 |
| IPI00456664;l | NIT1    | 26.4 | 1.44E-43  | 0.038 | 6  | 15.0 | Q2 |
| IPI00060715;l | KCTD12  | 31.1 | 3.17E-84  | 0.038 | 11 | 85.1 | Q2 |
| IPI00299554   | KIF14   | 1.1  | 9.92E-08  | 0.039 | 2  | 5.4  | Q2 |
| IPI00009634;l | SQRDL   | 48.9 | 4.28E-179 | 0.039 | 17 | 6.7  | Q2 |
| IPI00873410;l | CNN3    | 28.5 | 6.81E-84  | 0.039 | 8  | 8.8  | Q2 |
| IPI00220642;l | YWHAG   | 51   | 9.32E-174 | 0.039 | 19 | 16.3 | Q2 |
| IPI00009904;l | PDIA4   | 47.6 | <1.0E-304 | 0.039 | 21 | 17.0 | Q2 |
| IPI00550746;l | NUDC    | 47.4 | 3.79E-127 | 0.039 | 9  | 5.4  | Q2 |
| IPI00219097   | HMGB2   | 12.4 | 1.38E-30  | 0.040 | 3  | 8.3  | Q2 |
| IPI00291467;l | SLC25A6 | 20.5 | 1.26E-128 | 0.040 | 14 | 10.5 | Q2 |
| IPI00871988;l | SFXN3   | 41.3 | 1.29E-182 | 0.040 | 5  | 8.0  | Q2 |

|               |          |      |           |       |    |      |    |
|---------------|----------|------|-----------|-------|----|------|----|
| IPI00419237;l | LAP3     | 41   | 1.77E-179 | 0.040 | 8  | 10.5 | Q2 |
| IPI00001734;l | PSAT1    | 27.5 | 1.05E-46  | 0.040 | 9  | 9.6  | Q2 |
| IPI00549725;l | PGAM1    | 67.7 | 1.77E-284 | 0.041 | 30 | 20.2 | Q2 |
| IPI00219622;l | PSMA2    | 54.3 | 7.85E-228 | 0.041 | 10 | 17.8 | Q2 |
| IPI00376005;l | EIF5A    | 60.9 | 4.05E-198 | 0.041 | 31 | 7.8  | Q2 |
| IPI00022597   | UBE2M    | 42.1 | 6.87E-79  | 0.041 | 8  | 5.0  | Q2 |
| IPI00303722;l | FAM136A  | 23.2 | 3.46E-09  | 0.041 | 4  | 4.8  | Q2 |
| IPI00027434;l | RHOC     | 23.3 | 5.12E-220 | 0.041 | 3  | 8.9  | Q2 |
| IPI00017367;l | RDX      | 22   | 1.91E-162 | 0.041 | 5  | 8.8  | Q2 |
| IPI00470674;l | CYB5R1   | 42   | 2.35E-96  | 0.041 | 11 | 10.5 | Q2 |
| IPI00008524;l | PABPC1   | 37.3 | <1.0E-304 | 0.041 | 23 | 12.9 | Q2 |
| IPI00759776;l | ACTN1    | 51.1 | <1.0E-304 | 0.041 | 54 | 8.5  | Q2 |
| IPI00027350;l | PRDX2    | 35.4 | 1.39E-144 | 0.041 | 11 | 7.7  | Q2 |
| IPI00419258;l | HMGB1    | 51.2 | 1.80E-168 | 0.041 | 14 | 9.4  | Q2 |
| IPI00002966;l | HSPA4    | 55.8 | <1.0E-304 | 0.041 | 22 | 11.2 | Q2 |
| IPI00002149;l | SAR1B    | 23.2 | 5.38E-38  | 0.042 | 3  | 8.3  | Q2 |
| IPI00329373   | QIL1     | 10.2 | 2.14E-01  | 0.042 | 4  | 13.8 | Q2 |
| IPI00218782;l | CAPZB    | 46.3 | 6.55E-208 | 0.042 | 29 | 9.2  | Q2 |
| IPI00908469   | TUBB6    | 33   | <1.0E-304 | 0.042 | 10 | 3.2  | Q2 |
| IPI00384051;l | PSME2    | 54.2 | 5.24E-104 | 0.042 | 13 | 97.6 | Q2 |
| IPI00639812;l | MGST3    | 16.9 | 1.34E-65  | 0.043 | 3  | 17.1 | Q2 |
| IPI00023001;l | FAM162A  | 24.7 | 4.95E-69  | 0.043 | 4  | 16.7 | Q2 |
| IPI00017510   | MT       | 35.2 | 1.19E-101 | 0.043 | 8  | 10.9 | Q2 |
| IPI00019329   | DYNLL1   | 57.3 | 3.47E-72  | 0.043 | 9  | 12.3 | Q2 |
| IPI00643591;l | AP1G1    | 16.6 | 2.08E-70  | 0.043 | 6  | 31.5 | Q2 |
| IPI00218733;l | SOD1     | 59.1 | 9.66E-100 | 0.043 | 9  | 16.3 | Q2 |
| IPI00018768;l | TSN      | 29.8 | 3.72E-76  | 0.043 | 4  | 9.3  | Q2 |
| IPI00029764;l | SF3A3    | 17.6 | 5.12E-31  | 0.043 | 3  | 10.0 | Q2 |
| IPI00796333;l | ALDOA    | 66.5 | <1.0E-304 | 0.043 | 51 | 18.7 | Q2 |
| IPI00790739;l | ACO2     | 35   | 3.42E-250 | 0.043 | 11 | 12.5 | Q2 |
| IPI00000581;l | OTUB1    | 47.4 | 1.17E-194 | 0.043 | 15 | 7.3  | Q2 |
| IPI00816419   | C1orf151 | 48.7 | 7.16E-07  | 0.043 | 3  | 5.0  | Q2 |
| IPI00887678;l | PPIA     | 52.9 | <1.0E-304 | 0.043 | 68 | 14.3 | Q2 |
| IPI00183500;l | NCBP2    | 16.7 | 1.26E-05  | 0.044 | 3  | 16.7 | Q2 |
| IPI00221222;l | SUB1     | 42.5 | 3.56E-37  | 0.044 | 21 | 10.0 | Q2 |

|               |          |      |           |       |    |      |    |
|---------------|----------|------|-----------|-------|----|------|----|
| IPI00399053;l | C3orf60  | 27.2 | 5.85E-09  | 0.044 | 4  | 1.3  | Q2 |
| IPI00220031;l | PXN      | 15   | 9.87E-108 | 0.044 | 9  | 13.0 | Q2 |
| IPI00916111;l | MDH1     | 44.9 | 3.22E-234 | 0.044 | 17 | 8.5  | Q2 |
| IPI00029558;l | NDUFC2   | 12.6 | 2.47E-02  | 0.044 | 2  | 1.5  | Q2 |
| IPI00008234;l | CYB5R2   | 23.9 | 4.03E-09  | 0.045 | 4  | 11.7 | Q2 |
| IPI00006052   | PFDN2    | 41.6 | 2.37E-69  | 0.045 | 12 | 5.1  | Q2 |
| IPI00872762;l | SUCLG1   | 22   | 5.27E-63  | 0.045 | 4  | 12.3 | Q2 |
| IPI00879750;l | SNRPD3   | 26.9 | 4.01E-17  | 0.045 | 10 | 8.9  | Q2 |
| IPI00794659;l | RPS20    | 24.6 | 2.19E-45  | 0.045 | 13 | 10.7 | Q2 |
| IPI00922240   | ACTB     | 9.8  | <1.0E-304 | 0.045 | 12 | 13.6 | Q2 |
| IPI00023640;l | PDCD5    | 67.2 | 1.61E-62  | 0.045 | 21 | 10.0 | Q2 |
| IPI00306604   | ITGA5    | 10.5 | 5.89E-126 | 0.046 | 2  | 10.9 | Q2 |
| IPI00018871;l | ARL8B    | 26.9 | 1.11E-61  | 0.046 | 14 | 16.9 | Q2 |
| IPI00872533;l | CD2AP    | 8.5  | 1.73E-14  | 0.046 | 2  | 0.5  | Q2 |
| IPI00304082;l | ISOC1    | 29.2 | 1.82E-111 | 0.046 | 3  | 26.5 | Q2 |
| IPI00925251;l | SNRPG    | 22.1 | 1.92E-13  | 0.046 | 6  | 5.0  | Q2 |
| IPI00719079;l | PDDC1    | 7.2  | 7.11E-08  | 0.046 | 2  | 2.5  | Q2 |
| IPI00220503;l | DCTN2    | 44.8 | <1.0E-304 | 0.046 | 7  | 6.2  | Q2 |
| IPI00013219;l | ILK      | 19.5 | 1.13E-22  | 0.046 | 2  | 3.7  | Q2 |
| IPI00293533   | NUP62    | 2.7  | 3.59E-20  | 0.047 | 2  | 9.0  | Q2 |
| IPI00216318;l | YWHAB    | 34.1 | 2.88E-209 | 0.047 | 12 | 11.4 | Q2 |
| IPI00003269   | ACTBL2   | 8.5  | 1.84E-100 | 0.047 | 12 | 14.5 | Q2 |
| IPI00295386;l | CBR1     | 71.8 | <1.0E-304 | 0.047 | 21 | 5.8  | Q2 |
| IPI00025974;l | CHMP4B   | 32.6 | 9.90E-54  | 0.047 | 5  | 3.6  | Q2 |
| IPI00293817;l | NAPG     | 19.2 | 4.04E-19  | 0.048 | 3  | 5.9  | Q2 |
| IPI00456887;l | HNRNPUL2 | 31.3 | 2.30E-221 | 0.048 | 7  | 8.8  | Q2 |
| IPI00301518;l | MOBKL1B  | 29.2 | 4.62E-29  | 0.048 | 6  | 14.8 | Q2 |
| IPI00023510;l | RAB5A    | 24.2 | 1.45E-89  | 0.048 | 4  | 13.2 | Q2 |
| IPI00018931   | VPS35    | 29.9 | 9.49E-261 | 0.048 | 10 | 25.3 | Q2 |
| IPI00784090;l | CCT8     | 65.1 | <1.0E-304 | 0.048 | 33 | 19.6 | Q2 |
| IPI00798102;l | VPS29    | 23.5 | 6.06E-47  | 0.048 | 12 | 11.6 | Q2 |
| IPI00019997;l | LIN7C    | 31   | 1.49E-20  | 0.048 | 7  | 14.8 | Q2 |
| IPI00401264   | ERP44    | 30   | 1.25E-62  | 0.048 | 11 | 11.7 | Q2 |
| IPI00915363;l | RPS24    | 18.3 | 1.94E-65  | 0.048 | 11 | 11.9 | Q2 |
| IPI00019912;l | HSD17B4  | 20.1 | 1.15E-109 | 0.048 | 7  | 10.6 | Q2 |

|               |          |      |           |       |    |      |    |
|---------------|----------|------|-----------|-------|----|------|----|
| IPI00296190;l | C10orf58 | 27.5 | 3.39E-68  | 0.049 | 2  | 10.2 | Q2 |
| IPI00335001;l | HYPK     | 20.6 | 2.56E-06  | 0.049 | 2  | 24.3 | Q2 |
| IPI00018235   | PEF1     | 6.7  | 4.75E-11  | 0.049 | 2  | 1.8  | Q2 |
| IPI00386616   | C1orf212 | 39.1 | 6.62E-05  | 0.049 | 3  | 14.2 | Q2 |
| IPI00033600;l | PPP1R7   | 25.6 | 2.06E-109 | 0.049 | 4  | 12.0 | Q2 |
| IPI00399089;l | MESDC2   | 26.5 | 2.30E-19  | 0.049 | 8  | 10.7 | Q2 |
| IPI00871856;l | STIP1    | 54.7 | 2.90E-233 | 0.049 | 18 | 12.1 | Q2 |
| IPI00220301;l | PRDX6    | 63.8 | 3.41E-297 | 0.049 | 28 | 8.8  | Q2 |
| IPI00014232;l | ARL6IP1  | 6.9  | 4.40E-02  | 0.050 | 3  | 3.9  | Q2 |
| IPI00032003;l | EMD      | 46.1 | 7.35E-268 | 0.050 | 9  | 5.6  | Q2 |
| IPI00219861;l | ACP1     | 38.6 | 3.71E-91  | 0.050 | 6  | 9.4  | Q2 |
| IPI00003565;l | PSMD10   | 16.4 | 6.48E-13  | 0.050 | 5  | 6.7  | Q2 |
| IPI00293564;l | HMGCL    | 27.4 | 4.42E-108 | 0.050 | 5  | 8.9  | Q2 |
| IPI00014053;l | TOMM40   | 16.1 | 3.19E-30  | 0.050 | 5  | 6.9  | Q2 |
| IPI00023542;l | TMED9    | 20   | 2.50E-86  | 0.050 | 10 | 11.4 | Q2 |
| IPI00025019;l | PSMB1    | 53.1 | 3.67E-175 | 0.050 | 13 | 8.9  | Q2 |
| IPI00304925;l | HSPA1A   | 44.1 | <1.0E-304 | 0.051 | 23 | 13.3 | Q2 |
| IPI00332499;l | NASP     | 23.2 | 1.92E-183 | 0.051 | 3  | 4.7  | Q2 |
| IPI00008529;l | RPLP2    | 92.2 | <1.0E-304 | 0.051 | 18 | 17.7 | Q2 |
| IPI00911039   | HSPA1A   | 1.5  | <1.0E-304 | 0.051 | 2  | 9.2  | Q2 |
| IPI00658109;l | CKMT1A   | 50.8 | 1.95E-261 | 0.051 | 13 | 6.3  | Q2 |
| IPI00032849;l | NOP16    | 28.7 | 2.08E-21  | 0.051 | 2  | 13.5 | Q2 |
| IPI00098902;l | OGDH     | 25.1 | 8.02E-210 | 0.051 | 5  | 8.4  | Q2 |
| IPI00783313;l | PYGL     | 40.9 | <1.0E-304 | 0.052 | 17 | 13.3 | Q2 |
| IPI00182728;l | VPS4B    | 18   | 4.78E-37  | 0.052 | 5  | 3.4  | Q2 |
| IPI00023006;l | ACTC1    | 4.2  | 5.11E-170 | 0.052 | 12 | 15.9 | Q2 |
| IPI00001655;l | C16orf80 | 16.6 | 1.69E-37  | 0.052 | 3  | 3.3  | Q2 |
| IPI00025318;l | SH3BGRL  | 55.3 | 9.96E-93  | 0.053 | 12 | 18.4 | Q2 |
| IPI00160421   | MRPL18   | 22.2 | 1.09E-29  | 0.053 | 3  | 4.5  | Q2 |
| IPI00414320;l | ANXA11   | 27.4 | 2.10E-165 | 0.053 | 12 | 9.4  | Q2 |
| IPI00021785   | COX5B    | 18.6 | 4.35E-18  | 0.053 | 4  | 19.2 | Q2 |
| IPI00645078;l | UBA1     | 43.3 | <1.0E-304 | 0.054 | 28 | 9.6  | Q2 |
| IPI00303753   | C1orf163 | 7.4  | 1.02E-03  | 0.054 | 2  | 5.4  | Q2 |
| IPI00418262;l | ALDOC    | 14.4 | 1.02E-276 | 0.054 | 3  | 3.2  | Q2 |
| IPI00008274;l | CAP1     | 61.9 | <1.0E-304 | 0.054 | 53 | 12.5 | Q2 |

|               |              |      |           |       |    |      |    |
|---------------|--------------|------|-----------|-------|----|------|----|
| IPI00034049;l | UPF1         | 41.5 | 2.88E-235 | 0.055 | 4  | 11.8 | Q2 |
| IPI00216654;l | NOLC1        | 11.1 | 2.64E-28  | 0.055 | 4  | 32.6 | Q2 |
| IPI00219518;l | ARL1         | 34.3 | 3.35E-29  | 0.055 | 4  | 10.9 | Q2 |
| IPI00027422;l | ITGB4        | 29.4 | <1.0E-304 | 0.055 | 4  | 42.9 | Q2 |
| IPI00100796   | CHMP5        | 28.3 | 9.16E-131 | 0.055 | 5  | 13.1 | Q2 |
| IPI00220766   | GLO1         | 61.4 | 7.74E-107 | 0.055 | 12 | 12.8 | Q2 |
| IPI00218693;l | APRT         | 62.8 | 1.04E-55  | 0.055 | 16 | 17.9 | Q2 |
| IPI00216247;l | PSMD4        | 16.6 | 2.00E-87  | 0.055 | 3  | 15.2 | Q2 |
| IPI00005087;l | TMOD3        | 44.3 | 1.38E-300 | 0.055 | 8  | 9.5  | Q2 |
| IPI00007797;l | FABP5        | 60.7 | 2.76E-88  | 0.055 | 29 | 12.3 | Q2 |
| IPI00925052;l | ARPC4        | 31.6 | 3.52E-30  | 0.056 | 20 | 13.8 | Q2 |
| IPI00025084;l | CAPNS1       | 51.9 | 3.51E-204 | 0.056 | 24 | 8.7  | Q2 |
| IPI00304596;l | NONO         | 37.2 | 8.87E-256 | 0.056 | 11 | 15.4 | Q2 |
| IPI00382452;l | CHMP1A       | 26.5 | 2.67E-09  | 0.056 | 8  | 23.0 | Q2 |
| IPI00291928;l | RAB14        | 64.2 | 1.46E-156 | 0.056 | 12 | 11.2 | Q2 |
| IPI00016513   | RAB10        | 50   | 6.51E-111 | 0.056 | 9  | 4.7  | Q2 |
| IPI00794402;l | ARHGDI A     | 37.3 | 2.31E-243 | 0.057 | 13 | 6.5  | Q2 |
| IPI00009480;l | COPS8        | 34.9 | 7.18E-82  | 0.057 | 3  | 8.3  | Q2 |
| IPI00289758;l | CAPN2        | 35.3 | 4.69E-300 | 0.057 | 16 | 8.3  | Q2 |
| IPI00477495   | H2BFS        | 75.4 | 3.13E-73  | 0.057 | 43 | 18.0 | Q2 |
| IPI00027240;l | GNG5         | 47.1 | 3.25E-11  | 0.058 | 5  | 6.9  | Q2 |
| IPI00909772;l | AP2M1        | 19.8 | 8.80E-32  | 0.058 | 3  | 4.3  | Q2 |
| IPI00376478   | CMC1         | 9.4  | 6.05E-03  | 0.058 | 2  | 2.3  | Q2 |
| IPI00872773;l | ERO1L        | 40   | 1.63E-212 | 0.058 | 11 | 17.3 | Q2 |
| IPI00022477   | BCL10        | 15   | 4.26E-15  | 0.058 | 4  | 4.7  | Q2 |
| IPI00020956;l | HDGF         | 45   | 2.30E-90  | 0.058 | 12 | 10.4 | Q2 |
| IPI00007426;l | ARL6IP5      | 24.5 | 4.59E-12  | 0.059 | 4  | 12.0 | Q2 |
| IPI00914048;l | C11orf68     | 11.6 | 7.37E-07  | 0.059 | 2  | 6.0  | Q2 |
| IPI00470502;l | PPA2         | 30.1 | 6.92E-89  | 0.059 | 5  | 8.7  | Q2 |
| IPI00015972;l | COX6C        | 42.7 | 3.22E-06  | 0.059 | 10 | 18.8 | Q2 |
| IPI00795627;l | MRPL3        | 10.7 | 1.77E-08  | 0.059 | 5  | 11.1 | Q2 |
| IPI00005692   | MRPS12       | 12.3 | 2.58E-03  | 0.059 | 2  | 2.2  | Q2 |
| IPI00784614;l | Ov/Br septin | 33.4 | 5.81E-240 | 0.060 | 8  | 14.3 | Q2 |
| IPI00399265;l | TPD52L2      | 52.8 | <1.0E-304 | 0.060 | 17 | 7.6  | Q2 |
| IPI00218319;l | TPM3         | 72.6 | 3.78E-271 | 0.060 | 52 | 13.5 | Q2 |

|               |         |      |           |       |    |      |    |
|---------------|---------|------|-----------|-------|----|------|----|
| IPI00220709;C | TPM2    | 26.1 | 1.05E-121 | 0.060 | 7  | 10.7 | Q2 |
| IPI00796366;I | MYL6    | 45   | 1.30E-182 | 0.061 | 48 | 14.0 | Q2 |
| IPI00654820;I | MT      | 6.8  | 3.38E-04  | 0.061 | 2  | 0.5  | Q2 |
| IPI00305978;I | AKR7A2  | 18.4 | 3.51E-158 | 0.061 | 5  | 9.4  | Q2 |
| IPI00021129;I | AP3B1   | 26.1 | 2.40E-128 | 0.061 | 3  | 7.1  | Q2 |
| IPI00239077;I | HINT1   | 23.8 | 5.03E-28  | 0.061 | 7  | 9.4  | Q2 |
| IPI00021263;I | YWHAZ   | 62.9 | <1.0E-304 | 0.061 | 59 | 12.4 | Q2 |
| IPI00029744;I | SSBP1   | 43.2 | 1.32E-122 | 0.061 | 14 | 5.2  | Q2 |
| IPI00298406;I | HADH    | 20   | 3.57E-43  | 0.062 | 8  | 3.2  | Q2 |
| IPI00001960;I | CLIC4   | 58.5 | 1.24E-157 | 0.062 | 13 | 9.8  | Q2 |
| IPI00329512;I | SNRPB   | 20.8 | 4.38E-91  | 0.062 | 18 | 14.5 | Q2 |
| IPI00003327   | ARL3    | 47.3 | 5.50E-112 | 0.062 | 6  | 6.7  | Q2 |
| IPI00374364;I | C7orf59 | 8.4  | 2.71E-08  | 0.062 | 6  | 21.1 | Q2 |
| IPI00028946;I | RTN3    | 15.3 | 3.43E-18  | 0.062 | 2  | 7.0  | Q2 |
| IPI00013004;I | PDXK    | 22.1 | 2.13E-88  | 0.062 | 7  | 7.9  | Q2 |
| IPI00927658;I | RPL32   | 47.7 | 2.94E-74  | 0.062 | 14 | 50.9 | Q2 |
| IPI00103252;I | RWDD4A  | 15.4 | 5.22E-09  | 0.063 | 2  | 14.0 | Q2 |
| IPI00002926;I | VPS37B  | 34.7 | 1.46E-150 | 0.063 | 4  | 10.4 | Q2 |
| IPI00027014;I | DCTN3   | 36   | 1.15E-17  | 0.063 | 8  | 7.1  | Q2 |
| IPI00026182;I | CAPZA2  | 31.5 | 1.31E-73  | 0.063 | 7  | 13.0 | Q2 |
| IPI00890743;I | PPP6C   | 25.1 | 2.49E-90  | 0.064 | 4  | 12.4 | Q2 |
| IPI00003348;I | GNB2    | 27.9 | 1.63E-164 | 0.064 | 15 | 10.7 | Q2 |
| IPI00005657;I | PFDN6   | 53.5 | 1.77E-44  | 0.064 | 10 | 12.8 | Q2 |
| IPI00009790;I | PFKP    | 38.4 | <1.0E-304 | 0.064 | 16 | 6.4  | Q2 |
| IPI00019869;I | S100A2  | 54.1 | 9.02E-141 | 0.065 | 32 | 14.3 | Q2 |
| IPI00022442   | NDUFAB1 | 15.4 | 1.97E-06  | 0.065 | 6  | 4.8  | Q2 |
| IPI00011284;I | COMT    | 28.4 | 2.13E-162 | 0.065 | 7  | 11.0 | Q2 |
| IPI00216691;C | PFN1    | 90   | 9.26E-275 | 0.065 | 55 | 8.3  | Q2 |
| IPI00743335;I | MYO1C   | 37.1 | <1.0E-304 | 0.065 | 14 | 10.3 | Q2 |
| IPI00397947;I | UBE2V1  | 22.7 | 1.12E-34  | 0.065 | 20 | 7.2  | Q2 |
| IPI00219219;I | LGALS1  | 71.9 | 1.10E-255 | 0.066 | 43 | 8.0  | Q2 |
| IPI00027981   | RAB38   | 21.2 | 8.73E-36  | 0.066 | 3  | 14.0 | Q2 |
| IPI00008418;I | DIABLO  | 16.5 | 4.62E-27  | 0.066 | 4  | 8.3  | Q2 |
| IPI00002459;I | ANXA6   | 50.5 | 7.25E-281 | 0.066 | 18 | 28.4 | Q2 |
| IPI00465028;I | TPI1    | 71.7 | <1.0E-304 | 0.066 | 38 | 11.1 | Q2 |

|               |          |      |           |       |    |      |    |
|---------------|----------|------|-----------|-------|----|------|----|
| IPI00293126;l | TBCB     | 47.5 | 2.64E-103 | 0.067 | 13 | 10.0 | Q2 |
| IPI00376344;l | MYO1B    | 39.3 | <1.0E-304 | 0.067 | 19 | 8.0  | Q2 |
| IPI00794543;l | CALM1    | 59.9 | 1.26E-255 | 0.067 | 23 | 11.2 | Q2 |
| IPI00019903;l | CCDC44   | 13.8 | 2.78E-28  | 0.067 | 3  | 13.3 | Q2 |
| IPI00003386   | RBX1     | 24.1 | 8.15E-49  | 0.067 | 4  | 7.9  | Q2 |
| IPI00219452;l | ACOT7    | 43.5 | 3.05E-204 | 0.067 | 16 | 7.5  | Q2 |
| IPI00007321;l | LYPLA1   | 17.5 | 3.42E-49  | 0.067 | 3  | 3.2  | Q2 |
| IPI00465132;l | COPE     | 58.8 | <1.0E-304 | 0.067 | 9  | 7.2  | Q2 |
| IPI00418603   | UBE2R2   | 12.2 | 3.58E-12  | 0.067 | 3  | 10.8 | Q2 |
| IPI00023673;l | LGALS3BP | 12.8 | 1.15E-39  | 0.067 | 3  | 6.8  | Q2 |
| IPI00843975;l | EZR      | 40.8 | 1.03E-291 | 0.068 | 25 | 10.8 | Q2 |
| IPI00010779;l | TPM4     | 46.4 | 1.51E-235 | 0.068 | 30 | 16.8 | Q2 |
| IPI00453473   | HIST1H4A | 53.4 | 2.75E-80  | 0.068 | 72 | 29.5 | Q2 |
| IPI00413778;l | FKBP1A   | 31   | 9.52E-66  | 0.068 | 9  | 13.7 | Q2 |
| IPI00654744;l | SYNGR2   | 13.8 | 1.66E-11  | 0.068 | 4  | 9.3  | Q2 |
| IPI00000684;l | UAP1     | 24.5 | 2.57E-104 | 0.068 | 8  | 7.2  | Q2 |
| IPI00719040;l | C1orf77  | 11.6 | 4.32E-07  | 0.068 | 2  | 1.1  | Q2 |
| IPI00296526;l | NAGK     | 40.3 | 4.02E-187 | 0.069 | 11 | 13.2 | Q2 |
| IPI00329629;l | DNAJC7   | 10.3 | 2.65E-15  | 0.069 | 2  | 3.4  | Q2 |
| IPI00018236   | GM2A     | 22.8 | 7.63E-07  | 0.069 | 6  | 11.0 | Q2 |
| IPI00914529;l | RPL28    | 32.5 | 2.68E-27  | 0.069 | 26 | 11.6 | Q2 |
| IPI00307162;l | VCL      | 59.7 | <1.0E-304 | 0.070 | 31 | 40.0 | Q2 |
| IPI00291946;l | USP10    | 14.8 | 6.64E-87  | 0.070 | 3  | 27.4 | Q2 |
| IPI00299904;l | MCM7     | 20.3 | 1.32E-86  | 0.070 | 2  | 27.9 | Q2 |
| IPI00169383;l | PGK1     | 76.3 | <1.0E-304 | 0.070 | 49 | 12.9 | Q2 |
| IPI00871174;l | MYCBP    | 29.4 | 3.56E-14  | 0.071 | 6  | 12.6 | Q2 |
| IPI00003949;l | UBE2N    | 57.9 | 1.49E-111 | 0.071 | 16 | 20.3 | Q2 |
| IPI00012837;l | KIF5B    | 43   | <1.0E-304 | 0.071 | 9  | 25.6 | Q2 |
| IPI00023598;l | TUBB4    | 9.7  | <1.0E-304 | 0.071 | 9  | 21.6 | Q2 |
| IPI00007752;l | TUBB2C   | 19.3 | <1.0E-304 | 0.071 | 25 | 12.7 | Q2 |
| IPI00479877;l | ALDH9A1  | 23.6 | 6.05E-121 | 0.071 | 5  | 14.4 | Q2 |
| IPI00007166   | IER3IP1  | 9.8  | 1.68E-02  | 0.071 | 4  | 6.5  | Q2 |
| IPI00246058;l | PDCD6IP  | 42.2 | <1.0E-304 | 0.071 | 20 | 10.1 | Q2 |
| IPI00396563;l | UBXN1    | 17.6 | 1.34E-13  | 0.072 | 3  | 11.6 | Q2 |
| IPI00334159   | VBP1     | 33.5 | 2.12E-59  | 0.072 | 8  | 8.3  | Q2 |

|               |          |      |           |       |     |      |    |
|---------------|----------|------|-----------|-------|-----|------|----|
| IPI00005969;l | CAPZA1   | 66.4 | 3.69E-200 | 0.072 | 16  | 9.6  | Q2 |
| IPI00171611;l | HIST2H3A | 57.4 | 2.41E-31  | 0.072 | 40  | 10.3 | Q2 |
| IPI00026570;l | COX7A2   | 20   | 8.32E-33  | 0.072 | 2   | 8.2  | Q2 |
| IPI00015954;l | SAR1A    | 43.9 | 1.48E-56  | 0.072 | 7   | 12.7 | Q2 |
| IPI00013808;l | ACTN4    | 74   | <1.0E-304 | 0.072 | 86  | 10.8 | Q2 |
| IPI00022744;l | CSE1L    | 39.2 | <1.0E-304 | 0.072 | 27  | 21.3 | Q2 |
| IPI00013890;l | SFN      | 67.7 | 2.31E-284 | 0.072 | 73  | 15.4 | Q2 |
| IPI00026964;l | UQCRFS1  | 24.5 | 5.58E-30  | 0.073 | 8   | 11.0 | Q2 |
| IPI00219005   | FKBP4    | 66.2 | <1.0E-304 | 0.073 | 11  | 25.9 | Q2 |
| IPI00009867;l | KRT5     | 46.8 | <1.0E-304 | 0.073 | 210 | 20.6 | Q2 |
| IPI00218187;l | PPP1CC   | 7.1  | 1.25E-300 | 0.073 | 3   | 2.7  | Q2 |
| IPI00332395;l | CPNE9    | 1.6  | 6.43E-04  | 0.074 | 4   | 4.5  | Q2 |
| IPI00007750;l | TUBA4A   | 15   | <1.0E-304 | 0.074 | 9   | 4.9  | Q2 |
| IPI00333541;l | FLNA     | 58.3 | <1.0E-304 | 0.074 | 27  | 13.2 | Q2 |
| IPI00218728;l | PAFAH1B1 | 20.2 | 6.13E-78  | 0.074 | 2   | 8.2  | Q2 |
| IPI00298547   | PARK7    | 75.7 | 1.20E-210 | 0.074 | 25  | 8.2  | Q2 |
| IPI00031397;l | ACSL3    | 20.4 | 1.76E-214 | 0.074 | 2   | 5.7  | Q2 |
| IPI00783736;l | PTMS     | 16.4 | 1.84E-12  | 0.074 | 2   | 2.6  | Q2 |
| IPI00018146;l | YWHAQ    | 48.2 | <1.0E-304 | 0.074 | 21  | 7.0  | Q2 |
| IPI00218343;l | TUBA1C   | 12.2 | <1.0E-304 | 0.075 | 8   | 17.6 | Q2 |
| IPI00000816;l | YWHAE    | 75.7 | <1.0E-304 | 0.075 | 70  | 23.3 | Q2 |
| IPI00018783;l | ITPA     | 32.5 | 9.41E-56  | 0.075 | 3   | 0.5  | Q2 |
| IPI00642374;l | UCHL5    | 17.1 | 2.22E-21  | 0.075 | 4   | 6.9  | Q2 |
| IPI00647885;l | GSTM1    | 28.7 | 2.39E-49  | 0.075 | 5   | 9.3  | Q2 |
| IPI00009771;l | LMNB2    | 36.3 | 4.14E-199 | 0.075 | 11  | 12.0 | Q2 |
| IPI00026087;l | BANF1    | 42.7 | 1.96E-29  | 0.075 | 6   | 9.3  | Q2 |
| IPI00024364;l | TNPO1    | 22.4 | 9.56E-177 | 0.075 | 8   | 10.1 | Q2 |
| IPI00396329;l | BXDC1    | 19.3 | 1.06E-15  | 0.076 | 3   | 6.2  | Q2 |
| IPI00172591   | MRPL17   | 34.3 | 1.11E-10  | 0.076 | 8   | 10.3 | Q2 |
| IPI00877662;l | RAB13    | 12.5 | 2.79E-56  | 0.076 | 3   | 5.0  | Q2 |
| IPI00219365;l | MSN      | 62   | <1.0E-304 | 0.076 | 44  | 9.6  | Q2 |
| IPI00152998   | LRRC40   | 16.6 | 1.90E-35  | 0.076 | 2   | 3.2  | Q2 |
| IPI00017596;l | MAPRE1   | 39.2 | 7.51E-181 | 0.076 | 13  | 7.0  | Q2 |
| IPI00216134;l | TPM1     | 28.2 | 3.03E-70  | 0.076 | 8   | 93.2 | Q2 |
| IPI00021327;l | GRB2     | 48.4 | 1.33E-44  | 0.077 | 8   | 9.2  | Q2 |



|               |          |      |           |       |    |      |    |
|---------------|----------|------|-----------|-------|----|------|----|
| IPI00450472;l | UBE2I    | 33.7 | 6.77E-126 | 0.077 | 9  | 8.3  | Q2 |
| IPI00874200;l | MRPS33   | 31.2 | 1.37E-06  | 0.077 | 4  | 17.4 | Q2 |
| IPI00005160;l | ARPC1B   | 43.3 | 1.02E-103 | 0.077 | 12 | 12.7 | Q2 |
| IPI00105620;l | RRAGA    | 16.3 | 3.44E-26  | 0.078 | 4  | 3.9  | Q2 |
| IPI00016342;l | RAB7A    | 85   | 7.10E-230 | 0.078 | 29 | 12.6 | Q2 |
| IPI00010207;l | UFM1     | 35.3 | 5.65E-04  | 0.078 | 4  | 7.3  | Q2 |
| IPI00297982;l | EIF2S3   | 42.2 | 3.18E-168 | 0.078 | 9  | 12.0 | Q2 |
| IPI00465256;l | AK3      | 21.1 | 3.38E-74  | 0.079 | 5  | 14.5 | Q2 |
| IPI00290198   | IL18     | 31.6 | 3.70E-60  | 0.079 | 7  | 8.2  | Q2 |
| IPI00028412   | SSSCA1   | 15.1 | 1.31E-04  | 0.079 | 2  | 16.6 | Q2 |
| IPI00815770;l | SNX3     | 46.3 | 1.82E-27  | 0.079 | 14 | 6.0  | Q2 |
| IPI00005585   | TAX1BP3  | 35.5 | 1.44E-72  | 0.079 | 12 | 7.8  | Q2 |
| IPI00449049;l | PARP1    | 23.4 | 2.46E-156 | 0.080 | 6  | 7.7  | Q2 |
| IPI00645446;l | MCTS1    | 46.7 | 2.46E-157 | 0.080 | 7  | 7.8  | Q2 |
| IPI00746004;l | RPS27L   | 13.1 | 7.06E-16  | 0.080 | 3  | 9.4  | Q2 |
| IPI00005537;l | MRPL12   | 39.9 | 1.44E-52  | 0.080 | 10 | 17.4 | Q2 |
| IPI00927606;l | GPX1     | 73.9 | 5.74E-175 | 0.080 | 14 | 9.2  | Q2 |
| IPI00479722;l | PSME1    | 49   | 4.98E-264 | 0.080 | 22 | 8.1  | Q2 |
| IPI00019899;l | SC4MOL   | 11.3 | 5.52E-44  | 0.080 | 2  | 3.7  | Q2 |
| IPI00029447;l | GOSR1    | 12   | 1.12E-18  | 0.080 | 5  | 23.2 | Q2 |
| IPI00006552;l | CNOT7    | 11.9 | 4.59E-17  | 0.081 | 2  | 4.8  | Q2 |
| IPI00221232;l | GNG12    | 76.4 | 1.36E-51  | 0.081 | 9  | 8.1  | Q2 |
| IPI00000005   | NRAS     | 39.2 | 2.94E-54  | 0.081 | 3  | 3.9  | Q2 |
| IPI00020319;l | BLOC1S1  | 19.6 | 4.83E-17  | 0.081 | 2  | 15.8 | Q2 |
| IPI00398272;l | COL17A1  | 10   | 5.44E-61  | 0.081 | 14 | 14.4 | Q2 |
| IPI00026546;l | PAFAH1B2 | 27.1 | 3.38E-188 | 0.082 | 6  | 6.8  | Q2 |
| IPI00007675;l | DYNC1LI1 | 11.3 | 7.38E-59  | 0.082 | 4  | 17.6 | Q2 |
| IPI00444937;l | TRAPPC2L | 13.6 | 1.07E-06  | 0.082 | 3  | 9.0  | Q2 |
| IPI00219217;l | LDHB     | 54.8 | <1.0E-304 | 0.082 | 62 | 13.6 | Q2 |
| IPI00010706;l | GSS      | 24.5 | 1.23E-47  | 0.082 | 2  | 13.3 | Q2 |
| IPI00257882;l | PEPD     | 9.1  | 1.04E-40  | 0.082 | 2  | 6.8  | Q2 |
| IPI00002535   | FKBP2    | 19   | 7.78E-30  | 0.082 | 3  | 23.0 | Q2 |
| IPI00479997;l | STMN1    | 63.1 | 1.33E-53  | 0.082 | 14 | 12.1 | Q2 |
| IPI00513853;l | STX12    | 16.7 | 9.32E-54  | 0.083 | 3  | 8.2  | Q2 |
| IPI00448798;l | CSNK1A1  | 37.5 | 3.77E-108 | 0.083 | 12 | 6.6  | Q2 |

|               |                |      |           |       |     |      |    |
|---------------|----------------|------|-----------|-------|-----|------|----|
| IPI00016670   | C11orf59       | 46   | 1.08E-97  | 0.083 | 4   | 7.2  | Q2 |
| IPI00647915;l | TAGLN2         | 71.8 | 4.77E-269 | 0.083 | 53  | 11.2 | Q2 |
| IPI00016801;l | GLUD1          | 46.2 | 2.31E-274 | 0.083 | 8   | 15.7 | Q2 |
| IPI00644674;l | NUBP2          | 23.6 | 6.33E-22  | 0.083 | 3   | 5.4  | Q2 |
| IPI00215901;l | AK2            | 63.2 | 4.62E-137 | 0.084 | 16  | 11.6 | Q2 |
| IPI00418169;l | DKFZp686P03159 | 74.2 | <1.0E-304 | 0.084 | 219 | 14.0 | Q2 |
| IPI00010214   | S100A14        | 61.5 | 1.23E-85  | 0.084 | 13  | 4.6  | Q2 |
| IPI00029997;l | PGLS           | 59.7 | 8.72E-195 | 0.085 | 12  | 14.9 | Q2 |
| IPI00644697;l | HEBP2          | 35   | 1.01E-110 | 0.085 | 9   | 15.5 | Q2 |
| IPI00219034   | NDUFA8         | 51.2 | 6.38E-63  | 0.085 | 4   | 4.2  | Q2 |
| IPI00413451;l | DKFZp686I04222 | 37.4 | 2.37E-109 | 0.085 | 8   | 9.7  | Q2 |
| IPI00034319;l | CUTA           | 14.1 | 1.75E-14  | 0.086 | 3   | 14.2 | Q2 |
| IPI00217467   | HIST1H1E       | 15.5 | 6.90E-76  | 0.086 | 2   | 10.1 | Q2 |
| IPI00294911   | SDHB           | 33.2 | 7.05E-47  | 0.086 | 5   | 11.7 | Q2 |
| IPI00027096;l | MRPL19         | 21.6 | 9.39E-21  | 0.087 | 4   | 12.5 | Q2 |
| IPI00021405;l | LMNA           | 65.4 | <1.0E-304 | 0.087 | 65  | 10.7 | Q2 |
| IPI00017763;l | NAP1L4         | 33.7 | 1.11E-255 | 0.087 | 5   | 5.8  | Q2 |
| IPI00031564;l | GGCT           | 43.1 | 3.05E-79  | 0.087 | 6   | 8.6  | Q2 |
| IPI00022810;l | CTSC           | 26.6 | 2.11E-272 | 0.087 | 8   | 4.5  | Q2 |
| IPI00793199;l | ANXA4          | 61.1 | 4.33E-267 | 0.087 | 26  | 8.0  | Q2 |
| IPI00294501   | DHCR7          | 16.6 | 7.47E-49  | 0.087 | 5   | 7.3  | Q2 |
| IPI00428967;l | TIRAP3         | 8.4  | 1.84E-15  | 0.087 | 3   | 3.2  | Q2 |
| IPI00013466;l | ASNA1          | 19.8 | 1.99E-68  | 0.088 | 7   | 22.2 | Q2 |
| IPI00007346;l | PPIH           | 34.5 | 4.34E-31  | 0.088 | 9   | 18.3 | Q2 |
| IPI00024013;l | UBE2D3         | 12.2 | 7.61E-10  | 0.088 | 5   | 10.7 | Q2 |
| IPI00296259;l | TMED4          | 8.8  | 9.37E-72  | 0.088 | 2   | 14.7 | Q2 |
| IPI00009247;l | MP68           | 25.3 | 7.19E-02  | 0.088 | 4   | 10.9 | Q2 |
| IPI00900293   | FLNB           | 62.1 | <1.0E-304 | 0.088 | 49  | 12.1 | Q2 |
| IPI00007084   | SLC25A13       | 21   | 5.83E-192 | 0.088 | 3   | 4.4  | Q2 |
| IPI00644231;l | CYFIP1         | 26   | 8.54E-223 | 0.088 | 3   | 3.2  | Q2 |
| IPI00218918;l | ANXA1          | 78.6 | <1.0E-304 | 0.088 | 100 | 12.9 | Q2 |
| IPI00329591;l | RMND1          | 5.8  | 1.80E-06  | 0.089 | 2   | 7.9  | Q2 |
| IPI00030770;l | PSMG1          | 26.4 | 7.33E-32  | 0.090 | 2   | 7.0  | Q2 |
| IPI00002324;l | MAT2B          | 19.5 | 3.09E-51  | 0.090 | 5   | 7.4  | Q2 |
| IPI00290279;l | ADK            | 29.8 | 1.41E-95  | 0.090 | 11  | 6.6  | Q2 |

|               |            |      |           |       |    |      |    |
|---------------|------------|------|-----------|-------|----|------|----|
| IPI00643567   | CAP1       | 9.2  | <1.0E-304 | 0.091 | 4  | 3.7  | Q2 |
| IPI00014376;l | RAB31      | 23.1 | 4.58E-25  | 0.091 | 4  | 36.6 | Q2 |
| IPI00004324;l | TRAPPC3    | 36.1 | 1.75E-38  | 0.091 | 8  | 10.9 | Q2 |
| IPI00172594;l | MRPL28     | 8.2  | 1.93E-04  | 0.091 | 2  | 5.2  | Q2 |
| IPI00030706   | AHSA1      | 40.8 | 1.44E-113 | 0.092 | 4  | 9.3  | Q2 |
| IPI00604523;l | MYL12B     | 49.7 | 5.34E-126 | 0.092 | 26 | 7.0  | Q2 |
| IPI00024095;l | ANXA3      | 72.8 | 1.30E-281 | 0.092 | 33 | 11.8 | Q2 |
| IPI00871890;l | PICALM     | 14.8 | 4.56E-154 | 0.092 | 2  | 3.5  | Q2 |
| IPI00855767;l | RAP1GDS1   | 15.1 | 6.29E-155 | 0.092 | 5  | 13.4 | Q2 |
| IPI00218268;l | OPRS1      | 12.1 | 4.37E-04  | 0.093 | 3  | 0.4  | Q2 |
| IPI00020124;l | PI4K2A     | 16.5 | 1.41E-24  | 0.093 | 6  | 12.9 | Q2 |
| IPI00031461;l | GDI2       | 70.8 | <1.0E-304 | 0.093 | 30 | 20.7 | Q2 |
| IPI00260715;l | FUS        | 13.3 | 2.24E-62  | 0.093 | 6  | 9.6  | Q2 |
| IPI00473047;l | PRKAG1     | 22.9 | 3.50E-101 | 0.094 | 5  | 15.5 | Q2 |
| IPI00216457;l | HIST2H2AA3 | 62.3 | 1.91E-91  | 0.094 | 30 | 14.4 | Q2 |
| IPI00017592   | LETM1      | 16.1 | 4.40E-88  | 0.094 | 6  | 9.6  | Q2 |
| IPI00018813;l | COPS2      | 29.1 | 1.86E-77  | 0.095 | 5  | 3.2  | Q2 |
| IPI00550682;l | GRHPR      | 34.6 | 6.37E-163 | 0.095 | 6  | 8.2  | Q2 |
| IPI00019755;l | GSTO1      | 49.8 | 1.21E-60  | 0.095 | 19 | 9.1  | Q2 |
| IPI00029601;l | CTTN       | 27.8 | 2.01E-212 | 0.095 | 10 | 11.4 | Q2 |
| IPI00550037   | MRPS15     | 6.2  | 1.40E-01  | 0.095 | 2  | 1.6  | Q2 |
| IPI00010810;l | ETFA       | 48.3 | 2.23E-253 | 0.096 | 12 | 10.8 | Q2 |
| IPI00219229;F | LSM3       | 25.5 | 3.47E-06  | 0.096 | 8  | 13.5 | Q2 |
| IPI00257508;l | DPYSL2     | 26.6 | 6.22E-173 | 0.096 | 7  | 17.8 | Q2 |
| IPI00033022;l | DNM2       | 20.2 | 9.65E-74  | 0.096 | 6  | 11.5 | Q2 |
| IPI00032826;l | ST13       | 24.9 | 9.13E-90  | 0.096 | 9  | 4.9  | Q2 |
| IPI00872352;l | HDDC2      | 11.8 | 1.03E-12  | 0.096 | 2  | 9.6  | Q2 |
| IPI00004406;l | UPP1       | 41.3 | 2.96E-112 | 0.096 | 15 | 8.4  | Q2 |
| IPI00056357   | C19orf10   | 37   | 6.53E-49  | 0.097 | 11 | 17.1 | Q2 |
| IPI00025086   | COX5A      | 21.3 | 2.55E-47  | 0.097 | 3  | 5.4  | Q2 |
| IPI00017292;l | CTNNB1     | 21.9 | 1.32E-179 | 0.097 | 4  | 8.7  | Q2 |
| IPI00395605;l | ARHGEF1    | 11.5 | 8.53E-84  | 0.097 | 2  | 21.6 | Q2 |
| IPI00304435;l | NIPSNAP1   | 18.7 | 1.18E-13  | 0.097 | 4  | 6.4  | Q2 |
| IPI00015911;l | DLD        | 24.2 | 1.43E-285 | 0.097 | 8  | 15.4 | Q2 |
| IPI00015947;l | DNAJB1     | 42.9 | 5.81E-93  | 0.098 | 8  | 14.7 | Q2 |

|               |           |      |           |       |    |      |    |
|---------------|-----------|------|-----------|-------|----|------|----|
| IPI00182540;l | CTNND1    | 29.5 | 2.70E-299 | 0.098 | 8  | 18.9 | Q2 |
| IPI00012202;l | WDR77     | 10.5 | 1.77E-48  | 0.098 | 2  | 4.8  | Q2 |
| IPI00000792;l | CRYZ      | 42.6 | 9.84E-41  | 0.098 | 10 | 14.2 | Q2 |
| IPI00219757;l | GSTP1     | 67.1 | <1.0E-304 | 0.098 | 29 | 14.5 | Q2 |
| IPI00747810;l | FSCN1     | 55.2 | <1.0E-304 | 0.098 | 53 | 13.2 | Q2 |
| IPI00872214;l | TBCA      | 49.3 | 2.40E-65  | 0.098 | 16 | 9.4  | Q2 |
| IPI00410162;l | TCEB2     | 43.5 | 1.42E-56  | 0.099 | 24 | 10.8 | Q2 |
| IPI00465315;l | CYCS      | 39   | 2.49E-47  | 0.099 | 17 | 14.4 | Q2 |
| IPI00550069   | RNH1      | 56.6 | <1.0E-304 | 0.099 | 17 | 13.9 | Q2 |
| IPI00215948;l | CTNNA1    | 51   | <1.0E-304 | 0.099 | 24 | 13.0 | Q2 |
| IPI00005264;l | PKP2      | 21.2 | 3.45E-138 | 0.100 | 2  | 8.2  | Q2 |
| IPI00023086;l | MRPL15    | 23   | 1.55E-83  | 0.100 | 2  | 0.6  | Q2 |
| IPI00012585   | HEXB      | 29.5 | 1.27E-75  | 0.100 | 19 | 10.6 | Q2 |
| IPI00178431;l | RECQL     | 19.3 | 6.23E-50  | 0.100 | 3  | 19.0 | Q2 |
| IPI00024129;l | PPIC      | 16   | 1.61E-28  | 0.100 | 4  | 7.4  | Q2 |
| IPI00414554   | ARPC5L    | 34.6 | 2.85E-45  | 0.101 | 8  | 14.9 | Q2 |
| IPI00166865   | CISD2     | 47.4 | 8.33E-49  | 0.101 | 9  | 10.4 | Q2 |
| IPI00903226;l | HK1       | 40.1 | <1.0E-304 | 0.102 | 17 | 16.6 | Q2 |
| IPI00332157   | MRPL54    | 7.2  | 4.76E-04  | 0.102 | 2  | 5.8  | Q2 |
| IPI00017342   | RHOG      | 45   | 5.19E-155 | 0.102 | 8  | 10.4 | Q2 |
| IPI00745568;l | TIPRL     | 23.9 | 6.16E-28  | 0.102 | 3  | 22.4 | Q2 |
| IPI00304267;l | NXN       | 17.5 | 2.35E-151 | 0.102 | 5  | 7.8  | Q2 |
| IPI00874144;l | MRPS6     | 29.6 | 1.13E-17  | 0.103 | 11 | 11.7 | Q2 |
| IPI00328415;l | CYB5R3    | 45.5 | 6.12E-226 | 0.103 | 12 | 9.7  | Q2 |
| IPI00010270;l | RAC2      | 22.9 | 1.84E-136 | 0.104 | 9  | 11.7 | Q2 |
| IPI00031023;l | FLII      | 24.5 | 3.71E-238 | 0.104 | 3  | 14.7 | Q2 |
| IPI00217477;l | HMGB3     | 37   | 9.91E-52  | 0.104 | 9  | 13.4 | Q2 |
| IPI00914566;l | FDPS      | 20.3 | 1.83E-83  | 0.104 | 9  | 15.7 | Q2 |
| IPI00396378;l | HNRNPA2B1 | 2.5  | 1.29E-302 | 0.104 | 2  | 3.6  | Q2 |
| IPI00290461;l | EIF3J     | 28.3 | 8.58E-43  | 0.105 | 7  | 7.5  | Q2 |
| IPI00235412;l | DNM1L     | 39.3 | <1.0E-304 | 0.106 | 16 | 15.3 | Q2 |
| IPI00855856;l | API5      | 18.3 | 1.35E-119 | 0.106 | 2  | 12.9 | Q2 |
| IPI00063962;l | DPCD      | 27.1 | 3.15E-22  | 0.106 | 3  | 5.5  | Q2 |
| IPI00106966;l | TMEM70    | 11.2 | 1.41E-07  | 0.106 | 3  | 6.1  | Q2 |
| IPI00018188;l | NECAP2    | 38   | 5.22E-95  | 0.107 | 5  | 13.1 | Q2 |

|               |               |      |           |       |    |      |    |
|---------------|---------------|------|-----------|-------|----|------|----|
| IPI00007682   | ATP6V1A       | 32.3 | 3.58E-176 | 0.107 | 8  | 18.8 | Q2 |
| IPI00006979   | LYRM4         | 31.9 | 1.95E-11  | 0.107 | 2  | 0.9  | Q2 |
| IPI00411356   | VPS4A         | 9.8  | 9.69E-17  | 0.109 | 2  | 1.2  | Q2 |
| IPI00294739;l | SAMHD1        | 6.5  | 1.74E-57  | 0.109 | 4  | 8.6  | Q2 |
| IPI00304306;l | DNAJC19       | 33.6 | 4.16E-08  | 0.109 | 4  | 9.7  | Q2 |
| IPI00514234;l | LAD1          | 25.7 | 6.66E-169 | 0.110 | 20 | 18.1 | Q2 |
| IPI00219772   | NDUFB7        | 14.6 | 4.20E-03  | 0.110 | 2  | 0.3  | Q2 |
| IPI00177509   | TRAPPC5       | 23.9 | 2.05E-09  | 0.110 | 2  | 0.1  | Q2 |
| IPI00873899;l | ABCF1         | 13.1 | 1.92E-130 | 0.110 | 2  | 11.3 | Q2 |
| IPI00022002;l | MRPS27        | 12.6 | 1.41E-22  | 0.111 | 2  | 14.3 | Q2 |
| IPI00218019;l | BSG           | 16.9 | 2.75E-62  | 0.111 | 3  | 7.4  | Q2 |
| IPI00008223;l | RAD23B        | 21.8 | 8.94E-141 | 0.111 | 7  | 5.9  | Q2 |
| IPI00032325;l | CSTA          | 77.6 | 8.68E-113 | 0.111 | 9  | 7.9  | Q2 |
| IPI00384857;l | HN1           | 31.5 | 1.49E-87  | 0.112 | 3  | 21.8 | Q2 |
| IPI00026314;l | GSN           | 43.6 | <1.0E-304 | 0.112 | 19 | 10.6 | Q2 |
| IPI00332511;l | PPP2R2A       | 19.7 | 6.67E-82  | 0.114 | 4  | 15.5 | Q2 |
| IPI00100193;l | DKFZp667D2317 | 7    | 1.25E-10  | 0.115 | 2  | 7.0  | Q2 |
| IPI00329672;l | MYO1E         | 27.2 | 1.13E-243 | 0.115 | 3  | 21.3 | Q2 |
| IPI00438170;l | SNX12         | 34.3 | 3.37E-37  | 0.115 | 8  | 12.3 | Q2 |
| IPI00386122;l | MOBK13        | 26.2 | 9.96E-18  | 0.116 | 2  | 0.3  | Q2 |
| IPI00023987;l | PPCS          | 22.5 | 1.71E-18  | 0.116 | 4  | 3.4  | Q2 |
| IPI00305383   | UQCRC2        | 32.9 | 2.36E-162 | 0.116 | 5  | 13.6 | Q2 |
| IPI00024157   | FKBP3         | 39.3 | 7.53E-93  | 0.117 | 8  | 4.7  | Q2 |
| IPI00444945;l | BAX           | 34.4 | 1.17E-161 | 0.117 | 7  | 17.8 | Q2 |
| IPI00221234;l | ALDH7A1       | 32.3 | 1.10E-214 | 0.118 | 7  | 14.5 | Q2 |
| IPI00183695   | S100A10       | 57.7 | 5.15E-12  | 0.118 | 16 | 4.0  | Q2 |
| IPI00031131;l | APMAP         | 16.8 | 7.87E-32  | 0.118 | 2  | 6.3  | Q2 |
| IPI00783625;l | SERPINB5      | 63.5 | <1.0E-304 | 0.118 | 56 | 16.0 | Q2 |
| IPI00025285;l | ATP6V1G1      | 41.5 | 1.83E-54  | 0.118 | 6  | 7.3  | Q2 |
| IPI00797738;l | COX6B1        | 23.3 | 3.93E-08  | 0.119 | 10 | 10.9 | Q2 |
| IPI00304171;l | H2AFY         | 45.2 | 2.50E-172 | 0.119 | 8  | 5.8  | Q2 |
| IPI00024403;l | CPNE3         | 25.7 | 2.82E-133 | 0.120 | 11 | 16.3 | Q2 |
| IPI00328987   | BYSL          | 3.9  | 1.38E-04  | 0.120 | 3  | 18.0 | Q2 |
| IPI00020510   | CISD1         | 42.6 | 9.25E-11  | 0.120 | 4  | 7.2  | Q2 |
| IPI00218924;l | CHP           | 47.2 | 4.66E-141 | 0.120 | 4  | 11.5 | Q2 |

|               |          |      |           |       |    |      |    |
|---------------|----------|------|-----------|-------|----|------|----|
| IPI00019551   | PHLDA2   | 16.4 | 3.90E-05  | 0.120 | 3  | 17.0 | Q2 |
| IPI00005996;I | HMGA2    | 41.3 | 7.24E-94  | 0.121 | 8  | 9.8  | Q2 |
| IPI00004358;I | PYGB     | 60.3 | <1.0E-304 | 0.121 | 48 | 16.7 | Q2 |
| IPI00000070;I | LDLR     | 21.5 | 6.24E-160 | 0.121 | 5  | 12.3 | Q2 |
| IPI00020672;I | DPP3     | 23.6 | 5.22E-137 | 0.122 | 6  | 8.6  | Q2 |
| IPI00027175;I | SRI      | 39.9 | 1.53E-42  | 0.122 | 10 | 74.4 | Q2 |
| IPI00019178;I | PSPH     | 15.1 | 3.92E-09  | 0.123 | 2  | 11.7 | Q2 |
| IPI00450768;I | KRT17    | 66   | <1.0E-304 | 0.123 | 55 | 18.4 | Q2 |
| IPI00007047   | S100A8   | 47.3 | 2.58E-14  | 0.124 | 5  | 11.2 | Q2 |
| IPI00384643;I | TP53I3   | 15.4 | 2.13E-08  | 0.124 | 5  | 4.9  | Q2 |
| IPI00872929;I | APOBEC3C | 32.8 | 2.45E-77  | 0.125 | 2  | 0.2  | Q2 |
| IPI00013174;I | RBM14    | 12.3 | 2.87E-25  | 0.126 | 5  | 15.5 | Q2 |
| IPI00794956;I | SCFD1    | 16.5 | 3.89E-91  | 0.126 | 5  | 11.2 | Q2 |
| IPI00304409   | CARHSP1  | 25.9 | 3.92E-48  | 0.127 | 4  | 24.9 | Q2 |
| IPI00299086;I | SDCBP    | 26.8 | 1.43E-126 | 0.127 | 8  | 22.2 | Q2 |
| IPI00646762;I | NUDT5    | 42.7 | 4.45E-103 | 0.127 | 11 | 10.6 | Q2 |
| IPI00175024;I | IL1RN    | 53.5 | 2.01E-170 | 0.127 | 5  | 3.3  | Q2 |
| IPI00031514;I | RFC5     | 32.4 | 7.49E-23  | 0.128 | 3  | 18.0 | Q2 |
| IPI00549389;I | METTL11A | 22.8 | 4.29E-48  | 0.128 | 4  | 3.6  | Q2 |
| IPI00927647;I | POR      | 11.5 | 6.71E-24  | 0.129 | 2  | 11.3 | Q2 |
| IPI00024915;I | PRDX5    | 55.6 | 3.38E-248 | 0.129 | 13 | 10.7 | Q2 |
| IPI00002134;I | PSMD5    | 32.9 | 2.52E-185 | 0.130 | 5  | 9.5  | Q2 |
| IPI00011107   | IDH2     | 23.2 | 2.71E-60  | 0.130 | 5  | 4.3  | Q2 |
| IPI00646556;I | NDUFV2   | 13.5 | 4.54E-45  | 0.131 | 3  | 26.6 | Q2 |
| IPI00005966   | NDUFA12  | 11.6 | 2.44E-03  | 0.132 | 4  | 10.9 | Q2 |
| IPI00021828   | CSTB     | 85.7 | 2.27E-54  | 0.132 | 7  | 14.0 | Q2 |
| IPI00293665;C | KRT6B    | 6.6  | <1.0E-304 | 0.132 | 8  | 5.3  | Q2 |
| IPI00013459;I | NDUFB5   | 14.8 | 1.64E-24  | 0.132 | 3  | 16.3 | Q2 |
| IPI00293276   | MIF      | 23.5 | 2.09E-17  | 0.133 | 15 | 13.7 | Q2 |
| IPI00220194;I | SLC2A1   | 10.8 | 3.23E-37  | 0.133 | 7  | 10.6 | Q2 |
| IPI00218475;I | IFI35    | 26   | 3.84E-38  | 0.133 | 7  | 11.3 | Q2 |
| IPI00024913;I | C21orf33 | 39.9 | 3.30E-27  | 0.133 | 3  | 6.0  | Q2 |
| IPI00179713;I | IGF2BP2  | 28.9 | 8.73E-129 | 0.134 | 10 | 6.1  | Q2 |
| IPI00009342;I | IQGAP1   | 51.5 | <1.0E-304 | 0.134 | 12 | 14.0 | Q2 |
| IPI00032313   | S100A4   | 25.7 | 1.10E-06  | 0.134 | 5  | 1.6  | Q2 |

|               |          |      |           |       |    |      |    |
|---------------|----------|------|-----------|-------|----|------|----|
| IPI00873459;l | 10-Sep   | 13.8 | 6.20E-41  | 0.135 | 3  | 6.3  | Q2 |
| IPI00030059;l | GNG10    | 26.5 | 7.06E-13  | 0.136 | 2  | 9.9  | Q2 |
| IPI00903119;l | SMS      | 18.2 | 3.83E-101 | 0.137 | 5  | 11.2 | Q2 |
| IPI00033030;l | ADRM1    | 15.5 | 3.53E-35  | 0.138 | 3  | 8.4  | Q2 |
| IPI00550181;l | CHMP2B   | 12.7 | 4.25E-15  | 0.138 | 4  | 6.2  | Q2 |
| IPI00000305;l | MED11    | 13.7 | 9.81E-05  | 0.138 | 2  | 5.1  | Q2 |
| IPI00184363;l | GLTP     | 22   | 1.90E-66  | 0.140 | 2  | 11.5 | Q2 |
| IPI00873344;l | TPD52    | 40.7 | 2.39E-111 | 0.140 | 5  | 13.5 | Q2 |
| IPI00152900   | LZIC     | 19   | 6.47E-12  | 0.140 | 2  | 0.4  | Q2 |
| IPI00004839   | CRKL     | 36.6 | 1.78E-153 | 0.140 | 5  | 22.3 | Q2 |
| IPI00465431   | LGALS3   | 33.6 | 2.92E-74  | 0.140 | 21 | 8.9  | Q2 |
| IPI00030363;l | ACAT1    | 29   | 2.62E-182 | 0.141 | 7  | 3.8  | Q2 |
| IPI00023334;l | MRPL4    | 19   | 7.01E-42  | 0.142 | 3  | 20.8 | Q2 |
| IPI00013847;l | UQCRC1   | 17.5 | 1.50E-61  | 0.143 | 2  | 0.6  | Q2 |
| IPI00011937;l | PRDX4    | 26.9 | 3.29E-25  | 0.143 | 7  | 13.1 | Q2 |
| IPI00170935   | LRRC47   | 24.4 | 6.15E-63  | 0.144 | 3  | 18.3 | Q2 |
| IPI00019463;l | EIF2AK2  | 18.1 | 2.12E-56  | 0.145 | 8  | 6.5  | Q2 |
| IPI00008964;l | RAB1B    | 25.4 | 3.50E-262 | 0.145 | 5  | 9.1  | Q2 |
| IPI00290857   | KRT3     | 1.6  | 1.85E-52  | 0.145 | 3  | 5.4  | Q2 |
| IPI00221117;l | ACYP1    | 30.3 | 7.90E-15  | 0.145 | 4  | 9.7  | Q2 |
| IPI00022793;l | HADHB    | 28.5 | 6.97E-86  | 0.146 | 6  | 7.0  | Q2 |
| IPI00217272;l | AACS     | 11.5 | 1.01E-17  | 0.146 | 5  | 1.4  | Q2 |
| IPI00478229;l | RP11     | 7.3  | 8.14E-11  | 0.147 | 2  | 2.7  | Q2 |
| IPI00101106   | COMMD5   | 8    | 4.62E-03  | 0.148 | 3  | 18.8 | Q2 |
| IPI00009305;l | GNPDA1   | 46   | 7.91E-115 | 0.148 | 8  | 30.7 | Q2 |
| IPI00009659;l | RPRD1B   | 19.9 | 1.51E-27  | 0.148 | 6  | 9.0  | Q2 |
| IPI00418248;l | MOB2     | 6.7  | 4.69E-04  | 0.148 | 3  | 16.4 | Q2 |
| IPI00020567;l | ARHGAP1  | 24.2 | 6.64E-37  | 0.149 | 2  | 2.7  | Q2 |
| IPI00013895;l | S100A11  | 56.2 | 2.65E-109 | 0.149 | 26 | 13.5 | Q2 |
| IPI00010320;l | CBX1     | 22.7 | 1.17E-53  | 0.149 | 2  | 1.7  | Q2 |
| IPI00220770;l | DCTN6    | 9.5  | 1.39E-08  | 0.149 | 2  | 3.8  | Q2 |
| IPI00020446;l | CD82     | 9    | 4.97E-13  | 0.150 | 4  | 11.9 | Q2 |
| IPI00215998;l | CD63     | 12.6 | 2.72E-08  | 0.152 | 9  | 12.2 | Q2 |
| IPI00337494;l | SLC25A24 | 26.6 | 8.36E-69  | 0.153 | 8  | 21.0 | Q2 |
| IPI00872754;l | STK24    | 15.1 | 6.21E-140 | 0.153 | 2  | 0.7  | Q2 |

|               |           |      |           |       |    |      |    |
|---------------|-----------|------|-----------|-------|----|------|----|
| IPI00439948;l | PPP1R13L  | 24.5 | 2.02E-110 | 0.154 | 3  | 6.0  | Q2 |
| IPI00022697;l | DRG2      | 14.6 | 1.71E-83  | 0.154 | 5  | 13.3 | Q2 |
| IPI00333143;l | DGKA      | 23.5 | 4.49E-220 | 0.154 | 7  | 9.3  | Q2 |
| IPI00299977;l | PHPT1     | 46.4 | 2.94E-96  | 0.155 | 5  | 17.5 | Q2 |
| IPI00014439;l | QDPR      | 22.5 | 8.24E-132 | 0.155 | 2  | 10.8 | Q2 |
| IPI00010402;l | SH3BGRL3  | 14.6 | 8.98E-34  | 0.155 | 8  | 8.5  | Q2 |
| IPI00016179   | S100A13   | 55.1 | 8.30E-22  | 0.155 | 11 | 10.3 | Q2 |
| IPI00216730;l | HIST2H2AB | 5.4  | 9.19E-68  | 0.155 | 3  | 9.0  | Q2 |
| IPI00329599   | PHLDA3    | 14.2 | 1.38E-04  | 0.155 | 2  | 4.0  | Q2 |
| IPI00333763   | GLRX5     | 19.7 | 7.56E-24  | 0.156 | 2  | 1.3  | Q2 |
| IPI00219840;l | AP2S1     | 16.9 | 9.11E-05  | 0.156 | 8  | 8.8  | Q2 |
| IPI00299149;l | SUMO2     | 29.5 | 5.09E-26  | 0.157 | 7  | 3.8  | Q2 |
| IPI00913889;l | HDHD1A    | 12.7 | 3.64E-09  | 0.157 | 2  | 8.0  | Q2 |
| IPI00299404;l | LAMB3     | 47.3 | <1.0E-304 | 0.159 | 19 | 24.9 | Q2 |
| IPI00022240;l | ISCU      | 10.2 | 1.43E-02  | 0.161 | 2  | 6.6  | Q2 |
| IPI00216675;l | CASP7     | 5.4  | 1.68E-02  | 0.162 | 2  | 4.3  | Q2 |
| IPI00514856;l | UBAP2L    | 21.5 | 1.22E-196 | 0.162 | 3  | 7.0  | Q2 |
| IPI00007935;l | PDLIM5    | 16.3 | 3.19E-30  | 0.162 | 11 | 9.2  | Q2 |
| IPI00306516   | TIMM44    | 16.6 | 1.25E-83  | 0.162 | 4  | 9.5  | Q2 |
| IPI00018600;l | OPA3      | 12.3 | 8.52E-04  | 0.163 | 2  | 24.3 | Q2 |
| IPI00644127;l | IARS      | 39   | <1.0E-304 | 0.165 | 3  | 26.6 | Q2 |
| IPI00000783;l | PSMB8     | 30.1 | 4.01E-63  | 0.165 | 5  | 11.9 | Q2 |
| IPI00015865;l | ADPRHL2   | 8.8  | 3.07E-29  | 0.167 | 3  | 8.6  | Q2 |
| IPI00026268;l | GNB1      | 13.5 | 2.46E-184 | 0.167 | 5  | 9.1  | Q2 |
| IPI00409684;l | NCKAP1    | 17.2 | 4.56E-94  | 0.167 | 3  | 26.7 | Q2 |
| IPI00215920   | ARF6      | 30.3 | 1.62E-75  | 0.168 | 6  | 16.6 | Q2 |
| IPI00002412;l | PPT1      | 7.8  | 5.99E-14  | 0.169 | 2  | 2.0  | Q2 |
| IPI00219526;l | PGM1      | 20.6 | 7.81E-44  | 0.170 | 5  | 13.5 | Q2 |
| IPI00220827   | TMSB10    | 50   | 2.60E-20  | 0.170 | 6  | 6.8  | Q2 |
| IPI00014398;l | FHL1      | 35   | 6.78E-84  | 0.170 | 10 | 3.3  | Q2 |
| IPI00028387;l | DDRKG1    | 9.9  | 9.14E-81  | 0.172 | 2  | 1.5  | Q2 |
| IPI00513761;l | RP3       | 28.2 | 1.06E-108 | 0.172 | 4  | 10.9 | Q2 |
| IPI00021258;l | ARFIP1    | 15.3 | 5.39E-22  | 0.172 | 2  | 4.8  | Q2 |
| IPI00217519;l | RALA      | 26.2 | 2.22E-41  | 0.173 | 8  | 14.1 | Q2 |
| IPI00004363   | STK39     | 4.8  | 1.29E-17  | 0.174 | 2  | 12.3 | Q2 |



|               |          |      |           |       |    |      |    |
|---------------|----------|------|-----------|-------|----|------|----|
| IPI00013744   | ITGA2    | 26.2 | 1.52E-274 | 0.174 | 9  | 37.2 | Q2 |
| IPI00250297   | AASDHPPT | 20.7 | 1.60E-51  | 0.174 | 4  | 8.5  | Q2 |
| IPI00004838;l | CRK      | 40.8 | 9.05E-114 | 0.175 | 8  | 13.8 | Q2 |
| IPI00062120   | S100A16  | 54.4 | 5.24E-30  | 0.175 | 13 | 7.7  | Q2 |
| IPI00011200;l | PHGDH    | 31.1 | 1.51E-152 | 0.175 | 6  | 20.4 | Q2 |
| IPI00008240;l | MARS     | 29.2 | 7.84E-287 | 0.178 | 4  | 12.2 | Q2 |
| IPI00872209;l | PPP3CA   | 18.6 | 1.44E-64  | 0.179 | 7  | 14.1 | Q2 |
| IPI00031820;l | FARSA    | 25.8 | 1.97E-102 | 0.180 | 6  | 5.9  | Q2 |
| IPI00021978;l | PEX11B   | 12.7 | 1.12E-19  | 0.180 | 4  | 19.6 | Q2 |
| IPI00007117;l | SERPIN2  | 49.6 | <1.0E-304 | 0.181 | 11 | 9.5  | Q2 |
| IPI00554761;l | HMG1     | 30   | 1.61E-43  | 0.183 | 5  | 17.1 | Q2 |
| IPI00291608;l | PCNP     | 24.2 | 4.10E-23  | 0.183 | 2  | 13.0 | Q2 |
| IPI00031812;l | YBX1     | 43.8 | 9.88E-243 | 0.185 | 8  | 11.6 | Q2 |
| IPI00397571;l | NSFL1C   | 29   | 4.25E-77  | 0.186 | 2  | 16.6 | Q2 |
| IPI00009946;l | TOMM34   | 31.1 | 1.80E-86  | 0.187 | 7  | 10.3 | Q2 |
| IPI00923582;l | SCRN1    | 17.3 | 9.70E-52  | 0.189 | 7  | 22.0 | Q2 |
| IPI00257059   | TMEM173  | 7.9  | 2.50E-05  | 0.191 | 2  | 13.3 | Q2 |
| IPI00219682;l | STOM     | 49.7 | 1.50E-119 | 0.192 | 11 | 16.4 | Q2 |
| IPI00027341;l | CAPG     | 43.4 | 8.68E-170 | 0.194 | 15 | 9.0  | Q2 |
| IPI00031109   | NDUF2    | 52.7 | 9.41E-69  | 0.195 | 4  | 9.5  | Q2 |
| IPI00553131;l | GALE     | 35.6 | 2.01E-78  | 0.196 | 5  | 9.9  | Q2 |
| IPI00005741;l | MAPK13   | 9    | 1.84E-13  | 0.197 | 2  | 33.1 | Q2 |
| IPI00293074;l | SLC44A2  | 3.1  | 1.52E-02  | 0.197 | 8  | 14.3 | Q2 |
| IPI00018364;l | RAP2B    | 30.6 | 3.14E-70  | 0.198 | 5  | 9.4  | Q2 |
| IPI00001883;l | SNX9     | 11.6 | 3.55E-48  | 0.199 | 2  | 10.7 | Q2 |
| IPI00329615;l | ISCA1    | 6.8  | 8.10E-04  | 0.199 | 2  | 21.3 | Q2 |
| IPI00217466   | HIST1H1D | 16.3 | 9.44E-78  | 0.199 | 4  | 15.9 | Q2 |
| IPI00292657;l | PTGR1    | 18.2 | 6.72E-10  | 0.199 | 5  | 18.6 | Q2 |
| IPI00026781   | FASN     | 52   | <1.0E-304 | 0.200 | 12 | 9.5  | Q2 |
| IPI00216225;l | ITGA6    | 26.5 | 9.43E-219 | 0.200 | 17 | 19.8 | Q2 |
| IPI00304417;l | IDH3B    | 10.7 | 1.81E-30  | 0.201 | 3  | 18.8 | Q2 |
| IPI00783656;l | MRPL38   | 4.7  | 3.94E-04  | 0.201 | 2  | 1.6  | Q2 |
| IPI00030781;l | STAT1    | 37.6 | 1.25E-223 | 0.206 | 13 | 14.0 | Q2 |
| IPI00550364   | PGM2     | 15.2 | 1.63E-58  | 0.207 | 2  | 2.0  | Q2 |
| IPI00027462   | S100A9   | 30.7 | 2.89E-15  | 0.208 | 2  | 9.0  | Q2 |

|               |          |      |           |       |    |      |    |
|---------------|----------|------|-----------|-------|----|------|----|
| IPI00027444;I | SERPINB1 | 48.3 | 4.28E-202 | 0.211 | 19 | 8.9  | Q2 |
| IPI00217049;I | OAS2     | 15.4 | 1.24E-41  | 0.211 | 6  | 8.4  | Q2 |
| IPI00003443;I | IFI16    | 20.3 | 5.27E-58  | 0.212 | 6  | 14.7 | Q2 |
| IPI00024307   | EFNB1    | 14.2 | 6.51E-58  | 0.216 | 8  | 12.9 | Q2 |
| IPI00294834;I | ASPH     | 13.3 | 5.33E-243 | 0.218 | 2  | 7.1  | Q2 |
| IPI00025512;I | HSPB1    | 78   | 2.43E-237 | 0.226 | 36 | 9.3  | Q2 |
| IPI00296353;I | ARHGAP18 | 9.5  | 1.25E-88  | 0.228 | 3  | 11.8 | Q2 |
| IPI00253036;I | CD99     | 5.4  | 1.78E-07  | 0.231 | 4  | 10.8 | Q2 |
| IPI00877174;I | OAS3     | 20   | 4.45E-84  | 0.232 | 3  | 24.3 | Q2 |
| IPI00384280;I | PCYOX1   | 15.8 | 3.66E-68  | 0.233 | 2  | 7.6  | Q2 |
| IPI00217766;I | SCARB2   | 9.6  | 3.57E-07  | 0.233 | 2  | 18.5 | Q2 |
| IPI00027463   | S100A6   | 74.4 | 3.30E-15  | 0.237 | 29 | 13.4 | Q2 |
| IPI00304754;I | FERMT1   | 25.7 | 2.15E-118 | 0.239 | 5  | 28.0 | Q2 |
| IPI00005181;I | PLSCR1   | 7.5  | 6.05E-03  | 0.243 | 2  | 13.1 | Q2 |
| IPI00015351;I | C1orf128 | 16.6 | 2.82E-08  | 0.243 | 5  | 19.6 | Q2 |
| IPI00555647;I | TRA2B    | 10.7 | 3.20E-32  | 0.246 | 4  | 13.4 | Q2 |
| IPI00479262;I | EIF4G1   | 26.7 | <1.0E-304 | 0.247 | 5  | 15.9 | Q2 |
| IPI00009057;I | G3BP2    | 13.1 | 2.65E-87  | 0.248 | 2  | 40.4 | Q2 |
| IPI00658000;I | IGF2BP3  | 18   | 2.44E-120 | 0.250 | 2  | 7.0  | Q2 |
| IPI00550239   | H1FO     | 23.7 | 1.56E-49  | 0.252 | 7  | 43.5 | Q2 |
| IPI00103142   | NUDCD2   | 30.6 | 3.42E-73  | 0.254 | 3  | 27.8 | Q2 |
| IPI00760715;I | CAST     | 48.1 | <1.0E-304 | 0.254 | 3  | 28.4 | Q2 |
| IPI00219221   | LGALS7   | 57.4 | 2.27E-119 | 0.255 | 27 | 9.4  | Q2 |
| IPI00297910;F | TACSTD2  | 25.7 | 3.38E-64  | 0.257 | 5  | 16.8 | Q2 |
| IPI00217963;C | KRT16    | 42.5 | <1.0E-304 | 0.260 | 9  | 11.2 | Q2 |
| IPI00375676;I | FTL      | 19.9 | 2.54E-37  | 0.260 | 2  | 7.6  | Q2 |
| IPI00001649   | DNAJC15  | 16   | 5.62E-06  | 0.265 | 2  | 18.6 | Q2 |
| IPI00329563;I | UBE2L6   | 19.6 | 3.65E-06  | 0.266 | 2  | 4.9  | Q2 |
| IPI00375552;I | ANTXR2   | 3.1  | 1.91E-05  | 0.267 | 2  | 89.2 | Q2 |
| IPI00021831;I | PRKAR1A  | 19.2 | 4.51E-98  | 0.267 | 3  | 20.2 | Q2 |
| IPI00305833   | SMU1     | 7    | 6.23E-13  | 0.269 | 2  | 23.7 | Q2 |
| IPI00215997;I | CD9      | 4.4  | 5.86E-10  | 0.271 | 5  | 10.9 | Q2 |
| IPI00218414;I | CA2      | 28.8 | 3.80E-80  | 0.274 | 5  | 10.8 | Q2 |
| IPI00024107;I | SNCA     | 32.1 | 8.85E-13  | 0.274 | 4  | 9.5  | Q2 |
| IPI00299084   | TMEM33   | 30.4 | 3.69E-52  | 0.274 | 4  | 10.5 | Q2 |

|               |               |      |           |       |    |       |    |
|---------------|---------------|------|-----------|-------|----|-------|----|
| IPI00027443;l | DKFZp686F1612 | 13.6 | 7.83E-46  | 0.274 | 4  | 149.4 | Q2 |
| IPI00480022;l | GOLGA7        | 38.7 | 2.70E-30  | 0.275 | 8  | 59.9  | Q2 |
| IPI00644969;l | KAT           | 26.3 | 4.36E-09  | 0.276 | 4  | 9.1   | Q2 |
| IPI00007926;l | RCL           | 30.5 | 1.04E-36  | 0.284 | 4  | 19.4  | Q2 |
| IPI00034006;l | PTPN23        | 2.6  | 8.71E-11  | 0.289 | 2  | 7.9   | Q2 |
| IPI00012023   | AREG          | 7.9  | 4.11E-08  | 0.297 | 4  | 30.7  | Q2 |
| IPI00219616;l | PRPS1         | 3.1  | 2.86E-77  | 0.305 | 2  | 22.1  | Q2 |
| IPI00845263;l | FN1           | 13.5 | <1.0E-304 | 0.309 | 7  | 21.9  | Q2 |
| IPI00549189;l | THOP1         | 15.7 | 2.73E-60  | 0.310 | 3  | 11.6  | Q2 |
| IPI00219729;l | SLC25A11      | 51.9 | 1.60E-117 | 0.313 | 10 | 9.1   | Q2 |
| IPI00375631   | ISG15         | 41.2 | 1.43E-88  | 0.316 | 8  | 10.3  | Q2 |
| IPI00743772;l | COMMD7        | 6    | 1.11E-06  | 0.318 | 2  | 16.0  | Q2 |
| IPI00747764;l | KPNA6         | 11.8 | 5.38E-32  | 0.324 | 2  | 28.3  | Q2 |
| IPI00005981;l | TAGLN3        | 35.3 | 6.05E-25  | 0.327 | 8  | 21.1  | Q2 |
| IPI00293026;l | EFTUD1        | 19.3 | 2.04E-109 | 0.328 | 2  | 24.2  | Q2 |
| IPI00009507;l | SYPL1         | 8.5  | 8.19E-07  | 0.334 | 5  | 23.3  | Q2 |
| IPI00002441;l | SDC1          | 18.1 | 1.20E-46  | 0.337 | 3  | 7.3   | Q2 |
| IPI00167949;l | MX1           | 47.3 | <1.0E-304 | 0.347 | 23 | 8.6   | Q2 |
| IPI00219718;l | RBP1          | 18.8 | 1.08E-23  | 0.347 | 4  | 13.5  | Q2 |
| IPI00007730;F | C14orf1       | 16.4 | 8.27E-05  | 0.356 | 4  | 5.4   | Q2 |
| IPI00021389   | CCS           | 7.7  | 2.47E-16  | 0.361 | 2  | 9.0   | Q2 |
| IPI00290043;l | ITGA3         | 11   | 3.18E-90  | 0.361 | 7  | 25.3  | Q2 |
| IPI00377045;l | LAMA3         | 14   | <1.0E-304 | 0.362 | 16 | 16.5  | Q2 |
| IPI00290077;l | KRT15         | 65.1 | <1.0E-304 | 0.385 | 52 | 35.1  | Q2 |
| IPI00025178   | BCAS2         | 5.8  | 4.68E-11  | 0.386 | 2  | 16.9  | Q2 |
| IPI00303726;l | IFITM3        | 48.9 | 1.92E-71  | 0.389 | 4  | 31.2  | Q2 |
| IPI00095891;l | GNAS          | 6    | 3.98E-30  | 0.389 | 3  | 15.1  | Q2 |
| IPI00305092;l | WIBG          | 31.9 | 2.00E-104 | 0.439 | 3  | 13.0  | Q2 |
| IPI00022891;l | SLC25A4       | 9.1  | 3.07E-89  | 0.444 | 3  | 0.9   | Q2 |
| IPI00297626   | STXBP3        | 3.2  | 1.06E-03  | 0.448 | 2  | 16.1  | Q2 |
| IPI00872692;l | QPRT          | 12.7 | 5.95E-23  | 0.469 | 5  | 6.5   | Q2 |
| IPI00871938;l | PTGFRN        | 1.9  | 8.13E-04  | 0.499 | 2  | 9.5   | Q2 |
| IPI00856116;l | PALLD         | 8.8  | 5.37E-61  | 0.501 | 3  | 20.8  | Q3 |
| IPI00306749   | SLC4A1AP      | 1.1  | 1.91E-05  | 0.575 | 2  | 43.5  | Q3 |
| IPI00744711;l | PNPT1         | 9.8  | 8.63E-11  | 0.603 | 2  | 46.8  | Q3 |

|               |        |      |           |       |    |       |    |
|---------------|--------|------|-----------|-------|----|-------|----|
| IPI00003843;l | TJP2   | 35.1 | 8.89E-278 | 0.665 | 2  | 86.1  | Q3 |
| IPI00013271;l | DERL1  | 10.8 | 6.21E-11  | 0.679 | 3  | 24.0  | Q3 |
| IPI00216088;l | CRABP2 | 35.5 | 2.38E-26  | 0.748 | 4  | 4.3   | Q3 |
| IPI00385267   | SRPR   | 15.5 | 9.86E-87  | 0.886 | 3  | 81.3  | Q3 |
| IPI00433279;l | SLFN5  | 14.3 | 7.72E-95  | 1.462 | 2  | 135.6 | Q3 |
| IPI00748788;l | MTM1   | 2.5  | 1.80E-02  | 2.306 | 15 | 177.2 | Q3 |

**Supplementary Table 4: Keratinocytes during cell culture.** Cell lysates were prepared from unlabeled (Arg0/Lys0), freshly isolated keratinocytes and labeled (Arg10/Lys8) keratinocytes after 7 cell doublings in culture (D7). Shown are normalized log<sub>2</sub> protein ratios of identified proteins. For identification a minimum of 2 peptides per protein has to be identified (razor). The database used for identification was a decoy database based on IPI v. 3.59 containing in total 160,820 proteins. As a criterium for identification the posterior error probability rate of identified proteins (PEP) is shown. The peptide numbers represent peptides used for quantitation.

| Protein ID    | Gene Symbol | Unique + Razor<br>Sequence Coverage<br>[%] | PEP       | Log2<br>Ratio | Peptide<br>No. | Variability [%] | Quantil |
|---------------|-------------|--------------------------------------------|-----------|---------------|----------------|-----------------|---------|
| IPI00871932;1 | SPTBN1      | 34                                         | <1.0E-304 | -2.675        | 2              | 244.9           | Q1      |
| IPI00217018;1 | SAMD9       | 3                                          | 3.82E-13  | -2.487        | 2              | 17.4            | Q1      |
| IPI00219037   | H2AFX       | 42.7                                       | 2.64E-69  | -2.417        | 3              | 13.7            | Q1      |
| IPI00027462   | S100A9      | 30.7                                       | 2.89E-15  | -2.346        | 6              | 24.2            | Q1      |
| IPI00011692   | IVL         | 40.7                                       | 3.82E-117 | -2.137        | 7              | 4.6             | Q1      |
| IPI00171611;1 | HIST2H3A    | 57.4                                       | 2.41E-31  | -2.135        | 47             | 63.1            | Q1      |
| IPI00329512;1 | SNRPB       | 20.8                                       | 4.38E-91  | -2.059        | 12             | 29.7            | Q1      |
| IPI00761105;1 | TADA2B      | 1.7                                        | 4.87E-02  | -2.058        | 12             | 138.5           | Q1      |
| IPI00007047   | S100A8      | 47.3                                       | 2.58E-14  | -1.993        | 7              | 22.0            | Q1      |
| IPI00217963;0 | KRT16       | 42.5                                       | <1.0E-304 | -1.889        | 35             | 23.6            | Q1      |
| IPI00009650;1 | LCN1        | 12.5                                       | 2.21E-06  | -1.774        | 3              | 58.2            | Q1      |
| IPI00010130;1 | GLUL        | 7                                          | 1.09E-04  | -1.769        | 2              | 186.0           | Q1      |
| IPI00419258;1 | HMGB1       | 51.2                                       | 1.80E-168 | -1.732        | 2              | 4.0             | Q1      |
| IPI00012382;1 | SNRPA       | 15.2                                       | 3.98E-11  | -1.724        | 5              | 58.3            | Q1      |
| IPI00216138;1 | TAGLN       | 22.4                                       | 9.99E-48  | -1.620        | 2              | 33.7            | Q1      |
| IPI00455457   | HIST2H3PS2  | 8.1                                        | 1.64E-05  | -1.509        | 2              | 97.8            | Q1      |
| IPI00216654;1 | NOLC1       | 11.1                                       | 2.64E-28  | -1.487        | 9              | 59.1            | Q1      |
| IPI00216730;1 | HIST2H2AB   | 5.4                                        | 9.19E-68  | -1.454        | 2              | 101.8           | Q1      |
| IPI00018352;1 | UCHL1       | 33.2                                       | 7.07E-32  | -1.421        | 5              | 19.4            | Q1      |
| IPI00021369;1 | CRYAB       | 24.6                                       | 1.09E-21  | -1.410        | 2              | 164.6           | Q1      |
| IPI00022078;1 | NDRG1       | 30.7                                       | 3.11E-189 | -1.410        | 4              | 5.1             | Q1      |
| IPI00217357   | CCAR1       | 11.4                                       | 5.79E-116 | -1.379        | 3              | 79.3            | Q1      |
| IPI00011118;1 | RRM2        | 17.1                                       | 9.94E-103 | -1.358        | 4              | 17.5            | Q1      |
| IPI00007117;1 | SERPINB2    | 49.6                                       | <1.0E-304 | -1.342        | 27             | 12.2            | Q1      |
| IPI00014938;1 | SARNP       | 31.9                                       | 5.09E-76  | -1.335        | 5              | 38.5            | Q1      |

|               |            |      |           |        |     |      |    |
|---------------|------------|------|-----------|--------|-----|------|----|
| IPI00022488   | HPX        | 14.5 | 1.61E-23  | -1.291 | 2   | 11.9 | Q1 |
| IPI00477495   | H2BFS      | 75.4 | 3.13E-73  | -1.269 | 59  | 67.6 | Q1 |
| IPI00027705   | PRIM2      | 5.9  | 4.30E-17  | -1.258 | 2   | 7.0  | Q1 |
| IPI00216457;I | HIST2H2AA3 | 62.3 | 1.91E-91  | -1.226 | 37  | 90.4 | Q1 |
| IPI00026689;I | CDC2       | 58.7 | 4.14E-152 | -1.222 | 15  | 17.7 | Q1 |
| IPI00013933;I | DSP        | 56.1 | <1.0E-304 | -1.221 | 14  | 66.8 | Q1 |
| IPI00450768;I | KRT17      | 66   | <1.0E-304 | -1.168 | 103 | 68.8 | Q1 |
| IPI00020928;I | TFAM       | 22.4 | 2.65E-28  | -1.137 | 3   | 73.4 | Q1 |
| IPI00002214;I | KPNA2      | 28.2 | 3.23E-195 | -1.122 | 13  | 8.8  | Q1 |
| IPI00018350;I | MCM5       | 17.8 | 8.02E-81  | -1.100 | 4   | 11.9 | Q1 |
| IPI00007983;I | PDLIM2     | 3    | 9.43E-06  | -1.088 | 2   | 57.3 | Q1 |
| IPI00017381;I | RFC4       | 15.2 | 5.39E-21  | -1.037 | 2   | 11.2 | Q1 |
| IPI00887771;I | DHFR       | 36.3 | 2.27E-65  | -1.023 | 3   | 10.5 | Q1 |
| IPI00872733;I | POLE4      | 17.9 | 2.04E-14  | -1.021 | 2   | 9.6  | Q1 |
| IPI00893715;I | EPCAM      | 6.7  | 1.41E-05  | -1.006 | 2   | 10.9 | Q1 |
| IPI00335449;I | PPP2R1B    | 5.1  | 2.65E-129 | -0.995 | 3   | 61.9 | Q1 |
| IPI00013214;I | MCM3       | 31.8 | 1.33E-220 | -0.993 | 8   | 14.1 | Q1 |
| IPI00013679;I | DUT        | 34.9 | 7.03E-188 | -0.987 | 8   | 16.5 | Q1 |
| IPI00550239   | H1FO       | 23.7 | 1.56E-49  | -0.981 | 3   | 69.5 | Q1 |
| IPI00033036;I | METAP2     | 5.4  | 4.56E-05  | -0.981 | 3   | 14.6 | Q1 |
| IPI00012369;I | MAD2L1     | 24.9 | 2.46E-11  | -0.972 | 4   | 11.1 | Q1 |
| IPI00332499;I | NASP       | 23.2 | 1.92E-183 | -0.968 | 7   | 10.8 | Q1 |
| IPI00922181;I | MCM2       | 22.6 | 9.14E-137 | -0.962 | 10  | 32.2 | Q1 |
| IPI00071509;I | PKP1       | 21.8 | 9.76E-177 | -0.952 | 4   | 54.7 | Q1 |
| IPI00031517   | MCM6       | 24   | 6.82E-91  | -0.950 | 4   | 11.8 | Q1 |
| IPI00218448;I | H2AFZ      | 41.4 | 1.37E-32  | -0.921 | 11  | 62.9 | Q1 |
| IPI00005648;I | SAFB2      | 6.3  | 1.37E-89  | -0.913 | 2   | 7.0  | Q1 |
| IPI00796919;I | GLB1       | 5    | 7.35E-10  | -0.908 | 2   | 79.6 | Q1 |
| IPI00013871   | RRM1       | 23   | 1.50E-114 | -0.901 | 8   | 28.2 | Q1 |
| IPI00021700   | PCNA       | 64.4 | 6.15E-261 | -0.898 | 9   | 8.5  | Q1 |
| IPI00453473   | HIST1H4A   | 53.4 | 2.75E-80  | -0.898 | 97  | 47.5 | Q1 |
| IPI00902843;I | CDIPT      | 8.9  | 4.15E-06  | -0.879 | 5   | 55.0 | Q1 |
| IPI00299904;I | MCM7       | 20.3 | 1.32E-86  | -0.866 | 6   | 8.6  | Q1 |
| IPI00008998;I | PTPLAD1    | 11.6 | 1.31E-31  | -0.848 | 3   | 16.2 | Q1 |
| IPI00328985;I | THOC6      | 9.4  | 7.17E-12  | -0.833 | 3   | 2.3  | Q1 |

|              |           |      |           |        |    |       |    |
|--------------|-----------|------|-----------|--------|----|-------|----|
| IPI00018349; | MCM4      | 18.5 | 1.59E-100 | -0.828 | 5  | 18.3  | Q1 |
| IPI00019640  | VRK1      | 9.8  | 2.18E-06  | -0.807 | 4  | 17.3  | Q1 |
| IPI00168317; | SPC24     | 19.8 | 4.35E-08  | -0.785 | 4  | 18.1  | Q1 |
| IPI00015953; | DDX21     | 45.1 | <1.0E-304 | -0.785 | 20 | 17.4  | Q1 |
| IPI00552920; | EXOSC8    | 18.8 | 1.34E-55  | -0.779 | 4  | 12.8  | Q1 |
| IPI00031679; | C3orf26   | 8.6  | 5.89E-03  | -0.774 | 2  | 28.1  | Q1 |
| IPI00465410  | C12orf73  | 26.8 | 4.62E-02  | -0.762 | 3  | 39.8  | Q1 |
| IPI00010277; | TNFRSF12A | 23.3 | 2.14E-17  | -0.752 | 5  | 59.9  | Q1 |
| IPI00020827  | MKKS      | 41.3 | 2.06E-27  | -0.751 | 4  | 24.8  | Q1 |
| IPI00002203; | BCCIP     | 21.7 | 1.85E-92  | -0.747 | 4  | 13.1  | Q1 |
| IPI00647837; | ZNF185    | 22.5 | 1.06E-127 | -0.737 | 2  | 14.5  | Q1 |
| IPI00217465; | HIST1H1C  | 40.8 | 5.30E-79  | -0.737 | 27 | 57.5  | Q1 |
| IPI00465044  | RCC2      | 19.2 | 2.49E-21  | -0.735 | 6  | 11.8  | Q1 |
| IPI00736473; | CHTF8     | 17.4 | 4.67E-02  | -0.721 | 2  | 11.7  | Q1 |
| IPI00055954; | WDR43     | 4.4  | 1.48E-05  | -0.710 | 2  | 5.5   | Q1 |
| IPI00031681; | CDK2      | 24.2 | 2.02E-42  | -0.704 | 7  | 15.1  | Q1 |
| IPI00001661; | RCC1      | 21.7 | 2.71E-100 | -0.703 | 8  | 12.6  | Q1 |
| IPI00014198; | EXOSC7    | 15.5 | 1.07E-44  | -0.702 | 3  | 6.5   | Q1 |
| IPI00175024; | IL1RN     | 53.5 | 2.01E-170 | -0.690 | 6  | 13.5  | Q1 |
| IPI00015905; | EXOSC2    | 15   | 8.11E-68  | -0.688 | 3  | 7.9   | Q1 |
| IPI00026215  | FEN1      | 19.2 | 2.00E-13  | -0.686 | 5  | 6.4   | Q1 |
| IPI00217468; | HIST1H1B  | 22.1 | 7.39E-53  | -0.683 | 21 | 55.1  | Q1 |
| IPI00217862  | RRP9      | 8.2  | 1.55E-04  | -0.682 | 4  | 7.7   | Q1 |
| IPI00791262; | ICT1      | 26.3 | 9.68E-23  | -0.679 | 2  | 62.8  | Q1 |
| IPI00166079; | VKORC1L1  | 10.8 | 7.68E-04  | -0.670 | 2  | 20.7  | Q1 |
| IPI00020510  | CISD1     | 42.6 | 9.25E-11  | -0.665 | 4  | 29.4  | Q1 |
| IPI00010141  | POLE3     | 22.4 | 5.88E-45  | -0.665 | 4  | 9.4   | Q1 |
| IPI00221222; | SUB1      | 42.5 | 3.56E-37  | -0.660 | 17 | 41.0  | Q1 |
| IPI00020127  | RPA1      | 15.7 | 6.15E-145 | -0.650 | 2  | 13.6  | Q1 |
| IPI00001146  | LSM6      | 43.8 | 3.74E-13  | -0.645 | 7  | 19.6  | Q1 |
| IPI00218775; | FKBP5     | 19.9 | 2.17E-36  | -0.637 | 8  | 3.7   | Q1 |
| IPI00293665; | KRT6B     | 6.6  | <1.0E-304 | -0.631 | 16 | 108.8 | Q1 |
| IPI00074587; | FUSIP1    | 21.8 | 1.76E-63  | -0.618 | 7  | 15.1  | Q1 |
| IPI00029079; | GMPS      | 28.1 | 3.23E-259 | -0.617 | 9  | 15.2  | Q1 |
| IPI00007175; | NIP7      | 34.4 | 1.05E-44  | -0.616 | 6  | 18.0  | Q1 |

|              |          |      |           |        |    |       |    |
|--------------|----------|------|-----------|--------|----|-------|----|
| IPI00306439; | C18orf55 | 11.3 | 4.65E-06  | -0.613 | 2  | 18.5  | Q1 |
| IPI00007089  | TINP1    | 15.8 | 8.71E-10  | -0.608 | 3  | 3.7   | Q1 |
| IPI00555744; | RPL14    | 37.7 | 2.22E-147 | -0.604 | 6  | 14.4  | Q1 |
| IPI00021840; | RPS6     | 32.5 | 9.34E-108 | -0.591 | 23 | 15.6  | Q1 |
| IPI00032460; | LSM2     | 18.9 | 1.61E-10  | -0.591 | 4  | 24.8  | Q1 |
| IPI00217466  | HIST1H1D | 16.3 | 9.44E-78  | -0.588 | 3  | 91.7  | Q1 |
| IPI00220609; | SEH1L    | 10.7 | 3.03E-16  | -0.583 | 4  | 12.1  | Q1 |
| IPI00300371; | SF3B3    | 24.4 | <1.0E-304 | -0.579 | 9  | 16.8  | Q1 |
| IPI00005792; | PABPN1   | 14.7 | 2.33E-29  | -0.576 | 4  | 18.4  | Q1 |
| IPI00001649  | DNAJC15  | 16   | 5.62E-06  | -0.575 | 3  | 14.3  | Q1 |
| IPI00032853; | NOP10    | 37.5 | 1.04E-03  | -0.573 | 3  | 10.1  | Q1 |
| IPI00413611; | TOP1     | 25.2 | 1.32E-82  | -0.573 | 12 | 22.6  | Q1 |
| IPI00009328; | EIF4A3   | 31.4 | 1.36E-118 | -0.568 | 13 | 8.0   | Q1 |
| IPI00026089; | SF3B1    | 28   | 2.62E-190 | -0.566 | 2  | 6.4   | Q1 |
| IPI00297910; | TACSTD2  | 25.7 | 3.38E-64  | -0.566 | 8  | 40.0  | Q1 |
| IPI00604599  | TMED3    | 7.4  | 4.30E-02  | -0.563 | 3  | 17.1  | Q1 |
| IPI00871695; | DEK      | 16.5 | 1.11E-46  | -0.562 | 7  | 19.6  | Q1 |
| IPI00855856; | API5     | 18.3 | 1.35E-119 | -0.562 | 8  | 54.1  | Q1 |
| IPI00031514; | RFC5     | 32.4 | 7.49E-23  | -0.559 | 9  | 11.5  | Q1 |
| IPI00217223  | PAICS    | 3.3  | 1.12E-177 | -0.555 | 2  | 8.3   | Q1 |
| IPI00023234  | UBA2     | 11.1 | 4.53E-23  | -0.551 | 5  | 18.9  | Q1 |
| IPI00003505; | TRIP13   | 17.4 | 3.76E-68  | -0.551 | 2  | 4.4   | Q1 |
| IPI00024719; | HAT1     | 11.2 | 1.08E-111 | -0.549 | 2  | 0.4   | Q1 |
| IPI00328319; | RBBP4    | 18.8 | 5.61E-39  | -0.549 | 10 | 12.3  | Q1 |
| IPI00305833  | SMU1     | 7    | 6.23E-13  | -0.547 | 6  | 17.0  | Q1 |
| IPI00007088  | ANAPC10  | 13   | 1.68E-06  | -0.544 | 2  | 3.4   | Q1 |
| IPI00033130; | SAE1     | 26   | 6.58E-56  | -0.543 | 7  | 22.1  | Q1 |
| IPI00215768  | GCLC     | 4.2  | 4.24E-06  | -0.542 | 3  | 108.6 | Q1 |
| IPI00217975; | LMNB1    | 25.8 | 6.68E-92  | -0.541 | 7  | 9.1   | Q1 |
| IPI00046828; | CCDC58   | 27.8 | 1.67E-23  | -0.539 | 3  | 3.2   | Q1 |
| IPI00015838  | LYAR     | 6.6  | 9.83E-20  | -0.538 | 2  | 3.3   | Q1 |
| IPI00015077; | EIF1     | 43.4 | 7.47E-71  | -0.536 | 7  | 19.2  | Q1 |
| IPI00005154; | SSRP1    | 16.9 | 1.94E-67  | -0.534 | 5  | 16.2  | Q1 |
| IPI00514173; | PPIE     | 15.6 | 3.00E-43  | -0.533 | 8  | 97.6  | Q1 |
| IPI00029764; | SF3A3    | 17.6 | 5.12E-31  | -0.532 | 8  | 135.7 | Q1 |



|              |           |      |           |        |    |      |    |
|--------------|-----------|------|-----------|--------|----|------|----|
| IPI00023972; | DDX47     | 13.2 | 5.71E-54  | -0.527 | 3  | 10.5 | Q1 |
| IPI00171665  | NUP37     | 6.7  | 1.43E-05  | -0.526 | 2  | 17.3 | Q1 |
| IPI00430812; | CNBP      | 26.6 | 3.58E-48  | -0.524 | 5  | 13.1 | Q1 |
| IPI00025512; | HSPB1     | 78   | 2.43E-237 | -0.519 | 23 | 39.0 | Q1 |
| IPI00029534; | PPAT      | 6.6  | 9.48E-07  | -0.517 | 2  | 4.6  | Q1 |
| IPI00032849; | NOP16     | 28.7 | 2.08E-21  | -0.517 | 5  | 4.6  | Q1 |
| IPI00555647; | TRA2B     | 10.7 | 3.20E-32  | -0.516 | 6  | 19.3 | Q1 |
| IPI00477155; | GTPBP4    | 19.5 | 1.59E-73  | -0.516 | 3  | 16.5 | Q1 |
| IPI00397860; | CYB5A     | 16.4 | 1.25E-12  | -0.515 | 2  | 1.9  | Q1 |
| IPI00152708  | UTP15     | 7.1  | 1.66E-09  | -0.514 | 5  | 8.0  | Q1 |
| IPI00010204; | SFRS3     | 27.4 | 6.91E-47  | -0.510 | 11 | 23.3 | Q1 |
| IPI00409717; | EIF4A2    | 9.3  | 1.27E-216 | -0.508 | 3  | 21.4 | Q1 |
| IPI00014263  | EIF4H     | 53.6 | 5.68E-157 | -0.506 | 8  | 27.6 | Q1 |
| IPI00022462; | TFRC      | 29.9 | 9.08E-174 | -0.503 | 7  | 16.1 | Q1 |
| IPI00332157  | MRPL54    | 7.2  | 4.76E-04  | -0.502 | 2  | 35.5 | Q1 |
| IPI00465361; | RPL13     | 46   | 1.57E-41  | -0.501 | 17 | 32.6 | Q1 |
| IPI00216230  | TMPO      | 14.3 | 5.90E-59  | -0.500 | 2  | 7.1  | Q2 |
| IPI00016801; | GLUD1     | 46.2 | 2.31E-274 | -0.498 | 22 | 12.1 | Q2 |
| IPI00013468; | BUB3      | 24.7 | 3.56E-34  | -0.497 | 10 | 16.9 | Q2 |
| IPI00004968  | PRPF19    | 21.8 | 1.36E-179 | -0.495 | 9  | 9.7  | Q2 |
| IPI00220528  | SNRPF     | 55.8 | 1.78E-39  | -0.495 | 12 | 19.7 | Q2 |
| IPI00411886; | NOC2L     | 8.5  | 2.11E-09  | -0.493 | 2  | 1.8  | Q2 |
| IPI00169325  | WDR36     | 11.5 | 3.93E-76  | -0.492 | 2  | 11.1 | Q2 |
| IPI00102173; | UBE2E2    | 17.9 | 2.64E-40  | -0.491 | 3  | 3.3  | Q2 |
| IPI00024781; | SERF2     | 28.8 | 7.48E-03  | -0.487 | 2  | 8.5  | Q2 |
| IPI00219445; | PSME3     | 43.8 | 9.47E-133 | -0.484 | 8  | 10.9 | Q2 |
| IPI00182180  | OTUD6B    | 6.8  | 3.43E-38  | -0.478 | 2  | 35.8 | Q2 |
| IPI00029048; | TTLL12    | 17.7 | 7.45E-59  | -0.477 | 4  | 7.9  | Q2 |
| IPI00027831; | GRWD1     | 15.7 | 4.68E-89  | -0.474 | 6  | 15.0 | Q2 |
| IPI00291510; | IMPDH2    | 35.2 | 1.77E-257 | -0.472 | 23 | 12.6 | Q2 |
| IPI00020017; | APM2      | 27.6 | 1.07E-20  | -0.471 | 3  | 18.4 | Q2 |
| IPI00013002; | UBE2C     | 31.8 | 3.04E-49  | -0.470 | 6  | 13.5 | Q2 |
| IPI00152695; | WDR82     | 20.4 | 2.13E-143 | -0.469 | 5  | 31.5 | Q2 |
| IPI00026358; | GABARAPL2 | 28.2 | 4.08E-11  | -0.467 | 5  | 31.3 | Q2 |
| IPI00260715; | FUS       | 13.3 | 2.24E-62  | -0.464 | 14 | 39.8 | Q2 |

|              |         |      |           |        |    |       |    |
|--------------|---------|------|-----------|--------|----|-------|----|
| IPI00297579; | CBX3    | 39.3 | 1.33E-156 | -0.464 | 10 | 11.6  | Q2 |
| IPI00003311  | POLR2L  | 38.8 | 8.04E-06  | -0.460 | 4  | 15.4  | Q2 |
| IPI00301323; | DDX18   | 10.7 | 2.02E-20  | -0.457 | 4  | 21.6  | Q2 |
| IPI00030275; | TRAP1   | 25.3 | 5.49E-195 | -0.456 | 10 | 7.1   | Q2 |
| IPI00306369  | NSUN2   | 30.9 | 7.18E-209 | -0.456 | 8  | 19.5  | Q2 |
| IPI00396435; | DHX15   | 29.9 | 2.69E-114 | -0.455 | 17 | 31.1  | Q2 |
| IPI00289601; | HDAC2   | 12.4 | 2.69E-86  | -0.454 | 5  | 9.4   | Q2 |
| IPI00333215; | TCEA1   | 28.6 | 1.61E-36  | -0.453 | 10 | 27.6  | Q2 |
| IPI00017617; | DDX5    | 35.3 | 8.28E-157 | -0.453 | 32 | 34.3  | Q2 |
| IPI00010158; | CHRAC1  | 19.8 | 8.71E-07  | -0.453 | 3  | 13.0  | Q2 |
| IPI00334713; | HNRNPAB | 38.6 | 1.36E-124 | -0.451 | 20 | 9.2   | Q2 |
| IPI00003519; | EFTUD2  | 27.5 | <1.0E-304 | -0.449 | 10 | 12.2  | Q2 |
| IPI00219005  | FKBP4   | 66.2 | <1.0E-304 | -0.443 | 29 | 12.9  | Q2 |
| IPI00642378; | LASS2   | 6    | 1.69E-05  | -0.441 | 2  | 2.1   | Q2 |
| IPI00004459  | DIMT1L  | 23   | 4.00E-23  | -0.438 | 5  | 10.7  | Q2 |
| IPI00059292; | MAGOHB  | 35.8 | 3.36E-26  | -0.437 | 4  | 14.3  | Q2 |
| IPI00007163  | LSM7    | 15.5 | 1.20E-02  | -0.435 | 3  | 1.5   | Q2 |
| IPI00844578; | DHX9    | 40.8 | <1.0E-304 | -0.434 | 19 | 19.2  | Q2 |
| IPI00030131; | TMPO    | 12.3 | 3.14E-129 | -0.434 | 3  | 55.4  | Q2 |
| IPI00003768; | PES1    | 10.4 | 3.54E-24  | -0.433 | 5  | 22.2  | Q2 |
| IPI00550308; | RBM12   | 8.9  | 2.06E-49  | -0.431 | 3  | 29.6  | Q2 |
| IPI00218144; | COX17   | 57.1 | 2.19E-35  | -0.431 | 5  | 113.6 | Q2 |
| IPI00290077; | KRT15   | 65.1 | <1.0E-304 | -0.427 | 93 | 52.4  | Q2 |
| IPI00041325; | NHP2    | 37.9 | 1.32E-92  | -0.422 | 4  | 7.8   | Q2 |
| IPI00647217; | SKIV2L2 | 22.1 | 4.53E-172 | -0.422 | 8  | 23.1  | Q2 |
| IPI00154975; | DNAJC9  | 37.3 | 3.02E-52  | -0.422 | 10 | 16.2  | Q2 |
| IPI00873238; | POLR2J  | 11.6 | 3.34E-06  | -0.422 | 2  | 3.2   | Q2 |
| IPI00013706; | MRPL20  | 21.5 | 3.30E-17  | -0.422 | 3  | 15.2  | Q2 |
| IPI00219871; | LSM8    | 37.5 | 5.00E-17  | -0.420 | 4  | 4.4   | Q2 |
| IPI00646917; | NUDT21  | 34.4 | 6.91E-156 | -0.419 | 7  | 2.9   | Q2 |
| IPI00220194; | SLC2A1  | 10.8 | 3.23E-37  | -0.417 | 14 | 38.3  | Q2 |
| IPI00215790; | RPL38   | 44.3 | 2.72E-20  | -0.416 | 13 | 25.2  | Q2 |
| IPI00009943; | TPT1    | 52.7 | 9.23E-125 | -0.414 | 14 | 19.6  | Q2 |
| IPI00644386; | FUBP1   | 25.6 | 3.42E-146 | -0.412 | 12 | 22.6  | Q2 |
| IPI00022810; | CTSC    | 26.6 | 2.11E-272 | -0.410 | 8  | 6.2   | Q2 |

|              |          |      |           |        |    |      |    |
|--------------|----------|------|-----------|--------|----|------|----|
| IPI00167941; | MDN1     | 8.6  | 6.65E-124 | -0.409 | 2  | 13.1 | Q2 |
| IPI00019472; | SLC1A5   | 12   | 9.91E-32  | -0.408 | 6  | 15.0 | Q2 |
| IPI00218993; | HSPH1    | 48.3 | <1.0E-304 | -0.408 | 20 | 11.2 | Q2 |
| IPI00414410; | MRPL22   | 25.2 | 1.93E-33  | -0.406 | 5  | 11.0 | Q2 |
| IPI00029015; | KDSR     | 7.5  | 6.69E-32  | -0.405 | 2  | 1.2  | Q2 |
| IPI00009276  | PROCR    | 13.1 | 3.90E-14  | -0.405 | 5  | 21.7 | Q2 |
| IPI00220834; | XRCC5    | 39.6 | 9.30E-246 | -0.405 | 30 | 13.4 | Q2 |
| IPI00644712; | XRCC6    | 48.3 | <1.0E-304 | -0.405 | 32 | 14.1 | Q2 |
| IPI00012074; | HNRNPR   | 24.8 | 4.14E-199 | -0.403 | 11 | 13.1 | Q2 |
| IPI00007001; | MRPL11   | 46.9 | 2.06E-43  | -0.403 | 4  | 16.8 | Q2 |
| IPI00604620; | NCL      | 37.2 | <1.0E-304 | -0.401 | 34 | 29.3 | Q2 |
| IPI00641829; | BAT1     | 39.3 | 2.24E-187 | -0.399 | 26 | 15.4 | Q2 |
| IPI00026496  | NPM3     | 47.2 | 9.39E-170 | -0.397 | 2  | 9.3  | Q2 |
| IPI00003309; | POLR2H   | 38.7 | 2.63E-53  | -0.397 | 6  | 3.0  | Q2 |
| IPI00290397  | PPP1R14C | 14.5 | 1.46E-11  | -0.396 | 2  | 49.9 | Q2 |
| IPI00177716; | HMGA1    | 14.6 | 7.33E-05  | -0.395 | 2  | 22.5 | Q2 |
| IPI00006167; | PPM1G    | 6.4  | 1.73E-02  | -0.394 | 2  | 0.1  | Q2 |
| IPI00290461; | EIF3J    | 28.3 | 8.58E-43  | -0.394 | 3  | 5.3  | Q2 |
| IPI00004353; | GTF2A2   | 13.8 | 1.37E-04  | -0.392 | 2  | 12.0 | Q2 |
| IPI00789041; | PNN      | 18.1 | 5.13E-83  | -0.391 | 2  | 8.0  | Q2 |
| IPI00023728  | GGH      | 18.2 | 4.05E-40  | -0.390 | 4  | 43.8 | Q2 |
| IPI00084571; | MRPL39   | 18.7 | 6.29E-13  | -0.388 | 7  | 15.0 | Q2 |
| IPI00019733; | RAE1     | 16.8 | 8.48E-19  | -0.388 | 5  | 36.1 | Q2 |
| IPI00004406; | UPP1     | 41.3 | 2.96E-112 | -0.388 | 12 | 8.2  | Q2 |
| IPI00073096; | TRIM29   | 26.9 | 3.78E-62  | -0.387 | 13 | 27.2 | Q2 |
| IPI00014232; | ARL6IP1  | 6.9  | 4.40E-02  | -0.386 | 4  | 10.1 | Q2 |
| IPI00001757; | RBM8A    | 31.6 | 4.46E-57  | -0.386 | 6  | 9.9  | Q2 |
| IPI00470674; | CYB5R1   | 42   | 2.35E-96  | -0.385 | 14 | 11.5 | Q2 |
| IPI00006379; | NOP58    | 27.2 | 3.61E-209 | -0.385 | 7  | 21.7 | Q2 |
| IPI00784154; | HSPD1    | 61.6 | <1.0E-304 | -0.385 | 81 | 18.4 | Q2 |
| IPI00304082; | ISOC1    | 29.2 | 1.82E-111 | -0.383 | 7  | 13.3 | Q2 |
| IPI00069750; | PUF60    | 14.3 | 2.42E-21  | -0.383 | 4  | 29.7 | Q2 |
| IPI00021266; | RPL23A   | 46.8 | 6.22E-59  | -0.382 | 31 | 32.6 | Q2 |
| IPI00554711; | JUP      | 29   | 1.17E-256 | -0.381 | 18 | 72.3 | Q2 |
| IPI00479786; | KHSRP    | 32.5 | 6.42E-141 | -0.380 | 11 | 8.0  | Q2 |

|              |         |      |           |        |    |      |    |
|--------------|---------|------|-----------|--------|----|------|----|
| IPI00013877; | HNRNPH3 | 30.9 | 1.80E-120 | -0.377 | 24 | 28.7 | Q2 |
| IPI00027834; | HNRNPL  | 42.8 | 1.64E-254 | -0.375 | 23 | 25.3 | Q2 |
| IPI00003377; | SFRS7   | 31.9 | 9.61E-56  | -0.373 | 9  | 5.1  | Q2 |
| IPI00011913  | HNRNPA0 | 30.8 | 3.20E-164 | -0.373 | 5  | 7.6  | Q2 |
| IPI00010779; | TPM4    | 46.4 | 1.51E-235 | -0.369 | 12 | 32.2 | Q2 |
| IPI00010157; | MAT2A   | 32.9 | 7.63E-205 | -0.369 | 12 | 13.3 | Q2 |
| IPI00011200; | PHGDH   | 31.1 | 1.51E-152 | -0.367 | 11 | 12.2 | Q2 |
| IPI00299000; | PA2G4   | 58.9 | 8.07E-269 | -0.367 | 29 | 18.1 | Q2 |
| IPI00465432; | NOMO2   | 19.3 | 1.84E-173 | -0.364 | 5  | 25.5 | Q2 |
| IPI00411937; | NOP56   | 32.7 | <1.0E-304 | -0.362 | 16 | 8.5  | Q2 |
| IPI00028005; | NUP107  | 5.9  | 2.94E-06  | -0.361 | 2  | 7.5  | Q2 |
| IPI00477313; | HNRNPC  | 45.8 | 8.19E-140 | -0.361 | 52 | 44.2 | Q2 |
| IPI00032533  | WDR18   | 11.3 | 1.61E-19  | -0.361 | 6  | 19.7 | Q2 |
| IPI00031836; | DRG1    | 28.6 | 1.03E-85  | -0.360 | 8  | 9.5  | Q2 |
| IPI00007346; | PPIH    | 34.5 | 4.34E-31  | -0.359 | 6  | 20.3 | Q2 |
| IPI00375144; | SRRT    | 11.5 | 2.11E-23  | -0.357 | 4  | 9.2  | Q2 |
| IPI00031812; | YBX1    | 43.8 | 9.88E-243 | -0.357 | 13 | 15.2 | Q2 |
| IPI00220362; | HSPE1   | 70.6 | 1.57E-71  | -0.357 | 20 | 11.9 | Q2 |
| IPI00889541; | DDX17   | 21.1 | 2.68E-163 | -0.357 | 10 | 22.7 | Q2 |
| IPI00009659; | RPRD1B  | 19.9 | 1.51E-27  | -0.356 | 4  | 50.5 | Q2 |
| IPI00011698; | SAP18   | 25.6 | 4.41E-05  | -0.356 | 7  | 9.1  | Q2 |
| IPI00031629; | PDCL3   | 34.7 | 1.74E-92  | -0.354 | 5  | 24.7 | Q2 |
| IPI00449049; | PARP1   | 23.4 | 2.46E-156 | -0.354 | 8  | 26.8 | Q2 |
| IPI00019997; | LIN7C   | 31   | 1.49E-20  | -0.354 | 6  | 21.0 | Q2 |
| IPI00010404  | SF3B5   | 37.2 | 2.26E-35  | -0.353 | 5  | 3.9  | Q2 |
| IPI00220493; | LSM5    | 20.9 | 3.87E-48  | -0.352 | 2  | 5.4  | Q2 |
| IPI00008986; | SLC7A5  | 12.6 | 6.16E-123 | -0.351 | 5  | 5.8  | Q2 |
| IPI00297982; | EIF2S3  | 42.2 | 3.18E-168 | -0.348 | 16 | 31.7 | Q2 |
| IPI00654555; | NOP2    | 23   | 5.19E-209 | -0.346 | 6  | 7.9  | Q2 |
| IPI00107745; | CROP    | 11.6 | 3.16E-66  | -0.344 | 3  | 11.9 | Q2 |
| IPI00465256; | AK3     | 21.1 | 3.38E-74  | -0.344 | 2  | 0.8  | Q2 |
| IPI00022403; | MRPL13  | 38.8 | 1.55E-12  | -0.342 | 2  | 9.5  | Q2 |
| IPI00068506; | ABCF2   | 14   | 3.32E-40  | -0.342 | 5  | 12.4 | Q2 |
| IPI00015195; | CSTF3   | 11   | 3.04E-64  | -0.340 | 3  | 10.0 | Q2 |
| IPI00554481; | SLC3A2  | 39.5 | <1.0E-304 | -0.340 | 23 | 23.0 | Q2 |

|              |               |      |           |        |    |      |    |
|--------------|---------------|------|-----------|--------|----|------|----|
| IPI00154473; | GFM1          | 12.1 | 1.35E-63  | -0.339 | 4  | 10.7 | Q2 |
| IPI00552073; | DHX16         | 8.8  | 6.05E-27  | -0.338 | 2  | 42.6 | Q2 |
| IPI00604624; | NIF3L1        | 16.4 | 1.38E-35  | -0.337 | 4  | 33.3 | Q2 |
| IPI00795627; | MRPL3         | 10.7 | 1.77E-08  | -0.336 | 2  | 7.4  | Q2 |
| IPI00032799; | RRP7A         | 12.9 | 4.63E-22  | -0.336 | 3  | 40.0 | Q2 |
| IPI00218918; | ANXA1         | 78.6 | <1.0E-304 | -0.336 | 90 | 34.9 | Q2 |
| IPI00007423; | ANP32B        | 34.7 | 1.35E-147 | -0.334 | 11 | 9.0  | Q2 |
| IPI00183626; | PTBP1         | 36.3 | <1.0E-304 | -0.334 | 28 | 33.7 | Q2 |
| IPI00023529; | CDK6          | 22.1 | 4.11E-50  | -0.332 | 5  | 6.0  | Q2 |
| IPI00026516; | OXCT1         | 16.5 | 3.60E-39  | -0.332 | 5  | 14.3 | Q2 |
| IPI00334190; | STOML2        | 38.8 | 7.51E-150 | -0.332 | 14 | 12.2 | Q2 |
| IPI00021267; | EPHA2         | 12.9 | 5.18E-138 | -0.331 | 7  | 18.8 | Q2 |
| IPI00005670; | CDC123        | 8    | 1.26E-07  | -0.331 | 2  | 8.1  | Q2 |
| IPI00916503; | BZW1          | 33.9 | 1.19E-54  | -0.330 | 19 | 13.9 | Q2 |
| IPI00642816; | SRP9          | 61.6 | 3.83E-17  | -0.329 | 9  | 20.7 | Q2 |
| IPI00642584; | KIAA0090      | 12.4 | 1.98E-89  | -0.327 | 3  | 7.6  | Q2 |
| IPI00022744; | CSE1L         | 39.2 | <1.0E-304 | -0.327 | 31 | 47.0 | Q2 |
| IPI00030820; | MRPL47        | 21.6 | 1.15E-24  | -0.326 | 3  | 7.1  | Q2 |
| IPI00013862; | DTYMK         | 63.2 | 1.96E-59  | -0.326 | 9  | 16.4 | Q2 |
| IPI00644079; | HNRNPU        | 36.1 | <1.0E-304 | -0.324 | 23 | 12.1 | Q2 |
| IPI00165393; | ANP32E        | 20.5 | 2.04E-114 | -0.323 | 3  | 9.4  | Q2 |
| IPI00294955  | LSM4          | 31.7 | 5.01E-13  | -0.323 | 11 | 12.1 | Q2 |
| IPI00642904; | PABPC4        | 10.6 | 2.84E-224 | -0.323 | 7  | 5.2  | Q2 |
| IPI00815732  | DKFZp781N1372 | 45.1 | 3.53E-150 | -0.322 | 16 | 11.4 | Q2 |
| IPI00306380; | GNL3          | 7.3  | 5.72E-08  | -0.322 | 2  | 26.3 | Q2 |
| IPI00022648; | EIF5          | 28.3 | 3.07E-103 | -0.321 | 11 | 10.6 | Q2 |
| IPI00550689; | C22orf28      | 23.2 | 5.57E-31  | -0.319 | 14 | 26.6 | Q2 |
| IPI00100460  | DARS2         | 4.2  | 5.55E-05  | -0.319 | 2  | 4.4  | Q2 |
| IPI00925251; | SNRPG         | 22.1 | 1.92E-13  | -0.319 | 8  | 16.8 | Q2 |
| IPI00513971; | RPS27         | 40.5 | 1.61E-29  | -0.319 | 5  | 21.5 | Q2 |
| IPI00009922  | SLIRP         | 49.5 | 1.28E-27  | -0.317 | 9  | 13.5 | Q2 |
| IPI00465054; | THUMPD1       | 6.2  | 1.53E-12  | -0.317 | 2  | 26.0 | Q2 |
| IPI00146447; | VMA21         | 21.8 | 1.05E-03  | -0.317 | 2  | 27.1 | Q2 |
| IPI00549248; | NPM1          | 55.1 | 1.63E-303 | -0.317 | 46 | 44.5 | Q2 |
| IPI00007188  | SLC25A5       | 50.7 | 1.07E-172 | -0.316 | 32 | 13.2 | Q2 |

|              |          |      |           |        |    |      |    |
|--------------|----------|------|-----------|--------|----|------|----|
| IPI00029056; | SEPHS1   | 11.7 | 6.86E-20  | -0.315 | 2  | 2.0  | Q2 |
| IPI00000684; | UAP1     | 24.5 | 2.57E-104 | -0.314 | 13 | 8.4  | Q2 |
| IPI00030770; | PSMG1    | 26.4 | 7.33E-32  | -0.313 | 3  | 8.3  | Q2 |
| IPI00182757; | KIAA1967 | 19   | 5.92E-96  | -0.311 | 6  | 35.2 | Q2 |
| IPI00025039; | FBL      | 38.9 | 1.84E-109 | -0.310 | 10 | 6.1  | Q2 |
| IPI00017451; | SF3A1    | 21.4 | 1.70E-101 | -0.310 | 9  | 13.1 | Q2 |
| IPI00008167; | ATP1B3   | 30.8 | 1.01E-87  | -0.304 | 8  | 30.5 | Q2 |
| IPI00172580; | NUP54    | 6.1  | 8.66E-32  | -0.302 | 3  | 9.7  | Q2 |
| IPI00096066; | SUCLG2   | 15.7 | 9.64E-74  | -0.299 | 4  | 23.5 | Q2 |
| IPI00827535; | PTMA     | 35.1 | 1.47E-154 | -0.298 | 12 | 11.6 | Q2 |
| IPI00028888; | HNRNPD   | 23.7 | 9.63E-134 | -0.297 | 11 | 12.3 | Q2 |
| IPI00012535; | DNAJA1   | 25.9 | 2.37E-49  | -0.296 | 4  | 10.9 | Q2 |
| IPI00031661  | NOC4L    | 8.9  | 7.25E-11  | -0.296 | 2  | 2.3  | Q2 |
| IPI00018364; | RAP2B    | 30.6 | 3.14E-70  | -0.294 | 2  | 2.7  | Q2 |
| IPI00872610; | CHCHD2   | 26.3 | 2.94E-26  | -0.293 | 2  | 8.2  | Q2 |
| IPI00303722; | FAM136A  | 23.2 | 3.46E-09  | -0.291 | 3  | 3.3  | Q2 |
| IPI00218493; | HPRT1    | 49.5 | 1.58E-129 | -0.291 | 6  | 4.8  | Q2 |
| IPI00163505; | RBM39    | 13.4 | 1.08E-70  | -0.290 | 5  | 12.0 | Q2 |
| IPI00215965; | HNRNPA1  | 54.3 | <1.0E-304 | -0.289 | 57 | 53.1 | Q2 |
| IPI00072377; | SET      | 32.8 | 1.25E-114 | -0.288 | 18 | 32.9 | Q2 |
| IPI00031526  | C19orf43 | 19.9 | 2.18E-09  | -0.286 | 2  | 6.2  | Q2 |
| IPI00012345; | SFRS6    | 11   | 2.14E-08  | -0.286 | 15 | 11.0 | Q2 |
| IPI00218922; | SEC63    | 9.7  | 1.46E-23  | -0.285 | 4  | 23.0 | Q2 |
| IPI00221035; | BTF3     | 45.6 | 1.29E-96  | -0.285 | 16 | 22.0 | Q2 |
| IPI00333068; | ARPC1A   | 18.9 | 3.50E-30  | -0.285 | 8  | 17.0 | Q2 |
| IPI00329107; | NR2C2AP  | 23.1 | 2.48E-15  | -0.284 | 2  | 4.9  | Q2 |
| IPI00026663; | ALDH1A3  | 50.8 | <1.0E-304 | -0.284 | 40 | 25.4 | Q2 |
| IPI00873935; | DKC1     | 13.6 | 3.66E-37  | -0.282 | 4  | 11.5 | Q2 |
| IPI00304692; | RBMX     | 33.5 | 2.16E-103 | -0.281 | 29 | 17.8 | Q2 |
| IPI00292228; | GSK3A    | 5.4  | 9.10E-05  | -0.281 | 2  | 8.0  | Q2 |
| IPI00014253  | RRS1     | 15.3 | 9.28E-24  | -0.281 | 4  | 34.1 | Q2 |
| IPI00291093  | POLR2E   | 40.5 | 2.77E-112 | -0.281 | 9  | 27.0 | Q2 |
| IPI00009680  | MRPL44   | 17.5 | 5.39E-48  | -0.280 | 6  | 16.8 | Q2 |
| IPI00479191; | HNRNPH1  | 31.6 | 3.03E-230 | -0.279 | 38 | 33.1 | Q2 |
| IPI00000875; | EEF1G    | 44.4 | 2.22E-232 | -0.278 | 42 | 14.0 | Q2 |

|              |          |      |           |        |     |      |    |
|--------------|----------|------|-----------|--------|-----|------|----|
| IPI00328987  | BYSL     | 3.9  | 1.38E-04  | -0.277 | 2   | 7.5  | Q2 |
| IPI00873110; | LYRM7    | 31.7 | 1.12E-10  | -0.275 | 4   | 18.4 | Q2 |
| IPI00644708; | TIAL1    | 18.4 | 1.29E-41  | -0.274 | 6   | 8.5  | Q2 |
| IPI00029631  | ERH      | 34.6 | 1.30E-23  | -0.274 | 10  | 29.9 | Q2 |
| IPI00009032; | SSB      | 40.9 | 1.25E-110 | -0.274 | 18  | 11.7 | Q2 |
| IPI00903286; | SNRPD1   | 30.2 | 9.34E-37  | -0.273 | 5   | 12.6 | Q2 |
| IPI00013195; | MRPL49   | 38.6 | 5.24E-57  | -0.273 | 3   | 11.9 | Q2 |
| IPI00103047  | CHAC2    | 10.3 | 3.05E-03  | -0.272 | 2   | 23.2 | Q2 |
| IPI00215911; | APEX1    | 44.7 | 5.49E-178 | -0.271 | 20  | 9.2  | Q2 |
| IPI00026167; | NHP2L1   | 53.9 | 8.30E-60  | -0.270 | 13  | 14.4 | Q2 |
| IPI00418497; | TIMM50   | 15.4 | 3.21E-83  | -0.270 | 5   | 13.0 | Q2 |
| IPI00012772; | RPL8     | 28.4 | 3.51E-43  | -0.270 | 11  | 57.1 | Q2 |
| IPI00014053; | TOMM40   | 16.1 | 3.19E-30  | -0.270 | 7   | 8.9  | Q2 |
| IPI00297779; | CCT2     | 67.5 | <1.0E-304 | -0.269 | 46  | 27.4 | Q2 |
| IPI00003627; | ACTL6A   | 11.9 | 1.13E-30  | -0.269 | 5   | 12.2 | Q2 |
| IPI00006378; | CCDC72   | 14.1 | 3.30E-03  | -0.269 | 2   | 28.2 | Q2 |
| IPI00026942; | ERLIN2   | 21.5 | 1.85E-82  | -0.269 | 4   | 7.9  | Q2 |
| IPI00007750; | TUBA4A   | 15   | <1.0E-304 | -0.268 | 16  | 43.4 | Q2 |
| IPI00003923; | UMPS     | 26.7 | 5.77E-112 | -0.268 | 9   | 11.9 | Q2 |
| IPI00396485; | EEF1A1   | 62.8 | <1.0E-304 | -0.268 | 122 | 28.6 | Q2 |
| IPI00007797; | FABP5    | 60.7 | 2.76E-88  | -0.267 | 23  | 14.9 | Q2 |
| IPI00295081; | TUBG1    | 6.2  | 1.07E-03  | -0.265 | 3   | 9.5  | Q2 |
| IPI00003881  | HNRNPF   | 27.7 | 1.46E-196 | -0.265 | 10  | 29.4 | Q2 |
| IPI00797126; | NACA     | 7.8  | 1.45E-137 | -0.263 | 10  | 9.8  | Q2 |
| IPI00791086; | EIF3D    | 18.8 | 2.25E-177 | -0.263 | 7   | 20.4 | Q2 |
| IPI00027993  | RAB25    | 19.2 | 5.10E-23  | -0.263 | 4   | 15.3 | Q2 |
| IPI00018627; | NAT13    | 66.9 | 2.88E-75  | -0.263 | 9   | 7.9  | Q2 |
| IPI00009010; | AD-001   | 38.4 | 2.45E-65  | -0.263 | 10  | 11.6 | Q2 |
| IPI00005198; | ILF2     | 37.2 | 1.56E-207 | -0.262 | 15  | 24.6 | Q2 |
| IPI00032561; | CAB39    | 41.6 | 7.89E-78  | -0.262 | 20  | 12.5 | Q2 |
| IPI00784090; | CCT8     | 65.1 | <1.0E-304 | -0.262 | 38  | 12.5 | Q2 |
| IPI00025849; | ANP32A   | 20.9 | 6.23E-111 | -0.261 | 3   | 7.8  | Q2 |
| IPI00002520; | SHMT2    | 32.7 | 5.43E-200 | -0.261 | 15  | 10.2 | Q2 |
| IPI00017963; | SNRPD2   | 67.8 | 3.14E-93  | -0.260 | 20  | 10.5 | Q2 |
| IPI00013070; | HNRNPUL1 | 14.6 | 7.90E-91  | -0.260 | 2   | 26.5 | Q2 |

|              |          |      |           |        |    |      |    |
|--------------|----------|------|-----------|--------|----|------|----|
| IPI00438229; | TRIM28   | 37   | <1.0E-304 | -0.259 | 16 | 11.4 | Q2 |
| IPI00329629; | DNAJC7   | 10.3 | 2.65E-15  | -0.259 | 4  | 20.2 | Q2 |
| IPI00017895; | GPD2     | 26   | 4.40E-110 | -0.258 | 9  | 9.0  | Q2 |
| IPI00177428; | CHCHD4   | 5.8  | 2.44E-02  | -0.258 | 2  | 20.3 | Q2 |
| IPI00001541  | TIMM9    | 77.5 | 6.07E-28  | -0.258 | 8  | 13.0 | Q2 |
| IPI00642374; | UCHL5    | 17.1 | 2.22E-21  | -0.258 | 5  | 11.3 | Q2 |
| IPI00022305; | BZW2     | 15.5 | 4.13E-80  | -0.257 | 5  | 13.2 | Q2 |
| IPI00215687; | GLS      | 26.4 | 4.10E-81  | -0.257 | 12 | 10.8 | Q2 |
| IPI00514856; | UBAP2L   | 21.5 | 1.22E-196 | -0.257 | 4  | 63.1 | Q2 |
| IPI00006606  | MRPS26   | 28.3 | 2.59E-21  | -0.256 | 6  | 5.8  | Q2 |
| IPI00412344; | SRPK1    | 7.3  | 6.79E-25  | -0.255 | 2  | 24.9 | Q2 |
| IPI00010740; | SFPQ     | 45.3 | <1.0E-304 | -0.254 | 21 | 17.3 | Q2 |
| IPI00008524; | PABPC1   | 37.3 | <1.0E-304 | -0.253 | 39 | 27.8 | Q2 |
| IPI00873222; | CCT4     | 55.8 | <1.0E-304 | -0.252 | 43 | 27.5 | Q2 |
| IPI00550364  | PGM2     | 15.2 | 1.63E-58  | -0.251 | 7  | 13.7 | Q2 |
| IPI00009368  | SFXN1    | 50   | 1.33E-106 | -0.251 | 11 | 23.8 | Q2 |
| IPI00031564; | GGCT     | 43.1 | 3.05E-79  | -0.250 | 7  | 3.1  | Q2 |
| IPI00002895  | SUPT4H1  | 19.7 | 1.62E-05  | -0.248 | 3  | 20.0 | Q2 |
| IPI00024976  | TOMM22   | 66.2 | 1.27E-176 | -0.247 | 5  | 8.6  | Q2 |
| IPI00873294; | BLMH     | 4.3  | 4.83E-14  | -0.246 | 2  | 14.4 | Q2 |
| IPI00232533; | EIF1AX   | 45.8 | 3.42E-45  | -0.244 | 8  | 7.5  | Q2 |
| IPI00299033; | KPNA3    | 12.1 | 6.05E-94  | -0.243 | 6  | 8.3  | Q2 |
| IPI00031556; | U2AF2    | 15.4 | 1.52E-98  | -0.241 | 8  | 30.8 | Q2 |
| IPI00555597; | PTRH2    | 39.4 | 8.37E-145 | -0.241 | 7  | 8.1  | Q2 |
| IPI00020956; | HDGF     | 45   | 2.30E-90  | -0.241 | 13 | 11.5 | Q2 |
| IPI00022442  | NDUFAB1  | 15.4 | 1.97E-06  | -0.239 | 6  | 12.0 | Q2 |
| IPI00007402  | IPO7     | 24.2 | <1.0E-304 | -0.237 | 20 | 12.9 | Q2 |
| IPI00217553  | MRPL41   | 38.7 | 6.73E-34  | -0.236 | 6  | 13.9 | Q2 |
| IPI00028357; | XPO4     | 4.7  | 1.63E-27  | -0.234 | 2  | 6.7  | Q2 |
| IPI00549389; | METTL11A | 22.8 | 4.29E-48  | -0.230 | 2  | 7.4  | Q2 |
| IPI00304596; | NONO     | 37.2 | 8.87E-256 | -0.230 | 22 | 11.9 | Q2 |
| IPI00386189; | NARG1    | 32.4 | 3.90E-120 | -0.230 | 16 | 18.6 | Q2 |
| IPI00005573; | NT5C     | 34.8 | 1.45E-15  | -0.230 | 2  | 3.0  | Q2 |
| IPI00796337; | PCBP2    | 21.6 | 2.90E-190 | -0.229 | 16 | 21.8 | Q2 |
| IPI00410693; | SERBP1   | 43.4 | 6.43E-156 | -0.228 | 27 | 28.7 | Q2 |



|              |                |      |           |        |    |      |    |
|--------------|----------------|------|-----------|--------|----|------|----|
| IPI00016746; | CBFB           | 23.6 | 1.04E-85  | -0.227 | 7  | 15.4 | Q2 |
| IPI00005613; | U2AF1          | 35   | 5.43E-93  | -0.226 | 7  | 11.8 | Q2 |
| IPI00290142; | CTPS           | 40.1 | 1.10E-213 | -0.226 | 11 | 13.2 | Q2 |
| IPI00304171; | H2AFY          | 45.2 | 2.50E-172 | -0.226 | 17 | 53.7 | Q2 |
| IPI00384497  | PTPLB          | 8.6  | 2.07E-06  | -0.225 | 2  | 23.8 | Q2 |
| IPI00023860; | NAP1L1         | 19.9 | 1.82E-235 | -0.224 | 17 | 14.5 | Q2 |
| IPI00001655; | C16orf80       | 16.6 | 1.69E-37  | -0.224 | 7  | 9.9  | Q2 |
| IPI00718888; | PRPS2          | 30.8 | 8.85E-157 | -0.222 | 9  | 10.0 | Q2 |
| IPI00641788; | SNRPC          | 11.7 | 1.51E-33  | -0.222 | 3  | 9.9  | Q2 |
| IPI00384857; | HN1            | 31.5 | 1.49E-87  | -0.220 | 3  | 18.3 | Q2 |
| IPI00549381  | MRPL1          | 24.3 | 1.40E-80  | -0.219 | 6  | 2.0  | Q2 |
| IPI00418313; | ILF3           | 33.1 | 1.37E-298 | -0.219 | 22 | 9.5  | Q2 |
| IPI00102069; | EIF3M          | 38   | 3.56E-224 | -0.219 | 15 | 19.2 | Q2 |
| IPI00867509; | CORO1C         | 31.3 | 1.03E-220 | -0.219 | 27 | 11.9 | Q2 |
| IPI00010080; | OXSRI          | 20.3 | 4.23E-179 | -0.218 | 11 | 25.1 | Q2 |
| IPI00845348; | DKFZp686N09117 | 6.2  | 6.07E-06  | -0.217 | 2  | 23.5 | Q2 |
| IPI00001546; | TIMM8B         | 50.6 | 5.41E-55  | -0.216 | 4  | 8.5  | Q2 |
| IPI00030654; | CPSF6          | 13.9 | 1.64E-87  | -0.216 | 3  | 34.2 | Q2 |
| IPI00003438  | DNAJC8         | 20.2 | 1.60E-10  | -0.216 | 4  | 10.8 | Q2 |
| IPI00789551; | MATR3          | 28.3 | 6.40E-196 | -0.215 | 20 | 18.0 | Q2 |
| IPI00170752; | TNS4           | 11.2 | 8.83E-11  | -0.213 | 3  | 2.4  | Q2 |
| IPI00183500; | NCBP2          | 16.7 | 1.26E-05  | -0.213 | 3  | 9.1  | Q2 |
| IPI00011274; | HNRPD1         | 18.8 | 4.52E-171 | -0.212 | 15 | 36.2 | Q2 |
| IPI00301204; | RDH13          | 16   | 6.04E-17  | -0.211 | 4  | 27.9 | Q2 |
| IPI00005511  | PHF5A          | 40.9 | 6.68E-28  | -0.210 | 8  | 24.7 | Q2 |
| IPI00794900  | MTHFD1         | 39.6 | <1.0E-304 | -0.210 | 24 | 9.6  | Q2 |
| IPI00414289; | GPS1           | 9.3  | 6.58E-32  | -0.209 | 4  | 8.4  | Q2 |
| IPI00012462; | EIF2A          | 14   | 4.11E-33  | -0.208 | 7  | 11.6 | Q2 |
| IPI00396378; | HNRNPA2B1      | 2.5  | 1.29E-302 | -0.208 | 4  | 52.2 | Q2 |
| IPI00513805; | MRPS18A        | 15.6 | 2.61E-07  | -0.208 | 5  | 4.6  | Q2 |
| IPI00295849; | RABGGTB        | 8.2  | 2.56E-05  | -0.208 | 2  | 5.5  | Q2 |
| IPI00793443; | IPO5           | 39.9 | <1.0E-304 | -0.208 | 30 | 45.9 | Q2 |
| IPI00844264; | DKFZp779B0247  | 25.1 | 1.90E-263 | -0.208 | 10 | 11.7 | Q2 |
| IPI00642046; | RSL1D1         | 28   | 8.94E-148 | -0.206 | 5  | 8.5  | Q2 |
| IPI00294779; | VDAC3          | 39.8 | 5.40E-96  | -0.204 | 5  | 14.9 | Q2 |

|              |          |      |           |        |    |      |    |
|--------------|----------|------|-----------|--------|----|------|----|
| IPI00061108; | MRRF     | 21.4 | 8.64E-41  | -0.204 | 3  | 7.7  | Q2 |
| IPI00215914; | ARF1     | 69.1 | 5.76E-180 | -0.202 | 23 | 49.6 | Q2 |
| IPI00013068; | EIF3E    | 47.9 | 1.22E-199 | -0.201 | 19 | 7.2  | Q2 |
| IPI00012831  | HBXIP    | 5.8  | 6.19E-03  | -0.201 | 4  | 52.8 | Q2 |
| IPI00024642; | CCDC47   | 19.7 | 8.01E-77  | -0.198 | 7  | 8.4  | Q2 |
| IPI00216746; | HNRNPK   | 48.9 | <1.0E-304 | -0.198 | 48 | 28.6 | Q2 |
| IPI00029558; | NDUFC2   | 12.6 | 2.47E-02  | -0.197 | 4  | 16.8 | Q2 |
| IPI00927647; | POR      | 11.5 | 6.71E-24  | -0.196 | 3  | 6.9  | Q2 |
| IPI00027626; | CCT6A    | 51.4 | 1.68E-297 | -0.196 | 36 | 7.5  | Q2 |
| IPI00031820; | FARSA    | 25.8 | 1.97E-102 | -0.195 | 10 | 10.9 | Q2 |
| IPI00008223; | RAD23B   | 21.8 | 8.94E-141 | -0.194 | 13 | 6.6  | Q2 |
| IPI00386616  | C1orf212 | 39.1 | 6.62E-05  | -0.194 | 4  | 21.7 | Q2 |
| IPI00290204; | SNRNP70  | 19.7 | 5.85E-14  | -0.194 | 7  | 19.0 | Q2 |
| IPI00015897; | CHORDC1  | 18.7 | 9.62E-62  | -0.194 | 5  | 10.1 | Q2 |
| IPI00307409; | MRPL9    | 19.1 | 5.17E-23  | -0.193 | 5  | 12.8 | Q2 |
| IPI00303207  | ABCE1    | 30.2 | 1.34E-195 | -0.193 | 9  | 6.2  | Q2 |
| IPI00448798; | CSNK1A1  | 37.5 | 3.77E-108 | -0.191 | 17 | 51.4 | Q2 |
| IPI00332511; | PPP2R2A  | 19.7 | 6.67E-82  | -0.190 | 9  | 9.9  | Q2 |
| IPI00011126; | PSMC1    | 33   | 6.84E-203 | -0.187 | 13 | 12.8 | Q2 |
| IPI00827508; | RPL10A   | 53.4 | 7.23E-214 | -0.187 | 7  | 14.6 | Q2 |
| IPI00025239  | NDUFS2   | 12.7 | 9.83E-20  | -0.186 | 6  | 11.3 | Q2 |
| IPI00293434; | SRP14    | 40.4 | 1.61E-67  | -0.185 | 7  | 7.3  | Q2 |
| IPI00181728  | BXDC2    | 21.2 | 2.10E-88  | -0.185 | 4  | 5.7  | Q2 |
| IPI00021187; | RUVBL1   | 48.2 | 2.74E-293 | -0.185 | 25 | 8.9  | Q2 |
| IPI00005978; | SFRS2    | 33.5 | 1.26E-128 | -0.184 | 20 | 55.8 | Q2 |
| IPI00020468; | SELS     | 11.1 | 7.23E-07  | -0.184 | 2  | 7.8  | Q2 |
| IPI00304306; | DNAJC19  | 33.6 | 4.16E-08  | -0.184 | 4  | 13.1 | Q2 |
| IPI00419373; | HNRNPA3  | 31.5 | 8.85E-218 | -0.183 | 15 | 15.7 | Q2 |
| IPI00293078  | DDX27    | 10.1 | 5.54E-35  | -0.183 | 2  | 19.1 | Q2 |
| IPI00018465; | CCT7     | 51.9 | <1.0E-304 | -0.183 | 39 | 14.1 | Q2 |
| IPI00008433; | RPS5     | 45.6 | 6.02E-168 | -0.182 | 21 | 14.9 | Q2 |
| IPI00300096; | RAB35    | 24.9 | 8.11E-33  | -0.182 | 5  | 9.3  | Q2 |
| IPI00017334; | PHB      | 60.3 | 4.16E-229 | -0.181 | 17 | 18.5 | Q2 |
| IPI00005087; | TMOD3    | 44.3 | 1.38E-300 | -0.181 | 16 | 7.6  | Q2 |
| IPI00654777; | EIF3F    | 39.5 | 2.60E-130 | -0.181 | 12 | 11.6 | Q2 |

|              |         |      |           |        |    |      |    |
|--------------|---------|------|-----------|--------|----|------|----|
| IPI00398009; | IPO4    | 10.4 | 3.85E-70  | -0.180 | 3  | 10.7 | Q2 |
| IPI00218606; | RPS23   | 29.4 | 5.55E-22  | -0.179 | 15 | 25.4 | Q2 |
| IPI00003833  | MTCH2   | 48.2 | 5.74E-185 | -0.177 | 6  | 6.5  | Q2 |
| IPI00291695; | GPX8    | 24.4 | 2.80E-10  | -0.177 | 3  | 13.2 | Q2 |
| IPI00032439; | POLR1D  | 28.6 | 3.69E-28  | -0.176 | 4  | 11.6 | Q2 |
| IPI00295772; | CYP51A1 | 22.4 | 6.64E-129 | -0.176 | 11 | 15.7 | Q2 |
| IPI00011107  | IDH2    | 23.2 | 2.71E-60  | -0.176 | 8  | 16.0 | Q2 |
| IPI00032827  | SF3B14  | 60   | 3.00E-43  | -0.175 | 10 | 8.7  | Q2 |
| IPI00397904; | NUP93   | 31.3 | 4.32E-209 | -0.175 | 8  | 11.1 | Q2 |
| IPI00922511; | F11R    | 35.6 | 8.32E-62  | -0.175 | 8  | 14.3 | Q2 |
| IPI00010136; | CTBP2   | 7.9  | 4.32E-30  | -0.174 | 5  | 8.4  | Q2 |
| IPI00218054  | SELH    | 18   | 1.46E-21  | -0.174 | 2  | 3.3  | Q2 |
| IPI00414860; | RPL37A  | 51.1 | 3.02E-52  | -0.174 | 7  | 25.1 | Q2 |
| IPI00844214; | CTNBL1  | 9.9  | 1.93E-14  | -0.173 | 3  | 2.9  | Q2 |
| IPI00018398  | PSMC3   | 38.7 | 8.60E-159 | -0.172 | 20 | 19.1 | Q2 |
| IPI00007818; | CPSF3   | 5.4  | 2.55E-08  | -0.171 | 2  | 8.0  | Q2 |
| IPI00012197  | DCTPP1  | 44.1 | 5.30E-63  | -0.168 | 5  | 12.7 | Q2 |
| IPI00005740; | COX4NB  | 29   | 9.08E-29  | -0.168 | 4  | 2.8  | Q2 |
| IPI00013847; | UQCRC1  | 17.5 | 1.50E-61  | -0.167 | 8  | 16.0 | Q2 |
| IPI00000494; | RPL5    | 44.8 | 2.42E-272 | -0.167 | 26 | 13.5 | Q2 |
| IPI00019812; | PPP5C   | 7.2  | 1.29E-31  | -0.167 | 3  | 10.9 | Q2 |
| IPI00217030; | RPS4X   | 69.6 | 9.85E-198 | -0.167 | 9  | 20.2 | Q2 |
| IPI00641950; | GNB2L1  | 68.2 | 8.87E-288 | -0.167 | 38 | 25.1 | Q2 |
| IPI00016249; | FXR1    | 11.6 | 1.42E-31  | -0.167 | 3  | 12.6 | Q2 |
| IPI00783271; | LRPPRC  | 48.1 | <1.0E-304 | -0.165 | 19 | 10.2 | Q2 |
| IPI00009771; | LMNB2   | 36.3 | 4.14E-199 | -0.165 | 18 | 13.7 | Q2 |
| IPI00006725; | DDX23   | 8.9  | 5.23E-25  | -0.164 | 3  | 6.1  | Q2 |
| IPI00001734; | PSAT1   | 27.5 | 1.05E-46  | -0.163 | 10 | 12.0 | Q2 |
| IPI00007765; | HSPA9   | 45.8 | <1.0E-304 | -0.162 | 42 | 14.8 | Q2 |
| IPI00853201; | MRPL23  | 27.2 | 1.46E-33  | -0.162 | 4  | 6.9  | Q2 |
| IPI00028481; | RAB8A   | 33.8 | 1.14E-97  | -0.162 | 7  | 53.6 | Q2 |
| IPI00329596; | TMX2    | 12.1 | 1.17E-24  | -0.161 | 3  | 24.0 | Q2 |
| IPI00293464; | DDB1    | 35.6 | 4.79E-237 | -0.161 | 16 | 30.7 | Q2 |
| IPI00479306; | PSMB5   | 42.2 | 1.00E-111 | -0.160 | 14 | 10.5 | Q2 |
| IPI00099996  | RG9MTD1 | 30   | 5.23E-107 | -0.160 | 7  | 11.0 | Q2 |

|              |                |      |           |        |     |      |    |
|--------------|----------------|------|-----------|--------|-----|------|----|
| IPI00792352; | RAN            | 44.9 | 2.25E-164 | -0.160 | 14  | 25.5 | Q2 |
| IPI00013146; | MRPS22         | 31.7 | 5.64E-59  | -0.160 | 10  | 16.9 | Q2 |
| IPI00216951; | DARS           | 55.9 | 1.63E-175 | -0.159 | 29  | 15.1 | Q2 |
| IPI00791613; | DKFZp686L04275 | 1.5  | <1.0E-304 | -0.158 | 2   | 4.9  | Q2 |
| IPI00008438; | RPS10          | 47.9 | 1.57E-102 | -0.157 | 22  | 14.2 | Q2 |
| IPI00024674  | MAP2K4         | 10   | 3.61E-46  | -0.157 | 2   | 17.7 | Q2 |
| IPI00006979  | LYRM4          | 31.9 | 1.95E-11  | -0.155 | 2   | 33.2 | Q2 |
| IPI00185146  | IPO9           | 20   | 4.05E-145 | -0.155 | 4   | 8.2  | Q2 |
| IPI00009342; | IQGAP1         | 51.5 | <1.0E-304 | -0.154 | 20  | 14.4 | Q2 |
| IPI00003918; | RPL4           | 48.9 | <1.0E-304 | -0.154 | 60  | 20.2 | Q2 |
| IPI00911039  | HSPA1A         | 1.5  | <1.0E-304 | -0.154 | 2   | 4.9  | Q2 |
| IPI00872664; | USP14          | 26.3 | 4.57E-94  | -0.154 | 13  | 11.7 | Q2 |
| IPI00009867; | KRT5           | 46.8 | <1.0E-304 | -0.154 | 236 | 63.2 | Q2 |
| IPI00021728; | EIF2S2         | 40.5 | 2.04E-78  | -0.154 | 11  | 16.9 | Q2 |
| IPI00293425; | FXN            | 11   | 3.37E-05  | -0.153 | 4   | 47.8 | Q2 |
| IPI00100313; | PCID2          | 4.9  | 2.23E-04  | -0.152 | 2   | 5.9  | Q2 |
| IPI00003394; | SMN1           | 14.3 | 5.43E-16  | -0.152 | 3   | 22.8 | Q2 |
| IPI00429191  | ETF1           | 30.2 | 2.51E-92  | -0.152 | 21  | 13.7 | Q2 |
| IPI00010720; | CCT5           | 50.1 | 2.96E-275 | -0.152 | 30  | 13.2 | Q2 |
| IPI00025721; | COPS3          | 18.7 | 1.61E-32  | -0.151 | 6   | 15.8 | Q2 |
| IPI00647650; | EIF3H          | 35.2 | 4.13E-74  | -0.151 | 14  | 7.3  | Q2 |
| IPI00419880; | RPS3A          | 63.6 | 6.48E-200 | -0.151 | 45  | 29.4 | Q2 |
| IPI00021812; | AHNAK          | 71.8 | <1.0E-304 | -0.151 | 59  | 61.0 | Q2 |
| IPI00215637; | DDX3X          | 40   | 8.49E-293 | -0.150 | 28  | 14.2 | Q2 |
| IPI00013415; | RPS7           | 49.5 | 1.71E-63  | -0.150 | 13  | 16.3 | Q2 |
| IPI00295992; | ATAD3A         | 18.9 | 2.64E-56  | -0.150 | 10  | 12.1 | Q2 |
| IPI00000816; | YWHAE          | 75.7 | <1.0E-304 | -0.150 | 14  | 22.4 | Q2 |
| IPI00003843; | TJP2           | 35.1 | 8.89E-278 | -0.149 | 2   | 47.2 | Q2 |
| IPI00221300; | EIF2B1         | 29.5 | 4.79E-69  | -0.149 | 7   | 12.1 | Q2 |
| IPI00007277; | LRRFIP2        | 2.8  | 1.00E-44  | -0.149 | 3   | 7.8  | Q2 |
| IPI00025084; | CAPNS1         | 51.9 | 3.51E-204 | -0.148 | 8   | 20.2 | Q2 |
| IPI00064193; | TMX3           | 5.3  | 2.31E-03  | -0.147 | 3   | 6.6  | Q2 |
| IPI00910513; | GSPT1          | 18.2 | 2.30E-69  | -0.146 | 9   | 5.4  | Q2 |
| IPI00013296; | RPS18          | 66.4 | 9.12E-70  | -0.146 | 39  | 23.9 | Q2 |
| IPI00186290; | EEF2           | 64.3 | <1.0E-304 | -0.146 | 105 | 18.3 | Q2 |

|              |          |      |           |        |    |      |    |
|--------------|----------|------|-----------|--------|----|------|----|
| IPI00219381  | NDUFA2   | 19.2 | 1.41E-04  | -0.146 | 2  | 1.1  | Q2 |
| IPI00018522; | PRMT1    | 47.2 | 2.88E-237 | -0.145 | 16 | 12.5 | Q2 |
| IPI00304925; | HSPA1A   | 44.1 | <1.0E-304 | -0.145 | 28 | 9.3  | Q2 |
| IPI00394758; | ALDH3A2  | 12.6 | 2.46E-57  | -0.145 | 2  | 8.3  | Q2 |
| IPI00479997; | STMN1    | 63.1 | 1.33E-53  | -0.145 | 13 | 16.3 | Q2 |
| IPI00640088; | CSNK2B   | 44.4 | 1.55E-114 | -0.145 | 4  | 8.5  | Q2 |
| IPI00550746; | NUDC     | 47.4 | 3.79E-127 | -0.144 | 11 | 5.8  | Q2 |
| IPI00004670; | GALNT3   | 6    | 6.26E-13  | -0.144 | 3  | 2.9  | Q2 |
| IPI00219155; | RPL27    | 55.9 | 9.71E-40  | -0.143 | 17 | 30.0 | Q2 |
| IPI00005158; | LONP1    | 9.9  | 1.12E-52  | -0.143 | 2  | 12.8 | Q2 |
| IPI00019326  | FDX1     | 9.8  | 5.25E-06  | -0.142 | 3  | 0.3  | Q2 |
| IPI00014238; | KARS     | 30.8 | 5.46E-97  | -0.141 | 15 | 22.9 | Q2 |
| IPI00873344; | TPD52    | 40.7 | 2.39E-111 | -0.140 | 5  | 17.5 | Q2 |
| IPI00219678; | EIF2S1   | 58.7 | 1.19E-190 | -0.140 | 24 | 9.1  | Q2 |
| IPI00335385  | DCPS     | 11.3 | 9.03E-04  | -0.140 | 2  | 6.6  | Q2 |
| IPI00027252; | PHB2     | 68.2 | 3.96E-258 | -0.140 | 25 | 10.3 | Q2 |
| IPI00009104; | RUVBL2   | 43.2 | 3.26E-274 | -0.139 | 19 | 14.9 | Q2 |
| IPI00873403; | RPL24    | 34.1 | 4.04E-60  | -0.139 | 21 | 27.8 | Q2 |
| IPI00100160; | CAND1    | 36.7 | <1.0E-304 | -0.139 | 27 | 18.8 | Q2 |
| IPI00003704; | RBM4     | 20.1 | 3.12E-49  | -0.138 | 4  | 3.7  | Q2 |
| IPI00456887; | HNRNPUL2 | 31.3 | 2.30E-221 | -0.138 | 9  | 16.0 | Q2 |
| IPI00218463; | TIMM16   | 38.4 | 1.53E-87  | -0.138 | 4  | 2.8  | Q2 |
| IPI00297492; | STT3A    | 9.4  | 1.15E-24  | -0.137 | 14 | 35.8 | Q2 |
| IPI00298961; | XPO1     | 37   | <1.0E-304 | -0.136 | 19 | 9.7  | Q2 |
| IPI00154590; | MKI67IP  | 21.5 | 2.30E-82  | -0.135 | 8  | 16.7 | Q2 |
| IPI00029012  | EIF3A    | 43   | 1.44E-244 | -0.134 | 9  | 12.6 | Q2 |
| IPI00009057; | G3BP2    | 13.1 | 2.65E-87  | -0.134 | 4  | 10.7 | Q2 |
| IPI00871174; | MYCBP    | 29.4 | 3.56E-14  | -0.131 | 4  | 6.1  | Q2 |
| IPI00001589  | TIMM13   | 73.7 | 1.84E-213 | -0.131 | 10 | 14.1 | Q2 |
| IPI00413108; | RPSA     | 61.3 | <1.0E-304 | -0.131 | 35 | 54.2 | Q2 |
| IPI00017367; | RDX      | 22   | 1.91E-162 | -0.131 | 8  | 35.1 | Q2 |
| IPI00025491; | EIF4A1   | 60.6 | <1.0E-304 | -0.130 | 50 | 14.4 | Q2 |
| IPI00026337; | RANBP3   | 8.8  | 2.09E-36  | -0.130 | 2  | 2.0  | Q2 |
| IPI00333763  | GLRX5    | 19.7 | 7.56E-24  | -0.129 | 7  | 8.1  | Q2 |
| IPI00024933; | RPL12    | 71.5 | 8.86E-262 | -0.128 | 15 | 19.9 | Q2 |

|              |          |      |           |        |    |      |    |
|--------------|----------|------|-----------|--------|----|------|----|
| IPI00926977; | PSMC6    | 45.7 | 1.12E-200 | -0.128 | 20 | 21.3 | Q2 |
| IPI00185374; | PSMD12   | 36   | 7.56E-154 | -0.127 | 19 | 11.1 | Q2 |
| IPI00465233; | EIF3EIP  | 34.9 | 9.20E-221 | -0.127 | 21 | 10.5 | Q2 |
| IPI00744711; | PNPT1    | 9.8  | 8.63E-11  | -0.126 | 2  | 26.9 | Q2 |
| IPI00015148; | RAP1B    | 41.8 | 1.19E-102 | -0.126 | 8  | 14.4 | Q2 |
| IPI00336047; | MYO9B    | 1    | 2.60E-04  | -0.125 | 4  | 35.7 | Q2 |
| IPI00852685; | DIAPH1   | 29.5 | <1.0E-304 | -0.125 | 2  | 9.0  | Q2 |
| IPI00376798; | RPL11    | 46.1 | 2.73E-58  | -0.125 | 13 | 17.1 | Q2 |
| IPI00010214  | S100A14  | 61.5 | 1.23E-85  | -0.124 | 12 | 12.7 | Q2 |
| IPI00001639; | KPNB1    | 39.2 | <1.0E-304 | -0.124 | 30 | 31.6 | Q2 |
| IPI00152981; | ACAD9    | 8.7  | 5.38E-05  | -0.122 | 4  | 7.4  | Q2 |
| IPI00016613; | CSNK2A1  | 34.3 | 2.03E-95  | -0.122 | 8  | 19.2 | Q2 |
| IPI00887241; | RPS28    | 35.2 | 1.42E-29  | -0.121 | 14 | 16.4 | Q2 |
| IPI00250297  | AASDHPPT | 20.7 | 1.60E-51  | -0.121 | 5  | 10.7 | Q2 |
| IPI00014312; | CUL3     | 7.6  | 2.92E-39  | -0.121 | 6  | 10.5 | Q2 |
| IPI00002968  | MOCS2    | 21.6 | 1.81E-02  | -0.120 | 4  | 41.9 | Q2 |
| IPI00024364; | TNPO1    | 22.4 | 9.56E-177 | -0.120 | 13 | 17.1 | Q2 |
| IPI00219383; | NDUFB3   | 21.4 | 4.15E-06  | -0.120 | 4  | 17.8 | Q2 |
| IPI00413324; | RPL17    | 55.4 | 4.13E-90  | -0.119 | 23 | 24.0 | Q2 |
| IPI00030320  | DDX6     | 24.4 | 8.39E-89  | -0.119 | 13 | 15.9 | Q2 |
| IPI00034049; | UPF1     | 41.5 | 2.88E-235 | -0.119 | 12 | 15.5 | Q2 |
| IPI00215777; | SLC25A3  | 45.4 | 2.07E-221 | -0.119 | 18 | 9.6  | Q2 |
| IPI00300074  | FARSB    | 37   | 2.11E-109 | -0.119 | 18 | 19.5 | Q2 |
| IPI00215878; | ATP5E    | 45.1 | 1.87E-02  | -0.116 | 3  | 19.4 | Q2 |
| IPI00215884; | SFRS1    | 51.2 | 1.90E-137 | -0.116 | 22 | 30.8 | Q2 |
| IPI00549189; | THOP1    | 15.7 | 2.73E-60  | -0.115 | 3  | 11.3 | Q2 |
| IPI00300127; | NAT10    | 20.5 | 1.28E-159 | -0.115 | 3  | 19.9 | Q2 |
| IPI00465028; | TPI1     | 71.7 | <1.0E-304 | -0.114 | 7  | 62.2 | Q2 |
| IPI00783872; | CAPRIN1  | 15.1 | 1.23E-51  | -0.114 | 6  | 5.9  | Q2 |
| IPI00024143; | AAAS     | 7    | 4.74E-22  | -0.113 | 3  | 26.0 | Q2 |
| IPI00783559  | EXOC2    | 5.7  | 6.80E-20  | -0.113 | 2  | 36.2 | Q2 |
| IPI00642032; | TXNL1    | 41.5 | 1.28E-167 | -0.113 | 13 | 14.0 | Q2 |
| IPI00642238; | HP1BP3   | 14.8 | 3.73E-16  | -0.112 | 2  | 3.1  | Q2 |
| IPI00646839; | EIF3CL   | 26.1 | 1.46E-118 | -0.111 | 12 | 9.8  | Q2 |
| IPI00305166; | SDHA     | 20.8 | 4.03E-122 | -0.111 | 4  | 7.4  | Q2 |

|              |         |      |           |        |     |      |    |
|--------------|---------|------|-----------|--------|-----|------|----|
| IPI00872754; | STK24   | 15.1 | 6.21E-140 | -0.110 | 10  | 9.9  | Q2 |
| IPI00025366; | CS      | 23.2 | 7.88E-81  | -0.110 | 12  | 78.8 | Q2 |
| IPI00005668; | AKR1C2  | 9.6  | 2.39E-05  | -0.110 | 2   | 3.5  | Q2 |
| IPI00428288; | MRPL43  | 42.1 | 1.25E-46  | -0.110 | 7   | 7.6  | Q2 |
| IPI00550021; | RPL3    | 44.7 | 1.01E-171 | -0.107 | 39  | 22.7 | Q2 |
| IPI00026530  | LMAN1   | 12.4 | 1.15E-35  | -0.107 | 5   | 9.8  | Q2 |
| IPI00395694; | TNPO3   | 6.8  | 6.63E-123 | -0.107 | 2   | 9.6  | Q2 |
| IPI00304612; | RPL13A  | 49.3 | 5.33E-72  | -0.107 | 18  | 20.5 | Q2 |
| IPI00219677; | DERA    | 22.3 | 7.44E-24  | -0.107 | 2   | 18.2 | Q2 |
| IPI00219229; | LSM3    | 25.5 | 3.47E-06  | -0.107 | 5   | 11.4 | Q2 |
| IPI00218319; | TPM3    | 72.6 | 3.78E-271 | -0.107 | 5   | 30.0 | Q2 |
| IPI00012079; | EIF4B   | 24.4 | 5.08E-50  | -0.106 | 9   | 11.7 | Q2 |
| IPI00029267  | SNRPB2  | 31.6 | 2.15E-17  | -0.105 | 4   | 1.5  | Q2 |
| IPI00295542; | NUCB1   | 19.7 | 4.00E-89  | -0.105 | 9   | 30.8 | Q2 |
| IPI00216247; | PSMD4   | 16.6 | 2.00E-87  | -0.104 | 5   | 7.6  | Q2 |
| IPI00147874; | NANS    | 27.9 | 2.13E-61  | -0.104 | 7   | 6.1  | Q2 |
| IPI00472171; | RPL7    | 59.5 | 1.16E-104 | -0.104 | 15  | 24.9 | Q2 |
| IPI00017448; | RPS21   | 63.9 | 2.90E-54  | -0.103 | 18  | 15.6 | Q2 |
| IPI00293655  | DDX1    | 28.1 | 3.67E-150 | -0.103 | 19  | 9.4  | Q2 |
| IPI00152658; | NEK7    | 16.2 | 3.63E-09  | -0.102 | 3   | 27.5 | Q2 |
| IPI00399265; | TPD52L2 | 52.8 | <1.0E-304 | -0.099 | 6   | 15.0 | Q2 |
| IPI00220578; | GNAI3   | 13.6 | 2.85E-69  | -0.098 | 2   | 24.2 | Q2 |
| IPI00182728; | VPS4B   | 18   | 4.78E-37  | -0.098 | 7   | 12.8 | Q2 |
| IPI00182289; | RPS29   | 48.2 | 9.36E-09  | -0.098 | 13  | 17.4 | Q2 |
| IPI00903119; | SMS     | 18.2 | 3.83E-101 | -0.097 | 8   | 9.3  | Q2 |
| IPI00795107; | TATDN1  | 20.1 | 4.52E-47  | -0.097 | 3   | 16.7 | Q2 |
| IPI00019450; | TROVE2  | 11.7 | 2.53E-58  | -0.097 | 4   | 5.9  | Q2 |
| IPI00003865; | HSPA8   | 65   | <1.0E-304 | -0.096 | 103 | 23.3 | Q2 |
| IPI00553185; | CCT3    | 57.6 | <1.0E-304 | -0.096 | 40  | 15.5 | Q2 |
| IPI00456758  | RPL27A  | 44.6 | 7.62E-46  | -0.095 | 20  | 14.1 | Q2 |
| IPI00290460; | EIF3G   | 35   | 1.32E-88  | -0.095 | 10  | 20.1 | Q2 |
| IPI00166865  | CISD2   | 47.4 | 8.33E-49  | -0.095 | 11  | 13.9 | Q2 |
| IPI00008530; | RPLP0   | 50.2 | 9.13E-247 | -0.094 | 19  | 10.4 | Q2 |
| IPI00020602  | CSNK2A2 | 18.6 | 3.94E-54  | -0.094 | 3   | 11.6 | Q2 |
| IPI00005264; | PKP2    | 21.2 | 3.45E-138 | -0.094 | 8   | 17.2 | Q2 |

|              |          |      |           |        |    |      |    |
|--------------|----------|------|-----------|--------|----|------|----|
| IPI00010349; | AGPS     | 15.3 | 4.59E-151 | -0.093 | 4  | 7.7  | Q2 |
| IPI00012795; | EIF3I    | 50.2 | 3.45E-132 | -0.093 | 16 | 60.3 | Q2 |
| IPI00003588; | EEF1E1   | 44.3 | 1.05E-36  | -0.093 | 6  | 22.9 | Q2 |
| IPI00019918; | DDX19A   | 21.8 | 2.96E-90  | -0.093 | 8  | 17.9 | Q2 |
| IPI00178431; | RECQL    | 19.3 | 6.23E-50  | -0.093 | 9  | 9.2  | Q2 |
| IPI00171573; | CCDC109A | 22.5 | 7.11E-23  | -0.093 | 4  | 10.4 | Q2 |
| IPI00024290; | IRF6     | 29.8 | 1.68E-129 | -0.092 | 12 | 14.3 | Q2 |
| IPI00177965; | NT5DC1   | 11.4 | 6.26E-47  | -0.091 | 3  | 11.7 | Q2 |
| IPI00027107  | TUFM     | 59.8 | 8.92E-287 | -0.090 | 31 | 16.5 | Q2 |
| IPI00382470; | HSP90AA1 | 32.8 | <1.0E-304 | -0.090 | 41 | 26.7 | Q2 |
| IPI00022479  | HERC1    | 0.7  | 2.67E-05  | -0.090 | 3  | 65.9 | Q2 |
| IPI00790739; | ACO2     | 35   | 3.42E-250 | -0.090 | 16 | 24.9 | Q2 |
| IPI00018873; | NAMPT    | 32   | 8.01E-206 | -0.090 | 14 | 7.4  | Q2 |
| IPI00215780; | RPS19    | 69   | 3.98E-54  | -0.089 | 33 | 12.1 | Q2 |
| IPI00031697; | TMEM109  | 9.1  | 2.25E-20  | -0.087 | 4  | 13.4 | Q2 |
| IPI00160421  | MRPL18   | 22.2 | 1.09E-29  | -0.087 | 3  | 10.1 | Q2 |
| IPI00019380; | NCBP1    | 10.6 | 3.07E-27  | -0.087 | 3  | 16.3 | Q2 |
| IPI00012268; | PSMD2    | 44.4 | <1.0E-304 | -0.086 | 23 | 12.3 | Q2 |
| IPI00103142  | NUDCD2   | 30.6 | 3.42E-73  | -0.085 | 2  | 5.1  | Q2 |
| IPI00012442; | G3BP1    | 39.7 | 3.23E-263 | -0.084 | 19 | 19.4 | Q2 |
| IPI00927455; | HIGD1A   | 18.8 | 2.39E-56  | -0.083 | 2  | 6.4  | Q2 |
| IPI00011916; | AIMP2    | 17.5 | 2.23E-87  | -0.083 | 6  | 6.1  | Q2 |
| IPI00396329; | BXDC1    | 19.3 | 1.06E-15  | -0.083 | 6  | 14.5 | Q2 |
| IPI00386114; | SF1      | 9.5  | 2.29E-07  | -0.082 | 2  | 25.3 | Q2 |
| IPI00871856; | STIP1    | 54.7 | 2.90E-233 | -0.081 | 28 | 11.6 | Q2 |
| IPI00290566; | CCT1     | 54   | <1.0E-304 | -0.081 | 31 | 39.9 | Q2 |
| IPI00003168; | PRPSAP2  | 13   | 3.10E-26  | -0.080 | 3  | 10.9 | Q2 |
| IPI00872177; | PPP1CB   | 14.4 | 9.77E-282 | -0.080 | 5  | 5.4  | Q2 |
| IPI00019927  | PSMD7    | 38.6 | 6.27E-86  | -0.080 | 10 | 8.0  | Q2 |
| IPI00025091  | RPS11    | 62   | 6.54E-75  | -0.079 | 35 | 18.6 | Q2 |
| IPI00023086; | MRPL15   | 23   | 1.55E-83  | -0.079 | 6  | 18.9 | Q2 |
| IPI00168388; | SRP68    | 17.9 | 1.26E-63  | -0.078 | 5  | 7.6  | Q2 |
| IPI00002324; | MAT2B    | 19.5 | 3.09E-51  | -0.078 | 9  | 17.9 | Q2 |
| IPI00018768; | TSN      | 29.8 | 3.72E-76  | -0.078 | 5  | 7.4  | Q2 |
| IPI00029731; | RPL35A   | 45.5 | 6.84E-10  | -0.078 | 21 | 19.2 | Q2 |



|              |         |      |           |        |    |      |    |
|--------------|---------|------|-----------|--------|----|------|----|
| IPI00100748; | HSPBP1  | 17.8 | 2.45E-48  | -0.077 | 7  | 16.3 | Q2 |
| IPI00220739; | PGRMC1  | 34.9 | 9.94E-107 | -0.077 | 8  | 24.3 | Q2 |
| IPI00219153; | RPL22   | 32   | 2.80E-57  | -0.077 | 13 | 16.4 | Q2 |
| IPI00000811; | PSMB6   | 23.4 | 1.37E-21  | -0.077 | 11 | 25.3 | Q2 |
| IPI00784119; | ATP6AP1 | 7    | 1.74E-11  | -0.076 | 3  | 15.4 | Q2 |
| IPI00172591  | MRPL17  | 34.3 | 1.11E-10  | -0.076 | 7  | 17.9 | Q2 |
| IPI00156032; | KRR1    | 4.7  | 2.19E-04  | -0.076 | 2  | 18.5 | Q2 |
| IPI00011201; | ME2     | 9.2  | 3.56E-63  | -0.076 | 2  | 1.8  | Q2 |
| IPI00054042; | GTF2I   | 22.5 | 5.90E-94  | -0.075 | 3  | 22.2 | Q2 |
| IPI00375677; | MRPL21  | 19.6 | 3.28E-11  | -0.075 | 4  | 5.3  | Q2 |
| IPI00093057  | CPOX    | 6.8  | 1.16E-19  | -0.074 | 2  | 19.4 | Q2 |
| IPI00219604; | MAP2K1  | 23.7 | 9.60E-15  | -0.074 | 8  | 8.8  | Q2 |
| IPI00026202; | RPL18A  | 51.1 | 2.58E-96  | -0.074 | 14 | 13.1 | Q2 |
| IPI00015954; | SAR1A   | 43.9 | 1.48E-56  | -0.072 | 6  | 17.4 | Q2 |
| IPI00301280; | TMEM43  | 18.8 | 1.60E-120 | -0.072 | 4  | 4.2  | Q2 |
| IPI00396563; | UBXN1   | 17.6 | 1.34E-13  | -0.071 | 4  | 6.5  | Q2 |
| IPI00103994; | LARS    | 42   | <1.0E-304 | -0.071 | 19 | 44.6 | Q2 |
| IPI00027270; | RPL26   | 40   | 5.90E-19  | -0.071 | 28 | 13.3 | Q2 |
| IPI00171438; | TXNDC5  | 23.1 | 1.93E-63  | -0.071 | 10 | 14.3 | Q2 |
| IPI00247583; | RPL21   | 42.5 | 1.45E-89  | -0.070 | 19 | 18.2 | Q2 |
| IPI00107104; | CXorf26 | 41.2 | 3.27E-119 | -0.070 | 9  | 9.0  | Q2 |
| IPI00008575; | KHDRBS1 | 18.5 | 2.93E-63  | -0.070 | 11 | 29.0 | Q2 |
| IPI00022239  | METAP1  | 13.7 | 5.12E-51  | -0.070 | 3  | 13.1 | Q2 |
| IPI00023919; | PSMC5   | 52.2 | 1.07E-228 | -0.069 | 19 | 8.6  | Q2 |
| IPI00016669  | RHEB    | 35.9 | 1.25E-17  | -0.069 | 7  | 7.6  | Q2 |
| IPI00025273; | GART    | 37.5 | <1.0E-304 | -0.069 | 27 | 14.0 | Q2 |
| IPI00412607; | RPL35   | 39   | 4.31E-14  | -0.068 | 8  | 21.6 | Q2 |
| IPI00008240; | MARS    | 29.2 | 7.84E-287 | -0.067 | 10 | 12.8 | Q2 |
| IPI00105598; | PSMD11  | 55.6 | 4.66E-218 | -0.067 | 26 | 47.8 | Q2 |
| IPI00446875; | ERGIC3  | 3.9  | 1.63E-02  | -0.066 | 2  | 47.9 | Q2 |
| IPI00030706  | AHSA1   | 40.8 | 1.44E-113 | -0.066 | 13 | 22.9 | Q2 |
| IPI00011416; | ECH1    | 24.7 | 1.92E-118 | -0.066 | 4  | 10.1 | Q2 |
| IPI00306301; | PDHA1   | 21.3 | 1.05E-32  | -0.065 | 7  | 15.6 | Q2 |
| IPI00299088; | BAIAP2  | 21.7 | 1.86E-38  | -0.065 | 7  | 29.0 | Q2 |
| IPI00026087; | BANF1   | 42.7 | 1.96E-29  | -0.065 | 6  | 15.0 | Q2 |

|              |          |      |           |        |    |      |    |
|--------------|----------|------|-----------|--------|----|------|----|
| IPI00025815; | TARDBP   | 10.8 | 2.59E-30  | -0.065 | 3  | 9.5  | Q2 |
| IPI00305383  | UQCRC2   | 32.9 | 2.36E-162 | -0.064 | 7  | 16.6 | Q2 |
| IPI00215948; | CTNNA1   | 51   | <1.0E-304 | -0.064 | 31 | 10.0 | Q2 |
| IPI00218071  | HS3ST5   | 2.9  | 4.67E-02  | -0.064 | 2  | 9.9  | Q2 |
| IPI00216057; | SORD     | 31.7 | 1.81E-113 | -0.063 | 7  | 30.3 | Q2 |
| IPI00017763; | NAP1L4   | 33.7 | 1.11E-255 | -0.063 | 14 | 13.6 | Q2 |
| IPI00925713; | RPL10    | 54.3 | 1.96E-97  | -0.063 | 24 | 9.2  | Q2 |
| IPI00890743; | PPP6C    | 25.1 | 2.49E-90  | -0.063 | 6  | 10.8 | Q2 |
| IPI00450472; | UBE2I    | 33.7 | 6.77E-126 | -0.061 | 7  | 14.9 | Q2 |
| IPI00032406  | DNAJA2   | 16   | 2.01E-76  | -0.061 | 8  | 9.8  | Q2 |
| IPI00025086  | COX5A    | 21.3 | 2.55E-47  | -0.061 | 7  | 9.0  | Q2 |
| IPI00015602; | TOMM70A  | 11.7 | 1.42E-121 | -0.061 | 3  | 1.0  | Q2 |
| IPI00031691; | RPL9     | 56.8 | 4.87E-157 | -0.060 | 13 | 7.1  | Q2 |
| IPI00022597  | UBE2M    | 42.1 | 6.87E-79  | -0.060 | 9  | 5.4  | Q2 |
| IPI00221088; | RPS9     | 59.8 | 1.01E-82  | -0.059 | 23 | 22.2 | Q2 |
| IPI00420108; | DLST     | 19.6 | 1.87E-68  | -0.059 | 13 | 24.3 | Q2 |
| IPI00306159; | MECR     | 4.6  | 1.68E-02  | -0.058 | 3  | 9.5  | Q2 |
| IPI00218728; | PAFAH1B1 | 20.2 | 6.13E-78  | -0.058 | 8  | 7.5  | Q2 |
| IPI00018120; | DAP3     | 20.1 | 2.03E-87  | -0.058 | 5  | 8.2  | Q2 |
| IPI00016610  | PCBP1    | 39   | 1.53E-254 | -0.058 | 26 | 13.5 | Q2 |
| IPI00441473; | PRMT5    | 20.7 | 1.19E-111 | -0.057 | 9  | 11.2 | Q2 |
| IPI00411984; | STK3     | 14.6 | 4.74E-40  | -0.056 | 6  | 7.4  | Q2 |
| IPI00012578  | KPNA4    | 8.4  | 1.32E-92  | -0.056 | 5  | 18.5 | Q2 |
| IPI00022002; | MRPS27   | 12.6 | 1.41E-22  | -0.056 | 5  | 16.4 | Q2 |
| IPI00299608; | PSMD1    | 26.3 | 5.52E-228 | -0.054 | 13 | 16.2 | Q2 |
| IPI00292020  | SRM      | 39.4 | 9.90E-103 | -0.054 | 10 | 10.5 | Q2 |
| IPI00022277  | CCDC56   | 37.7 | 3.94E-15  | -0.053 | 6  | 4.3  | Q2 |
| IPI00061531; | MRPL53   | 41.1 | 3.32E-40  | -0.053 | 7  | 19.3 | Q2 |
| IPI00294879; | RANGAP1  | 40.4 | <1.0E-304 | -0.053 | 19 | 9.2  | Q2 |
| IPI00915363; | RPS24    | 18.3 | 1.94E-65  | -0.053 | 6  | 12.5 | Q2 |
| IPI00017292; | CTNNB1   | 21.9 | 1.32E-179 | -0.053 | 7  | 21.3 | Q2 |
| IPI00012202; | WDR77    | 10.5 | 1.77E-48  | -0.052 | 7  | 19.8 | Q2 |
| IPI00002506; | ALG5     | 16.4 | 1.83E-14  | -0.052 | 4  | 10.4 | Q2 |
| IPI00148063  | HEBP1    | 31.2 | 3.80E-47  | -0.052 | 5  | 26.4 | Q2 |
| IPI00026271; | RPS14    | 39.7 | 1.85E-175 | -0.052 | 25 | 17.9 | Q2 |

|              |         |      |           |        |    |      |    |
|--------------|---------|------|-----------|--------|----|------|----|
| IPI00856045; | AHNAK2  | 48.5 | <1.0E-304 | -0.051 | 3  | 21.8 | Q2 |
| IPI00301936; | ELAVL1  | 31.7 | 1.37E-111 | -0.051 | 17 | 14.3 | Q2 |
| IPI00018206; | GOT2    | 47.7 | 1.95E-215 | -0.051 | 21 | 8.5  | Q2 |
| IPI00239077; | HINT1   | 23.8 | 5.03E-28  | -0.050 | 5  | 24.0 | Q2 |
| IPI00221091; | RPS15A  | 35.4 | 1.03E-11  | -0.050 | 33 | 11.9 | Q2 |
| IPI00788907; | PGAM5   | 42.2 | 1.09E-59  | -0.048 | 9  | 14.9 | Q2 |
| IPI00221117; | ACYP1   | 30.3 | 7.90E-15  | -0.048 | 2  | 6.8  | Q2 |
| IPI00015671; | TUBAL3  | 3.8  | 3.73E-37  | -0.047 | 2  | 10.9 | Q2 |
| IPI00291608; | PCNP    | 24.2 | 4.10E-23  | -0.047 | 3  | 10.5 | Q2 |
| IPI00375824; | DPH5    | 8.8  | 2.06E-02  | -0.046 | 3  | 17.0 | Q2 |
| IPI00642971; | EEF1D   | 26.1 | 1.69E-233 | -0.046 | 26 | 10.6 | Q2 |
| IPI00016513  | RAB10   | 50   | 6.51E-111 | -0.045 | 11 | 34.6 | Q2 |
| IPI00099986; | FN3KRP  | 9.1  | 2.17E-02  | -0.045 | 3  | 10.5 | Q2 |
| IPI00290857  | KRT3    | 1.6  | 1.85E-52  | -0.045 | 5  | 8.5  | Q2 |
| IPI00874200; | MRPS33  | 31.2 | 1.37E-06  | -0.044 | 6  | 16.4 | Q2 |
| IPI00553131; | GALE    | 35.6 | 2.01E-78  | -0.044 | 9  | 6.1  | Q2 |
| IPI00013949; | SGTA    | 32.9 | 5.65E-90  | -0.043 | 9  | 10.4 | Q2 |
| IPI00303476; | ATP5B   | 61.1 | <1.0E-304 | -0.042 | 59 | 23.6 | Q2 |
| IPI00013241; | UBL5    | 49.3 | 1.67E-09  | -0.042 | 5  | 24.2 | Q2 |
| IPI00470502; | PPA2    | 30.1 | 6.92E-89  | -0.040 | 8  | 11.1 | Q2 |
| IPI00295889; | SRP19   | 37.5 | 1.45E-70  | -0.040 | 5  | 11.7 | Q2 |
| IPI00016703; | DHCR24  | 17.6 | 6.53E-47  | -0.039 | 8  | 7.7  | Q2 |
| IPI00025329; | RPL19   | 33.7 | 1.01E-117 | -0.039 | 4  | 10.3 | Q2 |
| IPI00220766  | GLO1    | 61.4 | 7.74E-107 | -0.039 | 14 | 9.2  | Q2 |
| IPI00061245  | MRPS10  | 17.9 | 1.89E-19  | -0.038 | 2  | 2.7  | Q2 |
| IPI00005719; | RAB1A   | 70.2 | 7.18E-269 | -0.037 | 34 | 56.5 | Q2 |
| IPI00102425; | RPRD1A  | 16   | 2.80E-29  | -0.037 | 3  | 8.5  | Q2 |
| IPI00011876; | MTAP    | 60.3 | 2.42E-266 | -0.037 | 13 | 39.8 | Q2 |
| IPI00004758; | LDLRAP1 | 6.8  | 4.40E-32  | -0.036 | 2  | 0.1  | Q2 |
| IPI00291643  | SPRYD4  | 20.8 | 1.85E-09  | -0.035 | 4  | 17.3 | Q2 |
| IPI00022421; | COX7A2L | 33.3 | 3.58E-17  | -0.035 | 5  | 10.2 | Q2 |
| IPI00472160; | ARHGEF2 | 10.8 | 1.17E-36  | -0.035 | 3  | 3.3  | Q2 |
| IPI00100106; | RIC8A   | 5.2  | 4.79E-06  | -0.035 | 3  | 22.3 | Q2 |
| IPI00171903; | HNRNPM  | 53.4 | <1.0E-304 | -0.034 | 35 | 27.7 | Q2 |
| IPI00479262; | EIF4G1  | 26.7 | <1.0E-304 | -0.034 | 3  | 9.2  | Q2 |

|              |         |      |           |        |    |      |    |
|--------------|---------|------|-----------|--------|----|------|----|
| IPI00219757; | GSTP1   | 67.1 | <1.0E-304 | -0.033 | 18 | 32.0 | Q2 |
| IPI00001676; | NPLOC4  | 10.7 | 1.84E-92  | -0.032 | 2  | 10.7 | Q2 |
| IPI00216190; | GSK3B   | 14.5 | 6.16E-18  | -0.032 | 4  | 13.5 | Q2 |
| IPI00024403; | CPNE3   | 25.7 | 2.82E-133 | -0.031 | 16 | 22.2 | Q2 |
| IPI00375380; | PSMD13  | 42.1 | 5.80E-176 | -0.030 | 17 | 6.2  | Q2 |
| IPI00001145  | AP4S1   | 6.9  | 5.29E-03  | -0.029 | 2  | 6.9  | Q2 |
| IPI00296022; | UQCRH   | 25.3 | 2.31E-03  | -0.029 | 7  | 7.9  | Q2 |
| IPI00022254; | ATG3    | 10.2 | 4.06E-15  | -0.029 | 3  | 9.3  | Q2 |
| IPI00220063  | NDUFS5  | 13.2 | 1.80E-02  | -0.029 | 2  | 2.1  | Q2 |
| IPI00645446; | MCTS1   | 46.7 | 2.46E-157 | -0.029 | 9  | 9.1  | Q2 |
| IPI00646086; | RPL39   | 10.1 | 4.30E-02  | -0.027 | 2  | 4.8  | Q2 |
| IPI00007729; | NOL7    | 6.6  | 3.57E-04  | -0.027 | 2  | 19.2 | Q2 |
| IPI00910781; | GPI     | 37.3 | 6.55E-265 | -0.027 | 28 | 9.1  | Q2 |
| IPI00106966; | TMEM70  | 11.2 | 1.41E-07  | -0.027 | 3  | 5.6  | Q2 |
| IPI00168262; | GLT25D1 | 8.4  | 9.21E-09  | -0.026 | 5  | 16.4 | Q2 |
| IPI00019345; | RAP1A   | 15.2 | 1.69E-56  | -0.025 | 3  | 8.7  | Q2 |
| IPI00001871  | PAWR    | 11.8 | 9.70E-63  | -0.025 | 2  | 3.4  | Q2 |
| IPI00061525; | GNPNAT1 | 45.7 | 1.98E-166 | -0.024 | 2  | 20.9 | Q2 |
| IPI00479905; | NDUFB10 | 51.2 | 1.30E-45  | -0.024 | 3  | 18.9 | Q2 |
| IPI00329672; | MYO1E   | 27.2 | 1.13E-243 | -0.024 | 10 | 19.3 | Q2 |
| IPI00299554  | KIF14   | 1.1  | 9.92E-08  | -0.023 | 3  | 9.6  | Q2 |
| IPI00220301; | PRDX6   | 63.8 | 3.41E-297 | -0.023 | 13 | 27.2 | Q2 |
| IPI00023876; | CASP6   | 10.2 | 7.34E-15  | -0.023 | 3  | 23.7 | Q2 |
| IPI00017283  | IARS2   | 17.3 | 6.10E-76  | -0.021 | 7  | 14.6 | Q2 |
| IPI00337386; | PRPF40A | 12.3 | 1.81E-17  | -0.021 | 4  | 14.6 | Q2 |
| IPI00021435; | PSMC2   | 52.7 | 1.08E-159 | -0.021 | 28 | 15.6 | Q2 |
| IPI00018813; | COPS2   | 29.1 | 1.86E-77  | -0.020 | 7  | 8.7  | Q2 |
| IPI00008552  | GLRX3   | 42.4 | 7.26E-117 | -0.020 | 12 | 9.2  | Q2 |
| IPI00479743; | POTEE   | 2.4  | 4.67E-246 | -0.019 | 3  | 8.7  | Q2 |
| IPI00550069  | RNH1    | 56.6 | <1.0E-304 | -0.018 | 30 | 10.5 | Q2 |
| IPI00874144; | MRPS6   | 29.6 | 1.13E-17  | -0.018 | 5  | 29.4 | Q2 |
| IPI00719752; | EIF3B   | 37   | 2.35E-296 | -0.017 | 23 | 16.2 | Q2 |
| IPI00221093; | RPS17   | 63   | 1.44E-204 | -0.017 | 22 | 23.0 | Q2 |
| IPI00376478  | CMC1    | 9.4  | 6.05E-03  | -0.017 | 2  | 35.6 | Q2 |
| IPI00007074  | YARS    | 33.9 | 1.73E-38  | -0.017 | 18 | 8.9  | Q2 |

|              |          |      |           |        |    |      |    |
|--------------|----------|------|-----------|--------|----|------|----|
| IPI00031397; | ACSL3    | 20.4 | 1.76E-214 | -0.016 | 7  | 14.0 | Q2 |
| IPI00291006; | MDH2     | 65.7 | <1.0E-304 | -0.015 | 31 | 46.5 | Q2 |
| IPI00179713; | IGF2BP2  | 28.9 | 8.73E-129 | -0.015 | 16 | 23.5 | Q2 |
| IPI00010105; | EIF6     | 60   | 2.18E-295 | -0.015 | 8  | 5.6  | Q2 |
| IPI00169285  | PLBD2    | 4.9  | 2.88E-09  | -0.015 | 4  | 76.1 | Q2 |
| IPI00010153; | RPL23    | 57.9 | 1.01E-193 | -0.015 | 41 | 18.0 | Q2 |
| IPI00011603; | PSMD3    | 32.8 | 3.16E-219 | -0.014 | 16 | 12.2 | Q2 |
| IPI00219160; | RPL34    | 37.6 | 1.66E-14  | -0.013 | 17 | 39.4 | Q2 |
| IPI00220300; | ATP5J2   | 27.7 | 2.02E-17  | -0.013 | 3  | 13.9 | Q2 |
| IPI00028946; | RTN3     | 15.3 | 3.43E-18  | -0.013 | 2  | 16.2 | Q2 |
| IPI00008380; | PPP2CA   | 48.2 | 3.42E-231 | -0.013 | 15 | 8.3  | Q2 |
| IPI00007084  | SLC25A13 | 21   | 5.83E-192 | -0.013 | 5  | 16.4 | Q2 |
| IPI00293746; | MMTAG2   | 10.3 | 5.50E-08  | -0.012 | 2  | 20.0 | Q2 |
| IPI00440493; | ATP5A1   | 56.1 | <1.0E-304 | -0.012 | 42 | 21.4 | Q2 |
| IPI00019269; | WDR61    | 18.7 | 8.51E-37  | -0.011 | 4  | 18.6 | Q2 |
| IPI00872940; | RPL30    | 77.4 | 3.15E-150 | -0.011 | 23 | 11.0 | Q2 |
| IPI00924713; | PCYT1A   | 16.3 | 1.31E-91  | -0.010 | 4  | 6.9  | Q2 |
| IPI00015018; | PPA1     | 80.6 | <1.0E-304 | -0.009 | 27 | 12.5 | Q2 |
| IPI00289807; | TRNT1    | 6.5  | 2.34E-05  | -0.009 | 3  | 8.8  | Q2 |
| IPI00216308; | VDAC1    | 71.7 | <1.0E-304 | -0.009 | 22 | 11.0 | Q2 |
| IPI00298406; | HADH     | 20   | 3.57E-43  | -0.008 | 8  | 6.8  | Q2 |
| IPI00107753; | OPA1     | 11.6 | 1.71E-48  | -0.008 | 3  | 45.2 | Q2 |
| IPI00290198  | IL18     | 31.6 | 3.70E-60  | -0.007 | 4  | 2.3  | Q2 |
| IPI00171844  | COPS4    | 20   | 4.88E-92  | -0.006 | 5  | 19.4 | Q2 |
| IPI00018288; | POLR2C   | 34.2 | 1.09E-158 | -0.006 | 3  | 50.4 | Q2 |
| IPI00028160; | HMBS     | 13   | 3.05E-150 | -0.006 | 4  | 19.9 | Q2 |
| IPI00182540; | CTNND1   | 29.5 | 2.70E-299 | -0.006 | 9  | 11.5 | Q2 |
| IPI00008418; | DIABLO   | 16.5 | 4.62E-27  | -0.005 | 3  | 61.5 | Q2 |
| IPI00747810; | FSCN1    | 55.2 | <1.0E-304 | -0.005 | 56 | 24.2 | Q2 |
| IPI00023334; | MRPL4    | 19   | 7.01E-42  | -0.004 | 3  | 51.9 | Q2 |
| IPI00026833  | ADSS     | 21.3 | 5.74E-86  | -0.003 | 9  | 13.0 | Q2 |
| IPI00004860; | RARS     | 47   | <1.0E-304 | -0.002 | 20 | 19.1 | Q2 |
| IPI00012750; | RPS25    | 35.2 | 1.89E-26  | -0.002 | 17 | 18.5 | Q2 |
| IPI00000005  | NRAS     | 39.2 | 2.94E-54  | -0.001 | 2  | 1.5  | Q2 |
| IPI00893315; | CGI-59   | 13.3 | 7.68E-10  | 0.000  | 2  | 4.3  | Q2 |

|              |          |      |           |       |     |      |    |
|--------------|----------|------|-----------|-------|-----|------|----|
| IPI00843975; | EZR      | 40.8 | 1.03E-291 | 0.000 | 30  | 14.0 | Q2 |
| IPI00783625; | SERPINB5 | 63.5 | <1.0E-304 | 0.000 | 57  | 17.2 | Q2 |
| IPI00220644; | PKM2     | 3.2  | <1.0E-304 | 0.000 | 2   | 0.0  | Q3 |
| IPI00030847; | TM9SF3   | 4.9  | 2.84E-09  | 0.001 | 2   | 6.3  | Q2 |
| IPI00221089  | RPS13    | 51   | 1.15E-62  | 0.002 | 20  | 15.9 | Q2 |
| IPI00021370; | UBE2K    | 50.5 | 6.38E-91  | 0.003 | 13  | 9.3  | Q2 |
| IPI00009790; | PFKP     | 38.4 | <1.0E-304 | 0.003 | 25  | 14.4 | Q2 |
| IPI00030363; | ACAT1    | 29   | 2.62E-182 | 0.004 | 8   | 17.8 | Q2 |
| IPI00024320; | RBM3     | 31.8 | 5.33E-62  | 0.004 | 7   | 18.4 | Q2 |
| IPI00294536; | STRAP    | 58.7 | 1.27E-193 | 0.004 | 21  | 11.0 | Q2 |
| IPI00794806; | PPM2C    | 3.2  | 1.67E-04  | 0.004 | 3   | 2.8  | Q2 |
| IPI00003269  | ACTBL2   | 8.5  | 1.84E-100 | 0.004 | 13  | 34.9 | Q2 |
| IPI00300725; | KRT6A    | 67.4 | <1.0E-304 | 0.005 | 391 | 92.8 | Q2 |
| IPI00014151; | PSMD6    | 42.4 | 1.08E-128 | 0.005 | 16  | 9.0  | Q2 |
| IPI00414676; | HSP90AB1 | 63.8 | <1.0E-304 | 0.005 | 79  | 30.4 | Q2 |
| IPI00419266  | NDUFA6   | 22.1 | 8.09E-05  | 0.005 | 5   | 45.0 | Q2 |
| IPI00029744; | SSBP1    | 43.2 | 1.32E-122 | 0.006 | 12  | 11.8 | Q2 |
| IPI00867714; | LSM12    | 13.6 | 7.17E-29  | 0.006 | 3   | 10.8 | Q2 |
| IPI00793201; | AIMP1    | 17.3 | 1.53E-25  | 0.006 | 6   | 9.6  | Q2 |
| IPI00032325; | CSTA     | 77.6 | 8.68E-113 | 0.007 | 14  | 18.3 | Q2 |
| IPI00374364; | C7orf59  | 8.4  | 2.71E-08  | 0.007 | 5   | 16.7 | Q2 |
| IPI00299084  | TMEM33   | 30.4 | 3.69E-52  | 0.008 | 3   | 1.5  | Q2 |
| IPI00009950  | LMAN2    | 27.5 | 1.31E-88  | 0.008 | 5   | 22.4 | Q2 |
| IPI00021417; | SART1    | 12.4 | 1.90E-22  | 0.008 | 2   | 29.0 | Q2 |
| IPI00334159  | VBP1     | 33.5 | 2.12E-59  | 0.008 | 5   | 15.1 | Q2 |
| IPI00293817; | NAPG     | 19.2 | 4.04E-19  | 0.008 | 6   | 5.2  | Q2 |
| IPI00477982; | RPS6KA1  | 13.4 | 3.44E-71  | 0.008 | 5   | 22.9 | Q2 |
| IPI00293026; | EFTUD1   | 19.3 | 2.04E-109 | 0.009 | 2   | 9.7  | Q2 |
| IPI00332395; | CPNE9    | 1.6  | 6.43E-04  | 0.009 | 4   | 22.5 | Q2 |
| IPI00604414; | PLAU     | 6.7  | 1.96E-05  | 0.009 | 3   | 13.8 | Q2 |
| IPI00221092; | RPS16    | 69.9 | 2.09E-51  | 0.010 | 33  | 22.1 | Q2 |
| IPI00005537; | MRPL12   | 39.9 | 1.44E-52  | 0.011 | 7   | 11.1 | Q2 |
| IPI00306661  | KCMF1    | 7.9  | 2.52E-63  | 0.011 | 2   | 2.5  | Q2 |
| IPI00329373  | QIL1     | 10.2 | 2.14E-01  | 0.012 | 6   | 18.5 | Q2 |
| IPI00058192; | POFUT1   | 10.8 | 1.44E-23  | 0.012 | 2   | 3.7  | Q2 |

|              |          |      |           |       |    |      |    |
|--------------|----------|------|-----------|-------|----|------|----|
| IPI00744692; | TALDO1   | 40.7 | 7.83E-105 | 0.012 | 21 | 10.4 | Q2 |
| IPI00005038; | HRSP12   | 15.3 | 7.58E-12  | 0.013 | 5  | 13.8 | Q2 |
| IPI00011454; | GANAB    | 40.5 | <1.0E-304 | 0.013 | 25 | 7.3  | Q2 |
| IPI00103252; | RWDD4A   | 15.4 | 5.22E-09  | 0.014 | 3  | 12.1 | Q2 |
| IPI00299573; | RPL7A    | 50   | <1.0E-304 | 0.014 | 36 | 22.2 | Q2 |
| IPI00657888; | GMPPA    | 11.6 | 3.35E-108 | 0.015 | 3  | 3.3  | Q2 |
| IPI00479058; | RPS15    | 31   | 5.03E-103 | 0.016 | 7  | 12.3 | Q2 |
| IPI00031461; | GDI2     | 70.8 | <1.0E-304 | 0.016 | 50 | 10.1 | Q2 |
| IPI00397571; | NSFL1C   | 29   | 4.25E-77  | 0.017 | 11 | 9.9  | Q2 |
| IPI00218187; | PPP1CC   | 7.1  | 1.25E-300 | 0.017 | 2  | 1.4  | Q2 |
| IPI00409684; | NCKAP1   | 17.2 | 4.56E-94  | 0.018 | 6  | 10.8 | Q2 |
| IPI00008527; | RPLP1    | 51.8 | 1.33E-111 | 0.018 | 4  | 3.1  | Q2 |
| IPI00031064  | TMEM126A | 29.2 | 6.46E-50  | 0.018 | 7  | 5.9  | Q2 |
| IPI00555956  | PSMB4    | 31.8 | 3.15E-191 | 0.018 | 4  | 10.4 | Q2 |
| IPI00031131; | APMAP    | 16.8 | 7.87E-32  | 0.018 | 5  | 17.5 | Q2 |
| IPI00010810; | ETFFA    | 48.3 | 2.23E-253 | 0.019 | 12 | 8.1  | Q2 |
| IPI00013917; | RPS12    | 71.2 | 5.87E-163 | 0.019 | 21 | 20.4 | Q2 |
| IPI00005490  | GOLPH3   | 23.2 | 1.38E-137 | 0.020 | 5  | 12.9 | Q2 |
| IPI00019329  | DYNLL1   | 57.3 | 3.47E-72  | 0.020 | 5  | 19.2 | Q2 |
| IPI00005179; | POLR1C   | 12.4 | 3.28E-112 | 0.020 | 2  | 36.0 | Q2 |
| IPI00328867; | SRC      | 18.5 | 9.41E-58  | 0.020 | 8  | 13.6 | Q2 |
| IPI00291922  | PSMA5    | 52.3 | 7.20E-192 | 0.022 | 3  | 11.9 | Q2 |
| IPI00289535; | PMPCB    | 8.6  | 8.81E-15  | 0.022 | 5  | 16.3 | Q2 |
| IPI00019004; | SEC62    | 9    | 1.56E-05  | 0.023 | 3  | 49.8 | Q2 |
| IPI00022697; | DRG2     | 14.6 | 1.71E-83  | 0.024 | 4  | 12.7 | Q2 |
| IPI00219078; | ATP2A2   | 29   | <1.0E-304 | 0.024 | 15 | 9.0  | Q2 |
| IPI00012833  | PPP4C    | 27   | 9.68E-147 | 0.024 | 6  | 19.3 | Q2 |
| IPI00009346  | TMEM14C  | 24.1 | 6.26E-16  | 0.025 | 2  | 2.9  | Q2 |
| IPI00027448  | ATP5L    | 55.3 | 2.05E-80  | 0.025 | 11 | 20.2 | Q2 |
| IPI00015029; | PTGES3   | 36.9 | 2.13E-94  | 0.025 | 8  | 9.8  | Q2 |
| IPI00464979; | SUCLA2   | 8    | 6.39E-16  | 0.026 | 5  | 9.8  | Q2 |
| IPI00300299  | SPCS3    | 15   | 1.61E-09  | 0.026 | 2  | 12.4 | Q2 |
| IPI00021327; | GRB2     | 48.4 | 1.33E-44  | 0.028 | 7  | 20.1 | Q2 |
| IPI00218848  | ATP5I    | 40.3 | 8.02E-05  | 0.028 | 13 | 25.9 | Q2 |
| IPI00219029; | GOT1     | 41.2 | 5.06E-147 | 0.029 | 10 | 7.7  | Q2 |

|              |          |      |           |       |     |      |    |
|--------------|----------|------|-----------|-------|-----|------|----|
| IPI00024913; | C21orf33 | 39.9 | 3.30E-27  | 0.029 | 7   | 4.2  | Q2 |
| IPI00647286; | C9orf88  | 30.6 | 3.63E-228 | 0.029 | 10  | 8.6  | Q2 |
| IPI00073779; | MRPS35   | 10.5 | 4.06E-20  | 0.030 | 5   | 12.1 | Q2 |
| IPI00006482; | ATP1A1   | 34.3 | <1.0E-304 | 0.032 | 15  | 13.3 | Q2 |
| IPI00790214; | RCN2     | 12.8 | 1.30E-77  | 0.032 | 3   | 4.0  | Q2 |
| IPI00301051; | NHLRC2   | 6.6  | 1.97E-18  | 0.032 | 2   | 17.6 | Q2 |
| IPI00165506  | POLDIP2  | 14.7 | 7.12E-56  | 0.033 | 5   | 7.3  | Q2 |
| IPI00021440; | ACTG1    | 77.3 | <1.0E-304 | 0.033 | 233 | 41.5 | Q2 |
| IPI00009958; | COP55    | 33.2 | 2.97E-43  | 0.033 | 8   | 8.0  | Q2 |
| IPI00291946; | USP10    | 14.8 | 6.64E-87  | 0.033 | 2   | 4.6  | Q2 |
| IPI00873899; | ABCF1    | 13.1 | 1.92E-130 | 0.034 | 2   | 8.1  | Q2 |
| IPI00456008; | ATP5J    | 28.4 | 1.09E-57  | 0.034 | 5   | 9.2  | Q2 |
| IPI00871854; | SAMM50   | 15.8 | 2.18E-13  | 0.035 | 7   | 15.8 | Q2 |
| IPI00893857; | NDUFA11  | 14.9 | 1.07E-04  | 0.035 | 2   | 19.5 | Q2 |
| IPI00794659; | RPS20    | 24.6 | 2.19E-45  | 0.035 | 17  | 20.4 | Q2 |
| IPI00478231; | RHOA     | 59.6 | 4.08E-243 | 0.035 | 31  | 30.6 | Q2 |
| IPI00007752; | TUBB2C   | 19.3 | <1.0E-304 | 0.035 | 27  | 38.3 | Q2 |
| IPI00795922; | MRPS28   | 20.8 | 1.04E-09  | 0.036 | 4   | 0.6  | Q2 |
| IPI00028004; | PSMB3    | 49.8 | 2.25E-210 | 0.036 | 6   | 9.7  | Q2 |
| IPI00291669  | UBLCP1   | 12.6 | 1.11E-16  | 0.036 | 6   | 10.8 | Q2 |
| IPI00014577; | RAB18    | 51   | 9.01E-144 | 0.036 | 6   | 10.8 | Q2 |
| IPI00026302; | RPL31    | 48   | 3.90E-42  | 0.037 | 17  | 17.2 | Q2 |
| IPI00025874; | RPN1     | 37   | 1.22E-299 | 0.038 | 20  | 8.6  | Q2 |
| IPI00032872; | MRPS16   | 34.3 | 2.59E-20  | 0.038 | 4   | 6.1  | Q2 |
| IPI00025019; | PSMB1    | 53.1 | 3.67E-175 | 0.038 | 15  | 14.2 | Q2 |
| IPI00219622; | PSMA2    | 54.3 | 7.85E-228 | 0.038 | 8   | 10.3 | Q2 |
| IPI00021405; | LMNA     | 65.4 | <1.0E-304 | 0.039 | 93  | 25.1 | Q2 |
| IPI00792838; | C19orf42 | 9.7  | 1.78E-07  | 0.039 | 3   | 0.5  | Q2 |
| IPI00020042; | PSMC4    | 31.8 | 1.09E-173 | 0.039 | 12  | 9.4  | Q2 |
| IPI00013459; | NDUFB5   | 14.8 | 1.64E-24  | 0.039 | 2   | 7.6  | Q2 |
| IPI00045051  | PURB     | 6.1  | 2.19E-09  | 0.039 | 2   | 23.0 | Q2 |
| IPI00514587; | SARS     | 29.7 | 3.99E-83  | 0.041 | 14  | 15.9 | Q2 |
| IPI00003925; | PDHB     | 42.9 | 1.50E-242 | 0.041 | 16  | 11.7 | Q2 |
| IPI00003320  | C11orf10 | 10.1 | 1.68E-02  | 0.041 | 6   | 24.0 | Q2 |
| IPI00298558; | PDCD10   | 41   | 1.45E-104 | 0.041 | 6   | 13.5 | Q2 |



|              |          |      |           |       |    |      |    |
|--------------|----------|------|-----------|-------|----|------|----|
| IPI00018871; | ARL8B    | 26.9 | 1.11E-61  | 0.042 | 7  | 19.0 | Q2 |
| IPI00019353  | AGK      | 14   | 4.04E-58  | 0.042 | 5  | 6.5  | Q2 |
| IPI00411730; | PPP4R1   | 17.8 | 1.15E-123 | 0.042 | 6  | 31.2 | Q2 |
| IPI00021277; | NUBP1    | 10.6 | 7.81E-59  | 0.043 | 2  | 12.2 | Q2 |
| IPI00021570; | EDF1     | 35.1 | 1.81E-35  | 0.043 | 5  | 9.1  | Q2 |
| IPI00879750; | SNRPD3   | 26.9 | 4.01E-17  | 0.043 | 8  | 33.2 | Q2 |
| IPI00095891; | GNAS     | 6    | 3.98E-30  | 0.043 | 5  | 4.9  | Q2 |
| IPI00006052  | PFDN2    | 41.6 | 2.37E-69  | 0.043 | 11 | 7.6  | Q2 |
| IPI00165092  | YARS2    | 8.6  | 6.44E-28  | 0.043 | 3  | 8.2  | Q2 |
| IPI00010863  | ATOX1    | 50   | 3.53E-09  | 0.043 | 4  | 3.0  | Q2 |
| IPI00299149; | SUMO2    | 29.5 | 5.09E-26  | 0.043 | 9  | 11.6 | Q2 |
| IPI00170935  | LRRC47   | 24.4 | 6.15E-63  | 0.044 | 6  | 15.6 | Q2 |
| IPI00009901  | NUTF2    | 22.8 | 7.71E-04  | 0.044 | 6  | 28.9 | Q2 |
| IPI00556528; | PPP2R5E  | 5.8  | 2.54E-07  | 0.044 | 2  | 1.1  | Q2 |
| IPI00006579; | COX4I1   | 32.5 | 2.87E-34  | 0.044 | 18 | 20.5 | Q2 |
| IPI00216026; | VDAC2    | 52.4 | 2.32E-215 | 0.045 | 16 | 29.4 | Q2 |
| IPI00012512; | RRAS2    | 35.7 | 3.74E-93  | 0.045 | 6  | 12.2 | Q2 |
| IPI00178803; | PPP2R2C  | 1.6  | 1.68E-05  | 0.046 | 2  | 4.5  | Q2 |
| IPI00103057; | FAM36A   | 29.2 | 4.05E-30  | 0.048 | 4  | 11.2 | Q2 |
| IPI00853072; | KIAA0947 | 1.2  | 9.13E-03  | 0.048 | 4  | 21.9 | Q2 |
| IPI00015947; | DNAJB1   | 42.9 | 5.81E-93  | 0.048 | 12 | 18.8 | Q2 |
| IPI00028006; | PSMB2    | 35.3 | 3.60E-82  | 0.049 | 8  | 22.8 | Q2 |
| IPI00179330; | RPS27A   | 64.7 | 4.32E-127 | 0.049 | 93 | 19.0 | Q2 |
| IPI00295066; | MRPL48   | 16.5 | 1.86E-33  | 0.050 | 2  | 15.0 | Q2 |
| IPI00796934; | RPL29    | 14.5 | 7.92E-23  | 0.050 | 4  | 28.6 | Q2 |
| IPI00012007  | AHCY     | 49.5 | 9.08E-206 | 0.051 | 33 | 48.8 | Q2 |
| IPI00163644; | OSBPL8   | 9    | 3.05E-56  | 0.051 | 6  | 20.5 | Q2 |
| IPI00033030; | ADRM1    | 15.5 | 3.53E-35  | 0.051 | 7  | 5.8  | Q2 |
| IPI00301518; | MOBK1B   | 29.2 | 4.62E-29  | 0.052 | 5  | 12.4 | Q2 |
| IPI00029133; | ATP5F1   | 44.1 | 1.50E-72  | 0.052 | 9  | 9.0  | Q2 |
| IPI00909484; | CDC42    | 28.8 | 2.14E-58  | 0.053 | 10 | 40.7 | Q2 |
| IPI00219217; | LDHB     | 54.8 | <1.0E-304 | 0.053 | 47 | 23.2 | Q2 |
| IPI00027341; | CAPG     | 43.4 | 8.68E-170 | 0.054 | 12 | 8.4  | Q2 |
| IPI00000001; | STAU1    | 12.8 | 2.87E-59  | 0.055 | 5  | 9.5  | Q2 |
| IPI00414320; | ANXA11   | 27.4 | 2.10E-165 | 0.055 | 17 | 7.1  | Q2 |

|              |          |      |           |       |    |      |    |
|--------------|----------|------|-----------|-------|----|------|----|
| IPI00017672; | NP       | 76.8 | 4.16E-295 | 0.056 | 29 | 42.9 | Q2 |
| IPI00873459; | 10-Sep   | 13.8 | 6.20E-41  | 0.057 | 4  | 14.0 | Q2 |
| IPI00655650; | RPS26    | 37.4 | 2.41E-47  | 0.057 | 12 | 15.3 | Q2 |
| IPI00152900  | LZIC     | 19   | 6.47E-12  | 0.058 | 6  | 4.7  | Q2 |
| IPI00332525; | MRPL42   | 15.5 | 3.05E-06  | 0.058 | 2  | 11.1 | Q2 |
| IPI00004839  | CRKL     | 36.6 | 1.78E-153 | 0.059 | 6  | 9.5  | Q2 |
| IPI00816419  | C1orf151 | 48.7 | 7.16E-07  | 0.059 | 5  | 15.6 | Q2 |
| IPI00001091  | AFG3L2   | 6.3  | 3.21E-14  | 0.060 | 2  | 10.1 | Q2 |
| IPI00418290  | MRPL14   | 29.7 | 9.62E-24  | 0.060 | 5  | 5.3  | Q2 |
| IPI00026813; | FNTA     | 16.4 | 5.25E-91  | 0.060 | 4  | 4.4  | Q2 |
| IPI00217943; | RAB6A    | 62.5 | 5.09E-93  | 0.061 | 20 | 34.9 | Q2 |
| IPI00871891; | COMMD8   | 19.1 | 2.67E-21  | 0.061 | 3  | 13.2 | Q2 |
| IPI00220344; | RPL36A   | 46.2 | 5.45E-22  | 0.061 | 20 | 27.8 | Q2 |
| IPI00030702; | IDH3A    | 40.7 | 9.95E-126 | 0.062 | 13 | 14.0 | Q2 |
| IPI00007019  | PPIL1    | 20.5 | 3.98E-55  | 0.063 | 2  | 9.2  | Q2 |
| IPI00026216; | NPEPPS   | 28.4 | 3.89E-130 | 0.063 | 15 | 8.3  | Q2 |
| IPI00008529; | RPLP2    | 92.2 | <1.0E-304 | 0.063 | 25 | 44.7 | Q2 |
| IPI00790342; | RPL6     | 49.1 | 3.09E-120 | 0.063 | 46 | 27.8 | Q2 |
| IPI00554737; | PPP2R1A  | 47.9 | <1.0E-304 | 0.064 | 26 | 17.0 | Q2 |
| IPI00217519; | RALA     | 26.2 | 2.22E-41  | 0.064 | 3  | 10.6 | Q2 |
| IPI00306960; | NARS     | 32.7 | 8.67E-177 | 0.064 | 18 | 9.9  | Q2 |
| IPI00550451; | PPP1CA   | 49.1 | 2.37E-290 | 0.065 | 18 | 15.5 | Q2 |
| IPI00007675; | DYNC1LI1 | 11.3 | 7.38E-59  | 0.065 | 5  | 9.8  | Q2 |
| IPI00023064; | HRPAP20  | 45.7 | 3.04E-21  | 0.065 | 4  | 3.9  | Q2 |
| IPI00873622; | WDR1     | 29.3 | 1.50E-158 | 0.065 | 20 | 8.8  | Q2 |
| IPI00917683; | SUMO1    | 29.5 | 1.96E-13  | 0.066 | 5  | 15.7 | Q2 |
| IPI00026154; | PRKCSH   | 33.3 | 8.63E-215 | 0.067 | 15 | 52.9 | Q2 |
| IPI00024095; | ANXA3    | 72.8 | 1.30E-281 | 0.067 | 36 | 11.1 | Q2 |
| IPI00063903  | USMG5    | 43.1 | 1.79E-49  | 0.068 | 2  | 20.3 | Q2 |
| IPI00005745; | SPTLC1   | 12.5 | 6.99E-45  | 0.068 | 4  | 18.5 | Q2 |
| IPI00008274; | CAP1     | 61.9 | <1.0E-304 | 0.069 | 57 | 21.3 | Q2 |
| IPI00218465; | PLAA     | 13.7 | 3.80E-159 | 0.069 | 2  | 27.5 | Q2 |
| IPI00026824  | HMOX2    | 35.9 | 7.09E-83  | 0.069 | 16 | 15.6 | Q2 |
| IPI00339384; | RDH11    | 35.5 | 5.93E-113 | 0.070 | 7  | 11.5 | Q2 |
| IPI00011268; | RALY     | 34.2 | 3.29E-49  | 0.070 | 20 | 46.4 | Q2 |

|              |          |      |           |       |    |      |    |
|--------------|----------|------|-----------|-------|----|------|----|
| IPI00002857; | MAPK14   | 11.7 | 6.90E-18  | 0.070 | 3  | 17.3 | Q2 |
| IPI00099550; | UBQLN1   | 17.3 | 1.02E-53  | 0.070 | 5  | 11.2 | Q2 |
| IPI00024821; | PSMD14   | 43.5 | 2.29E-56  | 0.070 | 12 | 7.9  | Q2 |
| IPI00221325; | RANBP2   | 11.1 | 3.39E-238 | 0.071 | 3  | 21.4 | Q2 |
| IPI00016342; | RAB7A    | 85   | 7.10E-230 | 0.071 | 29 | 17.0 | Q2 |
| IPI00025160; | VAC14    | 4.5  | 4.03E-08  | 0.073 | 3  | 17.9 | Q2 |
| IPI00215920  | ARF6     | 30.3 | 1.62E-75  | 0.073 | 5  | 8.8  | Q2 |
| IPI00658109; | CKMT1A   | 50.8 | 1.95E-261 | 0.073 | 13 | 12.8 | Q2 |
| IPI00162330; | MRPL37   | 11.8 | 5.60E-28  | 0.074 | 2  | 15.7 | Q2 |
| IPI00902883; | RAPGEFL1 | 1.5  | 4.67E-02  | 0.074 | 4  | 42.7 | Q2 |
| IPI00410034; | SLC38A2  | 11.9 | 8.71E-40  | 0.074 | 4  | 51.6 | Q2 |
| IPI00003386  | RBX1     | 24.1 | 8.15E-49  | 0.075 | 3  | 19.1 | Q2 |
| IPI00748502; | CRTAP    | 11.5 | 1.80E-26  | 0.076 | 6  | 16.9 | Q2 |
| IPI00012585  | HEXB     | 29.5 | 1.27E-75  | 0.076 | 8  | 11.9 | Q2 |
| IPI00414442; | CDK5RAP3 | 9.6  | 7.24E-25  | 0.077 | 5  | 11.2 | Q2 |
| IPI00034010; | RWDD1    | 8.2  | 5.92E-09  | 0.078 | 3  | 8.7  | Q2 |
| IPI00291467; | SLC25A6  | 20.5 | 1.26E-128 | 0.078 | 6  | 38.4 | Q2 |
| IPI00291200; | NUP133   | 16.3 | 1.20E-179 | 0.079 | 2  | 16.2 | Q2 |
| IPI00748472; | KIAA0196 | 16.3 | 3.98E-59  | 0.079 | 2  | 13.1 | Q2 |
| IPI00152377; | STT3B    | 7    | 9.55E-40  | 0.080 | 2  | 2.0  | Q2 |
| IPI00021828  | CSTB     | 85.7 | 2.27E-54  | 0.081 | 13 | 19.7 | Q2 |
| IPI00016912  | TTC1     | 9.9  | 2.35E-07  | 0.081 | 2  | 10.9 | Q2 |
| IPI00016608; | TMED2    | 23.9 | 1.80E-20  | 0.081 | 6  | 8.0  | Q2 |
| IPI00009960; | IMMT     | 27.6 | 6.64E-247 | 0.082 | 15 | 32.7 | Q2 |
| IPI00009148; | NUDT3    | 18   | 1.69E-07  | 0.082 | 2  | 6.3  | Q2 |
| IPI00002496; | GMPPB    | 8.5  | 2.56E-08  | 0.083 | 3  | 8.9  | Q2 |
| IPI00384280; | PCYOX1   | 15.8 | 3.66E-68  | 0.084 | 9  | 30.9 | Q2 |
| IPI00013122  | CDC37    | 33.9 | 3.37E-158 | 0.084 | 11 | 4.5  | Q2 |
| IPI00010201; | PSMD8    | 20.3 | 9.60E-42  | 0.085 | 5  | 10.3 | Q2 |
| IPI00218568  | PCBD1    | 24   | 5.55E-04  | 0.085 | 3  | 4.8  | Q2 |
| IPI00015361; | PFDN5    | 59.1 | 1.44E-144 | 0.085 | 8  | 14.6 | Q2 |
| IPI00016605; | C1orf123 | 15   | 6.09E-03  | 0.086 | 3  | 6.8  | Q2 |
| IPI00163230; | COPS6    | 16.5 | 4.45E-21  | 0.086 | 4  | 15.0 | Q2 |
| IPI00032826; | ST13     | 24.9 | 9.13E-90  | 0.086 | 8  | 5.2  | Q2 |
| IPI00220416; | UQCRB    | 45.9 | 1.65E-21  | 0.087 | 9  | 15.8 | Q2 |

|              |         |      |           |       |     |       |    |
|--------------|---------|------|-----------|-------|-----|-------|----|
| IPI00183695  | S100A10 | 57.7 | 5.15E-12  | 0.088 | 15  | 20.2  | Q2 |
| IPI00023406  | HCCS    | 23.5 | 4.02E-32  | 0.088 | 4   | 16.7  | Q2 |
| IPI00002966; | HSPA4   | 55.8 | <1.0E-304 | 0.088 | 28  | 41.3  | Q2 |
| IPI00873472; | SEC24A  | 7    | 3.38E-43  | 0.089 | 3   | 7.8   | Q2 |
| IPI00172656  | FAF2    | 16.9 | 1.10E-55  | 0.089 | 4   | 13.4  | Q2 |
| IPI00642211; | RNPEP   | 17.9 | 2.90E-63  | 0.090 | 9   | 10.7  | Q2 |
| IPI00013031  | DUSP14  | 11.1 | 2.54E-12  | 0.090 | 2   | 29.5  | Q2 |
| IPI00009507; | SYPL1   | 8.5  | 8.19E-07  | 0.090 | 5   | 22.2  | Q2 |
| IPI00301579  | NPC2    | 36.8 | 7.98E-78  | 0.090 | 16  | 24.4  | Q2 |
| IPI00855940; | XPO7    | 15.7 | 2.63E-125 | 0.091 | 2   | 7.0   | Q2 |
| IPI00026519; | PPIF    | 30   | 6.03E-116 | 0.091 | 12  | 10.9  | Q2 |
| IPI00015911; | DLD     | 24.2 | 1.43E-285 | 0.091 | 8   | 6.4   | Q2 |
| IPI00013485; | RPS2    | 50.2 | 3.85E-186 | 0.092 | 27  | 19.0  | Q2 |
| IPI00554681; | NDUFA5  | 16.4 | 1.63E-11  | 0.093 | 3   | 29.4  | Q2 |
| IPI00328913; | VPS28   | 37.3 | 3.54E-102 | 0.093 | 6   | 24.2  | Q2 |
| IPI00410631; | FAM45A  | 13.4 | 5.62E-09  | 0.094 | 4   | 2.0   | Q2 |
| IPI00399053; | C3orf60 | 27.2 | 5.85E-09  | 0.094 | 4   | 19.1  | Q2 |
| IPI00012837; | KIF5B   | 43   | <1.0E-304 | 0.094 | 19  | 13.7  | Q2 |
| IPI00016339; | RAB5C   | 54.2 | 2.22E-175 | 0.094 | 10  | 61.0  | Q2 |
| IPI00024919; | PRDX3   | 30.9 | 4.07E-89  | 0.095 | 9   | 9.6   | Q2 |
| IPI00470649; | NCLN    | 18.3 | 4.02E-69  | 0.095 | 9   | 19.3  | Q2 |
| IPI00220487; | ATP5H   | 78.3 | 5.66E-142 | 0.096 | 8   | 10.4  | Q2 |
| IPI00303318; | FAM49B  | 29   | 1.44E-152 | 0.096 | 8   | 5.3   | Q2 |
| IPI00909853; | DDT     | 18.4 | 1.81E-46  | 0.096 | 4   | 4.2   | Q2 |
| IPI00396321  | LRRC59  | 42   | <1.0E-304 | 0.096 | 15  | 10.6  | Q2 |
| IPI00872668; | NIT2    | 36.7 | 2.68E-154 | 0.097 | 12  | 12.8  | Q2 |
| IPI00465248; | ENO1    | 69.8 | <1.0E-304 | 0.097 | 98  | 36.8  | Q2 |
| IPI00643567  | CAP1    | 9.2  | <1.0E-304 | 0.097 | 5   | 20.6  | Q2 |
| IPI00014197; | CDV3    | 14   | 4.80E-37  | 0.098 | 5   | 14.3  | Q2 |
| IPI00246058; | PDCD6IP | 42.2 | <1.0E-304 | 0.098 | 26  | 7.0   | Q2 |
| IPI00171412; | SUMF2   | 22.5 | 3.00E-41  | 0.098 | 6   | 125.6 | Q2 |
| IPI00478410; | ATP5C1  | 31.5 | 1.64E-90  | 0.098 | 7   | 7.1   | Q2 |
| IPI00554705; | DCTD    | 51.9 | 1.48E-90  | 0.099 | 6   | 10.2  | Q2 |
| IPI00293350; | TSNAX   | 33.4 | 2.93E-69  | 0.099 | 5   | 16.8  | Q2 |
| IPI00011654; | TUBB    | 73.4 | <1.0E-304 | 0.099 | 171 | 22.6  | Q2 |

|              |          |      |           |       |    |      |    |
|--------------|----------|------|-----------|-------|----|------|----|
| IPI00297084; | DDOST    | 28.7 | 1.40E-112 | 0.099 | 14 | 8.7  | Q2 |
| IPI00031615; | LLPH     | 29.5 | 2.13E-17  | 0.100 | 2  | 21.9 | Q2 |
| IPI00027175; | SRI      | 39.9 | 1.53E-42  | 0.101 | 12 | 17.4 | Q2 |
| IPI00014149  | TTC35    | 30.3 | 1.54E-143 | 0.101 | 5  | 33.8 | Q2 |
| IPI00000874; | PRDX1    | 79.9 | 7.07E-180 | 0.101 | 32 | 30.6 | Q2 |
| IPI00395887; | TMX1     | 22.5 | 4.23E-45  | 0.101 | 5  | 5.4  | Q2 |
| IPI00305978; | AKR7A2   | 18.4 | 3.51E-158 | 0.101 | 6  | 18.1 | Q2 |
| IPI00291928; | RAB14    | 64.2 | 1.46E-156 | 0.104 | 9  | 46.8 | Q2 |
| IPI00018783; | ITPA     | 32.5 | 9.41E-56  | 0.104 | 2  | 15.2 | Q2 |
| IPI00023006; | ACTC1    | 4.2  | 5.11E-170 | 0.105 | 13 | 30.6 | Q2 |
| IPI00003443; | IF16     | 20.3 | 5.27E-58  | 0.105 | 4  | 10.5 | Q2 |
| IPI00098902; | OGDH     | 25.1 | 8.02E-210 | 0.106 | 10 | 12.6 | Q2 |
| IPI00747764; | KPNA6    | 11.8 | 5.38E-32  | 0.106 | 3  | 11.7 | Q2 |
| IPI00894340; | 2-Sep    | 34.9 | 2.43E-192 | 0.106 | 12 | 15.7 | Q2 |
| IPI00922855; | TUBGCP2  | 4.9  | 4.86E-20  | 0.107 | 5  | 21.3 | Q2 |
| IPI00872209; | PPP3CA   | 18.6 | 1.44E-64  | 0.108 | 14 | 10.1 | Q2 |
| IPI00020984; | CANX     | 30.8 | 1.36E-211 | 0.108 | 18 | 13.0 | Q2 |
| IPI00028091; | ACTR3    | 56   | 9.02E-206 | 0.108 | 25 | 11.6 | Q2 |
| IPI00296053; | FH       | 28.2 | 4.88E-191 | 0.108 | 15 | 13.1 | Q2 |
| IPI00872773; | ERO1L    | 40   | 1.63E-212 | 0.109 | 19 | 27.3 | Q2 |
| IPI00017160; | VTA1     | 25.7 | 2.01E-14  | 0.109 | 6  | 29.5 | Q2 |
| IPI00645078; | UBA1     | 43.3 | <1.0E-304 | 0.110 | 35 | 8.7  | Q2 |
| IPI00008964; | RAB1B    | 25.4 | 3.50E-262 | 0.110 | 3  | 5.0  | Q2 |
| IPI00395939; | PITPNB   | 59   | 3.11E-122 | 0.111 | 18 | 9.1  | Q2 |
| IPI00027180  | ZMPSTE24 | 12.4 | 3.96E-63  | 0.112 | 3  | 11.6 | Q2 |
| IPI00419979; | PAK2     | 14.1 | 2.14E-41  | 0.112 | 3  | 3.6  | Q2 |
| IPI00909195; | HN1L     | 36.2 | 1.37E-111 | 0.112 | 9  | 10.7 | Q2 |
| IPI00552277; | UBL4A    | 28.3 | 1.44E-16  | 0.112 | 3  | 11.5 | Q2 |
| IPI00020567; | ARHGAP1  | 24.2 | 6.64E-37  | 0.112 | 8  | 16.3 | Q2 |
| IPI00010154; | GDI1     | 18.8 | 1.85E-284 | 0.112 | 7  | 15.5 | Q2 |
| IPI00015952; | EIF4G2   | 23.7 | 2.31E-141 | 0.112 | 12 | 40.0 | Q2 |
| IPI00000335  | HINT2    | 24.5 | 1.34E-54  | 0.112 | 3  | 14.9 | Q2 |
| IPI00304267; | NXN      | 17.5 | 2.35E-151 | 0.113 | 9  | 8.0  | Q2 |
| IPI00444945; | BAX      | 34.4 | 1.17E-161 | 0.114 | 6  | 12.6 | Q2 |
| IPI00872762; | SUCLG1   | 22   | 5.27E-63  | 0.114 | 4  | 12.4 | Q2 |

|              |          |      |           |       |     |      |    |
|--------------|----------|------|-----------|-------|-----|------|----|
| IPI00332371; | PFKL     | 11.8 | 1.09E-179 | 0.114 | 5   | 21.8 | Q2 |
| IPI00011919  | FADD     | 9.6  | 1.00E-02  | 0.115 | 4   | 6.8  | Q2 |
| IPI00003949; | UBE2N    | 57.9 | 1.49E-111 | 0.115 | 12  | 18.5 | Q2 |
| IPI00010207; | UFM1     | 35.3 | 5.65E-04  | 0.116 | 3   | 16.5 | Q2 |
| IPI00100980; | EHD2     | 15.1 | 4.14E-56  | 0.118 | 6   | 10.2 | Q2 |
| IPI00719725; | SAPS3    | 9.1  | 8.35E-27  | 0.119 | 2   | 35.0 | Q2 |
| IPI00010882; | DFFA     | 17.5 | 7.42E-15  | 0.119 | 4   | 9.9  | Q2 |
| IPI00465170; | NT5DC3   | 8.4  | 1.74E-14  | 0.119 | 4   | 14.2 | Q2 |
| IPI00411706; | ESD      | 41.8 | 1.06E-147 | 0.119 | 12  | 6.0  | Q2 |
| IPI00641582; | BAG3     | 17.2 | 2.80E-72  | 0.121 | 3   | 10.4 | Q2 |
| IPI00028635; | RPN2     | 20.2 | 2.37E-198 | 0.121 | 22  | 11.1 | Q2 |
| IPI00654605; | MAP7D1   | 20.2 | 6.31E-63  | 0.121 | 5   | 30.9 | Q2 |
| IPI00329692; | NMT1     | 20   | 8.01E-90  | 0.122 | 8   | 28.4 | Q2 |
| IPI00002460; | ANXA7    | 21.3 | 2.33E-81  | 0.122 | 14  | 61.2 | Q2 |
| IPI00413344; | CFL2     | 37.3 | 8.10E-127 | 0.122 | 4   | 21.3 | Q2 |
| IPI00019495; | DYNLT1   | 23   | 2.85E-29  | 0.123 | 2   | 1.2  | Q2 |
| IPI00413500; | COMMD4   | 17.6 | 9.38E-14  | 0.123 | 3   | 7.0  | Q2 |
| IPI00894409; | CPNE1    | 12   | 1.15E-06  | 0.123 | 2   | 36.2 | Q2 |
| IPI00299063  | STIM1    | 2.9  | 1.32E-05  | 0.124 | 2   | 0.6  | Q2 |
| IPI00029444; | C12orf10 | 11.7 | 3.17E-43  | 0.124 | 5   | 10.4 | Q2 |
| IPI00640525; | PPGB     | 9    | 3.48E-53  | 0.125 | 2   | 27.8 | Q2 |
| IPI00021808; | HARS     | 41.3 | 6.52E-146 | 0.125 | 20  | 12.9 | Q2 |
| IPI00337494; | SLC25A24 | 26.6 | 8.36E-69  | 0.125 | 16  | 16.8 | Q2 |
| IPI00023510; | RAB5A    | 24.2 | 1.45E-89  | 0.126 | 4   | 8.4  | Q2 |
| IPI00007611; | ATP5O    | 70   | 7.79E-273 | 0.126 | 13  | 15.6 | Q2 |
| IPI00022793; | HADHB    | 28.5 | 6.97E-86  | 0.127 | 13  | 11.1 | Q2 |
| IPI00180675; | TUBA1A   | 66.1 | <1.0E-304 | 0.127 | 128 | 31.9 | Q2 |
| IPI00018415; | TM9SF2   | 6.2  | 3.61E-56  | 0.128 | 3   | 8.6  | Q2 |
| IPI00005966  | NDUFA12  | 11.6 | 2.44E-03  | 0.128 | 4   | 27.4 | Q2 |
| IPI00023001; | FAM162A  | 24.7 | 4.95E-69  | 0.128 | 7   | 14.0 | Q2 |
| IPI00797738; | COX6B1   | 23.3 | 3.93E-08  | 0.129 | 11  | 6.7  | Q2 |
| IPI00013219; | ILK      | 19.5 | 1.13E-22  | 0.130 | 5   | 10.8 | Q2 |
| IPI00924787; | MYD88    | 7.9  | 1.31E-05  | 0.130 | 3   | 5.5  | Q2 |
| IPI00477355  | KIAA1279 | 4.5  | 8.59E-04  | 0.131 | 2   | 5.6  | Q2 |
| IPI00845319; | EPN3     | 2.6  | 9.80E-08  | 0.131 | 3   | 16.2 | Q2 |

|              |         |      |           |       |    |      |    |
|--------------|---------|------|-----------|-------|----|------|----|
| IPI00013466; | ASNA1   | 19.8 | 1.99E-68  | 0.131 | 8  | 12.9 | Q2 |
| IPI00793375; | XPNPEP1 | 12   | 4.96E-64  | 0.132 | 4  | 3.2  | Q2 |
| IPI00550523; | ATL3    | 22.7 | 7.30E-173 | 0.133 | 10 | 9.1  | Q2 |
| IPI00401264  | ERP44   | 30   | 1.25E-62  | 0.133 | 12 | 14.9 | Q2 |
| IPI00062120  | S100A16 | 54.4 | 5.24E-30  | 0.134 | 19 | 21.2 | Q2 |
| IPI00028031; | ACADVL  | 19.5 | 3.29E-90  | 0.134 | 8  | 21.5 | Q2 |
| IPI00166749; | PMPCA   | 15.4 | 2.49E-24  | 0.135 | 6  | 22.7 | Q2 |
| IPI00026904; | ADSL    | 11.8 | 7.09E-19  | 0.135 | 3  | 10.3 | Q2 |
| IPI00289499; | ATIC    | 52   | <1.0E-304 | 0.136 | 24 | 9.8  | Q2 |
| IPI00170972; | C9orf64 | 17   | 2.58E-14  | 0.136 | 6  | 23.2 | Q2 |
| IPI00412157; | PPME1   | 6.6  | 6.29E-15  | 0.137 | 2  | 16.7 | Q2 |
| IPI00020530  | ACOT13  | 15.7 | 2.43E-26  | 0.138 | 3  | 5.0  | Q2 |
| IPI00177008  | PGP     | 27.1 | 6.30E-42  | 0.138 | 4  | 14.7 | Q2 |
| IPI00215919; | ARF5    | 30   | 3.83E-127 | 0.138 | 5  | 15.7 | Q2 |
| IPI00002525  | NENF    | 26.2 | 2.55E-32  | 0.139 | 3  | 7.9  | Q2 |
| IPI00385267  | SRPR    | 15.5 | 9.86E-87  | 0.140 | 5  | 27.5 | Q2 |
| IPI00465179; | PFKM    | 12.6 | 2.17E-70  | 0.141 | 4  | 24.8 | Q2 |
| IPI00218343; | TUBA1C  | 12.2 | <1.0E-304 | 0.141 | 16 | 32.5 | Q2 |
| IPI00013890; | SFN     | 67.7 | 2.31E-284 | 0.141 | 25 | 45.3 | Q2 |
| IPI00024775; | RAB7L1  | 15.8 | 6.91E-33  | 0.141 | 2  | 44.5 | Q2 |
| IPI00297261; | PTPN1   | 35.9 | 4.86E-129 | 0.141 | 13 | 16.4 | Q2 |
| IPI00015842  | RCN1    | 14.5 | 7.33E-61  | 0.142 | 3  | 15.3 | Q2 |
| IPI00009822; | SRP54   | 26   | 1.46E-178 | 0.143 | 7  | 22.1 | Q2 |
| IPI00215888; | SRP72   | 22.7 | 1.91E-202 | 0.144 | 8  | 8.8  | Q2 |
| IPI00903226; | HK1     | 40.1 | <1.0E-304 | 0.145 | 29 | 12.6 | Q2 |
| IPI00005751  | SPTLC2  | 13   | 1.24E-38  | 0.145 | 5  | 18.2 | Q2 |
| IPI00749250; | ACTR2   | 44.1 | 1.31E-232 | 0.146 | 26 | 11.8 | Q2 |
| IPI00473047; | PRKAG1  | 22.9 | 3.50E-101 | 0.146 | 2  | 1.7  | Q2 |
| IPI00794956; | SCFD1   | 16.5 | 3.89E-91  | 0.147 | 5  | 20.2 | Q2 |
| IPI00179589; | MTPN    | 33.8 | 5.52E-71  | 0.147 | 7  | 34.0 | Q2 |
| IPI00011229; | CTSD    | 36.2 | <1.0E-304 | 0.147 | 16 | 63.8 | Q2 |
| IPI00914529; | RPL28   | 32.5 | 2.68E-27  | 0.148 | 24 | 32.2 | Q2 |
| IPI00816044; | C3orf10 | 46.3 | 2.72E-08  | 0.148 | 11 | 11.0 | Q2 |
| IPI00031522; | HADHA   | 32   | <1.0E-304 | 0.148 | 19 | 7.6  | Q2 |
| IPI00103467  | ALDH1B1 | 6.8  | 4.05E-31  | 0.148 | 2  | 31.9 | Q2 |

|              |          |      |           |       |    |      |    |
|--------------|----------|------|-----------|-------|----|------|----|
| IPI00642226; | COMMD6   | 16   | 1.88E-11  | 0.150 | 2  | 27.9 | Q2 |
| IPI00007102; | C17orf25 | 26.8 | 4.83E-151 | 0.151 | 13 | 6.3  | Q2 |
| IPI00019376; | SEPT11   | 15.3 | 1.97E-33  | 0.151 | 7  | 12.3 | Q2 |
| IPI00329633; | TARS     | 53.1 | <1.0E-304 | 0.152 | 32 | 8.5  | Q2 |
| IPI00873253; | SEC11A   | 17.1 | 9.45E-21  | 0.154 | 4  | 17.3 | Q2 |
| IPI00002134; | PSMD5    | 32.9 | 2.52E-185 | 0.154 | 13 | 11.3 | Q2 |
| IPI00792065; | TOR1AIP1 | 14.7 | 5.54E-95  | 0.157 | 9  | 13.5 | Q2 |
| IPI00020436; | RAB11B   | 60.6 | 4.17E-166 | 0.157 | 11 | 40.1 | Q2 |
| IPI00306195; | AKT1S1   | 7.2  | 2.25E-05  | 0.158 | 2  | 6.5  | Q2 |
| IPI00001883; | SNX9     | 11.6 | 3.55E-48  | 0.158 | 2  | 6.5  | Q2 |
| IPI00884896; | TXNRD1   | 21.7 | 1.29E-108 | 0.159 | 12 | 10.0 | Q2 |
| IPI00923582; | SCRN1    | 17.3 | 9.70E-52  | 0.160 | 7  | 11.4 | Q2 |
| IPI00304417; | IDH3B    | 10.7 | 1.81E-30  | 0.160 | 4  | 23.0 | Q2 |
| IPI00328846; | FAM83A   | 5.8  | 2.06E-14  | 0.160 | 2  | 21.4 | Q2 |
| IPI00828150; | SUGT1    | 29.3 | 1.67E-99  | 0.161 | 9  | 16.9 | Q2 |
| IPI00029737; | ACSL4    | 14.2 | 1.24E-75  | 0.162 | 2  | 2.3  | Q2 |
| IPI00300341; | TCEB1    | 48.2 | 3.42E-42  | 0.162 | 9  | 16.6 | Q2 |
| IPI00306516  | TIMM44   | 16.6 | 1.25E-83  | 0.162 | 8  | 39.8 | Q2 |
| IPI00008599; | EBP      | 16.5 | 7.53E-21  | 0.163 | 3  | 16.3 | Q2 |
| IPI00013860; | HIBADH   | 28.6 | 2.73E-128 | 0.163 | 7  | 10.6 | Q2 |
| IPI00411426; | VPS26A   | 37   | 4.93E-115 | 0.164 | 11 | 15.5 | Q2 |
| IPI00465315; | CYCS     | 39   | 2.49E-47  | 0.164 | 17 | 10.3 | Q2 |
| IPI00913912; | ATXN10   | 12.2 | 1.93E-21  | 0.165 | 7  | 12.2 | Q2 |
| IPI00215719; | RPL18    | 45.7 | 2.43E-86  | 0.165 | 26 | 27.6 | Q2 |
| IPI00033025; | SEPT7    | 26.3 | 1.41E-196 | 0.166 | 14 | 15.6 | Q2 |
| IPI00375676; | FTL      | 19.9 | 2.54E-37  | 0.167 | 4  | 3.2  | Q2 |
| IPI00007935; | PDLIM5   | 16.3 | 3.19E-30  | 0.167 | 5  | 28.8 | Q2 |
| IPI00009253; | NAPA     | 43.1 | 8.73E-137 | 0.168 | 9  | 26.5 | Q2 |
| IPI00298547  | PARK7    | 75.7 | 1.20E-210 | 0.168 | 13 | 8.7  | Q2 |
| IPI00335001; | HYPK     | 20.6 | 2.56E-06  | 0.170 | 3  | 12.2 | Q2 |
| IPI00023591; | PURA     | 13.7 | 4.17E-07  | 0.170 | 5  | 14.7 | Q2 |
| IPI00105620; | RRAGA    | 16.3 | 3.44E-26  | 0.170 | 3  | 8.7  | Q2 |
| IPI00218019; | BSG      | 16.9 | 2.75E-62  | 0.170 | 6  | 15.0 | Q2 |
| IPI00002412; | PPT1     | 7.8  | 5.99E-14  | 0.171 | 3  | 12.3 | Q2 |
| IPI00017592  | LETM1    | 16.1 | 4.40E-88  | 0.171 | 10 | 9.3  | Q2 |



|              |          |      |           |       |    |      |    |
|--------------|----------|------|-----------|-------|----|------|----|
| IPI00023640; | PDCD5    | 67.2 | 1.61E-62  | 0.171 | 15 | 19.1 | Q2 |
| IPI00219675; | RAC1     | 48.3 | 1.04E-154 | 0.172 | 16 | 33.3 | Q2 |
| IPI00166785; | MMGT1    | 7.7  | 3.30E-03  | 0.172 | 2  | 14.5 | Q2 |
| IPI00412987; | GMFB     | 34.4 | 5.58E-73  | 0.172 | 6  | 4.5  | Q2 |
| IPI00554761; | HMGN1    | 30   | 1.61E-43  | 0.173 | 2  | 6.8  | Q2 |
| IPI00554777; | ASNS     | 7.7  | 2.31E-173 | 0.173 | 2  | 28.0 | Q2 |
| IPI00028392; | SARG     | 18.1 | 1.77E-35  | 0.174 | 4  | 19.4 | Q2 |
| IPI00008982; | ALDH18A1 | 18.1 | 3.27E-82  | 0.174 | 9  | 25.3 | Q2 |
| IPI00443909; | CNPY2    | 31.3 | 7.66E-67  | 0.175 | 6  | 10.8 | Q2 |
| IPI00004988  | MANBAL   | 14.1 | 2.23E-02  | 0.176 | 2  | 45.4 | Q2 |
| IPI00018600; | OPA3     | 12.3 | 8.52E-04  | 0.177 | 4  | 21.7 | Q2 |
| IPI00291064; | ZFAND1   | 9    | 3.57E-10  | 0.178 | 2  | 8.5  | Q2 |
| IPI00218924; | CHP      | 47.2 | 4.66E-141 | 0.178 | 2  | 18.2 | Q2 |
| IPI00009407  | DAD1     | 35.4 | 1.82E-29  | 0.178 | 8  | 12.6 | Q2 |
| IPI00003479; | MAPK1    | 40.6 | 3.08E-51  | 0.179 | 14 | 12.8 | Q2 |
| IPI00218782; | CAPZB    | 46.3 | 6.55E-208 | 0.180 | 24 | 13.9 | Q2 |
| IPI00216088; | CRABP2   | 35.5 | 2.38E-26  | 0.180 | 6  | 14.6 | Q2 |
| IPI00030877; | SEPT15   | 12.7 | 1.46E-15  | 0.180 | 2  | 4.2  | Q2 |
| IPI00013895; | S100A11  | 56.2 | 2.65E-109 | 0.180 | 20 | 29.8 | Q2 |
| IPI00412243  | KIAA1609 | 15.8 | 2.44E-65  | 0.181 | 4  | 29.3 | Q2 |
| IPI00005160; | ARPC1B   | 43.3 | 1.02E-103 | 0.181 | 16 | 14.7 | Q2 |
| IPI00883896; | LIMA1    | 41.6 | 1.65E-302 | 0.181 | 38 | 36.9 | Q2 |
| IPI00025277  | PDCD6    | 44   | 5.53E-47  | 0.184 | 8  | 12.4 | Q2 |
| IPI00220373; | IDE      | 11.7 | 2.89E-57  | 0.184 | 6  | 10.4 | Q2 |
| IPI00002824; | CSRP2    | 36.8 | 7.05E-44  | 0.185 | 5  | 16.4 | Q2 |
| IPI00002552; | AP1M2    | 8.7  | 1.80E-11  | 0.185 | 4  | 13.7 | Q2 |
| IPI00004488  | ATP6V1F  | 15.1 | 6.33E-05  | 0.186 | 4  | 3.5  | Q2 |
| IPI00884105; | LAMP1    | 12.2 | 2.43E-59  | 0.186 | 6  | 11.8 | Q2 |
| IPI00027009; | PACSIN2  | 10.7 | 3.46E-20  | 0.187 | 2  | 9.8  | Q2 |
| IPI00290043; | ITGA3    | 11   | 3.18E-90  | 0.187 | 4  | 43.2 | Q2 |
| IPI00844000  | KIAA0776 | 13.1 | 5.98E-57  | 0.187 | 3  | 7.2  | Q2 |
| IPI00472939; | SPCS2    | 49.8 | 5.22E-188 | 0.187 | 8  | 9.1  | Q2 |
| IPI00328748; | ARMET    | 32.1 | 8.45E-94  | 0.187 | 14 | 11.8 | Q2 |
| IPI00015944; | EML2     | 6.6  | 3.03E-29  | 0.188 | 4  | 8.7  | Q2 |
| IPI00910701; | AARS     | 38.7 | <1.0E-304 | 0.189 | 21 | 11.9 | Q2 |

|              |          |      |           |       |     |      |    |
|--------------|----------|------|-----------|-------|-----|------|----|
| IPI00007691; | TRAPPC4  | 40.2 | 2.65E-46  | 0.189 | 3   | 6.8  | Q2 |
| IPI00216694; | PLS3     | 55.7 | <1.0E-304 | 0.190 | 43  | 16.3 | Q2 |
| IPI00024097; | TES      | 30.4 | 1.27E-88  | 0.191 | 15  | 27.7 | Q2 |
| IPI00216965; | GOSR2    | 13.1 | 4.53E-09  | 0.193 | 3   | 16.8 | Q2 |
| IPI00007058; | CORO1B   | 16.4 | 8.93E-42  | 0.193 | 8   | 13.8 | Q2 |
| IPI00010427  | TMEM93   | 26.4 | 1.34E-11  | 0.194 | 2   | 47.6 | Q2 |
| IPI00029656; | DFNA5    | 20   | 5.14E-95  | 0.195 | 9   | 16.4 | Q2 |
| IPI00003004; | SLC25A22 | 11.5 | 9.56E-13  | 0.195 | 3   | 10.6 | Q2 |
| IPI00329331; | UGP2     | 28.5 | 1.23E-206 | 0.195 | 17  | 13.0 | Q2 |
| IPI00029002; | SFT2D2   | 6.9  | 4.40E-05  | 0.196 | 2   | 36.9 | Q2 |
| IPI00005657; | PFDN6    | 53.5 | 1.77E-44  | 0.196 | 9   | 13.7 | Q2 |
| IPI00024920  | ATP5D    | 26.2 | 2.65E-56  | 0.198 | 8   | 16.4 | Q2 |
| IPI00847322; | SOD2     | 27   | 3.27E-17  | 0.198 | 5   | 7.4  | Q2 |
| IPI00235412; | DNM1L    | 39.3 | <1.0E-304 | 0.199 | 22  | 13.1 | Q2 |
| IPI00735181; | UNC45A   | 22.6 | 7.21E-181 | 0.199 | 4   | 20.6 | Q2 |
| IPI00009268; | ACY1     | 9.6  | 9.28E-16  | 0.199 | 2   | 21.0 | Q2 |
| IPI00419869; | COX15    | 5.6  | 1.24E-21  | 0.200 | 2   | 14.9 | Q2 |
| IPI00376005; | EIF5A    | 60.9 | 4.05E-198 | 0.200 | 25  | 46.9 | Q2 |
| IPI00011770; | NDUFA4   | 32.1 | 2.74E-09  | 0.200 | 4   | 31.9 | Q2 |
| IPI00307200; | SWAP70   | 9.7  | 1.04E-07  | 0.200 | 6   | 9.8  | Q2 |
| IPI00219446; | PEBP1    | 79.7 | 2.97E-304 | 0.201 | 9   | 8.1  | Q2 |
| IPI00031169; | RAB2A    | 67   | 1.39E-184 | 0.201 | 15  | 26.6 | Q2 |
| IPI00011253; | RPS3     | 80.7 | 3.82E-225 | 0.203 | 16  | 35.9 | Q2 |
| IPI00007812; | ATP6V1B2 | 25   | 1.46E-122 | 0.203 | 8   | 14.4 | Q2 |
| IPI00903105; | CIAPIN1  | 22.1 | 1.15E-47  | 0.204 | 7   | 4.6  | Q2 |
| IPI00177509  | TRAPPC5  | 23.9 | 2.05E-09  | 0.205 | 5   | 2.1  | Q2 |
| IPI00026111; | TMCO1    | 24.5 | 3.47E-51  | 0.206 | 3   | 24.7 | Q2 |
| IPI00301021; | SSR1     | 11.9 | 2.75E-41  | 0.206 | 3   | 3.8  | Q2 |
| IPI00384444; | KRT14    | 81.6 | <1.0E-304 | 0.206 | 493 | 84.0 | Q2 |
| IPI00008289; | BRCC3    | 8.2  | 1.46E-11  | 0.208 | 2   | 10.2 | Q2 |
| IPI00011996; | UBE2Z    | 7.6  | 1.44E-03  | 0.208 | 2   | 6.1  | Q2 |
| IPI00549434; | 8-Sep    | 6.4  | 7.21E-10  | 0.208 | 2   | 25.2 | Q2 |
| IPI00304754; | FERMT1   | 25.7 | 2.15E-118 | 0.208 | 11  | 78.2 | Q2 |
| IPI00301364; | SKP1     | 44.2 | 4.25E-65  | 0.209 | 5   | 8.3  | Q2 |
| IPI00384489  | AP1B1    | 13.7 | 2.12E-198 | 0.209 | 6   | 12.2 | Q2 |

|               |                   |      |           |       |    |      |    |
|---------------|-------------------|------|-----------|-------|----|------|----|
| IPI00003515   | TRIP11            | 1.8  | 2.22E-08  | 0.209 | 2  | 20.6 | Q2 |
| IPI00017376;I | SEC23B            | 13.8 | 6.08E-105 | 0.210 | 8  | 18.3 | Q2 |
| IPI00790743;I | RPL36AL           | 7.2  | 2.51E-22  | 0.210 | 5  | 14.7 | Q2 |
| IPI00026665;I | QARS              | 43.8 | 5.04E-217 | 0.210 | 13 | 9.9  | Q2 |
| IPI00784044;I | MCCC2             | 4.1  | 1.62E-15  | 0.210 | 2  | 3.5  | Q2 |
| IPI00216237;I | RPL36             | 37.1 | 4.63E-24  | 0.210 | 16 | 13.4 | Q2 |
| IPI00550032;I | RP11-511D14.1-001 | 53.4 | 2.54E-80  | 0.212 | 18 | 31.4 | Q2 |
| IPI00018931   | VPS35             | 29.9 | 9.49E-261 | 0.213 | 20 | 17.5 | Q2 |
| IPI00004436;I | LSM1              | 21.8 | 4.80E-27  | 0.213 | 2  | 14.3 | Q2 |
| IPI00024013;I | UBE2D3            | 12.2 | 7.61E-10  | 0.213 | 6  | 10.3 | Q2 |
| IPI00329036;I | MRPL50            | 15.2 | 1.88E-09  | 0.215 | 2  | 9.0  | Q2 |
| IPI00000690;I | AIFM1             | 17.3 | 5.09E-29  | 0.216 | 4  | 7.3  | Q2 |
| IPI00465431   | LGALS3            | 33.6 | 2.92E-74  | 0.216 | 5  | 24.6 | Q2 |
| IPI00514501;I | C1orf57           | 33.8 | 8.34E-48  | 0.218 | 4  | 20.1 | Q2 |
| IPI00020319;I | BLOC1S1           | 19.6 | 4.83E-17  | 0.219 | 4  | 19.2 | Q2 |
| IPI00216260;I | TSFM              | 34.4 | 2.00E-94  | 0.219 | 6  | 19.4 | Q2 |
| IPI00007144;I | RPL26L1           | 11.7 | 1.53E-18  | 0.220 | 3  | 3.6  | Q2 |
| IPI00853598;I | SEC13             | 23.1 | 7.10E-138 | 0.221 | 7  | 18.9 | Q2 |
| IPI00216298;I | TXN               | 48.6 | 8.53E-43  | 0.221 | 12 | 18.9 | Q2 |
| IPI00411356   | VPS4A             | 9.8  | 9.69E-17  | 0.221 | 3  | 5.2  | Q2 |
| IPI00015891   | PFDN4             | 32.8 | 5.43E-41  | 0.221 | 3  | 15.6 | Q2 |
| IPI00923606;I | EPRS              | 29   | <1.0E-304 | 0.223 | 3  | 18.8 | Q2 |
| IPI00604590;I | NME1-NME2         | 71.9 | 3.14E-195 | 0.223 | 39 | 20.6 | Q2 |
| IPI00060031   | ARL8A             | 16.7 | 2.12E-62  | 0.225 | 3  | 0.9  | Q2 |
| IPI00005692   | MRPS12            | 12.3 | 2.58E-03  | 0.225 | 2  | 2.6  | Q2 |
| IPI00020513;I | ZYX               | 13.3 | 2.46E-55  | 0.226 | 5  | 15.0 | Q2 |
| IPI00020191;I | PTP4A2            | 18.6 | 5.44E-09  | 0.227 | 5  | 22.4 | Q2 |
| IPI00289082;I | PTPN12            | 5.4  | 5.76E-30  | 0.228 | 2  | 16.9 | Q2 |
| IPI00221234;I | ALDH7A1           | 32.3 | 1.10E-214 | 0.228 | 11 | 16.9 | Q2 |
| IPI00647915;I | TAGLN2            | 71.8 | 4.77E-269 | 0.229 | 49 | 20.6 | Q2 |
| IPI00012011;I | CFL1              | 89.2 | <1.0E-304 | 0.230 | 50 | 21.7 | Q2 |
| IPI00465211;I | WDR92             | 4.4  | 1.83E-27  | 0.230 | 2  | 2.3  | Q2 |
| IPI00017342   | RHOG              | 45   | 5.19E-155 | 0.231 | 8  | 29.1 | Q2 |
| IPI00910977;I | MPST              | 36   | 1.51E-144 | 0.231 | 10 | 10.5 | Q2 |
| IPI00018434;I | TSG101            | 18.2 | 9.04E-32  | 0.231 | 8  | 13.6 | Q2 |

|              |          |      |           |       |    |      |    |
|--------------|----------|------|-----------|-------|----|------|----|
| IPI00005050  | MRPS14   | 28.9 | 1.19E-35  | 0.231 | 4  | 27.3 | Q2 |
| IPI00219774; | PRKAR2A  | 21.5 | 1.64E-80  | 0.231 | 4  | 8.4  | Q2 |
| IPI00019770; | FAU      | 9    | 6.49E-11  | 0.232 | 9  | 28.7 | Q2 |
| IPI00295851  | COPB1    | 41.9 | <1.0E-304 | 0.233 | 26 | 10.7 | Q2 |
| IPI00018195; | MAPK3    | 6.6  | 2.86E-14  | 0.234 | 3  | 14.7 | Q2 |
| IPI00000792; | CRYZ     | 42.6 | 9.84E-41  | 0.234 | 8  | 9.6  | Q2 |
| IPI00219910; | BLVRB    | 38.2 | 1.87E-75  | 0.235 | 7  | 6.9  | Q2 |
| IPI00023647; | UBA6     | 29.4 | 4.55E-278 | 0.235 | 25 | 26.4 | Q2 |
| IPI00217952; | GFPT1    | 19.2 | 2.06E-118 | 0.236 | 7  | 17.4 | Q2 |
| IPI00003326; | ARL2     | 23.9 | 6.90E-33  | 0.236 | 3  | 0.8  | Q2 |
| IPI00025252; | PDIA3    | 61.2 | <1.0E-304 | 0.237 | 47 | 19.6 | Q2 |
| IPI00219861; | ACP1     | 38.6 | 3.71E-91  | 0.237 | 5  | 5.8  | Q2 |
| IPI00024551; | C15orf24 | 19.4 | 1.65E-06  | 0.237 | 4  | 6.1  | Q2 |
| IPI00019899; | SC4MOL   | 11.3 | 5.52E-44  | 0.238 | 4  | 4.4  | Q2 |
| IPI00027438; | FLOT1    | 6.1  | 6.65E-19  | 0.239 | 2  | 21.9 | Q2 |
| IPI00019869; | S100A2   | 54.1 | 9.02E-141 | 0.239 | 44 | 23.8 | Q2 |
| IPI00169383; | PGK1     | 76.3 | <1.0E-304 | 0.239 | 57 | 8.7  | Q2 |
| IPI00444937; | TRAPPC2L | 13.6 | 1.07E-06  | 0.239 | 2  | 7.7  | Q2 |
| IPI00301561; | TRIP6    | 6.3  | 3.73E-04  | 0.240 | 2  | 43.1 | Q2 |
| IPI00220827  | TMSB10   | 50   | 2.60E-20  | 0.241 | 5  | 20.2 | Q2 |
| IPI00246975; | GSTM3    | 16.9 | 2.15E-29  | 0.241 | 3  | 33.1 | Q2 |
| IPI00856049  | RPL22L1  | 19.7 | 1.15E-09  | 0.241 | 2  | 6.8  | Q2 |
| IPI00299086; | SDCBP    | 26.8 | 1.43E-126 | 0.242 | 10 | 7.6  | Q2 |
| IPI00219077; | LTA4H    | 44.7 | <1.0E-304 | 0.242 | 17 | 11.4 | Q2 |
| IPI00024664; | USP5     | 20.2 | 2.43E-105 | 0.242 | 8  | 10.9 | Q2 |
| IPI00023542; | TMED9    | 20   | 2.50E-86  | 0.244 | 5  | 2.8  | Q2 |
| IPI00019169; | SH3GL1   | 22.6 | 6.39E-94  | 0.244 | 7  | 18.6 | Q2 |
| IPI00449197; | GMPR2    | 14.9 | 5.73E-11  | 0.245 | 2  | 0.5  | Q2 |
| IPI00027350; | PRDX2    | 35.4 | 1.39E-144 | 0.245 | 13 | 82.3 | Q2 |
| IPI00011285; | CAPN1    | 33.9 | 5.06E-140 | 0.246 | 24 | 12.6 | Q2 |
| IPI00409635; | FAM62B   | 11.4 | 6.49E-87  | 0.247 | 2  | 0.2  | Q2 |
| IPI00916111; | MDH1     | 44.9 | 3.22E-234 | 0.247 | 13 | 11.5 | Q2 |
| IPI00031708; | FAH      | 5.5  | 1.18E-11  | 0.248 | 2  | 5.1  | Q2 |
| IPI00015972; | COX6C    | 42.7 | 3.22E-06  | 0.248 | 8  | 14.7 | Q2 |
| IPI00397947; | UBE2V1   | 22.7 | 1.12E-34  | 0.248 | 17 | 11.7 | Q2 |

|              |                |      |           |       |    |      |    |
|--------------|----------------|------|-----------|-------|----|------|----|
| IPI00032409; | ROBLD3         | 40   | 1.15E-34  | 0.248 | 5  | 13.0 | Q2 |
| IPI00218268; | OPRS1          | 12.1 | 4.37E-04  | 0.250 | 4  | 8.6  | Q2 |
| IPI00027851; | HEXA           | 7.2  | 3.98E-10  | 0.250 | 3  | 29.8 | Q2 |
| IPI00008475; | HMGCS1         | 44.2 | <1.0E-304 | 0.251 | 28 | 11.3 | Q2 |
| IPI00911046; | MST4           | 6.2  | 2.44E-103 | 0.253 | 2  | 3.0  | Q2 |
| IPI00019407; | NSDHL          | 22.8 | 1.38E-38  | 0.253 | 8  | 26.4 | Q2 |
| IPI00873875; | SH3KBP1        | 3.4  | 2.17E-22  | 0.255 | 2  | 7.6  | Q2 |
| IPI00009737; | RRAGD          | 6.5  | 2.64E-09  | 0.256 | 3  | 23.6 | Q2 |
| IPI00604777; | DPP9           | 12.1 | 3.56E-86  | 0.257 | 4  | 16.0 | Q2 |
| IPI00024670; | REEP5          | 20.6 | 3.82E-36  | 0.257 | 9  | 47.1 | Q2 |
| IPI00004838; | CRK            | 40.8 | 9.05E-114 | 0.257 | 12 | 7.5  | Q2 |
| IPI00657953; | TRIO           | 1.9  | 1.00E-36  | 0.257 | 2  | 1.6  | Q2 |
| IPI00219018; | GAPDH          | 74.6 | <1.0E-304 | 0.257 | 84 | 36.1 | Q2 |
| IPI00513827; | DKFZp686M24262 | 11.9 | 7.59E-08  | 0.257 | 4  | 3.4  | Q2 |
| IPI00219365; | MSN            | 62   | <1.0E-304 | 0.258 | 51 | 21.1 | Q2 |
| IPI00031023; | FLII           | 24.5 | 3.71E-238 | 0.259 | 4  | 20.5 | Q2 |
| IPI00028055; | TMED10         | 32   | 6.27E-115 | 0.259 | 8  | 21.9 | Q2 |
| IPI00783097; | GARS           | 30.7 | <1.0E-304 | 0.259 | 22 | 14.8 | Q2 |
| IPI00010706; | GSS            | 24.5 | 1.23E-47  | 0.259 | 11 | 21.9 | Q2 |
| IPI00643920; | TKT            | 49.6 | <1.0E-304 | 0.259 | 47 | 13.5 | Q2 |
| IPI00009634; | SQRDL          | 48.9 | 4.28E-179 | 0.259 | 24 | 11.2 | Q2 |
| IPI00480056; | RAB4A          | 37.2 | 1.70E-67  | 0.260 | 6  | 3.5  | Q2 |
| IPI00013808; | ACTN4          | 74   | <1.0E-304 | 0.260 | 90 | 14.7 | Q2 |
| IPI00217563; | ITGB1          | 26.8 | 9.83E-119 | 0.261 | 13 | 41.2 | Q2 |
| IPI00060181; | EFHD2          | 49.6 | 7.44E-138 | 0.262 | 9  | 44.0 | Q2 |
| IPI00010346; | NLN            | 9.7  | 9.76E-29  | 0.262 | 2  | 17.3 | Q2 |
| IPI00455153; | NFU1           | 26   | 2.06E-27  | 0.262 | 5  | 13.3 | Q2 |
| IPI00644969; | KAT            | 26.3 | 4.36E-09  | 0.264 | 3  | 4.1  | Q2 |
| IPI00220648  | PMVK           | 40.1 | 4.71E-51  | 0.264 | 4  | 8.2  | Q2 |
| IPI00430803  | C2orf79        | 15.7 | 1.00E-06  | 0.265 | 4  | 13.5 | Q2 |
| IPI00031109  | NDUFAF2        | 52.7 | 9.41E-69  | 0.265 | 6  | 16.5 | Q2 |
| IPI00396630; | PRKACA         | 14   | 7.72E-54  | 0.266 | 3  | 7.7  | Q2 |
| IPI00289876; | STX7           | 29.5 | 6.09E-81  | 0.267 | 5  | 6.1  | Q2 |
| IPI00643591; | AP1G1          | 16.6 | 2.08E-70  | 0.268 | 9  | 22.3 | Q2 |
| IPI00220219; | COPB2          | 34.3 | 7.53E-275 | 0.268 | 16 | 10.5 | Q2 |

|              |          |      |           |       |    |      |    |
|--------------|----------|------|-----------|-------|----|------|----|
| IPI00299402; | PC       | 25   | 1.44E-274 | 0.268 | 5  | 11.3 | Q2 |
| IPI00023530; | CDK5     | 13   | 2.35E-05  | 0.268 | 4  | 11.6 | Q2 |
| IPI00909772; | AP2M1    | 19.8 | 8.80E-32  | 0.269 | 10 | 16.7 | Q2 |
| IPI00746777; | ADH5     | 35.6 | 4.96E-212 | 0.270 | 20 | 18.0 | Q2 |
| IPI00514619; | C2orf4   | 35.7 | 1.25E-104 | 0.271 | 9  | 7.2  | Q2 |
| IPI00871870; | ARPC3    | 46.1 | 5.45E-81  | 0.271 | 11 | 6.9  | Q2 |
| IPI00871890; | PICALM   | 14.8 | 4.56E-154 | 0.271 | 7  | 16.2 | Q2 |
| IPI00550234; | ARPC5    | 43.7 | 7.00E-36  | 0.272 | 7  | 7.0  | Q2 |
| IPI00024705; | GIPC1    | 37.8 | 1.78E-132 | 0.272 | 10 | 14.7 | Q2 |
| IPI00893197; | PPP2R4   | 17.7 | 8.32E-48  | 0.272 | 5  | 16.7 | Q2 |
| IPI00023939  | RABIF    | 16.3 | 3.78E-07  | 0.273 | 2  | 4.7  | Q2 |
| IPI00003968; | NDUFA9   | 16.2 | 4.55E-31  | 0.273 | 6  | 17.0 | Q2 |
| IPI00154451; | MMS19    | 19.6 | 1.65E-174 | 0.273 | 5  | 13.1 | Q2 |
| IPI00005161; | ARPC2    | 47   | 7.02E-99  | 0.275 | 22 | 24.3 | Q2 |
| IPI00872103; | ASL      | 8.5  | 2.05E-13  | 0.275 | 4  | 24.5 | Q2 |
| IPI00418262; | ALDOC    | 14.4 | 1.02E-276 | 0.276 | 8  | 9.4  | Q2 |
| IPI00021785  | COX5B    | 18.6 | 4.35E-18  | 0.277 | 8  | 14.7 | Q2 |
| IPI00922240  | ACTB     | 9.8  | <1.0E-304 | 0.277 | 11 | 15.9 | Q2 |
| IPI00386516; | KIAA0174 | 11.3 | 2.46E-05  | 0.278 | 4  | 9.2  | Q2 |
| IPI00298520; | ARCN1    | 27.9 | 1.44E-89  | 0.278 | 20 | 20.3 | Q2 |
| IPI00414554  | ARPC5L   | 34.6 | 2.85E-45  | 0.279 | 7  | 4.6  | Q2 |
| IPI00021338; | DLAT     | 15   | 3.14E-54  | 0.279 | 5  | 14.9 | Q2 |
| IPI00218466; | SEC61A1  | 8.3  | 1.52E-09  | 0.279 | 5  | 10.8 | Q2 |
| IPI00328170; | MOGS     | 17.4 | 1.36E-81  | 0.280 | 8  | 10.7 | Q2 |
| IPI00023987; | PPCS     | 22.5 | 1.71E-18  | 0.280 | 7  | 32.3 | Q2 |
| IPI00009302  | PLEK2    | 7.1  | 4.63E-04  | 0.281 | 3  | 29.4 | Q2 |
| IPI00640817; | AK1      | 37.6 | 1.62E-70  | 0.281 | 12 | 26.3 | Q2 |
| IPI00005969; | CAPZA1   | 66.4 | 3.69E-200 | 0.284 | 13 | 15.5 | Q2 |
| IPI00000581; | OTUB1    | 47.4 | 1.17E-194 | 0.285 | 13 | 8.5  | Q2 |
| IPI00893918; | VARS     | 33.8 | <1.0E-304 | 0.286 | 3  | 17.6 | Q2 |
| IPI00010896; | CLIC1    | 79.3 | <1.0E-304 | 0.286 | 7  | 20.3 | Q2 |
| IPI00784366; | AP2B1    | 34.8 | 1.51E-300 | 0.286 | 25 | 8.8  | Q2 |
| IPI00655754; | UFD1L    | 18.4 | 2.22E-87  | 0.288 | 4  | 16.9 | Q2 |
| IPI00020599; | CALR     | 52.5 | 3.01E-268 | 0.288 | 38 | 13.2 | Q2 |
| IPI00007814; | ATP6V1C1 | 15.2 | 6.17E-29  | 0.289 | 7  | 10.3 | Q2 |

|              |         |      |           |       |    |       |    |
|--------------|---------|------|-----------|-------|----|-------|----|
| IPI00419249; | PSMA3   | 41.6 | 7.05E-90  | 0.290 | 3  | 38.9  | Q2 |
| IPI00480022; | GOLGA7  | 38.7 | 2.70E-30  | 0.290 | 3  | 5.3   | Q2 |
| IPI00925052; | ARPC4   | 31.6 | 3.52E-30  | 0.291 | 20 | 51.0  | Q2 |
| IPI00289758; | CAPN2   | 35.3 | 4.69E-300 | 0.292 | 27 | 10.7  | Q2 |
| IPI00382452; | CHMP1A  | 26.5 | 2.67E-09  | 0.292 | 4  | 16.9  | Q2 |
| IPI00328415; | CYB5R3  | 45.5 | 6.12E-226 | 0.293 | 13 | 12.5  | Q2 |
| IPI00014398; | FHL1    | 35   | 6.78E-84  | 0.293 | 11 | 16.3  | Q2 |
| IPI00026182; | CAPZA2  | 31.5 | 1.31E-73  | 0.293 | 7  | 6.8   | Q2 |
| IPI00000877; | HYOU1   | 34.8 | <1.0E-304 | 0.294 | 16 | 14.7  | Q2 |
| IPI00479877; | ALDH9A1 | 23.6 | 6.05E-121 | 0.295 | 9  | 7.8   | Q2 |
| IPI00026964; | UQCRFS1 | 24.5 | 5.58E-30  | 0.297 | 7  | 16.9  | Q2 |
| IPI00257882; | PEPD    | 9.1  | 1.04E-40  | 0.298 | 3  | 5.7   | Q2 |
| IPI00218693; | APRT    | 62.8 | 1.04E-55  | 0.298 | 11 | 63.7  | Q2 |
| IPI00007682  | ATP6V1A | 32.3 | 3.58E-176 | 0.299 | 11 | 22.8  | Q2 |
| IPI00003348; | GNB2    | 27.9 | 1.63E-164 | 0.300 | 15 | 18.3  | Q2 |
| IPI00639982; | DYNLT3  | 10.5 | 6.99E-14  | 0.300 | 3  | 5.9   | Q2 |
| IPI00760715; | CAST    | 48.1 | <1.0E-304 | 0.301 | 8  | 10.3  | Q2 |
| IPI00872214; | TBCA    | 49.3 | 2.40E-65  | 0.301 | 16 | 12.0  | Q2 |
| IPI00011284; | COMT    | 28.4 | 2.13E-162 | 0.301 | 3  | 8.0   | Q2 |
| IPI00021258; | ARFIP1  | 15.3 | 5.39E-22  | 0.302 | 4  | 19.4  | Q2 |
| IPI00290279; | ADK     | 29.8 | 1.41E-95  | 0.302 | 9  | 10.6  | Q2 |
| IPI00005578  | EHD4    | 29.4 | 9.82E-159 | 0.303 | 12 | 9.7   | Q2 |
| IPI00024129; | PPIC    | 16   | 1.61E-28  | 0.304 | 4  | 5.2   | Q2 |
| IPI00010248; | SPG21   | 11   | 1.92E-07  | 0.304 | 2  | 10.0  | Q2 |
| IPI00856098; | RRBP1   | 38.1 | <1.0E-304 | 0.304 | 5  | 69.1  | Q2 |
| IPI00219452; | ACOT7   | 43.5 | 3.05E-204 | 0.305 | 21 | 25.1  | Q2 |
| IPI00410214; | BPNT1   | 37.7 | 9.04E-237 | 0.305 | 12 | 19.9  | Q2 |
| IPI00646304; | PPIB    | 58.8 | 7.04E-175 | 0.306 | 23 | 15.1  | Q2 |
| IPI00914016; | DCTN4   | 7.1  | 4.83E-09  | 0.306 | 3  | 114.4 | Q2 |
| IPI00411559; | SMC4    | 21.8 | 7.67E-138 | 0.308 | 2  | 6.7   | Q2 |
| IPI00063827; | ABHD14B | 44.3 | 3.06E-76  | 0.309 | 5  | 5.3   | Q2 |
| IPI00470610; | PYCR2   | 34.1 | 1.05E-73  | 0.310 | 6  | 16.9  | Q2 |
| IPI00654744; | SYNGR2  | 13.8 | 1.66E-11  | 0.310 | 3  | 43.3  | Q2 |
| IPI00221232; | GNG12   | 76.4 | 1.36E-51  | 0.312 | 12 | 21.5  | Q2 |
| IPI00177728; | CNDP2   | 52.2 | <1.0E-304 | 0.312 | 23 | 15.9  | Q2 |

|              |              |      |           |       |    |      |    |
|--------------|--------------|------|-----------|-------|----|------|----|
| IPI00872862; | C1orf151     | 9    | 3.51E-03  | 0.313 | 2  | 13.2 | Q2 |
| IPI00784614; | Ov/Br septin | 33.4 | 5.81E-240 | 0.314 | 16 | 22.6 | Q2 |
| IPI00411705; | CLLD6        | 18.4 | 1.27E-09  | 0.314 | 3  | 16.6 | Q2 |
| IPI00022334  | OAT          | 42.6 | 4.55E-216 | 0.315 | 22 | 19.9 | Q2 |
| IPI00411680; | PCMT1        | 52.6 | 4.68E-220 | 0.315 | 6  | 10.9 | Q2 |
| IPI00513761; | RP3          | 28.2 | 1.06E-108 | 0.315 | 5  | 16.3 | Q2 |
| IPI00009946; | TOMM34       | 31.1 | 1.80E-86  | 0.316 | 9  | 7.3  | Q2 |
| IPI00000051  | PFDN1        | 37.7 | 4.06E-19  | 0.316 | 9  | 10.3 | Q2 |
| IPI00739827; | LAMP2        | 9    | 3.25E-08  | 0.316 | 2  | 7.8  | Q2 |
| IPI00004669; | GALNT2       | 8.1  | 4.57E-25  | 0.316 | 4  | 8.2  | Q2 |
| IPI00169400; | MRPS5        | 10   | 1.96E-17  | 0.317 | 2  | 39.3 | Q2 |
| IPI00013004; | PDXK         | 22.1 | 2.13E-88  | 0.318 | 6  | 22.0 | Q2 |
| IPI00926648; | APEH         | 13.4 | 3.97E-69  | 0.319 | 8  | 11.5 | Q2 |
| IPI00798102; | VPS29        | 23.5 | 6.06E-47  | 0.320 | 14 | 18.0 | Q2 |
| IPI00179473; | SQSTM1       | 7.5  | 5.12E-52  | 0.321 | 2  | 11.5 | Q2 |
| IPI00220271; | AKR1A1       | 58.5 | 6.07E-241 | 0.322 | 21 | 11.7 | Q2 |
| IPI00783313; | PYGL         | 40.9 | <1.0E-304 | 0.322 | 30 | 10.1 | Q2 |
| IPI00032140; | SERPINH1     | 55.5 | <1.0E-304 | 0.323 | 25 | 11.2 | Q2 |
| IPI00021831; | PRKAR1A      | 19.2 | 4.51E-98  | 0.323 | 7  | 50.0 | Q2 |
| IPI00220835  | SEC61B       | 21.9 | 4.19E-05  | 0.323 | 4  | 36.8 | Q2 |
| IPI00292657; | PTGR1        | 18.2 | 6.72E-10  | 0.329 | 6  | 46.1 | Q2 |
| IPI00023555; | OSBPL3       | 6.2  | 2.53E-88  | 0.329 | 2  | 19.4 | Q2 |
| IPI00784414; | STAT3        | 15.1 | 9.58E-62  | 0.331 | 4  | 7.9  | Q2 |
| IPI00022228; | HDLBP        | 39.1 | <1.0E-304 | 0.331 | 5  | 15.5 | Q2 |
| IPI00442073; | CSRP1        | 55.4 | 1.29E-128 | 0.333 | 14 | 28.8 | Q2 |
| IPI00293564; | HMGCL        | 27.4 | 4.42E-108 | 0.333 | 4  | 17.4 | Q2 |
| IPI00014898; | PLEC1        | 68.9 | <1.0E-304 | 0.333 | 31 | 51.5 | Q2 |
| IPI00011302  | CD59         | 25   | 3.46E-27  | 0.333 | 9  | 19.4 | Q2 |
| IPI00152599  | OTUD6A       | 2.8  | 1.60E-03  | 0.334 | 2  | 3.5  | Q2 |
| IPI00759776; | ACTN1        | 51.1 | <1.0E-304 | 0.334 | 64 | 11.1 | Q2 |
| IPI00456925; | DBNL         | 38.6 | 5.59E-94  | 0.335 | 13 | 8.6  | Q2 |
| IPI00219034  | NDUFA8       | 51.2 | 6.38E-63  | 0.336 | 2  | 19.3 | Q2 |
| IPI00874047; | MRPS36       | 44.7 | 7.57E-22  | 0.336 | 4  | 20.9 | Q2 |
| IPI00008164  | PREP         | 28.5 | <1.0E-304 | 0.337 | 9  | 17.3 | Q2 |
| IPI00021129; | AP3B1        | 26.1 | 2.40E-128 | 0.338 | 11 | 16.9 | Q2 |



|              |               |      |           |       |    |       |    |
|--------------|---------------|------|-----------|-------|----|-------|----|
| IPI00796333; | ALDOA         | 66.5 | <1.0E-304 | 0.338 | 48 | 17.4  | Q2 |
| IPI00514234; | LAD1          | 25.7 | 6.66E-169 | 0.338 | 20 | 36.1  | Q2 |
| IPI00033600; | PPP1R7        | 25.6 | 2.06E-109 | 0.339 | 8  | 7.5   | Q2 |
| IPI00002149; | SAR1B         | 23.2 | 5.38E-38  | 0.341 | 3  | 9.0   | Q2 |
| IPI00328715  | MTDH          | 9.3  | 9.97E-36  | 0.342 | 2  | 33.8  | Q2 |
| IPI00790757; | DUSP3         | 26.7 | 1.81E-65  | 0.343 | 11 | 8.6   | Q2 |
| IPI00293276  | MIF           | 23.5 | 2.09E-17  | 0.343 | 17 | 11.5  | Q2 |
| IPI00216048; | PITPNA        | 28.5 | 6.15E-24  | 0.344 | 5  | 13.4  | Q2 |
| IPI00007321; | LYPLA1        | 17.5 | 3.42E-49  | 0.344 | 4  | 7.5   | Q2 |
| IPI00021347; | UBE2L3        | 47.4 | 1.23E-173 | 0.345 | 5  | 10.3  | Q2 |
| IPI00398708; | KLC1          | 18.3 | 4.65E-34  | 0.345 | 5  | 7.7   | Q2 |
| IPI00647885; | GSTM1         | 28.7 | 2.39E-49  | 0.346 | 7  | 27.5  | Q2 |
| IPI00033022; | DNM2          | 20.2 | 9.65E-74  | 0.347 | 11 | 17.0  | Q2 |
| IPI00873410; | CNN3          | 28.5 | 6.81E-84  | 0.347 | 14 | 28.3  | Q2 |
| IPI00056357  | C19orf10      | 37   | 6.53E-49  | 0.347 | 12 | 21.1  | Q2 |
| IPI00439948; | PPP1R13L      | 24.5 | 2.02E-110 | 0.347 | 5  | 17.1  | Q2 |
| IPI00027443; | DKFZp686F1612 | 13.6 | 7.83E-46  | 0.347 | 5  | 23.7  | Q2 |
| IPI00007166  | IER3IP1       | 9.8  | 1.68E-02  | 0.347 | 2  | 12.0  | Q2 |
| IPI00003128; | P4HA2         | 11.6 | 8.69E-33  | 0.348 | 6  | 120.6 | Q2 |
| IPI00748145; | GNAI2         | 49   | 1.43E-188 | 0.351 | 17 | 19.4  | Q2 |
| IPI00294472; | TMED5         | 21.4 | 1.82E-36  | 0.351 | 5  | 9.5   | Q2 |
| IPI00555902; | OCIAD2        | 63   | 2.06E-53  | 0.352 | 13 | 9.9   | Q2 |
| IPI00644127; | IARS          | 39   | <1.0E-304 | 0.352 | 3  | 14.7  | Q2 |
| IPI00871693; | VAMP3         | 52   | 2.46E-139 | 0.353 | 16 | 25.3  | Q2 |
| IPI00329801; | ANXA5         | 81.9 | <1.0E-304 | 0.354 | 32 | 8.3   | Q2 |
| IPI00872929; | APOBEC3C      | 32.8 | 2.45E-77  | 0.354 | 4  | 9.0   | Q2 |
| IPI00020944; | FDFT1         | 41   | 1.63E-204 | 0.354 | 15 | 9.0   | Q2 |
| IPI00302605; | SLC30A7       | 12.5 | 2.25E-26  | 0.355 | 3  | 15.0  | Q2 |
| IPI00908469  | TUBB6         | 33   | <1.0E-304 | 0.355 | 21 | 14.5  | Q2 |
| IPI00022664  | RABGGTA       | 3.7  | 3.80E-10  | 0.356 | 2  | 16.5  | Q2 |
| IPI00654820; | MT-ATP6       | 6.8  | 3.38E-04  | 0.357 | 2  | 1.0   | Q2 |
| IPI00872533; | CD2AP         | 8.5  | 1.73E-14  | 0.357 | 3  | 83.9  | Q2 |
| IPI00008483; | MAOA          | 4    | 1.09E-12  | 0.358 | 4  | 6.3   | Q2 |
| IPI00027240; | GNG5          | 47.1 | 3.25E-11  | 0.358 | 5  | 21.4  | Q2 |
| IPI00299571; | PDIA6         | 44.5 | <1.0E-304 | 0.359 | 24 | 12.1  | Q2 |

|              |          |      |           |       |    |      |    |
|--------------|----------|------|-----------|-------|----|------|----|
| IPI00021466; | PAIP1    | 10.2 | 4.78E-34  | 0.360 | 4  | 9.6  | Q2 |
| IPI00238209  | NUDCD3   | 6.9  | 1.18E-42  | 0.360 | 2  | 2.3  | Q2 |
| IPI00410162; | TCEB2    | 43.5 | 1.42E-56  | 0.361 | 20 | 19.5 | Q2 |
| IPI00219685; | NDUFA13  | 15.9 | 3.18E-09  | 0.361 | 4  | 9.2  | Q2 |
| IPI00009247; | MP68     | 25.3 | 7.19E-02  | 0.361 | 4  | 20.1 | Q2 |
| IPI00011592; | DYNC1LI2 | 20.3 | 5.20E-174 | 0.363 | 8  | 15.3 | Q2 |
| IPI00180240; | TMSL3    | 31.8 | 1.12E-24  | 0.363 | 2  | 4.1  | Q2 |
| IPI00297475; | DPM3     | 13.1 | 3.90E-05  | 0.363 | 2  | 12.0 | Q2 |
| IPI00023598; | TUBB4    | 9.7  | <1.0E-304 | 0.364 | 9  | 11.7 | Q2 |
| IPI00473014; | DSTN     | 50.3 | 1.24E-90  | 0.365 | 21 | 19.8 | Q2 |
| IPI00000070; | LDLR     | 21.5 | 6.24E-160 | 0.366 | 8  | 14.5 | Q2 |
| IPI00646015; | ACOT9    | 28.8 | 7.47E-79  | 0.367 | 11 | 24.3 | Q2 |
| IPI00924788; | AADACL1  | 12.5 | 1.49E-30  | 0.368 | 3  | 33.8 | Q2 |
| IPI00029629  | TRIM25   | 21.7 | 7.30E-143 | 0.370 | 12 | 13.3 | Q2 |
| IPI00438170; | SNX12    | 34.3 | 3.37E-37  | 0.371 | 6  | 10.3 | Q2 |
| IPI00376344; | MYO1B    | 39.3 | <1.0E-304 | 0.371 | 28 | 11.5 | Q2 |
| IPI00017510  | MT-CO2   | 35.2 | 1.19E-101 | 0.371 | 5  | 10.3 | Q2 |
| IPI00219953; | CMPK1    | 40.8 | 5.91E-97  | 0.371 | 9  | 14.2 | Q2 |
| IPI00031583; | USO1     | 19.6 | 3.10E-157 | 0.371 | 10 | 17.6 | Q2 |
| IPI00927658; | RPL32    | 47.7 | 2.94E-74  | 0.372 | 12 | 23.0 | Q2 |
| IPI00029468; | ACTR1A   | 51.1 | <1.0E-304 | 0.372 | 16 | 8.8  | Q2 |
| IPI00031616; | C17orf37 | 13.6 | 8.77E-07  | 0.372 | 3  | 11.7 | Q2 |
| IPI00218733; | SOD1     | 59.1 | 9.66E-100 | 0.373 | 5  | 16.9 | Q2 |
| IPI00874235; | ERGIC1   | 14.8 | 4.70E-14  | 0.373 | 5  | 7.8  | Q2 |
| IPI00026268; | GNB1     | 13.5 | 2.46E-184 | 0.373 | 6  | 10.2 | Q2 |
| IPI00030116; | PGM3     | 8.9  | 7.12E-12  | 0.374 | 7  | 15.2 | Q2 |
| IPI00304577; | AP2A1    | 23.1 | 4.48E-218 | 0.375 | 16 | 16.0 | Q2 |
| IPI00005737; | SURF4    | 18.6 | 1.24E-54  | 0.375 | 4  | 7.1  | Q2 |
| IPI00220503; | DCTN2    | 44.8 | <1.0E-304 | 0.375 | 15 | 14.6 | Q2 |
| IPI00925804; | AIP      | 10.9 | 2.28E-17  | 0.376 | 3  | 28.1 | Q2 |
| IPI00004324; | TRAPPC3  | 36.1 | 1.75E-38  | 0.376 | 5  | 9.7  | Q2 |
| IPI00025156; | STUB1    | 31   | 5.12E-33  | 0.376 | 6  | 9.9  | Q2 |
| IPI00006663; | ALDH2    | 8.7  | 4.12E-10  | 0.377 | 7  | 48.2 | Q2 |
| IPI00006957; | DHRS7    | 16.8 | 1.04E-29  | 0.377 | 5  | 9.5  | Q2 |
| IPI00217766; | SCARB2   | 9.6  | 3.57E-07  | 0.378 | 3  | 16.2 | Q2 |

|              |          |      |           |       |    |      |    |
|--------------|----------|------|-----------|-------|----|------|----|
| IPI00060715; | KCTD12   | 31.1 | 3.17E-84  | 0.378 | 10 | 8.8  | Q2 |
| IPI00019385; | SSR4     | 34.2 | 1.20E-76  | 0.378 | 6  | 18.4 | Q2 |
| IPI00031420  | UGDH     | 21.7 | 4.05E-81  | 0.378 | 5  | 5.7  | Q2 |
| IPI00887678; | PPIA     | 52.9 | <1.0E-304 | 0.382 | 48 | 16.5 | Q2 |
| IPI00020887; | VAMP7    | 18.6 | 6.96E-11  | 0.383 | 4  | 2.6  | Q2 |
| IPI00020965; | UBE2H    | 26.8 | 1.10E-27  | 0.383 | 2  | 2.4  | Q2 |
| IPI00032830; | REXO2    | 27.8 | 4.80E-25  | 0.383 | 5  | 7.5  | Q2 |
| IPI00644231; | CYFIP1   | 26   | 8.54E-223 | 0.383 | 4  | 23.6 | Q2 |
| IPI00030911; | VAMP8    | 53   | 9.88E-76  | 0.385 | 12 | 41.5 | Q2 |
| IPI00002535  | FKBP2    | 19   | 7.78E-30  | 0.385 | 4  | 4.9  | Q2 |
| IPI00021263; | YWHAZ    | 62.9 | <1.0E-304 | 0.385 | 11 | 23.3 | Q2 |
| IPI00789155; | CALU     | 41.5 | 9.16E-130 | 0.386 | 13 | 16.5 | Q2 |
| IPI00298851  | CD151    | 9.9  | 7.41E-04  | 0.388 | 3  | 18.4 | Q2 |
| IPI00221327; | RTCD1    | 9    | 2.16E-20  | 0.388 | 5  | 14.9 | Q2 |
| IPI00852741; | SEC31A   | 20.4 | 3.56E-77  | 0.388 | 9  | 14.2 | Q2 |
| IPI00477118; | TMEM214  | 7.1  | 5.52E-49  | 0.388 | 4  | 11.3 | Q2 |
| IPI00022774; | VCP      | 57.2 | <1.0E-304 | 0.390 | 60 | 18.4 | Q2 |
| IPI00550682; | GRHPR    | 34.6 | 6.37E-163 | 0.391 | 8  | 4.0  | Q2 |
| IPI00029834; | RTKN     | 9.4  | 2.43E-53  | 0.391 | 5  | 8.4  | Q2 |
| IPI00183274; | SNX1     | 20.3 | 8.22E-49  | 0.392 | 5  | 11.7 | Q2 |
| IPI00872430; | RPS8     | 55.8 | 9.10E-173 | 0.393 | 14 | 21.5 | Q2 |
| IPI00008215  | ME1      | 11.2 | 6.49E-26  | 0.395 | 2  | 19.3 | Q2 |
| IPI00006865  | SEC22B   | 45.1 | 7.00E-169 | 0.397 | 15 | 19.3 | Q2 |
| IPI00002926; | VPS37B   | 34.7 | 1.46E-150 | 0.399 | 5  | 16.8 | Q2 |
| IPI00299468; | SCD      | 10.3 | 2.43E-26  | 0.401 | 2  | 9.4  | Q2 |
| IPI00010402; | SH3BGRL3 | 14.6 | 8.98E-34  | 0.401 | 4  | 14.6 | Q2 |
| IPI00298111; | SNX6     | 11.5 | 7.34E-34  | 0.401 | 5  | 12.2 | Q2 |
| IPI00017375; | SEC23A   | 20.8 | 3.48E-203 | 0.402 | 10 | 9.3  | Q2 |
| IPI00014361; | TSTA3    | 25.2 | 8.48E-30  | 0.403 | 6  | 9.0  | Q2 |
| IPI00878611; | RANBP1   | 25.4 | 6.33E-51  | 0.403 | 3  | 2.5  | Q2 |
| IPI00794543; | CALM1    | 59.9 | 1.26E-255 | 0.403 | 20 | 31.1 | Q2 |
| IPI00018314; | SEC14L2  | 22.1 | 1.82E-25  | 0.407 | 7  | 6.9  | Q2 |
| IPI00856116; | PALLD    | 8.8  | 5.37E-61  | 0.407 | 4  | 31.5 | Q2 |
| IPI00396967; | FHL2     | 33.7 | 9.64E-121 | 0.408 | 12 | 11.5 | Q2 |
| IPI00006176; | HGS      | 15.8 | 2.00E-60  | 0.408 | 2  | 26.2 | Q2 |

|              |          |      |           |       |    |      |    |
|--------------|----------|------|-----------|-------|----|------|----|
| IPI00032459; | AP3M1    | 16.3 | 3.28E-72  | 0.408 | 2  | 6.4  | Q2 |
| IPI00024661; | SEC24C   | 20.1 | 2.06E-160 | 0.408 | 6  | 9.3  | Q2 |
| IPI00329742; | FAHD2A   | 14   | 1.58E-38  | 0.410 | 2  | 9.0  | Q2 |
| IPI00219526; | PGM1     | 20.6 | 7.81E-44  | 0.410 | 11 | 27.7 | Q2 |
| IPI00419237; | LAP3     | 41   | 1.77E-179 | 0.410 | 19 | 9.1  | Q2 |
| IPI00011619; | PAPSS1   | 14.9 | 3.00E-62  | 0.412 | 4  | 34.0 | Q2 |
| IPI00743335; | MYO1C    | 37.1 | <1.0E-304 | 0.412 | 14 | 10.9 | Q2 |
| IPI00418446  | ASAH1    | 11.7 | 1.02E-09  | 0.413 | 5  | 72.3 | Q2 |
| IPI00554521; | FTH1     | 46.4 | 8.78E-49  | 0.415 | 13 | 44.3 | Q2 |
| IPI00220642; | YWHAG    | 51   | 9.32E-174 | 0.416 | 3  | 13.3 | Q2 |
| IPI00927606; | GPX1     | 73.9 | 5.74E-175 | 0.417 | 8  | 8.2  | Q2 |
| IPI00295400; | WARS     | 32.5 | 3.21E-281 | 0.420 | 14 | 8.4  | Q2 |
| IPI00291419  | ACAT2    | 38   | 2.31E-264 | 0.424 | 17 | 11.2 | Q2 |
| IPI00017704  | COTL1    | 40.8 | 9.69E-15  | 0.424 | 24 | 24.4 | Q2 |
| IPI00433279; | SLFN5    | 14.3 | 7.72E-95  | 0.424 | 5  | 9.2  | Q2 |
| IPI00783736; | PTMS     | 16.4 | 1.84E-12  | 0.425 | 4  | 5.9  | Q2 |
| IPI00877662; | RAB13    | 12.5 | 2.79E-56  | 0.426 | 3  | 5.3  | Q2 |
| IPI00783982; | COPG     | 37.8 | <1.0E-304 | 0.428 | 23 | 20.7 | Q2 |
| IPI00013723; | PIN1     | 39.9 | 6.32E-125 | 0.429 | 3  | 16.9 | Q2 |
| IPI00027014; | DCTN3    | 36   | 1.15E-17  | 0.429 | 9  | 9.1  | Q2 |
| IPI00016670  | C11orf59 | 46   | 1.08E-97  | 0.430 | 4  | 9.0  | Q2 |
| IPI00024067; | CLTC     | 50.3 | <1.0E-304 | 0.431 | 43 | 15.3 | Q2 |
| IPI00855767; | RAP1GDS1 | 15.1 | 6.29E-155 | 0.431 | 6  | 16.4 | Q2 |
| IPI00140420; | SND1     | 51.1 | <1.0E-304 | 0.431 | 37 | 8.1  | Q2 |
| IPI00215918; | ARF4     | 38.9 | 5.60E-152 | 0.432 | 12 | 23.2 | Q2 |
| IPI00010414  | PDLIM1   | 82.4 | <1.0E-304 | 0.436 | 36 | 32.8 | Q2 |
| IPI00171701  | ORMDL2   | 21.6 | 2.76E-30  | 0.439 | 7  | 30.9 | Q2 |
| IPI00333143; | DGKA     | 23.5 | 4.49E-220 | 0.440 | 10 | 11.4 | Q2 |
| IPI00394668; | ADAR     | 6.5  | 2.09E-88  | 0.441 | 3  | 19.6 | Q2 |
| IPI00176903; | PTRF     | 22.3 | 6.86E-246 | 0.441 | 23 | 22.9 | Q2 |
| IPI00294159; | SLC25A1  | 28.9 | 1.23E-48  | 0.443 | 9  | 9.1  | Q2 |
| IPI00018963; | PARVA    | 5.9  | 2.79E-34  | 0.443 | 2  | 5.8  | Q2 |
| IPI00009236; | CAV1     | 64.6 | 1.17E-143 | 0.443 | 24 | 25.8 | Q2 |
| IPI00019912; | HSD17B4  | 20.1 | 1.15E-109 | 0.444 | 12 | 20.5 | Q2 |
| IPI00413641; | AKR1B1   | 21.5 | 6.92E-11  | 0.444 | 5  | 8.9  | Q2 |

|              |                |      |           |       |    |       |    |
|--------------|----------------|------|-----------|-------|----|-------|----|
| IPI00167030  | KRTCAP2        | 10.5 | 9.50E-11  | 0.445 | 3  | 18.4  | Q2 |
| IPI00009904; | PDIA4          | 47.6 | <1.0E-304 | 0.445 | 28 | 15.5  | Q2 |
| IPI00010796; | P4HB           | 56.5 | 6.12E-209 | 0.446 | 49 | 17.7  | Q2 |
| IPI00027444; | SERPINB1       | 48.3 | 4.28E-202 | 0.450 | 30 | 15.9  | Q2 |
| IPI00027223; | IDH1           | 44.2 | 1.10E-236 | 0.452 | 21 | 14.6  | Q2 |
| IPI00005948; | MRI1           | 10.6 | 1.05E-14  | 0.452 | 3  | 21.5  | Q2 |
| IPI00871585; | BID            | 25.3 | 3.40E-42  | 0.454 | 3  | 5.8   | Q2 |
| IPI00009885; | FKBP11         | 11.9 | 8.93E-09  | 0.456 | 5  | 4.8   | Q2 |
| IPI00604523; | MYL12B         | 49.7 | 5.34E-126 | 0.456 | 19 | 4.1   | Q2 |
| IPI00032851; | COPZ1          | 30.5 | 2.76E-119 | 0.457 | 6  | 10.2  | Q2 |
| IPI00413293; | TOR1A          | 6    | 3.62E-06  | 0.457 | 3  | 9.5   | Q2 |
| IPI00747849; | ATP1B1         | 12.5 | 1.21E-25  | 0.459 | 4  | 22.6  | Q2 |
| IPI00301489; | UROD           | 10.1 | 1.19E-10  | 0.459 | 2  | 7.3   | Q2 |
| IPI00012451; | GNB4           | 8.8  | 2.83E-56  | 0.461 | 3  | 28.1  | Q2 |
| IPI00215997; | CD9            | 4.4  | 5.86E-10  | 0.461 | 6  | 41.7  | Q2 |
| IPI00296191; | ATP6V1H        | 10.8 | 2.07E-67  | 0.464 | 3  | 18.9  | Q2 |
| IPI00008569; | YKT6           | 53.5 | 1.05E-111 | 0.465 | 7  | 17.3  | Q2 |
| IPI00290337  | EPS8           | 1.3  | 8.80E-02  | 0.466 | 13 | 46.7  | Q2 |
| IPI00216691; | PFN1           | 90   | 9.26E-275 | 0.466 | 57 | 22.7  | Q2 |
| IPI00413451; | DKFZp686I04222 | 37.4 | 2.37E-109 | 0.469 | 11 | 22.3  | Q2 |
| IPI00025974; | CHMP4B         | 32.6 | 9.90E-54  | 0.469 | 4  | 21.3  | Q2 |
| IPI00021766; | RTN4           | 8    | 1.63E-70  | 0.470 | 15 | 48.7  | Q2 |
| IPI00007052  | FIS1           | 34.2 | 2.68E-64  | 0.470 | 4  | 26.4  | Q2 |
| IPI00022745; | MVD            | 20.8 | 1.56E-80  | 0.476 | 5  | 23.5  | Q2 |
| IPI00020124; | PI4K2A         | 16.5 | 1.41E-24  | 0.477 | 9  | 17.9  | Q2 |
| IPI00291238; | FBLIM1         | 22.5 | 6.79E-99  | 0.478 | 8  | 101.2 | Q2 |
| IPI00746004; | RPS27L         | 13.1 | 7.06E-16  | 0.481 | 3  | 33.1  | Q2 |
| IPI00220031; | PXN            | 15   | 9.87E-108 | 0.483 | 11 | 36.5  | Q2 |
| IPI00922223; | ATP6V0D1       | 16.8 | 2.97E-49  | 0.484 | 6  | 20.0  | Q2 |
| IPI00815770; | SNX3           | 46.3 | 1.82E-27  | 0.484 | 10 | 6.5   | Q2 |
| IPI00307547  | C9orf46        | 27.2 | 3.10E-15  | 0.486 | 7  | 21.7  | Q2 |
| IPI00005741; | MAPK13         | 9    | 1.84E-13  | 0.486 | 2  | 4.6   | Q2 |
| IPI00008351; | SELT           | 11.8 | 4.83E-06  | 0.486 | 2  | 33.8  | Q2 |
| IPI00026952  | PKP3           | 42.9 | <1.0E-304 | 0.486 | 21 | 24.4  | Q2 |
| IPI00026328  | TXNDC12        | 26.2 | 2.78E-69  | 0.487 | 2  | 52.7  | Q2 |

|              |          |      |           |       |    |      |    |
|--------------|----------|------|-----------|-------|----|------|----|
| IPI00216008; | G6PD     | 41.7 | 1.60E-144 | 0.487 | 28 | 25.9 | Q2 |
| IPI00329441; | RAB43    | 30.2 | 6.40E-30  | 0.488 | 6  | 20.6 | Q2 |
| IPI00796366; | MYL6     | 45   | 1.30E-182 | 0.488 | 36 | 22.9 | Q2 |
| IPI00328161; | FKBP8    | 5.4  | 3.83E-15  | 0.489 | 3  | 17.8 | Q2 |
| IPI00515106; | GUK1     | 19.1 | 6.10E-19  | 0.490 | 3  | 14.7 | Q2 |
| IPI00003096  | IL1A     | 31   | 1.92E-166 | 0.490 | 6  | 5.1  | Q2 |
| IPI00216225; | ITGA6    | 26.5 | 9.43E-219 | 0.492 | 12 | 63.4 | Q2 |
| IPI00027230; | HSP90B1  | 59.7 | <1.0E-304 | 0.493 | 69 | 12.5 | Q2 |
| IPI00295741; | CTSB     | 25.4 | 6.00E-103 | 0.496 | 11 | 27.0 | Q2 |
| IPI00296635  | GBE1     | 8.3  | 3.08E-10  | 0.497 | 3  | 21.1 | Q2 |
| IPI00024307  | EFNB1    | 14.2 | 6.51E-58  | 0.502 | 9  | 28.1 | Q3 |
| IPI00299977; | PHPT1    | 46.4 | 2.94E-96  | 0.504 | 4  | 22.2 | Q3 |
| IPI00156689; | VAT1     | 26.2 | 3.04E-169 | 0.506 | 12 | 12.2 | Q3 |
| IPI00019971; | STXBP2   | 11.4 | 1.20E-23  | 0.507 | 3  | 16.2 | Q3 |
| IPI00306353  | DUSP23   | 38.7 | 4.33E-40  | 0.508 | 7  | 13.8 | Q3 |
| IPI00382843; | PRNP     | 14.7 | 9.90E-40  | 0.509 | 5  | 27.8 | Q3 |
| IPI00513853; | STX12    | 16.7 | 9.32E-54  | 0.509 | 4  | 10.2 | Q3 |
| IPI00183603; | OSTC     | 18.1 | 7.20E-21  | 0.510 | 6  | 10.2 | Q3 |
| IPI00816474; | FAM127A  | 14.2 | 2.40E-02  | 0.511 | 2  | 9.7  | Q3 |
| IPI00299193  | SYNJ2BP  | 37.2 | 1.41E-12  | 0.512 | 6  | 16.1 | Q3 |
| IPI00012828; | ACAA1    | 21   | 3.69E-110 | 0.512 | 7  | 6.0  | Q3 |
| IPI00874185; | HIBCH    | 9.9  | 9.47E-26  | 0.513 | 3  | 18.7 | Q3 |
| IPI00025285; | ATP6V1G1 | 41.5 | 1.83E-54  | 0.513 | 5  | 11.6 | Q3 |
| IPI00000138; | MGAT1    | 8.5  | 8.90E-05  | 0.514 | 2  | 25.2 | Q3 |
| IPI00384047; | TRAPPC6B | 15.2 | 4.33E-02  | 0.515 | 3  | 19.6 | Q3 |
| IPI00026105; | SCP2     | 17.6 | 2.21E-62  | 0.516 | 19 | 59.3 | Q3 |
| IPI00299404; | LAMB3    | 47.3 | <1.0E-304 | 0.520 | 20 | 90.5 | Q3 |
| IPI00744015; | DYNC1I2  | 9.2  | 1.91E-57  | 0.521 | 3  | 3.5  | Q3 |
| IPI00027251; | STK38    | 6.9  | 6.01E-04  | 0.521 | 3  | 19.9 | Q3 |
| IPI00294158; | BLVRA    | 40.5 | 2.17E-80  | 0.521 | 10 | 10.4 | Q3 |
| IPI00747533; | PGD      | 40.7 | <1.0E-304 | 0.521 | 33 | 25.2 | Q3 |
| IPI00100154; | TOLLIP   | 25.2 | 1.45E-37  | 0.525 | 7  | 76.2 | Q3 |
| IPI00024915; | PRDX5    | 55.6 | 3.38E-248 | 0.526 | 12 | 22.0 | Q3 |
| IPI00910593; | CNN2     | 50.3 | 9.31E-187 | 0.527 | 24 | 20.0 | Q3 |
| IPI00294501  | DHCR7    | 16.6 | 7.47E-49  | 0.529 | 8  | 24.8 | Q3 |

|              |          |      |           |       |    |      |    |
|--------------|----------|------|-----------|-------|----|------|----|
| IPI00002441; | SDC1     | 18.1 | 1.20E-46  | 0.534 | 8  | 25.9 | Q3 |
| IPI00465132; | COPE     | 58.8 | <1.0E-304 | 0.536 | 18 | 12.0 | Q3 |
| IPI00219840; | AP2S1    | 16.9 | 9.11E-05  | 0.537 | 9  | 4.6  | Q3 |
| IPI00333541; | FLNA     | 58.3 | <1.0E-304 | 0.538 | 26 | 22.3 | Q3 |
| IPI00550917; | TWF2     | 46.1 | 4.33E-129 | 0.542 | 13 | 16.9 | Q3 |
| IPI00243221; | NRD1     | 18.8 | 8.64E-137 | 0.543 | 2  | 18.5 | Q3 |
| IPI00902584; | VASP     | 30.1 | 1.39E-67  | 0.546 | 9  | 15.3 | Q3 |
| IPI00010182; | DBI      | 51.7 | 2.73E-11  | 0.547 | 7  | 37.6 | Q3 |
| IPI00306604  | ITGA5    | 10.5 | 5.89E-126 | 0.547 | 3  | 5.6  | Q3 |
| IPI00307162; | VCL      | 59.7 | <1.0E-304 | 0.548 | 44 | 14.1 | Q3 |
| IPI00022824; | SH3GLB1  | 19.7 | 3.54E-50  | 0.549 | 7  | 25.7 | Q3 |
| IPI00396171; | MAP4     | 42.9 | 3.87E-278 | 0.551 | 6  | 21.6 | Q3 |
| IPI00020008; | NEDD8    | 28.4 | 1.73E-22  | 0.552 | 8  | 17.0 | Q3 |
| IPI00003362; | HSPA5    | 53.4 | <1.0E-304 | 0.552 | 93 | 26.6 | Q3 |
| IPI00152898; | AP1S1    | 36.7 | 1.13E-70  | 0.556 | 7  | 16.3 | Q3 |
| IPI00032134; | SERPINB8 | 20.1 | 1.98E-61  | 0.558 | 6  | 13.7 | Q3 |
| IPI00032498; | DCTN5    | 20.9 | 3.19E-24  | 0.561 | 2  | 20.0 | Q3 |
| IPI00014624  | AP3S1    | 18.1 | 1.22E-69  | 0.562 | 8  | 6.4  | Q3 |
| IPI00043598  | IKIP     | 8.5  | 7.68E-39  | 0.562 | 2  | 3.5  | Q3 |
| IPI00257508; | DPYSL2   | 26.6 | 6.22E-173 | 0.564 | 11 | 27.8 | Q3 |
| IPI00023191; | TOM1     | 5.8  | 7.47E-36  | 0.565 | 2  | 35.1 | Q3 |
| IPI00165949; | ERAP1    | 7    | 2.94E-58  | 0.567 | 2  | 18.4 | Q3 |
| IPI00026627  | RP2      | 5.1  | 9.86E-04  | 0.567 | 3  | 13.8 | Q3 |
| IPI00025463; | PHLDA1   | 2.2  | 6.43E-04  | 0.569 | 2  | 28.4 | Q3 |
| IPI00006713; | DNAJC3   | 19   | 3.03E-62  | 0.570 | 9  | 14.3 | Q3 |
| IPI00022020  | INPP4B   | 3.5  | 2.41E-26  | 0.573 | 2  | 15.9 | Q3 |
| IPI00793199; | ANXA4    | 61.1 | 4.33E-267 | 0.573 | 21 | 8.7  | Q3 |
| IPI00004358; | PYGB     | 60.3 | <1.0E-304 | 0.580 | 55 | 16.4 | Q3 |
| IPI00030059; | GNG10    | 26.5 | 7.06E-13  | 0.580 | 2  | 0.8  | Q3 |
| IPI00003482; | DECR1    | 37.3 | 3.12E-97  | 0.584 | 6  | 15.6 | Q3 |
| IPI00020672; | DPP3     | 23.6 | 5.22E-137 | 0.588 | 9  | 9.9  | Q3 |
| IPI00643342; | PEA15    | 27.8 | 2.53E-09  | 0.589 | 7  | 13.4 | Q3 |
| IPI00434390; | ASCC1    | 7.7  | 7.75E-15  | 0.590 | 2  | 38.5 | Q3 |
| IPI00299024; | BASP1    | 33.5 | 9.29E-39  | 0.592 | 5  | 11.9 | Q3 |
| IPI00375746; | GBP6     | 2.8  | 6.11E-29  | 0.595 | 2  | 12.9 | Q3 |

|              |                |      |           |       |     |      |    |
|--------------|----------------|------|-----------|-------|-----|------|----|
| IPI00019502; | MYH9           | 65.7 | <1.0E-304 | 0.599 | 45  | 18.8 | Q3 |
| IPI00299465; | LZTFL1         | 6.7  | 5.38E-05  | 0.602 | 2   | 18.3 | Q3 |
| IPI00027422; | ITGB4          | 29.4 | <1.0E-304 | 0.605 | 9   | 12.2 | Q3 |
| IPI00440703; | GSTK1          | 29.8 | 4.08E-113 | 0.605 | 4   | 2.8  | Q3 |
| IPI00000861; | LASP1          | 52.1 | 2.91E-72  | 0.607 | 23  | 49.3 | Q3 |
| IPI00872295; | ANXA8          | 48.9 | <1.0E-304 | 0.611 | 24  | 9.8  | Q3 |
| IPI00030782; | STAT6          | 6.3  | 2.17E-39  | 0.613 | 3   | 8.0  | Q3 |
| IPI00414315; | EPS8L2         | 6.6  | 6.33E-83  | 0.618 | 3   | 3.1  | Q3 |
| IPI00005585  | TAX1BP3        | 35.5 | 1.44E-72  | 0.622 | 9   | 36.1 | Q3 |
| IPI00141318; | CKAP4          | 44.2 | 2.19E-262 | 0.622 | 21  | 17.5 | Q3 |
| IPI00465436  | CAT            | 8.7  | 1.84E-21  | 0.629 | 3   | 22.5 | Q3 |
| IPI00746655; | FAM62A         | 32.9 | <1.0E-304 | 0.632 | 21  | 12.7 | Q3 |
| IPI00878256; | RBMS2          | 6.2  | 2.50E-22  | 0.641 | 2   | 22.9 | Q3 |
| IPI00639812; | MGST3          | 16.9 | 1.34E-65  | 0.643 | 2   | 8.8  | Q3 |
| IPI00305064; | CD44           | 8    | 1.28E-74  | 0.645 | 12  | 29.7 | Q3 |
| IPI00168036; | TMEM40         | 17.3 | 2.59E-54  | 0.646 | 3   | 40.1 | Q3 |
| IPI00221231  | NUDT2          | 37.4 | 1.94E-26  | 0.647 | 2   | 3.8  | Q3 |
| IPI00328753; | KTN1           | 22.8 | 2.00E-182 | 0.651 | 3   | 19.5 | Q3 |
| IPI00027032; | LYPLA2         | 29.4 | 5.46E-48  | 0.654 | 4   | 6.7  | Q3 |
| IPI00375552; | ANTXR2         | 3.1  | 1.91E-05  | 0.659 | 2   | 18.0 | Q3 |
| IPI00900293  | FLNB           | 62.1 | <1.0E-304 | 0.660 | 70  | 21.4 | Q3 |
| IPI00021290; | ACLY           | 49   | <1.0E-304 | 0.660 | 49  | 17.3 | Q3 |
| IPI00418169; | DKFZp686P03159 | 74.2 | <1.0E-304 | 0.661 | 185 | 26.2 | Q3 |
| IPI00796379; | B2M            | 21.3 | 3.37E-11  | 0.668 | 6   | 33.9 | Q3 |
| IPI00003565; | PSMD10         | 16.4 | 6.48E-13  | 0.675 | 7   | 20.5 | Q3 |
| IPI00007730; | C14orf1        | 16.4 | 8.27E-05  | 0.676 | 6   | 7.4  | Q3 |
| IPI00010270; | RAC2           | 22.9 | 1.84E-136 | 0.676 | 8   | 13.6 | Q3 |
| IPI00029601; | CTTN           | 27.8 | 2.01E-212 | 0.676 | 11  | 31.3 | Q3 |
| IPI00412497; | DYNLRB1        | 16.9 | 2.42E-21  | 0.678 | 7   | 29.9 | Q3 |
| IPI00873758; | PIK3C3         | 6.8  | 6.83E-12  | 0.678 | 2   | 12.1 | Q3 |
| IPI00097495; | TBC1D2         | 8.3  | 9.28E-58  | 0.679 | 4   | 26.7 | Q3 |
| IPI00219221  | LGALS7         | 57.4 | 2.27E-119 | 0.684 | 18  | 17.2 | Q3 |
| IPI00294619; | TFG            | 17   | 1.02E-31  | 0.687 | 11  | 41.8 | Q3 |
| IPI00017184; | EHD1           | 49.8 | 6.35E-202 | 0.692 | 32  | 15.8 | Q3 |
| IPI00644290; | NDRG3          | 4.9  | 2.84E-10  | 0.696 | 2   | 4.5  | Q3 |



|              |          |      |           |       |    |      |    |
|--------------|----------|------|-----------|-------|----|------|----|
| IPI00009456; | NT5E     | 26.8 | 7.55E-130 | 0.699 | 12 | 12.8 | Q3 |
| IPI00000783; | PSMB8    | 30.1 | 4.01E-63  | 0.703 | 6  | 15.9 | Q3 |
| IPI00219825; | PSAP     | 8.9  | 1.01E-39  | 0.704 | 12 | 41.2 | Q3 |
| IPI00018236  | GM2A     | 22.8 | 7.63E-07  | 0.705 | 5  | 15.4 | Q3 |
| IPI00015117; | LAMC2    | 47   | <1.0E-304 | 0.711 | 18 | 30.3 | Q3 |
| IPI00023122; | PDLIM7   | 16   | 1.34E-24  | 0.713 | 5  | 9.8  | Q3 |
| IPI00019463; | EIF2AK2  | 18.1 | 2.12E-56  | 0.714 | 11 | 11.1 | Q3 |
| IPI00646689; | TXNDC17  | 44.7 | 3.00E-44  | 0.718 | 12 | 26.5 | Q3 |
| IPI00032970; | OSBPL11  | 2.8  | 1.07E-02  | 0.719 | 2  | 25.3 | Q3 |
| IPI00658000; | IGF2BP3  | 18   | 2.44E-120 | 0.720 | 4  | 22.0 | Q3 |
| IPI00554788; | KRT18    | 72.3 | <1.0E-304 | 0.729 | 61 | 45.5 | Q3 |
| IPI00896381; | PIP5K2C  | 17.8 | 2.72E-92  | 0.730 | 7  | 3.7  | Q3 |
| IPI00295857; | COPA     | 46.5 | <1.0E-304 | 0.732 | 9  | 35.7 | Q3 |
| IPI00016179  | S100A13  | 55.1 | 8.30E-22  | 0.735 | 15 | 39.4 | Q3 |
| IPI00005181; | PLSCR1   | 7.5  | 6.05E-03  | 0.736 | 2  | 4.4  | Q3 |
| IPI00003783; | MAP2K2   | 5.8  | 1.67E-30  | 0.737 | 2  | 9.7  | Q3 |
| IPI00215998; | CD63     | 12.6 | 2.72E-08  | 0.740 | 12 | 13.4 | Q3 |
| IPI00002569  | EIF4EBP1 | 25.4 | 4.89E-12  | 0.746 | 3  | 13.3 | Q3 |
| IPI00397366; | PPFIBP1  | 15.3 | 2.65E-124 | 0.746 | 4  | 18.8 | Q3 |
| IPI00002745; | CTSZ     | 15.8 | 8.77E-41  | 0.772 | 2  | 8.2  | Q3 |
| IPI00296526; | NAGK     | 40.3 | 4.02E-187 | 0.775 | 14 | 14.0 | Q3 |
| IPI00007426; | ARL6IP5  | 24.5 | 4.59E-12  | 0.776 | 4  | 12.6 | Q3 |
| IPI00303882; | M6PRBP1  | 46.3 | <1.0E-304 | 0.780 | 20 | 14.9 | Q3 |
| IPI00465261; | ERAP2    | 13.9 | 9.47E-73  | 0.792 | 8  | 17.7 | Q3 |
| IPI00010348; | DNASE2   | 3.3  | 9.19E-13  | 0.803 | 2  | 71.2 | Q3 |
| IPI00013683; | TUBB3    | 18.9 | <1.0E-304 | 0.811 | 16 | 55.5 | Q3 |
| IPI00914566; | FDPS     | 20.3 | 1.83E-83  | 0.817 | 12 | 9.6  | Q3 |
| IPI00021399  | FGFBP1   | 24.8 | 8.14E-37  | 0.819 | 3  | 15.0 | Q3 |
| IPI00013744  | ITGA2    | 26.2 | 1.52E-274 | 0.834 | 9  | 20.4 | Q3 |
| IPI00744319; | PRRC1    | 11.4 | 3.96E-57  | 0.838 | 4  | 17.9 | Q3 |
| IPI00027505; | ITGAV    | 15.6 | 1.79E-91  | 0.839 | 2  | 47.2 | Q3 |
| IPI00307223; | IL1B     | 19.3 | 3.29E-21  | 0.841 | 4  | 27.2 | Q3 |
| IPI00413778; | FKBP1A   | 31   | 9.52E-66  | 0.849 | 10 | 30.7 | Q3 |
| IPI00183786; | FADS2    | 17.3 | 6.11E-19  | 0.851 | 3  | 3.2  | Q3 |
| IPI00894325; | HLA-A    | 17   | 4.56E-94  | 0.855 | 6  | 8.1  | Q3 |

|              |          |      |           |       |    |       |    |
|--------------|----------|------|-----------|-------|----|-------|----|
| IPI00013475; | TUBB2A   | 8.1  | <1.0E-304 | 0.856 | 3  | 22.6  | Q3 |
| IPI00871988; | SFXN3    | 41.3 | 1.29E-182 | 0.857 | 9  | 11.6  | Q3 |
| IPI00007926; | RCL      | 30.5 | 1.04E-36  | 0.858 | 5  | 21.7  | Q3 |
| IPI00305010; | CPPED1   | 7    | 4.28E-08  | 0.861 | 2  | 10.0  | Q3 |
| IPI00065063  | DHRS1    | 10.9 | 8.71E-39  | 0.862 | 2  | 14.8  | Q3 |
| IPI00107555; | PFN2     | 30.9 | 4.01E-77  | 0.864 | 5  | 10.3  | Q3 |
| IPI00293260; | DNAJC10  | 10.2 | 1.39E-95  | 0.866 | 4  | 11.9  | Q3 |
| IPI00018744; | TRADD    | 10.6 | 8.77E-10  | 0.867 | 2  | 26.5  | Q3 |
| IPI00012023  | AREG     | 7.9  | 4.11E-08  | 0.885 | 3  | 29.7  | Q3 |
| IPI00012069; | NQO1     | 28.1 | 1.62E-22  | 0.898 | 4  | 9.6   | Q3 |
| IPI00016915  | IGFBP7   | 9.2  | 5.88E-30  | 0.913 | 2  | 11.1  | Q3 |
| IPI00027983  | CDA      | 46.6 | 5.95E-84  | 0.916 | 3  | 9.4   | Q3 |
| IPI00220709; | TPM2     | 26.1 | 1.05E-121 | 0.918 | 6  | 33.3  | Q3 |
| IPI00296353; | ARHGAP18 | 9.5  | 1.25E-88  | 0.926 | 3  | 7.9   | Q3 |
| IPI00023673; | LGALS3BP | 12.8 | 1.15E-39  | 0.938 | 4  | 19.2  | Q3 |
| IPI00021978; | PEX11B   | 12.7 | 1.12E-19  | 0.938 | 2  | 8.0   | Q3 |
| IPI00056334; | PRKCDBP  | 44.1 | 5.99E-111 | 0.938 | 11 | 34.5  | Q3 |
| IPI00020418  | RRAS     | 20.6 | 1.62E-108 | 0.940 | 7  | 267.3 | Q3 |
| IPI00217272; | AACS     | 11.5 | 1.01E-17  | 0.949 | 5  | 29.8  | Q3 |
| IPI00253036; | CD99     | 5.4  | 1.78E-07  | 0.968 | 3  | 14.6  | Q3 |
| IPI00554648; | KRT8     | 59.6 | <1.0E-304 | 0.978 | 78 | 26.9  | Q3 |
| IPI00001699; | PYCARD   | 54.4 | 4.45E-108 | 0.981 | 4  | 9.4   | Q3 |
| IPI00027463  | S100A6   | 74.4 | 3.30E-15  | 1.000 | 30 | 16.1  | Q3 |
| IPI00012756; | IFIT5    | 7.7  | 1.67E-50  | 1.004 | 3  | 26.6  | Q3 |
| IPI00894395; | PSMB9    | 14.2 | 3.57E-22  | 1.006 | 2  | 2.2   | Q3 |
| IPI00877174; | OAS3     | 20   | 4.45E-84  | 1.016 | 8  | 11.2  | Q3 |
| IPI00026781  | FASN     | 52   | <1.0E-304 | 1.057 | 25 | 22.4  | Q3 |
| IPI00000105; | MVP      | 47.7 | <1.0E-304 | 1.080 | 35 | 16.5  | Q3 |
| IPI00293074; | SLC44A2  | 3.1  | 1.52E-02  | 1.081 | 3  | 17.5  | Q3 |
| IPI00296099; | THBS1    | 33.7 | 3.92E-300 | 1.108 | 8  | 25.1  | Q3 |
| IPI00030781; | STAT1    | 37.6 | 1.25E-223 | 1.109 | 25 | 15.5  | Q3 |
| IPI00010133; | CORO1A   | 3.9  | 6.40E-05  | 1.110 | 2  | 4.9   | Q3 |
| IPI00651622; | OAS1     | 2.8  | 4.67E-26  | 1.111 | 2  | 6.9   | Q3 |
| IPI00896498; | MMP14    | 7.7  | 1.04E-21  | 1.119 | 5  | 32.1  | Q3 |
| IPI00100775; | C11orf67 | 44.3 | 7.13E-16  | 1.139 | 6  | 11.2  | Q3 |

|              |          |      |           |       |     |       |    |
|--------------|----------|------|-----------|-------|-----|-------|----|
| IPI00218475; | IFI35    | 26   | 3.84E-38  | 1.143 | 6   | 24.2  | Q3 |
| IPI00398272; | COL17A1  | 10   | 5.44E-61  | 1.144 | 24  | 37.5  | Q3 |
| IPI00022348; | PML      | 5.1  | 1.52E-11  | 1.158 | 4   | 13.0  | Q3 |
| IPI00026314; | GSN      | 43.6 | <1.0E-304 | 1.168 | 27  | 10.5  | Q3 |
| IPI00847342; | KRT7     | 56.1 | <1.0E-304 | 1.181 | 84  | 19.1  | Q3 |
| IPI00020446; | CD82     | 9    | 4.97E-13  | 1.194 | 6   | 50.1  | Q3 |
| IPI00005981; | TAGLN3   | 35.3 | 6.05E-25  | 1.224 | 5   | 18.1  | Q3 |
| IPI00030936  | TSPAN1   | 5.4  | 4.67E-26  | 1.249 | 4   | 7.5   | Q3 |
| IPI00022498; | MT2A     | 67.2 | 3.59E-114 | 1.284 | 5   | 35.1  | Q3 |
| IPI00303726; | IFITM3   | 48.9 | 1.92E-71  | 1.295 | 4   | 13.7  | Q3 |
| IPI00220770; | DCTN6    | 9.5  | 1.39E-08  | 1.299 | 3   | 5.0   | Q3 |
| IPI00032206; | PDLIM4   | 30.6 | 2.51E-27  | 1.308 | 10  | 44.7  | Q3 |
| IPI00294739; | SAMHD1   | 6.5  | 1.74E-57  | 1.315 | 2   | 7.6   | Q3 |
| IPI00005682  | HSD11B1  | 14.7 | 7.34E-07  | 1.331 | 3   | 16.6  | Q3 |
| IPI00025318; | SH3BGRL  | 55.3 | 9.96E-93  | 1.361 | 9   | 30.7  | Q3 |
| IPI00219718; | RBP1     | 18.8 | 1.08E-23  | 1.373 | 8   | 26.1  | Q3 |
| IPI00789324; | JUP      | 66.8 | <1.0E-304 | 1.380 | 77  | 92.0  | Q3 |
| IPI00219219; | LGALS1   | 71.9 | 1.10E-255 | 1.382 | 37  | 37.8  | Q3 |
| IPI00002459; | ANXA6    | 50.5 | 7.25E-281 | 1.441 | 18  | 18.2  | Q3 |
| IPI00103373  | CYGB     | 30   | 4.42E-24  | 1.457 | 5   | 8.5   | Q3 |
| IPI00217049; | OAS2     | 15.4 | 1.24E-41  | 1.489 | 7   | 22.5  | Q3 |
| IPI00024107; | SNCA     | 32.1 | 8.85E-13  | 1.510 | 2   | 3.8   | Q3 |
| IPI00479145; | KRT19    | 29.5 | <1.0E-304 | 1.646 | 25  | 45.9  | Q3 |
| IPI00872692; | QPRT     | 12.7 | 5.95E-23  | 1.647 | 3   | 8.6   | Q3 |
| IPI00007087; | FBXO2    | 25   | 2.00E-55  | 1.678 | 5   | 5.3   | Q3 |
| IPI00005996; | HMGA2    | 41.3 | 7.24E-94  | 1.680 | 6   | 32.3  | Q3 |
| IPI00167949; | MX1      | 47.3 | <1.0E-304 | 1.716 | 24  | 10.2  | Q3 |
| IPI00024254  | IFIT3    | 15.1 | 4.36E-52  | 1.785 | 6   | 25.3  | Q3 |
| IPI00328243; | PLD3     | 8.4  | 5.66E-24  | 1.863 | 3   | 15.0  | Q3 |
| IPI00018300  | IFIT1    | 10.5 | 3.01E-47  | 1.877 | 5   | 24.1  | Q3 |
| IPI00007118; | SERPINE1 | 14.7 | 1.61E-27  | 1.916 | 6   | 11.3  | Q3 |
| IPI00418471; | VIM      | 76.4 | <1.0E-304 | 1.946 | 123 | 34.6  | Q3 |
| IPI00375631  | ISG15    | 41.2 | 1.43E-88  | 2.006 | 12  | 36.3  | Q3 |
| IPI00748788; | MTM1     | 2.5  | 1.80E-02  | 2.075 | 4   | 270.0 | Q3 |
| IPI00377045; | LAMA3    | 14   | <1.0E-304 | 2.139 | 24  | 41.3  | Q3 |

|              |          |      |           |       |    |      |    |
|--------------|----------|------|-----------|-------|----|------|----|
| IPI00032313  | S100A4   | 25.7 | 1.10E-06  | 2.284 | 5  | 63.5 | Q3 |
| IPI00871843; | TGM2     | 21.6 | 1.09E-135 | 2.292 | 12 | 40.2 | Q3 |
| IPI00914871; | SERPINE2 | 13.4 | 2.51E-27  | 2.588 | 5  | 20.5 | Q3 |
| IPI00845263; | FN1      | 13.5 | <1.0E-304 | 2.618 | 8  | 26.8 | Q3 |
| IPI00001560; | CDKN2A   | 37.7 | 9.51E-68  | 2.716 | 3  | 98.2 | Q3 |

**Supplementary table 5: Fibroblast phosphorylation site dynamics during cell culture.** Phosphopeptides were purified from unlabeled fibroblasts (D1) and compared to phosphopeptides from labeled fibroblasts (D14) using MaxQuant.<sup>11</sup> Only sites with a localization probability >0.75 were considered (class I sites).<sup>12</sup> Peptides were identified with a false-discovery rate <1%. For details see experimental section.

| Position | Proteins     | Gene Names     | Localization Prob | Number of Phospho sites (STY) | Amino Acid | PEP        | PTM Score | Modified Sequence           | Charge | m/z     | norm Log2 peptide ratio |
|----------|--------------|----------------|-------------------|-------------------------------|------------|------------|-----------|-----------------------------|--------|---------|-------------------------|
| 4903     | IPI00021812; | AHNAK          | 0.85              | 1                             | S          | 0.119399   | 51.98     | _LSGPS(ph)LKM(ox)PSLEISAPK_ | 3      | 617.649 | -5.12                   |
| 788      | IPI00375731; | RBM10          | 1                 | 1                             | S          | 0.126598   | 58.94     | _LASDDRPS(ph)PPR_           | 2      | 645.796 | -4.27                   |
| 3360     | IPI00021812  | AHNAK          | 0.99              | 1                             | S          | 2.54E-10   | 121.73    | _FNFS(ph)GSK_               | 2      | 433.676 | -3.4                    |
| 279      | IPI00176903; | PTRF           | 1                 | 1                             | T          | 0.0837656  | 63.85     | _LGT(ph)RLVPAER_            | 2      | 596.316 | -3.36                   |
| 181      | IPI00253036; | CD99           | 1                 | 1                             | T          | 0.00801416 | 86.822    | _NANAEPVQRT(ph)LLEK_        | 2      | 867.433 | -3.31                   |
| 5773     | IPI00021812; | AHNAK          | 1                 | 1                             | S          | 0.0096245  | 97.769    | _FSLFKS(ph)K_               | 2      | 468.733 | -3.2                    |
| 5720     | IPI00021812; | AHNAK          | 1                 | 1                             | S          | 0.0719115  | 72.206    | _FNFS(ph)KPK_               | 2      | 474.223 | -3.14                   |
| 427      | IPI00218694; | CALD1          | 1                 | 1                             | S          | 0.0587974  | 84.823    | _AEFLNKS(ph)VQK_            | 2      | 622.308 | -3.08                   |
| 5031     | IPI00021812; | AHNAK          | 1                 | 1                             | S          | 0.163614   | 97.769    | _IHM(ox)S(ph)GPK_           | 2      | 433.186 | -3.05                   |
| 6        | IPI00829992  | MYO1C          | 1                 | 1                             | S          | 8.69E-05   | 108.14    | _YRAS(ph)ALGSDGVR_          | 2      | 666.309 | -3.05                   |
| 941      | IPI00396171; | MAP4           | 0.99              | 1                             | S          | 0.0295307  | 120.67    | _VGS(ph)TENIK_              | 2      | 464.213 | -3.02                   |
| 1445     | IPI00021812; | AHNAK          | 1                 | 1                             | S          | 0.0021709  | 92.163    | _M(ox)PEM(ox)S(ph)IKPQK_    | 2      | 650.787 | -2.95                   |
| 657      | IPI00412650  | SVIL           | 1                 | 1                             | T          | 0.0542305  | 68.459    | _FRT(ph)QPITSAER_           | 2      | 693.332 | -2.8                    |
| 12       | IPI00333770; | DOCK10         | 1                 | 1                             | S          | 0.163803   | 50        | _S(ph)LLRPGQAAELR_          | 2      | 695.864 | -2.74                   |
| 1142     | IPI00647185; | CEP170         | 0.99              | 1                             | S          | 7.20E-06   | 102.36    | _LGEAS(ph)DSELADADK_        | 2      | 750.809 | -2.62                   |
| 444      | IPI00910030; | PLEKHA5        | 1                 | 1                             | T          | 0.032903   | 74.039    | _GVISYQT(ph)LPR_            | 2      | 607.302 | -2.62                   |
| 5824     | IPI00021812; | AHNAK          | 1                 | 1                             | T          | 3.43E-13   | 147.5     | _FGT(ph)FGGLGSK_            | 2      | 525.736 | -2.61                   |
| 231      | IPI00001871  | PAWR           | 0.87              | 1                             | S          | 0.186767   | 50.855    | _STTS(ph)VSEEDVSSR_         | 2      | 732.299 | -2.61                   |
| 44       | IPI00418169; | DKFZp686P03159 | 1                 | 1                             | S          | 5.97E-08   | 110.18    | _LSLEGDHSTPPSAYGS(ph)VK_    | 3      | 642.294 | -2.59                   |
| 5863     | IPI00021812; | AHNAK          | 0.9               | 1                             | S          | 1.45E-09   | 124.18    | _SRLS(ph)SSSSNDSGNK_        | 2      | 753.315 | -2.57                   |
| 158      | IPI00021812  | AHNAK          | 1                 | 1                             | T          | 0.0181847  | 73.06     | _RVT(ph)AYTVDVTGR_          | 2      | 709.345 | -2.51                   |
| 461      | IPI00413100; | PHLDB1         | 0.99              | 1                             | S          | 0.0265948  | 78.538    | _ELPPLS(ph)PSLSR_           | 2      | 638.321 | -2.43                   |
| 181      | IPI00216138  | TAGLN          | 1                 | 1                             | S          | 0.00045484 | 124.22    | _HVIQLQM(ox)GS(ph)NR_       | 3      | 436.536 | -2.41                   |
| 1314     | IPI00307545; | TNS1           | 1                 | 1                             | S          | 9.08E-28   | 171.16    | _HLGGSGSVVPGS(ph)PCLDR_     | 2      | 887.901 | -2.36                   |
| 4962     | IPI00856045; | AHNAK2         | 1                 | 1                             | S          | 0.157762   | 60.67     | _IKLPS(ph)FR_               | 2      | 470.754 | -2.36                   |
| 163      | IPI00219301  | MARCKS         | 1                 | 2                             | S          | 0.0620688  | 83.047    | _S(ph)FKLSGFS(ph)FK_        | 2      | 654.277 | -2.34                   |

|      |              |          |      |   |   |            |        |                           |   |         |       |
|------|--------------|----------|------|---|---|------------|--------|---------------------------|---|---------|-------|
| 1073 | IPI00396171; | MAP4     | 1    | 1 | S | 7.13E-06   | 105.65 | _VGS(ph)LDNVGHLPGGAVK_    | 3 | 557.614 | -2.33 |
| 226  | IPI00173549; | SYNPO2   | 0.88 | 1 | S | 0.00423486 | 93.536 | _SKS(ph)PDPDPNLSHDR_      | 3 | 548.905 | -2.28 |
| 697  | IPI00647185; | CEP170   | 0.96 | 1 | S | 0.0325543  | 63.932 | _VVTQRS(ph)EIGEKQDTELQEK_ | 3 | 766.372 | -2.24 |
| 1281 | IPI00292817  | KIAA1462 | 1    | 1 | S | 0.0498288  | 63.588 | _NADS(ph)QEDAEELK_        | 2 | 714.78  | -2.17 |
| 129  | IPI00796485  | CLASP2   | 0.88 | 1 | S | 0.00815097 | 73.116 | _LGAGALNAGSYAS(ph)LGR_    | 2 | 779.375 | -2.16 |
| 3408 | IPI00856045; | AHNAK2   | 1    | 1 | S | 0.00317762 | 89.162 | _VDLKS(ph)PQVDIK_         | 2 | 661.342 | -2.1  |
| 452  | IPI00171636; | NAV1     | 1    | 1 | S | 0.0071244  | 88.268 | _RNS(ph)TIVLR_            | 2 | 519.776 | -2.06 |
| 946  | IPI00220581; | DLGAP4   | 1    | 1 | S | 0.100622   | 58.94  | _DKAS(ph)DASDKQR_         | 2 | 650.78  | -2.04 |
| 99   | IPI00021812; | AHNAK    | 0.99 | 1 | T | 7.79E-10   | 124.18 | _SPEPGQT(ph)WTR_          | 2 | 619.764 | -2.02 |
| 3362 | IPI00021812  | AHNAK    | 0.87 | 1 | S | 2.54E-10   | 121.73 | _FNFSGS(ph)KVQTEVDVK_     | 3 | 621.296 | -2.02 |
| 765  | IPI00856045; | AHNAK2   | 1    | 1 | S | 0.0719115  | 72.206 | _VQRPS(ph)LK_             | 2 | 454.242 | -2.01 |
| 3426 | IPI00021812  | AHNAK    | 1    | 1 | S | 1.79E-06   | 113.06 | _VSM(ox)PDVELNLKS(ph)PK_  | 2 | 826.902 | -2    |
| 21   | IPI00419932  | RAB12    | 1    | 1 | S | 0.0163768  | 66.648 | _AGGGGGLGAGS(ph)PALSQQ_   | 2 | 832.381 | -1.97 |
| 839  | IPI00872577; | PPP1R12B | 0.99 | 1 | S | 1.93E-08   | 115.7  | _LES(ph)GGSNPTTSDSYGDR_   | 2 | 911.86  | -1.96 |
| 637  | IPI00916402; | AAK1     | 0.91 | 1 | S | 1.22E-07   | 115.7  | _ILS(ph)DVTHSAVFGVPASK_   | 3 | 603.305 | -1.91 |
| 5830 | IPI00021812; | AHNAK    | 1    | 1 | S | 3.43E-13   | 147.5  | _FGTFGGLGS(ph)K_          | 2 | 525.736 | -1.91 |
| 234  | IPI00173549; | SYNPO2   | 0.82 | 1 | S | 0.00423486 | 93.536 | _SKSPDPDPNLS(ph)HDR_      | 2 | 822.854 | -1.87 |
| 5841 | IPI00021812; | AHNAK    | 0.98 | 1 | S | 0.0455317  | 63.904 | _GHYEVTGS(ph)DDETGK_      | 2 | 787.804 | -1.87 |
| 1508 | IPI00410666; | SCRIB    | 1    | 1 | S | 0.0582156  | 96.193 | _MKS(ph)LEQDALR_          | 2 | 635.797 | -1.86 |
| 5780 | IPI00021812; | AHNAK    | 1    | 2 | S | 0.130392   | 114.35 | _HRS(ph)NS(ph)FSDER_      | 3 | 465.501 | -1.85 |
| 5864 | IPI00021812; | AHNAK    | 0.79 | 1 | S | 1.45E-09   | 124.18 | _LSS(ph)SSSNDSGNK_        | 2 | 631.748 | -1.84 |
| 456  | IPI00555838; | MARK2    | 1    | 1 | S | 0.00474099 | 89.162 | _VPAS(ph)PLPLGLER_        | 2 | 608.31  | -1.83 |
| 909  | IPI00647185; | CEP170   | 0.83 | 1 | S | 1.33E-16   | 143.81 | _S(ph)ESLDPDSSMDTTLILK_   | 2 | 966.431 | -1.8  |
| 1381 | IPI00307545; | TNS1     | 0.96 | 1 | S | 0.146049   | 54.274 | _QGS(ph)PTPALPEKR_        | 3 | 454.226 | -1.73 |
| 1374 | IPI00307155; | ROCK2    | 1    | 1 | S | 0.0339086  | 76.318 | _IQQNQS(ph)IR_            | 2 | 533.756 | -1.72 |
| 4564 | IPI00021812  | AHNAK    | 1    | 1 | T | 1.02E-19   | 155.4  | _VGIDT(ph)PDIDIHGPEGK_    | 3 | 581.605 | -1.72 |
| 526  | IPI00032936  | ERF      | 1    | 1 | T | 0.00576649 | 92.082 | _GEGPGEAGGPLT(ph)PR_      | 2 | 687.806 | -1.7  |
| 5321 | IPI00021812; | AHNAK    | 1    | 1 | S | 6.02E-08   | 124.22 | _GDLASVPS(ph)M(ox)K_      | 2 | 608.252 | -1.7  |
| 319  | IPI00020513; | ZYX      | 0.99 | 1 | S | 5.40E-05   | 104.52 | _GPPASS(ph)PAPAPK_        | 2 | 578.774 | -1.68 |

|      |              |           |      |   |   |            |        |                                                 |   |          |       |
|------|--------------|-----------|------|---|---|------------|--------|-------------------------------------------------|---|----------|-------|
| 170  | IPI00744702; | FAM125A   | 1    | 1 | S | 2.14E-06   | 106.79 | _DM(ox)QGLS(ph)LDAASQPSK_                       | 2 | 822.353  | -1.68 |
| 1393 | IPI00307545; | TNS1      | 1    | 1 | S | 1.72E-05   | 126.79 | _RMS(ph)VGDR_                                   | 2 | 450.692  | -1.65 |
| 143  | IPI00337530; | REPS1     | 0.99 | 1 | S | 0.0488029  | 63.85  | _KGS(ph)VSHDTVQPR_                              | 3 | 464.221  | -1.64 |
| 680  | IPI00514275; | TNIK      | 1    | 1 | S | 0.139938   | 63.85  | _TTSIS(ph)PALAR_                                | 2 | 548.774  | -1.63 |
| 1269 | IPI00307545; | TNS1      | 0.87 | 1 | S | 0.140787   | 54.649 | _VATTPGS(ph)PSLGR_                              | 2 | 611.795  | -1.63 |
| 1583 | IPI00856045; | AHNAK2    | 1    | 1 | S | 0.157762   | 60.67  | _VQM(ox)PS(ph)FK_<br>_YLSPGWGS(ph)AS(ph)EEEEPSR | 2 | 466.701  | -1.62 |
| 58   | IPI00414661; | LARP6     | 1    | 2 | S | 0.0406926  | 59.887 | _YLSPGWGS(ph)AS(ph)EEEEPSR                      | 2 | 956.364  | -1.6  |
| 56   | IPI00414661; | LARP6     | 1    | 2 | S | 0.0406926  | 59.887 |                                                 | 2 | 956.364  | -1.6  |
| 564  | IPI00061280; | MTMR12    | 1    | 1 | S | 0.168309   | 54.274 | _QLS(ph)LPLTQSK_                                | 2 | 597.81   | -1.57 |
| 268  | IPI00182540; | CTNND1    | 0.5  | 1 | S | 0.00485455 | 133.79 | _VGGS(ph)SVDLHR_                                | 2 | 553.753  | -1.56 |
| 346  | IPI00290292; | RHBDF1    | 0.92 | 1 | S | 0.00081819 | 93.536 | _LRQEVVS(ph)TAGPR_                              | 2 | 696.853  | -1.55 |
| 5542 | IPI00856045; | AHNAK2    | 0.92 | 1 | S | 0.0587974  | 84.823 | _VYTTM(ox)TQHS(ph)R_                            | 2 | 660.276  | -1.55 |
| 22   | IPI00022164; | ARHGEF12  | 1    | 1 | S | 0.0719115  | 72.206 | _HGS(ph)ILNR_                                   | 2 | 438.708  | -1.55 |
| 261  | IPI00029601  | CTTN      | 1    | 1 | S | 0.0265948  | 78.538 | _LQLHES(ph)QKDYK_<br>_S(ph)GNWESSEGWGAQPEGA     | 2 | 734.845  | -1.55 |
| 116  | IPI00001883  | SNX9      | 1    | 1 | S | 2.33E-53   | 194.68 | GAQR_                                           | 2 | 1120.953 | -1.55 |
| 11   | IPI00871693; | VAMP3     | 0.99 | 1 | S | 0.00891055 | 83.047 | _(ac)STGPTAATGS(ph)NR_                          | 2 | 621.262  | -1.54 |
| 696  | IPI00217683; | AKAP12    | 1    | 1 | S | 6.63E-13   | 166.7  | _RGS(ph)SSDEEGPK_<br>_ATS(ph)NVFAM(ox)FDQSQIQE  | 2 | 643.256  | -1.54 |
| 20   | IPI00604523; | MYL12B    | 0.91 | 1 | S | 3.64E-38   | 187    | FK_                                             | 2 | 1093.977 | -1.49 |
| 450  | IPI00419504; | MAP3K7IP2 | 0.92 | 1 | S | 0.00474099 | 89.162 | _AIGNNSATS(ph)PR_<br>_GPGSWWTS(ph)TESLCSNASG    | 2 | 584.261  | -1.49 |
| 83   | IPI00760962; | KANK2     | 0.84 | 1 | S | 1.51E-10   | 102.36 | DSR_                                            | 2 | 1161.46  | -1.43 |
| 430  | IPI00413100; | PHLDB1    | 1    | 1 | S | 0.181464   | 117.35 | _TFS(ph)DGLATR_                                 | 2 | 524.229  | -1.41 |
| 560  | IPI00014340; | PPP1R12C  | 0.96 | 1 | T | 6.63E-13   | 166.7  | _RST(ph)QGVTLTDLK_<br>_FAELPEFRPEEVLPSPH)PTLQSL | 2 | 699.853  | -1.39 |
| 1373 | IPI00045360  | CIC       | 0.93 | 2 | S | 5.33E-05   | 77.726 | ATS(ph)PR_                                      | 3 | 1024.489 | -1.39 |
| 932  | IPI00409590; | LMO7      | 1    | 1 | T | 1.06E-15   | 175.85 | _SYT(ph)MDDAWK_                                 | 2 | 598.72   | -1.37 |
| 954  | IPI00782992; | SRRM2     | 1    | 2 | S | 0.0528113  | 66.765 | _S(ph)VS(ph)PCSNVESR_                           | 2 | 691.246  | -1.36 |
| 952  | IPI00782992; | SRRM2     | 1    | 2 | S | 0.0528113  | 66.765 | _S(ph)VS(ph)PCSNVESR_                           | 2 | 691.246  | -1.36 |
| 788  | IPI00304227; | CDH11     | 0.99 | 1 | S | 0.0738263  | 60.018 | _LADLYGS(ph)KDTFDDDS_                           | 2 | 871.346  | -1.34 |
| 541  | IPI00915443; | CTAGE5    | 1    | 1 | S | 0.0730553  | 55.439 | _AFLS(ph)PPTLLEGPLR_                            | 2 | 795.918  | -1.33 |
| 8    | IPI00012011; | CFL1      | 0.99 | 1 | S | 2.10E-25   | 195.04 | _(ac)ASGVAVS(ph)DGVIK_                          | 2 | 612.797  | -1.33 |

|      |              |          |      |   |   |            |        |                                                  |   |          |       |
|------|--------------|----------|------|---|---|------------|--------|--------------------------------------------------|---|----------|-------|
| 11   | IPI00761160; | CAST     | 1    | 1 | S | 1.79E-06   | 113.06 | _(ac)SQPGQKPAAS(ph)PRPR_                         | 2 | 799.894  | -1.32 |
| 507  | IPI00183002; | PPP1R12A | 1    | 1 | S | 5.99E-17   | 160.03 | _RLAS(ph)TSDIEEK_                                | 2 | 664.808  | -1.32 |
| 2702 | IPI00782992; | SRRM2    | 0.9  | 1 | S | 0.139938   | 63.85  | _RRPS(ph)PQPSPR_                                 | 2 | 629.314  | -1.31 |
| 352  | IPI00182540; | CTNND1   | 1    | 1 | S | 5.67E-06   | 112.01 | _GSLASLDS(ph)LRK_                                | 2 | 613.811  | -1.31 |
| 2407 | IPI00782992  | SRRM2    | 1    | 2 | S | 0.140787   | 54.649 | _ARS(ph)RT(ph)PPSAPSQSR_                         | 3 | 553.245  | -1.31 |
| 2155 | IPI00742682  | TPR      | 1    | 1 | S | 1.61E-29   | 163.43 | _TDGFAEAIHS(ph)PQVAGVPR_                         | 2 | 966.454  | -1.31 |
| 432  | IPI00871680; | ARFGAP2  | 1    | 1 | S | 2.32E-05   | 147.5  | _AIS(ph)SDMFFGR_                                 | 2 | 605.752  | -1.3  |
| 381  | IPI00815713; | TCOF1    | 1    | 1 | S | 5.67E-06   | 112.01 | _AASAPAKES(ph)PR_                                | 2 | 582.774  | -1.29 |
| 2271 | IPI00008868  | MAP1B    | 1    | 1 | S | 0.132877   | 55.439 | _SKPLAAS(ph)PKPAGLK_                             | 2 | 722.9    | -1.28 |
| 573  | IPI00000030; | PPP2R5D  | 1    | 1 | S | 3.34E-09   | 120.05 | _RKS(ph)ELPQDVYTIK_<br>_NAIS(ph)LPQLNQAAYDSL VVG | 2 | 828.921  | -1.28 |
| 121  | IPI00023605; | CDC42EP1 | 1    | 1 | S | 1.92E-07   | 91.447 | K_                                               | 2 | 1091.051 | -1.27 |
| 427  | IPI00746455; | FARP1    | 1    | 1 | S | 3.37E-16   | 139.73 | _VSAGEPGSHPS(ph)PAPR_                            | 2 | 763.343  | -1.27 |
| 4430 | IPI00021812  | AHNAK    | 1    | 1 | T | 3.61E-21   | 156.33 | _GPSLDIDT(ph)PDVNIEGPEGK_                        | 2 | 1016.959 | -1.24 |
| 445  | IPI00183002; | PPP1R12A | 1    | 1 | S | 1.75E-18   | 151.49 | _KTGS(ph)YGALAEITASK_                            | 2 | 788.885  | -1.24 |
| 288  | IPI00019169; | SH3GL1   | 1    | 1 | S | 6.61E-05   | 143.48 | _IAASSS(ph)FR_<br>_APRS(ph)PPVGS GPASGVEPTSF     | 2 | 459.708  | -1.23 |
| 87   | IPI00102313  | SRA1     | 0.98 | 1 | S | 0.0064533  | 52.064 | PVESEAR_                                         | 3 | 915.768  | -1.22 |
| 600  | IPI00396279; | CLASP1   | 0.98 | 1 | S | 7.07E-20   | 172.81 | _SRS(ph)DIDVNAASAK_                              | 2 | 742.841  | -1.21 |
| 570  | IPI00021812; | AHNAK    | 0.97 | 1 | S | 0.132877   | 55.439 | _IS(ph)M(ox)SEVDLNVAAPK_                         | 2 | 785.365  | -1.2  |
| 509  | IPI00856045; | AHNAK2   | 0.99 | 1 | S | 0.0719115  | 72.206 | _RLS(ph)TPQR_                                    | 2 | 469.234  | -1.18 |
| 12   | IPI00746455; | FARP1    | 1    | 1 | S | 0.140787   | 54.649 | _(ac)GEIEQRPTPGS(ph)R_                           | 2 | 724.83   | -1.17 |
| 471  | IPI00019427; | EXOC1    | 0.99 | 1 | T | 0.0582156  | 96.193 | _LTGST(ph)SSLNK_                                 | 2 | 544.255  | -1.16 |
| 427  | IPI00033025; | 7-Sep    | 1    | 1 | T | 7.44E-10   | 131.77 | _ILEQQNSSRT(ph)LEK_                              | 2 | 813.398  | -1.16 |
| 278  | IPI00101968; | DBNL     | 0.99 | 1 | S | 1.79E-06   | 113.06 | _AMS(ph)TTSISSPQPGK_                             | 2 | 736.329  | -1.15 |
| 993  | IPI00292753; | GAPVD1   | 0.89 | 1 | S | 0.168309   | 54.274 | _KDS(ph)DDEKSDR_                                 | 2 | 637.748  | -1.15 |
| 743  | IPI00304817  | SASH1    | 1    | 1 | S | 0.0071244  | 88.268 | _KAS(ph)LLSAK_                                   | 2 | 449.244  | -1.13 |
| 696  | IPI00183002; | PPP1R12A | 1    | 1 | T | 2.65E-77   | 246.74 | _RST(ph)QGVTLTDLQAEK_                            | 2 | 928.444  | -1.12 |
| 2047 | IPI00292771; | NUMA1    | 1    | 1 | S | 5.26E-11   | 131.77 | _RQS(ph)MAFSILNTPK_                              | 2 | 786.884  | -1.12 |
| 521  | IPI00396171; | MAP4     | 1    | 1 | T | 0.00576649 | 92.082 | _DVT(ph)PPPETEVLK_                               | 2 | 808.913  | -1.11 |
| 604  | IPI00871686; | CLASP2   | 0.98 | 1 | S | 5.03E-33   | 199.63 | _SRS(ph)DIDVNAAGAK_                              | 2 | 727.835  | -1.1  |
| 1038 | IPI00640092; | SH3PXD2A | 1    | 1 | S | 0.01165    | 74.039 | _AAS(ph)QGS D SPLLPAQR_                          | 2 | 789.37   | -1.09 |



|      |              |          |      |   |   |            |        |                                      |   |          |       |
|------|--------------|----------|------|---|---|------------|--------|--------------------------------------|---|----------|-------|
| 142  | IPI00023322; | DPF2     | 1    | 1 | S | 0.0248355  | 68.515 | _VDDDS(ph)LGEFPVNSR_                 | 2 | 865.867  | -1.07 |
| 34   | IPI00418471  | VIM      | 1    | 1 | S | 0.130392   | 114.35 | _SYVTTS(ph)TR_                       | 2 | 497.716  | -1.07 |
| 768  | IPI00010800; | NES      | 1    | 1 | S | 1.07E-13   | 135.71 | _S(ph)LGEQDQM(ox)TLRPPEK_            | 2 | 912.914  | -1.06 |
| 2209 | IPI00008868  | MAP1B    | 1    | 2 | S | 0.0698085  | 50.902 | _HMDPPPAPVQDRS(ph)PS(ph)<br>PR_      | 3 | 681.955  | -1.06 |
| 2211 | IPI00008868  | MAP1B    | 1    | 2 | S | 0.0698085  | 50.902 | _HMDPPPAPVQDRS(ph)PS(ph)<br>PR_      | 3 | 681.955  | -1.06 |
| 4100 | IPI00021812  | AHNAK    | 1    | 1 | T | 0.0008652  | 94.321 | _VDIDT(ph)PDIDIHGPEGK_               | 3 | 600.94   | -1.06 |
| 759  | IPI00296485  | MAP1S    | 0.87 | 1 | S | 1.92E-07   | 91.447 | _AVPMAPAPAS(ph)PGSSNDSSA<br>R_       | 2 | 975.425  | -1.06 |
| 3    | IPI00473014  | DSTN     | 1    | 1 | S | 9.13E-10   | 153.28 | _(ac)AS(ph)GVQVADEVCR_               | 2 | 706.797  | -1.05 |
| 21   | IPI00014263; | EIF4H    | 1    | 1 | S | 0.0498288  | 63.588 | _AYSSFGGGRGS(ph)R_                   | 2 | 641.272  | -1.04 |
| 624  | IPI00916402; | AAK1     | 0.84 | 2 | S | 0.120178   | 59.283 | _VGSLT(ph)PPSS(ph)PK_                | 2 | 615.264  | -1.04 |
| 105  | IPI00873899; | ABCF1    | 1    | 3 | S | 4.81E-10   | 121.73 | _KLS(ph)VPT(ph)S(ph)DEEDEV<br>APKPR_ | 2 | 1167.489 | -1.04 |
| 108  | IPI00873899; | ABCF1    | 1    | 3 | T | 4.81E-10   | 121.73 | _KLS(ph)VPT(ph)S(ph)DEEDEV<br>APKPR_ | 2 | 1167.489 | -1.04 |
| 150  | IPI00219301  | MARCKS   | 0.9  | 1 | T | 1.69E-05   | 101.13 | _AEDGATSPSNET(ph)PKK_                | 2 | 854.875  | -1.03 |
| 703  | IPI00856098; | RRBP1    | 0.85 | 1 | S | 0.0465702  | 68.459 | _KAEGS(ph)PSEGKK_                    | 2 | 599.279  | -1.02 |
| 763  | IPI00163496; | PPFIA1   | 0.99 | 1 | S | 0.146049   | 54.274 | _GALHTVS(ph)HEDIR_                   | 2 | 707.827  | -1.02 |
| 102  | IPI00029111  | LCRMP    | 1    | 1 | S | 0.00430468 | 71.274 | _EESREPAPAS(ph)PAPAGVEIR_            | 3 | 681.656  | -1.01 |
| 2737 | IPI00065931; | AKAP13   | 1    | 1 | S | 0.178313   | 81.177 | _RNS(ph)ISR_                         | 2 | 406.692  | -1.01 |
| 908  | IPI00183002; | PPP1R12A | 0.82 | 1 | S | 0.0684062  | 80.535 | _S(ph)GSYSYLEER_                     | 2 | 635.753  | -1    |
| 1149 | IPI00658152; | TNS3     | 1    | 1 | S | 2.13E-10   | 109.65 | _ASEAAS(ph)PLPDSPGDK_                | 2 | 761.327  | -1    |
| 851  | IPI00855787; | TNKS1BP1 | 0.9  | 1 | S | 0.0542305  | 68.459 | _KRDS(ph)QGTYSR_                     | 2 | 682.801  | -1    |
| 281  | IPI00737545  | SGK269   | 1    | 1 | S | 0.0071244  | 88.268 | _ANTLS(ph)PVR_                       | 2 | 469.229  | -1    |
| 614  | IPI00008868  | MAP1B    | 1    | 1 | S | 0.00077612 | 73.723 | _EVPSKEEPS(ph)PVKAEVAEK_             | 2 | 1016.996 | -0.99 |
| 99   | IPI00219774; | PRKAR2A  | 0.91 | 1 | S | 0.120565   | 47.631 | _RVS(ph)VCAETYNPDEEEEDTD<br>PR_      | 3 | 864.346  | -0.99 |
| 212  | IPI00410259; | PHLDB2   | 1    | 1 | S | 0.00462082 | 87.563 | _KM(ox)S(ph)IQDSLALQPK_              | 2 | 777.884  | -0.99 |
| 478  | IPI00215716; | EPB41L3  | 0.86 | 1 | S | 0.0255289  | 64.591 | _GIS(ph)QTNLITVTPEKK_                | 2 | 905.472  | -0.99 |
| 454  | IPI00514856; | UBAP2L   | 0.86 | 1 | S | 1.49E-09   | 96.015 | _SPAVATSTAAPPPSS(ph)PLPS<br>K_       | 2 | 1020.506 | -0.98 |
| 511  | IPI00021812; | AHNAK    | 1    | 1 | S | 1.79E-06   | 113.06 | _ISM(ox)QDVLDSLGS(ph)PK_             | 2 | 793.363  | -0.97 |

|      |              |         |      |   |   |            |        |                                        |   |          |       |
|------|--------------|---------|------|---|---|------------|--------|----------------------------------------|---|----------|-------|
| 476  | IPI00782992; | SRRM2   | 0.97 | 3 | T | 0.102871   | 69.772 | _DKS(ph)HS(ph)HT(ph)PSR_               | 2 | 696.231  | -0.97 |
| 474  | IPI00782992; | SRRM2   | 1    | 3 | S | 0.102871   | 69.772 | _DKS(ph)HS(ph)HT(ph)PSR_               | 2 | 696.231  | -0.97 |
| 472  | IPI00782992; | SRRM2   | 1    | 3 | S | 0.102871   | 69.772 | _DKS(ph)HS(ph)HT(ph)PSR_               | 2 | 696.231  | -0.97 |
| 147  | IPI00219301  | MARCKS  | 0.85 | 1 | S | 1.69E-05   | 101.13 | _AEDGATPPSPS(ph)NETPK_                 | 2 | 790.827  | -0.96 |
| 1123 | IPI00021812; | AHNAK   | 1    | 1 | S | 0.148248   | 44.424 | _APDVEGQGLDWS(ph)LKIPK_                | 3 | 644.987  | -0.96 |
| 162  | IPI00019432; | NAB2    | 0.99 | 2 | S | 0.122279   | 54.247 | _S(ph)FSPKS(ph)PLELGEK_                | 2 | 789.846  | -0.95 |
| 830  | IPI00871686; | CLASP2  | 0.94 | 1 | S | 0.0146204  | 61.011 | _VLNTGS(ph)DVEEAVADALK_                | 2 | 905.927  | -0.95 |
| 225  | IPI00000171  | TSC22D4 | 0.95 | 1 | S | 0.120298   | 45.991 | _VEAEAGGS(ph)GARTPPLSR_                | 2 | 867.912  | -0.94 |
| 2551 | IPI00642259; | DST     | 1    | 1 | S | 0.00069284 | 100.94 | _FDDS(ph)GSWR_                         | 2 | 525.19   | -0.94 |
| 377  | IPI00641582  | BAG3    | 0.98 | 2 | S | 0.0917701  | 36.064 | _VPPAPVPCPPPS(ph)PGPS(ph)AVPSSPK_      | 3 | 793.7    | -0.94 |
| 450  | IPI00059944  | RNF25   | 1    | 1 | S | 0.0260507  | 73.06  | _RES(ph)LGLESKDGS_                     | 2 | 679.303  | -0.93 |
| 805  | IPI00409590; | LMO7    | 1    | 1 | S | 8.98E-06   | 115.98 | _M(ox)YS(ph)FDDVLEEGK_                 | 2 | 764.799  | -0.9  |
| 876  | IPI00514071; | MAST2   | 0.82 | 1 | S | 0.0587223  | 51.98  | _SLS(ph)EEKEDHSDGLAGLK_                | 3 | 632.286  | -0.9  |
| 10   | IPI00760941; | ZNF316  | 0.98 | 1 | S | 0.00139945 | 91.397 | _(ac)AALHTTTPDS(ph)PAAQLER_            | 2 | 900.42   | -0.89 |
| 1281 | IPI00336047; | MYO9B   | 1    | 1 | S | 0.105009   | 65.094 | _SKPCGS(ph)PR_                         | 2 | 484.705  | -0.89 |
| 594  | IPI00456363; | ATXN2L  | 0.96 | 1 | S | 0.0139113  | 65.53  | _EVDGLLTSEPMGS(ph)PVSSK_               | 2 | 956.934  | -0.89 |
| 852  | IPI00412650; | SVIL    | 1    | 1 | T | 1.41E-12   | 130.49 | _YQT(ph)QPVTLGEVEQVQSGK_               | 2 | 1035.991 | -0.89 |
| 380  | IPI00328272; | ZDHHC5  | 0.99 | 1 | S | 0.0257447  | 60.547 | _LSRGDS(ph)LKEPTSIAESSR_               | 3 | 671.66   | -0.88 |
| 1395 | IPI00179298; | HUWE1   | 1    | 1 | S | 0.139938   | 63.85  | _AES(ph)PEEVACR_                       | 2 | 614.239  | -0.88 |
| 74   | IPI00030131; | TMPO    | 1    | 1 | T | 0.00124539 | 69.251 | _GPPDFSSDEEREPT(ph)PVLGSGAAAAGR_       | 3 | 884.064  | -0.88 |
| 448  | IPI00479912; | PXK     | 1    | 1 | S | 0.0265948  | 78.538 | _AQS(ph)HHGSEER_                       | 2 | 673.76   | -0.88 |
| 398  | IPI00782992; | SRRM2   | 0.96 | 2 | S | 2.81E-22   | 122.4  | _HGGS(ph)PQPLATTPLSQEPVNPPSEAS(ph)PTR_ | 3 | 1004.788 | -0.88 |
| 377  | IPI00782992; | SRRM2   | 1    | 2 | S | 2.81E-22   | 122.4  | _HGGS(ph)PQPLATTPLSQEPVNPPSEAS(ph)PTR_ | 3 | 1004.788 | -0.88 |
| 906  | IPI00173549; | SYNPO2  | 0.94 | 1 | S | 0.00462082 | 87.563 | _AQSPTPS(ph)LPASWK_                    | 2 | 725.342  | -0.86 |
| 141  | IPI00419979  | PAK2    | 1    | 1 | S | 0.0281936  | 130.93 | _YLS(ph)FTPPEK_                        | 2 | 581.265  | -0.86 |

|      |              |              |      |   |   |            |        |                                     |   |          |       |
|------|--------------|--------------|------|---|---|------------|--------|-------------------------------------|---|----------|-------|
| 300  | IPI00176903; | PTRF         | 1    | 1 | S | 1.17E-06   | 147.5  | _S(ph)FTPDPHVYAR_                   | 3 | 457.875  | -0.86 |
| 745  | IPI00032355; | PUM1         | 1    | 1 | S | 1.33E-14   | 160.79 | _RDS(ph)LTGSSDLYKR_                 | 3 | 526.582  | -0.86 |
| 335  | IPI00655754; | UFD1L        | 1    | 1 | S | 9.13E-10   | 153.28 | _FVAFSGEGQS(ph)LR_                  | 2 | 689.314  | -0.85 |
| 500  | IPI00303343  | SCAF1        | 0.99 | 2 | S | 0.12133    | 40.218 | _QRS(ph)PS(ph)PAPAPAPAAAA<br>GPPTR_ | 3 | 709.996  | -0.85 |
| 498  | IPI00303343  | SCAF1        | 0.99 | 2 | S | 0.12133    | 40.218 | _QRS(ph)PS(ph)PAPAPAPAAAA<br>GPPTR_ | 3 | 709.996  | -0.85 |
| 468  | IPI00410259; | PHLDB2       | 0.99 | 1 | S | 1.52E-05   | 104.52 | _LS(ph)TGTTVEDVQK_                  | 2 | 679.316  | -0.84 |
| 2397 | IPI00782992  | SRRM2        | 0.8  | 1 | T | 1.52E-05   | 104.52 | _T(ph)SPPLDR_                       | 2 | 489.736  | -0.83 |
| 348  | IPI00011689  | EEF2K        | 1    | 1 | T | 0.0295307  | 120.67 | _LLQSAKT(ph)ILR_                    | 2 | 611.85   | -0.82 |
| 29   | IPI00288941  | NCOA5        | 1    | 2 | S | 0.0539472  | 91.464 | _DRS(ph)PIRGS(ph)PR_                | 2 | 650.782  | -0.82 |
| 34   | IPI00288941  | NCOA5        | 1    | 2 | S | 0.0539472  | 91.464 | _DRS(ph)PIRGS(ph)PR_                | 2 | 650.782  | -0.82 |
| 313  | IPI00220102  | DNAJB2       | 1    | 2 | S | 0.122279   | 54.247 | _GEATKRS(ph)PS(ph)PEEK_             | 2 | 788.326  | -0.82 |
| 393  | IPI00464978  | IRS2         | 1    | 1 | S | 0.0248355  | 68.515 | _PVSVAGSPLS(ph)PGPVR_               | 2 | 750.385  | -0.81 |
| 208  | IPI00217490; | FNDC3B       | 1    | 1 | S | 0.0907378  | 74.039 | _LNS(ph)PPSSIIYK_                   | 2 | 593.281  | -0.81 |
| 868  | IPI00783285  | DKFZp434H018 | 0.99 | 1 | S | 0.0707661  | 56.22  | _GESDEPAPQVQPES(ph)PETVS<br>PK_     | 2 | 1144.502 | -0.81 |
| 881  | IPI00029012  | EIF3A        | 0.94 | 1 | S | 0.0021709  | 92.163 | _RLGDS(ph)SLSR_                     | 2 | 535.753  | -0.8  |
| 1456 | IPI00619921  | DIDO1        | 1    | 1 | S | 0.00222887 | 48.266 | _RNS(ph)VERPAEPVAGAATPSL<br>VEQQK_  | 3 | 872.104  | -0.8  |
| 941  | IPI00658152; | TNS3         | 0.95 | 1 | S | 0.0281936  | 130.93 | _RES(ph)SSSAER_                     | 2 | 544.722  | -0.8  |
| 5782 | IPI00021812; | AHNAK        | 1    | 1 | S | 0.130392   | 114.35 | _SNS(ph)FSDER_                      | 2 | 511.185  | -0.8  |
| 87   | IPI00384857; | HN1          | 0.9  | 1 | S | 0.00158631 | 96.604 | _RNS(ph)SEASSGDFDLK_                | 2 | 853.375  | -0.79 |
| 2581 | IPI00782992; | SRRM2        | 1    | 1 | S | 0.0295307  | 120.67 | _RVPS(ph)PTPAPK_                    | 2 | 565.292  | -0.79 |
| 299  | IPI00418125; | LAYN         | 0.9  | 1 | S | 0.00158631 | 96.604 | _KQS(ph)EADLAETRPDLK_               | 2 | 890.927  | -0.79 |
| 621  | IPI00029111; | LCRMP        | 0.98 | 1 | T | 7.59E-05   | 96.604 | _GM(ox)YDGPVFDLT(ph)TTPK_           | 2 | 869.376  | -0.78 |
| 243  | IPI00376119; | PRKACB       | 0.79 | 1 | T | 1.46E-13   | 130.49 | _T(ph)WTLCGTPEYLAPEIILSK_           | 2 | 1136.552 | -0.78 |
| 181  | IPI00903328; | AGFG1        | 0.99 | 1 | S | 0.0542305  | 68.459 | _GTPSQS(ph)PVVGR_                   | 2 | 582.774  | -0.77 |
| 351  | IPI00782992; | SRRM2        | 1    | 2 | S | 0.0177394  | 81.177 | _SATRPS(ph)PS(ph)PER_               | 2 | 672.771  | -0.77 |
| 353  | IPI00782992; | SRRM2        | 1    | 2 | S | 0.0177394  | 81.177 | _SATRPS(ph)PS(ph)PER_               | 2 | 672.771  | -0.77 |
| 3    | IPI00413344; | CFL2         | 1    | 1 | S | 0.00891055 | 83.047 | _(ac)AS(ph)GVTVNDEVIK_              | 2 | 677.319  | -0.77 |
| 358  | IPI00396171; | MAP4         | 0.89 | 1 | S | 0.00251508 | 82.056 | _ETERAS(ph)PIKMDLAPSK_              | 2 | 926.947  | -0.77 |
| 131  | IPI00018009  | EDC3         | 1    | 1 | S | 1.16E-17   | 151.49 | _SQDVAVS(ph)PQQQQCSK_               | 2 | 885.38   | -0.77 |
| 269  | IPI00182540; | CTNND1       | 1    | 1 | S | 0.00485455 | 133.79 | _VGGSS(ph)VDLHR_                    | 2 | 553.753  | -0.77 |
| 112  | IPI00032206; | PDLIM4       | 0.86 | 1 | S | 4.42E-17   | 143.81 | _IHIDPEIQDGS(ph)PTTSR_              | 2 | 923.423  | -0.75 |

|      |              |          |      |   |   |            |        |                            |   |          |       |
|------|--------------|----------|------|---|---|------------|--------|----------------------------|---|----------|-------|
| 979  | IPI00032064; | AKAP2    | 1    | 1 | S | 1.65E-09   | 161.82 | _QVLQSTQS(ph)PR_           | 2 | 612.293  | -0.75 |
| 509  | IPI00257508  | DPYSL2   | 1    | 1 | T | 0.010615   | 77.455 | _GLYDGPVCEVSVT(ph)PK_      | 2 | 850.884  | -0.75 |
| 510  | IPI00024062; | EPB41L1  | 1    | 1 | S | 0.0269185  | 76.632 | _HQAS(ph)INELKR_           | 3 | 425.878  | -0.75 |
| 2720 | IPI00022479  | HERC1    | 1    | 1 | S | 0.0194518  | 68.222 | _RQS(ph)LTSPDSQSAR_        | 2 | 756.844  | -0.75 |
| 146  | IPI00024816; | MFF      | 1    | 1 | S | 0.0179652  | 68.222 | _NDS(ph)LVTSPQQAR_         | 2 | 746.843  | -0.75 |
| 887  | IPI00178072  | CYTSA    | 0.97 | 1 | S | 0.00679166 | 69.159 | _HS(ph)ISGPISTSKPLTALSDK_  | 3 | 673.677  | -0.74 |
| 952  | IPI00304742  | STK10    | 0.87 | 1 | T | 0.010615   | 77.455 | _LSEEAECNPST(ph)PSK_       | 2 | 863.356  | -0.74 |
| 776  | IPI00658152; | TNS3     | 1    | 1 | S | 1.31E-34   | 167.52 | _KLS(ph)LGQYDNDAGGQLPFSK   | 2 | 1059.499 | -0.74 |
| 357  | IPI00152011; | ARHGAP29 | 0.95 | 1 | S | 0.0455317  | 63.904 | _AEEEEHLSSS(ph)GGLAK_      | 2 | 747.827  | -0.74 |
| 182  | IPI00002857; | MAPK14   | 1    | 2 | Y | 4.51E-09   | 117.63 | _HTDDEMT(ph)GY(ph)VATR_    | 2 | 828.294  | -0.74 |
| 180  | IPI00002857; | MAPK14   | 1    | 2 | T | 4.51E-09   | 117.63 | _HTDDEMT(ph)GY(ph)VATR_    | 2 | 828.294  | -0.74 |
| 517  | IPI00001738  | NUP88    | 1    | 1 | S | 0.0542305  | 68.459 | _EDVEVAES(ph)PLR_          | 2 | 662.295  | -0.73 |
| 8    | IPI00018963; | PARVA    | 0.99 | 1 | S | 0.00891055 | 83.047 | _(ac)ATSPQKS(ph)PSVPK_     | 2 | 674.829  | -0.73 |
| 636  | IPI00029111; | LCRMP    | 0.98 | 1 | S | 0.100242   | 60.662 | _GS(ph)PTRPNPPVR_          | 3 | 419.875  | -0.73 |
| 422  | IPI00012079; | EIF4B    | 0.86 | 2 | S | 2.38E-13   | 132.55 | _TGS(ph)ESS(ph)QTGTSTTSSR_ | 2 | 867.317  | -0.72 |
| 425  | IPI00012079; | EIF4B    | 1    | 2 | S | 2.38E-13   | 132.55 | _TGS(ph)ESS(ph)QTGTSTTSSR_ | 2 | 867.317  | -0.72 |
| 791  | IPI00297578; | FILIP1L  | 1    | 1 | S | 0.0295307  | 120.67 | _RIS(ph)DPQVFSK_           | 2 | 628.805  | -0.72 |
| 1147 | IPI00218397; | SBF1     | 0.83 | 1 | T | 0.00536001 | 83.047 | _LGLGT(ph)LSSLSR_          | 2 | 635.824  | -0.72 |
| 270  | IPI00395887; | TMX1     | 1    | 1 | S | 0.0794683  | 63.85  | _S(ph)LGPSLATDKS_          | 2 | 578.268  | -0.69 |
| 247  | IPI00395887; | TMX1     | 0.99 | 1 | S | 0.00433683 | 71.117 | _KVEEEQEADEEDVS(ph)EEEAES  | 2 | 1259.497 | -0.68 |
| 514  | IPI00257508  | DPYSL2   | 1    | 1 | T | 0.00011948 | 104.43 | _TVT(ph)PASSAK_            | 2 | 471.221  | -0.68 |
| 1378 | IPI00008868  | MAP1B    | 0.92 | 1 | S | 9.01E-26   | 156.33 | _ASVS(ph)PMDEPVPDSESPIEK_  | 2 | 1047.453 | -0.67 |
| 646  | IPI00396279; | CLASP1   | 0.98 | 1 | S | 4.24E-11   | 126.1  | _RQS(ph)SGSATNVASTPDNR_    | 2 | 914.403  | -0.67 |
| 1620 | IPI00855787; | TNKS1BP1 | 1    | 2 | S | 5.31E-22   | 167.35 | _VPS(ph)S(ph)DEEVVEEPQSR_  | 2 | 923.861  | -0.67 |
| 1621 | IPI00855787; | TNKS1BP1 | 1    | 2 | S | 5.31E-22   | 167.35 | _VPS(ph)S(ph)DEEVVEEPQSR_  | 2 | 923.861  | -0.67 |
| 338  | IPI00002580  | PIK3C2A  | 0.97 | 1 | S | 0.0719115  | 72.206 | _SQS(ph)LNIR_              | 2 | 449.213  | -0.67 |
| 374  | IPI00008918; | LIMA1    | 0.94 | 1 | S | 0.00045484 | 124.22 | _ASSLSESS(ph)PPK_          | 2 | 585.258  | -0.66 |

|      |              |           |      |   |   |            |        |                                                          |   |          |       |
|------|--------------|-----------|------|---|---|------------|--------|----------------------------------------------------------|---|----------|-------|
| 330  | IPI00013721  | PRPF4B    | 0.94 | 1 | S | 0.0071244  | 88.268 | _KPIKSPS(ph)K_                                           | 2 | 482.765  | -0.65 |
| 672  | IPI00855787; | TNKS1BP1  | 1    | 1 | S | 3.34E-09   | 120.05 | _AS(ph)PEPPGPESSSR_<br>_RAS(ph)M(ox)QPIQIAEGTGITT<br>R_  | 2 | 689.288  | -0.65 |
| 1969 | IPI00292771; | NUMA1     | 1    | 1 | S | 0.00106533 | 73.116 |                                                          | 3 | 675.998  | -0.65 |
| 462  | IPI00409607; | CAMSAP1L1 | 0.77 | 1 | S | 0.00053098 | 96.604 | _S(ph)ISNEGLTLNNSHVSK_                                   | 2 | 890.417  | -0.65 |
| 1491 | IPI00022479; | HERC1     | 0.99 | 1 | S | 0.0652798  | 69.555 | _SES(ph)LTAESR_                                          | 2 | 530.221  | -0.65 |
| 136  | IPI00398749; | PUM2      | 1    | 1 | S | 0.0260507  | 73.06  | _GKAS(ph)PFEEDQNR_                                       | 2 | 729.306  | -0.65 |
| 831  | IPI00008868  | MAP1B     | 1    | 2 | S | 3.50E-08   | 153.28 | _SLMS(ph)S(ph)PEDLTK_                                    | 2 | 684.264  | -0.64 |
| 832  | IPI00008868  | MAP1B     | 1    | 2 | S | 3.50E-08   | 153.28 | _SLM(ox)S(ph)S(ph)PEDLTK_                                | 2 | 692.261  | -0.64 |
| 1378 | IPI00410666; | SCRIB     | 1    | 1 | S | 0.0263958  | 72.844 | _RVS(ph)LVGADDLRK_                                       | 3 | 470.248  | -0.63 |
| 1598 | IPI00333753; | ITPR1     | 1    | 1 | S | 0.181464   | 117.35 | _RDS(ph)VLAASR_                                          | 2 | 527.756  | -0.62 |
| 203  | IPI00306195; | AKT1S1    | 1    | 1 | S | 0.00203185 | 89.162 | _S(ph)LPVSVPVWGFK_                                       | 2 | 698.357  | -0.62 |
| 1531 | IPI00782992; | SRRM2     | 0.97 | 1 | T | 0.0907378  | 74.039 | _TVART(ph)PLGQR_                                         | 2 | 589.806  | -0.62 |
| 876  | IPI00782992; | SRRM2     | 1    | 1 | S | 0.0260507  | 73.06  | _SCFESS(ph)PDPELK_<br>_FAS(ph)DDEHDEHDENGATGP<br>VKR_    | 2 | 738.292  | -0.62 |
| 366  | IPI00009032  | SSB       | 1    | 1 | S | 2.32E-32   | 165.93 |                                                          | 3 | 802.659  | -0.62 |
| 126  | IPI00306604  | ITGA5     | 0.8  | 1 | S | 7.14E-25   | 153.28 | _LLESSLS(ph)SSEGEEPVEYK_                                 | 2 | 1031.959 | -0.62 |
| 5763 | IPI00021812; | AHNAK     | 0.92 | 1 | S | 3.64E-38   | 187    | _ASLGSLGEGAEAEASS(ph)PK_                                 | 2 | 906.899  | -0.62 |
| 924  | IPI00169307; | ARHGAP21  | 0.97 | 1 | S | 0.0121282  | 77.654 | _KDS(ph)SSEVFSDAAK_                                      | 2 | 725.809  | -0.6  |
| 97   | IPI00292135; | LBR       | 0.88 | 1 | S | 0.00059706 | 120.67 | _S(ph)ASASHQADIK_<br>_LGHPEALSAGTGS(ph)PQPPSFT<br>YAQQR_ | 2 | 597.761  | -0.6  |
| 368  | IPI00020513; | ZYX       | 0.77 | 1 | S | 0.00168035 | 51.464 |                                                          | 3 | 893.085  | -0.6  |
| 908  | IPI00782992; | SRRM2     | 1    | 2 | S | 0.051426   | 69.667 | _S(ph)STPPRQS(ph)PSR_                                    | 2 | 680.276  | -0.6  |
| 31   | IPI00217661; | RAVER1    | 1    | 1 | S | 0.010615   | 77.455 | _(ac)AADVSVTHRPPLS(ph)PK_                                | 2 | 848.925  | -0.6  |
| 276  | IPI00409590; | LMO7      | 0.94 | 1 | S | 0.132877   | 55.439 | _GGREGFES(ph)DTDSEFTFK_                                  | 3 | 663.602  | -0.59 |
| 1026 | IPI00472160; | ARHGEF2   | 1    | 1 | S | 0.0652798  | 69.555 | _QELGS(ph)PEER_                                          | 2 | 562.735  | -0.59 |
| 284  | IPI00410067; | ZC3HAV1   | 1    | 1 | S | 0.0179652  | 68.222 | _AS(ph)LEDAPVDDLTR_                                      | 2 | 741.33   | -0.59 |
| 346  | IPI00883925; | FLJ00169  | 1    | 1 | S | 6.52E-34   | 189.08 | _S(ph)AGEEEDGVPVLTDEQK_                                  | 2 | 892.367  | -0.58 |
| 3    | IPI00012011; | CFL1      | 1    | 1 | S | 2.10E-25   | 195.04 | _(ac)AS(ph)GVAVSDGVIK_                                   | 2 | 612.797  | -0.58 |
| 333  | IPI00514705; | FAM21C    | 0.92 | 1 | S | 1.16E-17   | 151.49 | _RTPS(ph)DDEEDNLFAPPK_                                   | 2 | 955.912  | -0.58 |
| 288  | IPI00514705; | FAM21C    | 0.98 | 1 | S | 0.0121282  | 77.654 | _SRPTS(ph)FADELAAR_                                      | 2 | 750.846  | -0.58 |

|      |              |              |      |   |   |            |        |                                                          |   |          |       |
|------|--------------|--------------|------|---|---|------------|--------|----------------------------------------------------------|---|----------|-------|
| 84   | IPI00872944; | NUCKS1       | 1    | 1 | S | 1.31E-34   | 167.52 | _VVDYSQFQES(ph)DDADEDYG<br>R_                            | 2 | 1159.442 | -0.58 |
| 82   | IPI00006987; | DDX24        | 1    | 1 | S | 1.56E-19   | 145.45 | _AQAVS(ph)EEEEEEGKSSSPK_                                 | 2 | 1065.442 | -0.58 |
| 266  | IPI00006937  | UBE2J1       | 0.86 | 1 | S | 2.81E-11   | 130.49 | _RLS(ph)TSPDVIQGHQPR_                                    | 2 | 885.936  | -0.58 |
| 13   | IPI00375015  | DUT          | 0.91 | 1 | S | 0.00027174 | 102.36 | _PCSEETPAISPS(ph)KR_                                     | 2 | 819.863  | -0.58 |
| 160  | IPI00030131; | TMPO         | 0.91 | 1 | T | 4.42E-17   | 143.81 | _SST(ph)PLPTISSAENTR_                                    | 2 | 864.396  | -0.57 |
| 403  | IPI00472794; | FCHO2        | 1    | 1 | S | 0.181464   | 117.35 | _NLS(ph)NEELTK_                                          | 2 | 564.253  | -0.57 |
| 275  | IPI00003843; | TJP2         | 1    | 1 | S | 0.060343   | 108.14 | _GRS(ph)IDQDYER_                                         | 2 | 659.775  | -0.57 |
| 4524 | IPI00020557  | LRP1         | 0.91 | 1 | T | 0.060343   | 108.14 | _HSLAST(ph)DEKR_                                         | 3 | 408.519  | -0.57 |
| 727  | IPI00328293; | SRRM1        | 0.92 | 2 | S | 0.00572165 | 85.723 | _RQS(ph)PS(ph)PSTRPIR_                                   | 3 | 514.571  | -0.57 |
| 725  | IPI00328293; | SRRM1        | 0.99 | 2 | S | 0.00572165 | 85.723 | _RQS(ph)PS(ph)PSTRPIR_                                   | 3 | 514.571  | -0.57 |
| 1387 | IPI00008868  | MAP1B        | 0.98 | 1 | S | 9.01E-26   | 156.33 | _ASVSPMDEPVPDS(ph)ESPIEK_                                | 2 | 1047.453 | -0.57 |
| 119  | IPI00414008; | LMOD1        | 1    | 1 | S | 0.00485455 | 133.79 | _RDS(ph)DLGKEPK_                                         | 3 | 408.859  | -0.56 |
| 702  | IPI00782992; | SRRM2        | 1    | 3 | S | 0.00826384 | 87.138 | _S(ph)RS(ph)RS(ph)LVR_                                   | 2 | 600.738  | -0.56 |
| 704  | IPI00782992; | SRRM2        | 1    | 3 | S | 0.00826384 | 87.138 | _S(ph)RS(ph)RS(ph)LVR_                                   | 2 | 600.738  | -0.56 |
| 706  | IPI00782992; | SRRM2        | 1    | 3 | S | 0.00826384 | 87.138 | _S(ph)RS(ph)RS(ph)LVR_                                   | 2 | 600.738  | -0.56 |
| 100  | IPI00333215; | TCEA1        | 1    | 1 | S | 0.00158631 | 96.604 | _KKEPAITSQNS(ph)PEAR_                                    | 3 | 579.284  | -0.56 |
| 26   | IPI00418471  | VIM          | 0.88 | 1 | S | 7.48E-05   | 106.79 | _MFGGPGTASRPSS(ph)SR_                                    | 2 | 787.843  | -0.56 |
| 699  | IPI00853158; | PRUNE2       | 1    | 1 | S | 0.0907378  | 74.039 | _RAS(ph)DSVFQPK_                                         | 2 | 607.782  | -0.55 |
| 4    | IPI00886748  | LOC100131880 | 1    | 1 | S | 8.09E-08   | 126.15 | _DRS(ph)HPR_                                             | 2 | 424.182  | -0.55 |
| 390  | IPI00464978  | IRS2         | 0.93 | 2 | S | 0.0248355  | 68.515 | _PVSVAGS(ph)PLS(ph)PGPVR_<br>_APSDS(ph)SLGTSPS(ph)DGRPEL | 2 | 790.368  | -0.55 |
| 304  | IPI00168849; | TRIP10       | 0.86 | 2 | S | 0.00065477 | 83.606 | R_                                                       | 2 | 1001.419 | -0.55 |
| 168  | IPI00007722; | AMPD2        | 1    | 1 | S | 0.0106111  | 77.654 | _QIS(ph)QDVKLEPDILLR_                                    | 3 | 616.327  | -0.54 |
| 304  | IPI00395337; | FIP1L1       | 1    | 1 | S | 0.0204923  | 111.83 | _AES(ph)PDLR_                                            | 2 | 434.184  | -0.54 |
| 9    | IPI00917683; | SUMO1        | 0.95 | 1 | S | 3.62E-42   | 205.38 | _(ac)SDQEAKPS(ph)TEDLGDKK_                               | 2 | 935.409  | -0.54 |
| 86   | IPI00889182  | LOC343052    | 1    | 1 | S | 0.204201   | 95.09  | _RSLPS(ph)R_                                             | 2 | 398.197  | -0.54 |
| 99   | IPI00873403; | RPL24        | 1    | 1 | T | 3.12E-17   | 156.57 | _AIT(ph)GASLADIMAK_<br>_ESPRPLQLPGAEGPAIS(ph)DGE         | 2 | 671.328  | -0.54 |
| 90   | IPI00185919  | LARP1        | 1    | 1 | S | 1.03E-08   | 93.737 | EGGGGEPGAGGGAAGAAGAGR_                                   | 3 | 1203.219 | -0.53 |
| 92   | IPI00400812; | SSFA2        | 0.99 | 1 | S | 0.00019984 | 101.13 | _TPLGAS(ph)LDEQSSSTLK_                                   | 2 | 857.401  | -0.53 |
| 833  | IPI00884054; | CBL          | 1    | 1 | S | 0.157002   | 68.258 | _RINS(ph)ER_                                             | 2 | 427.698  | -0.53 |

|      |              |              |      |   |   |            |        |                             |   |          |       |
|------|--------------|--------------|------|---|---|------------|--------|-----------------------------|---|----------|-------|
| 3716 | IPI00021812  | AHNAK        | 1    | 1 | T | 3.30E-25   | 167.35 | _VDIDT(ph)PDINIEGSEGK_      | 2 | 891.396  | -0.53 |
| 2260 | IPI00020356; | MAP1A        | 1    | 1 | S | 8.56E-11   | 128.36 | _NTSAEKELSSPIS(ph)PK_       | 2 | 834.398  | -0.53 |
| 18   | IPI00012199; | CCDC86       | 1    | 1 | S | 5.90E-06   | 106.48 | _LGGLRPES(ph)PESLTSVSR_     | 3 | 622.31   | -0.52 |
| 1579 | IPI00293845; | RIF1         | 1    | 1 | S | 0.00016546 | 97.936 | _SNES(ph)VDIQDQEEK_         | 2 | 800.822  | -0.52 |
| 657  | IPI00296485  | MAP1S        | 1    | 1 | S | 0.0204923  | 111.83 | _LSLS(ph)PLR_               | 2 | 433.231  | -0.52 |
| 420  | IPI00152007  | ARHGEF17     | 1    | 1 | S | 3.97E-06   | 127.93 | _SPS(ph)FGAGEGLLR_          | 2 | 635.795  | -0.52 |
| 1432 | IPI00513791; | DOCK7        | 1    | 1 | S | 4.12E-14   | 147.66 | _SPS(ph)GSAFGSQENLR_        | 2 | 758.825  | -0.52 |
| 176  | IPI00910363; | EML3         | 1    | 1 | S | 0.00102008 | 112.01 | _KAIS(ph)SANLLVR_           | 2 | 626.345  | -0.52 |
| 60   | IPI00419979  | PAK2         | 0.92 | 1 | T | 0.0587974  | 84.823 | _IISIFSGT(ph)EK_            | 2 | 587.791  | -0.51 |
| 1501 | IPI00008868  | MAP1B        | 1    | 1 | S | 7.20E-35   | 175.05 | _LGDVVS(ph)PTQIDVVSQFGSFK_  | 2 | 1002.969 | -0.51 |
| 782  | IPI00152510; | DDX54        | 1    | 1 | S | 1.79E-06   | 113.06 | _IDDRDS(ph)DEEGASDR_        | 2 | 830.31   | -0.5  |
| 346  | IPI00307162; | VCL          | 0.98 | 1 | S | 0.126598   | 58.94  | _GQGSS(ph)PVAMQK_           | 2 | 585.255  | -0.49 |
| 382  | IPI00298788; | ILF3         | 0.99 | 1 | S | 1.79E-06   | 113.06 | _RPM(ox)EEDGEKS(ph)PSK_     | 2 | 857.853  | -0.49 |
| 109  | IPI00873899; | ABCF1        | 0.99 | 1 | S | 4.81E-10   | 121.73 | _LSVPTS(ph)DEEDEVPAKPR_     | 3 | 682.652  | -0.49 |
| 56   | IPI00016670  | C11orf59     | 0.86 | 1 | S | 0.186767   | 50.855 | _TDEQALLSS(ph)ILAK_         | 2 | 734.868  | -0.48 |
| 2180 | IPI00333541; | FLNA         | 0.99 | 1 | S | 3.61E-21   | 156.33 | _IPEISIQDMTAQVTS(ph)PSGK_   | 2 | 1041.495 | -0.48 |
| 31   | IPI00021924  | H1FX         | 1    | 1 | S | 0.0542305  | 68.459 | _AGGSAALS(ph)PSK_           | 2 | 513.237  | -0.48 |
| 309  | IPI00783285; | DKFZp434H018 | 1    | 1 | S | 0.0587974  | 84.823 | _TYS(ph)DEANQMR_            | 2 | 647.742  | -0.48 |
| 117  | IPI00789101; | PTGES3       | 1    | 1 | S | 6.07E-45   | 216.1  | _DWEDDS(ph)DEDM(ox)SNFDR_   | 2 | 986.315  | -0.47 |
| 1389 | IPI00008868  | MAP1B        | 0.99 | 1 | S | 9.01E-26   | 156.33 | _ASVSPM(ox)DEVPDSES(ph)PI_  | 2 | 1055.45  | -0.47 |
| 192  | IPI00012512; | RRAS2        | 1    | 1 | S | 5.04E-08   | 117.38 | EK_                         | 2 | 1055.45  | -0.47 |
| 1977 | IPI00790503; | MYH10        | 1    | 1 | S | 5.64E-06   | 86.874 | _KFQEQECPSPS(ph)PEPTR_      | 2 | 955.411  | -0.46 |
| 4523 | IPI00020557  | LRP1         | 1    | 1 | S | 0.060343   | 108.14 | _QLHLEGASLELS(ph)DDDTESK_   | 2 | 1083.976 | -0.46 |
| 561  | IPI00008868  | MAP1B        | 1    | 1 | S | 6.63E-13   | 166.7  | _HSLAS(ph)TDEKR_            | 2 | 612.274  | -0.46 |
| 1009 | IPI00032064; | AKAP2        | 1    | 1 | S | 8.36E-21   | 110.71 | _KES(ph)KEETPEVTK_          | 2 | 742.848  | -0.46 |
| 60   | IPI00396015; | ACACA        | 0.98 | 1 | S | 2.13E-10   | 109.65 | _VKPPPS(ph)PTTEGPSLQPD LAP_ | 3 | 1059.194 | -0.45 |
| 62   | IPI00023860; | NAP1L1       | 1    | 1 | T | 4.24E-11   | 126.1  | EAAAGTQRPK_                 | 2 | 1138.023 | -0.45 |
| 177  | IPI00006079; | BCLAF1       | 1    | 1 | S | 1.15E-24   | 176.16 | _FIIGS(ph)VSEDNSEDEISNLVK_  | 2 | 1138.023 | -0.45 |
|      |              |              |      |   |   |            |        | _LDGLVET(ph)PTGYIESLPR_     | 2 | 970.474  | -0.45 |
|      |              |              |      |   |   |            |        | _KAEGEPQES(ph)PLK_          | 2 | 761.345  | -0.45 |

|      |              |          |      |   |   |            |        |                                        |   |          |       |
|------|--------------|----------|------|---|---|------------|--------|----------------------------------------|---|----------|-------|
| 2565 | IPI00065931; | AKAP13   | 0.82 | 1 | S | 1.78E-05   | 104.52 | _S(ph)LSRPSSLIEQEK_                    | 2 | 777.382  | -0.45 |
| 419  | IPI00418471  | VIM      | 0.97 | 1 | S | 0.132877   | 55.439 | _ISLPLPNFS(ph)SLNLR_                   | 2 | 825.934  | -0.45 |
| 110  | IPI00009505; | SNTB2    | 1    | 1 | S | 4.96E-13   | 156.57 | _GPAGEAGAS(ph)PPVRR_                   | 3 | 467.893  | -0.44 |
| 540  | IPI00783698; | TMEM87A  | 1    | 1 | S | 0.01841    | 57.797 | _WVEENVPSSVTDVALPALLDS(p<br>h)DEER_    | 3 | 950.774  | -0.44 |
| 440  | IPI00513791; | DOCK7    | 0.97 | 1 | S | 2.65E-09   | 159.29 | _RNSS(ph)IVGR_                         | 2 | 484.737  | -0.44 |
| 432  | IPI00178187; | EHBP1    | 0.88 | 2 | S | 0.019466   | 62.486 | _DLSTSPKPS(ph)PIPS(ph)PVLGR_           | 3 | 669.99   | -0.43 |
| 542  | IPI00909569; | HDAC7    | 0.86 | 1 | S | 1.89E-47   | 187.08 | _AQS(ph)SPAAPASLSAPEPASQ<br>AR_        | 2 | 1037.484 | -0.43 |
| 159  | IPI00013808; | ACTN4    | 1    | 1 | S | 0.00027174 | 102.36 | _FAIQDIS(ph)VEETSAK_                   | 2 | 809.374  | -0.43 |
| 502  | IPI00006379  | NOP58    | 1    | 1 | S | 0.00139359 | 63.49  | _HIKEEPLS(ph)EEEPCTSTAIASPE<br>K_      | 3 | 888.07   | -0.43 |
| 296  | IPI00218487; | GJA1     | 0.92 | 1 | S | 0.00081819 | 93.536 | _LVTGDRNNS(ph)SCR_                     | 2 | 729.811  | -0.43 |
| 28   | IPI00003394; | SMN1     | 0.89 | 2 | S | 0.105138   | 52.821 | _GTGQS(ph)DDS(ph)DIWDDTA<br>LIK_       | 2 | 1048.909 | -0.42 |
| 31   | IPI00003394; | SMN1     | 1    | 2 | S | 0.105138   | 52.821 | _GTGQS(ph)DDS(ph)DIWDDTA<br>LIK_       | 2 | 1048.909 | -0.42 |
| 656  | IPI00102752; | RBM15    | 0.91 | 1 | S | 0.0244908  | 74.039 | _HLDRS(ph)PESDRPR_                     | 3 | 515.57   | -0.42 |
| 636  | IPI00396171; | MAP4     | 1    | 1 | S | 0.00576649 | 92.082 | _KCS(ph)LPAAEDSVLEK_                   | 2 | 842.879  | -0.42 |
| 515  | IPI00397376; | ZC3H14   | 1    | 1 | S | 0.00081819 | 93.536 | _DLVQPKPAS(ph)PK_                      | 2 | 687.837  | -0.42 |
| 180  | IPI00376955  | PCTK2    | 1    | 1 | S | 0.0265948  | 78.538 | _RAS(ph)LSEIGFGK_                      | 2 | 622.805  | -0.42 |
| 114  | IPI00303867; | FAM176A  | 1    | 1 | S | 2.90E-16   | 178.44 | _NVFTS(ph)AEELER_                      | 2 | 687.8    | -0.42 |
| 220  | IPI00328293; | SRRM1    | 1    | 1 | T | 0.0121282  | 77.654 | _KEKT(ph)PELPEPSVK_                    | 3 | 521.267  | -0.42 |
| 612  | IPI00217683; | AKAP12   | 1    | 1 | S | 0.0265948  | 78.538 | _EGVTPWAS(ph)FKK_                      | 2 | 665.316  | -0.41 |
| 1984 | IPI00782992; | SRRM2    | 0.99 | 2 | S | 0.130392   | 114.35 | _S(ph)RT(ph)SPVTR_                     | 2 | 532.22   | -0.41 |
| 262  | IPI00026957; | WBP4     | 1    | 1 | S | 0.0906357  | 51.359 | _NKNSDGGGS(ph)DPETQKEK_                | 2 | 907.384  | -0.41 |
| 307  | IPI00396145; | PIKFYVE  | 1    | 1 | S | 0.00115368 | 100.32 | _SAS(ph)ITNLSLDR_                      | 2 | 628.798  | -0.41 |
| 92   | IPI00645192; | MECP2    | 0.97 | 1 | S | 0.00028446 | 79.087 | _AETSEGSGSAPAVPEASAS(ph)P<br>K_        | 2 | 1005.439 | -0.4  |
| 37   | IPI00384180  | YRDC     | 1    | 1 | S | 0.0255343  | 68.222 | _LFRPPS(ph)PAPAAPGAR_                  | 3 | 528.94   | -0.4  |
| 102  | IPI00004795  | CLNS1A   | 1    | 1 | S | 5.82E-11   | 85.62  | _FEEESKEPVADEEEEDS(ph)DDD<br>VEPITEFR_ | 3 | 1132.123 | -0.4  |
| 623  | IPI00029111; | LCRMP    | 0.82 | 1 | T | 7.59E-05   | 96.604 | _GM(ox)YDGPVFDLTTT(ph)PK_              | 2 | 869.376  | -0.39 |
| 703  | IPI00022164; | ARHGEF12 | 0.88 | 1 | T | 0.00105264 | 77.709 | _QVGETSAPGDTLDGT(ph)PR_                | 2 | 890.891  | -0.39 |



|      |              |         |      |   |   |            |        |                                                     |   |          |       |
|------|--------------|---------|------|---|---|------------|--------|-----------------------------------------------------|---|----------|-------|
| 241  | IPI00002538; | PDPK1   | 1    | 1 | S | 3.94E-08   | 105.09 | _ANS(ph)FVGTAQYVSPELLTEK_                           | 2 | 1067.509 | -0.39 |
| 181  | IPI00008557  | IGF2BP1 | 1    | 1 | S | 0.140787   | 54.649 | _QGS(ph)PVAAGAPAK_                                  | 2 | 567.271  | -0.39 |
| 402  | IPI00328293; | SRRM1   | 1    | 2 | S | 0.0555307  | 62.135 | _HRPS(ph)PPAT(ph)PPPK_                              | 3 | 481.218  | -0.39 |
| 406  | IPI00328293; | SRRM1   | 1    | 2 | T | 0.0555307  | 62.135 | _HRPS(ph)PPAT(ph)PPPK_<br>_LPS(ph)PTSPFSSLSQDQAATSK | 3 | 481.218  | -0.39 |
| 988  | IPI00409590; | LMO7    | 0.79 | 1 | S | 2.37E-06   | 100.39 | _                                                   | 2 | 1064.994 | -0.38 |
| 60   | IPI00299033  | KPNA3   | 1    | 1 | S | 7.48E-22   | 152.12 | _NVPQEESLEDS(ph)DVDADFK_                            | 2 | 1058.933 | -0.38 |
| 116  | IPI00397571; | NSFL1C  | 1    | 1 | S | 0.011655   | 78.538 | _KKS(ph)PNELVDDLFK_                                 | 3 | 538.271  | -0.38 |
| 1838 | IPI00020356; | MAP1A   | 1    | 1 | S | 0.00115368 | 100.32 | _M(ox)LEEKS(ph)PEKVK_<br>_(ac)S(ph)DNGELEDKPPAPPVR  | 2 | 707.338  | -0.38 |
| 2    | IPI00419979  | PAK2    | 1    | 1 | S | 0.0846301  | 51.98  | _                                                   | 2 | 921.917  | -0.38 |
| 208  | IPI00922194; | PCK1    | 0.97 | 1 | S | 1.06E-15   | 175.85 | _KIS(ph)TEDINK_                                     | 2 | 564.271  | -0.38 |
| 677  | IPI00004273; | RBM25   | 1    | 1 | S | 5.04E-08   | 117.38 | _LGASNS(ph)PGQPNSVKR_<br>_M(ox)GQAGS(ph)TIS(ph)NSHA | 2 | 796.383  | -0.37 |
| 328  | IPI00218487; | GJA1    | 0.76 | 2 | S | 1.80E-05   | 61.172 | QPFDPPDDNQNSK_                                      | 3 | 990.386  | -0.37 |
| 59   | IPI00186290; | EEF2    | 0.91 | 1 | T | 0.00115368 | 100.32 | _FTDT(ph)RKDEQER_                                   | 2 | 752.825  | -0.37 |
| 530  | IPI00419847; | SORBS3  | 0.89 | 1 | S | 0.0179652  | 68.222 | _LCDDGPQLPTS(ph)PR_                                 | 2 | 768.332  | -0.36 |
| 18   | IPI00008575; | KHDRBS1 | 0.78 | 1 | S | 7.27E-05   | 97.936 | _S(ph)GSM(ox)DPSGAHPSVR_                            | 2 | 740.798  | -0.36 |
| 279  | IPI00872944; | NUCKS1  | 1    | 1 | S | 2.82E-06   | 100.53 | _TPSPKEEDEEPES(ph)PPEKK_                            | 2 | 1066.967 | -0.36 |
| 1964 | IPI00641384; | SEC16A  | 1    | 1 | S | 0.00027534 | 78.282 | _LLPSAPQTLPDGPLAS(ph)PAR_                           | 2 | 991.011  | -0.36 |
| 189  | IPI00399265; | TPD52L2 | 1    | 1 | S | 1.33E-33   | 208.96 | _NSATFKS(ph)FEDR_                                   | 2 | 691.293  | -0.36 |
| 127  | IPI00168885; | DHX57   | 1    | 1 | S | 0.0121282  | 77.654 | _DLQEADADAGS(ph)ER_                                 | 2 | 757.294  | -0.36 |
| 706  | IPI00305064; | CD44    | 1    | 1 | S | 0.103489   | 69.555 | _S(ph)QEMVHLVNLK_                                   | 2 | 632.791  | -0.36 |
| 375  | IPI00760962; | KANK2   | 1    | 1 | S | 7.48E-05   | 106.79 | _ALAMPGRPES(ph)PPVFR_<br>_LSPHAFKTES(ph)GEETDLISPPQ | 2 | 852.918  | -0.36 |
| 298  | IPI00012545; | TGOLN2  | 0.77 | 1 | S | 0.00203184 | 51.049 | EEVK_<br>_GDS(ph)ETDLEALFNAVM(ox)N                  | 3 | 950.114  | -0.36 |
| 61   | IPI00216919; | YAP2    | 0.98 | 1 | S | 7.48E-22   | 152.12 | PK_                                                 | 3 | 682.962  | -0.36 |
| 327  | IPI00020513; | ZYX     | 1    | 1 | S | 5.56E-06   | 86.906 | _GPPASSPAPAPKFS(ph)PVTPK_                           | 2 | 956.982  | -0.35 |
| 462  | IPI00855856; | API5    | 0.99 | 1 | S | 3.34E-09   | 120.05 | _ASEDTTS(ph)GSPPKK_                                 | 2 | 692.803  | -0.35 |
| 39   | IPI00016910; | EIF3C   | 1    | 1 | S | 0.0170283  | 72.844 | _QPLLS(ph)EDEEDTKR_                                 | 2 | 876.906  | -0.35 |
| 1345 | IPI00290652; | RSF1    | 1    | 1 | S | 1.79E-06   | 113.06 | _IES(ph)DEEEDFENVGK_                                | 2 | 860.335  | -0.35 |

|      |              |         |      |   |   |            |        |                                            |   |          |       |
|------|--------------|---------|------|---|---|------------|--------|--------------------------------------------|---|----------|-------|
| 415  | IPI00385649; | LRCH3   | 1    | 1 | S | 0.0388423  | 65.53  | _RIS(ph)HEGSPVKPVAIR_                      | 4 | 432.234  | -0.35 |
| 2398 | IPI00782992  | SRRM2   | 1    | 1 | S | 1.52E-05   | 104.52 | _VSGRTS(ph)PPLDR_                          | 2 | 689.348  | -0.35 |
| 276  | IPI00873875; | SH3KBP1 | 1    | 1 | S | 0.0147628  | 73.06  | _S(ph)IEVENDFLPVEK_                        | 2 | 799.871  | -0.34 |
| 218  | IPI00021812  | AHNAK   | 0.87 | 1 | T | 7.20E-35   | 175.05 | _LPSGGAASPT(ph)GSAVDIR_                    | 2 | 861.907  | -0.34 |
| 394  | IPI00921916; | MRVI1   | 1    | 1 | S | 0.0168101  | 82.241 | _GLS(ph)WDSGPEEPGPR_                       | 2 | 782.327  | -0.34 |
| 2687 | IPI00020356; | MAP1A   | 0.99 | 1 | S | 5.28E-11   | 90.802 | _GELS(ph)PSFLNPPLPPSIDDR_                  | 2 | 1066.009 | -0.34 |
| 1164 | IPI00853400; | FKBP15  | 0.99 | 1 | S | 0.0588821  | 59.283 | _SSLS(ph)GDEEDELFK_                        | 2 | 768.311  | -0.34 |
| 1016 | IPI00910030; | PLEKHA5 | 0.78 | 1 | S | 0.172366   | 48.846 | _AKS(ph)PTPESTIASYVTLR_                    | 3 | 663.329  | -0.34 |
| 202  | IPI00218694; | CALD1   | 1    | 1 | S | 2.48E-16   | 153.28 | _RGS(ph)IGENQGEEK_                         | 2 | 692.299  | -0.34 |
| 226  | IPI00290204; | SNRNP70 | 1    | 1 | S | 1.85E-05   | 104.84 | _YDERPGPS(ph)PLPHR_                        | 3 | 534.247  | -0.33 |
| 282  | IPI00396171; | MAP4    | 0.93 | 1 | T | 7.27E-13   | 135.71 | _DMESPT(ph)KLDVTLAK_                       | 2 | 814.386  | -0.33 |
| 892  | IPI00908725; | ZC3H18  | 1    | 1 | S | 0.130392   | 114.35 | _LGS(ph)PKPER_                             | 2 | 482.237  | -0.32 |
| 438  | IPI00100980  | EHD2    | 1    | 1 | S | 3.83E-35   | 162.88 | _GPDEAMEDGEEGS(ph)DDEAE<br>WVVTK_          | 2 | 1287.989 | -0.32 |
| 351  | IPI00012545; | TGOLN2  | 0.9  | 1 | S | 0.0100785  | 84.823 | _MSGAS(ph)SENR_                            | 2 | 553.203  | -0.32 |
| 227  | IPI00179890; | G3BP2   | 0.76 | 1 | T | 1.38E-25   | 127.73 | _NLEELEEKSTT(ph)PPPAEPVSLP<br>QEPPK_       | 3 | 979.477  | -0.32 |
| 63   | IPI00013297  | PDAP1   | 1    | 2 | S | 2.30E-44   | 197.35 | _KSLDS(ph)DES(ph)EDEEDDYQ<br>QK_           | 2 | 1160.407 | -0.32 |
| 50   | IPI00444371; | WDR44   | 1    | 1 | S | 0.0265948  | 78.538 | _VGNES(ph)PVQELK_                          | 2 | 640.3    | -0.32 |
| 411  | IPI00307257; | TBC1D9B | 0.91 | 1 | S | 0.00053463 | 66.929 | _KAS(ph)VVDPSTESSPAPQEGSE<br>QPASPASPLSSR_ | 3 | 1087.503 | -0.32 |
| 14   | IPI00549725; | PGAM1   | 1    | 1 | S | 0.00102008 | 112.01 | _HGES(ph)AWNLENR_                          | 2 | 696.788  | -0.31 |
| 137  | IPI00001134; | RBM7    | 1    | 1 | S | 0.0582156  | 96.193 | _SFS(ph)SPENFQR_                           | 2 | 639.761  | -0.31 |
| 610  | IPI00021634; | KLC2    | 0.99 | 1 | S | 0.00115368 | 100.32 | _TLSSS(ph)SMDLSR_                          | 2 | 632.268  | -0.31 |
| 496  | IPI00006079; | BCLAF1  | 1    | 1 | S | 2.32E-05   | 147.5  | _KETQS(ph)PEQVK_                           | 2 | 627.292  | -0.31 |
| 652  | IPI00002349  | NUFIP2  | 1    | 1 | S | 0.060343   | 108.14 | _NDS(ph)WGSFDLR_                           | 2 | 638.753  | -0.3  |
| 63   | IPI00216919; | YAP2    | 0.99 | 1 | T | 7.48E-22   | 152.12 | _GDSET(ph)DLEALFNAVMPNK_                   | 2 | 1015.943 | -0.3  |
| 397  | IPI00385215; | NFATC4  | 1    | 1 | S | 4.05E-07   | 140.37 | _RTS(ph)SEQAVALPR_                         | 2 | 697.843  | -0.3  |
| 60   | IPI00013297  | PDAP1   | 1    | 2 | S | 2.30E-44   | 197.35 | _KSLDS(ph)DES(ph)EDEEDDYQ<br>QK_           | 2 | 1160.407 | -0.3  |
| 260  | IPI00328293; | SRRM1   | 1    | 1 | S | 4.15E-29   | 171.16 | _VPKPEPIPEPKEPS(ph)PEK_                    | 2 | 989.5    | -0.3  |
| 2056 | IPI00020356; | MAP1A   | 0.99 | 1 | S | 0.157463   | 51.98  | _VPSAPGQES(ph)PIPDPK_                      | 2 | 799.877  | -0.29 |
| 10   | IPI00419273  | CUL4A   | 1    | 1 | S | 8.69E-05   | 108.14 | _KGS(ph)FSALVGR_                           | 2 | 551.276  | -0.29 |

|      |              |              |      |   |   |            |        |                                                         |   |          |       |
|------|--------------|--------------|------|---|---|------------|--------|---------------------------------------------------------|---|----------|-------|
| 365  | IPI00008918; | LIMA1        | 1    | 1 | S | 1.48E-20   | 147.94 | _SEVQQPVHPKPLSPDS(ph)R_<br>_S(ph)RS(ph)RDS(ph)GDENEPI   | 2 | 990.981  | -0.29 |
| 1116 | IPI00856116; | PALLD        | 1    | 3 | S | 1.04E-16   | 141.14 | QER_                                                    | 3 | 705.591  | -0.29 |
| 79   | IPI00031556; | U2AF2        | 1    | 1 | S | 1.79E-06   | 113.06 | _GAKEEHGGLIRS(ph)PR_                                    | 2 | 793.894  | -0.29 |
| 289  | IPI00792743; | SLTM         | 1    | 1 | S | 7.48E-05   | 106.79 | _DGQDAIAQS(ph)PEK_                                      | 2 | 669.782  | -0.29 |
| 1468 | IPI00069817; | BAZ1B        | 1    | 1 | S | 5.19E-34   | 183.28 | _LAEDGEGDS(ph)EPEAVGQSR_<br>_DLSTSPKPS(ph)PIPS(ph)PVLGR | 2 | 934.881  | -0.29 |
| 436  | IPI00178187; | EHBP1        | 1    | 2 | S | 0.019466   | 62.486 | _                                                       | 3 | 669.99   | -0.29 |
| 1859 | IPI00301263; | CAD          | 1    | 1 | S | 7.48E-05   | 106.79 | _IHRAS(ph)DPGLPAEEPKEK_                                 | 2 | 977.475  | -0.29 |
| 1103 | IPI00782992; | SRRM2        | 0.8  | 2 | S | 0.0673629  | 63.588 | _S(ph)SS(ph)PVTELASR_<br>_SPEKIEEVLSPGGS(ph)PSKSPSK     | 2 | 647.26   | -0.29 |
| 677  | IPI00004408; | ADD3         | 0.75 | 1 | S | 4.24E-11   | 126.1  | _                                                       | 3 | 764.705  | -0.28 |
| 78   | IPI00025512; | HSPB1        | 1    | 2 | S | 1.51E-13   | 143.81 | _ALS(ph)RQLS(ph)SGVSEIR_                                | 2 | 831.884  | -0.28 |
| 1545 | IPI00855787; | TNKS1BP1     | 1    | 1 | S | 0.181464   | 117.35 | _RPS(ph)QGPPAR_                                         | 2 | 523.251  | -0.28 |
| 306  | IPI00412441; | WAPAL        | 0.99 | 1 | S | 1.52E-05   | 104.52 | _RPES(ph)PSEISPIK_                                      | 2 | 710.348  | -0.28 |
| 1329 | IPI00782992; | SRRM2        | 1    | 1 | S | 0.0465702  | 68.459 | _ENSFGS(ph)PLEFR_<br>_ERVPS(ph)VAEAPQLRPAGTAA           | 2 | 681.79   | -0.28 |
| 548  | IPI00760962; | KANK2        | 1    | 1 | S | 5.05E-06   | 87.39  | AK_                                                     | 2 | 1100.068 | -0.27 |
| 240  | IPI00000634; | CCDC6        | 1    | 2 | S | 0.0947455  | 55.439 | _LDQPVS(ph)APPS(ph)PR_                                  | 2 | 712.305  | -0.27 |
| 244  | IPI00000634; | CCDC6        | 1    | 2 | S | 0.0947455  | 55.439 | _LDQPVS(ph)APPS(ph)PR_                                  | 2 | 712.305  | -0.27 |
| 30   | IPI00784614; | Ov/Br septin | 1    | 1 | S | 3.12E-05   | 106.79 | _S(ph)FEVEEVETPNSTPPR_                                  | 2 | 949.414  | -0.27 |
| 1225 | IPI00917650; | FAM38A       | 0.97 | 1 | T | 0.0281936  | 130.93 | _T(ph)ASELLDDR_                                         | 2 | 627.316  | -0.27 |
| 79   | IPI00301907; | HLCS         | 1    | 1 | S | 0.00801416 | 86.822 | _RGS(ph)ASGSEPAGSDR_<br>_SAFTPATATGSSPS(ph)PVLGQG       | 2 | 764.805  | -0.27 |
| 904  | IPI00304740; | ITSN1        | 1    | 1 | S | 6.97E-21   | 138.07 | EK_                                                     | 2 | 1085.507 | -0.27 |
| 1843 | IPI00219299  | TLN2         | 1    | 1 | T | 0.0295307  | 120.67 | _LDEGT(ph)PPEPK_                                        | 2 | 581.755  | -0.27 |
| 133  | IPI00410039; | PPHLN1       | 1    | 1 | S | 0.0498288  | 63.588 | _DNTFFRES(ph)PVGR_<br>_(ac)M(ox)EDLDQSPLVSSSDS(p        | 2 | 752.833  | -0.27 |
| 15   | IPI00021766; | RTN4         | 0.94 | 1 | S | 1.22E-11   | 118.75 | h)PPRPQPAFK_                                            | 3 | 922.749  | -0.27 |
| 492  | IPI00479065  | GPSM1        | 0.88 | 1 | S | 0.0248355  | 68.515 | _APS(ph)SDEECFFDLLTK_                                   | 2 | 919.881  | -0.26 |
| 2047 | IPI00902614; | USP24        | 1    | 1 | S | 0.0265948  | 78.538 | _VSDQNS(ph)PVLPK_                                       | 2 | 632.303  | -0.26 |
| 409  | IPI00014219  | SNX17        | 1    | 1 | S | 0.181464   | 117.35 | _RSDS(ph)QQAVK_                                         | 2 | 549.751  | -0.26 |
| 284  | IPI00216746; | HNRNPK       | 1    | 1 | S | 0.0281936  | 130.93 | _DYDDM(ox)S(ph)PR_                                      | 2 | 547.678  | -0.26 |
| 401  | IPI00179438  | DAB2         | 1    | 1 | S | 0.00891055 | 83.047 | _SSPNPFVGS(ph)PPK_                                      | 2 | 647.297  | -0.26 |

|      |              |          |      |   |   |            |        |                                                     |   |          |       |
|------|--------------|----------|------|---|---|------------|--------|-----------------------------------------------------|---|----------|-------|
| 26   | IPI00922181; | MCM2     | 0.82 | 1 | S | 0.0163188  | 81.616 | _RGNDPLTS(ph)SPGR_                                  | 2 | 668.804  | -0.26 |
| 509  | IPI00012079; | EIF4B    | 0.99 | 1 | S | 5.19E-34   | 183.28 | _SQSSDTEQQS(ph)PTSGGGK_                             | 2 | 880.852  | -0.26 |
| 1459 | IPI00333541; | FLNA     | 1    | 1 | S | 1.52E-05   | 104.52 | _CSGPGLS(ph)PGMVR_                                  | 2 | 649.275  | -0.26 |
| 226  | IPI00171390; | PRPF38A  | 1    | 1 | S | 0.204201   | 95.09  | _RS(ph)PTLR_                                        | 2 | 405.205  | -0.26 |
| 136  | IPI00163505; | RBM39    | 1    | 1 | S | 0.0028276  | 72.24  | _DKS(ph)PVREPIDNLTPEER_                             | 3 | 692.332  | -0.26 |
| 302  | IPI00216047; | SMARCC2  | 0.83 | 2 | S | 1.18E-05   | 106.79 | _KRS(ph)PSPS(ph)PTPEAK_                             | 2 | 771.342  | -0.25 |
| 5448 | IPI00021812; | AHNAK    | 1    | 1 | S | 0.00576649 | 92.082 | _IS(ph)APNVDNFLEGPK_<br>_VSEEQTPPS(ph)PAGAGMST      | 2 | 790.871  | -0.25 |
| 153  | IPI00003443; | IFI16    | 1    | 1 | S | 2.31E-13   | 109.52 | AM(ox)GR_                                           | 2 | 1142.982 | -0.25 |
| 9    | IPI00152503; | DTX3L    | 1    | 1 | S | 0.00677202 | 85.182 | _(ac)ASHLRPPS(ph)PLLVR_<br>_NKPGPNIES(ph)GNEDDDASFK | 3 | 522.284  | -0.25 |
| 214  | IPI00299254  | EIF5B    | 1    | 1 | S | 3.18E-39   | 179.01 | _                                                   | 2 | 1057.439 | -0.25 |
| 387  | IPI00013788; | HTATSF1  | 0.99 | 1 | S | 0.060343   | 108.14 | _SDS(ph)VSASER_                                     | 2 | 509.198  | -0.25 |
| 1593 | IPI00409590; | LMO7     | 0.9  | 1 | S | 1.79E-06   | 113.06 | _SHS(ph)PSASQSGSQLR_                                | 2 | 754.828  | -0.25 |
| 649  | IPI00178187; | EHBP1    | 0.98 | 1 | S | 0.139938   | 63.85  | _RTKS(ph)DTEPQK_                                    | 2 | 635.295  | -0.25 |
| 194  | IPI00218035; | NFIC     | 0.99 | 1 | S | 0.00317762 | 89.162 | _ERDAEQSGS(ph)PR_                                   | 2 | 656.27   | -0.25 |
| 245  | IPI00412650; | SVIL     | 0.99 | 1 | S | 0.00891055 | 83.047 | _DSSFTEVPRS(ph)PK_                                  | 2 | 715.322  | -0.24 |
| 528  | IPI00023832; | SH3PX2B  | 1    | 1 | S | 0.00992869 | 88.185 | _KES(ph)IHK_                                        | 2 | 399.212  | -0.24 |
| 681  | IPI00004408; | ADD3     | 0.9  | 1 | S | 4.24E-11   | 126.1  | _IEEVLSPGSPSKS(ph)PSK_                              | 2 | 925.943  | -0.24 |
| 1694 | IPI00782992; | SRRM2    | 0.92 | 2 | S | 0.0753511  | 78.538 | _S(ph)SRSS(ph)PELTR_<br>_GLDS(ph)GAET(ph)EEEKDTWE   | 2 | 640.258  | -0.24 |
| 854  | IPI00020356; | MAP1A    | 1    | 2 | T | 3.27E-12   | 129.11 | EK_<br>_GLDS(ph)GAET(ph)EEEKDTWE                    | 2 | 1106.914 | -0.24 |
| 850  | IPI00020356; | MAP1A    | 1    | 2 | S | 3.27E-12   | 129.11 | EK_                                                 | 2 | 1106.914 | -0.24 |
| 101  | IPI00021812; | AHNAK    | 0.91 | 1 | T | 7.79E-10   | 124.18 | _KGDRSPEPGQTWT(ph)R_                                | 2 | 847.886  | -0.24 |
| 2152 | IPI00333541; | FLNA     | 1    | 1 | S | 1.22E-07   | 115.7  | _RAPS(ph)VANVGSCHDLSLK_                             | 3 | 630.968  | -0.24 |
| 221  | IPI00855787; | TNKS1BP1 | 1    | 1 | S | 0.00020617 | 145.18 | _GWS(ph)QEGPVK_                                     | 2 | 534.232  | -0.23 |
| 292  | IPI00218694; | CALD1    | 0.92 | 1 | T | 1.42E-17   | 141.14 | _ASVDT(ph)KEAEGAPQVEAGK_                            | 2 | 933.928  | -0.23 |
| 246  | IPI00409590; | LMO7     | 1    | 1 | S | 1.95E-25   | 186.01 | _REDS(ph)FESLDSLGR_                                 | 2 | 839.359  | -0.23 |
| 166  | IPI00873899; | ABCF1    | 1    | 1 | S | 0.00115368 | 100.32 | _AVS(ph)EEQQPALK_<br>_SRTS(ph)VQTEDDQLIAGQSAR       | 2 | 640.3    | -0.23 |
| 655  | IPI00473136; | CTNNA1   | 0.94 | 1 | S | 8.11E-52   | 202.91 | _                                                   | 2 | 1071.495 | -0.23 |
| 1286 | IPI00022164; | ARHGEF12 | 0.84 | 1 | T | 4.41E-30   | 163.43 | _T(ph)ASQGPQTDSVIQNSENIK_                           | 2 | 1048.978 | -0.22 |

|      |              |          |      |   |   |            |        |                                                      |   |          |       |
|------|--------------|----------|------|---|---|------------|--------|------------------------------------------------------|---|----------|-------|
| 208  | IPI00304692; | RBMX     | 1    | 1 | S | 0.0204923  | 111.83 | _DVYLS(ph)PR_<br>_QAS(ph)TDAGTAGALTPQHVR             | 2 | 465.21   | -0.22 |
| 109  | IPI00216919; | YAP2     | 0.9  | 1 | S | 2.38E-06   | 101.13 | _                                                    | 3 | 620.958  | -0.22 |
| 83   | IPI00021831; | PRKAR1A  | 1    | 1 | S | 1.61E-29   | 163.43 | _TDSREDEIS(ph)PPPPNPVVK_<br>_AAEAGGAEEQYGFLTT(ph)PTK | 2 | 1028.983 | -0.22 |
| 1067 | IPI00008868  | MAP1B    | 0.9  | 1 | T | 1.06E-21   | 146.92 | _                                                    | 2 | 1010.949 | -0.21 |
| 114  | IPI00008998  | PTPLAD1  | 1    | 1 | S | 8.98E-06   | 115.98 | _WLDES(ph)DAEMELR_                                   | 2 | 787.316  | -0.21 |
| 277  | IPI00013721  | PRPF4B   | 1    | 1 | S | 0.0907378  | 74.039 | _KKS(ph)PIINESR_                                     | 3 | 417.887  | -0.21 |
| 326  | IPI00465457; | CCNY     | 0.98 | 1 | S | 0.00045484 | 124.22 | _SAS(ph)ADNLTLPR_                                    | 2 | 612.785  | -0.21 |
| 398  | IPI00170934; | STK11IP  | 0.99 | 1 | S | 7.48E-05   | 106.79 | _RAS(ph)ISEPSDTPDPEPR_                               | 2 | 868.878  | -0.2  |
| 2    | IPI00023526; | RAB6A    | 0.75 | 1 | S | 0.0302023  | 68.459 | _(ac)S(ph)TGGDFGNPLRK_                               | 2 | 685.809  | -0.2  |
| 687  | IPI00006298; | PPIG     | 0.96 | 1 | S | 0.00115368 | 100.32 | _ADRDQS(ph)PFSK_                                     | 2 | 615.761  | -0.2  |
| 410  | IPI00000015  | SFRS4    | 0.76 | 1 | S | 0.189231   | 59.232 | _S(ph)VSKEREHAK_                                     | 2 | 625.798  | -0.2  |
| 106  | IPI00003443; | IFI16    | 0.84 | 1 | S | 0.11493    | 48.846 | _EVDATS(ph)PAPSTSSTVK_                               | 2 | 828.872  | -0.19 |
| 19   | IPI00027152; | CENPA    | 0.88 | 2 | S | 0.0157988  | 76.343 | _RRSPS(ph)PTPTGPS(ph)R_                              | 2 | 826.869  | -0.19 |
| 27   | IPI00027152; | CENPA    | 0.97 | 2 | S | 0.0157988  | 76.343 | _RRSPS(ph)PTPTGPS(ph)R_                              | 2 | 826.869  | -0.19 |
| 274  | IPI00856098; | RRBP1    | 0.93 | 1 | T | 0.0582156  | 96.193 | _KVDT(ph)TPNQGK_                                     | 2 | 584.274  | -0.19 |
| 708  | IPI00328293; | SRRM1    | 0.99 | 1 | S | 0.00081819 | 93.536 | _APQTSSS(ph)PPPVR_                                   | 2 | 652.306  | -0.19 |
| 3468 | IPI00289776; | MYCBP2   | 1    | 1 | S | 0.198183   | 48.095 | _VNS(ph)GDTEVGSSLLR_<br>_RPNEDS(ph)DEDEEKGAVVPPV     | 2 | 757.348  | -0.18 |
| 691  | IPI00015195  | CSTF3    | 1    | 1 | S | 0.0780624  | 37.346 | HDIYR_<br>_GWLDRDPSAS(ph)PGDAGEQAIR                  | 4 | 712.321  | -0.18 |
| 290  | IPI00307162; | VCL      | 1    | 1 | S | 8.56E-11   | 128.36 | _                                                    | 3 | 688.316  | -0.18 |
| 429  | IPI00855787; | TNKS1BP1 | 1    | 1 | S | 8.89E-64   | 232.58 | _RFS(ph)EGVLQSPSQDQEK_<br>_KLS(ph)GDQITLPTTVDYSSVPK  | 2 | 957.933  | -0.18 |
| 36   | IPI00477518; | PDAF     | 1    | 1 | S | 2.11E-05   | 82.838 | _                                                    | 2 | 1115.056 | -0.18 |
| 348  | IPI00013455; | CLIP1    | 0.96 | 1 | S | 0.0101915  | 82.295 | _KIS(ph)GTTALQEALKEK_                                | 3 | 566.301  | -0.18 |
| 1907 | IPI00179298; | HUWE1    | 1    | 1 | S | 1.79E-06   | 113.06 | _GGTAS(ph)DDEFENLR_                                  | 2 | 789.309  | -0.18 |
| 1124 | IPI00782992; | SRRM2    | 1    | 1 | S | 0.0582156  | 96.193 | _GEFSAS(ph)PMLK_                                     | 2 | 573.749  | -0.18 |
| 110  | IPI00329547; | ZC3H13   | 0.91 | 1 | S | 0.00317762 | 89.162 | _NTEESSS(ph)PVRK_                                    | 2 | 657.29   | -0.17 |
| 261  | IPI00902584; | VASP     | 1    | 1 | S | 7.80E-22   | 155.4  | _KVS(ph)KQEEASGGPTAPK_                               | 2 | 847.411  | -0.17 |
| 138  | IPI00251559  | RNF20    | 1    | 1 | S | 2.04E-25   | 159.38 | _ALVVPEPEPDSDS(ph)NQER_                              | 2 | 981.428  | -0.17 |

|      |              |          |      |   |   |            |        |                                                     |   |          |       |
|------|--------------|----------|------|---|---|------------|--------|-----------------------------------------------------|---|----------|-------|
| 127  | IPI00216919; | YAP2     | 0.79 | 1 | S | 1.86E-17   | 110.06 | _AHS(ph)SPASLQLGAVSPGTLTP<br>TGVVSGPAATPTAQHLR_     | 3 | 1205.616 | -0.17 |
| 1102 | IPI00782992; | SRRM2    | 0.85 | 2 | S | 0.0673629  | 63.588 | _SS(ph)S(ph)PVTELASR_<br>_VVEAVNS(ph)DS(ph)DSEFGIPK | 2 | 647.26   | -0.17 |
| 1522 | IPI00027280; | TOP2B    | 1    | 2 | S | 5.16E-05   | 98.917 | _                                                   | 2 | 976.9    | -0.17 |
| 152  | IPI00100674; | REEP4    | 0.98 | 1 | S | 0.0071244  | 88.268 | _SFS(ph)MQDLR_<br>_RTS(ph)M(ox)GGTQQQFVEGV          | 2 | 532.218  | -0.17 |
| 552  | IPI00017292; | CTNNB1   | 0.99 | 1 | S | 3.30E-25   | 167.35 | R_                                                  | 2 | 938.922  | -0.17 |
| 2342 | IPI00020356; | MAP1A    | 0.9  | 1 | S | 9.69E-67   | 243.15 | _SHWDDS(ph)TSDSELEK_                                | 2 | 858.325  | -0.17 |
| 243  | IPI00792065; | TOR1AIP1 | 0.82 | 1 | S | 0.0588821  | 59.283 | _SRDS(ph)DESGDKTTR_                                 | 2 | 767.312  | -0.16 |
| 66   | IPI00789041  | PNN      | 0.99 | 1 | S | 3.34E-09   | 120.05 | _RGFS(ph)DSGGPPAK_<br>_M(ox)LAES(ph)DES(ph)GDEES    | 2 | 656.788  | -0.16 |
| 193  | IPI00024971  | OSBP     | 1    | 2 | S | 2.83E-11   | 93.189 | VSQTDKTELQNTLR_<br>_M(ox)LAES(ph)DES(ph)GDEES       | 3 | 1063.434 | -0.16 |
| 190  | IPI00024971  | OSBP     | 1    | 2 | S | 2.83E-11   | 93.189 | VSQTDKTELQNTLR_                                     | 3 | 1063.434 | -0.16 |
| 1418 | IPI00856045; | AHNAK2   | 1    | 1 | S | 0.0719115  | 72.206 | _LQM(ox)PS(ph)FK_                                   | 2 | 473.709  | -0.16 |
| 371  | IPI00654569; | CAMK2D   | 0.99 | 1 | T | 0.00019984 | 101.13 | _ESTESSNTT(ph)IEDEDVK_                              | 2 | 932.373  | -0.15 |
| 512  | IPI00006079; | BCLAF1   | 1    | 1 | S | 0.00035686 | 97.936 | _LKDLFDYS(ph)PPLHK_<br>_SLPAPVAQRPDS(ph)PGGGLQA     | 2 | 826.908  | -0.15 |
| 108  | IPI00018583; | HABP4    | 1    | 1 | S | 0.00301862 | 56.22  | PGQK_                                               | 3 | 770.053  | -0.15 |
| 267  | IPI00000015  | SFRS4    | 0.97 | 1 | S | 0.103489   | 69.555 | _S(ph)KSKDQAEK_                                     | 2 | 615.274  | -0.15 |
| 886  | IPI00328293; | SRRM1    | 0.95 | 1 | S | 3.62E-42   | 205.38 | _KETES(ph)EAEDNLDDLEK_                              | 2 | 972.902  | -0.15 |
| 440  | IPI00641770; | PI4KB    | 1    | 1 | S | 0.00457914 | 92.082 | _S(ph)VENLPECGITHEQR_                               | 2 | 924.901  | -0.15 |
| 832  | IPI00178072; | CYTSA    | 0.98 | 1 | S | 0.00462082 | 87.563 | _RSS(ph)TSSEPTPVK_                                  | 2 | 728.838  | -0.15 |
| 130  | IPI00550368; | TENC1    | 1    | 1 | S | 0.0587974  | 84.823 | _SFS(ph)LDPLM(ox)ER_                                | 2 | 645.775  | -0.15 |
| 551  | IPI00017292; | CTNNB1   | 0.79 | 1 | T | 3.30E-25   | 167.35 | _RT(ph)SMGGTQQQFVEGVR_                              | 3 | 620.952  | -0.15 |
| 226  | IPI00385449; | PRKCA    | 0.98 | 1 | S | 0.0170283  | 72.844 | _STLNPQWNES(ph)FTFK_                                | 2 | 889.893  | -0.15 |
| 112  | IPI00306840  | SGPP1    | 0.91 | 1 | S | 0.00462082 | 87.563 | _RNS(ph)LTGEEGQLAR_<br>_DLSTS(ph)PKPSPIPS(ph)PVLGR  | 2 | 755.854  | -0.14 |
| 428  | IPI00178187; | EHBP1    | 0.78 | 2 | S | 0.019466   | 62.486 | _                                                   | 2 | 1004.481 | -0.14 |
| 209  | IPI00171390; | PRPF38A  | 1    | 1 | S | 0.0204923  | 111.83 | _VPS(ph)PDHR_                                       | 2 | 444.192  | -0.14 |
| 617  | IPI00216219; | TJP1     | 1    | 1 | S | 0.00870141 | 83.047 | _S(ph)REDLSAQPVQTK_                                 | 2 | 769.864  | -0.14 |
| 58   | IPI00465028; | TPI1     | 1    | 1 | S | 5.04E-08   | 117.38 | _KQS(ph)LGELIGTLNAK_                                | 2 | 811.929  | -0.14 |
| 119  | IPI00023640  | PDCD5    | 1    | 1 | S | 0.00081819 | 93.536 | _RKVM(ox)DS(ph)DEDDDY_                              | 2 | 792.282  | -0.14 |

|      |              |           |      |   |   |           |        |                                                      |   |          |       |
|------|--------------|-----------|------|---|---|-----------|--------|------------------------------------------------------|---|----------|-------|
| 1237 | IPI00411452; | DOCK11    | 0.78 | 1 | S | 0.0602528 | 42.561 | _EDS(ph)RGLIPEGATGFPDQG<br>NTGENTR_                  | 3 | 929.074  | -0.13 |
| 359  | IPI00641364; | PPAN      | 1    | 1 | S | 0.0170283 | 72.844 | _VGGG(ph)DEEASGIPSR_                                 | 2 | 720.804  | -0.13 |
| 61   | IPI00874030  | HNRNPA2B1 | 1    | 1 | S | 0.175309  | 44.424 | _S(ph)AAGNRAEATESAMER_<br>_IVEPEVVGES(ph)DS(ph)EVEGD | 2 | 865.862  | -0.13 |
| 116  | IPI00022790  | MFAP1     | 1    | 2 | S | 3.24E-36  | 173.53 | AWR_<br>_IVEPEVVGES(ph)DS(ph)EVEGD                   | 2 | 1181.48  | -0.13 |
| 118  | IPI00022790  | MFAP1     | 1    | 2 | S | 3.24E-36  | 173.53 | AWR_                                                 | 2 | 1181.48  | -0.13 |
| 514  | IPI00470779  | TXLNA     | 0.93 | 1 | S | 7.79E-10  | 124.18 | _RPEGPGAQAPS(ph)SPR_                                 | 2 | 743.844  | -0.13 |
| 957  | IPI00550733; | TBC1D2B   | 1    | 1 | S | 1.48E-20  | 147.94 | _DTSPDKGELVS(ph)DEEEDT_                              | 2 | 973.375  | -0.13 |
| 164  | IPI00299254  | EIF5B     | 1    | 1 | S | 9.13E-10  | 153.28 | _WDGS(ph)EEDEDNSK_                                   | 2 | 745.751  | -0.13 |
| 1061 | IPI00742743; | TP53BP1   | 0.99 | 1 | T | 0.0907378 | 74.039 | _SEDPPTT(ph)PIR_<br>_VQEHEDS(ph)GDS(ph)EVENEA        | 2 | 596.766  | -0.13 |
| 138  | IPI00000733  | UTP18     | 1    | 2 | S | 1.57E-20  | 147.61 | K_<br>_VQEHEDS(ph)GDS(ph)EVENEA                      | 2 | 1031.37  | -0.13 |
| 141  | IPI00000733  | UTP18     | 1    | 2 | S | 1.57E-20  | 147.61 | K_<br>_GGEFDEFVNDTDT(ph)DDDLPI                       | 2 | 1031.37  | -0.13 |
| 925  | IPI00477468  | CTR9      | 1    | 1 | T | 3.18E-12  | 119.22 | K_                                                   | 2 | 1154.463 | -0.13 |
| 55   | IPI00418471  | VIM       | 0.78 | 1 | S | 5.99E-17  | 160.03 | _SLYAS(ph)SPGGVYATR_                                 | 2 | 754.843  | -0.13 |
| 1359 | IPI00240812; | PDS5B     | 0.98 | 1 | S | 5.97E-08  | 110.18 | _AES(ph)PESSAESTQSTPQK_                              | 2 | 978.925  | -0.13 |
| 16   | IPI00908768; | HSPB6     | 1    | 1 | S | 5.99E-17  | 160.03 | _RAS(ph)APLPLGSAPGR_                                 | 2 | 715.369  | -0.12 |
| 276  | IPI00015838  | LYAR      | 0.99 | 1 | S | 0.0582156 | 96.193 | _RHS(ph)EVETDSK_                                     | 3 | 423.182  | -0.12 |
| 335  | IPI00549766; | FAM40A    | 0.99 | 1 | S | 1.48E-20  | 147.94 | _AAS(ph)PPASASDLIEQQQK_<br>_KAEDS(ph)DS(ph)EPEPEDNVR | 2 | 910.925  | -0.12 |
| 499  | IPI00100151; | XRN2      | 1    | 2 | S | 2.92E-34  | 192.74 | _KAEDS(ph)DS(ph)EPEPEDNVR                            | 2 | 988.862  | -0.12 |
| 501  | IPI00100151; | XRN2      | 1    | 2 | S | 2.92E-34  | 192.74 | _                                                    | 2 | 988.862  | -0.12 |
| 211  | IPI00012340  | SFRS9     | 1    | 1 | S | 0.0498288 | 63.588 | _GS(ph)PHYFSPFRPY_                                   | 2 | 767.829  | -0.11 |
| 232  | IPI00012442  | G3BP1     | 0.84 | 1 | S | 1.13E-41  | 195.04 | _SSS(ph)PAPADIAQTVQEDLR_                             | 2 | 982.952  | -0.11 |
| 18   | IPI00011689  | EEF2K     | 1    | 1 | S | 5.67E-06  | 112.01 | _LEGVDGGQS(ph)PR_                                    | 2 | 597.761  | -0.11 |
| 2233 | IPI00178352; | FLNC      | 1    | 1 | S | 0.181464  | 117.35 | _LGS(ph)FGSITR_                                      | 2 | 509.242  | -0.11 |
| 518  | IPI00449909; | ARHGEF7   | 1    | 1 | S | 0.181464  | 117.35 | _M(ox)S(ph)GFIYQGK_                                  | 2 | 563.736  | -0.11 |
| 30   | IPI00299667  | VAMP4     | 1    | 1 | S | 3.32E-34  | 192.34 | _NLLEDDS(ph)DEEEDFFLR_                               | 2 | 1033.417 | -0.11 |
| 181  | IPI00514127; | HDGF      | 1    | 1 | S | 0.0295307 | 120.67 | _AGDLLEDS(ph)PKRPK_                                  | 2 | 753.372  | -0.11 |

|      |              |         |      |   |   |            |        |                                                        |   |          |       |
|------|--------------|---------|------|---|---|------------|--------|--------------------------------------------------------|---|----------|-------|
| 414  | IPI00021405; | LMNA    | 1    | 1 | S | 1.61E-29   | 163.43 | _ASSHSSQTQGGGS(ph)VTK_<br>_SHVEDGDIAGAPASS(ph)PEAP     | 2 | 799.844  | -0.1  |
| 1407 | IPI00856098; | RRBP1   | 0.84 | 1 | S | 2.69E-08   | 75.009 | PAEQDPVQLK_                                            | 3 | 998.124  | -0.1  |
| 119  | IPI00329599  | PHLDA3  | 0.78 | 1 | S | 0.140787   | 54.649 | _ARQS(ph)LGTGTLVS_                                     | 2 | 635.314  | -0.1  |
| 1457 | IPI00005707; | MRC2    | 0.99 | 1 | S | 0.00045484 | 124.22 | _SSS(ph)SPTEATEK_                                      | 2 | 602.242  | -0.1  |
| 1510 | IPI00409590; | LMO7    | 1    | 1 | S | 9.38E-39   | 210    | _RGES(ph)LDNLDSPR_                                     | 2 | 719.82   | -0.1  |
| 461  | IPI00328293; | SRRM1   | 0.93 | 1 | S | 7.79E-10   | 124.18 | _KVELS(ph)ESEEDKGGK_                                   | 2 | 807.867  | -0.1  |
| 8    | IPI00019548; | SMAD2   | 1    | 1 | T | 0.00891055 | 83.047 | _(ac)SSILPFT(ph)PPVVK_                                 | 2 | 703.87   | -0.1  |
| 385  | IPI00742743; | TP53BP1 | 0.89 | 1 | S | 0.0121891  | 70.232 | _STPFIVPSS(ph)PTEQEGR_                                 | 2 | 906.414  | -0.1  |
| 93   | IPI00021812; | AHNAK   | 1    | 1 | S | 7.79E-10   | 124.18 | _KGDERS(ph)PEPGQTWTR_<br>_VEAKES(ph)EES(ph)DEDMGF      | 3 | 565.593  | -0.1  |
| 304  | IPI00008530; | RPLP0   | 1    | 2 | S | 1.68E-45   | 182.31 | GLFD_<br>_VEAKES(ph)EES(ph)DEDMGF                      | 2 | 1211.932 | -0.1  |
| 307  | IPI00008530; | RPLP0   | 1    | 2 | S | 1.68E-45   | 182.31 | GLFD_                                                  | 2 | 1211.932 | -0.1  |
| 379  | IPI00104050  | THRAP3  | 1    | 1 | S | 0.00081819 | 93.536 | _GSFS(ph)DTGLGDGK_                                     | 2 | 610.745  | -0.09 |
| 499  | IPI00642971; | EEF1D   | 1    | 1 | S | 0.00035686 | 97.936 | _ATAPQTHVS(ph)PM(ox)R_                                 | 2 | 760.34   | -0.09 |
| 95   | IPI00009505; | SNTB2   | 1    | 1 | S | 0.00081819 | 93.536 | _GLGPPS(ph)PPAPPR_                                     | 2 | 611.803  | -0.09 |
| 12   | IPI00220158; | ADD1    | 0.92 | 1 | S | 0.0738263  | 60.018 | _AAVVT(ph)PPPTTAPHK_                                   | 2 | 777.39   | -0.09 |
| 126  | IPI00872944; | NUCKS1  | 1    | 2 | S | 5.04E-28   | 186.2  | _NSQEDS(ph)EDS(ph)EDKDVK_                              | 2 | 942.825  | -0.09 |
| 562  | IPI00464978  | IRS2    | 1    | 1 | S | 4.05E-07   | 140.37 | _RVS(ph)GDAAQDLDR_                                     | 2 | 691.807  | -0.09 |
| 1797 | IPI00008868  | MAP1B   | 0.98 | 1 | S | 2.82E-06   | 100.53 | _ESSPLYS(ph)PTFSDSTSAVK_                               | 2 | 991.935  | -0.08 |
| 315  | IPI00100731  | SH2D4A  | 1    | 1 | S | 4.71E-18   | 180.61 | _TLS(ph)SSAQEDIIR_                                     | 2 | 700.327  | -0.08 |
| 14   | IPI00006725; | DDX23   | 1    | 1 | S | 0.00102008 | 112.01 | _DRDAS(ph)PSKEER_<br>_DM(ox)DEPS(ph)PVPNVEEVTL         | 3 | 457.196  | -0.08 |
| 347  | IPI00216047; | SMARCC2 | 1    | 1 | S | 1.24E-05   | 91.235 | PK_                                                    | 2 | 1046.463 | -0.08 |
| 67   | IPI00604620; | NCL     | 1    | 1 | S | 0.012792   | 128.52 | _KVVVS(ph)PTK_                                         | 2 | 469.26   | -0.08 |
| 641  | IPI00473136; | CTNNA1  | 1    | 1 | S | 1.49E-44   | 199.27 | _TPEELDDS(ph)DFETEDFDVR_<br>_SPFEIIS(ph)PPAS(ph)PPEMVG | 2 | 1119.934 | -0.08 |
| 2035 | IPI00020356; | MAP1A   | 1    | 2 | S | 1.76E-09   | 114.2  | QR_<br>_SPFEIIS(ph)PPAS(ph)PPEMVG                      | 2 | 1099.983 | -0.07 |
| 2039 | IPI00020356; | MAP1A   | 1    | 2 | S | 1.76E-09   | 114.2  | QR_                                                    | 2 | 1099.983 | -0.07 |
| 5110 | IPI00021812; | AHNAK   | 1    | 1 | S | 2.90E-16   | 178.44 | _FKAEAPLPS(ph)PK_                                      | 2 | 632.821  | -0.07 |
| 646  | IPI00006675; | ABCC4   | 0.99 | 1 | T | 1.22E-07   | 115.7  | _DNEESEQPPVPGT(ph)PTLR_                                | 2 | 973.431  | -0.07 |



|      |              |          |      |   |   |            |        |                                                                                                                                                                                                                                                                                                                                                                                                                                                                                                                                                                                                                                                                                    |   |          |       |
|------|--------------|----------|------|---|---|------------|--------|------------------------------------------------------------------------------------------------------------------------------------------------------------------------------------------------------------------------------------------------------------------------------------------------------------------------------------------------------------------------------------------------------------------------------------------------------------------------------------------------------------------------------------------------------------------------------------------------------------------------------------------------------------------------------------|---|----------|-------|
| 449  | IPI00464952; | SFRS11   | 1    | 1 | S | 0.00020617 | 145.18 | _KPIETGS(ph)PK_<br>_VPPPRS(ph)PQAQEAPVNIDEG                                                                                                                                                                                                                                                                                                                                                                                                                                                                                                                                                                                                                                        | 2 | 518.757  | -0.07 |
| 1307 | IPI00020356; | MAP1A    | 1    | 1 | S | 3.45E-08   | 85.077 | LTGCTIQLLPAQDK_<br>_(ac)S(ph)GDEM(ox)IFDPTM(ox)                                                                                                                                                                                                                                                                                                                                                                                                                                                                                                                                                                                                                                    | 3 | 1207.266 | -0.07 |
| 2    | IPI00021728; | EIF2S2   | 1    | 1 | S | 0.0147628  | 73.06  | )SK_<br>_TLS(ph)M(ox)IEEEIR_<br>_AM(ox)ADELS(ph)EK_<br>_SQS(ph)SDTEQQSPTSGGGK_<br>_KVVVSPT(ph)KK_<br>_SQSS(ph)DTEQQS(ph)PTSGGGK_<br>K_<br>_SES(ph)PKEPEQLR_<br>_DIS(ph)PSTFR_<br>_NSASATTPLS(ph)GNSSR_<br>_QVAEQGDLS(ph)PAANR_<br>_GLLYDS(ph)DEEDEERPAR_<br>_T(ph)WQM(ox)NLPLMS(ph)<br>WK_<br>_LQAKES(ph)PQR_<br>_DKGQKS(ph)PAEQK_<br>_DIDISS(ph)PEFK_<br>_(ac)SETAPAETATPAPVEKS(ph)<br>PAK_<br>_YNDWS(ph)DDDDDSNESK_<br>_RDS(ph)QDGSSYR_<br>_GISS(ph)LPR_<br>_VADAKGDS(ph)ES(ph)EEDEDL<br>EVPVPSR_<br>_VADAKGDS(ph)ES(ph)EEDEDL<br>EVPVPSR_<br>_DEILPTT(ph)PISEQK_<br>_ETPHS(ph)PGVEDAPIAK_<br>_KES(ph)ES(ph)EDS(ph)S(ph)D<br>DEPLIKK_<br>_KES(ph)ES(ph)EDS(ph)S(ph)D<br>DEPLIKK_ | 2 | 806.301  | -0.07 |
| 951  | IPI00032064; | AKAP2    | 1    | 1 | S | 0.00485455 | 133.79 |                                                                                                                                                                                                                                                                                                                                                                                                                                                                                                                                                                                                                                                                                    | 2 | 658.794  | -0.07 |
| 37   | IPI00009236; | CAV1     | 1    | 1 | S | 7.13E-06   | 105.65 |                                                                                                                                                                                                                                                                                                                                                                                                                                                                                                                                                                                                                                                                                    | 2 | 545.212  | -0.07 |
| 502  | IPI00012079; | EIF4B    | 0.92 | 1 | S | 5.19E-34   | 183.28 |                                                                                                                                                                                                                                                                                                                                                                                                                                                                                                                                                                                                                                                                                    | 2 | 880.852  | -0.07 |
| 69   | IPI00604620; | NCL      | 0.5  | 1 | T | 0.012792   | 128.52 |                                                                                                                                                                                                                                                                                                                                                                                                                                                                                                                                                                                                                                                                                    | 2 | 533.307  | -0.07 |
| 503  | IPI00012079; | EIF4B    | 0.97 | 2 | S | 5.19E-34   | 183.28 |                                                                                                                                                                                                                                                                                                                                                                                                                                                                                                                                                                                                                                                                                    | 2 | 920.835  | -0.07 |
| 6    | IPI00215965; | HNRNPA1  | 1    | 1 | S | 0.00115368 | 100.32 |                                                                                                                                                                                                                                                                                                                                                                                                                                                                                                                                                                                                                                                                                    | 3 | 460.545  | -0.07 |
| 682  | IPI00104050  | THRAP3   | 1    | 1 | S | 2.32E-05   | 147.5  |                                                                                                                                                                                                                                                                                                                                                                                                                                                                                                                                                                                                                                                                                    | 2 | 558.26   | -0.06 |
| 320  | IPI00007277; | LRRFIP2  | 0.86 | 1 | S | 0.010615   | 77.455 |                                                                                                                                                                                                                                                                                                                                                                                                                                                                                                                                                                                                                                                                                    | 2 | 765.333  | -0.06 |
| 438  | IPI00304742  | STK10    | 1    | 1 | S | 0.00801416 | 86.822 |                                                                                                                                                                                                                                                                                                                                                                                                                                                                                                                                                                                                                                                                                    | 2 | 796.857  | -0.06 |
| 120  | IPI00922181; | MCM2     | 1    | 1 | S | 0.00737446 | 73.116 |                                                                                                                                                                                                                                                                                                                                                                                                                                                                                                                                                                                                                                                                                    | 2 | 987.41   | -0.06 |
| 72   | IPI00888324  |          | 1    | 2 | S | 0.179822   | 51.163 |                                                                                                                                                                                                                                                                                                                                                                                                                                                                                                                                                                                                                                                                                    | 2 | 912.387  | -0.06 |
| 120  | IPI00055954  | WDR43    | 1    | 1 | S | 0.0281936  | 130.93 |                                                                                                                                                                                                                                                                                                                                                                                                                                                                                                                                                                                                                                                                                    | 2 | 568.777  | -0.06 |
| 27   | IPI00026337; | RANBP3   | 1    | 1 | S | 0.126598   | 58.94  |                                                                                                                                                                                                                                                                                                                                                                                                                                                                                                                                                                                                                                                                                    | 2 | 648.303  | -0.06 |
| 177  | IPI00021812  | AHNAK    | 1    | 1 | S | 0.0533729  | 87.769 |                                                                                                                                                                                                                                                                                                                                                                                                                                                                                                                                                                                                                                                                                    | 2 | 615.768  | -0.05 |
| 18   | IPI00217468; | HIST1H1B | 1    | 1 | S | 3.18E-12   | 119.22 |                                                                                                                                                                                                                                                                                                                                                                                                                                                                                                                                                                                                                                                                                    | 2 | 1052.496 | -0.05 |
| 61   | IPI00009906  | ARMCX3   | 1    | 1 | S | 5.04E-08   | 117.38 |                                                                                                                                                                                                                                                                                                                                                                                                                                                                                                                                                                                                                                                                                    | 2 | 942.808  | -0.05 |
| 146  | IPI00386803; | LASP1    | 1    | 1 | S | 2.32E-05   | 147.5  |                                                                                                                                                                                                                                                                                                                                                                                                                                                                                                                                                                                                                                                                                    | 2 | 625.744  | -0.05 |
| 926  | IPI00409590; | LMO7     | 1    | 1 | S | 0.163614   | 97.769 |                                                                                                                                                                                                                                                                                                                                                                                                                                                                                                                                                                                                                                                                                    | 2 | 405.199  | -0.05 |
| 78   | IPI00219774; | PRKAR2A  | 1    | 2 | S | 0.00054029 | 68.27  |                                                                                                                                                                                                                                                                                                                                                                                                                                                                                                                                                                                                                                                                                    | 2 | 1317.031 | -0.05 |
| 80   | IPI00219774; | PRKAR2A  | 1    | 2 | S | 0.00054029 | 68.27  |                                                                                                                                                                                                                                                                                                                                                                                                                                                                                                                                                                                                                                                                                    | 2 | 1317.031 | -0.05 |
| 221  | IPI00011253; | RPS3     | 0.85 | 1 | T | 0.00035686 | 97.936 |                                                                                                                                                                                                                                                                                                                                                                                                                                                                                                                                                                                                                                                                                    | 2 | 775.871  | -0.05 |
| 490  | IPI00008918; | LIMA1    | 0.98 | 1 | S | 0.010615   | 77.455 |                                                                                                                                                                                                                                                                                                                                                                                                                                                                                                                                                                                                                                                                                    | 2 | 814.372  | -0.05 |
| 350  | IPI00871695; | DEK      | 1    | 4 | S | 5.56E-11   | 129.11 |                                                                                                                                                                                                                                                                                                                                                                                                                                                                                                                                                                                                                                                                                    | 2 | 1128.388 | -0.05 |
| 352  | IPI00871695; | DEK      | 1    | 4 | S | 5.56E-11   | 129.11 |                                                                                                                                                                                                                                                                                                                                                                                                                                                                                                                                                                                                                                                                                    | 2 | 1128.388 | -0.05 |

|      |              |              |      |   |   |            |        |                                                     |   |          |       |
|------|--------------|--------------|------|---|---|------------|--------|-----------------------------------------------------|---|----------|-------|
| 355  | IPI00871695; | DEK          | 1    | 4 | S | 5.56E-11   | 129.11 | _KES(ph)ES(ph)EDS(ph)S(ph)D<br>DEPLIKK_             | 2 | 1128.388 | -0.05 |
| 356  | IPI00871695; | DEK          | 1    | 4 | S | 5.56E-11   | 129.11 | _KES(ph)ES(ph)EDS(ph)S(ph)D<br>DEPLIKK_             | 2 | 1128.388 | -0.05 |
| 599  | IPI00020984  | CANX         | 1    | 1 | S | 1.49E-09   | 114.7  | _SDAEEDGGTVS(ph)QEEEDRKP<br>K_                      | 2 | 1143.474 | -0.05 |
| 145  | IPI00219301  | MARCKS       | 0.84 | 1 | S | 1.69E-05   | 101.13 | _AEDGATPS(ph)PSNETPK_<br>_M(ox)PSARPPS(ph)PPLSSWER  | 2 | 790.827  | -0.04 |
| 915  | IPI00179757  | KIF1C        | 0.96 | 1 | S | 0.0706787  | 55.439 | _                                                   | 3 | 630.957  | -0.04 |
| 1666 | IPI00855787; | TNKS1BP1     | 1    | 1 | S | 7.44E-10   | 131.77 | _NRS(ph)AEEGELAESK_<br>_YHLPDAES(ph)DEDEDFKEQTR     | 2 | 750.322  | -0.04 |
| 253  | IPI00871851; | NEDD5        | 1    | 1 | S | 2.06E-78   | 252.35 | _                                                   | 3 | 839.687  | -0.04 |
| 902  | IPI00173549; | SYNPO2       | 1    | 1 | S | 0.00462082 | 87.563 | _AQS(ph)PTPSLPASWK_                                 | 2 | 725.342  | -0.04 |
| 768  | IPI00513743; | HSPH1        | 1    | 1 | S | 0.130392   | 114.35 | _IES(ph)PKLER_                                      | 2 | 526.263  | -0.04 |
| 618  | IPI00013174  | RBM14        | 1    | 1 | S | 2.32E-05   | 147.5  | _RLS(ph)ESQLSFR_<br>_LTDEDFS(ph)PFGSGGGLFSGG<br>K_  | 2 | 651.814  | -0.04 |
| 352  | IPI00514705; | FAM21C       | 1    | 1 | S | 1.79E-14   | 129.11 | _                                                   | 2 | 1027.941 | -0.04 |
| 123  | IPI00872944; | NUCKS1       | 1    | 1 | S | 3.45E-20   | 163.63 | _NSQEDES(ph)EDSEDKDVK_<br>_AS(ph)VDTKEAEGAPQVEAGKR  | 2 | 902.841  | -0.03 |
| 289  | IPI00218694; | CALD1        | 0.95 | 1 | S | 1.42E-17   | 141.14 | _                                                   | 3 | 674.988  | -0.03 |
| 2014 | IPI00020356; | MAP1A        | 1    | 1 | S | 3.45E-07   | 95.176 | _WLAES(ph)PVGLPPEEDKLTR_                            | 3 | 749.363  | -0.03 |
| 1219 | IPI00782992; | SRRM2        | 1    | 1 | S | 0.139938   | 63.85  | _SGAGSS(ph)PETK_                                    | 2 | 500.703  | -0.03 |
| 729  | IPI00007334; | ACIN1        | 1    | 1 | S | 0.181464   | 117.35 | _LQPERGS(ph)PK_<br>_AGLESGAEPGDGDS(ph)DTTKK         | 2 | 546.266  | -0.03 |
| 494  | IPI00873935; | DKC1         | 1    | 1 | S | 9.01E-26   | 156.33 | _                                                   | 2 | 957.902  | -0.03 |
| 233  | IPI00477313; | HNRNPC       | 1    | 1 | S | 7.07E-20   | 172.81 | _NDKS(ph)EEEQSSSVK_                                 | 2 | 817.333  | -0.02 |
| 85   | IPI00784614; | Ov/Br septin | 1    | 1 | S | 1.10E-10   | 164.06 | _HVDSLQRS(ph)PK_                                    | 2 | 667.317  | -0.02 |
| 268  | IPI00294742  | LARP7        | 0.99 | 1 | S | 1.48E-20   | 147.94 | _SRPTSEGS(ph)DIESTEPQK_<br>_QKS(ph)DAEEDGGTVSQEEEDR | 2 | 964.418  | -0.02 |
| 589  | IPI00020984  | CANX         | 0.99 | 1 | S | 1.49E-09   | 114.7  | _                                                   | 2 | 1094.929 | -0.02 |
| 2    | IPI00917683; | SUMO1        | 1    | 1 | S | 3.62E-42   | 205.38 | _(ac)S(ph)DQEAKPSTEDLGDKK_                          | 3 | 623.942  | -0.02 |
| 63   | IPI00922070; | CLN6         | 1    | 1 | S | 5.98E-07   | 150.24 | _HGS(ph)VSADEAAR_                                   | 2 | 590.243  | -0.02 |
| 276  | IPI00021888; | SLC39A7      | 1    | 2 | S | 0.0149061  | 72.844 | _EKQS(ph)S(ph)EEEEKETR_                             | 2 | 884.837  | -0.02 |
| 275  | IPI00021888; | SLC39A7      | 1    | 2 | S | 0.0149061  | 72.844 | _EKQS(ph)S(ph)EEEEKETR_                             | 2 | 884.837  | -0.02 |
| 445  | IPI00064212  | ZNF828       | 0.99 | 1 | S | 0.032903   | 74.039 | _KPSGS(ph)PDLWK_                                    | 2 | 597.781  | -0.02 |
| 2344 | IPI00020356; | MAP1A        | 0.94 | 1 | S | 9.69E-67   | 243.15 | _SHWDDSTS(ph)DSELEK_                                | 2 | 858.325  | -0.02 |

|      |              |          |      |   |   |            |        |                                                     |   |          |       |
|------|--------------|----------|------|---|---|------------|--------|-----------------------------------------------------|---|----------|-------|
| 1058 | IPI00178187; | EHBP1    | 1    | 1 | S | 0.0295307  | 120.67 | _KPS(ph)EDEVLNK_                                    | 2 | 619.787  | -0.02 |
| 37   | IPI00220644; | PKM2     | 1    | 1 | S | 6.54E-05   | 136.96 | _LDIDS(ph)PPITAR_                                   | 2 | 639.31   | -0.02 |
| 125  | IPI00643342; | PEA15    | 1    | 1 | S | 0.204201   | 95.09  | _IPS(ph)AKK_                                        | 2 | 362.194  | -0.02 |
| 426  | IPI00021405; | LMNA     | 1    | 1 | S | 0.130392   | 114.35 | _KLESTES(ph)R_<br>_RGGGSGGGEES(ph)EGEEVDED          | 2 | 515.234  | -0.02 |
| 304  | IPI00045051  | PURB     | 1    | 1 | S | 3.94E-08   | 105.09 | _                                                   | 2 | 966.342  | -0.02 |
| 203  | IPI00169383; | PGK1     | 1    | 1 | S | 0.00488814 | 68.515 | _ALES(ph)PERPFLAILGGAK_                             | 3 | 616.992  | -0.02 |
| 599  | IPI00889541; | DDX17    | 1    | 1 | S | 0.163614   | 97.769 | _RDS(ph)ASYR_                                       | 2 | 467.693  | -0.02 |
| 669  | IPI00013290; | HDGFRP2  | 1    | 1 | S | 0.0498288  | 63.588 | _ARGDS(ph)EALDEES_<br>_TPNNVVSTPAPS(ph)PDASQLA      | 2 | 679.759  | -0.02 |
| 960  | IPI00409590; | LMO7     | 0.99 | 1 | S | 9.78E-08   | 76.746 | SSLSSQK_                                            | 3 | 888.424  | -0.02 |
| 254  | IPI00328868; | HS1BP3   | 1    | 1 | S | 1.24E-05   | 91.235 | _KLSPQDPS(ph)EDVSSVDPLK_                            | 2 | 1010.977 | -0.01 |
| 454  | IPI00644438; | TMEM201  | 1    | 1 | S | 0.0498288  | 63.588 | _ALS(ph)LGTIPSLTR_                                  | 2 | 654.85   | -0.01 |
| 356  | IPI00760962; | KANK2    | 1    | 1 | S | 1.52E-05   | 104.52 | _AQS(ph)LEPYGTGLR_                                  | 2 | 686.319  | -0.01 |
| 2658 | IPI00436632; | NIPBL    | 1    | 1 | S | 6.63E-13   | 166.7  | _AITSLLGGGS(ph)PK_                                  | 2 | 590.802  | -0.01 |
| 353  | IPI00382470; | HSP90AA1 | 1    | 1 | S | 4.05E-07   | 140.37 | _DKEVS(ph)DDEAEK_                                   | 2 | 737.285  | -0.01 |
| 27   | IPI00922181; | MCM2     | 0.99 | 1 | S | 0.0163188  | 81.616 | _GNDPLTSS(ph)PGR_<br>_PSTQPRPDS(ph)WGEDNWEGL        | 2 | 590.753  | -0.01 |
| 754  | IPI00102059; | SCYL1    | 0.97 | 1 | S | 0.00431011 | 49.322 | ETDSR_                                              | 3 | 913.715  | -0.01 |
| 697  | IPI00154645; | TBC1D15  | 1    | 1 | S | 0.00897529 | 84.823 | _NDS(ph)PTQIPVSSDVCR_<br>_VHDRS(ph)EEEEEEEEEEEQP    | 2 | 877.874  | 0     |
| 253  | IPI00290071; | WDR42A   | 1    | 1 | S | 1.14E-05   | 85.62  | R_                                                  | 3 | 918.017  | 0     |
| 92   | IPI00154645; | TBC1D15  | 0.85 | 1 | S | 1.79E-06   | 113.06 | _KDS(ph)SSVVEWTQAPK_<br>_GPPDFS(ph)S(ph)DEEREPT(ph) | 2 | 821.38   | 0     |
| 66   | IPI00030131; | TMPO     | 1    | 3 | S | 1.35E-07   | 74.643 | PVLGSGAAAAGR_<br>_GPPDFS(ph)S(ph)DEEREPT(ph)        | 3 | 937.375  | 0     |
| 67   | IPI00030131; | TMPO     | 1    | 3 | S | 1.35E-07   | 74.643 | PVLGSGAAAAGR_<br>_PGPTPSGTNVGSSGRS(ph)PSK           | 3 | 937.375  | 0     |
| 17   | IPI00220835  | SEC61B   | 0.97 | 1 | S | 5.56E-06   | 86.906 | _                                                   | 3 | 617.286  | 0     |
| 430  | IPI00418471  | VIM      | 0.96 | 1 | S | 0.010615   | 77.455 | _ETNLDS(ph)LPLVDTHSK_                               | 2 | 874.909  | 0     |
| 765  | IPI00102752; | RBM15    | 0.92 | 1 | S | 0.157762   | 60.67  | _LKS(ph)PSQK_                                       | 2 | 434.22   | 0.01  |
| 296  | IPI00168849; | TRIP10   | 1    | 1 | S | 0.00065477 | 83.606 | _APS(ph)DSSLGTPSDGRPELR_                            | 3 | 641.293  | 0.01  |
| 799  | IPI00852741; | SEC31A   | 1    | 1 | S | 0.00077612 | 73.723 | _AQGEPVAGHES(ph)PKIPYEK_                            | 2 | 1008.975 | 0.01  |
| 706  | IPI00604647; | MAP4K4   | 0.89 | 1 | S | 0.0587974  | 84.823 | _TTS(ph)RSPVLSR_                                    | 2 | 592.295  | 0.01  |

|      |              |          |      |   |   |            |        |                                    |   |          |      |
|------|--------------|----------|------|---|---|------------|--------|------------------------------------|---|----------|------|
| 181  | IPI00220739; | PGRMC1   | 1    | 1 | S | 3.18E-12   | 119.22 | _EGEPTVYS(ph)DEEPPKDESAR           | 2 | 1188.474 | 0.01 |
| 259  | IPI00013721  | PRPF4B   | 0.95 | 1 | T | 0.0582156  | 96.193 | _ARSPT(ph)DDKVK_                   | 3 | 399.527  | 0.01 |
| 720  | IPI00014898; | PLEC1    | 0.99 | 1 | S | 0.0121282  | 77.654 | _ARSDEGQLS(ph)PATR_                | 2 | 734.333  | 0.01 |
| 313  | IPI00298731  | PPP1R10  | 0.86 | 1 | S | 0.0738263  | 60.018 | _VLS(ph)PTAAKPSPEFGK_              | 2 | 804.905  | 0.01 |
| 57   | IPI00186290; | EEF2     | 0.98 | 1 | T | 0.00115368 | 100.32 | _AGETRFT(ph)DTR_                   | 2 | 617.267  | 0.02 |
| 286  | IPI00217683; | AKAP12   | 0.89 | 1 | S | 8.19E-07   | 104.52 | _SAESPTS(ph)PVTSETGSTFK_           | 2 | 946.912  | 0.03 |
| 298  | IPI00328715  | MTDH     | 1    | 1 | S | 6.54E-05   | 136.96 | _LSSQIS(ph)AGEEK_                  | 2 | 614.776  | 0.03 |
| 1218 | IPI00925413; | EIF4G1   | 0.99 | 1 | T | 0.00317762 | 89.162 | _KAASLT(ph)EDRDR_                  | 2 | 671.312  | 0.03 |
| 956  | IPI00853400; | FKBP15   | 1    | 1 | S | 8.07E-15   | 123.75 | _RPS(ph)QEQSASASSGQPQAPL<br>NR_    | 2 | 1138.524 | 0.04 |
| 189  | IPI00032970; | OSBPL11  | 1    | 1 | S | 3.41E-06   | 103.48 | _RPS(ph)QNAISFFNVGHSK_             | 3 | 623.632  | 0.04 |
| 494  | IPI00006079; | BCLAF1   | 0.84 | 1 | T | 2.32E-05   | 147.5  | _ET(ph)QSPEQVQSEK_                 | 2 | 735.33   | 0.04 |
| 1290 | IPI00336047; | MYO9B    | 0.86 | 1 | S | 0.00737446 | 73.116 | _VQEKPDSD(ph)PGGSTQIQR_            | 2 | 903.923  | 0.05 |
| 344  | IPI00010586; | TMF1     | 1    | 1 | S | 0.00027174 | 102.36 | _SVSEINS(ph)DDELSGK_               | 2 | 780.327  | 0.05 |
| 523  | IPI00641770; | PI4KB    | 1    | 1 | S | 0.00137881 | 97.636 | _RLS(ph)EQLAHTPTAFK_               | 3 | 560.282  | 0.05 |
| 458  | IPI00844000  | KIAA0776 | 1    | 1 | S | 0.00251508 | 82.056 | _KDDDS(ph)DDESQSSHTGK_             | 2 | 915.837  | 0.05 |
| 759  | IPI00171407; | STXBP5   | 0.99 | 1 | S | 0.0388423  | 65.53  | _KLS(ph)LPTDLKPLDVK_               | 3 | 587.985  | 0.06 |
| 521  | IPI00185919; | LARP1    | 1    | 1 | S | 0.139938   | 63.85  | _ETESAPGS(ph)PR_                   | 2 | 555.727  | 0.06 |
| 125  | IPI00478127; | TCEAL3   | 0.85 | 1 | S | 0.00019984 | 101.13 | _GTDDSPKDS(ph)QEDLQER_             | 3 | 633.925  | 0.06 |
| 836  | IPI00855787; | TNKS1BP1 | 1    | 1 | S | 1.68E-17   | 178.44 | _S(ph)QEADVQDWEFR_                 | 2 | 795.317  | 0.06 |
| 148  | IPI00514127; | HDGF     | 1    | 2 | S | 0.121864   | 56.22  | _GNAEGS(ph)S(ph)DEEGKLVID<br>EPAK_ | 2 | 1102.953 | 0.06 |
| 149  | IPI00514127; | HDGF     | 1    | 2 | S | 0.121864   | 56.22  | _GNAEGS(ph)S(ph)DEEGKLVID<br>EPAK_ | 2 | 1102.953 | 0.06 |
| 57   | IPI00220739; | PGRMC1   | 1    | 1 | S | 5.26E-56   | 206.63 | _IVRGDQPAASGDS(ph)DDDEPP<br>PLPR_  | 3 | 828.706  | 0.06 |
| 6    | IPI00247063; | MME      | 1    | 1 | S | 7.55E-41   | 191.18 | _GKSES(ph)QMDITDINTPKPK_           | 2 | 1034.985 | 0.06 |
| 426  | IPI00418471  | VIM      | 0.96 | 1 | T | 0.010615   | 77.455 | _ET(ph)NLDSLPLVDTHSKR_             | 4 | 476.983  | 0.06 |
| 703  | IPI00020060; | SLC9A1   | 1    | 1 | S | 5.98E-07   | 150.24 | _IGS(ph)DPLAYEPK_                  | 2 | 635.292  | 0.06 |
| 609  | IPI00328293; | SRRM1    | 1    | 1 | S | 0.0071244  | 88.268 | _RYS(ph)PPIQR_                     | 2 | 548.769  | 0.07 |
| 721  | IPI00307162; | VCL      | 1    | 1 | S | 0.00247607 | 89.162 | _S(ph)LLDASEEAIKK_                 | 2 | 692.342  | 0.07 |

|      |              |          |      |   |   |            |        |                                                                                                                                                                                                                                                                                                                                                                                                                                                                                                                                                                                                                                                                                                                                                                                                                                                                                                                                                                                                                                                                                                                                                                                                                                                                    |   |          |      |
|------|--------------|----------|------|---|---|------------|--------|--------------------------------------------------------------------------------------------------------------------------------------------------------------------------------------------------------------------------------------------------------------------------------------------------------------------------------------------------------------------------------------------------------------------------------------------------------------------------------------------------------------------------------------------------------------------------------------------------------------------------------------------------------------------------------------------------------------------------------------------------------------------------------------------------------------------------------------------------------------------------------------------------------------------------------------------------------------------------------------------------------------------------------------------------------------------------------------------------------------------------------------------------------------------------------------------------------------------------------------------------------------------|---|----------|------|
| 253  | IPI00104050  | THRAP3   | 0.88 | 2 | S | 0.0023183  | 84.15  | _ERS(ph)PALKS(ph)PLQSVVVR_<br>_DLFDLNS(ph)S(ph)EEDDTEGFS                                                                                                                                                                                                                                                                                                                                                                                                                                                                                                                                                                                                                                                                                                                                                                                                                                                                                                                                                                                                                                                                                                                                                                                                           | 3 | 642.659  | 0.07 |
| 673  | IPI00411886; | NOC2L    | 1    | 2 | S | 3.04E-18   | 139.3  | ER_<br>_DLFDLNS(ph)S(ph)EEDDTEGFS                                                                                                                                                                                                                                                                                                                                                                                                                                                                                                                                                                                                                                                                                                                                                                                                                                                                                                                                                                                                                                                                                                                                                                                                                                  | 2 | 1182.925 | 0.07 |
| 672  | IPI00411886; | NOC2L    | 1    | 2 | S | 3.04E-18   | 139.3  | ER_<br>_DLFDLNS(ph)S(ph)EEDDTEGFS                                                                                                                                                                                                                                                                                                                                                                                                                                                                                                                                                                                                                                                                                                                                                                                                                                                                                                                                                                                                                                                                                                                                                                                                                                  | 2 | 1182.925 | 0.07 |
| 118  | IPI00024291  | BAD      | 1    | 1 | S | 1.34E-06   | 135.71 | _RM(ox)S(ph)DEFVDSFKK_<br>_RRS(ph)FS(ph)IS(ph)PVR_<br>_RRS(ph)FS(ph)IS(ph)PVR_<br>_RRS(ph)FS(ph)IS(ph)PVR_<br>_GT(ph)DDSPKDSQEDLQER_<br>_KDS(ph)LTQAQEQGNLLN_<br>_QSHSES(ph)PSLQSK_<br>_RQS(ph)FAVLR_<br>_(ac)SETAPAETAT(ph)PAPVEKS<br>PAK_<br>_KPATPAEDEDDEDDIDLFGS(ph)<br>DNEEEDKEAAQLR_<br>_ARS(ph)VS(ph)PPPKR_<br>_ARS(ph)VS(ph)PPPKR_<br>_ISLPLPNFSS(ph)LNLR_<br>_RSNS(ph)PDKFK_<br>_LKS(ph)STSFANIQENSN_<br>_AAS(ph)PSPQSVR_<br>_AALLKAS(ph)PK_<br>_S(ph)LS(ph)GSSPCPK_<br>_S(ph)LS(ph)GSSPCPK_<br>_KGAGDGS(ph)DEEVDGKADGA<br>EAK_<br>_SGLTVPTS(ph)PK_<br>_VTTEIQLPSQS(ph)PVEEQSPAS<br>LSSLR_<br>_SPGS(ph)PVGEGTGSPPK_<br>_KVS(ph)IFR_<br>_RRS(ph)FS(ph)IS(ph)PVR_<br>_RRS(ph)FS(ph)IS(ph)PVR_<br>_RRS(ph)FS(ph)IS(ph)PVR_<br>_GT(ph)DDSPKDSQEDLQER_<br>_KDS(ph)LTQAQEQGNLLN_<br>_QSHSES(ph)PSLQSK_<br>_RQS(ph)FAVLR_<br>_(ac)SETAPAETAT(ph)PAPVEKS<br>PAK_<br>_KPATPAEDEDDEDDIDLFGS(ph)<br>DNEEEDKEAAQLR_<br>_ARS(ph)VS(ph)PPPKR_<br>_ARS(ph)VS(ph)PPPKR_<br>_ISLPLPNFSS(ph)LNLR_<br>_RSNS(ph)PDKFK_<br>_LKS(ph)STSFANIQENSN_<br>_AAS(ph)PSPQSVR_<br>_AALLKAS(ph)PK_<br>_S(ph)LS(ph)GSSPCPK_<br>_S(ph)LS(ph)GSSPCPK_<br>_KGAGDGS(ph)DEEVDGKADGA<br>EAK_<br>_SGLTVPTS(ph)PK_<br>_VTTEIQLPSQS(ph)PVEEQSPAS<br>LSSLR_<br>_SPGS(ph)PVGEGTGSPPK_<br>_KVS(ph)IFR_ | 3 | 528.897  | 0.07 |
| 2049 | IPI00218624; | SON      | 1    | 3 | S | 0.167612   | 60.662 | _RRS(ph)FS(ph)IS(ph)PVR_<br>_RRS(ph)FS(ph)IS(ph)PVR_<br>_RRS(ph)FS(ph)IS(ph)PVR_<br>_GT(ph)DDSPKDSQEDLQER_<br>_KDS(ph)LTQAQEQGNLLN_<br>_QSHSES(ph)PSLQSK_<br>_RQS(ph)FAVLR_<br>_(ac)SETAPAETAT(ph)PAPVEKS<br>PAK_<br>_KPATPAEDEDDEDDIDLFGS(ph)<br>DNEEEDKEAAQLR_<br>_ARS(ph)VS(ph)PPPKR_<br>_ARS(ph)VS(ph)PPPKR_<br>_ISLPLPNFSS(ph)LNLR_<br>_RSNS(ph)PDKFK_<br>_LKS(ph)STSFANIQENSN_<br>_AAS(ph)PSPQSVR_<br>_AALLKAS(ph)PK_<br>_S(ph)LS(ph)GSSPCPK_<br>_S(ph)LS(ph)GSSPCPK_<br>_KGAGDGS(ph)DEEVDGKADGA<br>EAK_<br>_SGLTVPTS(ph)PK_<br>_VTTEIQLPSQS(ph)PVEEQSPAS<br>LSSLR_<br>_SPGS(ph)PVGEGTGSPPK_<br>_KVS(ph)IFR_                                                                                                                                                                                                                                                                                                                                                                                                                                                                                                                                                                                                                                                 | 2 | 722.799  | 0.07 |
| 2051 | IPI00218624; | SON      | 1    | 3 | S | 0.167612   | 60.662 | _RRS(ph)FS(ph)IS(ph)PVR_<br>_RRS(ph)FS(ph)IS(ph)PVR_<br>_RRS(ph)FS(ph)IS(ph)PVR_<br>_GT(ph)DDSPKDSQEDLQER_<br>_KDS(ph)LTQAQEQGNLLN_<br>_QSHSES(ph)PSLQSK_<br>_RQS(ph)FAVLR_<br>_(ac)SETAPAETAT(ph)PAPVEKS<br>PAK_<br>_KPATPAEDEDDEDDIDLFGS(ph)<br>DNEEEDKEAAQLR_<br>_ARS(ph)VS(ph)PPPKR_<br>_ARS(ph)VS(ph)PPPKR_<br>_ISLPLPNFSS(ph)LNLR_<br>_RSNS(ph)PDKFK_<br>_LKS(ph)STSFANIQENSN_<br>_AAS(ph)PSPQSVR_<br>_AALLKAS(ph)PK_<br>_S(ph)LS(ph)GSSPCPK_<br>_S(ph)LS(ph)GSSPCPK_<br>_KGAGDGS(ph)DEEVDGKADGA<br>EAK_<br>_SGLTVPTS(ph)PK_<br>_VTTEIQLPSQS(ph)PVEEQSPAS<br>LSSLR_<br>_SPGS(ph)PVGEGTGSPPK_<br>_KVS(ph)IFR_                                                                                                                                                                                                                                                                                                                                                                                                                                                                                                                                                                                                                                                 | 2 | 722.799  | 0.07 |
| 2053 | IPI00218624; | SON      | 1    | 3 | S | 0.167612   | 60.662 | _RRS(ph)FS(ph)IS(ph)PVR_<br>_RRS(ph)FS(ph)IS(ph)PVR_<br>_RRS(ph)FS(ph)IS(ph)PVR_<br>_GT(ph)DDSPKDSQEDLQER_<br>_KDS(ph)LTQAQEQGNLLN_<br>_QSHSES(ph)PSLQSK_<br>_RQS(ph)FAVLR_<br>_(ac)SETAPAETAT(ph)PAPVEKS<br>PAK_<br>_KPATPAEDEDDEDDIDLFGS(ph)<br>DNEEEDKEAAQLR_<br>_ARS(ph)VS(ph)PPPKR_<br>_ARS(ph)VS(ph)PPPKR_<br>_ISLPLPNFSS(ph)LNLR_<br>_RSNS(ph)PDKFK_<br>_LKS(ph)STSFANIQENSN_<br>_AAS(ph)PSPQSVR_<br>_AALLKAS(ph)PK_<br>_S(ph)LS(ph)GSSPCPK_<br>_S(ph)LS(ph)GSSPCPK_<br>_KGAGDGS(ph)DEEVDGKADGA<br>EAK_<br>_SGLTVPTS(ph)PK_<br>_VTTEIQLPSQS(ph)PVEEQSPAS<br>LSSLR_<br>_SPGS(ph)PVGEGTGSPPK_<br>_KVS(ph)IFR_                                                                                                                                                                                                                                                                                                                                                                                                                                                                                                                                                                                                                                                 | 2 | 722.799  | 0.07 |
| 118  | IPI00478127; | TCEAL3   | 0.9  | 1 | T | 0.00019984 | 101.13 | _GT(ph)DDSPKDSQEDLQER_<br>_KDS(ph)LTQAQEQGNLLN_<br>_QSHSES(ph)PSLQSK_<br>_RQS(ph)FAVLR_<br>_(ac)SETAPAETAT(ph)PAPVEKS<br>PAK_<br>_KPATPAEDEDDEDDIDLFGS(ph)<br>DNEEEDKEAAQLR_<br>_ARS(ph)VS(ph)PPPKR_<br>_ARS(ph)VS(ph)PPPKR_<br>_ISLPLPNFSS(ph)LNLR_<br>_RSNS(ph)PDKFK_<br>_LKS(ph)STSFANIQENSN_<br>_AAS(ph)PSPQSVR_<br>_AALLKAS(ph)PK_<br>_S(ph)LS(ph)GSSPCPK_<br>_S(ph)LS(ph)GSSPCPK_<br>_KGAGDGS(ph)DEEVDGKADGA<br>EAK_<br>_SGLTVPTS(ph)PK_<br>_VTTEIQLPSQS(ph)PVEEQSPAS<br>LSSLR_<br>_SPGS(ph)PVGEGTGSPPK_<br>_KVS(ph)IFR_                                                                                                                                                                                                                                                                                                                                                                                                                                                                                                                                                                                                                                                                                                                                     | 2 | 950.384  | 0.07 |
| 545  | IPI00010544; | TJAP1    | 0.98 | 1 | S | 0.0248355  | 68.515 | _KDS(ph)LTQAQEQGNLLN_<br>_QSHSES(ph)PSLQSK_<br>_RQS(ph)FAVLR_<br>_(ac)SETAPAETAT(ph)PAPVEKS<br>PAK_<br>_KPATPAEDEDDEDDIDLFGS(ph)<br>DNEEEDKEAAQLR_<br>_ARS(ph)VS(ph)PPPKR_<br>_ARS(ph)VS(ph)PPPKR_<br>_ISLPLPNFSS(ph)LNLR_<br>_RSNS(ph)PDKFK_<br>_LKS(ph)STSFANIQENSN_<br>_AAS(ph)PSPQSVR_<br>_AALLKAS(ph)PK_<br>_S(ph)LS(ph)GSSPCPK_<br>_S(ph)LS(ph)GSSPCPK_<br>_KGAGDGS(ph)DEEVDGKADGA<br>EAK_<br>_SGLTVPTS(ph)PK_<br>_VTTEIQLPSQS(ph)PVEEQSPAS<br>LSSLR_<br>_SPGS(ph)PVGEGTGSPPK_<br>_KVS(ph)IFR_                                                                                                                                                                                                                                                                                                                                                                                                                                                                                                                                                                                                                                                                                                                                                               | 2 | 869.904  | 0.08 |
| 1083 | IPI00782992; | SRRM2    | 0.95 | 1 | S | 0.0457194  | 63.588 | _QSHSES(ph)PSLQSK_<br>_RQS(ph)FAVLR_<br>_(ac)SETAPAETAT(ph)PAPVEKS<br>PAK_<br>_KPATPAEDEDDEDDIDLFGS(ph)<br>DNEEEDKEAAQLR_<br>_ARS(ph)VS(ph)PPPKR_<br>_ARS(ph)VS(ph)PPPKR_<br>_ISLPLPNFSS(ph)LNLR_<br>_RSNS(ph)PDKFK_<br>_LKS(ph)STSFANIQENSN_<br>_AAS(ph)PSPQSVR_<br>_AALLKAS(ph)PK_<br>_S(ph)LS(ph)GSSPCPK_<br>_S(ph)LS(ph)GSSPCPK_<br>_KGAGDGS(ph)DEEVDGKADGA<br>EAK_<br>_SGLTVPTS(ph)PK_<br>_VTTEIQLPSQS(ph)PVEEQSPAS<br>LSSLR_<br>_SPGS(ph)PVGEGTGSPPK_<br>_KVS(ph)IFR_                                                                                                                                                                                                                                                                                                                                                                                                                                                                                                                                                                                                                                                                                                                                                                                        | 2 | 697.801  | 0.08 |
| 37   | IPI00218486; | SSH3     | 1    | 1 | S | 0.012792   | 128.52 | _RQS(ph)FAVLR_<br>_(ac)SETAPAETAT(ph)PAPVEKS<br>PAK_<br>_KPATPAEDEDDEDDIDLFGS(ph)<br>DNEEEDKEAAQLR_<br>_ARS(ph)VS(ph)PPPKR_<br>_ARS(ph)VS(ph)PPPKR_<br>_ISLPLPNFSS(ph)LNLR_<br>_RSNS(ph)PDKFK_<br>_LKS(ph)STSFANIQENSN_<br>_AAS(ph)PSPQSVR_<br>_AALLKAS(ph)PK_<br>_S(ph)LS(ph)GSSPCPK_<br>_S(ph)LS(ph)GSSPCPK_<br>_KGAGDGS(ph)DEEVDGKADGA<br>EAK_<br>_SGLTVPTS(ph)PK_<br>_VTTEIQLPSQS(ph)PVEEQSPAS<br>LSSLR_<br>_SPGS(ph)PVGEGTGSPPK_<br>_KVS(ph)IFR_                                                                                                                                                                                                                                                                                                                                                                                                                                                                                                                                                                                                                                                                                                                                                                                                              | 2 | 528.771  | 0.08 |
| 11   | IPI00217468; | HIST1H1B | 0.95 | 1 | T | 3.18E-12   | 119.22 | _(ac)SETAPAETAT(ph)PAPVEKS<br>PAK_<br>_KPATPAEDEDDEDDIDLFGS(ph)<br>DNEEEDKEAAQLR_<br>_ARS(ph)VS(ph)PPPKR_<br>_ARS(ph)VS(ph)PPPKR_<br>_ISLPLPNFSS(ph)LNLR_<br>_RSNS(ph)PDKFK_<br>_LKS(ph)STSFANIQENSN_<br>_AAS(ph)PSPQSVR_<br>_AALLKAS(ph)PK_<br>_S(ph)LS(ph)GSSPCPK_<br>_S(ph)LS(ph)GSSPCPK_<br>_KGAGDGS(ph)DEEVDGKADGA<br>EAK_<br>_SGLTVPTS(ph)PK_<br>_VTTEIQLPSQS(ph)PVEEQSPAS<br>LSSLR_<br>_SPGS(ph)PVGEGTGSPPK_<br>_KVS(ph)IFR_                                                                                                                                                                                                                                                                                                                                                                                                                                                                                                                                                                                                                                                                                                                                                                                                                                | 2 | 1052.496 | 0.08 |
| 528  | IPI00642971; | EEF1D    | 1    | 1 | S | 2.07E-26   | 119.73 | DNEEEDKEAAQLR_<br>_ARS(ph)VS(ph)PPPKR_<br>_ARS(ph)VS(ph)PPPKR_<br>_ISLPLPNFSS(ph)LNLR_<br>_RSNS(ph)PDKFK_<br>_LKS(ph)STSFANIQENSN_<br>_AAS(ph)PSPQSVR_<br>_AALLKAS(ph)PK_<br>_S(ph)LS(ph)GSSPCPK_<br>_S(ph)LS(ph)GSSPCPK_<br>_KGAGDGS(ph)DEEVDGKADGA<br>EAK_<br>_SGLTVPTS(ph)PK_<br>_VTTEIQLPSQS(ph)PVEEQSPAS<br>LSSLR_<br>_SPGS(ph)PVGEGTGSPPK_<br>_KVS(ph)IFR_                                                                                                                                                                                                                                                                                                                                                                                                                                                                                                                                                                                                                                                                                                                                                                                                                                                                                                   | 4 | 915.136  | 0.09 |
| 314  | IPI00012345  | SFRS6    | 1    | 2 | S | 0.0547288  | 87.033 | _ARS(ph)VS(ph)PPPKR_<br>_ARS(ph)VS(ph)PPPKR_<br>_ISLPLPNFSS(ph)LNLR_<br>_RSNS(ph)PDKFK_<br>_LKS(ph)STSFANIQENSN_<br>_AAS(ph)PSPQSVR_<br>_AALLKAS(ph)PK_<br>_S(ph)LS(ph)GSSPCPK_<br>_S(ph)LS(ph)GSSPCPK_<br>_KGAGDGS(ph)DEEVDGKADGA<br>EAK_<br>_SGLTVPTS(ph)PK_<br>_VTTEIQLPSQS(ph)PVEEQSPAS<br>LSSLR_<br>_SPGS(ph)PVGEGTGSPPK_<br>_KVS(ph)IFR_                                                                                                                                                                                                                                                                                                                                                                                                                                                                                                                                                                                                                                                                                                                                                                                                                                                                                                                     | 3 | 418.863  | 0.09 |
| 316  | IPI00012345  | SFRS6    | 1    | 2 | S | 0.0547288  | 87.033 | _ARS(ph)VS(ph)PPPKR_<br>_ARS(ph)VS(ph)PPPKR_<br>_ISLPLPNFSS(ph)LNLR_<br>_RSNS(ph)PDKFK_<br>_LKS(ph)STSFANIQENSN_<br>_AAS(ph)PSPQSVR_<br>_AALLKAS(ph)PK_<br>_S(ph)LS(ph)GSSPCPK_<br>_S(ph)LS(ph)GSSPCPK_<br>_KGAGDGS(ph)DEEVDGKADGA<br>EAK_<br>_SGLTVPTS(ph)PK_<br>_VTTEIQLPSQS(ph)PVEEQSPAS<br>LSSLR_<br>_SPGS(ph)PVGEGTGSPPK_<br>_KVS(ph)IFR_                                                                                                                                                                                                                                                                                                                                                                                                                                                                                                                                                                                                                                                                                                                                                                                                                                                                                                                     | 3 | 418.863  | 0.09 |
| 420  | IPI00418471  | VIM      | 0.84 | 1 | S | 0.132877   | 55.439 | _ISLPLPNFSS(ph)LNLR_<br>_RSNS(ph)PDKFK_<br>_LKS(ph)STSFANIQENSN_<br>_AAS(ph)PSPQSVR_<br>_AALLKAS(ph)PK_<br>_S(ph)LS(ph)GSSPCPK_<br>_S(ph)LS(ph)GSSPCPK_<br>_KGAGDGS(ph)DEEVDGKADGA<br>EAK_<br>_SGLTVPTS(ph)PK_<br>_VTTEIQLPSQS(ph)PVEEQSPAS<br>LSSLR_<br>_SPGS(ph)PVGEGTGSPPK_<br>_KVS(ph)IFR_                                                                                                                                                                                                                                                                                                                                                                                                                                                                                                                                                                                                                                                                                                                                                                                                                                                                                                                                                                     | 3 | 550.959  | 0.09 |
| 419  | IPI00000634; | CCDC6    | 1    | 1 | S | 2.43E-06   | 117.35 | _RSNS(ph)PDKFK_<br>_LKS(ph)STSFANIQENSN_<br>_AAS(ph)PSPQSVR_<br>_AALLKAS(ph)PK_<br>_S(ph)LS(ph)GSSPCPK_<br>_S(ph)LS(ph)GSSPCPK_<br>_KGAGDGS(ph)DEEVDGKADGA<br>EAK_<br>_SGLTVPTS(ph)PK_<br>_VTTEIQLPSQS(ph)PVEEQSPAS<br>LSSLR_<br>_SPGS(ph)PVGEGTGSPPK_<br>_KVS(ph)IFR_                                                                                                                                                                                                                                                                                                                                                                                                                                                                                                                                                                                                                                                                                                                                                                                                                                                                                                                                                                                             | 2 | 579.769  | 0.09 |
| 322  | IPI00329054  | OSTM1    | 0.75 | 1 | S | 0.0493274  | 63.85  | _LKS(ph)STSFANIQENSN_<br>_AAS(ph)PSPQSVR_<br>_AALLKAS(ph)PK_<br>_S(ph)LS(ph)GSSPCPK_<br>_S(ph)LS(ph)GSSPCPK_<br>_KGAGDGS(ph)DEEVDGKADGA<br>EAK_<br>_SGLTVPTS(ph)PK_<br>_VTTEIQLPSQS(ph)PVEEQSPAS<br>LSSLR_<br>_SPGS(ph)PVGEGTGSPPK_<br>_KVS(ph)IFR_                                                                                                                                                                                                                                                                                                                                                                                                                                                                                                                                                                                                                                                                                                                                                                                                                                                                                                                                                                                                                | 2 | 860.383  | 0.09 |
| 750  | IPI00328293; | SRRM1    | 0.99 | 1 | S | 5.67E-06   | 112.01 | _AAS(ph)PSPQSVR_<br>_AALLKAS(ph)PK_<br>_S(ph)LS(ph)GSSPCPK_<br>_S(ph)LS(ph)GSSPCPK_<br>_KGAGDGS(ph)DEEVDGKADGA<br>EAK_<br>_SGLTVPTS(ph)PK_<br>_VTTEIQLPSQS(ph)PVEEQSPAS<br>LSSLR_<br>_SPGS(ph)PVGEGTGSPPK_<br>_KVS(ph)IFR_                                                                                                                                                                                                                                                                                                                                                                                                                                                                                                                                                                                                                                                                                                                                                                                                                                                                                                                                                                                                                                         | 2 | 540.248  | 0.09 |
| 139  | IPI00555744; | RPL14    | 1    | 1 | S | 0.0281936  | 130.93 | _AALLKAS(ph)PK_<br>_S(ph)LS(ph)GSSPCPK_<br>_S(ph)LS(ph)GSSPCPK_<br>_KGAGDGS(ph)DEEVDGKADGA<br>EAK_<br>_SGLTVPTS(ph)PK_<br>_VTTEIQLPSQS(ph)PVEEQSPAS<br>LSSLR_<br>_SPGS(ph)PVGEGTGSPPK_<br>_KVS(ph)IFR_                                                                                                                                                                                                                                                                                                                                                                                                                                                                                                                                                                                                                                                                                                                                                                                                                                                                                                                                                                                                                                                             | 2 | 489.773  | 0.09 |
| 780  | IPI00782992; | SRRM2    | 1    | 2 | S | 0.189076   | 52.782 | _S(ph)LS(ph)GSSPCPK_<br>_S(ph)LS(ph)GSSPCPK_<br>_KGAGDGS(ph)DEEVDGKADGA<br>EAK_<br>_SGLTVPTS(ph)PK_<br>_VTTEIQLPSQS(ph)PVEEQSPAS<br>LSSLR_<br>_SPGS(ph)PVGEGTGSPPK_<br>_KVS(ph)IFR_                                                                                                                                                                                                                                                                                                                                                                                                                                                                                                                                                                                                                                                                                                                                                                                                                                                                                                                                                                                                                                                                                | 2 | 590.211  | 0.09 |
| 778  | IPI00782992; | SRRM2    | 1    | 2 | S | 0.189076   | 52.782 | _S(ph)LS(ph)GSSPCPK_<br>_S(ph)LS(ph)GSSPCPK_<br>_KGAGDGS(ph)DEEVDGKADGA<br>EAK_<br>_SGLTVPTS(ph)PK_<br>_VTTEIQLPSQS(ph)PVEEQSPAS<br>LSSLR_<br>_SPGS(ph)PVGEGTGSPPK_<br>_KVS(ph)IFR_                                                                                                                                                                                                                                                                                                                                                                                                                                                                                                                                                                                                                                                                                                                                                                                                                                                                                                                                                                                                                                                                                | 2 | 590.211  | 0.09 |
| 1943 | IPI00019502; | MYH9     | 1    | 1 | S | 1.52E-79   | 234.88 | EAK_<br>_SGLTVPTS(ph)PK_<br>_VTTEIQLPSQS(ph)PVEEQSPAS<br>LSSLR_<br>_SPGS(ph)PVGEGTGSPPK_<br>_KVS(ph)IFR_                                                                                                                                                                                                                                                                                                                                                                                                                                                                                                                                                                                                                                                                                                                                                                                                                                                                                                                                                                                                                                                                                                                                                           | 2 | 1043.434 | 0.09 |
| 94   | IPI00290110; | PDCD4    | 0.89 | 1 | S | 0.00081819 | 93.536 | _SGLTVPTS(ph)PK_<br>_VTTEIQLPSQS(ph)PVEEQSPAS<br>LSSLR_<br>_SPGS(ph)PVGEGTGSPPK_<br>_KVS(ph)IFR_                                                                                                                                                                                                                                                                                                                                                                                                                                                                                                                                                                                                                                                                                                                                                                                                                                                                                                                                                                                                                                                                                                                                                                   | 2 | 533.763  | 0.09 |
| 867  | IPI00409590; | LMO7     | 0.97 | 1 | S | 7.98E-07   | 80.066 | LSSLR_<br>_SPGS(ph)PVGEGTGSPPK_<br>_KVS(ph)IFR_                                                                                                                                                                                                                                                                                                                                                                                                                                                                                                                                                                                                                                                                                                                                                                                                                                                                                                                                                                                                                                                                                                                                                                                                                    | 3 | 921.786  | 0.1  |
| 358  | IPI00220158; | ADD1     | 0.95 | 1 | S | 0.0248355  | 68.515 | _SPGS(ph)PVGEGTGSPPK_<br>_KVS(ph)IFR_                                                                                                                                                                                                                                                                                                                                                                                                                                                                                                                                                                                                                                                                                                                                                                                                                                                                                                                                                                                                                                                                                                                                                                                                                              | 2 | 717.319  | 0.1  |
| 187  | IPI00432363; | MACF1    | 1    | 1 | S | 0.157002   | 68.258 | _KVS(ph)IFR_                                                                                                                                                                                                                                                                                                                                                                                                                                                                                                                                                                                                                                                                                                                                                                                                                                                                                                                                                                                                                                                                                                                                                                                                                                                       | 2 | 415.22   | 0.1  |

|      |              |          |      |   |   |            |        |                                  |   |          |      |
|------|--------------|----------|------|---|---|------------|--------|----------------------------------|---|----------|------|
| 1509 | IPI00221325  | RANBP2   | 0.99 | 1 | S | 0.11493    | 48.846 | _KQS(ph)LPATSIPTASFK_            | 2 | 876.95   | 0.1  |
| 137  | IPI00643342; | PEA15    | 1    | 1 | S | 5.06E-06   | 108.77 | _QPS(ph)EEEEIK_                  | 2 | 576.763  | 0.11 |
| 4622 | IPI00014898; | PLEC1    | 0.87 | 1 | S | 2.82E-06   | 100.53 | _GYSPYSVSGSGS(ph)TAGSR_          | 2 | 931.883  | 0.11 |
| 244  | IPI00007423  | ANP32B   | 1    | 1 | T | 0.00102008 | 112.01 | _KRET(ph)DDEGEDD_                | 2 | 694.746  | 0.11 |
| 405  | IPI00009771; | LMNB2    | 1    | 1 | S | 0.0587974  | 84.823 | _LKLS(ph)PSPSSR_                 | 2 | 576.295  | 0.11 |
| 100  | IPI00290239; | CAMKK2   | 1    | 1 | S | 0.0204923  | 111.83 | _KLS(ph)LQER_                    | 2 | 477.244  | 0.11 |
| 429  | IPI00328293; | SRRM1    | 0.77 | 2 | S | 0.0819795  | 76.632 | _KSRVS(ph)VS(ph)PGR_             | 2 | 616.781  | 0.12 |
| 431  | IPI00328293; | SRRM1    | 1    | 2 | S | 0.0819795  | 76.632 | _KSRVS(ph)VS(ph)PGR_             | 2 | 616.781  | 0.12 |
| 41   | IPI00304409  | CARHSP1  | 1    | 1 | S | 0.00102008 | 112.01 | _GNVVPS(ph)PLPTR_                | 2 | 608.808  | 0.12 |
| 10   | IPI00103530; | ATL1     | 1    | 1 | S | 0.00317762 | 89.162 | _DRNS(ph)WGGFSEK_                | 2 | 681.777  | 0.12 |
| 1923 | IPI00782992; | SRRM2    | 1    | 3 | S | 0.0883219  | 74.808 | _S(ph)RS(ph)RT(ph)PPVTR_         | 2 | 698.78   | 0.12 |
| 4    | IPI00375144; | SRRT     | 1    | 1 | S | 0.139938   | 63.85  | _(ac)GDS(ph)DDEYDRR_             | 2 | 675.236  | 0.13 |
| 934  | IPI00291607  | ITPR3    | 0.96 | 1 | S | 4.38E-10   | 100.58 | _KQS(ph)VFSAPLSAGASAAEPL<br>DR_  | 2 | 1135.047 | 0.13 |
| 250  | IPI00419249; | PSMA3    | 1    | 1 | S | 2.09E-42   | 213.69 | _ESLKEEDS(ph)DDDNM(ox)_          | 2 | 876.296  | 0.13 |
| 83   | IPI00028888; | HNRNPD   | 0.92 | 1 | S | 5.84E-83   | 251.61 | _IDASKNEEDEGHSSNS(ph)PR_         | 2 | 1026.419 | 0.13 |
| 214  | IPI00418471; | VIM      | 1    | 1 | S | 0.060343   | 108.14 | _QVDNAS(ph)LAR_                  | 2 | 584.753  | 0.13 |
| 66   | IPI00396015; | ACACA    | 1    | 1 | S | 2.13E-10   | 109.65 | _FIIGSVSEDNS(ph)EDEISNLVK_       | 2 | 1138.023 | 0.13 |
| 31   | IPI00022228; | HDLBP    | 1    | 1 | S | 0.00737446 | 73.116 | _VATLNS(ph)EEESDPPTYK_           | 2 | 930.401  | 0.13 |
| 308  | IPI00008274; | CAP1     | 0.89 | 1 | S | 1.61E-29   | 163.43 | _PQTS(ph)PSPKR_                  | 2 | 539.258  | 0.13 |
| 511  | IPI00410287; | PRKAA1   | 0.94 | 1 | S | 0.012792   | 128.52 | _SGS(ph)VSNYR_                   | 2 | 475.192  | 0.13 |
| 203  | IPI00908318; | OXR1     | 0.85 | 1 | T | 5.04E-08   | 117.38 | _VVSST(ph)SEEEAFTEK_             | 2 | 876.367  | 0.14 |
| 432  | IPI00170778  | FNBP4    | 0.99 | 1 | S | 0.00897529 | 84.823 | _ALEEGDGSVSGSS(ph)PR_            | 2 | 764.32   | 0.14 |
| 298  | IPI00168849; | TRIP10   | 0.94 | 2 | S | 0.00065477 | 83.606 | _APSDS(ph)SLGTPS(ph)DGRPEL<br>R_ | 2 | 1001.419 | 0.14 |
| 563  | IPI00419847; | SORBS3   | 0.86 | 1 | S | 0.0738263  | 60.018 | _SPADPTDLGGQTS(ph)PR_            | 2 | 789.843  | 0.14 |
| 41   | IPI00922181; | MCM2     | 0.91 | 1 | S | 0.00317762 | 89.162 | _RTDALTS(ph)PGR_                 | 2 | 620.788  | 0.14 |
| 255  | IPI00414676; | HSP90AB1 | 1    | 1 | S | 1.70E-53   | 228.19 | _IEDVGS(ph)DEEDDSGK_             | 2 | 787.791  | 0.14 |
| 47   | IPI00329692; | NMT1     | 1    | 1 | S | 8.98E-06   | 115.98 | _GGLS(ph)PANDTGAK_               | 2 | 584.256  | 0.15 |
| 1982 | IPI00782992; | SRRM2    | 1    | 3 | S | 0.058478   | 84.997 | _S(ph)RS(ph)RT(ph)SPVTR_         | 2 | 693.77   | 0.15 |
| 197  | IPI00107104  | CXorf26  | 1    | 1 | S | 0.209319   | 47.469 | _GADS(ph)GEEKEEGINR_             | 2 | 785.823  | 0.16 |

|      |              |         |      |   |   |            |        |                                       |   |          |      |
|------|--------------|---------|------|---|---|------------|--------|---------------------------------------|---|----------|------|
| 167  | IPI00176903; | PTRF    | 0.96 | 1 | S | 0.00020617 | 145.18 | _LPAKLS(ph)ISK_                       | 2 | 518.794  | 0.16 |
| 24   | IPI00746455; | FARP1   | 0.95 | 1 | T | 1.79E-06   | 113.06 | _LGAPENSGIST(ph)LER_                  | 2 | 762.359  | 0.17 |
| 257  | IPI00104050  | THRAP3  | 0.99 | 2 | S | 0.0023183  | 84.15  | _ERS(ph)PALKSPLQS(ph)VVVR_            | 2 | 963.484  | 0.17 |
| 751  | IPI00409590; | LMO7    | 0.99 | 1 | S | 0.00160637 | 96.193 | _RKS(ph)YTSDLQK_                      | 2 | 653.314  | 0.17 |
| 2040 | IPI00298994  | TLN1    | 1    | 1 | S | 0.00081819 | 93.536 | _VLVQNAAGS(ph)QEK_                    | 2 | 662.319  | 0.17 |
| 32   | IPI00008711  | WFS1    | 1    | 1 | S | 6.54E-05   | 136.96 | _LNATAS(ph)LEQER_                     | 2 | 656.301  | 0.18 |
| 71   | IPI00012545; | TGOLN2  | 1    | 1 | S | 8.62E-57   | 215.32 | _DSPSKSS(ph)AEAQTPEPTPNK_             | 2 | 1034.939 | 0.18 |
| 6    | IPI00759683; | CAV1    | 1    | 1 | S | 5.04E-08   | 117.38 | _(ac)ADELS(ph)EKQVYDAHTK_             | 2 | 928.409  | 0.18 |
| 135  | IPI00011268; | RALY    | 1    | 1 | S | 0.0582156  | 96.193 | _GRSL(ph)PVPVPR_                      | 2 | 579.313  | 0.18 |
| 1549 | IPI00413362; | SIPA1L1 | 0.94 | 1 | S | 7.70E-11   | 143.95 | _LIDLES(ph)PTPESQK_                   | 2 | 768.863  | 0.18 |
| 431  | IPI00000015  | SFRS4   | 1    | 1 | S | 0.00251508 | 82.056 | _EGRGES(ph)ENAGTNQETR_                | 2 | 907.869  | 0.18 |
| 80   | IPI00180404; | NEXN    | 1    | 1 | S | 0.00027174 | 102.36 | _EM(ox)LAS(ph)DDEEDVSSK_              | 2 | 825.808  | 0.18 |
| 10   | IPI00829992  | MYO1C   | 1    | 1 | S | 8.69E-05   | 108.14 | _ASALGS(ph)DGVR_                      | 2 | 506.727  | 0.18 |
| 9    | IPI00796864; | DPM1    | 1    | 1 | S | 0.0582156  | 96.193 | _(ac)ASLEVSRS(ph)PR_                  | 2 | 612.293  | 0.18 |
| 45   | IPI00304409  | CARHSP1 | 0.77 | 3 | T | 0.00102008 | 112.01 | _ERS(ph)PSPLRGNVVPV(ph)PLP<br>T(ph)R_ | 2 | 1150.024 | 0.19 |
| 204  | IPI00018195; | MAPK3   | 0.85 | 1 | Y | 0.00679166 | 69.159 | _IADPEHDHTGFLTEY(ph)VATR_             | 3 | 751.339  | 0.19 |
| 2115 | IPI00871932; | SPTBN1  | 1    | 1 | S | 2.11E-15   | 176.78 | _RPPS(ph)PEPSTK_                      | 2 | 588.276  | 0.19 |
| 454  | IPI00013290; | HDGFRP2 | 1    | 1 | S | 0.0547288  | 87.033 | _KRS(ph)EGFSMDR_                      | 3 | 431.52   | 0.2  |
| 4908 | IPI00021812; | AHNAK   | 1    | 1 | S | 0.00160637 | 96.193 | _M(ox)PS(ph)LEISAPK_                  | 2 | 584.77   | 0.2  |
| 405  | IPI00029601; | CTTN    | 1    | 2 | S | 6.54E-28   | 177.71 | _T(ph)QTPPVS(ph)PAPQPTEER             | 2 | 947.903  | 0.2  |
| 450  | IPI00328293; | SRRM1   | 0.95 | 1 | S | 6.54E-05   | 136.96 | _RESPS(ph)PAPKPR_                     | 2 | 651.322  | 0.2  |
| 16   | IPI00012268; | PSMD2   | 1    | 1 | S | 2.32E-25   | 132.79 | _DKAPVQPQQS(ph)PAAAPGGT               | 3 | 847.738  | 0.2  |
| 752  | IPI00328293; | SRRM1   | 0.94 | 1 | S | 5.67E-06   | 112.01 | _KAASPS(ph)PQSVR_                     | 2 | 604.295  | 0.2  |
| 122  | IPI00296526; | NAGK    | 0.99 | 1 | S | 0.00139945 | 91.397 | _SLGLSLS(ph)GGDQEDAGR_                | 2 | 821.359  | 0.2  |
| 383  | IPI00032064; | AKAP2   | 0.99 | 1 | S | 5.50E-09   | 98.422 | _DALGDSLQVPVS(ph)PSSTTSSR             | 3 | 695.323  | 0.21 |
| 313  | IPI00304740; | ITSN1   | 0.77 | 1 | S | 3.12E-05   | 106.79 | _S(ph)GSGISVISSTSVQDR_                | 2 | 830.383  | 0.21 |
| 2409 | IPI00289819; | IGF2R   | 1    | 1 | S | 6.66E-16   | 114.08 | _ALSSLHGDDQDS(ph)EDEVLTIP<br>EVK_     | 2 | 1289.084 | 0.21 |

|      |              |          |      |   |   |            |        |                                                        |   |          |      |
|------|--------------|----------|------|---|---|------------|--------|--------------------------------------------------------|---|----------|------|
| 352  | IPI00012545; | TGOLN2   | 0.91 | 1 | S | 0.0100785  | 84.823 | _MSGSSASS(ph)ENR_                                      | 2 | 553.203  | 0.22 |
| 86   | IPI00044683; | ALS2CR4  | 1    | 1 | S | 0.0542305  | 68.459 | _RPS(ph)EGNEPSTK_                                      | 2 | 641.277  | 0.22 |
| 327  | IPI00009146  | TRAFD1   | 0.82 | 1 | S | 0.14472    | 50.855 | _ALPSLNTGSSS(ph)PR_                                    | 2 | 683.822  | 0.22 |
| 600  | IPI00479424; | KLC1     | 1    | 1 | S | 3.97E-06   | 127.93 | _ASS(ph)LNVLNVGGK_                                     | 2 | 619.811  | 0.23 |
| 82   | IPI00025512; | HSPB1    | 1    | 1 | S | 0.060343   | 108.14 | _QLS(ph)SGVSEIR_                                       | 2 | 578.274  | 0.23 |
| 249  | IPI00328868; | HS1BP3   | 0.99 | 1 | S | 1.24E-05   | 91.235 | _KLS(ph)PQDPSEDVSSVDPLK_<br>_GLFS(ph)DEESEDLFSSQSASK   | 3 | 674.321  | 0.23 |
| 539  | IPI00792422; | FAM21A   | 1    | 1 | S | 2.48E-49   | 194.68 | _                                                      | 2 | 1129.455 | 0.23 |
| 392  | IPI00885104; | MPHOSPH8 | 1    | 1 | S | 0.163614   | 97.769 | _RLS(ph)GEER_                                          | 2 | 463.708  | 0.24 |
| 842  | IPI00856045; | AHNAK2   | 1    | 1 | S | 0.0465702  | 68.459 | _M(ox)PS(ph)FGVSAPGK_                                  | 2 | 587.254  | 0.24 |
| 252  | IPI00292953; | RAI14    | 0.89 | 1 | T | 0.0170283  | 72.844 | _ISQDADLKT(ph)PTKPK_                                   | 2 | 811.413  | 0.24 |
| 30   | IPI00549564; | ACSS2    | 1    | 1 | S | 0.0582156  | 96.193 | _SWS(ph)PPPEVSR_                                       | 2 | 611.269  | 0.24 |
| 509  | IPI00394838; | ACLY     | 1    | 1 | S | 3.12E-05   | 106.79 | _TAS(ph)FSESR_                                         | 2 | 482.692  | 0.25 |
| 310  | IPI00008274; | CAP1     | 0.85 | 1 | S | 1.61E-29   | 163.43 | _SGPKPFSAPKQTPSPS(ph)PK_<br>_AAPEASS(ph)PPAS(ph)PLQHLL | 3 | 639.987  | 0.25 |
| 692  | IPI00647286; | C9orf88  | 0.86 | 2 | S | 0.0603246  | 60.547 | PGK_<br>_KLEKEEEEGISQES(ph)S(ph)EEE                    | 2 | 1064.497 | 0.25 |
| 117  | IPI00442843; | HMGA1    | 1    | 2 | S | 1.57E-05   | 82.838 | Q_<br>_KLEKEEEEGISQES(ph)S(ph)EEE                      | 3 | 799.647  | 0.25 |
| 116  | IPI00442843; | HMGA1    | 1    | 2 | S | 1.57E-05   | 82.838 | Q_                                                     | 3 | 799.647  | 0.25 |
| 52   | IPI00219446; | PEBP1    | 0.97 | 1 | S | 0.00801416 | 86.822 | _NRPTS(ph)ISWDGLDSGK_                                  | 2 | 856.886  | 0.25 |
| 321  | IPI00301421; | ZC3HC1   | 1    | 1 | S | 0.139938   | 63.85  | _LPLVPES(ph)PRR_<br>_GLFS(ph)DEESEDLFSSQSASN           | 2 | 622.332  | 0.25 |
| 539  | IPI00514705; | FAM21C   | 1    | 1 | S | 0.0342424  | 46.911 | LK_                                                    | 2 | 1243.018 | 0.26 |
| 369  | IPI00295542; | NUCB1    | 1    | 1 | S | 7.70E-11   | 143.95 | _AQRSL(ph)QETEALGR_                                    | 3 | 513.582  | 0.26 |
| 94   | IPI00243221; | NRD1     | 0.99 | 1 | S | 7.79E-10   | 124.18 | _RGS(ph)LSNAGDPEIVK_<br>_AKTQT(ph)PPVS(ph)PAPQPTE      | 2 | 761.867  | 0.26 |
| 401  | IPI00029601; | CTTN     | 1    | 2 | T | 6.54E-28   | 177.71 | ER_                                                    | 2 | 1047.469 | 0.26 |
| 2257 | IPI00020356; | MAP1A    | 1    | 2 | S | 8.56E-11   | 128.36 | _NTSAEKELSS(ph)PIS(ph)PK_                              | 2 | 874.381  | 0.27 |
| 1354 | IPI00336047; | MYO9B    | 0.92 | 1 | S | 0.00115368 | 100.32 | _RTS(ph)FSTSDVSK_                                      | 2 | 647.787  | 0.27 |
| 24   | IPI00033600; | PPP1R7   | 1    | 2 | S | 1.72E-06   | 113.22 | _RVES(ph)EES(ph)GDEEGKK_                               | 3 | 580.224  | 0.27 |
| 93   | IPI00290110; | PDCD4    | 0.92 | 1 | T | 0.00081819 | 93.536 | _SGLTVPT(ph)SPKGR_                                     | 2 | 640.324  | 0.27 |
| 604  | IPI00789551; | MATR3    | 0.98 | 1 | S | 0.00576649 | 92.082 | _SYSPDGKES(ph)PSDKK_                                   | 2 | 802.846  | 0.27 |



|      |              |          |      |   |   |            |        |                                                   |   |          |      |
|------|--------------|----------|------|---|---|------------|--------|---------------------------------------------------|---|----------|------|
| 8    | IPI00402231; | DNAJC5   | 0.97 | 1 | S | 3.43E-09   | 121.73 | _S(ph)LSTSGESLYHVLGLDK_                           | 2 | 943.451  | 0.27 |
| 273  | IPI00218260; | NFIX     | 0.99 | 1 | S | 0.0806051  | 58.94  | _S(ph)ITSPSTSTTK_                                 | 2 | 643.797  | 0.28 |
| 944  | IPI00658152; | TNS3     | 0.81 | 1 | S | 0.0281936  | 130.93 | _RESSSS(ph)AER_<br>_REEDEPEERS(ph)GDETPGSEVP      | 2 | 544.722  | 0.28 |
| 161  | IPI00456887; | HNRNPUL2 | 1    | 1 | S | 3.30E-05   | 79.087 | GDK_                                              | 3 | 875.359  | 0.28 |
| 448  | IPI00328293; | SRRM1    | 1    | 1 | S | 6.54E-05   | 136.96 | _RES(ph)PSPAPKPR_                                 | 3 | 434.55   | 0.28 |
| 1443 | IPI00009342  | IQGAP1   | 1    | 1 | S | 0.117215   | 54.649 | _S(ph)VKEDSNLTLEK_                                | 2 | 785.872  | 0.29 |
| 95   | IPI00297579  | CBX3     | 1    | 1 | S | 1.33E-33   | 208.96 | _KSLS(ph)DSESDSK_                                 | 2 | 689.275  | 0.29 |
| 285  | IPI00100199; | CYBRD1   | 0.94 | 1 | T | 7.44E-10   | 131.77 | _NLALDEAGQRST(ph)M(ox)_                           | 2 | 751.321  | 0.3  |
| 524  | IPI00479424; | KLC1     | 0.98 | 1 | S | 5.98E-07   | 150.24 | _SRES(ph)LNVDVVK_                                 | 2 | 663.327  | 0.3  |
| 1076 | IPI00157757; | MICAL1   | 1    | 1 | S | 0.00035686 | 97.936 | _RLS(ph)ELALGTGAQG_                               | 2 | 676.832  | 0.3  |
| 1227 | IPI00917650; | FAM38A   | 1    | 1 | S | 0.0281936  | 130.93 | _TAS(ph)ELLDDR_                                   | 2 | 549.266  | 0.31 |
| 1779 | IPI00008868  | MAP1B    | 1    | 1 | S | 6.63E-13   | 166.7  | _VQSLEGEKLS(ph)PK_                                | 2 | 697.85   | 0.31 |
| 306  | IPI00218487; | GJA1     | 1    | 1 | S | 0.00251508 | 82.056 | _QAS(ph)EQNWANYSAEQNR_                            | 2 | 988.4    | 0.31 |
| 652  | IPI00021405; | LMNA     | 0.94 | 1 | S | 0.0878364  | 74.948 | _SYLLGNSS(ph)PR_<br>_KPSLVSDLPWEGAAPQS(ph)PS      | 2 | 587.269  | 0.32 |
| 222  | IPI00009505; | SNTB2    | 0.97 | 1 | S | 3.51E-17   | 102.48 | FSGSEDSGSPK_                                      | 3 | 1042.143 | 0.32 |
| 38   | IPI00479997; | STMN1    | 1    | 1 | S | 0.00849733 | 72.844 | _SKESVPEFPLS(ph)PPK_<br>_GQKS(ph)PGALETPSAAGSQGN  | 2 | 811.397  | 0.32 |
| 624  | IPI00032064; | AKAP2    | 0.98 | 1 | S | 7.98E-07   | 80.066 | TASQ GK_                                          | 3 | 803.706  | 0.32 |
| 162  | IPI00017842; | TP53I11  | 1    | 1 | S | 0.0587974  | 84.823 | _KHS(ph)QTDLVS_                                   | 2 | 625.798  | 0.33 |
| 2    | IPI00911094; | DAP      | 0.78 | 1 | S | 0.04127    | 74.039 | _(ac)S(ph)SPPEGKLETK_<br>_ALPAAAEDGS(ph)PVFEGGPPS | 2 | 647.8    | 0.33 |
| 1107 | IPI00743456; | GPR124   | 1    | 1 | S | 1.41E-11   | 104.95 | LK_<br>_VAAAAGSGPS(ph)PPGS(ph)PG                  | 2 | 1045.496 | 0.33 |
| 47   | IPI00020124  | PI4K2A   | 1    | 2 | S | 1.18E-05   | 85.495 | HDRER_<br>_VAAAAGSGPS(ph)PPGS(ph)PG               | 3 | 711.635  | 0.33 |
| 51   | IPI00020124  | PI4K2A   | 1    | 2 | S | 1.18E-05   | 85.495 | HDRER_<br>_AAPEASS(ph)PPAS(ph)PLQHLL              | 3 | 711.635  | 0.33 |
| 696  | IPI00647286; | C9orf88  | 1    | 2 | S | 0.0603246  | 60.547 | PGK_                                              | 2 | 1064.497 | 0.34 |
| 212  | IPI00021812  | AHNAK    | 0.99 | 1 | S | 7.20E-35   | 175.05 | _LPSGS(ph)GAASPTGSAVDIR_                          | 2 | 861.907  | 0.34 |
| 7    | IPI00647400  | RNPEP    | 1    | 1 | S | 7.70E-11   | 143.95 | _(ac)ASGEHS(ph)PGSGAAR_                           | 2 | 653.265  | 0.35 |
| 693  | IPI00018274; | EGFR     | 0.99 | 1 | T | 1.66E-15   | 134.89 | _ELVEPLT(ph)PSGEAPNQALLR_                         | 2 | 1057.53  | 0.35 |

|      |              |         |      |   |   |            |        |                                              |   |          |      |
|------|--------------|---------|------|---|---|------------|--------|----------------------------------------------|---|----------|------|
| 4    | IPI00247063; | MME     | 1    | 1 | S | 7.55E-41   | 191.18 | _GKS(ph)ESQMDITDINTPKPK_                     | 3 | 690.326  | 0.35 |
| 835  | IPI00442274  | NFXL1   | 1    | 1 | S | 0.00317762 | 89.162 | _KAS(ph)EIKEAEAK_                            | 2 | 642.316  | 0.35 |
| 296  | IPI00807625; | FNBP1   | 1    | 1 | S | 5.67E-06   | 112.01 | _TVS(ph)DNSLSNSR_<br>_GLAEVQQDGEAEEGATS(ph)D | 2 | 630.267  | 0.35 |
| 598  | IPI00217683; | AKAP12  | 0.99 | 1 | S | 3.55E-21   | 143.72 | GEK_                                         | 2 | 1100.45  | 0.36 |
| 1216 | IPI00925413; | EIF4G1  | 0.85 | 1 | S | 0.00317762 | 89.162 | _AAS(ph)LTEDRDR_                             | 2 | 607.264  | 0.36 |
| 1757 | IPI00292771; | NUMA1   | 1    | 1 | S | 1.31E-34   | 167.52 | _TQPDGTSVPGEPAS(ph)PISQR_                    | 2 | 1002.457 | 0.37 |
| 1003 | IPI00782992; | SRRM2   | 1    | 1 | T | 0.0588821  | 59.283 | _AQT(ph)PPGPSLSGSK_                          | 2 | 653.806  | 0.37 |
| 5731 | IPI00021812; | AHNAK   | 1    | 1 | S | 1.14E-45   | 208.55 | _GGVTGS(ph)PEASISGSK_                        | 2 | 707.317  | 0.37 |
| 668  | IPI00400812; | SSFA2   | 1    | 1 | S | 0.00069284 | 100.94 | _SLAS(ph)IEAK_                               | 2 | 449.718  | 0.38 |
| 1331 | IPI00217683; | AKAP12  | 1    | 1 | S | 0.012792   | 128.52 | _SPPS(ph)PVER_                               | 2 | 474.713  | 0.38 |
| 563  | IPI00411937  | NOP56   | 0.93 | 1 | S | 0.0257447  | 60.547 | _KFS(ph)KEEPVSSGPEEAVGK_                     | 3 | 662.314  | 0.38 |
| 97   | IPI00411356  | VPS4A   | 0.8  | 1 | S | 0.0170283  | 72.844 | _GSDS(ph)DSEGDNPEKK_                         | 2 | 772.791  | 0.38 |
| 365  | IPI00180404; | NEXN    | 0.97 | 1 | S | 0.00317762 | 89.162 | _TIS(ph)QEFLTPGK_                            | 2 | 650.813  | 0.39 |
| 1022 | IPI00179757; | KIF1C   | 1    | 1 | S | 0.00892842 | 110.05 | _RPPS(ph)PR_<br>_KLEKEEEEGIS(ph)QES(ph)S(ph) | 2 | 395.192  | 0.4  |
| 113  | IPI00442843; | HMGA1   | 1    | 3 | S | 1.57E-05   | 82.838 | )EEEEQ_<br>_TEATQGLDYVPSAGTIS(ph)PTS(        | 2 | 1238.95  | 0.41 |
| 1134 | IPI00020356; | MAP1A   | 0.83 | 2 | S | 9.65E-10   | 81.365 | ph)SLEEDKGFK_                                | 3 | 1063.47  | 0.41 |
| 142  | IPI00513853; | STX12   | 1    | 1 | S | 0.0587974  | 84.823 | _AGSRLS(ph)AEER_                             | 2 | 578.261  | 0.41 |
| 277  | IPI00021405; | LMNA    | 1    | 1 | S | 0.0587974  | 84.823 | _LDNARQS(ph)AER_                             | 2 | 620.278  | 0.42 |
| 108  | IPI00010204; | SFRS3   | 1    | 1 | S | 0.163614   | 97.769 | _RRS(ph)PPPR_                                | 2 | 473.243  | 0.43 |
| 137  | IPI00006865  | SEC22B  | 1    | 1 | S | 4.71E-69   | 244.75 | _RNLGS(ph)INTELQDVQR_                        | 2 | 911.944  | 0.43 |
| 1721 | IPI00014898; | PLEC1   | 1    | 1 | S | 0.0719115  | 72.206 | _RAS(ph)FAEK_                                | 2 | 444.702  | 0.44 |
| 326  | IPI00303195; | SYNC    | 1    | 1 | S | 0.0168101  | 82.241 | _RLS(ph)AQFENLMAESR_                         | 2 | 866.398  | 0.44 |
| 1346 | IPI00336047; | MYO9B   | 0.9  | 1 | T | 0.0260507  | 73.06  | _ATGAALT(ph)PTEER_                           | 2 | 648.795  | 0.44 |
| 27   | IPI00033600; | PPP1R7  | 1    | 1 | S | 0.00576649 | 92.082 | _RVESEES(ph)GDEEGKK_                         | 3 | 553.568  | 0.45 |
| 171  | IPI00442038; | IL16    | 1    | 1 | S | 0.032903   | 74.039 | _QPYSLCS(ph)NRK_                             | 2 | 666.792  | 0.45 |
| 750  | IPI00021129  | AP3B1   | 1    | 2 | S | 0.0244449  | 67.165 | _GKS(ph)DS(ph)EDGEKENEK_                     | 2 | 856.308  | 0.45 |
| 752  | IPI00021129  | AP3B1   | 1    | 2 | S | 0.0244449  | 67.165 | _GKS(ph)DS(ph)EDGEKENEK_                     | 2 | 856.308  | 0.45 |
| 672  | IPI00104050  | THRAP3  | 1    | 1 | S | 0.144934   | 120.67 | _NKKS(ph)PEIHR_                              | 2 | 594.798  | 0.46 |
| 130  | IPI00303882  | M6PRBP1 | 0.83 | 1 | S | 0.172366   | 48.846 | _ELVSSKVS(ph)GAQEMVSSAK_                     | 2 | 958.955  | 0.46 |

|      |              |         |      |   |   |            |        |                          |   |          |      |
|------|--------------|---------|------|---|---|------------|--------|--------------------------|---|----------|------|
| 195  | IPI00789551; | MATR3   | 0.88 | 1 | S | 0.0356565  | 45.13  | _RDSFDDRGPS(ph)LNPVLDYDH | 4 | 650.29   | 0.48 |
| 51   | IPI00020567  | ARHGAP1 | 0.98 | 1 | S | 0.0198933  | 80.535 | GSR_                     | 3 | 426.543  | 0.5  |
| 14   | IPI00294501  | DHCR7   | 1    | 1 | S | 0.0542305  | 68.459 | _SSS(ph)PELVTHLK_        | 2 | 628.288  | 0.51 |
| 19   | IPI00021405; | LMNA    | 0.98 | 1 | T | 0.00576649 | 92.082 | _AKS(ph)LDGVTNDR_        | 2 | 720.33   | 0.51 |
| 499  | IPI00168336; | LEMD2   | 0.99 | 1 | S | 1.52E-05   | 104.52 | _SGAQASST(ph)PLSPTR_     | 2 | 753.817  | 0.52 |
| 27   | IPI00479018; | SDCBP   | 1    | 1 | S | 0.186767   | 50.855 | _WTKPSSF(ph)DSER_        | 2 | 814.895  | 0.53 |
| 710  | IPI00007334; | ACIN1   | 1    | 1 | S | 0.0295307  | 120.67 | _(ac)SLYPS(ph)LEDLKVDK_  | 2 | 612.785  | 0.53 |
| 1084 | IPI00333541; | FLNA    | 1    | 1 | S | 0.00251508 | 82.056 | _RLS(ph)QPESAEK_         | 2 | 755.346  | 0.54 |
| 507  | IPI00394838; | ACLY    | 0.79 | 1 | T | 3.12E-05   | 106.79 | _AFGPGQLQGGAGS(ph)PAR_   | 2 | 873.391  | 0.54 |
| 73   | IPI00418471  | VIM     | 0.92 | 1 | S | 0.181464   | 117.35 | _T(ph)ASFESRADEVAPAK_    | 3 | 350.853  | 0.54 |
| 436  | IPI00031023; | FLII    | 1    | 1 | S | 0.00115368 | 100.32 | _LRSS(ph)VPGVR_          | 2 | 671.293  | 0.54 |
| 11   | IPI00290461; | EIF3J   | 0.88 | 1 | S | 1.86E-15   | 109.69 | _RKDS(ph)AQDDQAK_        | 3 | 905.724  | 0.54 |
| 5752 | IPI00021812; | AHNAK   | 1    | 1 | S | 3.64E-38   | 187    | _(ac)AAAAAAGDS(ph)DSWDA  | 2 | 906.899  | 0.55 |
| 5077 | IPI00021812; | AHNAK   | 1    | 1 | S | 0.00029834 | 126.79 | DAFSVEDPVRK_             | 2 | 426.715  | 0.55 |
| 174  | IPI00021048; | MYOF    | 1    | 1 | S | 4.96E-13   | 156.57 | _ASLGS(ph)LEGEAEAEASSPK_ | 2 | 682.832  | 0.55 |
| 624  | IPI00025202; | FMNL1   | 1    | 1 | S | 0.060343   | 108.14 | _VDVKS(ph)PK_            | 2 | 569.269  | 0.58 |
| 188  | IPI00789551; | MATR3   | 1    | 1 | S | 0.0204923  | 111.83 | _GPVGTVS(ph)EAQLAR_      | 2 | 495.687  | 0.59 |
| 625  | IPI00742944  | FMN2    | 1    | 1 | S | 0.00059706 | 120.67 | _RDS(ph)ELGPGVK_         | 2 | 657.772  | 0.59 |
| 216  | IPI00021812  | AHNAK   | 0.89 | 1 | S | 7.20E-35   | 175.05 | _RDS(ph)FDDR_            | 2 | 861.907  | 0.59 |
| 395  | IPI00021405; | LMNA    | 1    | 2 | S | 1.94E-05   | 141.09 | _S(ph)ADWTEELGAR_        | 2 | 701.318  | 0.6  |
| 112  | IPI00018798  | DNAJC17 | 1    | 1 | S | 0.0168101  | 82.241 | _LPSGGAAS(ph)PTGSAVDIR_  | 2 | 865.331  | 0.6  |
| 705  | IPI00856098; | RRBP1   | 0.9  | 1 | S | 0.0465702  | 68.459 | _LRLS(ph)PSPTS(ph)QR_    | 2 | 599.279  | 0.61 |
| 1987 | IPI00782992; | SRRM2   | 0.96 | 1 | S | 0.130392   | 114.35 | _QAQAQES(ph)EEEEESR_     | 2 | 492.237  | 0.61 |
| 2026 | IPI00292771; | NUMA1   | 0.89 | 1 | S | 0.139938   | 63.85  | _KAEGSPS(ph)EGKK_        | 2 | 614.8    | 0.62 |
| 72   | IPI00418471  | VIM     | 0.95 | 1 | S | 0.181464   | 117.35 | _SRTS(ph)PVTR_           | 2 | 525.776  | 0.62 |
| 210  | IPI00021812  | AHNAK   | 1    | 1 | S | 7.20E-35   | 175.05 | _KQS(ph)TTEAQKK_         | 2 | 861.907  | 0.62 |
| 104  | IPI00216308; | VDAC1   | 0.98 | 1 | S | 0.00576649 | 92.082 | _LRS(ph)SVPGVR_          | 2 | 804.869  | 0.63 |
| 893  | IPI00856116; | PALLD   | 1    | 1 | S | 2.48E-49   | 194.68 | _LPS(ph)GSGAASPTGSAVDIR_ | 2 | 635.782  | 0.63 |
| 15   | IPI00024976  | TOMM22  | 1    | 1 | S | 1.41E-11   | 104.95 | _LTFDSSF(ph)PNTGKK_      | 2 | 1042.999 | 0.64 |
| 136  | IPI00022477  | BCL10   | 0.83 | 1 | S | 0.00108315 | 96.193 | _IAS(ph)DEEIQGTK_        | 2 | 662.24   | 0.64 |
|      |              |         |      |   |   |            |        | _(ac)AAAVAAAGAGEPQS(ph)P |   |          |      |
|      |              |         |      |   |   |            |        | DELLPK_                  |   |          |      |
|      |              |         |      |   |   |            |        | _S(ph)NSDESINFSEK_       |   |          |      |

|      |              |          |      |   |   |            |        |                           |   |         |      |
|------|--------------|----------|------|---|---|------------|--------|---------------------------|---|---------|------|
| 93   | IPI00297579  | CBX3     | 0.99 | 1 | S | 1.33E-33   | 208.96 | _RKS(ph)LSDSESDDSK_       | 2 | 767.325 | 0.65 |
| 2336 | IPI00333541; | FLNA     | 1    | 1 | T | 3.34E-09   | 120.05 | _RLT(ph)VSSLQESGLK_       | 2 | 749.387 | 0.65 |
| 243  | IPI00104050  | THRAP3   | 1    | 1 | S | 0.0295307  | 120.67 | _ASAVSELS(ph)PR_          | 2 | 548.755 | 0.65 |
| 29   | IPI00791060; | MERIT40  | 0.97 | 1 | S | 0.0265948  | 78.538 | _TRS(ph)NPEGAEDR_         | 2 | 656.27  | 0.69 |
| 15   | IPI00783313; | PYGL     | 1    | 1 | S | 0.204201   | 95.09  | _RQIS(ph)IR_              | 2 | 426.726 | 0.69 |
| 978  | IPI00024766  | PLXNC1   | 1    | 1 | S | 0.00521459 | 91.235 | _KQS(ph)QQELLESELRK_      | 3 | 636.998 | 0.69 |
| 4030 | IPI00014898; | PLEC1    | 1    | 1 | T | 0.0295307  | 120.67 | _QIT(ph)MEELVR_           | 2 | 599.781 | 0.71 |
| 59   | IPI00021369; | CRYAB    | 1    | 1 | S | 0.00035686 | 97.936 | _APS(ph)WFDTGLSEM(ox)R_   | 2 | 796.826 | 0.72 |
| 305  | IPI00336081; | MYLK     | 1    | 1 | S | 0.0200819  | 64.591 | _GGG(ph)PPWAANSQPQPPR_    | 2 | 863.888 | 0.74 |
| 516  | IPI00007675; | DYNC1L1  | 0.76 | 1 | S | 0.00027534 | 78.282 | _KPVTVSPTTPTS(ph)PTEGEAS_ | 2 | 983.456 | 0.74 |
| 25   | IPI00479997; | STMN1    | 1    | 1 | S | 0.0121282  | 77.654 | _ASGQAFELILS(ph)PR_       | 2 | 734.863 | 0.75 |
| 618  | IPI00020984  | CANX     | 1    | 1 | S | 8.98E-06   | 115.98 | _AEDEILNRS(ph)PR_         | 2 | 754.841 | 0.78 |
| 364  | IPI00413817  | SERINC1  | 0.97 | 1 | S | 0.00035686 | 97.936 | _SDGS(ph)LEDGDDVHR_       | 2 | 741.281 | 0.79 |
| 142  | IPI00794221; | DBN1     | 0.99 | 1 | S | 0.130392   | 114.35 | _LSS(ph)PVLHR_            | 2 | 494.752 | 0.81 |
| 135  | IPI00021812  | AHNAK    | 1    | 1 | S | 5.19E-34   | 183.28 | _LKS(ph)EDGVEGDLGETQSR_   | 2 | 950.42  | 0.83 |
| 406  | IPI00021405; | LMNA     | 0.86 | 1 | S | 1.61E-29   | 163.43 | _ASSHS(ph)SQTQGGGSVTK_    | 2 | 799.844 | 0.83 |
| 19   | IPI00438229; | TRIM28   | 0.75 | 1 | S | 0.166289   | 56.371 | _h)PGPGEGSAGGEKR_         | 3 | 889.067 | 0.84 |
| 575  | IPI00104050  | THRAP3   | 1    | 1 | S | 0.139938   | 63.85  | _M(ox)DS(ph)FDEDLAR_      | 2 | 647.737 | 0.84 |
| 184  | IPI00647915; | TAGLN2   | 1    | 1 | S | 0.00045484 | 124.22 | _NFS(ph)DNQLQEGK_         | 2 | 680.282 | 0.84 |
| 495  | IPI00646377; | EIF4G3   | 1    | 1 | S | 0.0170283  | 72.844 | _RS(ph)PVPAQIAITVPK_      | 2 | 778.932 | 0.85 |
| 691  | IPI00855787; | TNKS1BP1 | 0.97 | 1 | S | 0.149656   | 69.159 | _WLDDLAS(ph)PPPSGGGAR_    | 2 | 894.919 | 0.86 |
| 531  | IPI00006079; | BCLAF1   | 1    | 1 | S | 0.0907378  | 74.039 | _STFREES(ph)PLR_          | 2 | 651.298 | 0.9  |
| 794  | IPI00023649; | SBNO1    | 0.85 | 1 | S | 0.0453583  | 62.096 | _S(ph)IDPDSIQSALLASGLGSK_ | 2 | 969.975 | 0.93 |
| 199  | IPI00550181; | CHMP2B   | 1    | 1 | S | 0.0907378  | 74.039 | _ATIS(ph)DEEIER_          | 2 | 621.766 | 0.97 |
| 157  | IPI00395002; | HOMER3   | 0.78 | 1 | S | 1.52E-05   | 104.52 | _S(ph)QSADAPGPTER_        | 2 | 648.267 | 0.97 |
| 392  | IPI00021405; | LMNA     | 0.99 | 1 | S | 6.54E-05   | 136.96 | _LRLSPS(ph)PTSQR_         | 2 | 661.335 | 1.03 |
| 22   | IPI00021405; | LMNA     | 0.97 | 1 | S | 0.00576649 | 92.082 | _SGAQASSTPLS(ph)PTR_      | 2 | 720.33  | 1.07 |
| 2706 | IPI00782992; | SRRM2    | 0.9  | 1 | S | 0.139938   | 63.85  | _RRPSPQPS(ph)PR_          | 2 | 629.314 | 1.13 |
| 1121 | IPI00856116; | PALLD    | 1    | 1 | S | 1.95E-25   | 186.01 | _SRDS(ph)GDENEPIQER_      | 2 | 856.35  | 1.15 |

|      |              |         |      |   |   |           |        |                            |   |          |      |
|------|--------------|---------|------|---|---|-----------|--------|----------------------------|---|----------|------|
| 1435 | IPI00014898; | PLEC1   | 1    | 1 | S | 0.0265948 | 78.538 | _AQLEPVAS(ph)PAK_          | 2 | 595.794  | 1.16 |
| 698  | IPI00217683; | AKAP12  | 0.98 | 1 | S | 6.63E-13  | 166.7  | _RGSSS(ph)DEEGGPK_         | 2 | 643.256  | 1.17 |
| 697  | IPI00217683; | AKAP12  | 1    | 3 | S | 6.63E-13  | 166.7  | _RGS(ph)S(ph)S(ph)DEEGGPK_ | 2 | 723.223  | 1.17 |
| 256  | IPI00644297; | SKI2W   | 1    | 1 | S | 0.060343  | 108.14 | _ASS(ph)LEDLVLK_           | 2 | 577.789  | 1.2  |
| 525  | IPI00410488; | CD276   | 1    | 1 | S | 0.0121282 | 77.654 | _HSDS(ph)KEDDGQIEA_        | 2 | 755.788  | 1.2  |
| 418  | IPI00029601; | CTTN    | 0.99 | 1 | S | 7.27E-13  | 135.71 | _LPSS(ph)PVYEDAASFK_       | 2 | 795.858  | 1.28 |
| 423  | IPI00021405; | LMNA    | 1    | 1 | S | 0.130392  | 114.35 | _KLES(ph)TESR_             | 2 | 515.234  | 1.3  |
| 105  | IPI00008529; | RPLP2   | 1    | 1 | S | 5.19E-34  | 183.28 | _KEESEES(ph)DDDM(ox)GFGLF  | 2 | 1023.364 | 1.32 |
| 387  | IPI00742743; | TP53BP1 | 0.79 | 1 | T | 0.0121891 | 70.232 | D_                         | 2 | 906.414  | 1.35 |
| 403  | IPI00021405; | LMNA    | 0.88 | 1 | S | 1.61E-29  | 163.43 | _STPFIVPSSPT(ph)EQEGR_     | 2 | 799.844  | 1.41 |
| 349  | IPI00182540; | CTNND1  | 0.98 | 1 | S | 5.67E-06  | 112.01 | _AS(ph)SHSSQTQGGGSVTK_     | 2 | 613.811  | 1.46 |
| 560  | IPI00218694; | CALD1   | 0.97 | 1 | S | 0.140787  | 54.649 | _GSLAS(ph)LDLRLK_          | 2 | 684.842  | 1.46 |
| 404  | IPI00020513; | ZYX     | 1    | 1 | S | 0.0104449 | 84.823 | _QSVDKVTS(ph)PTKV_         | 2 | 559.286  | 1.51 |
| 404  | IPI00021405; | LMNA    | 0.94 | 1 | S | 1.61E-29  | 163.43 | _S(ph)PGAPGPLTK_           | 2 | 799.844  | 1.55 |
| 407  | IPI00021405; | LMNA    | 1    | 2 | S | 1.61E-29  | 163.43 | _ASS(ph)HSSQTQGGGSVTK_     | 2 | 839.827  | 1.58 |
| 471  | IPI00023191; | TOM1    | 0.84 | 1 | S | 7.92E-09  | 84.546 | _ASS(ph)HSS(ph)QTQGGGSVTK  | 2 | 859.082  | 1.58 |
| 199  | IPI00215884; | SFRS1   | 0.98 | 1 | S | 0.0179652 | 68.222 | _AADRLPNLSS(ph)PSAEGPPGPP  | 3 | 749.364  | 1.67 |
| 280  | IPI00396171; | MAP4    | 1    | 1 | S | 7.27E-13  | 135.71 | SGPAPR_                    | 2 | 822.384  | 2.07 |
| 463  | IPI00465428; | VPS13C  | 1    | 1 | S | 0.147929  | 59.232 | _VKVDGPRS(ph)PSYGR_        | 2 | 522.242  | 2.53 |
| 102  | IPI00008529; | RPLP2   | 1    | 1 | S | 5.19E-34  | 183.28 | _DM(ox)ES(ph)PTKLDVTLAK_   | 2 | 1015.367 | 2.7  |
| 565  | IPI00002790  | SEL1L   | 0.94 | 1 | S | 0.132176  | 51.98  | _KKS(ph)ADTGEK_            | 2 | 971.437  | 4.56 |
| 34   | IPI00887936  | CYorf16 | 1    | 1 | S | 0.0719115 | 72.206 | _KEES(ph)EESDDDMGFGLFD_    | 2 | 470.7    | 4.98 |
|      |              |         |      |   |   |           |        | _GRWSERLMTAYNS(ph)YK_      | 2 |          |      |
|      |              |         |      |   |   |           |        | _SPVS(ph)EWR_              | 2 |          |      |

**Supplementary table 6: Keratinocyte phosphorylation site dynamics during cell culture.** Phosphopeptides were purified from unlabeled keratinocytes (D1) and compared to phosphopeptides from labeled keratinocytes (D7) using MaxQuant.<sup>11</sup> Only sites with a localization probability >0.75 were considered (class I sites).<sup>12</sup> Peptides were identified with a false-discovery rate <1%. For details see experimental section.

| Position | Proteins    | Gene Names | Localization Prob | Number of Phospho sites (STY) | Amino Acid | PEP       | PTM Score | Modified Sequence                                       | Charge | m/z      | norm Log2 peptide ratio |
|----------|-------------|------------|-------------------|-------------------------------|------------|-----------|-----------|---------------------------------------------------------|--------|----------|-------------------------|
| 117      | IPI00442843 | HMGA1      | 0.89              | 1                             | S          | 0.001267  | 78.28     | _KLEKEEEEGISQESS(ph)EEEQ_                               | 2      | 1158.984 | -3.18                   |
| 5763     | IPI00021812 | AHNAK      | 0.99              | 1                             | S          | 7.57E-14  | 130.49    | _ASLGSLEGEAEAEASS(ph)PK_<br>_LLEGEDAHLSSSQFSSGSQSS(ph)R | 2      | 906.899  | -3.18                   |
| 438      | IPI00384444 | KRT14      | 0.84              | 1                             | S          | 7.16E-102 | 226.23    | _                                                       | 3      | 797.015  | -3.17                   |
| 116      | IPI00442843 | HMGA1      | 0.77              | 1                             | S          | 0.001267  | 78.28     | _KLEKEEEEGISQES(ph)SEEEQ_                               | 2      | 1158.984 | -2.97                   |
| 69       | IPI00604620 | NCL        | 0.92              | 1                             | T          | 0.0135935 | 128.52    | _KVVVSPT(ph)KK_                                         | 2      | 533.307  | -2.93                   |
| 548      | IPI00185919 | LARP1      | 0.99              | 1                             | S          | 1.06E-09  | 130.49    | _GLSAS(ph)LPDLSENWIEVK_                                 | 2      | 1026.980 | -2.85                   |
| 139      | IPI00555744 | RPL14      | 1.00              | 1                             | S          | 0.0789022 | 92.16     | _AALLKAS(ph)PK_                                         | 2      | 489.773  | -2.79                   |
| 633      | IPI00916405 | MLTK       | 1.00              | 1                             | S          | 0.0057324 | 78.54     | _YQQITPVNQS(ph)R_                                       | 2      | 707.330  | -2.71                   |
| 71       | IPI00015953 | DDX21      | 1.00              | 1                             | S          | 8.31E-06  | 97.94     | _KKAEPSEVDM(ox)NS(ph)PK_                                | 3      | 552.583  | -2.50                   |
| 38       | IPI00024933 | RPL12      | 1.00              | 1                             | S          | 0.161226  | 80.54     | _IGPLGLS(ph)PK_                                         | 2      | 481.260  | -2.46                   |
| 232      | IPI00012442 | G3BP1      | 0.93              | 1                             | S          | 3.23E-40  | 171.16    | _SSS(ph)PAPADIAQTVQEDLR_                                | 2      | 982.952  | -2.45                   |
| 127      | IPI00168885 | DHX57      | 1.00              | 1                             | S          | 2.60E-12  | 131.77    | _DLQEQQADAGS(ph)ER_                                     | 2      | 757.294  | -2.39                   |
| 38       | IPI00479997 | STMN1      | 1.00              | 1                             | S          | 0.133651  | 54.65     | _SKESVPEFPLS(ph)PPK_                                    | 2      | 811.397  | -2.38                   |
| 220      | IPI00021812 | AHNAK      | 0.83              | 1                             | S          | 8.02E-109 | 251.61    | _LPSGGAASPTGS(ph)AVDIR_                                 | 2      | 861.907  | -2.35                   |
| 241      | IPI00021840 | RPS6       | 0.89              | 1                             | T          | 0.0038145 | 108.14    | _LSSLRAST(ph)SK_                                        | 2      | 565.284  | -2.30                   |
| 205      | IPI00003843 | TJP2       | 1.00              | 1                             | S          | 0.0020986 | 130.93    | _SWEDS(ph)PER_                                          | 2      | 543.200  | -2.27                   |
| 155      | IPI00005264 | PKP2       | 0.99              | 1                             | S          | 1.44E-08  | 115.98    | _LEISPDSS(ph)PER_                                       | 2      | 655.287  | -2.23                   |
| 135      | IPI00021812 | AHNAK      | 1.00              | 1                             | S          | 3.21E-66  | 208.55    | _LKS(ph)EDGVEGDLGETQSR_                                 | 2      | 950.420  | -2.21                   |
| 511      | IPI00021812 | AHNAK      | 0.96              | 1                             | S          | 0.136973  | 47.47     | _ISM(ox)QDVDSLGS(ph)PK_                                 | 2      | 793.363  | -2.20                   |
| 89       | IPI00015953 | DDX21      | 1.00              | 1                             | S          | 0.002226  | 87.56     | _KKEEPSQNDIS(ph)PK_                                     | 2      | 790.372  | -2.16                   |
| 521      | IPI00185919 | LARP1      | 0.91              | 1                             | S          | 0.859179  | 24.20     | _ETESAPGS(ph)PR_                                        | 2      | 555.727  | -2.14                   |
| 67       | IPI00604620 | NCL        | 1.00              | 1                             | S          | 0.0135935 | 128.52    | _KVVVS(ph)PTK_                                          | 2      | 469.260  | -2.14                   |
| 563      | IPI00604620 | NCL        | 1.00              | 1                             | S          | 0.0656179 | 59.28     | _LELQGPRGS(ph)PNAR_                                     | 2      | 737.862  | -2.08                   |
| 5841     | IPI00021812 | AHNAK      | 0.97              | 1                             | S          | 0.0633808 | 55.44     | _GHYEVTS(ph)DDETGK_                                     | 2      | 787.804  | -2.02                   |
| 224      | IPI00011253 | RPS3       | 0.79              | 1                             | S          | 0.42736   | 42.96     | _DEILPTTPIIS(ph)EQK_<br>_(ac)SETAPAAPAAPAPAEKT(ph)PV    | 2      | 775.871  | -2.00                   |
| 18       | IPI00217467 | HIST1H1E   | 1.00              | 1                             | T          | 1.62E-06  | 100.39    | _K_<br>_LQQGAGLESPPGQPEPGAAS(ph)P                       | 2      | 1013.498 | -1.98                   |
| 91       | IPI00012199 | CCDC86     | 1.00              | 1                             | S          | 0.0001166 | 57.80     | _QR_                                                    | 2      | 1192.056 | -1.94                   |
| 15       | IPI00026689 | CDC2       | 0.88              | 1                             | Y          | 0.168652  | 58.51     | _IGEGTY(ph)GVVYK_                                       | 2      | 633.294  | -1.91                   |

|      |             |          |      |   |   |           |        |                                            |   |          |       |
|------|-------------|----------|------|---|---|-----------|--------|--------------------------------------------|---|----------|-------|
| 15   | IPI00021766 | RTN4     | 0.84 | 1 | S | 0.0100798 | 48.71  | _(ac)M(ox)EDLDQSPLVSSSDS(ph)P<br>PRPQPAFK_ | 3 | 922.749  | -1.91 |
| 1328 | IPI00879004 | TOP2A    | 0.98 | 1 | S | 0.0103568 | 44.46  | _IKNENTEGS(ph)PQEDGVELEGLK_                | 3 | 789.363  | -1.91 |
| 103  | IPI00552073 | DHX16    | 0.99 | 1 | S | 1.25E-12  | 128.36 | _LLEDS(ph)EESSEETVSR_                      | 2 | 895.372  | -1.87 |
| 1412 | IPI00815713 | TCOF1    | 0.84 | 1 | S | 1.23E-05  | 106.79 | _LGAGEGGEAS(ph)VSPEK_                      | 2 | 734.322  | -1.85 |
| 210  | IPI00021812 | AHNAK    | 0.99 | 1 | S | 8.02E-109 | 251.61 | _LPS(ph)GSGAASPTGSAVDIR_                   | 2 | 861.907  | -1.84 |
| 25   | IPI00479997 | STMN1    | 1.00 | 1 | S | 0.0438497 | 68.22  | _ASGQAFELILS(ph)PR_                        | 2 | 734.863  | -1.82 |
| 192  | IPI00003377 | SFRS7    | 0.92 | 1 | S | 0.874565  | 60.67  | _YFQS(ph)PSR_                              | 2 | 482.700  | -1.74 |
| 547  | IPI00640092 | SH3PXD2A | 1.00 | 1 | S | 4.87E-17  | 136.85 | _EAEEGPTGASESQDS(ph)PR_                    | 2 | 913.857  | -1.72 |
| 216  | IPI00021812 | AHNAK    | 0.99 | 1 | S | 8.02E-109 | 251.61 | _LPSGSGAAS(ph)PTGSAVDIR_                   | 2 | 861.907  | -1.71 |
| 58   | IPI00012199 | CCDC86   | 1.00 | 1 | S | 3.69E-05  | 100.32 | _AGLGS(ph)PERPPK_                          | 2 | 594.792  | -1.70 |
| 5110 | IPI00021812 | AHNAK    | 1.00 | 1 | S | 0.001006  | 124.22 | _FKAEAPLPS(ph)PK_                          | 2 | 632.821  | -1.68 |
| 141  | IPI00183626 | PTBP1    | 0.83 | 1 | S | 0.344374  | 46.27  | _ELKTDSS(ph)PNQAR_                         | 2 | 713.322  | -1.67 |
| 11   | IPI00375015 | DUT      | 0.99 | 1 | S | 0.0458769 | 63.90  | _PCSEETPAIS(ph)PSKR_                       | 2 | 819.863  | -1.65 |
| 31   | IPI00021924 | H1FX     | 1.00 | 1 | S | 3.37E-06  | 136.96 | _AGGSAALS(ph)PSK_                          | 2 | 513.237  | -1.65 |
| 2    | IPI00872079 | TRA2B    | 1.00 | 1 | S | 4.21E-08  | 147.50 | _(ac)S(ph)DSGEQNYGER_                      | 2 | 682.244  | -1.63 |
| 32   | IPI00419791 | RSRC2    | 1.00 | 1 | S | 0.0349349 | 63.85  | _EQSEVSVS(ph)PR_                           | 2 | 599.261  | -1.61 |
| 102  | IPI00008527 | RPLP1    | 1.00 | 1 | S | 1.12E-77  | 221.70 | _KEES(ph)EESDDDM(ox)GFGFLD_                | 2 | 1023.364 | -1.61 |
| 304  | IPI00008530 | RPLP0    | 1.00 | 1 | S | 1.72E-66  | 194.68 | _VEAKEES(ph)EESDEDM(ox)GFGFLF<br>D_        | 2 | 1179.946 | -1.58 |
| 18   | IPI00217468 | HIST1H1B | 1.00 | 1 | S | 4.78E-10  | 119.22 | _(ac)SETAPAETATPAPVEKS(ph)PA<br>K_         | 2 | 1052.496 | -1.58 |
| 105  | IPI00008527 | RPLP1    | 1.00 | 1 | S | 1.12E-77  | 221.70 | _KEESEES(ph)DDDM(ox)GFGFLD_                | 2 | 1023.364 | -1.53 |
| 76   | IPI00219841 | LIG1     | 1.00 | 1 | S | 0.0171415 | 69.16  | _VLGSEGEEDDEALS(ph)PAK_                    | 2 | 920.398  | -1.53 |
| 37   | IPI00028451 | SOX15    | 1.00 | 1 | S | 0.0157884 | 82.06  | _EGAGS(ph)PAAPGTLPLEK_                     | 2 | 787.877  | -1.48 |
| 460  | IPI00654605 | MAP7D1   | 0.99 | 1 | S | 0.133651  | 54.65  | _LSASTASELS(ph)PK_                         | 2 | 635.800  | -1.47 |
| 390  | IPI00021405 | LMNA     | 0.98 | 1 | S | 6.01E-05  | 124.22 | _LS(ph)PSPTSQR_                            | 2 | 526.742  | -1.44 |
| 685  | IPI00104050 | THRAP3   | 0.97 | 1 | T | 0.005831  | 96.19  | _IDISPST(ph)FR_                            | 2 | 558.260  | -1.43 |
| 1084 | IPI00333541 | FLNA     | 0.87 | 1 | S | 0.0151103 | 64.59  | _AFGPGLQGGGAGS(ph)PAR_                     | 2 | 755.346  | -1.38 |
| 33   | IPI00021924 | H1FX     | 0.83 | 1 | S | 3.37E-06  | 136.96 | _AGGSAALSPS(ph)KK_                         | 2 | 577.284  | -1.36 |
| 113  | IPI00442843 | HMGA1    | 1.00 | 1 | S | 0.001267  | 78.28  | _EEEEGIS(ph)QESSEEEQ_                      | 2 | 909.825  | -1.36 |
| 405  | IPI00009771 | LMNB2    | 0.75 | 1 | S | 0.157971  | 63.85  | _LKLS(ph)PSPSSR_                           | 2 | 576.295  | -1.28 |
| 173  | IPI00217465 | HIST1H1C | 1.00 | 1 | S | 1         | 49.97  | _KVAKS(ph)PK_                              | 2 | 419.233  | -1.27 |
| 13   | IPI00922181 | MCM2     | 0.98 | 1 | S | 0.0609182 | 51.36  | _(ac)AESSESFMT(ox)ASS(ph)PAQR              | 2 | 912.361  | -1.27 |
| 509  | IPI00012079 | EIF4B    | 0.88 | 1 | S | 0.0085881 | 86.65  | _SQSSDTEQQS(ph)PTSGGGK_                    | 2 | 880.852  | -1.27 |
| 2454 | IPI00256861 | MACF1    | 1.00 | 1 | S | 0.133651  | 54.65  | _AFLAELEQNS(ph)PK_                         | 2 | 713.834  | -1.23 |
| 32   | IPI00450768 | KRT17    | 1.00 | 1 | S | 3.69E-05  | 100.32 | _LS(ph)GGLGAGSCR_                          | 2 | 557.739  | -1.23 |

|      |             |          |      |   |   |           |        |                                                   |   |          |       |
|------|-------------|----------|------|---|---|-----------|--------|---------------------------------------------------|---|----------|-------|
| 448  | IPI00647837 | ZNF185   | 1.00 | 1 | T | 7.25E-14  | 123.75 | _GGQGDPVPAQQPADPST(ph)PE<br>R_                    | 2 | 1077.976 | -1.21 |
| 794  | IPI00023649 | SBNO1    | 0.81 | 1 | S | 3.40E-18  | 141.14 | _S(ph)IDPDSIQSALLASGLGSK_                         | 2 | 969.975  | -1.21 |
| 2138 | IPI00900293 | FLNB     | 1.00 | 1 | S | 3.45E-09  | 121.73 | _APS(ph)VATVGSICDLNLK_                            | 2 | 862.918  | -1.20 |
| 27   | IPI00922181 | MCM2     | 0.98 | 1 | S | 0.0749993 | 63.59  | _GNDPLTSS(ph)PGR_                                 | 2 | 590.753  | -1.19 |
| 2825 | IPI00013933 | DSP      | 1.00 | 1 | S | 1.25E-12  | 128.36 | _GLPSYNM(ox)SSAPGS(ph)R_                          | 2 | 808.842  | -1.18 |
| 22   | IPI00013933 | DSP      | 1.00 | 1 | S | 0.0135935 | 128.52 | _AES(ph)GPDLR_                                    | 2 | 462.695  | -1.17 |
| 121  | IPI00015953 | DDX21    | 1.00 | 1 | S | 7.82E-19  | 139.73 | _NEEPS(ph)EEEIDAPKPK_                             | 3 | 597.928  | -1.17 |
| 2509 | IPI00900293 | FLNB     | 1.00 | 1 | S | 4.12E-08  | 109.65 | _LVS(ph)PGSANETSSILVESVTR_                        | 2 | 1063.523 | -1.16 |
| 187  | IPI00217467 | HIST1H1E | 1.00 | 1 | S | 0.0135935 | 128.52 | _KAPKS(ph)PAK_                                    | 2 | 453.744  | -1.16 |
| 188  | IPI00032597 | RBMX2    | 1.00 | 1 | S | 0.002226  | 87.56  | _EVQAEQPSSSS(ph)PR_                               | 2 | 741.317  | -1.15 |
| 120  | IPI00922181 | MCM2     | 1.00 | 1 | S | 0.0116635 | 73.12  | _GLLYDS(ph)DEEDEERPAR_                            | 2 | 987.410  | -1.14 |
| 216  | IPI00410590 | LSM14A   | 1.00 | 1 | S | 0.0103524 | 82.24  | _S(ph)PVSTRPLPSASQK_                              | 3 | 512.259  | -1.13 |
| 404  | IPI00020513 | ZYX      | 1.00 | 1 | S | 0.024293  | 74.04  | _S(ph)PGAGPLTLK_                                  | 2 | 559.286  | -1.13 |
| 1103 | IPI00216225 | ITGA6    | 1.00 | 1 | S | 0.0361751 | 72.84  | _AEIHAQPS(ph)DKER_                                | 3 | 487.556  | -1.11 |
| 464  | IPI00855856 | API5     | 0.90 | 1 | S | 0.002226  | 87.56  | _ASEDTTSGS(ph)PPK_                                | 2 | 628.756  | -1.11 |
| 677  | IPI00004273 | RBM25    | 0.94 | 1 | S | 0.36307   | 40.02  | _LGASNS(ph)PGQPNSVK_                              | 2 | 718.332  | -1.10 |
| 893  | IPI00856116 | PALLD    | 1.00 | 1 | S | 3.37E-06  | 136.96 | _IAS(ph)DEEIQGTK_                                 | 2 | 635.782  | -1.09 |
| 906  | IPI00815713 | TCOF1    | 1.00 | 1 | S | 3.85E-05  | 112.01 | _AALAPAKES(ph)PRK_                                | 2 | 659.848  | -1.09 |
| 246  | IPI00872944 | NUCKS1   | 1.00 | 1 | S | 0.327139  | 50.00  | _LKATVTPS(ph)PVK_                                 | 2 | 610.836  | -1.08 |
| 175  | IPI00031651 | C7orf50  | 1.00 | 1 | S | 0.084688  | 55.44  | _ELDEEGS(ph)DPPLPGR_                              | 2 | 795.838  | -1.07 |
| 169  | IPI00292771 | NUMA1    | 1.00 | 1 | S | 0.0018859 | 63.49  | _APVPSTCSSTFPEELS(ph)PPSHQAK<br>_                 | 3 | 845.380  | -1.04 |
| 90   | IPI00185919 | LARP1    | 1.00 | 1 | S | 4.11E-07  | 73.78  | _ESPRPLQLPGAEGPAIS(ph)DGEEG<br>GGEPGAGGAAGAAGAGR_ | 3 | 1203.219 | -1.03 |
| 690  | IPI00006207 | LRRFIP1  | 0.84 | 1 | S | 0.42736   | 42.96  | _IDGATQSS(ph)PAEPK_                               | 2 | 690.806  | -1.02 |
| 1414 | IPI00815713 | TCOF1    | 1.00 | 1 | S | 1.23E-05  | 106.79 | _LGAGEGGEASVS(ph)PEK_                             | 2 | 734.322  | -1.01 |
| 176  | IPI00031812 | YBX1     | 1.00 | 1 | S | 6.16E-28  | 163.63 | _NEGSES(ph)APEGQAQQR_                             | 2 | 834.336  | -1.01 |
| 1026 | IPI00472160 | ARHGEF2  | 1.00 | 1 | S | 0.268802  | 69.56  | _QELGS(ph)PEER_                                   | 2 | 562.735  | -0.98 |
| 138  | IPI00251559 | RNF20    | 1.00 | 1 | S | 4.74E-30  | 159.38 | _ALVVPEPEPDSDS(ph)NQER_                           | 2 | 981.428  | -0.98 |
| 456  | IPI00647837 | ZNF185   | 0.84 | 1 | S | 0.133651  | 54.65  | _QSSPS(ph)GSEQLVR_                                | 2 | 677.804  | -0.97 |
| 562  | IPI00464978 | IRS2     | 1.00 | 1 | S | 5.29E-05  | 93.54  | _RVS(ph)GDAAQDLDR_                                | 2 | 691.807  | -0.96 |
| 359  | IPI00641364 | PPAN     | 1.00 | 1 | S | 1.06E-05  | 102.36 | _VGGS(ph)DEEASGIPSR_                              | 2 | 720.804  | -0.95 |
| 491  | IPI00306087 | WDR79    | 0.96 | 1 | S | 5.32E-07  | 64.89  | _VFPEPTES(ph)GDEGEELGLPLLSTR<br>_                 | 2 | 1276.594 | -0.94 |
| 1386 | IPI00815713 | TCOF1    | 1.00 | 1 | S | 2.31E-06  | 147.50 | _KLS(ph)GDQPAAR_                                  | 2 | 561.769  | -0.93 |
| 280  | IPI00256861 | MACF1    | 1.00 | 1 | S | 0.266866  | 37.38  | _LLDAEDVDVPS(ph)PDEK_                             | 2 | 861.380  | -0.93 |
| 1298 | IPI00398002 | PLEC1    | 1.00 | 1 | S | 6.01E-05  | 124.22 | _AQLEPVAS(ph)PAK_                                 | 2 | 595.794  | -0.93 |
| 454  | IPI00647837 | ZNF185   | 0.85 | 1 | S | 0.133651  | 54.65  | _QSS(ph)PSGSEQLVR_                                | 2 | 677.804  | -0.92 |



|      |             |          |      |   |   |           |        |                              |   |          |       |
|------|-------------|----------|------|---|---|-----------|--------|------------------------------|---|----------|-------|
| 358  | IPI00008708 | RSL1D1   | 0.86 | 1 | T | 0.029099  | 61.01  | _AT(ph)NESEDEIPQLVPIGK_      | 2 | 960.454  | -0.92 |
| 389  | IPI00328293 | SRRM1    | 1.00 | 2 | S | 0.112709  | 66.77  | _RLS(ph)PSAS(ph)PPR_         | 2 | 614.268  | -0.91 |
| 93   | IPI00397883 | FLJ45252 | 1.00 | 1 | S | 0.0002124 | 100.53 | _LGGAVPFAPPEVSPH)PEQAK_      | 2 | 937.458  | -0.90 |
| 375  | IPI00220465 | LIMA1    | 0.98 | 1 | S | 3.85E-05  | 112.01 | _ASSLSESS(ph)PPK_            | 2 | 585.258  | -0.90 |
| 452  | IPI00746890 | ARHGEF5  | 0.94 | 1 | S | 0.001485  | 86.65  | _AEELSPAALSPS(ph)LEPIR_      | 2 | 930.461  | -0.89 |
| 363  | IPI00220465 | LIMA1    | 0.89 | 1 | S | 6.77E-05  | 105.65 | _PLS(ph)PDSR_                | 2 | 426.187  | -0.89 |
| 381  | IPI00815713 | TCOF1    | 1.00 | 1 | S | 0.0151103 | 64.59  | _AASAPAKES(ph)PR_            | 2 | 582.774  | -0.89 |
| 1219 | IPI00844237 | BAT2     | 1.00 | 1 | S | 0.327139  | 50.00  | _LIPGPLS(ph)PVAR_            | 2 | 600.331  | -0.88 |
| 499  | IPI00642971 | EEF1D    | 1.00 | 1 | S | 2.14E-08  | 108.77 | _ATAPQTQHVS(ph)PM(ox)R_      | 2 | 760.340  | -0.88 |
| 856  | IPI00031023 | FLII     | 1.00 | 1 | S | 0.0005188 | 92.08  | _NAEAVLQS(ph)PGLSGK_         | 2 | 725.851  | -0.87 |
| 96   | IPI00373869 | C17orf49 | 1.00 | 1 | S | 0.107374  | 45.33  | _VYEDSGIPLAES(ph)PK_         | 2 | 841.390  | -0.86 |
| 60   | IPI00384180 | YRDC     | 1.00 | 1 | S | 0.0103524 | 82.24  | _LPGSGAVQAAS(ph)PER_         | 2 | 710.335  | -0.85 |
| 138  | IPI00000733 | UTP18    | 0.99 | 1 | S | 0.218957  | 39.16  | _VQEHEDS(ph)GDSEVENEAK_      | 2 | 991.387  | -0.85 |
| 26   | IPI00005978 | SFRS2    | 0.98 | 1 | S | 0.107246  | 84.57  | _TS(ph)PDTLR_                | 2 | 435.192  | -0.85 |
| 31   | IPI00003394 | SMN1     | 1.00 | 2 | S | 3.70E-25  | 151.91 | _GTGQS(ph)DDS(ph)DIWDDTALIK_ | 2 | 1048.909 | -0.85 |
| 28   | IPI00003394 | SMN1     | 0.98 | 1 | S | 3.70E-25  | 151.91 | _GTGQS(ph)DDSDIWDDTALIK_     | 2 | 1008.925 | -0.85 |
| 1859 | IPI00301263 | CAD      | 1.00 | 1 | S | 0.0142303 | 72.24  | _IHRAS(ph)DPGLPAEEPKEK_      | 3 | 651.986  | -0.85 |
| 521  | IPI00028357 | XPO4     | 0.95 | 1 | S | 0.273627  | 37.38  | _HQQLLAS(ph)PGSSTVDNK_       | 3 | 630.630  | -0.84 |
| 750  | IPI00328293 | SRRM1    | 0.83 | 1 | S | 1         | 24.20  | _AAS(ph)PSPQSVR_             | 2 | 540.248  | -0.84 |
| 240  | IPI00023095 | MLF2     | 0.99 | 1 | S | 1.44E-08  | 115.98 | _LAIQGPEDSPS(ph)R_           | 2 | 675.308  | -0.84 |
| 74   | IPI00306280 | DENR     | 0.84 | 1 | S | 6.39E-07  | 69.25  | _LTVENS(ph)PKQEAGISEGQGTAG_  | 3 | 933.085  | -0.84 |
| 305  | IPI00013949 | SGTA     | 0.99 | 1 | S | 2.14E-08  | 108.77 | _EEEEK_                      | 2 | 757.791  | -0.83 |
| 496  | IPI00006079 | BCLAF1   | 0.94 | 1 | S | 0.157971  | 63.85  | _SRTSPS(ph)ASNDQQE_          | 2 | 627.292  | -0.82 |
| 148  | IPI00030968 | C9orf142 | 1.00 | 1 | S | 0.0351731 | 73.06  | _KETQS(ph)PEQVK_             | 2 | 627.292  | -0.82 |
| 2    | IPI00021728 | EIF2S2   | 0.83 | 1 | S | 1         | 19.00  | _RLAAAEETAVS(ph)PR_          | 2 | 725.856  | -0.81 |
| 429  | IPI00011857 | CHAF1B   | 0.86 | 1 | S | 0.0460827 | 54.27  | _K_                          | 2 | 806.301  | -0.81 |
| 2658 | IPI00436632 | NIPBL    | 1.00 | 1 | S | 1.85E-08  | 104.52 | _TQDPSS(ph)PGTTPPQAR_        | 2 | 810.357  | -0.80 |
| 2152 | IPI00333541 | FLNA     | 1.00 | 1 | S | 0.0012045 | 97.44  | _AITSLGGGS(ph)PK_            | 2 | 590.802  | -0.80 |
| 201  | IPI00215884 | SFRS1    | 0.75 | 1 | S | 1         | 35.34  | _RAPS(ph)VANVGSHCDLSLK_      | 3 | 630.968  | -0.80 |
| 11   | IPI00290461 | EIF3J    | 0.87 | 1 | S | 4.17E-16  | 92.64  | _SPS(ph)YGR_                 | 2 | 373.647  | -0.79 |
| 617  | IPI00216219 | TJP1     | 1.00 | 1 | S | 0.0783861 | 54.65  | _S(ph)AAAAAAGDS(ph)DSWDADA_  | 2 | 905.724  | -0.77 |
| 669  | IPI00013290 | HDGFRP2  | 1.00 | 1 | S | 5.29E-05  | 93.54  | _FSVEDPVRK_                  | 3 | 905.724  | -0.77 |
| 220  | IPI00011253 | RPS3     | 0.77 | 1 | T | 0.42736   | 42.96  | _S(ph)REDLSAQPVQTK_          | 2 | 769.864  | -0.77 |
| 164  | IPI00000685 | CDK7     | 1.00 | 1 | S | 0.874565  | 60.67  | _ARGDS(ph)EALDEES_           | 2 | 679.759  | -0.74 |
| 2    | IPI00827535 | PTMA     | 1.00 | 1 | S | 0.0221542 | 77.65  | _DEILPT(ph)TPISEQK_          | 2 | 775.871  | -0.74 |
| 14   | IPI00872079 | TRA2B    | 1.00 | 1 | S | 0.0458769 | 63.90  | _SFGS(ph)PNR_                | 2 | 422.671  | -0.72 |
| 288  | IPI00005667 | N4BP1    | 1.00 | 1 | S | 0.180416  | 114.35 | _S(ph)DAAVDTSEITTK_          | 2 | 773.830  | -0.68 |
|      |             |          |      |   |   |           |        | _S(ph)SDSGEQNYGERES(ph)R_    | 2 | 868.331  | -0.68 |
|      |             |          |      |   |   |           |        | _RFS(ph)DSEER_               | 2 | 553.219  | -0.68 |

|      |             |               |      |   |   |           |        |                                                       |   |          |       |
|------|-------------|---------------|------|---|---|-----------|--------|-------------------------------------------------------|---|----------|-------|
| 3    | IPI00156032 | KRR1          | 0.99 | 1 | S | 0.0038145 | 108.14 | _(ac)AS(ph)PSLERPEK_                                  | 2 | 618.287  | -0.67 |
| 101  | IPI00219301 | MARCKS        | 1.00 | 1 | S | 6.28E-09  | 120.16 | _GEPAAAAPEAGAS(ph)PVEK_<br>_GLAEVQQDGEAEEGATS(ph)DGEK | 2 | 851.888  | -0.66 |
| 598  | IPI00237884 | AKAP12        | 1.00 | 1 | S | 7.25E-14  | 123.75 |                                                       | 2 | 1100.450 | -0.66 |
| 1238 | IPI00925413 | EIF4G1        | 1.00 | 1 | S | 0.74912   | 41.67  | _EAALPPVS(ph)PLK_                                     | 2 | 601.315  | -0.66 |
| 85   | IPI00922610 | PXN           | 0.79 | 1 | S | 0.0635824 | 48.85  | _FIHQPPQSSS(ph)PVYGSSAK_                              | 3 | 676.646  | -0.66 |
| 936  | IPI00413961 | DKFZp666O0110 | 0.99 | 1 | T | 2.73E-14  | 132.59 | _LQPQEISPPPT(ph)ANLDR_                                | 2 | 928.451  | -0.66 |
| 48   | IPI00453473 | HIST1H4A      | 1.00 | 1 | S | 0.0002635 | 89.16  | _RIS(ph)GLIYEETR_                                     | 2 | 708.848  | -0.65 |
| 243  | IPI00104050 | THRAP3        | 1.00 | 1 | S | 0.0038145 | 108.14 | _ASAVSELS(ph)PR_                                      | 2 | 548.755  | -0.65 |
| 993  | IPI00329547 | ZC3H13        | 1.00 | 1 | S | 0.0151103 | 64.59  | _GNIETTSEDGQVFS(ph)PK_                                | 2 | 894.888  | -0.64 |
| 225  | IPI00420014 | SNRNP200      | 1.00 | 1 | S | 2.73E-14  | 132.59 | _EEAS(ph)DDDMEGDEAVVR_                                | 2 | 923.838  | -0.63 |
| 515  | IPI00470779 | TXLNA         | 0.90 | 1 | S | 0.0103524 | 82.24  | _RPEPGAQAPSS(ph)PR_                                   | 2 | 743.844  | -0.63 |
| 708  | IPI00216654 | NOLC1         | 1.00 | 1 | S | 0.0235131 | 60.50  | _GGSISVQVNSIKFDS(ph)E_                                | 2 | 873.901  | -0.63 |
| 307  | IPI00394926 | POLD3         | 1.00 | 1 | S | 0.0259492 | 60.02  | _VALS(ph)DDETKETENM(ox)R_                             | 2 | 917.382  | -0.63 |
| 445  | IPI00746890 | ARHGEF5       | 1.00 | 2 | S | 0.001485  | 86.65  | _AEELS(ph)PAALS(ph)PSLEPIR_                           | 2 | 970.444  | -0.63 |
| 450  | IPI00746890 | ARHGEF5       | 0.99 | 2 | S | 0.001485  | 86.65  | _AEELS(ph)PAALS(ph)PSLEPIR_                           | 2 | 970.444  | -0.63 |
| 1757 | IPI00292771 | NUMA1         | 0.86 | 1 | S | 0.0032472 | 70.05  | _TQPDGTSVPGEPAS(ph)PISQR_                             | 2 | 1002.457 | -0.63 |
| 899  | IPI00021267 | EPHA2         | 0.86 | 1 | S | 0.0438497 | 68.22  | _LPSTS(ph)GSEGVVPR_                                   | 2 | 707.324  | -0.60 |
| 491  | IPI00220465 | LIMA1         | 1.00 | 1 | S | 0.0160793 | 77.46  | _ETPHS(ph)PGVEDAPIAK_                                 | 3 | 543.250  | -0.60 |
| 177  | IPI00006079 | BCLAF1        | 1.00 | 1 | S | 2.60E-12  | 131.77 | _KAEGEPQEEES(ph)PLK_                                  | 2 | 761.345  | -0.60 |
| 517  | IPI00001738 | NUP88         | 1.00 | 1 | S | 0.0056232 | 78.54  | _EDVEVAES(ph)PLR_                                     | 2 | 662.295  | -0.60 |
| 5731 | IPI00021812 | AHNAK         | 1.00 | 1 | S | 2.61E-09  | 117.38 | _GGVTGS(ph)PEASISGSK_                                 | 2 | 707.317  | -0.59 |
| 280  | IPI00856045 | AHNAK2        | 0.89 | 1 | S | 0.0002635 | 89.16  | _SHS(ph)SSEAYEPR_                                     | 2 | 665.259  | -0.59 |
| 393  | IPI00328293 | SRRM1         | 1.00 | 2 | S | 0.112709  | 66.77  | _RLS(ph)PSAS(ph)PPR_                                  | 3 | 409.848  | -0.59 |
| 688  | IPI00033907 | ANAPC1        | 1.00 | 1 | S | 1.23E-05  | 106.79 | _NFDGEGSLs(ph)PVIAPK_                                 | 2 | 850.900  | -0.59 |
| 304  | IPI00395337 | FIP1L1        | 1.00 | 1 | S | 0.429209  | 72.21  | _AES(ph)PDLR_                                         | 2 | 434.184  | -0.58 |
| 589  | IPI00020984 | CANX          | 0.85 | 1 | S | 0.0171415 | 69.16  | _QKS(ph)DAEEDGGTVSQEEEDR_                             | 2 | 1094.929 | -0.58 |
| 382  | IPI00298788 | ILF3          | 0.98 | 1 | S | 0.181918  | 48.10  | _RPM(ox)EEDGEEKS(ph)PSK_                              | 2 | 857.853  | -0.57 |
| 450  | IPI00006932 | LUC7L2        | 1.00 | 1 | S | 0.164547  | 58.94  | _RSS(ph)EEREAGEI_                                     | 2 | 671.785  | -0.56 |
| 36   | IPI00009867 | KRT5          | 1.00 | 1 | S | 0.257113  | 88.27  | _TSFTSVS(ph)R_<br>_KPS(ph)PAQAETPALELPLPSVPA          | 2 | 482.710  | -0.56 |
| 557  | IPI00103483 | COBRA1        | 0.99 | 1 | S | 0.173967  | 38.37  | PAPL_                                                 | 2 | 1321.696 | -0.56 |
| 1468 | IPI00069817 | BAZ1B         | 1.00 | 1 | S | 0.0085881 | 86.65  | _LAEDEGDS(ph)EPEAVGQSR_                               | 2 | 934.881  | -0.56 |
| 361  | IPI00008708 | RSL1D1        | 0.84 | 1 | S | 0.029099  | 61.01  | _ATNES(ph)EDEIPLVPIGK_<br>_AADS(ph)DDGAVSAPAASDGGVS   | 2 | 960.454  | -0.56 |
| 5    | IPI00549516 | TOE1          | 1.00 | 1 | S | 1.76E-06  | 87.39  | K_                                                    | 2 | 964.399  | -0.56 |

|      |             |          |      |   |   |           |        |                                                             |   |          |       |
|------|-------------|----------|------|---|---|-----------|--------|-------------------------------------------------------------|---|----------|-------|
| 691  | IPI00855787 | TNKS1BP1 | 1.00 | 1 | S | 4.74E-30  | 159.38 | _WLDDLLAS(ph)PPPSGGGAR_                                     | 2 | 894.919  | -0.56 |
| 214  | IPI00299254 | EIF5B    | 1.00 | 1 | S | 6.41E-08  | 114.70 | _NKPGPNIES(ph)GNEDDDASFK_                                   | 2 | 1057.439 | -0.55 |
| 173  | IPI00646493 | COPA     | 1.00 | 1 | S | 0.0749993 | 63.59  | _NLS(ph)PGAVESDVR_                                          | 2 | 662.301  | -0.55 |
| 289  | IPI00792743 | SLTM     | 0.97 | 1 | S | 0.0559824 | 51.98  | _DGQDAIAQS(ph)PEK_                                          | 2 | 669.782  | -0.54 |
| 513  | IPI00873935 | DKC1     | 1.00 | 1 | S | 0.0789022 | 92.16  | _AKEVELVS(ph)E_                                             | 2 | 542.252  | -0.54 |
| 136  | IPI00398749 | PUM2     | 1.00 | 1 | S | 0.0039116 | 83.05  | _GKAS(ph)PFEEDQNR_                                          | 2 | 729.306  | -0.54 |
| 1459 | IPI00333541 | FLNA     | 1.00 | 1 | S | 1.85E-08  | 104.52 | _CSGPGLS(ph)PGM(ox)VR_                                      | 2 | 657.273  | -0.54 |
| 395  | IPI00021405 | LMNA     | 1.00 | 2 | S | 6.01E-05  | 124.22 | _LRLS(ph)PSPTS(ph)QR_                                       | 2 | 701.318  | -0.53 |
| 1080 | IPI00101186 | RRP12    | 1.00 | 1 | S | 0.0003493 | 53.55  | _GDSIEEILADS(ph)EDEEDNEEEER_<br>_FEEESKEPVADEEEEDS(ph)DDDVE | 2 | 1316.501 | -0.53 |
| 102  | IPI00004795 | CLNS1A   | 1.00 | 1 | S | 1.43E-26  | 110.10 | PITEFR_                                                     | 3 | 1132.123 | -0.53 |
| 1579 | IPI00036742 | KIAA1429 | 0.89 | 1 | S | 0.164547  | 58.94  | _SFLSEPS(ph)PGR_                                            | 2 | 622.271  | -0.52 |
| 93   | IPI00297579 | CBX3     | 0.87 | 1 | S | 8.14E-40  | 225.17 | _S(ph)LSDESDDSK_                                            | 2 | 625.227  | -0.52 |
| 299  | IPI00477313 | HNRNPC   | 0.95 | 1 | S | 0.0548721 | 50.34  | _EAEEGEDDRDS(ph)ANGEDDS_                                    | 2 | 1010.332 | -0.51 |
| 914  | IPI00784320 | FAM83H   | 1.00 | 1 | S | 0.0056232 | 78.54  | _RGS(ph)PVPPVPER_                                           | 2 | 635.819  | -0.51 |
| 64   | IPI00009867 | KRT5     | 1.00 | 1 | S | 0.0232054 | 128.52 | _S(ph)LYNLGGSK_                                             | 2 | 509.734  | -0.51 |
| 202  | IPI00218694 | CALD1    | 1.00 | 1 | S | 1.85E-08  | 104.52 | _RGS(ph)JGENQGEEK_                                          | 2 | 692.299  | -0.50 |
| 785  | IPI00784320 | FAM83H   | 0.98 | 1 | S | 0.0259373 | 80.54  | _S(ph)LESCLDLR_                                             | 2 | 643.297  | -0.50 |
| 112  | IPI00018798 | DNAJC17  | 0.99 | 1 | S | 0.0103524 | 82.24  | _QAAQES(ph)EEEEESR_                                         | 2 | 865.331  | -0.50 |
| 185  | IPI00028481 | RAB8A    | 1.00 | 1 | S | 0.0192298 | 68.52  | _KLEGNSPQGS(ph)NOGVK_                                       | 2 | 811.880  | -0.49 |
| 37   | IPI00384180 | YRDC     | 1.00 | 1 | S | 0.0311671 | 57.73  | _LFRPPS(ph)PAPAAPGAR_                                       | 3 | 528.940  | -0.48 |
| 18   | IPI00012199 | CCDC86   | 1.00 | 1 | S | 9.37E-15  | 135.45 | _LGLRPES(ph)PESLTSVSR_                                      | 3 | 622.310  | -0.48 |
| 556  | IPI00908725 | ZC3H18   | 0.99 | 2 | S | 0.0789022 | 92.16  | _LGVVS(ph)VS(ph)PSR_                                        | 2 | 531.225  | -0.48 |
| 208  | IPI00304692 | RBMX     | 1.00 | 1 | S | 0.429209  | 72.21  | _DVYLS(ph)PR_                                               | 2 | 465.210  | -0.48 |
| 161  | IPI00003843 | TJP2     | 1.00 | 1 | S | 1.31E-46  | 180.02 | _VQVAALQAS(ph)PPLDQDDR_                                     | 2 | 951.951  | -0.48 |
| 575  | IPI00290142 | CTPS     | 0.80 | 1 | S | 0.0005188 | 92.08  | _SGSSS(ph)PDSEITELK_                                        | 2 | 758.824  | -0.48 |
| 292  | IPI00102752 | RBM15    | 0.75 | 1 | S | 0.0554954 | 68.46  | _S(ph)LSPGGAALGYR_                                          | 2 | 614.790  | -0.47 |
| 363  | IPI00071318 | LUC7L    | 1.00 | 1 | S | 0.733563  | 45.33  | _RS(ph)EEKEAGEI_                                            | 2 | 614.266  | -0.46 |
| 446  | IPI00003843 | TJP2     | 1.00 | 1 | S | 0.107246  | 84.57  | _SFS(ph)PEER_                                               | 2 | 466.181  | -0.46 |
| 340  | IPI00915260 | CCNK     | 1.00 | 1 | S | 0.164547  | 58.94  | _AVVVS(ph)PKEENK_                                           | 2 | 640.318  | -0.46 |
| 537  | IPI00010400 | PLCB3    | 1.00 | 1 | S | 1         | 44.87  | _S(ph)LGDEGLNR_                                             | 2 | 520.724  | -0.45 |
| 782  | IPI00152510 | DDX54    | 1.00 | 1 | S | 0.0103524 | 82.24  | _IDDRDS(ph)DEEGASDR_                                        | 2 | 830.310  | -0.45 |
| 83   | IPI00028888 | HNRNPD   | 0.97 | 1 | S | 9.77E-18  | 141.14 | _NEEDEGHSNSS(ph)PR_                                         | 2 | 769.281  | -0.45 |
| 95   | IPI00297579 | CBX3     | 1.00 | 1 | S | 8.14E-40  | 225.17 | _KSLS(ph)DSESDDSK_                                          | 2 | 689.275  | -0.45 |
| 19   | IPI00910738 | KRT6B    | 1.00 | 1 | S | 4.60E-05  | 145.18 | _RGFS(ph)ASSAR_                                             | 2 | 509.727  | -0.43 |
| 136  | IPI00163505 | RBM39    | 1.00 | 1 | S | 0.273627  | 37.38  | _DKS(ph)PVREPIDNLTPEER_                                     | 3 | 692.332  | -0.42 |
| 682  | IPI00104050 | THRAP3   | 1.00 | 1 | S | 0.005831  | 96.19  | _IDIS(ph)PSTFR_                                             | 2 | 558.260  | -0.41 |
| 347  | IPI00022536 | RPS6KA4  | 0.86 | 1 | S | 0.834823  | 27.00  | _LEPVYSPPGS(ph)PPPGDPR_                                     | 2 | 921.427  | -0.41 |
| 233  | IPI00477313 | HNRNPC   | 0.97 | 1 | S | 0.755839  | 26.81  | _NDKS(ph)EEEQSSSVK_                                         | 2 | 817.333  | -0.40 |

|      |             |               |      |   |   |           |        |                                                                 |   |          |       |
|------|-------------|---------------|------|---|---|-----------|--------|-----------------------------------------------------------------|---|----------|-------|
| 494  | IPI00873935 | DKC1          | 1.00 | 1 | S | 6.93E-46  | 175.05 | _AGLESGAEPGDGDS(ph)DTTK_<br>_GIPLATGDTS(ph)PEPELLPGAPLPP<br>PK_ | 2 | 893.854  | -0.40 |
| 42   | IPI00290460 | EIF3G         | 0.99 | 1 | S | 0.0017647 | 54.32  |                                                                 | 2 | 1272.654 | -0.40 |
| 57   | IPI00220739 | PGRMC1        | 0.99 | 1 | S | 1.64E-10  | 119.22 | _GDQPAASGDS(ph)DDDEPPPLPR_                                      | 2 | 1058.429 | -0.39 |
| 190  | IPI00152011 | ARHGAP29      | 1.00 | 1 | S | 0.0369466 | 72.84  | _GNFS(ph)PLELDNVLLK_<br>_DNLGEVPLTPT(ph)EEASLPLAVTK             | 2 | 819.911  | -0.39 |
| 1869 | IPI00894235 | NBEAL2        | 0.82 | 1 | T | 9.07E-07  | 67.90  |                                                                 | 2 | 1187.593 | -0.39 |
| 153  | IPI00290314 | WRNIP1        | 1.00 | 1 | S | 1.06E-05  | 102.36 | _RPAAAAAAGSAS(ph)PR_<br>_(ac)AASAAAAAASASASGS(ph)               | 2 | 667.322  | -0.38 |
| 19   | IPI00438229 | TRIM28        | 0.76 | 1 | S | 0.0031006 | 52.36  | PGPGEGSAGGEK_                                                   | 3 | 837.033  | -0.37 |
| 344  | IPI00010586 | TMF1          | 1.00 | 1 | S | 1.06E-05  | 102.36 | _SVSEINS(ph)DDELSGK_<br>_(ac)GDS(ph)DDEYDR_                     | 2 | 780.327  | -0.37 |
| 4    | IPI00375144 | SRRT          | 1.00 | 1 | S | 0.399492  | 54.27  |                                                                 | 2 | 597.185  | -0.36 |
| 120  | IPI00055954 | WDR43         | 1.00 | 1 | S | 0.161226  | 80.54  | _LQAKES(ph)PQRK_<br>_LQEEGGGS(ph)DEEETGSPSEDGM                  | 2 | 632.824  | -0.36 |
| 50   | IPI00014298 | PWP1          | 1.00 | 1 | S | 1.72E-09  | 77.06  | (ox)QSAR_                                                       | 3 | 893.340  | -0.35 |
| 164  | IPI00299254 | EIF5B         | 1.00 | 1 | S | 8.19E-10  | 140.37 | _WDGS(ph)EEDEDNSK_<br>_KLTS(ph)DEEGEPSGK_                       | 2 | 745.751  | -0.35 |
| 630  | IPI00103090 | LEO1          | 0.88 | 1 | S | 1         | 28.92  |                                                                 | 2 | 728.814  | -0.35 |
| 307  | IPI00008530 | RPLP0         | 1.00 | 1 | S | 1.72E-66  | 194.68 | _EESEES(ph)DEDM(ox)GFGLFD_<br>_VNDAEPGS(ph)PEAPQGK_             | 2 | 966.324  | -0.35 |
| 83   | IPI00217541 | DDX51         | 1.00 | 1 | S | 3.45E-09  | 121.73 |                                                                 | 2 | 788.338  | -0.34 |
| 297  | IPI00003843 | TJP2          | 1.00 | 1 | S | 0.107246  | 84.57  | _AYS(ph)PEYR_                                                   | 2 | 483.192  | -0.34 |
| 51   | IPI00885104 | MPHOSPH8      | 1.00 | 1 | S | 1.64E-10  | 119.22 | _GAEAFGDS(ph)EEDGEDVFEVEK_<br>_GVAPADS(ph)PEAPR_                | 2 | 1119.934 | -0.34 |
| 737  | IPI00292914 | ANKIB1        | 1.00 | 1 | S | 0.53015   | 31.29  |                                                                 | 2 | 623.777  | -0.33 |
| 432  | IPI00170778 | FNBP4         | 1.00 | 1 | S | 2.61E-09  | 117.38 | _ALEEGDGSVSGSS(ph)PR_                                           | 2 | 764.320  | -0.32 |
| 693  | IPI00018274 | EGFR          | 0.91 | 1 | T | 4.39E-15  | 134.89 | _ELVEPLT(ph)PSGEAPNQALLR_<br>_(ac)AAAVAAAGAGEPQS(ph)PDEL        | 2 | 1057.530 | -0.32 |
| 15   | IPI00024976 | TOMM22        | 1.00 | 1 | S | 3.16E-19  | 154.14 | LPK_                                                            | 2 | 1042.999 | -0.31 |
| 273  | IPI00478229 | RP11-320F15.1 | 1.00 | 1 | S | 0.0487691 | 53.75  | _KPRPS(ph)EGDEDCLPASK_<br>_PLLS(ph)PEER_                        | 3 | 622.608  | -0.31 |
| 913  | IPI00152011 | ARHGAP29      | 1.00 | 1 | S | 1         | 44.87  |                                                                 | 2 | 510.742  | -0.31 |
| 87   | IPI00384857 | HN1           | 1.00 | 1 | S | 1.26E-33  | 176.16 | _NS(ph)SEASSGDFLDLK_<br>_GFSASS(ph)AR_                          | 2 | 775.325  | -0.31 |
| 22   | IPI00910738 | KRT6B         | 0.77 | 1 | S | 4.60E-05  | 145.18 |                                                                 | 2 | 431.676  | -0.30 |
| 619  | IPI00328293 | SRRM1         | 1.00 | 2 | S | 0.236704  | 72.09  | _RYS(ph)PS(ph)PPPK_<br>_RYS(ph)PS(ph)PPPK_                      | 2 | 594.746  | -0.30 |
| 617  | IPI00328293 | SRRM1         | 1.00 | 2 | S | 0.236704  | 72.09  |                                                                 | 2 | 594.746  | -0.30 |
| 156  | IPI00900260 | ARHGEF7       | 1.00 | 1 | S | 0.884375  | 49.59  | _ASEKPVS(ph)PK_<br>_APQTSSS(ph)PPPVR_                           | 2 | 511.750  | -0.30 |
| 708  | IPI00328293 | SRRM1         | 0.99 | 1 | S | 0.0351731 | 73.06  |                                                                 | 2 | 652.306  | -0.30 |
| 558  | IPI00908725 | ZC3H18        | 0.99 | 1 | S | 0.0789022 | 92.16  | _LGVSVS(ph)PSR_<br>_ATS(ph)FEESER_                              | 2 | 491.242  | -0.29 |
| 949  | IPI00152011 | ARHGAP29      | 0.99 | 1 | S | 0.268802  | 69.56  |                                                                 | 2 | 568.219  | -0.28 |
| 695  | IPI00871240 | DKFzp434J2412 | 0.77 | 1 | S | 0.680302  | 25.33  | _SSEPVKETVQTTQS(ph)PTPVEK_                                      | 3 | 751.361  | -0.27 |

|      |             |          |      |   |   |           |        |                             |   |          |       |
|------|-------------|----------|------|---|---|-----------|--------|-----------------------------|---|----------|-------|
| 510  | IPI00414289 | GPS1     | 1.00 | 1 | S | 0.0160793 | 77.46  | _EGS(ph)QGELTPANSQSR_       | 2 | 820.849  | -0.27 |
| 42   | IPI00001757 | RBM8A    | 1.00 | 1 | S | 0.0789022 | 92.16  | _GFGS(ph)EEGSR_             | 2 | 503.187  | -0.27 |
| 783  | IPI00375731 | RBM10    | 0.99 | 1 | S | 0.74912   | 41.67  | _LAS(ph)DDRPSPPR_           | 2 | 645.796  | -0.27 |
| 9    | IPI00288941 | NCOA5    | 1.00 | 1 | S | 0.0749993 | 63.59  | _(ac)M(ox)NTAPSRPS(ph)PTR_  | 2 | 726.819  | -0.26 |
| 383  | IPI00816415 | AKAP2    | 0.85 | 1 | S | 3.53E-05  | 85.72  | _DALGDSLQVPVS(ph)PSSTTSSR_  | 2 | 1042.481 | -0.26 |
| 765  | IPI00218993 | HSPH1    | 1.00 | 1 | S | 0.282389  | 76.32  | _IES(ph)PKLER_              | 2 | 526.263  | -0.26 |
| 925  | IPI00477468 | CTR9     | 1.00 | 1 | T | 9.21E-06  | 91.45  | _GGEFDEFVNDT(ph)DDDLPISK_   | 2 | 1154.463 | -0.25 |
| 870  | IPI00784320 | FAM83H   | 0.99 | 1 | S | 0.005831  | 96.19  | _GS(ph)PTSAYPER_            | 2 | 572.737  | -0.25 |
| 1161 | IPI00853400 | FKBP15   | 0.83 | 2 | S | 0.0656179 | 59.28  | _S(ph)S(ph)LSGDEEDELFK_     | 2 | 808.294  | -0.24 |
| 34   | IPI00290077 | KRT15    | 1.00 | 1 | S | 4.18E-69  | 195.31 | _GGSLLAGGGGFGGGS(ph)LSGGG   | 2 | 951.429  | -0.24 |
| 272  | IPI00337530 | REPS1    | 0.87 | 1 | S | 0.164547  | 58.94  | GSR_                        | 2 | 724.796  | -0.24 |
| 107  | IPI00479191 | HNRNP1   | 0.91 | 1 | T | 1.74E-06  | 111.24 | _RQS(ph)SSYDDPWK_           | 2 | 882.871  | -0.23 |
| 499  | IPI00100151 | XRN2     | 1.00 | 1 | S | 1.97E-30  | 156.89 | _HTGPNPDT(ph)ANDGFVR_       | 2 | 948.878  | -0.22 |
| 501  | IPI00100151 | XRN2     | 1.00 | 2 | S | 1.97E-30  | 156.89 | _KAEDS(ph)DSEPEPEDNVR_      | 2 | 1066.912 | -0.22 |
| 562  | IPI00419847 | SORBS3   | 0.88 | 1 | T | 0.0160793 | 77.46  | _RKAEDS(ph)DS(ph)EPEPEDNVR_ | 2 | 789.843  | -0.22 |
| 1530 | IPI00027422 | ITGB4    | 0.85 | 1 | T | 0.74912   | 41.67  | _SPADPTDLGGQT(ph)SPR_       | 2 | 604.290  | -0.22 |
| 516  | IPI00007675 | DYNC1L1  | 0.98 | 1 | S | 6.41E-08  | 114.70 | _LTAGVPDT(ph)PTR_           | 2 | 983.456  | -0.21 |
| 113  | IPI00221093 | RPS17    | 0.77 | 1 | S | 0.0256707 | 38.76  | _KPVTVSPTTPTS(ph)PTEGEAS_   | 2 | 835.741  | -0.21 |
| 260  | IPI00328293 | SRRM1    | 1.00 | 1 | S | 0.0142303 | 72.24  | _LLDFGS(ph)LSNLQVTQPTVGM(ox | 3 | 989.500  | -0.21 |
| 199  | IPI00550181 | CHMP2B   | 1.00 | 1 | S | 2.31E-06  | 147.50 | )NFK_                       | 2 | 621.766  | -0.21 |
| 114  | IPI00008998 | PTPLAD1  | 1.00 | 1 | S | 1.15E-12  | 153.28 | _VPKPEPIPEPKEPS(ph)PEK_     | 2 | 795.313  | -0.21 |
| 1907 | IPI00179298 | HUWE1    | 1.00 | 1 | S | 5.27E-34  | 186.01 | _ATIS(ph)DEEIER_            | 2 | 789.309  | -0.21 |
| 23   | IPI00217975 | LMNB1    | 0.83 | 1 | S | 0.344374  | 46.27  | _WLDES(ph)DAEM(ox)ELR_      | 2 | 617.795  | -0.20 |
| 30   | IPI00419791 | RSRC2    | 0.88 | 1 | S | 0.0349349 | 63.85  | _GSGTAS(ph)DDEFENLR_        | 2 | 599.261  | -0.20 |
| 117  | IPI00789101 | PTGES3   | 1.00 | 1 | S | 7.29E-61  | 216.10 | _AGGPTTPLS(ph)PTR_          | 2 | 986.315  | -0.19 |
| 39   | IPI00450768 | KRT17    | 1.00 | 1 | S | 3.69E-05  | 100.32 | _EQSEVS(ph)VSPR_            | 2 | 557.739  | -0.19 |
| 65   | IPI00001654 | PCM1     | 0.99 | 1 | S | 0.0071128 | 86.82  | _DWEDDS(ph)DEDM(ox)SNFDR_   | 2 | 797.859  | -0.19 |
| 290  | IPI00307162 | VCL      | 0.86 | 1 | S | 0.0259492 | 60.02  | _LSGGLGAGS(ph)CR_           | 2 | 775.828  | -0.18 |
| 633  | IPI00007334 | ACIN1    | 1.00 | 1 | S | 0.268802  | 69.56  | _VTNDIS(ph)PESSPGVGR_       | 2 | 546.266  | -0.18 |
| 19   | IPI00025156 | STUB1    | 0.93 | 1 | S | 0.114124  | 43.38  | _DPSAS(ph)PGDAGEQAIR_       | 2 | 476.710  | -0.18 |
| 2525 | IPI00887108 | KIAA1731 | 0.85 | 1 | S | 0.12577   | 50.00  | _LQPERGS(ph)PK_             | 2 | 628.798  | -0.18 |
| 392  | IPI00021405 | LMNA     | 1.00 | 1 | S | 6.01E-05  | 124.22 | _LGAGGGS(ph)PEK_            | 2 | 526.742  | -0.18 |
| 244  | IPI00000634 | CCDC6    | 1.00 | 1 | S | 0.0039116 | 83.05  | _EKPSISS(ph)SVSR_           | 2 | 672.321  | -0.18 |
| 60   | IPI00007955 | TRIM16   | 0.86 | 1 | S | 0.00031   | 74.57  | _LSPS(ph)PTSQR_             | 2 | 1079.900 | -0.17 |
|      |             |          |      |   |   |           |        | _LDQVPVAPPS(ph)PR_          | 2 |          |       |
|      |             |          |      |   |   |           |        | _ETEEQDS(ph)DSAEQGDPAGEGK_  | 2 |          |       |

|      |             |          |      |   |   |           |        |                             |   |          |       |
|------|-------------|----------|------|---|---|-----------|--------|-----------------------------|---|----------|-------|
| 6    | IPI00215965 | HNRNPA1  | 0.96 | 1 | S | 0.0048869 | 79.38  | _SES(ph)PKEPEQLR_           | 3 | 460.545  | -0.17 |
| 82   | IPI00009867 | KRT5     | 1.00 | 1 | S | 3.37E-06  | 136.96 | _ISISTSGGS(ph)FR_           | 2 | 596.274  | -0.17 |
| 226  | IPI00290204 | SNRNP70  | 1.00 | 1 | S | 0.044537  | 67.17  | _YDERPGPS(ph)PLPHR_         | 3 | 534.247  | -0.17 |
| 60   | IPI00910738 | KRT6B    | 1.00 | 1 | S | 1.27E-05  | 159.29 | _S(ph)LYLGGGSK_             | 2 | 481.223  | -0.16 |
| 6    | IPI00013895 | S100A11  | 0.99 | 1 | S | 0.161226  | 80.54  | _ISS(ph)PTETER_             | 2 | 550.237  | -0.15 |
| 461  | IPI00328293 | SRRM1    | 0.96 | 1 | S | 0.0369466 | 72.84  | _KVELS(ph)ESEEDKGGK_        | 3 | 538.913  | -0.15 |
| 350  | IPI00306406 | RIOK2    | 1.00 | 1 | S | 0.0895344 | 54.65  | _AEVYGS(ph)ENESER_          | 2 | 725.280  | -0.15 |
| 2    | IPI00917683 | SUMO1    | 1.00 | 1 | S | 0.0072808 | 91.40  | _(ac)S(ph)DQEAKPSTEDLGDK_   | 2 | 871.362  | -0.14 |
| 463  | IPI00328293 | SRRM1    | 0.85 | 1 | S | 0.0369466 | 72.84  | _KVELSES(ph)EEDKGGK_        | 2 | 807.867  | -0.14 |
| 77   | IPI00009867 | KRT5     | 0.99 | 1 | S | 3.37E-06  | 136.96 | _ISIS(ph)TSGGSFR_           | 2 | 596.274  | -0.14 |
| 2581 | IPI00782992 | SRRM2    | 0.99 | 1 | S | 0.019028  | 84.82  | _RVPS(ph)PTPAPK_            | 2 | 565.292  | -0.13 |
| 4485 | IPI00398002 | PLEC1    | 0.99 | 1 | S | 3.47E-25  | 152.12 | _GYSPYSVSGSGS(ph)TAGSR_     | 2 | 931.883  | -0.13 |
| 304  | IPI00045051 | PURB     | 1.00 | 1 | S | 0.001267  | 78.28  | _RGGGSGGGEES(ph)EGEEVDED_   | 2 | 966.342  | -0.13 |
| 542  | IPI00909569 | HDAC7    | 0.85 | 1 | S | 2.40E-05  | 71.12  | _AQS(ph)SPAAPASLSAPEPASQAR_ | 2 | 1037.484 | -0.13 |
| 672  | IPI00104050 | THRAP3   | 1.00 | 1 | S | 0.0394701 | 69.56  | _S(ph)PEIHR_                | 2 | 409.681  | -0.13 |
| 5752 | IPI00021812 | AHNAK    | 1.00 | 1 | S | 7.57E-14  | 130.49 | _ASLGS(ph)LEGEAEAEASSPK_    | 2 | 906.899  | -0.13 |
| 1305 | IPI00854642 | PDS5A    | 1.00 | 1 | S | 0.0085881 | 86.65  | _AAVGQES(ph)PGGLEAGNAK_     | 2 | 818.372  | -0.12 |
| 7    | IPI00647400 | RNPEP    | 1.00 | 1 | S | 8.31E-06  | 97.94  | _(ac)ASGEHS(ph)PGSGAAR_     | 2 | 653.265  | -0.11 |
| 87   | IPI00102313 | SRA1     | 0.99 | 1 | S | 9.36E-15  | 89.03  | _APRS(ph)PPVGSASPASGVEPTSPV | 3 | 915.768  | -0.11 |
| 353  | IPI00382470 | HSP90AA1 | 1.00 | 1 | S | 1.43E-08  | 127.93 | ESEAR_                      | 2 | 737.285  | -0.11 |
| 66   | IPI00396015 | ACACA    | 1.00 | 1 | S | 0.0009501 | 59.09  | _DKEVS(ph)DDEAEK_           | 2 | 1138.023 | -0.11 |
| 384  | IPI00477535 | ERCC5    | 1.00 | 1 | S | 0.0103524 | 82.24  | _FIIGSVSEDNS(ph)EDEISNLVK_  | 2 | 732.330  | -0.10 |
| 118  | IPI00219301 | MARCKS   | 0.76 | 1 | S | 0.0449025 | 48.27  | _NAPAAVDEGSIS(ph)PR_        | 2 | 999.094  | -0.10 |
| 211  | IPI00012340 | SFRS9    | 0.99 | 1 | S | 0.0361751 | 72.84  | _EAPAEGEAAEPGS(ph)PTAAEGEA  | 3 | 512.222  | -0.10 |
| 181  | IPI00514127 | HDGF     | 1.00 | 1 | S | 2.31E-06  | 147.50 | _ASAASSTSSPK_               | 2 | 640.798  | -0.09 |
| 617  | IPI00719725 | SAPS3    | 1.00 | 1 | S | 1.66E-82  | 224.79 | _GS(ph)PHYFSPFRPY_          | 2 | 1110.436 | -0.09 |
| 563  | IPI00419847 | SORBS3   | 0.97 | 1 | S | 0.0160793 | 77.46  | _RAGDLLEDS(ph)PK_           | 2 | 789.843  | -0.08 |
| 614  | IPI00007334 | ACIN1    | 1.00 | 1 | S | 0.005831  | 96.19  | _IQQFDDGGS(ph)DEEDIWEEK_    | 2 | 612.785  | -0.08 |
| 300  | IPI00010544 | TJAP1    | 1.00 | 1 | S | 0.0458769 | 63.90  | _SPADPTDLGGQTS(ph)PR_       | 2 | 811.871  | -0.08 |
| 881  | IPI00784320 | FAM83H   | 0.99 | 1 | S | 0.0056232 | 78.54  | _RLS(ph)QPESAEK_            | 2 | 607.782  | -0.08 |
| 305  | IPI00219866 | ZRANB2   | 1.00 | 2 | S | 0.0145701 | 80.59  | _GS(ph)PEEELPLPAFEK_        | 2 | 846.356  | -0.08 |
| 307  | IPI00219866 | ZRANB2   | 0.99 | 2 | S | 0.0145701 | 80.59  | _KGS(ph)PTPGFSTR_           | 2 | 846.356  | -0.08 |
| 284  | IPI00216746 | HNRNPK   | 1.00 | 1 | S | 0.2363    | 100.94 | _S(ph)RS(ph)PESQVIGENTK_    | 2 | 625.729  | -0.07 |
| 658  | IPI00006079 | BCLAF1   | 1.00 | 1 | S | 0.0979923 | 117.35 | _S(ph)RS(ph)PESQVIGENTK_    | 2 | 541.268  | -0.06 |
|      |             |          |      |   |   |           |        | _RDYDDM(ox)S(ph)PR_         | 2 |          |       |
|      |             |          |      |   |   |           |        | _IDIS(ph)PSTLR_             | 2 |          |       |

|      |             |                |      |   |   |           |        |                               |   |          |       |
|------|-------------|----------------|------|---|---|-----------|--------|-------------------------------|---|----------|-------|
| 892  | IPI00784320 | FAM83H         | 0.98 | 1 | S | 0.0039116 | 83.05  | _RGS(ph)PTTGFIQK_             | 2 | 700.832  | -0.05 |
| 85   | IPI00398272 | COL17A1        | 0.78 | 1 | S | 0.002879  | 83.61  | _AHS(ph)PASTLPNSPGSTFER_      | 3 | 645.958  | -0.05 |
| 601  | IPI00855787 | TNKS1BP1       | 1.00 | 1 | S | 2.07E-46  | 179.01 | _YESQEPLAGQES(ph)PLPLATR_     | 2 | 1083.509 | -0.05 |
| 2719 | IPI00746934 | UBR4           | 0.99 | 1 | S | 0.0316255 | 104.43 | _HVTLPSS(ph)PR_               | 2 | 537.261  | -0.05 |
| 226  | IPI00414676 | HSP90AB1       | 1.00 | 1 | S | 8.31E-06  | 97.94  | _EKEIS(ph)DDEAEEEEKGEK_       | 2 | 972.902  | -0.05 |
| 39   | IPI00016910 | EIF3C          | 1.00 | 1 | S | 0.0103524 | 82.24  | _QPLLLS(ph)EDEEDTKR_          | 2 | 876.906  | -0.04 |
| 294  | IPI00102752 | RBM15          | 0.83 | 1 | S | 0.0554954 | 68.46  | _SLS(ph)PGGAALGYR_            | 2 | 614.790  | -0.04 |
| 203  | IPI00169383 | PGK1           | 1.00 | 1 | S | 0.495935  | 31.63  | _ALES(ph)PERPFLAILGGAK_       | 3 | 616.992  | -0.03 |
| 398  | IPI00296432 | IWS1           | 1.00 | 2 | S | 0.0247741 | 59.89  | _AAVLS(ph)DS(ph)EDEEKASAK_    | 2 | 905.363  | -0.03 |
| 400  | IPI00296432 | IWS1           | 1.00 | 2 | S | 0.0247741 | 59.89  | _AAVLS(ph)DS(ph)EDEEKASAK_    | 2 | 905.363  | -0.03 |
| 119  | IPI00023640 | PDCD5          | 1.00 | 1 | S | 1         | 33.98  | _KVM(ox)DS(ph)DEDDDY_         | 2 | 714.231  | -0.03 |
| 100  | IPI00333215 | TCEA1          | 1.00 | 1 | S | 0.0030253 | 91.24  | _KKEPAITSQNS(ph)PEAR_         | 3 | 579.284  | -0.03 |
| 272  | IPI00179473 | SQSTM1         | 0.98 | 1 | S | 0.084688  | 55.44  | _LTPVVS(ph)PESSTEELK_         | 2 | 785.848  | -0.02 |
| 1298 | IPI00021954 | GBF1           | 0.87 | 1 | S | 4.17E-16  | 92.64  | _ADAPDAGAQS(ph)DSELPSYHQN     | 3 | 946.733  | -0.02 |
| 409  | IPI00009146 | TRAFD1         | 0.90 | 1 | S | 0.0005188 | 92.08  | DVSLDR_                       | 2 | 838.880  | -0.01 |
| 58   | IPI00465028 | TPI1           | 1.00 | 1 | S | 0.0007    | 96.60  | _LDS(ph)QPQETSPELPR_          | 2 | 811.929  | -0.01 |
| 31   | IPI00022228 | HDLBP          | 1.00 | 1 | S | 0.0157884 | 82.06  | _KQS(ph)LGELIGTLNAAK_         | 2 | 930.401  | 0.00  |
| 540  | IPI00783698 | TMEM87A        | 1.00 | 1 | S | 2.25E-06  | 64.89  | _VATLNS(ph)EEESDPPTYK_        | 3 | 950.774  | 0.00  |
| 137  | IPI00006865 | SEC22B         | 1.00 | 1 | S | 1.06E-05  | 102.36 | _WVEENVPSVTDVALPALLDS(ph)     | 2 | 833.893  | 0.00  |
| 207  | IPI00026781 | FASN           | 1.00 | 1 | S | 0.0056232 | 78.54  | DEER_                         | 2 | 644.769  | 0.00  |
| 50   | IPI00444371 | WDR44          | 1.00 | 1 | S | 0.0687976 | 68.46  | _NLGS(ph)INTELQDVQR_          | 2 | 640.300  | 0.00  |
| 16   | IPI00012268 | PSMD2          | 0.98 | 1 | S | 0.229086  | 31.05  | _LGM(ox)LS(ph)PEGTCK_         | 2 | 847.738  | 0.02  |
| 512  | IPI00006079 | BCLAF1         | 1.00 | 1 | S | 0.0036566 | 85.18  | _VGNES(ph)PVQELK_             | 3 | 551.608  | 0.02  |
| 1121 | IPI00856116 | PALLD          | 1.00 | 1 | S | 3.55E-19  | 147.66 | _DKAPVQPQQS(ph)PAAAPGGTDE     | 2 | 856.350  | 0.02  |
| 421  | IPI00002232 | TAOK1          | 1.00 | 1 | S | 7.73E-24  | 180.61 | KPSGK_                        | 2 | 674.798  | 0.03  |
| 78   | IPI00910275 | DKFZp686M21196 | 0.99 | 1 | S | 0.0256969 | 47.31  | _LPS(ph)VEEAEPKPLPPASKDEDE    | 4 | 821.160  | 0.03  |
| 2716 | IPI00010951 | EPPK1          | 0.94 | 1 | S | 0.0400016 | 45.99  | DIQSILR_                      | 3 | 692.344  | 0.04  |
| 524  | IPI00479424 | KLC1           | 0.97 | 1 | S | 0.0002635 | 89.16  | _QVS(ph)ASELHTSGILGPETLR_     | 2 | 663.327  | 0.04  |
| 177  | IPI00021812 | AHNAK          | 1.00 | 1 | S | 0.0010416 | 133.79 | _SRES(ph)LNVDVVK_             | 2 | 615.768  | 0.04  |
| 656  | IPI00217560 | HIRA           | 0.97 | 2 | S | 0.03249   | 55.39  | _DIDISS(ph)PEFK_              | 3 | 673.315  | 0.05  |
| 666  | IPI00217560 | HIRA           | 0.97 | 2 | T | 0.03249   | 55.39  | _LM(ox)PVS(ph)LSVQSPAALT(ph)A | 3 | 673.315  | 0.05  |
| 255  | IPI00414676 | HSP90AB1       | 1.00 | 1 | S | 5.27E-34  | 186.01 | EK_                           | 2 | 787.791  | 0.05  |
| 19   | IPI00300725 | KRT6A          | 1.00 | 1 | S | 1.10E-05  | 160.14 | _LM(ox)PVS(ph)LSVQSPAALT(ph)A | 2 | 445.182  | 0.05  |
|      |             |                |      |   |   |           |        | _JEDVGS(ph)DEEDDSGK_          |   |          |       |
|      |             |                |      |   |   |           |        | _GFS(ph)ANSAR_                |   |          |       |

|      |             |          |      |   |   |           |        |                                                             |   |          |      |
|------|-------------|----------|------|---|---|-----------|--------|-------------------------------------------------------------|---|----------|------|
| 37   | IPI00300725 | KRT6A    | 1.00 | 1 | S | 0.0088757 | 120.67 | _SGFSSVS(ph)VSR_                                            | 2 | 546.740  | 0.05 |
| 523  | IPI00784320 | FAM83H   | 1.00 | 1 | S | 0.0039116 | 83.05  | _HGS(ph)DPAFAPGPR_                                          | 2 | 644.777  | 0.06 |
| 438  | IPI00304742 | STK10    | 1.00 | 1 | S | 7.82E-19  | 139.73 | _QVAEQGGDLS(ph)PAANR_                                       | 2 | 796.857  | 0.07 |
| 44   | IPI00005996 | HMGA2    | 1.00 | 1 | S | 0.002226  | 87.56  | _KQQQEQTGEPG(ph)PK_                                         | 2 | 767.351  | 0.07 |
| 402  | IPI00006079 | BCLAF1   | 0.99 | 1 | T | 1.74E-06  | 111.24 | _FNQSEGGDDT(ph)EETEDYR_                                     | 2 | 1001.347 | 0.08 |
| 37   | IPI00009236 | CAV1     | 1.00 | 1 | S | 0.161226  | 80.54  | _AMADELS(ph)EK_                                             | 2 | 537.215  | 0.08 |
| 75   | IPI00009867 | KRT5     | 1.00 | 1 | S | 3.37E-06  | 136.96 | _RIS(ph)ISTSGGSFR_                                          | 2 | 674.324  | 0.08 |
| 2    | IPI00219929 | MAX      | 1.00 | 1 | S | 7.66E-23  | 147.66 | _(ac)S(ph)DNDDIEVESDADKR_                                   | 2 | 915.357  | 0.08 |
| 135  | IPI00011268 | RALY     | 1.00 | 1 | S | 0.0049327 | 120.67 | _GRSL(ph)PVPVPR_                                            | 3 | 386.545  | 0.08 |
| 250  | IPI00419249 | PSMA3    | 1.00 | 1 | S | 3.27E-27  | 172.81 | _ESLKEEDES(ph)DDDNM(ox)_                                    | 2 | 876.296  | 0.08 |
| 374  | IPI00382470 | HSP90AA1 | 0.84 | 1 | S | 0.0003074 | 74.64  | _ES(ph)EDKPEIEDVGSDEEEEK_                                   | 3 | 758.300  | 0.08 |
| 385  | IPI00382470 | HSP90AA1 | 1.00 | 1 | S | 0.0003074 | 74.64  | _ESEDKPEIEDVGS(ph)DEEEEK_                                   | 2 | 1136.947 | 0.09 |
| 5    | IPI00013895 | S100A11  | 0.87 | 1 | S | 0.161226  | 80.54  | _(ac)AKIS(ph)SPTETER_                                       | 2 | 670.808  | 0.09 |
| 26   | IPI00021518 | DDB2     | 1.00 | 1 | S | 1.44E-08  | 115.98 | _SRS(ph)PLELEPEAK_                                          | 2 | 718.345  | 0.09 |
| 7    | IPI00072377 | SET      | 1.00 | 1 | S | 1         | 40.65  | _RQS(ph)PLPPQK_                                             | 2 | 565.790  | 0.09 |
| 624  | IPI00816415 | AKAP2    | 0.99 | 1 | S | 1.24E-08  | 72.32  | _S(ph)PGALETPSAAGSQGNTASQG                                  | 3 | 699.315  | 0.09 |
| 619  | IPI00174962 | MICALL1  | 0.83 | 1 | S | 0.0364441 | 56.50  | K_<br>_SPVSPGGS(ph)SSPQLQVK_<br>_RLLEGEDAHLSSSQFSS(ph)GSQSS | 2 | 837.909  | 0.09 |
| 433  | IPI00384444 | KRT14    | 0.77 | 1 | S | 7.16E-102 | 226.23 | R_                                                          | 3 | 849.049  | 0.10 |
| 1666 | IPI00855787 | TNKS1BP1 | 1.00 | 1 | S | 2.14E-08  | 108.77 | _S(ph)AEEGELAESK_                                           | 2 | 615.250  | 0.10 |
| 256  | IPI00644297 | SKI2W    | 0.99 | 1 | S | 0.0476566 | 74.04  | _ASS(ph)LEDLVLK_                                            | 2 | 577.789  | 0.10 |
| 402  | IPI00328293 | SRRM1    | 1.00 | 2 | S | 1         | 28.62  | _HRPS(ph)PPAT(ph)PPPK_                                      | 3 | 481.218  | 0.10 |
| 406  | IPI00328293 | SRRM1    | 1.00 | 2 | T | 1         | 28.62  | _HRPS(ph)PPAT(ph)PPPK_                                      | 3 | 481.218  | 0.10 |
| 641  | IPI00215948 | CTNNA1   | 1.00 | 1 | S | 9.99E-96  | 238.03 | _TPEELDDS(ph)DFETEDFDVR_                                    | 2 | 1119.934 | 0.10 |
| 212  | IPI00021812 | AHNAK    | 0.99 | 1 | S | 8.02E-109 | 251.61 | _LPSGS(ph)GAASPTGSAVDIR_                                    | 2 | 861.907  | 0.11 |
| 537  | IPI00024024 | SFRS17A  | 1.00 | 1 | S | 1         | 33.98  | _VVPEDGS(ph)PEKR_                                           | 2 | 646.798  | 0.12 |
| 2    | IPI00009867 | KRT5     | 0.99 | 1 | S | 0.161226  | 80.54  | _(ac)S(ph)RQSSVSFR_                                         | 2 | 588.264  | 0.12 |
| 253  | IPI00871851 | NEDD5    | 1.00 | 1 | S | 1.08E-15  | 133.99 | _IYHLPDAES(ph)DEDEFKEQTR_                                   | 3 | 839.687  | 0.12 |
| 1362 | IPI00240812 | PDS5B    | 0.83 | 1 | S | 0.0132171 | 65.53  | _AESPES(ph)SAIESTQSTPQK_                                    | 2 | 978.925  | 0.12 |
| 484  | IPI00294840 | AIM1     | 0.94 | 1 | S | 0.029099  | 61.01  | _DTCVQS(ph)PISSFCTDLK_                                      | 2 | 1017.931 | 0.13 |
| 466  | IPI00647837 | ZNF185   | 0.81 | 1 | S | 0.0004493 | 67.31  | _RES(ph)CGSSVLTD FEGKDVATK_                                 | 3 | 756.007  | 0.13 |
| 93   | IPI00021812 | AHNAK    | 1.00 | 1 | S | 0.0009314 | 92.08  | _KGDRS(ph)PEPGQTWTR_                                        | 3 | 565.593  | 0.13 |
| 1549 | IPI00413362 | SIPA1L1  | 0.84 | 1 | S | 0.42736   | 42.96  | _LIDLES(ph)PTPESQK_                                         | 2 | 768.863  | 0.13 |
| 192  | IPI00012512 | RRAS2    | 1.00 | 1 | S | 1.38E-08  | 113.06 | _FQEQECPPS(ph)PEPTR_                                        | 2 | 891.364  | 0.13 |
| 3    | IPI00012011 | CFL1     | 1.00 | 1 | S | 0.0351731 | 73.06  | _(ac)AS(ph)GVAVSDGVIK_                                      | 2 | 612.797  | 0.13 |



|      |             |          |      |   |   |           |        |                             |   |          |      |
|------|-------------|----------|------|---|---|-----------|--------|-----------------------------|---|----------|------|
| 94   | IPI00243221 | NRD1     | 0.99 | 1 | S | 0.0005188 | 92.08  | _RGS(ph)LSNAGDPEIVK_        | 2 | 761.867  | 0.14 |
| 279  | IPI00292228 | GSK3A    | 0.92 | 1 | Y | 0.0555698 | 69.67  | _GEPNVSY(ph)ICSR_           | 2 | 681.281  | 0.14 |
| 181  | IPI00220739 | PGRMC1   | 0.99 | 1 | S | 2.10E-13  | 108.20 | _LLKEGEEPTVYS(ph)DEEEKDESAR | 3 | 910.739  | 0.15 |
| 197  | IPI00107104 | CXorf26  | 1.00 | 1 | S | 2.31E-13  | 124.18 | _GADS(ph)GEEKEEGINR_        | 2 | 785.823  | 0.15 |
| 61   | IPI00216919 | YAP2     | 1.00 | 1 | S | 3.10E-71  | 211.87 | _GDS(ph)ETDLEALFNAVM(ox)NPK | 2 | 1023.940 | 0.16 |
| 109  | IPI00216919 | YAP2     | 0.98 | 1 | S | 0.0088496 | 73.12  | _QAS(ph)TDAGTAGALTPQHVR_    | 3 | 620.958  | 0.16 |
| 498  | IPI00024650 | SLC16A1  | 1.00 | 1 | S | 0.0656179 | 59.28  | _DTEGGPKEEES(ph)PV_         | 2 | 727.290  | 0.16 |
| 135  | IPI00005264 | PKP2     | 0.99 | 1 | S | 1.06E-05  | 102.36 | _GTAQYSSQKS(ph)VEER_        | 2 | 825.362  | 0.16 |
| 264  | IPI00013891 | TRA2A    | 1.00 | 2 | S | 0.0658257 | 93.73  | _RS(ph)PS(ph)PYYSR_         | 2 | 636.744  | 0.17 |
| 266  | IPI00013891 | TRA2A    | 1.00 | 2 | S | 0.0658257 | 93.73  | _RS(ph)PS(ph)PYYSR_         | 2 | 636.744  | 0.17 |
| 924  | IPI00784320 | FAM83H   | 0.87 | 1 | S | 0.327139  | 50.00  | _RS(ph)SPVPPVPER_           | 2 | 650.824  | 0.17 |
| 5077 | IPI00021812 | AHNAK    | 1.00 | 1 | S | 0.429209  | 72.21  | _VDVKS(ph)PK_               | 2 | 426.715  | 0.18 |
| 56   | IPI00290077 | KRT15    | 1.00 | 1 | S | 0.0192298 | 68.52  | _FVSSGS(ph)GGGYGGGM(ox)R_   | 2 | 736.287  | 0.19 |
| 268  | IPI00006079 | BCLAF1   | 0.82 | 1 | S | 0.0780262 | 48.85  | _NTPSQHSHSIQHS(ph)PER_      | 2 | 961.419  | 0.19 |
| 1058 | IPI00178187 | EHBP1    | 1.00 | 1 | S | 1.24E-10  | 161.82 | _KPS(ph)EDEVLNK_            | 2 | 619.787  | 0.19 |
| 186  | IPI00009946 | TOMM34   | 1.00 | 1 | S | 0.0002635 | 89.16  | _NRVPS(ph)AGDVEK_           | 2 | 626.290  | 0.20 |
| 425  | IPI00900260 | ARHGEF7  | 1.00 | 1 | S | 0.0979923 | 117.35 | _M(ox)S(ph)GFIYQGK_         | 2 | 563.736  | 0.20 |
| 44   | IPI00384444 | KRT14    | 0.98 | 1 | S | 0.0160793 | 77.46  | _APS(ph)TYGGGLSVSSSR_       | 2 | 753.335  | 0.20 |
| 199  | IPI00003843 | TJP2     | 0.91 | 1 | S | 0.0020986 | 130.93 | _S(ph)RSWEDSPER_            | 2 | 664.767  | 0.20 |
| 1029 | IPI00152011 | ARHGAP29 | 1.00 | 1 | S | 0.61353   | 29.51  | _LLLAS(ph)PPNER_            | 2 | 595.302  | 0.21 |
| 102  | IPI00182728 | VPS4B    | 1.00 | 1 | S | 6.39E-07  | 69.25  | _GNDS(ph)DGEGESDDPEK_       | 2 | 815.773  | 0.21 |
| 188  | IPI00789551 | MATR3    | 1.00 | 1 | S | 0.0368975 | 97.77  | _RDS(ph)FDDR_               | 2 | 495.687  | 0.21 |
| 37   | IPI00479186 | PKM2     | 1.00 | 1 | S | 3.37E-06  | 136.96 | _LDIDS(ph)PPITAR_           | 2 | 639.310  | 0.21 |
| 886  | IPI00328293 | SRRM1    | 1.00 | 1 | S | 2.65E-48  | 192.34 | _KETES(ph)EAEDNLDLEK_       | 2 | 972.902  | 0.22 |
| 241  | IPI00002538 | PDPK1    | 0.97 | 1 | S | 0.0048027 | 62.19  | _ANS(ph)FVGTAQYVSPPELLTEK_  | 2 | 1067.509 | 0.22 |
| 680  | IPI00028931 | DSG2     | 1.00 | 1 | S | 0.0171415 | 69.16  | _VVPSFLPVDQGGG(ph)LVGR_     | 2 | 903.961  | 0.23 |
| 171  | IPI00044748 | FMNL2    | 1.00 | 1 | S | 0.0409475 | 95.09  | _S(ph)IEDLHR_               | 2 | 475.211  | 0.23 |
| 226  | IPI00480028 | ABI1     | 0.90 | 1 | S | 0.473856  | 59.23  | _LGSQHS(ph)PGR_             | 2 | 509.727  | 0.23 |
| 22   | IPI00021405 | LMNA     | 0.96 | 1 | S | 0.0005188 | 92.08  | _SGAQASSTPLS(ph)PTR_        | 2 | 720.330  | 0.23 |
| 448  | IPI00217963 | KRT16    | 0.88 | 1 | S | 0.0039116 | 83.05  | _EVFTSSS(ph)SSSSR_          | 2 | 670.772  | 0.23 |
| 474  | IPI00014068 | PAK4     | 1.00 | 1 | S | 1.48E-08  | 117.38 | _S(ph)LVGTPYWM(ox)APELISR_  | 2 | 958.455  | 0.23 |
| 2115 | IPI00871932 | SPTBN1   | 1.00 | 1 | S | 0.0151885 | 147.50 | _RPPS(ph)PEPSTK_            | 2 | 588.276  | 0.25 |
| 1225 | IPI00412650 | SVIL     | 0.96 | 1 | S | 0.0236849 | 57.73  | _GLAS(ph)PTAITPVASAICGK_    | 2 | 897.447  | 0.25 |
| 604  | IPI00001632 | KIAA1522 | 1.00 | 1 | S | 1         | 33.98  | _GLAGPPAS(ph)PGK_           | 2 | 516.250  | 0.26 |
| 418  | IPI00029601 | CTTN     | 0.92 | 1 | S | 1.38E-08  | 113.06 | _LPSS(ph)PVYEDAASFK_        | 2 | 795.858  | 0.26 |
| 135  | IPI00293427 | ZNRF2    | 1.00 | 1 | S | 0.0039116 | 83.05  | _DRPVGGG(ph)PGGPR_          | 2 | 616.283  | 0.27 |
| 335  | IPI00549766 | FAM40A   | 1.00 | 1 | S | 0.0100329 | 77.71  | _AAS(ph)PPASASDLIEQQQK_     | 2 | 910.925  | 0.27 |

|      |             |          |      |   |   |           |        |                              |   |          |      |
|------|-------------|----------|------|---|---|-----------|--------|------------------------------|---|----------|------|
| 91   | IPI00329108 | SCEL     | 0.98 | 1 | S | 0.884375  | 49.59  | _YSS(ph)DDTLDR_              | 2 | 576.216  | 0.27 |
| 243  | IPI00419249 | PSMA3    | 0.99 | 1 | S | 3.27E-27  | 172.81 | _ES(ph)LKEEDESDDNM(ox)_      | 3 | 584.533  | 0.28 |
| 583  | IPI00398002 | PLEC1    | 1.00 | 1 | S | 3.69E-05  | 100.32 | _SDEGQLS(ph)PATR_            | 2 | 620.764  | 0.28 |
| 836  | IPI00855787 | TNKS1BP1 | 1.00 | 1 | S | 5.19E-38  | 208.96 | _S(ph)QEADVQDWEFR_           | 2 | 795.317  | 0.29 |
| 716  | IPI00006298 | PPIG     | 0.90 | 1 | S | 0.0687976 | 68.46  | _IRS(ph)SVEKENQK_            | 2 | 699.343  | 0.29 |
| 337  | IPI00009867 | KRT5     | 1.00 | 1 | S | 0.0749993 | 63.59  | _NLDLDS(ph)IIAEVK_           | 2 | 705.350  | 0.29 |
| 151  | IPI00005264 | PKP2     | 1.00 | 1 | S | 1.44E-08  | 115.98 | _LEIS(ph)PDSSPER_            | 2 | 655.287  | 0.29 |
| 22   | IPI00300725 | KRT6A    | 1.00 | 1 | S | 1.10E-05  | 160.14 | _GFSANS(ph)AR_               | 2 | 445.182  | 0.29 |
| 236  | IPI00784233 | GIGYF2   | 1.00 | 1 | S | 0.157971  | 63.85  | _WRPHS(ph)PDGPR_             | 3 | 428.859  | 0.29 |
| 1620 | IPI00855787 | TNKS1BP1 | 1.00 | 2 | S | 3.19E-15  | 132.59 | _VPS(ph)S(ph)DEEVVEEPQSR_    | 2 | 923.861  | 0.30 |
| 1621 | IPI00855787 | TNKS1BP1 | 1.00 | 2 | S | 3.19E-15  | 132.59 | _VPS(ph)S(ph)DEEVVEEPQSR_    | 2 | 923.861  | 0.30 |
| 276  | IPI00021129 | AP3B1    | 1.00 | 1 | S | 1.43E-08  | 127.93 | _NFYES(ph)DDDQKEK_           | 2 | 799.306  | 0.30 |
| 242  | IPI00009867 | KRT5     | 1.00 | 1 | S | 0.180416  | 114.35 | _LDS(ph)ELR_                 | 2 | 406.681  | 0.30 |
| 515  | IPI00397376 | ZC3H14   | 1.00 | 1 | S | 0.769956  | 38.47  | _DLVQDPKPAS(ph)PK_           | 2 | 687.837  | 0.31 |
| 1832 | IPI00291607 | ITPR3    | 0.89 | 1 | S | 0.0749993 | 63.59  | _VAS(ph)FSIPGSSSR_           | 2 | 637.792  | 0.31 |
| 337  | IPI00290857 | KRT3     | 0.98 | 1 | T | 0.001094  | 67.31  | _T(ph)LYDAELSQQSHISDTSVVLS   | 3 | 1050.797 | 0.31 |
| 4466 | IPI00377245 | MLL2     | 1.00 | 1 | S | 0.0580991 | 58.94  | M(ox)DNNR_                   | 2 | 628.362  | 0.31 |
| 2718 | IPI00010951 | EPPK1    | 0.82 | 1 | S | 0.0400016 | 45.99  | _ALS(ph)PVIPLIPR_            | 3 | 692.344  | 0.32 |
| 492  | IPI00395337 | FIP1L1   | 0.75 | 1 | S | 0.0007    | 96.60  | _QVSAS(ph)ELHTSGILGPETLR_    | 2 | 898.860  | 0.32 |
| 261  | IPI00550191 | C9orf78  | 0.95 | 1 | S | 0.0921243 | 46.78  | _DHS(ph)PTPSVFNSDEER_        | 3 | 629.958  | 0.32 |
| 112  | IPI00002349 | NUFIP2   | 0.91 | 1 | S | 0.0593575 | 61.07  | _VGDEKPEPERS(ph)PPNR_        | 2 | 742.325  | 0.32 |
| 399  | IPI00029601 | CTTN     | 0.82 | 1 | T | 0.139117  | 41.67  | _NLS(ph)SDEATNPISR_          | 3 | 671.993  | 0.33 |
| 599  | IPI00020984 | CANX     | 0.97 | 1 | S | 0.0171415 | 69.16  | _AKT(ph)QTPPVSPAPQTEER_      | 2 | 966.853  | 0.33 |
| 672  | IPI00855787 | TNKS1BP1 | 1.00 | 1 | S | 0.0213776 | 77.65  | _SDAEEDGGTVS(ph)QEEEDR_      | 2 | 689.288  | 0.33 |
| 18   | IPI00011689 | EEF2K    | 1.00 | 1 | S | 0.0687976 | 68.46  | _AS(ph)PEPPGPSSSR_           | 2 | 597.761  | 0.33 |
| 153  | IPI00003443 | IFI16    | 1.00 | 1 | S | 0.0033442 | 46.91  | _LEGVDGGQS(ph)PR_            | 2 | 1150.980 | 0.34 |
| 449  | IPI00464952 | SFRS11   | 1.00 | 1 | S | 4.60E-05  | 145.18 | _VSEEQTQPPS(ph)PAGAGM(ox)ST  | 2 | 518.757  | 0.35 |
| 405  | IPI00029601 | CTTN     | 1.00 | 1 | S | 4.02E-18  | 141.14 | AM(ox)GR_                    | 2 | 907.920  | 0.35 |
| 489  | IPI00410259 | PHLDB2   | 1.00 | 1 | S | 6.96E-41  | 171.65 | _KPIETGS(ph)PK_              | 2 | 1196.517 | 0.35 |
| 385  | IPI00742743 | TP53BP1  | 0.88 | 1 | S | 0.0157884 | 82.06  | _TQTPPVS(ph)PAPQTEER_        | 2 | 906.414  | 0.37 |
| 435  | IPI00384444 | KRT14    | 1.00 | 1 | S | 7.16E-102 | 226.23 | _LQLS(ph)DEESVFEEALM(ox)SPDT | 2 | 1195.019 | 0.39 |
| 21   | IPI00009867 | KRT5     | 1.00 | 1 | S | 1.38E-08  | 113.06 | R_                           | 2 | 745.848  | 0.40 |
| 366  | IPI00009032 | SSB      | 1.00 | 1 | S | 2.43E-05  | 70.68  | _STPFIVPSS(ph)PTEQEGR_       | 2 | 802.659  | 0.40 |
| 2047 | IPI00902614 | USP24    | 1.00 | 1 | S | 3.69E-05  | 100.32 | _LLEGEDAHLSSSQFSSGS(ph)QSSR  | 2 | 632.303  | 0.41 |
| 545  | IPI00010544 | TJAP1    | 0.92 | 1 | S | 2.61E-09  | 117.38 | _SFSTAS(ph)AITPSVSR_         | 2 | 869.904  | 0.41 |
|      |             |          |      |   |   |           |        | _FAS(ph)DDEHDEHDENGATGPVK    |   |          |      |
|      |             |          |      |   |   |           |        | R_                           |   |          |      |
|      |             |          |      |   |   |           |        | _VSDQNS(ph)PVLPK_            |   |          |      |
|      |             |          |      |   |   |           |        | _KDS(ph)LTQAQEQGNLLN_        |   |          |      |

|      |             |         |      |   |   |           |        |                               |   |          |      |
|------|-------------|---------|------|---|---|-----------|--------|-------------------------------|---|----------|------|
| 1124 | IPI00782992 | SRRM2   | 1.00 | 1 | S | 0.399492  | 54.27  | _GEFSAS(ph)PM(ox)LK_          | 2 | 581.746  | 0.41 |
| 12   | IPI00219160 | RPL34   | 1.00 | 1 | S | 0.0088757 | 120.67 | _RLS(ph)YNTASNK_              | 2 | 617.285  | 0.42 |
| 99   | IPI00021812 | AHNAK   | 0.89 | 1 | T | 0.0009314 | 92.08  | _KGDSPPEPGQT(ph)WTR_          | 2 | 847.886  | 0.42 |
| 14   | IPI00181617 | RBM34   | 1.00 | 1 | S | 0.0073517 | 83.05  | _S(ph)VQEGENPDDGVR_           | 2 | 741.299  | 0.42 |
| 703  | IPI00020060 | SLC9A1  | 1.00 | 1 | S | 4.84E-23  | 193.40 | _IGS(ph)DPLAYEPK_             | 2 | 635.292  | 0.43 |
| 547  | IPI00019205 | EAP1    | 0.96 | 1 | S | 0.121466  | 44.42  | _KAS(ph)PEPPDSAEGALK_         | 2 | 788.866  | 0.43 |
| 552  | IPI00017292 | CTNNB1  | 0.90 | 1 | S | 0.0072808 | 91.40  | _RTS(ph)M(ox)GGTQQQFVEGVR_    | 3 | 626.284  | 0.43 |
| 122  | IPI00220402 | PPP1R2  | 0.97 | 2 | S | 0.203365  | 35.64  | _IQEQES(ph)S(ph)GEEDSDLSPEER_ | 2 | 1162.428 | 0.43 |
| 121  | IPI00220402 | PPP1R2  | 0.91 | 2 | S | 0.203365  | 35.64  | _IQEQES(ph)S(ph)GEEDSDLSPEER_ | 2 | 1162.428 | 0.43 |
| 296  | IPI00807625 | FNBP1   | 0.76 | 1 | S | 0.427813  | 33.98  | _TVS(ph)DNLSNSR_              | 2 | 630.267  | 0.43 |
| 401  | IPI00029601 | CTTN    | 0.99 | 1 | T | 4.02E-18  | 141.14 | _AKTQT(ph)PPVSPAPQPTTEER_     | 3 | 671.993  | 0.44 |
| 632  | IPI00157757 | MICAL1  | 0.95 | 1 | S | 0.0030472 | 51.86  | _S(ph)M(ox)AHSPGPVVSQASPGTSS_ | 3 | 847.068  | 0.44 |
| 112  | IPI00306840 | SGPP1   | 1.00 | 1 | S | 4.76E-12  | 120.05 | _AVLFLSK_                     | 3 | 847.068  | 0.44 |
| 12   | IPI00021405 | LMNA    | 1.00 | 1 | S | 0.0005188 | 92.08  | _NS(ph)LTGEEGLAR_             | 2 | 677.804  | 0.44 |
| 403  | IPI00472794 | FCHO2   | 1.00 | 1 | S | 0.268802  | 69.56  | _S(ph)GAQASSTPLSPTR_          | 2 | 720.330  | 0.45 |
| 925  | IPI00784320 | FAM83H  | 0.81 | 1 | S | 0.327139  | 50.00  | _NLS(ph)NEELTK_               | 2 | 564.253  | 0.46 |
| 201  | IPI00003843 | TJP2    | 0.90 | 1 | S | 0.0020986 | 130.93 | _RSS(ph)PVPPVPER_             | 2 | 650.824  | 0.46 |
| 8    | IPI00009867 | KRT5    | 1.00 | 1 | S | 0.161226  | 80.54  | _SRS(ph)WEDSPER_              | 2 | 664.767  | 0.47 |
| 473  | IPI00438229 | TRIM28  | 1.00 | 1 | S | 1.13E-05  | 133.79 | _QSSVS(ph)FR_                 | 2 | 445.692  | 0.47 |
| 248  | IPI00477686 | GTF2F2  | 1.00 | 1 | S | 0.0789022 | 92.16  | _S(ph)GEGEVSGLM(ox)R_         | 2 | 609.247  | 0.47 |
| 241  | IPI00396171 | MAP4    | 0.90 | 1 | T | 1.06E-05  | 102.36 | _HYQGEESK(ph)D_               | 2 | 586.716  | 0.47 |
| 1927 | IPI00782992 | SRRM2   | 0.97 | 2 | T | 1         | 26.86  | _DM(ox)ESPT(ph)KLDVTLAK_      | 2 | 822.384  | 0.48 |
| 1925 | IPI00782992 | SRRM2   | 0.91 | 2 | S | 1         | 26.86  | _S(ph)RT(ph)PPVTR_            | 3 | 358.490  | 0.49 |
| 541  | IPI00300725 | KRT6A   | 0.98 | 1 | S | 0.0171415 | 69.16  | _S(ph)RT(ph)PPVTR_            | 3 | 358.490  | 0.49 |
| 247  | IPI00395887 | TMX1    | 0.99 | 1 | S | 1.01E-13  | 129.11 | _AIGGGLSS(ph)VGGGSSTIK_       | 2 | 764.374  | 0.49 |
| 347  | IPI00216047 | SMARCC2 | 0.99 | 1 | S | 0.0236849 | 57.73  | _VEEEQEAEDEEDVS(ph)EEEEASK_   | 2 | 1195.450 | 0.49 |
| 239  | IPI00396171 | MAP4    | 0.91 | 1 | S | 1.06E-05  | 102.36 | _DM(ox)DEPS(ph)PVPNVVEEVLTK_  | 2 | 1046.463 | 0.50 |
| 14   | IPI00549725 | PGAM1   | 1.00 | 1 | S | 3.69E-05  | 100.32 | _DM(ox)ES(ph)PTKLDVTLAK_      | 3 | 548.591  | 0.51 |
| 2204 | IPI00026781 | FASN    | 1.00 | 1 | T | 6.58E-05  | 59.42  | _HGES(ph)AWNLENR_             | 2 | 696.788  | 0.51 |
| 41   | IPI00304409 | CARHSP1 | 0.87 | 1 | S | 0.327139  | 50.00  | _ADEASELACTP(ph)PK_           | 2 | 734.805  | 0.52 |
| 30   | IPI00299667 | VAMP4   | 1.00 | 1 | S | 3.45E-09  | 121.73 | _GNVVPS(ph)PLPTR_             | 2 | 608.808  | 0.52 |
| 31   | IPI00009867 | KRT5    | 0.99 | 1 | S | 0.257113  | 88.27  | _RNLEDDDS(ph)DEEEDFFLR_       | 3 | 741.314  | 0.52 |
| 126  | IPI00306604 | ITGA5   | 0.91 | 1 | S | 7.57E-14  | 130.49 | _TS(ph)FTSVSR_                | 2 | 482.710  | 0.52 |
| 1538 | IPI00880094 | RGNEF   | 1.00 | 1 | S | 0.0971597 | 53.28  | _LLESLS(ph)SSEGEPEVEYK_       | 2 | 1031.959 | 0.52 |
| 876  | IPI00782992 | SRRM2   | 0.98 | 1 | S | 0.403216  | 44.87  | _S(ph)LPAVLLPGGPEVM(ox)ELNR_  | 2 | 994.500  | 0.52 |
| 52   | IPI00027834 | HNRNPL  | 1.00 | 1 | S | 0.0508231 | 59.28  | _SCFESS(ph)PDPELK_            | 2 | 738.292  | 0.52 |
|      |             |         |      |   |   |           |        | _YYGGGS(ph)EGGRAPK_           | 2 | 689.793  | 0.54 |

|      |             |                |      |   |   |           |        |                                                                |   |          |      |
|------|-------------|----------------|------|---|---|-----------|--------|----------------------------------------------------------------|---|----------|------|
| 52   | IPI00871279 | SLC38A1        | 0.96 | 1 | S | 0.107595  | 88.27  | _S(ph)LTNSHLEK_                                                | 2 | 554.755  | 0.54 |
| 687  | IPI00006298 | PPIG           | 0.99 | 1 | S | 0.157971  | 63.85  | _ADRQSQS(ph)PFSK_                                              | 2 | 615.761  | 0.54 |
| 936  | IPI00784320 | FAM83H         | 1.00 | 1 | S | 0.0005188 | 92.08  | _RGS(ph)LTLTISGESPK_                                           | 2 | 763.385  | 0.55 |
| 1943 | IPI00019502 | MYH9           | 1.00 | 1 | S | 5.23E-14  | 143.95 | _KGAGDGS(ph)DEEVDGKADGAEA<br>K_<br>_RDSFDDRGRPS(ph)LNPVLDYDHGS | 3 | 695.958  | 0.57 |
| 195  | IPI00789551 | MATR3          | 0.83 | 1 | S | 0.0004822 | 51.91  | R_                                                             | 4 | 650.290  | 0.57 |
| 346  | IPI00883925 | FLJ00169       | 1.00 | 1 | S | 8.72E-12  | 128.36 | _S(ph)AGEEEDGPVLTDEQK_                                         | 2 | 892.367  | 0.57 |
| 1003 | IPI00784320 | FAM83H         | 1.00 | 1 | S | 4.74E-30  | 159.38 | _RLS(ph)LGQGDSTEAAATEER_                                       | 2 | 950.426  | 0.58 |
| 586  | IPI00414315 | EPS8L2         | 0.98 | 1 | S | 0.399492  | 54.27  | _YWGPAS(ph)PTHK_                                               | 2 | 612.266  | 0.60 |
| 725  | IPI00328293 | SRRM1          | 0.91 | 2 | S | 1         | 19.17  | _RQS(ph)PS(ph)PSTRPIR_                                         | 2 | 771.353  | 0.60 |
| 486  | IPI00555838 | MARK2          | 1.00 | 1 | S | 0.884375  | 49.59  | _SRNS(ph)PLLER_                                                | 2 | 576.282  | 0.60 |
| 83   | IPI00021831 | PRKAR1A        | 0.99 | 1 | S | 0.0185932 | 60.55  | _TDSREDEIS(ph)PPPPNPVVK_                                       | 3 | 686.324  | 0.61 |
| 320  | IPI00007277 | LRRFIP2        | 0.78 | 1 | S | 0.0160793 | 77.46  | _NSASATTPS(ph)GNSSR_                                           | 2 | 765.333  | 0.62 |
| 196  | IPI00816770 | DKFZp779D0769  | 1.00 | 1 | S | 8.45E-11  | 115.27 | _RGS(ph)IGENQIKDEK_                                            | 2 | 777.370  | 0.63 |
| 830  | IPI00871686 | CLASP2         | 0.97 | 1 | S | 0.0171415 | 69.16  | _VLNTGS(ph)DVEEAVADALK_                                        | 2 | 905.927  | 0.64 |
| 105  | IPI00217970 | RTKN2          | 1.00 | 1 | S | 0.0259568 | 111.83 | _IAIS(ph)DIR_                                                  | 2 | 434.220  | 0.64 |
| 82   | IPI00025512 | HSPB1          | 0.99 | 1 | S | 0.019028  | 84.82  | _QLS(ph)SGVSEIR_                                               | 2 | 578.274  | 0.64 |
| 1057 | IPI00395813 | ZNF687         | 1.00 | 1 | S | 0.344374  | 46.27  | _HGLQLGAQS(ph)PGR_                                             | 2 | 650.812  | 0.64 |
| 117  | IPI00396015 | ACACA          | 1.00 | 1 | S | 0.019028  | 84.82  | _SSM(ox)S(ph)GLHLVK_                                           | 2 | 577.767  | 0.65 |
| 791  | IPI00297578 | FILIP1L        | 1.00 | 1 | S | 0.005831  | 96.19  | _RIS(ph)DPQVFSK_                                               | 2 | 628.805  | 0.66 |
| 140  | IPI00013508 | ACTN1          | 1.00 | 1 | S | 0.0458769 | 63.90  | _FAIQDIS(ph)VEETSAK_                                           | 2 | 809.374  | 0.66 |
| 79   | IPI00009867 | KRT5           | 0.92 | 1 | S | 3.37E-06  | 136.96 | _ISISTS(ph)GGSFR_                                              | 2 | 596.274  | 0.66 |
| 594  | IPI00018914 | PTPN14         | 0.88 | 1 | S | 0.0749993 | 63.59  | _YVSGSS(ph)PDLVTR_                                             | 2 | 680.811  | 0.67 |
| 480  | IPI00299571 | PDIA6          | 1.00 | 1 | S | 5.52E-05  | 62.17  | _DGELPVEDDIDLS(ph)DVELDDLK<br>DEL_                             | 2 | 1419.621 | 0.68 |
| 16   | IPI00009867 | KRT5           | 0.91 | 1 | S | 1.38E-08  | 113.06 | _S(ph)FSTASAITPSVSR_                                           | 2 | 745.848  | 0.68 |
| 379  | IPI00104050 | THRAP3         | 0.97 | 1 | S | 0.133651  | 54.65  | _GSFS(ph)DTGLGDGK_                                             | 2 | 610.745  | 0.68 |
| 873  | IPI00000105 | MVP            | 0.81 | 1 | S | 8.17E-06  | 66.93  | _VASGSPGEGIS(ph)PQSAQAPQA<br>PGDNHVVPLR_                       | 3 | 1067.189 | 0.69 |
| 191  | IPI00910275 | DKFZp686M21196 | 1.00 | 1 | S | 0.164547  | 58.94  | _GVPEKS(ph)PVLEK_                                              | 2 | 631.823  | 0.69 |
| 852  | IPI00154915 | PARD3          | 1.00 | 1 | S | 0.340526  | 37.06  | _S(ph)M(ox)DLGIADETK_                                          | 2 | 638.262  | 0.74 |
| 235  | IPI00030399 | BNIP2          | 0.90 | 1 | S | 0.0213776 | 77.65  | _KGS(ph)ITEYTAEEK_                                             | 2 | 753.840  | 0.74 |
| 2514 | IPI00299512 | NF1            | 0.84 | 1 | T | 0.0071766 | 70.05  | _GSEGYLAATYPTVGQT(ph)SPR_                                      | 2 | 1017.962 | 0.74 |
| 24   | IPI00033600 | PPP1R7         | 1.00 | 2 | S | 0.352385  | 36.15  | _RVES(ph)EES(ph)GDEEGKK_                                       | 2 | 869.832  | 0.75 |
| 1192 | IPI00925413 | EIF4G1         | 0.99 | 1 | S | 0.0306612 | 100.94 | _S(ph)FSKEVEER_                                                | 2 | 595.758  | 0.75 |
| 82   | IPI00784614 | Ov/Br septin   | 0.84 | 1 | S | 0.0056232 | 78.54  | _HVDSLS(ph)QRSRK_                                              | 2 | 667.317  | 0.75 |
| 959  | IPI00923493 | TBC1D2B        | 1.00 | 1 | S | 0.029099  | 61.01  | _DTSPDKGELVS(ph)DEEEDT_                                        | 2 | 973.375  | 0.76 |
| 5    | IPI00009867 | KRT5           | 0.92 | 1 | S | 0.161226  | 80.54  | _(ac)SRQS(ph)SVSFR_                                            | 2 | 588.264  | 0.78 |
| 771  | IPI00748577 | SLC26A6        | 0.99 | 1 | S | 0.327139  | 50.00  | _PVPDS(ph)PVSVTR_                                              | 2 | 617.297  | 0.79 |
| 41   | IPI00910738 | KRT6B          | 0.97 | 1 | S | 0.0143277 | 52.70  | _S(ph)RGSGLGGACGGAGFGSR_                                       | 3 | 583.249  | 0.79 |

|      |             |          |      |   |   |           |        |                                   |   |          |      |
|------|-------------|----------|------|---|---|-----------|--------|-----------------------------------|---|----------|------|
| 298  | IPI00328715 | MTDH     | 1.00 | 1 | S | 0.0198305 | 68.46  | _LSSQIS(ph)AGEEK_                 | 2 | 614.776  | 0.79 |
| 307  | IPI00008274 | CAP1     | 0.86 | 1 | T | 0.0083039 | 73.72  | _SGPKPFSAPKQQT(ph)SPSPK_          | 2 | 959.477  | 0.79 |
| 110  | IPI00003443 | IFI16    | 0.83 | 1 | S | 0.354552  | 34.96  | _EVDATS(ph)PAPSTSSTVK_            | 2 | 828.872  | 0.80 |
| 965  | IPI00303343 | SCAF1    | 0.99 | 1 | S | 0.0039116 | 83.05  | _GAEETSWS(ph)GEER_                | 2 | 709.267  | 0.81 |
| 435  | IPI00289082 | PTPN12   | 1.00 | 1 | S | 0.107246  | 84.57  | _LNE(ph)FEIK_                     | 2 | 465.720  | 0.82 |
| 106  | IPI00029834 | RTKN     | 1.00 | 1 | S | 0.0027346 | 112.01 | _RPS(ph)DSGPPAER_                 | 2 | 624.772  | 0.84 |
| 1057 | IPI00397383 | KIF1B    | 1.00 | 1 | S | 0.0228478 | 80.54  | _SGLS(ph)LEELR_                   | 2 | 542.258  | 0.84 |
| 701  | IPI00022058 | ASAP2    | 1.00 | 1 | S | 2.57E-30  | 155.40 | _LLHEDLDES(ph)DDDM(ox)DEK_        | 2 | 1007.877 | 0.84 |
| 218  | IPI00514127 | HDGF     | 0.95 | 1 | S | 1         | 33.98  | _NSTPS(ph)EPGSGR_                 | 2 | 584.735  | 0.84 |
| 9    | IPI00917683 | SUMO1    | 0.86 | 1 | S | 0.0072808 | 91.40  | _(ac)SDQEAKPS(ph)TEDLGDKK_        | 2 | 935.409  | 0.85 |
| 567  | IPI00009867 | KRT5     | 0.98 | 1 | S | 0.002111  | 95.97  | _GLVGVFGS(ph)GGGSSSVK_            | 2 | 760.343  | 0.87 |
| 39   | IPI00217963 | KRT16    | 1.00 | 1 | S | 3.69E-05  | 100.32 | _ISSVLAGGS(ph)CR_                 | 2 | 593.768  | 0.88 |
| 600  | IPI00479424 | KLC1     | 0.99 | 1 | S | 0.0106106 | 73.06  | _ASS(ph)LNVLNVGGK_                | 2 | 619.811  | 0.89 |
| 429  | IPI00328293 | SRRM1    | 1.00 | 2 | S | 0.595349  | 48.70  | _SRVS(ph)VS(ph)PGR_               | 2 | 552.734  | 0.89 |
| 97   | IPI00163505 | RBM39    | 1.00 | 1 | S | 0.0789022 | 92.16  | _YRS(ph)PYSGPK_                   | 2 | 567.753  | 0.90 |
| 51   | IPI00020124 | PI4K2A   | 1.00 | 2 | S | 7.41E-05  | 96.02  | _VAAAAGSGPS(ph)PPGS(ph)PGHD<br>R_ | 2 | 924.377  | 0.90 |
| 47   | IPI00020124 | PI4K2A   | 1.00 | 2 | S | 7.41E-05  | 96.02  | _VAAAAGSGPS(ph)PPGS(ph)PGHD<br>R_ | 2 | 924.377  | 0.90 |
| 148  | IPI00398272 | COL17A1  | 1.00 | 2 | S | 0.0658257 | 93.73  | _LQS(ph)AS(ph)PSTR_               | 2 | 553.718  | 0.93 |
| 29   | IPI00009544 | RALBP1   | 0.99 | 1 | S | 0.0580991 | 58.94  | _TPS(ph)SEEISPTK_                 | 2 | 628.276  | 0.93 |
| 440  | IPI00641770 | PI4KB    | 1.00 | 1 | S | 0.0023278 | 82.24  | _S(ph)VENLPECGITHEQR_             | 2 | 924.901  | 0.93 |
| 178  | IPI00902997 | FAM134A  | 1.00 | 1 | S | 0.0192298 | 68.52  | _QALDS(ph)EEEEEDVAAK_             | 2 | 871.854  | 0.94 |
| 578  | IPI00174962 | MICALL1  | 1.00 | 1 | S | 1.38E-08  | 113.06 | _VEQM(ox)PQAS(ph)PGLAPR_          | 2 | 788.863  | 0.97 |
| 137  | IPI00643342 | PEA15    | 1.00 | 1 | S | 0.0213776 | 77.65  | _QPS(ph)EEEEIK_                   | 2 | 576.763  | 0.97 |
| 364  | IPI00413817 | SERINC1  | 0.94 | 1 | S | 0.209963  | 42.96  | _SDGS(ph)LEDGDDVHR_               | 2 | 741.281  | 0.99 |
| 308  | IPI00008274 | CAP1     | 0.98 | 1 | S | 0.0083039 | 73.72  | _PQTS(ph)PSPK_                    | 2 | 461.208  | 1.01 |
| 253  | IPI00104050 | THRAP3   | 0.96 | 2 | S | 0.183227  | 40.22  | _ERS(ph)PALKS(ph)PLQSVVVR_        | 3 | 642.659  | 1.03 |
| 3803 | IPI00025276 | TNXB     | 1.00 | 2 | S | 0.053661  | 60.67  | _TLS(ph)PVLES(ph)PR_              | 2 | 629.778  | 1.03 |
| 3798 | IPI00025276 | TNXB     | 0.88 | 2 | S | 0.053661  | 60.67  | _TLS(ph)PVLES(ph)PR_              | 2 | 629.778  | 1.03 |
| 261  | IPI00217952 | GFPT1    | 0.97 | 1 | S | 8.31E-06  | 97.94  | _VDS(ph)TTCLFPVEEK_               | 2 | 802.849  | 1.05 |
| 14   | IPI00294501 | DHCR7    | 1.00 | 1 | S | 0.12577   | 50.00  | _AKS(ph)LDGVTNDR_                 | 2 | 628.288  | 1.05 |
| 3    | IPI00647400 | RNPEP    | 0.97 | 1 | S | 8.31E-06  | 97.94  | _(ac)AS(ph)GEHSPGSGAAR_           | 2 | 653.265  | 1.07 |
| 161  | IPI00456887 | HNRNPUL2 | 0.98 | 1 | S | 0.13537   | 50.86  | _REEDEPEERS(ph)GDETPGSEVPGD<br>K_ | 3 | 875.359  | 1.11 |
| 582  | IPI00021634 | KLC2     | 1.00 | 1 | S | 0.473856  | 59.23  | _ASS(ph)LNFLNK_                   | 2 | 537.255  | 1.11 |
| 142  | IPI00513853 | STX12    | 1.00 | 1 | S | 0.0076441 | 84.82  | _AGSRLS(ph)AEER_                  | 3 | 385.843  | 1.12 |
| 2670 | IPI00291607 | ITPR3    | 1.00 | 1 | S | 0.0351731 | 73.06  | _LGFVDVQNCIS(ph)R_                | 2 | 744.339  | 1.12 |
| 21   | IPI00398779 | PLEC1    | 0.96 | 1 | S | 8.31E-06  | 97.94  | _TSS(ph)EDNLYLAVLR_               | 2 | 780.869  | 1.13 |

|      |             |                |      |   |   |           |        |                            |   |          |      |
|------|-------------|----------------|------|---|---|-----------|--------|----------------------------|---|----------|------|
| 294  | IPI00856045 | AHNAK2         | 0.92 | 1 | S | 4.86E-31  | 160.57 | _DAHDVS(ph)PTSTDTEAQLTVER_ | 2 | 1126.489 | 1.13 |
| 480  | IPI00396171 | MAP4           | 0.94 | 1 | T | 0.169713  | 38.75  | _DVT(ph)PPPETEVLK_         | 2 | 808.913  | 1.14 |
| 394  | IPI00217121 | C19orf21       | 0.85 | 1 | S | 0.025833  | 64.59  | _ALS(ph)SDSILSPAPDAR_      | 2 | 790.372  | 1.19 |
| 26   | IPI00221232 | GNG12          | 1.00 | 1 | S | 0.0368975 | 97.77  | _LEAS(ph)IER_              | 2 | 449.208  | 1.20 |
| 107  | IPI00291738 | TMEM40         | 1.00 | 1 | S | 2.57E-30  | 155.40 | _RGS(ph)DPASGEVEASQLR_     | 2 | 869.891  | 1.21 |
| 32   | IPI00217963 | KRT16          | 0.85 | 1 | S | 3.69E-05  | 100.32 | _IS(ph)SVLAGGSCR_          | 2 | 593.768  | 1.21 |
| 424  | IPI00009771 | LMNB2          | 0.99 | 1 | S | 2.26E-17  | 135.71 | _ATSSSSGS(ph)LSATGR_       | 2 | 674.791  | 1.21 |
| 700  | IPI00183002 | PPP1R12A       | 0.78 | 1 | T | 0.0165204 | 63.90  | _RSTQGVV(ph)LTDLQEAQ_      | 3 | 619.298  | 1.21 |
| 448  | IPI00328293 | SRRM1          | 0.98 | 1 | S | 0.0687976 | 68.46  | _RES(ph)PSPAPKPR_          | 3 | 434.550  | 1.22 |
| 270  | IPI00742743 | TP53BP1        | 1.00 | 1 | S | 0.123293  | 56.31  | _SEDM(ox)PFS(ph)PK_        | 2 | 567.215  | 1.22 |
| 111  | IPI00291738 | TMEM40         | 0.98 | 1 | S | 2.57E-30  | 155.40 | _RGSDPAS(ph)GEVEASQLR_     | 3 | 580.263  | 1.23 |
| 618  | IPI00020984 | CANX           | 1.00 | 1 | S | 5.29E-05  | 93.54  | _AEDEILNRS(ph)PR_          | 2 | 754.841  | 1.23 |
| 245  | IPI00412650 | SVIL           | 0.99 | 1 | S | 0.133651  | 54.65  | _DSSFTEVPRS(ph)PK_         | 2 | 715.322  | 1.25 |
| 184  | IPI00647915 | TAGLN2         | 1.00 | 1 | S | 3.37E-06  | 136.96 | _NFS(ph)DNQLQEGK_          | 2 | 680.282  | 1.25 |
| 572  | IPI00009867 | KRT5           | 0.79 | 1 | S | 0.002111  | 95.97  | _GLGVGFGSGGSS(ph)SSVK_     | 2 | 760.343  | 1.28 |
| 6    | IPI00009867 | KRT5           | 0.87 | 1 | S | 0.161226  | 80.54  | _QSS(ph)VSFR_              | 2 | 445.692  | 1.29 |
| 57   | IPI00186290 | EEF2           | 0.98 | 1 | T | 0.0056232 | 78.54  | _AGETRFT(ph)DTR_           | 2 | 617.267  | 1.29 |
| 71   | IPI00910738 | KRT6B          | 0.77 | 1 | S | 1         | 24.44  | _IS(ph)IGGGSCAISGGYGS_     | 2 | 839.866  | 1.29 |
| 112  | IPI00032206 | PDLIM4         | 0.97 | 1 | S | 3.45E-09  | 121.73 | _IHIDPEIQDGS(ph)PTTSR_     | 3 | 615.951  | 1.31 |
| 93   | IPI00398272 | COL17A1        | 1.00 | 1 | S | 0.002879  | 83.61  | _AHPASTLPNS(ph)PGSTFER_    | 3 | 645.958  | 1.32 |
| 192  | IPI00397381 | EPN2           | 1.00 | 2 | S | 0.0006762 | 88.19  | _AGGS(ph)PAS(ph)YHGSTSPR_  | 2 | 796.301  | 1.34 |
| 195  | IPI00397381 | EPN2           | 0.99 | 2 | S | 0.0006762 | 88.19  | _AGGS(ph)PAS(ph)YHGSTSPR_  | 2 | 796.301  | 1.34 |
| 349  | IPI00014454 | RIN1           | 0.97 | 1 | S | 4.13E-05  | 97.94  | _S(ph)M(ox)SAAFCSLLAPER_   | 2 | 818.349  | 1.34 |
| 574  | IPI00009867 | KRT5           | 0.97 | 1 | S | 0.002111  | 95.97  | _GLGVGFGSGGSSSS(ph)VK_     | 2 | 760.343  | 1.36 |
| 544  | IPI00043622 | FRMD6          | 1.00 | 1 | S | 0.0789022 | 92.16  | _HSL(ph)LDDIR_             | 2 | 568.261  | 1.36 |
| 1069 | IPI00027422 | ITGB4          | 1.00 | 1 | S | 5.29E-05  | 93.54  | _LLELQEVDS(ph)LLR_         | 2 | 754.392  | 1.37 |
| 9    | IPI00796864 | DPM1           | 0.99 | 1 | S | 0.019028  | 84.82  | _acASLEVSRS(ph)PR_         | 2 | 612.293  | 1.40 |
| 52   | IPI00910275 | DKFZp686M21196 | 1.00 | 1 | S | 1.85E-08  | 104.52 | _NLS(ph)STTDDEAPR_         | 2 | 693.283  | 1.41 |
| 93   | IPI00927614 | GOLGA4         | 1.00 | 1 | S | 0.473856  | 59.23  | _VPS(ph)VESLFR_            | 2 | 557.271  | 1.43 |
| 263  | IPI00021058 | SLC4A7         | 0.99 | 1 | S | 6.29E-07  | 110.18 | _NGILASPQS(ph)APGNLNSK_    | 2 | 931.936  | 1.45 |
| 184  | IPI00152685 | TTC15          | 0.97 | 1 | S | 0.0052035 | 108.77 | _SPS(ph)FGGASEASAR_        | 2 | 652.269  | 1.47 |
| 142  | IPI00794221 | DBN1           | 0.99 | 1 | S | 0.487342  | 65.09  | _LSS(ph)PVLHR_             | 2 | 494.752  | 1.51 |
| 429  | IPI00855787 | TNKS1BP1       | 0.96 | 1 | S | 0.0874031 | 47.47  | _RFS(ph)EGVLQSPSQDQEK_     | 3 | 638.958  | 1.53 |
| 9    | IPI00152503 | DTX3L          | 1.00 | 1 | S | 0.0508231 | 59.28  | _acASHLRPPS(ph)PLLVR_      | 2 | 782.922  | 1.54 |
| 571  | IPI00009867 | KRT5           | 0.81 | 1 | S | 0.002111  | 95.97  | _GLGVGFGSGGSS(ph)SSVK_     | 2 | 760.343  | 1.57 |
| 220  | IPI00029834 | RTKN           | 0.99 | 1 | S | 1         | 49.97  | _LSSS(ph)LGR_              | 2 | 400.189  | 1.59 |
| 197  | IPI00005264 | PKP2           | 1.00 | 1 | S | 0.0687976 | 68.46  | _YARS(ph)EIVGVSR_          | 2 | 658.822  | 1.60 |
| 314  | IPI00026952 | PKP3           | 0.89 | 1 | S | 2.61E-09  | 117.38 | _LSS(ph)GFDDIDLPSAVK_      | 2 | 822.382  | 1.65 |
| 257  | IPI00299063 | STIM1          | 1.00 | 1 | S | 3.85E-05  | 112.01 | _AEQS(ph)LHDLQER_          | 2 | 703.309  | 1.69 |

|      |             |          |      |   |   |           |        |                             |   |         |      |
|------|-------------|----------|------|---|---|-----------|--------|-----------------------------|---|---------|------|
| 1494 | IPI00027422 | ITGB4    | 0.99 | 1 | S | 0.874565  | 60.67  | _DYN(ph)LTR_                | 2 | 474.695 | 1.71 |
| 527  | IPI00018098 | PRPF38B  | 0.93 | 2 | S | 1         | 17.48  | _S(ph)QS(ph)IEQESQEK_       | 2 | 726.768 | 1.72 |
| 529  | IPI00018098 | PRPF38B  | 0.92 | 2 | S | 1         | 17.48  | _S(ph)QS(ph)IEQESQEK_       | 2 | 726.768 | 1.72 |
| 563  | IPI00910882 | TBC1D5   | 0.92 | 1 | S | 0.101346  | 51.98  | _NISSSPS(ph)VESLPGGR_       | 2 | 783.862 | 1.74 |
| 2    | IPI00847342 | KRT7     | 1.00 | 1 | S | 0.0554954 | 68.46  | _(ac)S(ph)IHFSSPVFTSR_      | 2 | 743.840 | 1.80 |
| 114  | IPI00006207 | LRRFIP1  | 0.98 | 1 | T | 4.85E-13  | 145.45 | _NM(ox)PGLSAATLASLGGT(ph)SS | 2 | 943.938 | 1.84 |
| 395  | IPI00217121 | C19orf21 | 0.89 | 1 | S | 0.025833  | 64.59  | _R_                         | 2 | 790.372 | 1.93 |
| 40   | IPI00479145 | KRT19    | 1.00 | 1 | S | 0.164547  | 58.94  | _ALSS(ph)DSILSPAPDAR_       | 2 | 538.238 | 2.02 |
| 21   | IPI00419932 | RAB12    | 1.00 | 1 | S | 0.0622308 | 51.91  | _APSIHGGG(ph)GGR_           | 2 | 832.381 | 2.05 |
| 1002 | IPI00640092 | SH3PXD2A | 0.99 | 1 | S | 0.0895344 | 54.65  | _AGGGGGLGAGS(ph)PALSGGQGR   | 2 | 628.780 | 2.07 |
| 11   | IPI00760715 | CAST     | 1.00 | 1 | S | 0.136973  | 47.47  | _NES(ph)LTATDGLR_           | 2 | 533.598 | 2.08 |
| 136  | IPI00071826 | FAM54B   | 1.00 | 1 | S | 0.0361344 | 100.94 | _(ac)SQPGQKPAAS(ph)PRPR_    | 3 | 475.726 | 2.14 |
| 128  | IPI00398272 | COL17A1  | 0.78 | 1 | S | 0.208357  | 49.59  | _NAS(ph)VPNLR_              | 2 | 482.692 | 2.24 |
| 419  | IPI00418471 | VIM      | 0.91 | 1 | S | 0.0021482 | 102.36 | _EFAS(ph)SSTR_              | 2 | 825.934 | 2.35 |
| 1483 | IPI00027422 | ITGB4    | 1.00 | 1 | S | 0.0076441 | 84.82  | _ISLPLPNFS(ph)SLNLR_        | 2 | 572.784 | 2.35 |
| 35   | IPI00479145 | KRT19    | 1.00 | 1 | S | 0.164547  | 58.94  | _VLS(ph)TSSTLTR_            | 2 | 359.161 | 2.40 |
| 123  | IPI00026952 | PKP3     | 1.00 | 1 | S | 0.330581  | 65.09  | _APS(ph)IHGGSGGR_           | 3 | 537.718 | 2.42 |
| 457  | IPI00290110 | PDCD4    | 1.00 | 1 | S | 0.0789022 | 92.16  | _S(ph)AVDLSCSR_             | 2 | 502.198 | 2.56 |
| 543  | IPI00217121 | C19orf21 | 0.95 | 1 | S | 0.0789022 | 92.16  | _FVS(ph)EGDGGR_             | 2 | 557.742 | 2.59 |
| 59   | IPI00186290 | EEF2     | 0.91 | 1 | T | 0.0056232 | 78.54  | _SQS(ph)SDLLER_             | 2 | 752.825 | 2.64 |
| 578  | IPI00385042 | GTPBP4   | 1.00 | 1 | S | 0.109822  | 68.26  | _FTDT(ph)RKDEQER_           | 2 | 363.663 | 2.96 |
| 887  | IPI00396171 | MAP4     | 0.90 | 1 | S | 0.0198305 | 68.46  | _DVS(ph)GLR_                | 2 | 605.789 | 3.01 |
| 269  | IPI00182540 | CTNND1   | 0.99 | 1 | S | 0.0137753 | 74.04  | _LATNTS(ph)APDLK_           | 2 | 553.753 | 3.25 |
| 270  | IPI00306301 | PDHA1    | 1.00 | 1 | S | 0.0117704 | 130.93 | _VGGSS(ph)VDLHR_            | 2 | 548.212 | 3.34 |
|      |             |          |      |   |   |           |        | _YGM(ox)GTS(ph)VER_         | 2 |         |      |

**Supplementary Table 7: Fibroblast cell line.** Cell lysates were prepared from unlabeled (Arg0/Lys0), freshly isolated fibroblasts and labeled (Arg10/Lys8), immortalized fibroblast cell line. Shown are normalized log<sub>2</sub> transformed protein ratios of identified proteins. For identification a minimum of 2 peptides per protein has to be identified (unique + razor). The database used for identification was a decoy database based on IPI v. 3.59 containing in total 160,820 entries. As a criterium for identification the posterior error probability rate of identified proteins (PEP) is shown. The peptide numbers represent peptides used for quantitation.

| Protein ID   | Gene Symbol | Unique + Razor<br>Sequence<br>Coverage [%] | PEP       | Log2 Ratio | Peptide No. | Variability<br>[%] | Quantil |
|--------------|-------------|--------------------------------------------|-----------|------------|-------------|--------------------|---------|
| IPI00218914; | ALDH1A1     | 37.7                                       | 1.55E-179 | -5.678     | 16          | 114.5              | Q1      |
| IPI00871843; | TGM2        | 27.1                                       | 9.12E-141 | -5.076     | 21          | 62.5               | Q1      |
| IPI00022810  | CTSC        | 6.7                                        | 3.80E-15  | -4.794     | 3           | 89.9               | Q1      |
| IPI00847793; | DCD         | 20.7                                       | 3.16E-29  | -4.746     | 4           | 96.8               | Q1      |
| IPI00014852; | PGM5        | 16                                         | 1.88E-49  | -4.251     | 9           | 38.1               | Q1      |
| IPI00554711  | JUP         | 5.1                                        | 9.74E-08  | -4.143     | 2           | 118.2              | Q1      |
| IPI00887461; | HLA-B       | 15.5                                       | 5.05E-70  | -3.842     | 6           | 179.3              | Q1      |
| IPI00607801; | CES1        | 15                                         | 3.06E-24  | -3.830     | 7           | 151.9              | Q1      |
| IPI00293616; | DDX3Y       | 5.5                                        | 4.76E-184 | -3.783     | 3           | 21.0               | Q1      |
| IPI00465084  | DES         | 18.5                                       | 6.64E-49  | -3.710     | 8           | 158.8              | Q1      |
| IPI00009645; | RANBP17     | 1.5                                        | 7.29E-01  | -3.432     | 3           | 156.0              | Q1      |
| IPI00657706; | MBOAT7      | 5.1                                        | 2.42E-08  | -3.350     | 2           | 11.8               | Q1      |
| IPI00220194; | SLC2A1      | 4.9                                        | 7.99E-18  | -3.116     | 6           | 91.4               | Q1      |
| IPI00021692; | MBNL1       | 5.7                                        | 1.03E-05  | -3.098     | 9           | 143.1              | Q1      |
| IPI00877611; | LOC727849   | 12.8                                       | 1.20E-01  | -3.097     | 2           | 45.3               | Q1      |
| IPI00336081; | MYLK        | 28.7                                       | 1.87E-193 | -3.066     | 68          | 37.5               | Q1      |
| IPI00554788; | KRT18       | 11.9                                       | 2.83E-39  | -3.001     | 9           | 99.3               | Q1      |
| IPI00014398; | FHL1        | 27.2                                       | 1.30E-63  | -2.995     | 9           | 34.8               | Q1      |
| IPI00020632; | ASS1        | 12.9                                       | 3.23E-39  | -2.867     | 10          | 89.1               | Q1      |
| IPI00414008; | LMOD1       | 17.6                                       | 9.93E-51  | -2.792     | 12          | 39.5               | Q1      |
| IPI00297646; | COL1A1      | 44.1                                       | 1.74E-298 | -2.736     | 84          | 192.9              | Q1      |
| IPI00299738; | PCOLCE      | 7.8                                        | 1.04E-07  | -2.551     | 3           | 23.3               | Q1      |
| IPI00554538; | TPP1        | 13.2                                       | 1.73E-133 | -2.471     | 4           | 23.5               | Q1      |
| IPI00012069; | NQO1        | 31.8                                       | 7.70E-47  | -2.413     | 14          | 16.4               | Q1      |



|              |         |      |           |        |    |       |    |
|--------------|---------|------|-----------|--------|----|-------|----|
| IPI00742968; | HLA-A   | 12.6 | 1.77E-109 | -2.404 | 4  | 115.2 | Q1 |
| IPI00218487; | GJA1    | 6    | 1.95E-03  | -2.333 | 2  | 19.5  | Q1 |
| IPI00021458  | EHD3    | 7.1  | 9.45E-60  | -2.326 | 2  | 1.7   | Q1 |
| IPI00021264  | CNN1    | 38.7 | 2.48E-75  | -2.295 | 14 | 11.2  | Q1 |
| IPI00847342; | KRT7    | 7.2  | 2.41E-31  | -2.267 | 3  | 25.1  | Q1 |
| IPI00900324; | SYNPO2  | 8.6  | 1.46E-12  | -2.257 | 10 | 23.8  | Q1 |
| IPI00847322; | SOD2    | 34.2 | 1.32E-86  | -2.250 | 12 | 8.7   | Q1 |
| IPI00658152; | TNS3    | 8.5  | 6.43E-140 | -2.202 | 8  | 19.1  | Q1 |
| IPI00300599; | CTSK    | 40.7 | 4.26E-48  | -2.150 | 23 | 57.1  | Q1 |
| IPI00247063  | MME     | 41.3 | <1.0E-304 | -2.084 | 64 | 49.2  | Q1 |
| IPI00001580; | FYCO1   | 15.2 | 5.64E-134 | -2.081 | 20 | 47.4  | Q1 |
| IPI00298292; | PTK7    | 14.6 | 3.86E-112 | -2.051 | 21 | 58.5  | Q1 |
| IPI00296099; | THBS1   | 26.1 | 7.46E-238 | -2.016 | 70 | 64.1  | Q1 |
| IPI00060423; | CTHRC1  | 17.7 | 6.98E-22  | -2.015 | 4  | 8.8   | Q1 |
| IPI00873137; | COL1A2  | 28.6 | 4.46E-230 | -2.012 | 58 | 177.1 | Q1 |
| IPI00746455; | FARP1   | 12.2 | 2.29E-38  | -1.970 | 11 | 9.9   | Q1 |
| IPI00021033; | COL3A1  | 11.5 | 9.64E-76  | -1.958 | 16 | 79.6  | Q1 |
| IPI00021695; | ATP2B1  | 9.7  | 2.53E-245 | -1.953 | 9  | 70.7  | Q1 |
| IPI00016915  | IGFBP7  | 12.4 | 4.68E-04  | -1.949 | 2  | 32.4  | Q1 |
| IPI00045219; | SNX18   | 10.5 | 7.86E-34  | -1.940 | 10 | 30.9  | Q1 |
| IPI00550239  | H1FO    | 11.9 | 3.94E-26  | -1.880 | 2  | 121.9 | Q1 |
| IPI00026314; | GSN     | 39.4 | <1.0E-304 | -1.872 | 55 | 66.0  | Q1 |
| IPI00329573; | COL12A1 | 29.2 | <1.0E-304 | -1.869 | 80 | 45.2  | Q1 |
| IPI00914866; | AOX1    | 2.8  | 1.23E-11  | -1.861 | 3  | 61.1  | Q1 |
| IPI00001734; | PSAT1   | 29.6 | 3.91E-42  | -1.837 | 13 | 11.4  | Q1 |
| IPI00856116; | PALLD   | 19.9 | 1.96E-121 | -1.808 | 28 | 16.4  | Q1 |
| IPI00639805; | GSTM2   | 30   | 3.35E-93  | -1.778 | 5  | 79.8  | Q1 |
| IPI00004363  | STK39   | 4.4  | 1.94E-31  | -1.772 | 3  | 19.6  | Q1 |
| IPI00019988; | SGSH    | 19.5 | 2.55E-53  | -1.746 | 10 | 68.5  | Q1 |
| IPI00296713; | GRN     | 6.4  | 5.39E-05  | -1.731 | 3  | 13.7  | Q1 |
| IPI00011229; | CTSD    | 33   | 1.05E-199 | -1.720 | 29 | 35.3  | Q1 |
| IPI00295400; | WARS    | 24.8 | 8.25E-90  | -1.697 | 9  | 10.1  | Q1 |
| IPI00304577; | AP2A1   | 25.7 | 4.40E-174 | -1.686 | 43 | 144.3 | Q1 |

|              |          |      |           |        |    |       |    |
|--------------|----------|------|-----------|--------|----|-------|----|
| IPI00008603; | ACTA2    | 37.4 | 3.14E-280 | -1.678 | 24 | 112.0 | Q1 |
| IPI00008787; | NAGLU    | 3.9  | 1.33E-04  | -1.666 | 3  | 5.9   | Q1 |
| IPI00293088; | GAA      | 5.7  | 1.82E-26  | -1.659 | 8  | 65.1  | Q1 |
| IPI00237884; | AKAP12   | 24.1 | <1.0E-304 | -1.620 | 39 | 48.0  | Q1 |
| IPI00008494; | ICAM1    | 7.7  | 4.03E-21  | -1.615 | 6  | 21.1  | Q1 |
| IPI00418446; | ASAH1    | 7.3  | 4.75E-04  | -1.609 | 3  | 21.9  | Q1 |
| IPI00027851; | HEXA     | 17.8 | 1.21E-62  | -1.609 | 9  | 62.5  | Q1 |
| IPI00640525; | PPGB     | 15.1 | 1.26E-52  | -1.596 | 7  | 9.5   | Q1 |
| IPI00011200; | PHGDH    | 20.1 | 1.09E-51  | -1.592 | 7  | 10.3  | Q1 |
| IPI00878985; | INF2     | 17.5 | 1.70E-200 | -1.545 | 23 | 76.1  | Q1 |
| IPI00218729; | DLG1     | 4    | 5.45E-11  | -1.541 | 3  | 12.1  | Q1 |
| IPI00006666; | SLC16A3  | 4.5  | 1.18E-02  | -1.523 | 2  | 6.4   | Q1 |
| IPI00015944; | EML2     | 4.7  | 2.42E-05  | -1.508 | 3  | 13.2  | Q1 |
| IPI00025160; | VAC14    | 8.2  | 3.09E-21  | -1.489 | 7  | 13.2  | Q1 |
| IPI00219129; | NQO2     | 11.7 | 2.75E-76  | -1.487 | 2  | 1.1   | Q1 |
| IPI00012426; | SCPEP1   | 9.1  | 1.12E-22  | -1.480 | 5  | 81.8  | Q1 |
| IPI00298308; | ALDH1L2  | 17.1 | 1.08E-120 | -1.441 | 15 | 6.8   | Q1 |
| IPI00020539; | PGPEP1   | 7.7  | 2.20E-08  | -1.439 | 2  | 15.6  | Q1 |
| IPI00796919; | GLB1     | 17.8 | 1.33E-87  | -1.437 | 14 | 6.1   | Q1 |
| IPI00295741; | CTSB     | 39.8 | 7.80E-271 | -1.422 | 27 | 20.6  | Q1 |
| IPI00219684  | FABP3    | 53.4 | 1.08E-47  | -1.403 | 8  | 66.0  | Q1 |
| IPI00332106; | PBXIP1   | 10.7 | 5.81E-61  | -1.384 | 6  | 13.2  | Q1 |
| IPI00012585  | HEXB     | 21.8 | 2.45E-77  | -1.383 | 16 | 47.1  | Q1 |
| IPI00376689; | KIAA1199 | 10.4 | 4.03E-35  | -1.377 | 13 | 15.3  | Q1 |
| IPI00010348; | DNASE2   | 5.3  | 1.23E-01  | -1.373 | 2  | 21.9  | Q1 |
| IPI00797038; | PCK2     | 26.4 | 1.01E-159 | -1.371 | 14 | 10.6  | Q1 |
| IPI00884896; | TXNRD1   | 22   | 3.01E-91  | -1.362 | 14 | 27.6  | Q1 |
| IPI00796934; | RPL29    | 14.5 | 4.53E-12  | -1.358 | 2  | 22.4  | Q1 |
| IPI00023704; | LPP      | 17.3 | 3.77E-53  | -1.351 | 9  | 32.4  | Q1 |
| IPI00479912; | PXK      | 2.8  | 1.31E-21  | -1.343 | 2  | 29.5  | Q1 |
| IPI00889740; | FBLN1    | 2.8  | 9.24E-04  | -1.336 | 2  | 2.9   | Q1 |
| IPI00074870  | DNAJC1   | 3.4  | 6.75E-13  | -1.333 | 2  | 160.8 | Q1 |
| IPI00019472; | SLC1A5   | 16.5 | 3.50E-63  | -1.313 | 9  | 26.1  | Q1 |

|              |         |      |           |        |    |      |    |
|--------------|---------|------|-----------|--------|----|------|----|
| IPI00027078; | CPD     | 5.8  | 5.39E-10  | -1.309 | 9  | 36.9 | Q1 |
| IPI00745313; | AEBP1   | 4.1  | 9.15E-13  | -1.305 | 4  | 25.4 | Q1 |
| IPI00927606; | GPX1    | 24.1 | 5.81E-14  | -1.275 | 5  | 34.4 | Q1 |
| IPI00218682; | P4HA1   | 34.6 | 5.08E-178 | -1.272 | 21 | 12.1 | Q1 |
| IPI00554481; | SLC3A2  | 19.4 | 2.84E-64  | -1.268 | 16 | 19.7 | Q1 |
| IPI00384280; | PCYOX1  | 16.2 | 3.04E-17  | -1.264 | 9  | 53.3 | Q1 |
| IPI00794169; | ANO10   | 3.3  | 3.27E-17  | -1.234 | 2  | 11.1 | Q1 |
| IPI00298267; | PTGS1   | 9.2  | 5.70E-04  | -1.223 | 6  | 11.6 | Q1 |
| IPI00006675; | ABCC4   | 1.6  | 3.81E-04  | -1.218 | 3  | 37.9 | Q1 |
| IPI00465436  | CAT     | 32.6 | 3.61E-127 | -1.217 | 16 | 19.6 | Q1 |
| IPI00180404; | NEXN    | 9.6  | 1.93E-15  | -1.206 | 9  | 6.9  | Q1 |
| IPI00008215  | ME1     | 11.9 | 7.36E-32  | -1.189 | 6  | 4.2  | Q1 |
| IPI00418382; | OPLAH   | 3.5  | 1.36E-35  | -1.154 | 4  | 5.4  | Q1 |
| IPI00101186; | RRP12   | 3.9  | 7.90E-45  | -1.150 | 7  | 98.8 | Q1 |
| IPI00182373; | P4HA2   | 41.8 | <1.0E-304 | -1.144 | 25 | 13.0 | Q1 |
| IPI00003766  | ETHE1   | 20.1 | 8.76E-63  | -1.140 | 5  | 59.3 | Q1 |
| IPI00002824; | CSRP2   | 43.5 | 1.22E-33  | -1.133 | 8  | 9.3  | Q1 |
| IPI00399307; | PRCP    | 21.5 | 2.72E-75  | -1.131 | 11 | 10.7 | Q1 |
| IPI00643920; | TKT     | 49.1 | <1.0E-304 | -1.110 | 75 | 24.8 | Q1 |
| IPI00328243; | PLD3    | 3.9  | 3.25E-07  | -1.108 | 4  | 8.3  | Q1 |
| IPI00909417; | IFI16   | 15.8 | 7.17E-56  | -1.098 | 10 | 19.8 | Q1 |
| IPI00748567; | LIPA    | 8.2  | 8.43E-07  | -1.093 | 4  | 28.9 | Q1 |
| IPI00333010; | CHERP   | 2.4  | 1.42E-09  | -1.092 | 2  | 14.3 | Q1 |
| IPI00550440; | C2orf18 | 3.2  | 2.65E-02  | -1.083 | 2  | 13.7 | Q1 |
| IPI00908404; | GNS     | 15.1 | 2.37E-66  | -1.078 | 13 | 14.0 | Q1 |
| IPI00385449; | PRKCA   | 13.4 | 8.55E-25  | -1.075 | 7  | 8.8  | Q1 |
| IPI00005107; | NPC1    | 9.6  | 2.57E-91  | -1.075 | 18 | 31.5 | Q1 |
| IPI00007058; | CORO1B  | 12.7 | 1.69E-20  | -1.071 | 4  | 11.4 | Q1 |
| IPI00169285  | PLBD2   | 8.7  | 5.18E-16  | -1.066 | 7  | 30.4 | Q1 |
| IPI00165949; | ERAP1   | 13.6 | 1.89E-54  | -1.066 | 13 | 6.2  | Q1 |
| IPI00220709; | TPM2    | 37   | 5.15E-159 | -1.065 | 16 | 19.9 | Q1 |
| IPI00472160; | ARHGEF2 | 15.3 | 8.19E-115 | -1.065 | 15 | 9.1  | Q1 |
| IPI00917081; | ANO6    | 1.3  | 6.41E-02  | -1.059 | 2  | 13.7 | Q1 |

|              |               |      |           |        |    |       |    |
|--------------|---------------|------|-----------|--------|----|-------|----|
| IPI00007722; | AMPD2         | 4.2  | 7.13E-05  | -1.041 | 5  | 188.0 | Q1 |
| IPI00333771; | CALD1         | 64.3 | <1.0E-304 | -1.037 | 81 | 47.8  | Q1 |
| IPI00477611; | COL5A1        | 1.6  | 3.03E-11  | -1.034 | 3  | 21.8  | Q1 |
| IPI00219682; | STOM          | 42   | 1.94E-188 | -1.032 | 24 | 13.0  | Q1 |
| IPI00019178; | PSPH          | 8.9  | 9.93E-07  | -1.029 | 2  | 8.6   | Q1 |
| IPI00001437; | RND3          | 5.3  | 4.99E-03  | -1.024 | 2  | 13.2  | Q1 |
| IPI00871240; | DKFZp434J2412 | 3.9  | 6.25E-30  | -1.019 | 3  | 38.4  | Q1 |
| IPI00102685; | MYADM         | 10.2 | 8.02E-28  | -1.015 | 10 | 94.7  | Q1 |
| IPI00060200; | GALM          | 6.1  | 2.46E-02  | -1.013 | 2  | 159.3 | Q1 |
| IPI00647389; | EPN1          | 3.5  | 4.19E-71  | -1.004 | 2  | 8.7   | Q1 |
| IPI00179713; | IGF2BP2       | 36.2 | 5.34E-157 | -1.000 | 31 | 12.7  | Q1 |
| IPI00296461; | SMPD1         | 4    | 1.48E-12  | -0.995 | 2  | 11.7  | Q1 |
| IPI00816771; | WASH1         | 15   | 2.87E-25  | -0.983 | 6  | 68.0  | Q1 |
| IPI00743104  | ITGA1         | 3.9  | 3.65E-02  | -0.982 | 5  | 23.3  | Q1 |
| IPI00020418  | RRAS          | 21.1 | 4.73E-93  | -0.980 | 8  | 10.0  | Q1 |
| IPI00376976; | ASAP1         | 6.3  | 2.41E-13  | -0.977 | 5  | 29.9  | Q1 |
| IPI00009111  | TPBG          | 6.9  | 9.19E-10  | -0.975 | 3  | 23.5  | Q1 |
| IPI00657752; | CD81          | 21.5 | 1.36E-61  | -0.971 | 5  | 10.7  | Q1 |
| IPI00719178; | ABCC1         | 3    | 5.18E-10  | -0.970 | 5  | 8.0   | Q1 |
| IPI00216008; | G6PD          | 29.8 | 1.74E-69  | -0.966 | 19 | 8.0   | Q1 |
| IPI00083708; | BAT2D1        | 1.1  | 2.37E-11  | -0.963 | 4  | 10.1  | Q1 |
| IPI00873452; | LMCD1         | 5.4  | 6.86E-14  | -0.957 | 3  | 54.8  | Q1 |
| IPI00103471  | SELM          | 20.7 | 5.31E-05  | -0.952 | 2  | 13.3  | Q1 |
| IPI00641181  | MARCKSL1      | 14.4 | 1.20E-20  | -0.945 | 2  | 23.7  | Q1 |
| IPI00218624; | SON           | 4.5  | 1.42E-15  | -0.945 | 8  | 98.3  | Q1 |
| IPI00216138; | TAGLN         | 77.1 | 2.73E-138 | -0.944 | 60 | 16.2  | Q1 |
| IPI00549564; | ACSS2         | 3.5  | 7.73E-09  | -0.939 | 3  | 8.4   | Q1 |
| IPI00007074  | YARS          | 43.2 | 2.89E-56  | -0.936 | 26 | 8.3   | Q1 |
| IPI00386114; | SF1           | 13.8 | 1.95E-25  | -0.935 | 10 | 37.4  | Q1 |
| IPI00023122; | PDLIM7        | 15.1 | 9.79E-24  | -0.926 | 8  | 116.7 | Q1 |
| IPI00643818  | C1orf55       | 2.8  | 6.26E-02  | -0.924 | 2  | 18.9  | Q1 |
| IPI00644697; | HEBP2         | 39.3 | 8.39E-97  | -0.923 | 7  | 5.4   | Q1 |
| IPI00012490; | ATP2B4        | 29.2 | <1.0E-304 | -0.922 | 54 | 48.0  | Q1 |

|              |              |      |           |        |    |       |    |
|--------------|--------------|------|-----------|--------|----|-------|----|
| IPI00657692; | COL4A3BP     | 1.2  | 2.35E-02  | -0.912 | 2  | 0.9   | Q1 |
| IPI00291607; | ITPR3        | 2.2  | 4.28E-17  | -0.912 | 6  | 117.9 | Q1 |
| IPI00792065; | TOR1AIP1     | 6.7  | 1.67E-30  | -0.909 | 4  | 31.7  | Q1 |
| IPI00021807; | GBA          | 22.9 | 3.02E-73  | -0.909 | 18 | 22.8  | Q1 |
| IPI00157757; | MICAL1       | 16.2 | 2.52E-141 | -0.909 | 17 | 7.8   | Q1 |
| IPI00465431  | LGALS3       | 36.8 | 1.01E-63  | -0.907 | 23 | 106.2 | Q1 |
| IPI00182126; | FKBP9        | 29.8 | 4.28E-104 | -0.906 | 27 | 36.0  | Q1 |
| IPI00332493; | PLEKHO2      | 13.3 | 2.83E-60  | -0.901 | 7  | 13.2  | Q1 |
| IPI00829927; | ARMC9        | 5    | 1.24E-57  | -0.898 | 6  | 37.5  | Q1 |
| IPI00298281  | LAMC1        | 11.5 | 5.75E-184 | -0.897 | 17 | 9.4   | Q1 |
| IPI00294834; | ASPH         | 31   | 3.17E-175 | -0.896 | 36 | 13.8  | Q1 |
| IPI00795979; | FLOT2        | 6.8  | 3.06E-13  | -0.895 | 3  | 39.5  | Q1 |
| IPI00217442; | hCG_2045902  | 0.8  | 2.25E-18  | -0.895 | 2  | 57.6  | Q1 |
| IPI00329482; | LAMA4        | 2.3  | 3.73E-06  | -0.894 | 4  | 7.9   | Q1 |
| IPI00917650; | FAM38A       | 2    | 1.07E-08  | -0.889 | 3  | 69.4  | Q1 |
| IPI00010779; | TPM4         | 78.6 | 2.57E-256 | -0.888 | 71 | 38.6  | Q1 |
| IPI00010779; | TPM4         | 78.6 | 2.57E-256 | -0.888 | 71 | 38.6  | Q1 |
| IPI00784808; | Ov/Br septin | 33.7 | 4.72E-167 | -0.884 | 34 | 50.7  | Q1 |
| IPI00014399  | FHL3         | 9.6  | 1.29E-09  | -0.878 | 3  | 9.8   | Q1 |
| IPI00296922; | LAMB2        | 9.5  | 9.85E-105 | -0.876 | 14 | 17.1  | Q1 |
| IPI00300697; | VPS11        | 1.9  | 8.48E-05  | -0.865 | 2  | 3.0   | Q1 |
| IPI00383046  | CMBL         | 8.2  | 9.71E-03  | -0.863 | 2  | 3.6   | Q1 |
| IPI00894409; | CPNE1        | 20.3 | 1.16E-92  | -0.860 | 12 | 11.8  | Q1 |
| IPI00022892; | THY1         | 24.8 | 2.88E-93  | -0.853 | 12 | 50.3  | Q1 |
| IPI00908913; | hCG_2043421  | 20.5 | 1.06E-13  | -0.851 | 3  | 7.6   | Q1 |
| IPI00292953; | RAI14        | 32.6 | 3.69E-254 | -0.851 | 39 | 27.8  | Q1 |
| IPI00018311; | NPTN         | 7    | 3.51E-15  | -0.851 | 3  | 41.0  | Q1 |
| IPI00479385; | ASMTL        | 3.1  | 2.08E-12  | -0.849 | 2  | 4.0   | Q1 |
| IPI00021924  | H1FX         | 26.3 | 7.13E-57  | -0.847 | 5  | 13.0  | Q1 |
| IPI00783313; | PYGL         | 21.8 | 4.11E-134 | -0.841 | 18 | 9.2   | Q1 |
| IPI00011932  | HSPA12A      | 4.4  | 2.91E-08  | -0.841 | 2  | 17.3  | Q1 |
| IPI00923582; | SCRN1        | 6    | 2.45E-17  | -0.838 | 4  | 6.1   | Q1 |
| IPI00018873; | NAMPT        | 12.6 | 3.53E-49  | -0.835 | 6  | 27.1  | Q1 |

|              |               |      |           |        |     |      |    |
|--------------|---------------|------|-----------|--------|-----|------|----|
| IPI00009896  | EPHX1         | 9.5  | 6.93E-06  | -0.835 | 4   | 3.4  | Q1 |
| IPI00219249  | CNTNAP1       | 10.3 | 1.04E-103 | -0.831 | 13  | 20.0 | Q1 |
| IPI00419250; | GSTT2         | 25.8 | 1.92E-27  | -0.829 | 6   | 23.7 | Q1 |
| IPI00913848; | FERMT2        | 40.2 | 5.89E-265 | -0.829 | 31  | 23.3 | Q1 |
| IPI00257508  | DPYSL2        | 69.1 | <1.0E-304 | -0.818 | 44  | 14.8 | Q1 |
| IPI00217871; | ALDH4A1       | 18.1 | 2.44E-75  | -0.817 | 9   | 8.1  | Q1 |
| IPI00450855; | HMGA1         | 29   | 4.77E-05  | -0.814 | 2   | 4.4  | Q1 |
| IPI00470674; | CYB5R1        | 10.5 | 7.86E-06  | -0.812 | 3   | 43.3 | Q1 |
| IPI00027443; | DKFZp686F1612 | 18.3 | 6.89E-63  | -0.812 | 21  | 11.2 | Q1 |
| IPI00016346; | PROSC         | 19.3 | 3.05E-59  | -0.804 | 4   | 12.8 | Q1 |
| IPI00910593; | CNN2          | 45.5 | 5.42E-145 | -0.803 | 22  | 35.2 | Q1 |
| IPI00166044  | RPTOR         | 2.3  | 3.36E-03  | -0.802 | 2   | 8.3  | Q1 |
| IPI00465377; | MXRA7         | 5.4  | 1.64E-02  | -0.789 | 2   | 9.0  | Q1 |
| IPI00027223; | IDH1          | 13.5 | 1.30E-52  | -0.785 | 7   | 19.7 | Q1 |
| IPI00303300; | FKBP10        | 41.2 | 4.50E-172 | -0.785 | 55  | 25.6 | Q1 |
| IPI00438286; | ERBB2IP       | 6.3  | 2.11E-23  | -0.785 | 8   | 22.6 | Q1 |
| IPI00307162; | VCL           | 65.8 | <1.0E-304 | -0.783 | 146 | 62.8 | Q1 |
| IPI00442073; | CSRP1         | 42   | 8.23E-36  | -0.774 | 11  | 21.5 | Q1 |
| IPI00027681  | NNMT          | 30.7 | 1.25E-82  | -0.769 | 13  | 97.2 | Q1 |
| IPI00288947; | GNAQ          | 13.1 | 1.97E-109 | -0.766 | 4   | 5.4  | Q1 |
| IPI00020513; | ZYX           | 39.9 | 8.17E-162 | -0.765 | 22  | 54.9 | Q1 |
| IPI00396231; | AER61         | 8.2  | 4.69E-08  | -0.764 | 4   | 8.5  | Q1 |
| IPI00253036; | CD99          | 13   | 1.52E-03  | -0.758 | 6   | 65.8 | Q1 |
| IPI00760962; | KANK2         | 17.3 | 1.51E-99  | -0.754 | 31  | 28.4 | Q1 |
| IPI00289819; | IGF2R         | 6.5  | 3.62E-49  | -0.745 | 17  | 16.6 | Q1 |
| IPI00010414  | PDLIM1        | 31   | 1.30E-91  | -0.733 | 9   | 5.8  | Q1 |
| IPI00031697; | TMEM109       | 9.1  | 1.72E-03  | -0.732 | 3   | 38.5 | Q1 |
| IPI00829992; | MYO1C         | 46.5 | <1.0E-304 | -0.731 | 73  | 51.8 | Q1 |
| IPI00034006; | PTPN23        | 14.1 | 7.36E-107 | -0.723 | 19  | 37.8 | Q1 |
| IPI00166010; | CNOT1         | 6.1  | 6.98E-68  | -0.722 | 15  | 19.4 | Q1 |
| IPI00018769; | THBS2         | 4.4  | 1.98E-17  | -0.721 | 4   | 5.7  | Q1 |
| IPI00018087; | C17orf68      | 1.1  | 1.00E+00  | -0.719 | 2   | 0.0  | Q1 |
| IPI00218019; | BSG           | 13.2 | 3.05E-45  | -0.718 | 4   | 23.0 | Q1 |

|              |          |      |           |        |    |       |    |
|--------------|----------|------|-----------|--------|----|-------|----|
| IPI00018783; | ITPA     | 13.4 | 1.05E-02  | -0.717 | 3  | 4.6   | Q1 |
| IPI00031410  | FRAP1    | 1.1  | 5.17E-17  | -0.707 | 2  | 22.7  | Q1 |
| IPI00027442; | AARS     | 36.8 | <1.0E-304 | -0.706 | 84 | 23.4  | Q1 |
| IPI00306661  | KCMF1    | 8.1  | 2.79E-18  | -0.705 | 3  | 6.1   | Q1 |
| IPI00011676  | WASL     | 11.1 | 1.35E-06  | -0.704 | 5  | 7.6   | Q1 |
| IPI00909642; | FLNA     | 0.6  | <1.0E-304 | -0.700 | 3  | 120.4 | Q1 |
| IPI00008418; | DIABLO   | 7    | 1.64E-02  | -0.698 | 2  | 26.4  | Q1 |
| IPI00465028; | TPI1     | 67.8 | <1.0E-304 | -0.697 | 32 | 13.1  | Q1 |
| IPI00790503; | MYH10    | 40.6 | <1.0E-304 | -0.692 | 95 | 18.4  | Q1 |
| IPI00760554; | HLA-A    | 31.8 | 9.31E-134 | -0.689 | 12 | 41.0  | Q1 |
| IPI00607861  | H6PD     | 7.1  | 3.38E-12  | -0.685 | 7  | 30.8  | Q1 |
| IPI00020719  | MAVS     | 6.9  | 1.54E-03  | -0.684 | 2  | 2.7   | Q1 |
| IPI00001730; | FHOD1    | 2    | 8.49E-16  | -0.683 | 2  | 11.2  | Q1 |
| IPI00855787; | TNKS1BP1 | 20.1 | 2.56E-251 | -0.679 | 29 | 43.7  | Q1 |
| IPI00220906; | ACOT2    | 10.4 | 1.25E-25  | -0.678 | 3  | 5.6   | Q1 |
| IPI00302647; | CC2D1A   | 4.3  | 5.01E-09  | -0.676 | 3  | 10.5  | Q1 |
| IPI00554777; | ASNS     | 17.5 | 1.43E-141 | -0.673 | 10 | 6.2   | Q1 |
| IPI00307749; | NDUFS7   | 6.4  | 1.64E-04  | -0.665 | 2  | 39.7  | Q1 |
| IPI00008485; | ACO1     | 19.9 | 3.00E-226 | -0.665 | 19 | 8.3   | Q1 |
| IPI00872808; | DOCK1    | 3.8  | 1.91E-32  | -0.664 | 7  | 11.4  | Q1 |
| IPI00003807; | ACP2     | 4.3  | 4.79E-19  | -0.658 | 2  | 13.3  | Q1 |
| IPI00000105; | MVP      | 58.3 | <1.0E-304 | -0.657 | 90 | 22.6  | Q1 |
| IPI00027350; | PRDX2    | 25.3 | 2.82E-23  | -0.656 | 9  | 18.8  | Q1 |
| IPI00296635; | GBE1     | 34.9 | 5.44E-72  | -0.655 | 47 | 95.7  | Q1 |
| IPI00385495; | LMF2     | 8.8  | 1.51E-40  | -0.652 | 6  | 25.1  | Q1 |
| IPI00179298; | HUWE1    | 6.7  | 1.75E-198 | -0.651 | 30 | 75.5  | Q1 |
| IPI00220278; | MYL9     | 51.2 | 3.68E-123 | -0.650 | 17 | 32.2  | Q1 |
| IPI00016702; | RABGAP1  | 7.3  | 1.21E-50  | -0.650 | 9  | 26.1  | Q1 |
| IPI00000760; | DDAH2    | 36.5 | 4.36E-224 | -0.644 | 9  | 14.7  | Q1 |
| IPI00021338; | DLAT     | 13.3 | 1.87E-33  | -0.641 | 15 | 64.5  | Q1 |
| IPI00903328; | AGFG1    | 4.3  | 1.10E-03  | -0.640 | 2  | 13.7  | Q1 |
| IPI00298851  | CD151    | 7.1  | 5.31E-02  | -0.638 | 3  | 79.2  | Q1 |
| IPI00011284; | COMT     | 31   | 7.90E-81  | -0.637 | 8  | 6.2   | Q1 |

|              |         |      |           |        |    |      |    |
|--------------|---------|------|-----------|--------|----|------|----|
| IPI00187011  | ZC3H4   | 1.2  | 1.12E-02  | -0.632 | 2  | 6.8  | Q1 |
| IPI00551024; | DAK     | 8.7  | 2.68E-19  | -0.628 | 4  | 6.1  | Q1 |
| IPI00658023; | PTPN11  | 15.4 | 7.31E-37  | -0.623 | 7  | 3.7  | Q1 |
| IPI00011416; | ECH1    | 13.1 | 1.06E-61  | -0.621 | 5  | 5.9  | Q1 |
| IPI00294159; | SLC25A1 | 28.9 | 1.79E-34  | -0.621 | 10 | 9.4  | Q1 |
| IPI00219774; | PRKAR2A | 9.4  | 7.47E-09  | -0.615 | 3  | 14.3 | Q1 |
| IPI00216298; | TXN     | 42.9 | 2.07E-58  | -0.614 | 9  | 6.4  | Q1 |
| IPI00012512; | RRAS2   | 11.4 | 1.90E-77  | -0.613 | 3  | 7.2  | Q1 |
| IPI00301579  | NPC2    | 28.9 | 3.58E-27  | -0.611 | 5  | 36.9 | Q1 |
| IPI00797738; | COX6B1  | 31.1 | 1.39E-14  | -0.609 | 3  | 7.5  | Q1 |
| IPI00216172; | LAMP2   | 9.2  | 7.53E-23  | -0.606 | 16 | 27.8 | Q1 |
| IPI00009634; | SQRDL   | 8.2  | 5.11E-24  | -0.605 | 3  | 2.3  | Q1 |
| IPI00413784; | SEPN1   | 3.1  | 1.08E-10  | -0.604 | 2  | 7.7  | Q1 |
| IPI00333143; | DGKA    | 5.6  | 3.29E-23  | -0.604 | 3  | 1.1  | Q1 |
| IPI00013860; | HIBADH  | 24.7 | 2.24E-94  | -0.601 | 7  | 11.2 | Q1 |
| IPI00328867; | SRC     | 4.2  | 1.13E-30  | -0.600 | 2  | 6.1  | Q1 |
| IPI00023974; | PTTG1IP | 16.7 | 2.69E-48  | -0.598 | 2  | 20.5 | Q1 |
| IPI00306719; | CHID1   | 4.6  | 3.02E-19  | -0.596 | 2  | 3.3  | Q1 |
| IPI00386803; | LASP1   | 23.8 | 9.79E-47  | -0.594 | 13 | 41.4 | Q1 |
| IPI00023532; | SPATS2L | 6    | 7.17E-09  | -0.593 | 3  | 10.1 | Q1 |
| IPI00176193; | COL14A1 | 2.3  | 1.40E-05  | -0.593 | 3  | 90.3 | Q1 |
| IPI00001883; | SNX9    | 25.2 | 3.97E-67  | -0.592 | 16 | 8.1  | Q1 |
| IPI00063784; | VTI1B   | 18.1 | 3.11E-05  | -0.591 | 3  | 15.5 | Q1 |
| IPI00018963; | PARVA   | 17.7 | 8.73E-112 | -0.590 | 6  | 41.4 | Q1 |
| IPI00215997; | CD9     | 4.4  | 6.26E-02  | -0.588 | 2  | 9.2  | Q1 |
| IPI00410287; | PRKAA1  | 4.9  | 2.14E-04  | -0.586 | 3  | 20.2 | Q1 |
| IPI00296485  | MAP1S   | 8.4  | 4.40E-27  | -0.585 | 7  | 20.6 | Q1 |
| IPI00009901  | NUTF2   | 37.8 | 2.99E-41  | -0.585 | 5  | 2.9  | Q1 |
| IPI00219825; | PSAP    | 11.6 | 7.35E-47  | -0.584 | 9  | 59.7 | Q1 |
| IPI00102864; | HK2     | 4.9  | 1.29E-68  | -0.582 | 3  | 12.1 | Q1 |
| IPI00012828; | ACAA1   | 7.5  | 2.30E-08  | -0.582 | 3  | 14.5 | Q1 |
| IPI00299468; | SCD     | 5.3  | 5.65E-16  | -0.581 | 2  | 20.2 | Q1 |
| IPI00787089; | PELP1   | 3.3  | 5.25E-19  | -0.580 | 6  | 11.5 | Q1 |



|              |          |      |           |        |     |       |    |
|--------------|----------|------|-----------|--------|-----|-------|----|
| IPI00473014; | DSTN     | 40.6 | 2.04E-30  | -0.580 | 7   | 12.3  | Q1 |
| IPI00008164  | PREP     | 14.4 | 4.48E-207 | -0.573 | 9   | 4.5   | Q1 |
| IPI00386448; | RELA     | 8.2  | 1.98E-27  | -0.570 | 4   | 7.4   | Q1 |
| IPI00003817; | ARHGDI3  | 7.5  | 1.67E-26  | -0.570 | 3   | 8.5   | Q1 |
| IPI00873410; | CNN3     | 31.4 | 1.27E-172 | -0.569 | 17  | 13.9  | Q1 |
| IPI00759776; | ACTN1    | 49.7 | <1.0E-304 | -0.567 | 112 | 22.1  | Q1 |
| IPI00030877  | 40436    | 23   | 9.58E-31  | -0.566 | 3   | 4.8   | Q1 |
| IPI00260090; | ELMO2    | 5.3  | 1.02E-03  | -0.565 | 3   | 1.5   | Q1 |
| IPI00916402; | AAK1     | 3.6  | 2.38E-06  | -0.563 | 2   | 2.3   | Q1 |
| IPI00647286; | C9orf88  | 35.9 | 1.68E-174 | -0.559 | 47  | 114.2 | Q1 |
| IPI00796366; | MYL6     | 37.4 | 2.57E-137 | -0.557 | 14  | 5.2   | Q1 |
| IPI00219757; | GSTP1    | 61   | 2.22E-269 | -0.557 | 31  | 42.9  | Q1 |
| IPI00025318; | SH3BGRL  | 36   | 5.77E-67  | -0.557 | 7   | 5.8   | Q1 |
| IPI00217465; | HIST1H1C | 27.7 | 5.11E-35  | -0.555 | 17  | 77.1  | Q1 |
| IPI00413641; | AKR1B1   | 32.9 | 6.94E-14  | -0.555 | 10  | 10.2  | Q1 |
| IPI00884192; | GPX4     | 15.8 | 1.74E-21  | -0.553 | 3   | 12.3  | Q1 |
| IPI00293946  | UBXN4    | 6.9  | 1.16E-29  | -0.551 | 3   | 0.8   | Q1 |
| IPI00018235  | PEF1     | 8.8  | 3.00E-10  | -0.549 | 3   | 1.1   | Q1 |
| IPI00472164  | WASF2    | 7.4  | 6.63E-04  | -0.548 | 4   | 24.9  | Q1 |
| IPI00219077; | LTA4H    | 35.7 | <1.0E-304 | -0.548 | 18  | 11.9  | Q1 |
| IPI00007117; | SERPIN2  | 4.1  | 8.82E-05  | -0.548 | 2   | 19.7  | Q1 |
| IPI00604759; | FAHD1    | 23   | 7.43E-18  | -0.546 | 5   | 10.4  | Q1 |
| IPI00301561; | TRIP6    | 5.7  | 3.10E-03  | -0.543 | 2   | 9.7   | Q1 |
| IPI00295457; | MPRI3    | 24.6 | 1.83E-177 | -0.537 | 23  | 12.9  | Q1 |
| IPI00013981; | YES1     | 21   | 2.06E-31  | -0.535 | 10  | 8.4   | Q1 |
| IPI00020672; | DPP3     | 20.4 | 1.98E-122 | -0.534 | 15  | 14.6  | Q1 |
| IPI00026216; | NPEPPS   | 26.1 | 2.89E-110 | -0.532 | 22  | 14.9  | Q1 |
| IPI00307259; | DNAJC13  | 18.9 | 9.32E-175 | -0.528 | 40  | 12.3  | Q1 |
| IPI00013808; | ACTN4    | 74.5 | <1.0E-304 | -0.526 | 191 | 28.1  | Q1 |
| IPI00444945; | BAX      | 26.6 | 7.33E-111 | -0.525 | 5   | 6.2   | Q1 |
| IPI00477966; | TBC1D8B  | 2.2  | 1.88E-15  | -0.525 | 2   | 21.8  | Q1 |
| IPI00784366; | AP2B1    | 31.4 | 2.75E-231 | -0.525 | 56  | 22.4  | Q1 |
| IPI00291802; | LMO7     | 29.4 | 1.71E-299 | -0.524 | 47  | 17.5  | Q1 |

|              |          |      |           |        |    |       |    |
|--------------|----------|------|-----------|--------|----|-------|----|
| IPI00299977; | PHPT1    | 28   | 4.44E-82  | -0.524 | 3  | 1.3   | Q1 |
| IPI00219029; | GOT1     | 37.8 | 3.90E-121 | -0.523 | 15 | 11.4  | Q1 |
| IPI00157790; | ECM29    | 10.7 | 9.97E-166 | -0.523 | 23 | 46.6  | Q1 |
| IPI00410666; | SCRIB    | 1.3  | 3.60E-02  | -0.522 | 2  | 3.0   | Q1 |
| IPI00260715; | FUS      | 13.3 | 2.14E-60  | -0.522 | 14 | 43.9  | Q1 |
| IPI00220271; | AKR1A1   | 23.4 | 1.46E-51  | -0.520 | 9  | 65.4  | Q1 |
| IPI00304435; | NIPSNAP1 | 16.9 | 2.28E-02  | -0.519 | 5  | 9.0   | Q1 |
| IPI00400765; | KIAA1632 | 1.5  | 3.24E-21  | -0.518 | 3  | 118.0 | Q1 |
| IPI00294501  | DHCR7    | 11.6 | 4.20E-28  | -0.518 | 4  | 7.3   | Q1 |
| IPI00073958; | CNRIP1   | 30.5 | 3.57E-54  | -0.515 | 3  | 3.6   | Q1 |
| IPI00219446; | PEBP1    | 68.4 | 2.80E-192 | -0.515 | 14 | 6.1   | Q1 |
| IPI00026813; | FNTA     | 6.6  | 1.69E-03  | -0.513 | 2  | 18.6  | Q1 |
| IPI00291016  | NDUFV3   | 4.7  | 2.92E-03  | -0.512 | 2  | 13.5  | Q1 |
| IPI00010438; | SNAP23   | 12.3 | 4.91E-27  | -0.511 | 2  | 14.1  | Q1 |
| IPI00217766; | SCARB2   | 17.6 | 3.35E-32  | -0.510 | 16 | 25.8  | Q1 |
| IPI00604523; | MYL12B   | 16.9 | 1.11E-123 | -0.509 | 3  | 4.6   | Q1 |
| IPI00032292; | TIMP1    | 23.2 | 3.62E-19  | -0.508 | 4  | 14.7  | Q1 |
| IPI00023001; | FAM162A  | 11.7 | 2.21E-09  | -0.498 | 2  | 3.8   | Q2 |
| IPI00305010; | CPPED1   | 15.6 | 5.61E-63  | -0.497 | 5  | 8.3   | Q2 |
| IPI00169383; | PGK1     | 45.8 | 2.82E-189 | -0.496 | 23 | 43.0  | Q2 |
| IPI00413160; | TRIOBP   | 7.7  | 5.73E-82  | -0.496 | 19 | 19.0  | Q2 |
| IPI00215893; | HMOX1    | 51.4 | 1.96E-184 | -0.494 | 20 | 8.7   | Q2 |
| IPI00465256; | AK3      | 25.6 | 2.27E-14  | -0.492 | 6  | 4.4   | Q2 |
| IPI00027809; | PPP3CB   | 5    | 5.41E-12  | -0.492 | 3  | 11.3  | Q2 |
| IPI00902843; | CDIPT    | 19.8 | 6.93E-31  | -0.491 | 4  | 17.5  | Q2 |
| IPI00290462  | CBR3     | 41.2 | 1.62E-109 | -0.491 | 9  | 8.9   | Q2 |
| IPI00024282; | RAB8B    | 12.6 | 3.55E-49  | -0.491 | 4  | 1.3   | Q2 |
| IPI00004472; | WNK1     | 2.4  | 9.53E-24  | -0.490 | 5  | 39.9  | Q2 |
| IPI00257882; | PEPD     | 13.2 | 3.92E-67  | -0.488 | 5  | 7.0   | Q2 |
| IPI00746777; | ADH5     | 33.7 | 4.78E-41  | -0.481 | 12 | 9.1   | Q2 |
| IPI00304925; | HSPA1A   | 60.1 | <1.0E-304 | -0.481 | 68 | 28.6  | Q2 |
| IPI00010080; | OXR1     | 16.7 | 3.22E-78  | -0.480 | 7  | 3.7   | Q2 |
| IPI00384265; | FAM120A  | 19.7 | 8.02E-117 | -0.479 | 18 | 11.6  | Q2 |

|              |          |      |           |        |     |      |    |
|--------------|----------|------|-----------|--------|-----|------|----|
| IPI00296909  | PARP4    | 9.4  | 4.61E-71  | -0.479 | 16  | 11.8 | Q2 |
| IPI00396593; | PDLIM2   | 6    | 1.64E-10  | -0.478 | 2   | 3.2  | Q2 |
| IPI00021048; | MYOF     | 51.6 | <1.0E-304 | -0.474 | 154 | 56.3 | Q2 |
| IPI00855940; | XPO7     | 2.7  | 2.47E-06  | -0.474 | 3   | 14.2 | Q2 |
| IPI00293276  | MIF      | 9.6  | 1.25E-18  | -0.473 | 6   | 3.0  | Q2 |
| IPI00328154; | UBA3     | 4.5  | 2.46E-02  | -0.472 | 2   | 46.7 | Q2 |
| IPI00022164; | ARHGEF12 | 1.1  | 1.00E-02  | -0.471 | 2   | 64.3 | Q2 |
| IPI00017344; | RAB5B    | 13   | 1.97E-62  | -0.471 | 5   | 9.9  | Q2 |
| IPI00291646; | MTHFD1L  | 9.6  | 4.77E-24  | -0.470 | 8   | 17.5 | Q2 |
| IPI00295542; | NUCB1    | 16.1 | 9.83E-36  | -0.468 | 8   | 8.3  | Q2 |
| IPI00012728; | ACSL1    | 5.4  | 8.10E-07  | -0.467 | 4   | 11.8 | Q2 |
| IPI00902564; | EIF2A    | 1.7  | 5.86E-13  | -0.465 | 2   | 79.7 | Q2 |
| IPI00216171; | ENO2     | 3.7  | 8.15E-102 | -0.465 | 2   | 10.6 | Q2 |
| IPI00103064; | EXOC7    | 5.4  | 4.40E-46  | -0.464 | 3   | 3.2  | Q2 |
| IPI00909772; | AP2M1    | 5.9  | 1.38E-06  | -0.462 | 3   | 13.3 | Q2 |
| IPI00911039  | HSPA1A   | 1.5  | <1.0E-304 | -0.461 | 5   | 16.1 | Q2 |
| IPI00784414; | STAT3    | 18.2 | 8.64E-80  | -0.459 | 13  | 6.0  | Q2 |
| IPI00853454; | LAMB1    | 8.7  | 1.04E-212 | -0.458 | 15  | 40.4 | Q2 |
| IPI00552733  | CPLX3    | 3.8  | 1.00E+00  | -0.458 | 5   | 13.1 | Q2 |
| IPI00747403; | RNMT     | 5.8  | 6.33E-43  | -0.457 | 2   | 16.9 | Q2 |
| IPI00871585; | BID      | 15   | 5.75E-55  | -0.456 | 4   | 24.2 | Q2 |
| IPI00794402; | ARHGDI1A | 27.3 | 4.10E-146 | -0.452 | 16  | 30.6 | Q2 |
| IPI00022649; | SLC12A2  | 2.6  | 4.51E-06  | -0.450 | 2   | 19.4 | Q2 |
| IPI00332371; | PFKL     | 26.5 | 2.41E-228 | -0.448 | 26  | 6.6  | Q2 |
| IPI00100980; | EHD2     | 64.5 | 1.96E-275 | -0.443 | 45  | 29.1 | Q2 |
| IPI00657953; | TRIO     | 2.8  | 3.31E-26  | -0.443 | 11  | 92.9 | Q2 |
| IPI00221394; | DKC1     | 5.6  | 4.22E-09  | -0.441 | 3   | 8.6  | Q2 |
| IPI00789041; | PNN      | 6.6  | 8.66E-05  | -0.441 | 4   | 9.2  | Q2 |
| IPI00018352; | UCHL1    | 53.8 | 2.58E-170 | -0.439 | 22  | 8.7  | Q2 |
| IPI00926648; | APEH     | 14   | 1.29E-78  | -0.439 | 17  | 7.4  | Q2 |
| IPI00783097; | GARS     | 42.4 | <1.0E-304 | -0.438 | 47  | 32.7 | Q2 |
| IPI00884105; | LAMP1    | 15.3 | 1.16E-87  | -0.435 | 24  | 38.2 | Q2 |
| IPI00017704  | COTL1    | 47.2 | 7.10E-49  | -0.434 | 9   | 8.0  | Q2 |

|              |          |      |           |        |    |       |    |
|--------------|----------|------|-----------|--------|----|-------|----|
| IPI00014264; | ACAP2    | 3.1  | 1.15E-08  | -0.433 | 2  | 32.8  | Q2 |
| IPI00007935; | PDLIM5   | 30   | 1.07E-94  | -0.432 | 21 | 64.5  | Q2 |
| IPI00878984; | DDT      | 18.2 | 6.74E-41  | -0.430 | 4  | 8.4   | Q2 |
| IPI00304840; | COL6A2   | 27.7 | 5.45E-284 | -0.429 | 40 | 137.2 | Q2 |
| IPI00329719; | MYO1D    | 27.9 | 1.81E-150 | -0.429 | 36 | 24.5  | Q2 |
| IPI00015148; | RAP1B    | 44.6 | 3.37E-69  | -0.428 | 14 | 16.1  | Q2 |
| IPI00009505; | SNTB2    | 7.8  | 2.11E-15  | -0.428 | 5  | 20.6  | Q2 |
| IPI00647400  | RNPEP    | 5.1  | 4.44E-78  | -0.428 | 3  | 14.2  | Q2 |
| IPI00034277; | ATP13A1  | 12   | 1.25E-61  | -0.427 | 11 | 10.0  | Q2 |
| IPI00029054; | NT5C2    | 18.4 | 5.49E-58  | -0.426 | 9  | 6.0   | Q2 |
| IPI00896498; | MMP14    | 17.7 | 2.07E-56  | -0.426 | 15 | 33.5  | Q2 |
| IPI00746004; | RPS27L   | 13.1 | 2.95E-23  | -0.423 | 2  | 8.2   | Q2 |
| IPI00096066; | SUCLG2   | 8.6  | 6.89E-22  | -0.423 | 4  | 10.2  | Q2 |
| IPI00003949; | UBE2N    | 48   | 1.12E-77  | -0.419 | 20 | 65.8  | Q2 |
| IPI00643591; | AP1G1    | 10.5 | 7.32E-15  | -0.418 | 13 | 7.8   | Q2 |
| IPI00889541; | DDX17    | 18.7 | 1.10E-167 | -0.418 | 20 | 27.0  | Q2 |
| IPI00005158; | LONP1    | 23.6 | 1.25E-144 | -0.416 | 23 | 13.4  | Q2 |
| IPI00020178; | STAM     | 9.8  | 1.05E-106 | -0.415 | 4  | 18.0  | Q2 |
| IPI00005707; | MRC2     | 7.8  | 1.53E-85  | -0.415 | 13 | 20.7  | Q2 |
| IPI00761160; | CAST     | 32.7 | 6.86E-215 | -0.415 | 21 | 56.5  | Q2 |
| IPI00292134; | EPS15    | 8.3  | 6.58E-55  | -0.414 | 7  | 25.6  | Q2 |
| IPI00021828  | CSTB     | 58.2 | 2.45E-38  | -0.413 | 7  | 74.4  | Q2 |
| IPI00337541  | NNT      | 17.6 | 1.80E-215 | -0.412 | 21 | 8.3   | Q2 |
| IPI00900260; | ARHGEF7  | 3.7  | 3.05E-25  | -0.412 | 2  | 5.1   | Q2 |
| IPI00025849; | ANP32A   | 7.6  | 3.51E-74  | -0.410 | 2  | 6.9   | Q2 |
| IPI00873622; | WDR1     | 32.5 | 5.39E-206 | -0.409 | 19 | 11.6  | Q2 |
| IPI00220031; | PXN      | 16   | 5.12E-54  | -0.408 | 11 | 7.4   | Q2 |
| IPI00304171; | H2AFY    | 24.5 | 4.61E-35  | -0.405 | 8  | 16.6  | Q2 |
| IPI00430622  | SPG20    | 10.8 | 1.29E-14  | -0.404 | 7  | 3.2   | Q2 |
| IPI00719051; | EXOC5    | 8.9  | 3.60E-13  | -0.403 | 6  | 130.8 | Q2 |
| IPI00073179; | VPS33A   | 14.6 | 6.22E-27  | -0.401 | 6  | 7.9   | Q2 |
| IPI00013744  | ITGA2    | 6.9  | 1.64E-54  | -0.400 | 14 | 13.5  | Q2 |
| IPI00748472; | KIAA0196 | 25.2 | 2.28E-155 | -0.399 | 30 | 11.3  | Q2 |

|              |        |      |           |        |    |       |    |
|--------------|--------|------|-----------|--------|----|-------|----|
| IPI00218319; | TPM3   | 50   | 3.24E-243 | -0.398 | 25 | 39.8  | Q2 |
| IPI00300086; | QPRT   | 12.5 | 1.45E-10  | -0.395 | 4  | 6.5   | Q2 |
| IPI00037599; | TFCP2  | 5.8  | 6.86E-12  | -0.395 | 2  | 9.7   | Q2 |
| IPI00641829; | BAT1   | 5.2  | 1.51E-47  | -0.392 | 2  | 10.8  | Q2 |
| IPI00910977; | MPST   | 12.3 | 1.32E-09  | -0.391 | 2  | 3.9   | Q2 |
| IPI00070943; | PI4KA  | 2.6  | 4.91E-31  | -0.391 | 5  | 8.9   | Q2 |
| IPI00306960; | NARS   | 38.5 | 6.67E-237 | -0.390 | 29 | 13.8  | Q2 |
| IPI00746934; | UBR4   | 9.4  | 2.77E-275 | -0.389 | 46 | 78.2  | Q2 |
| IPI00020416; | TPP2   | 28.9 | <1.0E-304 | -0.389 | 34 | 10.1  | Q2 |
| IPI00642238; | HP1BP3 | 18.8 | 3.36E-42  | -0.389 | 16 | 16.1  | Q2 |
| IPI00396015; | ACACA  | 7.8  | 5.56E-48  | -0.387 | 18 | 8.3   | Q2 |
| IPI00221232  | GNG12  | 31.9 | 6.55E-22  | -0.387 | 2  | 8.8   | Q2 |
| IPI00010207; | UFM1   | 17.6 | 2.73E-02  | -0.386 | 3  | 50.9  | Q2 |
| IPI00216293; | TST    | 11.1 | 2.38E-11  | -0.386 | 3  | 19.7  | Q2 |
| IPI00032875; | ETFDH  | 5.5  | 1.94E-21  | -0.383 | 3  | 13.5  | Q2 |
| IPI00030851; | SEC24B | 4.9  | 6.58E-42  | -0.382 | 6  | 57.7  | Q2 |
| IPI00783559  | EXOC2  | 4.5  | 6.79E-11  | -0.379 | 4  | 12.4  | Q2 |
| IPI00375676; | FTL    | 22   | 3.04E-31  | -0.378 | 7  | 140.3 | Q2 |
| IPI00011285; | CAPN1  | 37.8 | 2.03E-214 | -0.376 | 42 | 8.8   | Q2 |
| IPI00018953; | DPP4   | 17.4 | 3.06E-64  | -0.374 | 24 | 21.1  | Q2 |
| IPI00644127; | IARS   | 35.9 | 1.58E-257 | -0.371 | 45 | 26.4  | Q2 |
| IPI00001699; | PYCARD | 9.7  | 1.97E-05  | -0.371 | 2  | 4.0   | Q2 |
| IPI00021167; | PRKRA  | 12.1 | 2.04E-12  | -0.370 | 3  | 6.4   | Q2 |
| IPI00006482; | ATP1A1 | 18.1 | 6.72E-214 | -0.370 | 34 | 38.8  | Q2 |
| IPI00024403; | CPNE3  | 14.9 | 9.45E-65  | -0.370 | 9  | 14.6  | Q2 |
| IPI00376229; | PACS1  | 8.6  | 1.29E-66  | -0.369 | 7  | 8.9   | Q2 |
| IPI00019450; | TROVE2 | 11   | 1.46E-10  | -0.368 | 7  | 18.0  | Q2 |
| IPI00789848; | IVD    | 4.5  | 3.54E-04  | -0.368 | 2  | 6.3   | Q2 |
| IPI00009305; | GNPDA1 | 37.4 | 2.53E-64  | -0.368 | 13 | 24.3  | Q2 |
| IPI00011454; | GANAB  | 49.2 | <1.0E-304 | -0.367 | 98 | 36.1  | Q2 |
| IPI00473047; | PRKAG1 | 20   | 2.39E-95  | -0.364 | 6  | 11.1  | Q2 |
| IPI00747533; | PGD    | 16.7 | 1.51E-124 | -0.364 | 6  | 5.9   | Q2 |
| IPI00001466; | EML4   | 8.8  | 2.65E-48  | -0.364 | 9  | 8.4   | Q2 |

|              |          |      |           |        |     |      |    |
|--------------|----------|------|-----------|--------|-----|------|----|
| IPI00853400; | FKBP15   | 3.4  | 5.84E-22  | -0.361 | 4   | 32.3 | Q2 |
| IPI00163851; | EIF2AK4  | 2.2  | 4.08E-04  | -0.359 | 3   | 18.4 | Q2 |
| IPI00006865  | SEC22B   | 54.9 | 1.14E-140 | -0.358 | 18  | 12.1 | Q2 |
| IPI00328350; | FAM129A  | 17.7 | 1.23E-65  | -0.358 | 19  | 9.0  | Q2 |
| IPI00021369; | CRYAB    | 58.9 | 4.19E-48  | -0.354 | 21  | 9.4  | Q2 |
| IPI00328170; | MOGS     | 6.8  | 8.27E-43  | -0.353 | 8   | 14.1 | Q2 |
| IPI00479905; | NDUFB10  | 22.7 | 7.89E-07  | -0.352 | 4   | 6.6  | Q2 |
| IPI00295461; | FAP      | 19.2 | 9.73E-91  | -0.351 | 19  | 10.3 | Q2 |
| IPI00790064; | NDUFB9   | 6.3  | 1.85E-10  | -0.351 | 2   | 3.1  | Q2 |
| IPI00642211; | RNPEP    | 30.9 | 5.11E-92  | -0.351 | 23  | 6.8  | Q2 |
| IPI00297492  | STT3A    | 8.7  | 9.04E-14  | -0.350 | 13  | 44.3 | Q2 |
| IPI00742743; | TP53BP1  | 4.2  | 1.83E-39  | -0.349 | 7   | 9.4  | Q2 |
| IPI00644297; | SKI2W    | 10   | 7.08E-74  | -0.348 | 11  | 31.7 | Q2 |
| IPI00171407; | STXBP5   | 4.9  | 2.89E-26  | -0.347 | 5   | 9.1  | Q2 |
| IPI00027780; | MMP2     | 6.8  | 4.39E-61  | -0.347 | 6   | 24.3 | Q2 |
| IPI00006176; | HGS      | 4.1  | 8.16E-12  | -0.346 | 3   | 18.1 | Q2 |
| IPI00470502; | PPA2     | 6.9  | 2.94E-32  | -0.346 | 2   | 6.0  | Q2 |
| IPI00219910; | BLVRB    | 46.9 | 4.72E-87  | -0.343 | 15  | 50.2 | Q2 |
| IPI00646689; | TXNDC17  | 26.8 | 1.84E-26  | -0.342 | 3   | 5.5  | Q2 |
| IPI00926903; | CHCHD3   | 24.6 | 3.50E-47  | -0.342 | 6   | 17.8 | Q2 |
| IPI00216057; | SORD     | 12.9 | 8.12E-06  | -0.341 | 3   | 41.8 | Q2 |
| IPI00384489; | AP1B1    | 8.7  | 4.33E-127 | -0.341 | 8   | 12.6 | Q2 |
| IPI00218733; | SOD1     | 23.4 | 3.09E-52  | -0.341 | 4   | 2.5  | Q2 |
| IPI00796379; | B2M      | 34.4 | 5.79E-14  | -0.340 | 5   | 3.6  | Q2 |
| IPI00025512; | HSPB1    | 82.4 | 2.64E-223 | -0.340 | 30  | 39.8 | Q2 |
| IPI00177728; | CNDP2    | 15.4 | 2.19E-21  | -0.339 | 6   | 13.2 | Q2 |
| IPI00219025; | GLRX     | 24.5 | 1.78E-21  | -0.338 | 5   | 18.4 | Q2 |
| IPI00892784; | ATP6V0A1 | 2.4  | 1.19E-07  | -0.338 | 4   | 4.1  | Q2 |
| IPI00221224  | ANPEP    | 50.8 | <1.0E-304 | -0.337 | 161 | 66.3 | Q2 |
| IPI00163849; | EPS15L1  | 0.9  | 1.27E-01  | -0.337 | 2   | 58.2 | Q2 |
| IPI00296157; | RETSAT   | 8.4  | 2.31E-19  | -0.337 | 3   | 7.7  | Q2 |
| IPI00008711  | WFS1     | 0.9  | 1.27E-01  | -0.336 | 2   | 33.1 | Q2 |
| IPI00438229; | TRIM28   | 25.5 | 4.18E-130 | -0.335 | 33  | 13.3 | Q2 |

|              |         |      |           |        |     |      |    |
|--------------|---------|------|-----------|--------|-----|------|----|
| IPI00337495; | PLOD2   | 14.5 | 6.81E-45  | -0.334 | 10  | 9.5  | Q2 |
| IPI00021785  | COX5B   | 17.8 | 4.48E-10  | -0.334 | 2   | 3.6  | Q2 |
| IPI00644671; | CC2D1B  | 3.6  | 5.23E-09  | -0.334 | 2   | 8.6  | Q2 |
| IPI00020557; | LRP1    | 17.7 | <1.0E-304 | -0.331 | 107 | 43.9 | Q2 |
| IPI00015842  | RCN1    | 29   | 8.63E-99  | -0.331 | 9   | 8.1  | Q2 |
| IPI00300567; | DCI     | 15.2 | 6.35E-46  | -0.330 | 4   | 12.5 | Q2 |
| IPI00925950; | TNS1    | 13.8 | 7.40E-197 | -0.327 | 20  | 39.7 | Q2 |
| IPI00183786; | FADS2   | 11.5 | 1.84E-06  | -0.325 | 7   | 5.2  | Q2 |
| IPI00001985; | VPS18   | 3    | 1.44E-07  | -0.324 | 3   | 7.9  | Q2 |
| IPI00290279; | ADK     | 10.2 | 2.75E-57  | -0.323 | 6   | 9.2  | Q2 |
| IPI00219219; | LGALS1  | 91.1 | 3.59E-140 | -0.322 | 28  | 14.6 | Q2 |
| IPI00006025; | SART3   | 11.2 | 1.19E-59  | -0.322 | 9   | 8.1  | Q2 |
| IPI00045051; | PURB    | 9.9  | 4.79E-06  | -0.321 | 4   | 9.9  | Q2 |
| IPI00396563; | UBXN1   | 7.7  | 5.43E-32  | -0.320 | 4   | 6.8  | Q2 |
| IPI00396967; | FHL2    | 9.5  | 2.54E-05  | -0.320 | 4   | 7.9  | Q2 |
| IPI00306380; | GNL3    | 6.6  | 5.47E-06  | -0.318 | 4   | 35.2 | Q2 |
| IPI00410590; | LSM14A  | 3.9  | 2.09E-03  | -0.318 | 2   | 8.2  | Q2 |
| IPI00095891; | GNAS    | 3.9  | 5.09E-14  | -0.317 | 5   | 7.5  | Q2 |
| IPI00024915; | PRDX5   | 55.1 | 6.00E-179 | -0.317 | 11  | 6.7  | Q2 |
| IPI00026848  | LRPAP1  | 11.8 | 1.39E-06  | -0.316 | 5   | 14.8 | Q2 |
| IPI00019376; | 11-Sep  | 8.4  | 8.84E-09  | -0.316 | 5   | 6.2  | Q2 |
| IPI00014589; | CLTB    | 10.5 | 3.42E-02  | -0.316 | 3   | 2.3  | Q2 |
| IPI00645431; | BAT3    | 9.3  | 2.06E-59  | -0.316 | 8   | 13.7 | Q2 |
| IPI00103994; | LARS    | 33.1 | <1.0E-304 | -0.314 | 41  | 9.2  | Q2 |
| IPI00184311; | ENPP1   | 4.8  | 5.99E-22  | -0.314 | 4   | 66.6 | Q2 |
| IPI00550682; | GRHPR   | 27.3 | 1.15E-55  | -0.314 | 9   | 6.8  | Q2 |
| IPI00456363; | ATXN2L  | 9.1  | 7.10E-21  | -0.313 | 8   | 14.7 | Q2 |
| IPI00220301; | PRDX6   | 66.1 | 5.03E-209 | -0.312 | 30  | 36.1 | Q2 |
| IPI00219840; | AP2S1   | 16.9 | 5.99E-04  | -0.311 | 3   | 10.7 | Q2 |
| IPI00219685; | NDUFA13 | 12.3 | 9.68E-10  | -0.309 | 4   | 12.3 | Q2 |
| IPI00000811; | PSMB6   | 17.6 | 1.26E-14  | -0.309 | 4   | 7.1  | Q2 |
| IPI00793199; | ANXA4   | 50.8 | 2.72E-143 | -0.309 | 22  | 9.6  | Q2 |
| IPI00790739; | ACO2    | 24.2 | 2.83E-99  | -0.308 | 26  | 14.2 | Q2 |

|              |         |      |           |        |     |       |    |
|--------------|---------|------|-----------|--------|-----|-------|----|
| IPI00029472; | ATE1    | 5.6  | 4.99E-18  | -0.307 | 2   | 29.4  | Q2 |
| IPI00783874; | HDHD2   | 8.1  | 1.92E-19  | -0.306 | 2   | 2.0   | Q2 |
| IPI00005979; | EIF2B4  | 10.5 | 3.70E-14  | -0.305 | 4   | 16.7  | Q2 |
| IPI00419847; | SORBS3  | 7.3  | 7.22E-35  | -0.305 | 4   | 53.1  | Q2 |
| IPI00012007  | AHCY    | 10.9 | 1.91E-13  | -0.305 | 6   | 5.6   | Q2 |
| IPI00014312; | CUL3    | 7.2  | 8.34E-30  | -0.303 | 4   | 4.3   | Q2 |
| IPI00100160; | CAND1   | 37.5 | 1.94E-270 | -0.302 | 59  | 29.4  | Q2 |
| IPI00746655; | FAM62A  | 46.3 | <1.0E-304 | -0.302 | 59  | 36.3  | Q2 |
| IPI00438170; | SNX12   | 21.5 | 9.26E-07  | -0.301 | 5   | 3.8   | Q2 |
| IPI00902614; | USP24   | 1.5  | 1.03E-10  | -0.301 | 5   | 20.9  | Q2 |
| IPI00219078; | ATP2A2  | 18.5 | 2.14E-170 | -0.300 | 33  | 57.3  | Q2 |
| IPI00090327; | VPS45   | 4    | 4.32E-07  | -0.299 | 2   | 4.9   | Q2 |
| IPI00019912; | HSD17B4 | 40.4 | 1.69E-216 | -0.299 | 33  | 11.2  | Q2 |
| IPI00290928; | GNA13   | 9    | 2.77E-33  | -0.296 | 3   | 6.3   | Q2 |
| IPI00376317; | EDC4    | 10   | 4.52E-70  | -0.296 | 11  | 31.4  | Q2 |
| IPI00017592  | LETM1   | 10.3 | 1.36E-63  | -0.293 | 7   | 7.8   | Q2 |
| IPI00914566; | FDPS    | 10.3 | 5.35E-07  | -0.291 | 4   | 9.7   | Q2 |
| IPI00299086; | SDCBP   | 58.4 | 3.21E-210 | -0.290 | 32  | 12.9  | Q2 |
| IPI00465059; | RHOT2   | 3.4  | 2.27E-13  | -0.289 | 2   | 4.1   | Q2 |
| IPI00914016; | DCTN4   | 13.9 | 1.99E-42  | -0.288 | 6   | 10.4  | Q2 |
| IPI00418262; | ALDOC   | 12.4 | 1.50E-163 | -0.288 | 10  | 66.0  | Q2 |
| IPI00178352; | FLNC    | 49   | <1.0E-304 | -0.287 | 280 | 98.0  | Q2 |
| IPI00376259; | SRGAP1  | 3.2  | 2.66E-33  | -0.286 | 3   | 14.5  | Q2 |
| IPI00026268; | GNB1    | 8.8  | 3.69E-37  | -0.286 | 3   | 13.2  | Q2 |
| IPI00006907  | TIGAR   | 13   | 1.16E-51  | -0.285 | 3   | 7.7   | Q2 |
| IPI00642904; | PABPC4  | 12.6 | 1.14E-171 | -0.285 | 13  | 100.7 | Q2 |
| IPI00026625; | NUP155  | 9.2  | 3.21E-41  | -0.284 | 11  | 14.7  | Q2 |
| IPI00014361; | TSTA3   | 17.4 | 3.19E-22  | -0.284 | 5   | 22.0  | Q2 |
| IPI00299193  | SYNJ2BP | 8.3  | 3.26E-15  | -0.284 | 2   | 9.1   | Q2 |
| IPI00103925  | IRGQ    | 3.7  | 1.62E-12  | -0.283 | 2   | 2.0   | Q2 |
| IPI00032003; | EMD     | 33.5 | 5.25E-123 | -0.282 | 11  | 19.7  | Q2 |
| IPI00550364  | PGM2    | 13.7 | 3.73E-45  | -0.281 | 9   | 15.8  | Q2 |
| IPI00927044; | POLR2H  | 18.3 | 1.01E-33  | -0.280 | 4   | 59.8  | Q2 |



|              |          |      |           |        |    |      |    |
|--------------|----------|------|-----------|--------|----|------|----|
| IPI00328318; | AGL      | 2    | 1.65E-11  | -0.280 | 3  | 17.7 | Q2 |
| IPI00013174; | RBM14    | 10.5 | 5.56E-52  | -0.279 | 6  | 7.4  | Q2 |
| IPI00013219; | ILK      | 6    | 1.64E-04  | -0.279 | 4  | 2.6  | Q2 |
| IPI00215716; | EPB41L3  | 27.7 | 1.50E-172 | -0.279 | 19 | 38.2 | Q2 |
| IPI00026570; | COX7A2   | 20   | 1.38E-27  | -0.279 | 2  | 0.6  | Q2 |
| IPI00301202; | MAGT1    | 6.3  | 8.04E-27  | -0.277 | 2  | 1.5  | Q2 |
| IPI00294943; | ARIH1    | 3.4  | 3.44E-03  | -0.277 | 2  | 19.3 | Q2 |
| IPI00514856; | UBAP2L   | 17.3 | 6.59E-112 | -0.276 | 14 | 76.4 | Q2 |
| IPI00646377; | EIF4G3   | 1.6  | 4.96E-16  | -0.276 | 4  | 18.8 | Q2 |
| IPI00013070; | HNRNPUL1 | 3.6  | 2.53E-12  | -0.275 | 5  | 36.4 | Q2 |
| IPI00328753; | KTN1     | 39.3 | 7.24E-225 | -0.275 | 50 | 25.2 | Q2 |
| IPI00008167; | ATP1B3   | 29.4 | 1.98E-45  | -0.274 | 6  | 17.2 | Q2 |
| IPI00016862; | GSR      | 3.6  | 2.34E-06  | -0.274 | 2  | 0.6  | Q2 |
| IPI00033025; | SEPT7    | 25.3 | 1.35E-141 | -0.273 | 8  | 13.8 | Q2 |
| IPI00000690; | AIFM1    | 18.3 | 5.88E-55  | -0.273 | 10 | 68.7 | Q2 |
| IPI00011107  | IDH2     | 2.4  | 4.75E-02  | -0.273 | 2  | 0.4  | Q2 |
| IPI00514127; | HDGF     | 18   | 5.48E-06  | -0.271 | 4  | 7.8  | Q2 |
| IPI00304267; | NXN      | 13.6 | 2.00E-23  | -0.271 | 4  | 15.6 | Q2 |
| IPI00168849; | TRIP10   | 6.3  | 2.66E-04  | -0.270 | 4  | 32.1 | Q2 |
| IPI00479722; | PSME1    | 44.2 | 9.45E-165 | -0.267 | 17 | 14.9 | Q2 |
| IPI00748502; | CRTAP    | 7.2  | 1.27E-07  | -0.265 | 3  | 8.5  | Q2 |
| IPI00219299  | TLN2     | 8.5  | 8.94E-299 | -0.264 | 22 | 44.7 | Q2 |
| IPI00025277  | PDCD6    | 23   | 1.36E-11  | -0.262 | 5  | 9.5  | Q2 |
| IPI00294495  | UFC1     | 21   | 3.09E-04  | -0.259 | 2  | 0.5  | Q2 |
| IPI00298547  | PARK7    | 59.8 | 1.43E-176 | -0.258 | 29 | 7.8  | Q2 |
| IPI00893197; | PPP2R4   | 10.5 | 3.54E-16  | -0.258 | 2  | 3.5  | Q2 |
| IPI00022265; | CCDC22   | 7.8  | 1.42E-28  | -0.256 | 3  | 9.8  | Q2 |
| IPI00017342  | RHOG     | 19.4 | 9.22E-49  | -0.254 | 4  | 5.0  | Q2 |
| IPI00218693; | APRT     | 50   | 9.55E-107 | -0.254 | 8  | 6.0  | Q2 |
| IPI00008034  | RAB23    | 20.3 | 4.85E-51  | -0.253 | 5  | 32.8 | Q2 |
| IPI00103509; | NDUFA10  | 5.4  | 1.09E-29  | -0.253 | 2  | 7.1  | Q2 |
| IPI00025049; | M6PR     | 8.3  | 2.43E-02  | -0.253 | 2  | 12.6 | Q2 |
| IPI00303868; | GYS1     | 5.3  | 1.08E-41  | -0.252 | 3  | 5.5  | Q2 |

|              |          |      |           |        |    |      |    |
|--------------|----------|------|-----------|--------|----|------|----|
| IPI00893918; | VAR5     | 33.5 | <1.0E-304 | -0.250 | 47 | 10.5 | Q2 |
| IPI00215901; | AK2      | 37.2 | 1.31E-52  | -0.250 | 8  | 31.3 | Q2 |
| IPI00012835; | CTBP1    | 9.1  | 3.38E-06  | -0.250 | 3  | 9.9  | Q2 |
| IPI00027280; | TOP2B    | 9.8  | 1.71E-155 | -0.250 | 17 | 46.6 | Q2 |
| IPI00305551; | GNA11    | 32   | 5.18E-123 | -0.249 | 10 | 11.7 | Q2 |
| IPI00009803; | ITGA4    | 2.4  | 8.33E-06  | -0.248 | 3  | 21.2 | Q2 |
| IPI00182728; | VPS4B    | 5.6  | 8.34E-03  | -0.248 | 2  | 15.7 | Q2 |
| IPI00003348; | GNB2     | 16.5 | 5.97E-41  | -0.246 | 6  | 15.7 | Q2 |
| IPI00007702; | HSPA2    | 15.8 | 1.96E-291 | -0.246 | 12 | 7.4  | Q2 |
| IPI00024919; | PRDX3    | 31.6 | 1.88E-76  | -0.245 | 13 | 12.8 | Q2 |
| IPI00015902; | PDGFRB   | 10.1 | 2.12E-58  | -0.244 | 11 | 16.8 | Q2 |
| IPI00298991; | KIAA1033 | 18.5 | 6.09E-181 | -0.243 | 21 | 10.3 | Q2 |
| IPI00003933; | HAGH     | 7.5  | 1.81E-02  | -0.243 | 2  | 5.8  | Q2 |
| IPI00216247; | PSMD4    | 7.1  | 4.46E-52  | -0.242 | 3  | 5.0  | Q2 |
| IPI00029997; | PGLS     | 48.4 | 1.37E-76  | -0.241 | 14 | 14.4 | Q2 |
| IPI00008575; | KHDRBS1  | 16.5 | 5.86E-46  | -0.241 | 8  | 5.4  | Q2 |
| IPI00792422; | FAM21A   | 13   | 6.67E-142 | -0.240 | 13 | 25.3 | Q2 |
| IPI00399265; | TPD52L2  | 61.6 | 6.98E-258 | -0.237 | 14 | 8.2  | Q2 |
| IPI00291930; | CLINT1   | 11.4 | 3.12E-15  | -0.236 | 7  | 15.2 | Q2 |
| IPI00011770; | NDUFA4   | 27.2 | 1.81E-08  | -0.235 | 2  | 2.5  | Q2 |
| IPI00470535; | CACNA2D1 | 2.8  | 1.40E-13  | -0.234 | 3  | 11.0 | Q2 |
| IPI00028618  | MGMT     | 15.1 | 1.29E-05  | -0.234 | 3  | 3.8  | Q2 |
| IPI00910781; | GPI      | 20.6 | 6.23E-72  | -0.233 | 28 | 7.3  | Q2 |
| IPI00017184; | EHD1     | 56.6 | 4.98E-207 | -0.233 | 35 | 26.9 | Q2 |
| IPI00396387; | GNL1     | 3.6  | 3.12E-22  | -0.232 | 2  | 8.7  | Q2 |
| IPI00412792; | BTF3L4   | 18.4 | 1.62E-01  | -0.231 | 2  | 0.0  | Q2 |
| IPI00000581; | OTUB1    | 25.6 | 5.44E-62  | -0.229 | 8  | 9.0  | Q2 |
| IPI00334715; | GRLF1    | 1.1  | 5.10E-02  | -0.229 | 2  | 12.4 | Q2 |
| IPI00029444; | C12orf10 | 14.4 | 1.90E-33  | -0.228 | 5  | 4.1  | Q2 |
| IPI00002372; | ABCD3    | 8.8  | 7.65E-11  | -0.228 | 5  | 10.1 | Q2 |
| IPI00219675; | RAC1     | 34.6 | 6.48E-47  | -0.228 | 9  | 7.1  | Q2 |
| IPI00023542; | TMED9    | 20   | 4.32E-84  | -0.227 | 10 | 8.6  | Q2 |
| IPI00029601; | CTTN     | 32.5 | 2.18E-165 | -0.227 | 31 | 16.8 | Q2 |

|              |           |      |           |        |    |      |    |
|--------------|-----------|------|-----------|--------|----|------|----|
| IPI00478653; | RPS6KA2   | 4.5  | 1.16E-11  | -0.225 | 4  | 14.4 | Q2 |
| IPI00418313; | ILF3      | 27.1 | 1.28E-155 | -0.224 | 39 | 51.0 | Q2 |
| IPI00307200  | SWAP70    | 31.5 | 5.52E-56  | -0.224 | 20 | 10.3 | Q2 |
| IPI00008223; | RAD23B    | 17.1 | 7.68E-88  | -0.223 | 8  | 59.7 | Q2 |
| IPI00303602; | AIDA      | 8.8  | 1.22E-05  | -0.221 | 3  | 22.4 | Q2 |
| IPI00032355; | PUM1      | 5.3  | 3.03E-49  | -0.219 | 6  | 13.1 | Q2 |
| IPI00291922  | PSMA5     | 52.3 | 1.16E-125 | -0.219 | 14 | 7.8  | Q2 |
| IPI00176903; | PTRF      | 17.7 | 4.85E-43  | -0.218 | 14 | 46.9 | Q2 |
| IPI00028564; | GBP1      | 13.7 | 2.02E-13  | -0.217 | 7  | 40.1 | Q2 |
| IPI00844375; | PSMB2     | 10   | 8.71E-54  | -0.216 | 2  | 8.6  | Q2 |
| IPI00216318; | YWHAB     | 46.7 | 3.74E-154 | -0.216 | 16 | 13.1 | Q2 |
| IPI00295940; | UNC84B    | 22.1 | 2.60E-166 | -0.216 | 18 | 9.5  | Q2 |
| IPI00477763  | CDC42BPB  | 4.9  | 3.19E-22  | -0.215 | 8  | 6.9  | Q2 |
| IPI00026105; | SCP2      | 11.9 | 1.48E-46  | -0.215 | 8  | 8.2  | Q2 |
| IPI00064767; | ARHGAP17  | 4.7  | 1.32E-08  | -0.215 | 3  | 14.8 | Q2 |
| IPI00550689; | C22orf28  | 11.7 | 5.58E-19  | -0.215 | 8  | 23.8 | Q2 |
| IPI00411452; | DOCK11    | 1.4  | 3.45E-05  | -0.214 | 3  | 16.8 | Q2 |
| IPI00927647; | POR       | 15.9 | 6.56E-46  | -0.213 | 10 | 9.4  | Q2 |
| IPI00005634  | TTC37     | 8.1  | 9.44E-126 | -0.213 | 9  | 10.8 | Q2 |
| IPI00759799; | HBEBP2BPA | 8    | 2.47E-32  | -0.213 | 2  | 0.2  | Q2 |
| IPI00001091  | AFG3L2    | 9    | 4.87E-11  | -0.213 | 8  | 6.1  | Q2 |
| IPI00168479; | APOA1BP   | 8.5  | 2.47E-25  | -0.211 | 3  | 6.2  | Q2 |
| IPI00215948; | CTNNA1    | 28.1 | 1.41E-138 | -0.211 | 29 | 7.4  | Q2 |
| IPI00002236; | MFGE8     | 9.8  | 3.39E-42  | -0.211 | 4  | 24.6 | Q2 |
| IPI00749454; | RFTN1     | 6.1  | 9.99E-24  | -0.210 | 4  | 8.5  | Q2 |
| IPI00301609  | NEK9      | 8.5  | 4.60E-91  | -0.209 | 10 | 58.8 | Q2 |
| IPI00456925; | DBNL      | 19.8 | 2.89E-105 | -0.209 | 6  | 4.5  | Q2 |
| IPI00221012; | USP9X     | 8.1  | 4.68E-91  | -0.208 | 25 | 58.3 | Q2 |
| IPI00018931  | VPS35     | 35.7 | 3.99E-212 | -0.207 | 48 | 31.9 | Q2 |
| IPI00470529; | GPNMB     | 5.8  | 9.77E-80  | -0.207 | 20 | 27.5 | Q2 |
| IPI00909484; | CDC42     | 20.3 | 2.28E-59  | -0.207 | 7  | 5.2  | Q2 |
| IPI00027175; | SRI       | 41.4 | 3.97E-32  | -0.207 | 9  | 9.6  | Q2 |
| IPI00004358; | PYGB      | 26.6 | 2.27E-166 | -0.206 | 27 | 20.3 | Q2 |

|              |          |      |           |        |    |      |    |
|--------------|----------|------|-----------|--------|----|------|----|
| IPI00333067; | HERC4    | 6.8  | 7.74E-09  | -0.206 | 5  | 7.7  | Q2 |
| IPI00023330; | KIAA1468 | 4    | 5.30E-40  | -0.205 | 4  | 5.5  | Q2 |
| IPI00398576; | LIMS2    | 4.9  | 2.17E-15  | -0.204 | 2  | 10.0 | Q2 |
| IPI00219301  | MARCKS   | 48.2 | 1.81E-210 | -0.204 | 14 | 7.7  | Q2 |
| IPI00020042; | PSMC4    | 9.1  | 1.48E-27  | -0.203 | 4  | 1.2  | Q2 |
| IPI00013290; | HDGFRP2  | 5.3  | 9.32E-39  | -0.203 | 4  | 18.3 | Q2 |
| IPI00411426; | VPS26A   | 22   | 1.39E-76  | -0.203 | 7  | 7.3  | Q2 |
| IPI00219034  | NDUFA8   | 22.7 | 2.42E-07  | -0.202 | 2  | 12.0 | Q2 |
| IPI00411937; | NOP56    | 20.4 | 5.46E-54  | -0.202 | 18 | 8.9  | Q2 |
| IPI00148063  | HEBP1    | 32.3 | 2.18E-11  | -0.202 | 4  | 5.2  | Q2 |
| IPI00023919; | PSMC5    | 6.2  | 1.01E-33  | -0.202 | 2  | 17.2 | Q2 |
| IPI00006379; | NOP58    | 23.3 | 3.63E-106 | -0.202 | 10 | 23.1 | Q2 |
| IPI00034319; | CUTA     | 7.1  | 1.42E-15  | -0.201 | 2  | 2.6  | Q2 |
| IPI00046057; | STXBP1   | 9.5  | 1.92E-75  | -0.201 | 6  | 11.9 | Q2 |
| IPI00639957; | CARM1    | 18.6 | 1.94E-47  | -0.201 | 11 | 18.5 | Q2 |
| IPI00016670  | C11orf59 | 23.6 | 7.97E-45  | -0.199 | 6  | 4.9  | Q2 |
| IPI00396131; | YTHDF3   | 13.3 | 4.94E-40  | -0.199 | 7  | 22.7 | Q2 |
| IPI00011302  | CD59     | 25   | 1.87E-35  | -0.199 | 6  | 9.1  | Q2 |
| IPI00465238; | C16orf62 | 4.1  | 8.76E-11  | -0.199 | 6  | 5.2  | Q2 |
| IPI00018398  | PSMC3    | 3.9  | 9.31E-50  | -0.198 | 2  | 15.7 | Q2 |
| IPI00030915; | USP8     | 4.1  | 1.74E-37  | -0.198 | 4  | 7.4  | Q2 |
| IPI00013475; | TUBB2A   | 8.5  | 5.57E-253 | -0.198 | 6  | 54.4 | Q2 |
| IPI00428967; | TIRAP3   | 11.4 | 4.19E-22  | -0.198 | 4  | 6.6  | Q2 |
| IPI00009771; | LMNB2    | 38.7 | 4.39E-167 | -0.197 | 42 | 11.1 | Q2 |
| IPI00030654; | CPSF6    | 13.4 | 8.83E-154 | -0.196 | 11 | 8.4  | Q2 |
| IPI00217357  | CCAR1    | 4.3  | 6.81E-34  | -0.196 | 5  | 7.7  | Q2 |
| IPI00002478; | ECE1     | 13.2 | 1.05E-35  | -0.195 | 10 | 10.4 | Q2 |
| IPI00795611; | GIT1     | 3    | 2.00E-03  | -0.194 | 2  | 18.1 | Q2 |
| IPI00011592; | DYNC1L12 | 10.8 | 1.88E-105 | -0.194 | 4  | 4.5  | Q2 |
| IPI00221325; | RANBP2   | 6    | 5.34E-145 | -0.193 | 17 | 30.2 | Q2 |
| IPI00010400; | PLCB3    | 9.3  | 2.21E-166 | -0.192 | 9  | 14.8 | Q2 |
| IPI00017292; | CTNNB1   | 12.9 | 8.33E-49  | -0.190 | 17 | 13.6 | Q2 |
| IPI00012831  | HBXIP    | 17.3 | 6.22E-04  | -0.188 | 2  | 1.5  | Q2 |

|              |               |      |           |        |    |      |    |
|--------------|---------------|------|-----------|--------|----|------|----|
| IPI00246616; | CLIP2         | 13.6 | 1.39E-19  | -0.188 | 13 | 43.7 | Q2 |
| IPI00022433; | HSPB6         | 54.9 | 1.35E-42  | -0.187 | 8  | 12.5 | Q2 |
| IPI00413961; | DKFZp666O0110 | 5.8  | 1.77E-27  | -0.186 | 5  | 34.1 | Q2 |
| IPI00024911  | ERP29         | 33   | 1.02E-109 | -0.186 | 10 | 7.5  | Q2 |
| IPI00002804; | PKN2          | 7.3  | 3.42E-53  | -0.186 | 5  | 8.4  | Q2 |
| IPI00152377; | STT3B         | 9.6  | 6.24E-32  | -0.185 | 17 | 35.2 | Q2 |
| IPI00157734; | EXOC3         | 14.3 | 1.48E-69  | -0.184 | 11 | 13.9 | Q2 |
| IPI00182540; | CTNND1        | 6.6  | 3.31E-15  | -0.184 | 16 | 13.0 | Q2 |
| IPI00480028; | ABI1          | 9.2  | 6.07E-17  | -0.183 | 4  | 4.5  | Q2 |
| IPI00293260; | DNAJC10       | 5.4  | 8.04E-54  | -0.182 | 4  | 5.8  | Q2 |
| IPI00303568; | PTGES2        | 12.2 | 5.31E-23  | -0.182 | 3  | 7.4  | Q2 |
| IPI00015952; | EIF4G2        | 16.1 | 5.66E-23  | -0.181 | 18 | 53.9 | Q2 |
| IPI00007155; | VPS28         | 12.2 | 3.73E-30  | -0.181 | 3  | 10.7 | Q2 |
| IPI00170935  | LRRC47        | 23.5 | 8.54E-101 | -0.181 | 15 | 11.8 | Q2 |
| IPI00171573; | CCDC109A      | 7.1  | 6.17E-11  | -0.180 | 2  | 6.3  | Q2 |
| IPI00419249; | PSMA3         | 37.3 | 3.36E-87  | -0.180 | 13 | 12.1 | Q2 |
| IPI00029048; | TTLL12        | 9.6  | 5.28E-34  | -0.179 | 6  | 5.3  | Q2 |
| IPI00299095  | SNX2          | 26.6 | 1.17E-98  | -0.179 | 26 | 11.3 | Q2 |
| IPI00872773; | ERO1L         | 15.4 | 1.33E-70  | -0.179 | 7  | 19.3 | Q2 |
| IPI00871693; | VAMP3         | 40   | 4.40E-13  | -0.178 | 4  | 5.9  | Q2 |
| IPI00872817; | GLIPR2        | 16.9 | 2.42E-37  | -0.178 | 2  | 16.2 | Q2 |
| IPI00748145; | GNAI2         | 29.6 | 3.09E-106 | -0.178 | 13 | 8.1  | Q2 |
| IPI00397947; | UBE2V1        | 13   | 2.56E-13  | -0.178 | 5  | 3.5  | Q2 |
| IPI00925052; | ARPC4         | 38   | 3.13E-43  | -0.177 | 7  | 8.0  | Q2 |
| IPI00021187; | RUVBL1        | 8.1  | 3.96E-15  | -0.177 | 3  | 4.3  | Q2 |
| IPI00000783; | PSMB8         | 9.1  | 2.05E-14  | -0.177 | 2  | 4.5  | Q2 |
| IPI00025796  | NDUFS3        | 20.5 | 1.52E-48  | -0.176 | 5  | 3.8  | Q2 |
| IPI00477962; | UAP1L1        | 1.4  | 1.55E-19  | -0.176 | 2  | 13.9 | Q2 |
| IPI00297626  | STXBP3        | 10.6 | 8.83E-19  | -0.176 | 7  | 18.4 | Q2 |
| IPI00020356; | MAP1A         | 13.9 | 6.23E-271 | -0.176 | 39 | 34.5 | Q2 |
| IPI00641743; | HCFC1         | 4.4  | 1.20E-45  | -0.176 | 9  | 33.7 | Q2 |
| IPI00009104; | RUVBL2        | 19   | 4.13E-65  | -0.175 | 7  | 10.9 | Q2 |
| IPI00024661  | SEC24C        | 12.5 | 6.05E-165 | -0.173 | 12 | 8.7  | Q2 |

|              |          |      |           |        |    |       |    |
|--------------|----------|------|-----------|--------|----|-------|----|
| IPI00183603; | OSTC     | 18.1 | 2.41E-16  | -0.173 | 3  | 3.6   | Q2 |
| IPI00304866; | TNFAIP2  | 5.7  | 3.75E-11  | -0.173 | 3  | 8.4   | Q2 |
| IPI00001914; | FKBP7    | 18.5 | 4.61E-29  | -0.173 | 5  | 9.4   | Q2 |
| IPI00871870; | ARPC3    | 56.7 | 1.50E-66  | -0.172 | 15 | 6.7   | Q2 |
| IPI00021983; | NCSTN    | 5.9  | 1.29E-23  | -0.170 | 7  | 19.6  | Q2 |
| IPI00647915; | TAGLN2   | 73.2 | 6.12E-237 | -0.169 | 30 | 7.0   | Q2 |
| IPI00399089  | MESDC2   | 24.8 | 1.91E-23  | -0.169 | 7  | 9.0   | Q2 |
| IPI00032140; | SERPINH1 | 49.5 | 1.80E-246 | -0.169 | 41 | 41.3  | Q2 |
| IPI00293078  | DDX27    | 3    | 1.52E-14  | -0.168 | 2  | 27.9  | Q2 |
| IPI00031583; | USO1     | 18   | 5.56E-120 | -0.167 | 25 | 9.5   | Q2 |
| IPI00298111; | SNX6     | 9.6  | 2.09E-36  | -0.167 | 4  | 33.0  | Q2 |
| IPI00815713; | TCOF1    | 3.9  | 8.57E-24  | -0.166 | 5  | 16.9  | Q2 |
| IPI00303882; | M6PRBP1  | 38.5 | 2.21E-263 | -0.166 | 13 | 8.4   | Q2 |
| IPI00027192; | PLOD1    | 32.7 | 4.10E-244 | -0.165 | 28 | 12.5  | Q2 |
| IPI00477155; | GTPBP4   | 2.9  | 7.64E-07  | -0.165 | 2  | 21.2  | Q2 |
| IPI00026087; | BANF1    | 34.8 | 6.51E-06  | -0.165 | 3  | 1.1   | Q2 |
| IPI00022891; | SLC25A4  | 6    | 8.16E-46  | -0.165 | 2  | 15.7  | Q2 |
| IPI00012079; | EIF4B    | 16.6 | 3.66E-17  | -0.165 | 13 | 137.3 | Q2 |
| IPI00550234; | ARPC5    | 38.4 | 4.09E-19  | -0.165 | 6  | 4.8   | Q2 |
| IPI00012011; | CFL1     | 86.7 | <1.0E-304 | -0.165 | 32 | 9.7   | Q2 |
| IPI00018522; | PRMT1    | 20.2 | 4.65E-75  | -0.164 | 7  | 8.7   | Q2 |
| IPI00748411; | SHMT2    | 8.4  | 4.04E-16  | -0.163 | 5  | 15.3  | Q2 |
| IPI00296830; | LUZP1    | 6    | 6.31E-39  | -0.162 | 6  | 10.1  | Q2 |
| IPI00299719; | TCIRG1   | 10.2 | 4.61E-13  | -0.161 | 7  | 68.1  | Q2 |
| IPI00023832; | SH3PXD2B | 10.6 | 6.12E-70  | -0.160 | 9  | 11.1  | Q2 |
| IPI00025084; | CAPNS1   | 60.1 | 2.05E-177 | -0.160 | 21 | 29.5  | Q2 |
| IPI00018206; | GOT2     | 27   | 6.86E-89  | -0.159 | 13 | 6.6   | Q2 |
| IPI00017895; | GPD2     | 14   | 4.09E-31  | -0.159 | 10 | 13.2  | Q2 |
| IPI00442344; | SLC27A1  | 2.9  | 3.21E-02  | -0.159 | 2  | 1.4   | Q2 |
| IPI00908949; | TARS     | 30.8 | 1.87E-168 | -0.158 | 39 | 10.1  | Q2 |
| IPI00029623; | PSMA6    | 34.1 | 2.25E-27  | -0.157 | 10 | 21.8  | Q2 |
| IPI00221327; | RTCD1    | 6.1  | 1.30E-05  | -0.156 | 2  | 37.3  | Q2 |
| IPI00871988; | SFXN3    | 36.8 | 1.17E-98  | -0.156 | 9  | 10.8  | Q2 |

|              |          |      |           |        |    |       |    |
|--------------|----------|------|-----------|--------|----|-------|----|
| IPI00293564; | HMGCL    | 13.5 | 1.88E-19  | -0.156 | 5  | 162.0 | Q2 |
| IPI00855846; | C6orf115 | 56.8 | 1.87E-44  | -0.156 | 3  | 4.4   | Q2 |
| IPI00291136  | COL6A1   | 32.7 | <1.0E-304 | -0.155 | 58 | 98.2  | Q2 |
| IPI00029046; | MLEC     | 30.5 | 1.77E-129 | -0.155 | 9  | 8.5   | Q2 |
| IPI00000015; | SFRS4    | 6.5  | 7.55E-07  | -0.155 | 7  | 25.0  | Q2 |
| IPI00017510  | MT-CO2   | 27.8 | 2.61E-87  | -0.155 | 8  | 6.2   | Q2 |
| IPI00020319; | BLOC1S1  | 14.4 | 6.45E-14  | -0.154 | 2  | 3.8   | Q2 |
| IPI00218288; | SEC24D   | 17.7 | 4.00E-55  | -0.153 | 23 | 43.7  | Q2 |
| IPI00472442; | PSMA1    | 27.1 | 2.94E-86  | -0.153 | 12 | 11.5  | Q2 |
| IPI00026546; | PAFAH1B2 | 14.8 | 1.92E-55  | -0.153 | 4  | 26.8  | Q2 |
| IPI00019407; | NSDHL    | 11   | 1.25E-04  | -0.153 | 4  | 58.7  | Q2 |
| IPI00456664; | NIT1     | 4.6  | 3.80E-04  | -0.152 | 2  | 3.7   | Q2 |
| IPI00293533  | NUP62    | 16.1 | 1.43E-54  | -0.150 | 8  | 6.0   | Q2 |
| IPI00217661; | RAVER1   | 2.9  | 5.18E-16  | -0.150 | 2  | 13.4  | Q2 |
| IPI00289876; | STX7     | 16.9 | 3.49E-69  | -0.149 | 3  | 5.0   | Q2 |
| IPI00375731; | RBM10    | 2.6  | 8.23E-32  | -0.149 | 2  | 18.2  | Q2 |
| IPI00555956  | PSMB4    | 37.9 | 1.16E-93  | -0.147 | 14 | 7.6   | Q2 |
| IPI00030774; | TBCD     | 12.5 | 6.90E-42  | -0.147 | 13 | 7.3   | Q2 |
| IPI00554541; | ILVBL    | 18.5 | 9.66E-38  | -0.146 | 10 | 9.0   | Q2 |
| IPI00337494; | SLC25A24 | 11.3 | 8.92E-22  | -0.145 | 5  | 6.8   | Q2 |
| IPI00024175; | PSMA7    | 38.7 | 2.08E-162 | -0.145 | 10 | 5.2   | Q2 |
| IPI00008240; | MARS     | 11   | 7.76E-61  | -0.144 | 10 | 23.1  | Q2 |
| IPI00219622; | PSMA2    | 47.4 | 5.84E-133 | -0.143 | 12 | 5.8   | Q2 |
| IPI00300096  | RAB35    | 7.5  | 3.81E-47  | -0.142 | 2  | 3.5   | Q2 |
| IPI00183002; | PPP1R12A | 23.4 | 2.00E-145 | -0.141 | 27 | 14.4  | Q2 |
| IPI00003588; | EEF1E1   | 24.1 | 4.61E-23  | -0.141 | 4  | 4.8   | Q2 |
| IPI00106646; | SDF4     | 8.8  | 1.40E-03  | -0.141 | 3  | 22.6  | Q2 |
| IPI00909064; | COASY    | 8.8  | 3.97E-23  | -0.139 | 5  | 9.9   | Q2 |
| IPI00305092; | WIBG     | 14.2 | 6.11E-02  | -0.138 | 2  | 2.1   | Q2 |
| IPI00479306; | PSMB5    | 31.6 | 8.65E-54  | -0.138 | 9  | 7.3   | Q2 |
| IPI00021466; | PAIP1    | 5.2  | 4.78E-09  | -0.138 | 2  | 12.2  | Q2 |
| IPI00000643  | BAG2     | 19.9 | 2.52E-12  | -0.137 | 5  | 4.9   | Q2 |
| IPI00024993  | ECHS1    | 25.5 | 1.92E-196 | -0.137 | 8  | 9.3   | Q2 |

|              |          |      |           |        |     |      |    |
|--------------|----------|------|-----------|--------|-----|------|----|
| IPI00216951; | DARS     | 16.6 | 2.95E-68  | -0.136 | 8   | 9.7  | Q2 |
| IPI00432363; | MACF1    | 1    | 5.66E-179 | -0.136 | 6   | 36.5 | Q2 |
| IPI00871780; | RBM12B   | 3.7  | 7.71E-53  | -0.135 | 3   | 21.0 | Q2 |
| IPI00015973; | EPB41L2  | 19.9 | 3.46E-94  | -0.134 | 16  | 66.1 | Q2 |
| IPI00642798  | SC65     | 6.4  | 3.80E-28  | -0.134 | 6   | 9.5  | Q2 |
| IPI00073436; | NECAP2   | 17.2 | 2.38E-30  | -0.133 | 3   | 3.2  | Q2 |
| IPI00748303; | ZFR      | 4.1  | 6.53E-08  | -0.133 | 3   | 11.2 | Q2 |
| IPI00009329; | UTRN     | 18.1 | <1.0E-304 | -0.133 | 59  | 13.2 | Q2 |
| IPI00419273; | CUL4A    | 3.7  | 5.21E-25  | -0.133 | 3   | 20.2 | Q2 |
| IPI00028004; | PSMB3    | 18   | 2.80E-50  | -0.131 | 8   | 13.5 | Q2 |
| IPI00152001; | TRIM3    | 2.8  | 2.27E-13  | -0.131 | 2   | 16.2 | Q2 |
| IPI00744637; | RUFY1    | 14.1 | 9.11E-46  | -0.131 | 11  | 18.2 | Q2 |
| IPI00641579; | CIRBP    | 10.8 | 3.05E-50  | -0.129 | 3   | 16.4 | Q2 |
| IPI00003031; | ISOC2    | 22.2 | 8.88E-21  | -0.128 | 2   | 5.7  | Q2 |
| IPI00642984; | BCAP31   | 16.3 | 8.37E-32  | -0.128 | 8   | 6.2  | Q2 |
| IPI00303476; | ATP5B    | 51.2 | <1.0E-304 | -0.128 | 26  | 81.1 | Q2 |
| IPI00100030; | PIGT     | 10.7 | 1.29E-21  | -0.128 | 6   | 9.8  | Q2 |
| IPI00794956; | SCFD1    | 22.4 | 4.56E-113 | -0.126 | 17  | 23.9 | Q2 |
| IPI00147874; | NANS     | 27.9 | 2.46E-39  | -0.126 | 8   | 32.8 | Q2 |
| IPI00000877; | HYOU1    | 44.3 | <1.0E-304 | -0.125 | 52  | 7.4  | Q2 |
| IPI00014197; | CDV3     | 20.2 | 5.33E-09  | -0.125 | 6   | 9.5  | Q2 |
| IPI00019502; | MYH9     | 71   | <1.0E-304 | -0.124 | 469 | 33.2 | Q2 |
| IPI00011898; | EIF2B5   | 2.5  | 1.35E-12  | -0.124 | 3   | 18.2 | Q2 |
| IPI00306290; | XPOT     | 6.5  | 2.57E-40  | -0.123 | 8   | 65.8 | Q2 |
| IPI00154603  | FGF2     | 3.5  | 6.26E-02  | -0.121 | 2   | 45.7 | Q2 |
| IPI00300299  | SPCS3    | 12.8 | 3.14E-22  | -0.121 | 2   | 5.8  | Q2 |
| IPI00291893; | DCUN1D1  | 9.3  | 5.31E-11  | -0.121 | 2   | 3.6  | Q2 |
| IPI00427501; | GHDC     | 1.5  | 1.86E-02  | -0.121 | 2   | 2.5  | Q2 |
| IPI00031670  | FAM114A1 | 21.8 | 4.76E-105 | -0.120 | 13  | 23.7 | Q2 |
| IPI00329692; | NMT1     | 16.5 | 7.44E-79  | -0.119 | 9   | 5.9  | Q2 |
| IPI00410082; | SPEF2    | 1.1  | 7.83E-01  | -0.118 | 3   | 8.4  | Q2 |
| IPI00719680; | AP3D1    | 22   | 2.93E-246 | -0.117 | 25  | 24.3 | Q2 |
| IPI00032830; | REXO2    | 24.9 | 1.36E-24  | -0.117 | 7   | 10.0 | Q2 |



|              |          |      |           |        |    |      |    |
|--------------|----------|------|-----------|--------|----|------|----|
| IPI00027180  | ZMPSTE24 | 11.6 | 2.27E-44  | -0.117 | 4  | 7.2  | Q2 |
| IPI00009906  | ARMCX3   | 9    | 6.88E-09  | -0.117 | 3  | 5.7  | Q2 |
| IPI00017341  | SF3A2    | 6.7  | 3.09E-05  | -0.117 | 3  | 14.5 | Q2 |
| IPI00646762; | NUDT5    | 22.8 | 5.56E-75  | -0.116 | 5  | 3.8  | Q2 |
| IPI00006579; | COX4I1   | 20.7 | 9.86E-14  | -0.116 | 5  | 3.7  | Q2 |
| IPI00006451; | NSF      | 41.1 | 3.99E-194 | -0.116 | 38 | 10.6 | Q2 |
| IPI00013271; | DERL1    | 7.6  | 1.04E-09  | -0.116 | 2  | 2.0  | Q2 |
| IPI00215998; | CD63     | 13.4 | 3.28E-08  | -0.116 | 24 | 27.1 | Q2 |
| IPI00009822; | SRP54    | 4.4  | 2.13E-21  | -0.115 | 2  | 31.3 | Q2 |
| IPI00009407  | DAD1     | 28.3 | 3.12E-27  | -0.113 | 4  | 2.0  | Q2 |
| IPI00216219; | TJP1     | 8.9  | 1.45E-68  | -0.113 | 13 | 11.1 | Q2 |
| IPI00219729; | SLC25A11 | 29.9 | 3.97E-73  | -0.112 | 8  | 4.9  | Q2 |
| IPI00015602; | TOMM70A  | 20.6 | 2.39E-65  | -0.112 | 13 | 7.0  | Q2 |
| IPI00007052  | FIS1     | 17.8 | 1.06E-25  | -0.112 | 2  | 0.3  | Q2 |
| IPI00002535  | FKBP2    | 18.3 | 2.52E-29  | -0.112 | 2  | 2.4  | Q2 |
| IPI00921428; | IMPA1    | 15.5 | 1.95E-22  | -0.111 | 5  | 7.3  | Q2 |
| IPI00299608; | PSMD1    | 28.1 | 2.83E-148 | -0.111 | 33 | 15.4 | Q2 |
| IPI00009950  | LMAN2    | 26.4 | 8.80E-14  | -0.110 | 8  | 19.6 | Q2 |
| IPI00604664; | NDUFS1   | 21.2 | 6.26E-170 | -0.110 | 12 | 8.6  | Q2 |
| IPI00922055; | DBI      | 24.3 | 7.28E-23  | -0.109 | 5  | 11.6 | Q2 |
| IPI00013895; | S100A11  | 81.9 | 1.17E-196 | -0.109 | 18 | 9.8  | Q2 |
| IPI00256861; | MACF1    | 9    | 2.37E-208 | -0.109 | 41 | 34.5 | Q2 |
| IPI00025874; | RPN1     | 43.7 | 9.75E-241 | -0.109 | 49 | 9.4  | Q2 |
| IPI00002188  | ARFGEF1  | 3    | 1.18E-31  | -0.109 | 5  | 4.5  | Q2 |
| IPI00871851; | NEDD5    | 54   | 2.76E-194 | -0.108 | 21 | 25.4 | Q2 |
| IPI00025019; | PSMB1    | 39.8 | 1.88E-137 | -0.108 | 22 | 8.6  | Q2 |
| IPI00007423; | ANP32B   | 31.9 | 4.16E-122 | -0.108 | 16 | 7.1  | Q2 |
| IPI00792837; | ZNF207   | 7.7  | 2.23E-08  | -0.108 | 3  | 12.6 | Q2 |
| IPI00413611; | TOP1     | 5.9  | 6.29E-09  | -0.106 | 4  | 2.7  | Q2 |
| IPI00004860; | RARS     | 41.5 | 1.01E-185 | -0.106 | 39 | 18.4 | Q2 |
| IPI00215917; | ARF3     | 59.1 | 8.34E-129 | -0.106 | 26 | 18.7 | Q2 |
| IPI00443909; | CNPY2    | 22   | 5.42E-63  | -0.105 | 4  | 4.2  | Q2 |
| IPI00220300; | ATP5J2   | 39.4 | 3.86E-31  | -0.104 | 3  | 0.8  | Q2 |

|              |                |      |           |        |    |      |    |
|--------------|----------------|------|-----------|--------|----|------|----|
| IPI00219953; | CMPK1          | 36.4 | 1.93E-124 | -0.104 | 13 | 7.0  | Q2 |
| IPI00908403; | ARL2           | 5.7  | 6.02E-13  | -0.104 | 2  | 5.7  | Q2 |
| IPI00029267  | SNRPB2         | 23.6 | 1.57E-02  | -0.103 | 6  | 17.7 | Q2 |
| IPI00186966; | BIN1           | 9.1  | 3.18E-25  | -0.103 | 4  | 6.6  | Q2 |
| IPI00029730; | STX4           | 7.4  | 1.36E-09  | -0.103 | 2  | 9.4  | Q2 |
| IPI00607799; | BDH2           | 15.5 | 4.81E-23  | -0.103 | 3  | 9.1  | Q2 |
| IPI00872762; | SUCLG1         | 8.7  | 9.93E-06  | -0.102 | 3  | 16.4 | Q2 |
| IPI00645446; | MCTS1          | 19.8 | 2.65E-58  | -0.102 | 3  | 6.3  | Q2 |
| IPI00329373  | QIL1           | 10.2 | 6.66E-01  | -0.102 | 3  | 3.6  | Q2 |
| IPI00000874; | PRDX1          | 47.7 | 1.17E-82  | -0.101 | 32 | 11.6 | Q2 |
| IPI00024157  | FKBP3          | 33.5 | 1.46E-86  | -0.101 | 11 | 57.5 | Q2 |
| IPI00026969; | SEC23IP        | 12.8 | 1.25E-52  | -0.100 | 13 | 4.2  | Q2 |
| IPI00023647; | UBA6           | 20.2 | 1.86E-171 | -0.100 | 21 | 11.6 | Q2 |
| IPI00027505; | ITGAV          | 25.2 | 7.94E-172 | -0.100 | 31 | 32.5 | Q2 |
| IPI00018871; | ARL8B          | 23.5 | 3.70E-13  | -0.100 | 6  | 9.2  | Q2 |
| IPI00016457; | CRAT           | 8.6  | 7.87E-46  | -0.099 | 6  | 6.2  | Q2 |
| IPI00005161; | ARPC2          | 51.3 | 1.34E-102 | -0.098 | 19 | 11.6 | Q2 |
| IPI00465428; | VPS13C         | 3.8  | 5.77E-40  | -0.098 | 11 | 18.2 | Q2 |
| IPI00013488; | CHN1           | 3.1  | 7.28E-01  | -0.098 | 2  | 2.2  | Q2 |
| IPI00028561; | KIF5C          | 1.7  | 3.55E-95  | -0.097 | 3  | 6.7  | Q2 |
| IPI00472939; | SPCS2          | 27.3 | 6.06E-16  | -0.097 | 9  | 8.1  | Q2 |
| IPI00007675; | DYNC1LI1       | 15.5 | 6.84E-78  | -0.096 | 7  | 14.1 | Q2 |
| IPI00413451; | DKFZp686I04222 | 40.6 | 3.04E-227 | -0.095 | 23 | 22.0 | Q2 |
| IPI00103467  | ALDH1B1        | 6.2  | 1.08E-27  | -0.095 | 2  | 2.1  | Q2 |
| IPI00172513  | APPL2          | 10.7 | 1.52E-62  | -0.094 | 6  | 8.5  | Q2 |
| IPI00760940; | ANP32A         | 4.5  | 1.45E-48  | -0.094 | 2  | 5.4  | Q2 |
| IPI00032064; | AKAP2          | 15.3 | 6.87E-150 | -0.093 | 20 | 42.3 | Q2 |
| IPI00306043; | YTHDF2         | 6.2  | 1.34E-21  | -0.093 | 3  | 10.9 | Q2 |
| IPI00004416; | CHMP2A         | 10.8 | 3.92E-02  | -0.091 | 4  | 22.6 | Q2 |
| IPI00465179; | PFKM           | 6.7  | 1.36E-39  | -0.091 | 5  | 9.9  | Q2 |
| IPI00889514; | HEATR7A        | 2.4  | 3.80E-18  | -0.091 | 4  | 10.0 | Q2 |
| IPI00444371; | WDR44          | 9.9  | 1.49E-49  | -0.091 | 7  | 14.0 | Q2 |
| IPI00643342; | PEA15          | 48.3 | 7.30E-40  | -0.089 | 9  | 10.4 | Q2 |

|              |          |      |           |        |     |      |    |
|--------------|----------|------|-----------|--------|-----|------|----|
| IPI00646556; | NDUFV2   | 13.5 | 2.36E-31  | -0.089 | 4   | 12.0 | Q2 |
| IPI00219018; | GAPDH    | 78.8 | <1.0E-304 | -0.089 | 91  | 72.5 | Q2 |
| IPI00847168; | RSU1     | 35.6 | 2.06E-86  | -0.089 | 12  | 88.4 | Q2 |
| IPI00168878  | TOR1AIP2 | 5.3  | 9.65E-06  | -0.087 | 2   | 9.1  | Q2 |
| IPI00923606; | EPRS     | 32   | 8.62E-295 | -0.087 | 61  | 60.4 | Q2 |
| IPI00645303; | SNX27    | 4.4  | 1.39E-02  | -0.087 | 2   | 4.5  | Q2 |
| IPI00336016; | CARS2    | 8.2  | 9.13E-11  | -0.087 | 2   | 9.2  | Q2 |
| IPI00293331  | POP1     | 1.9  | 6.99E-09  | -0.085 | 2   | 4.3  | Q2 |
| IPI00450472; | UBE2I    | 22.8 | 7.88E-03  | -0.084 | 4   | 4.5  | Q2 |
| IPI00299155; | PSMA4    | 42.5 | 5.98E-57  | -0.083 | 10  | 21.2 | Q2 |
| IPI00554681; | NDUFA5   | 31   | 4.81E-19  | -0.083 | 3   | 4.8  | Q2 |
| IPI00027230; | HSP90B1  | 48.3 | <1.0E-304 | -0.081 | 76  | 33.4 | Q2 |
| IPI00019755; | GSTO1    | 45.6 | 1.58E-40  | -0.081 | 20  | 41.4 | Q2 |
| IPI00478231; | RHOA     | 56   | 4.26E-145 | -0.080 | 21  | 13.2 | Q2 |
| IPI00028055; | TMED10   | 12.8 | 1.27E-51  | -0.080 | 6   | 10.7 | Q2 |
| IPI00292657; | PTGR1    | 31.9 | 2.52E-63  | -0.080 | 10  | 35.9 | Q2 |
| IPI00010090  | GCLM     | 15.3 | 4.25E-60  | -0.079 | 3   | 3.8  | Q2 |
| IPI00013897; | ADAM10   | 3.1  | 1.13E-07  | -0.079 | 2   | 4.6  | Q2 |
| IPI00456887; | HNRNPUL2 | 18.3 | 2.74E-69  | -0.079 | 22  | 11.2 | Q2 |
| IPI00031479; | PDIA5    | 13.3 | 2.37E-07  | -0.078 | 7   | 3.7  | Q2 |
| IPI00016608; | TMED2    | 27.9 | 7.47E-26  | -0.078 | 5   | 7.4  | Q2 |
| IPI00009507; | SYPL1    | 11.2 | 1.02E-12  | -0.078 | 3   | 50.7 | Q2 |
| IPI00376119; | PRKACB   | 11.3 | 6.10E-21  | -0.078 | 6   | 14.8 | Q2 |
| IPI00867509; | CORO1C   | 15   | 4.06E-51  | -0.077 | 10  | 44.1 | Q2 |
| IPI00002745; | CTSZ     | 10.6 | 1.57E-24  | -0.077 | 4   | 15.6 | Q2 |
| IPI00027434; | RHOC     | 18.7 | 2.75E-154 | -0.077 | 5   | 7.2  | Q2 |
| IPI00008708; | RSL1D1   | 19.6 | 1.77E-66  | -0.076 | 9   | 7.5  | Q2 |
| IPI00220739; | PGRMC1   | 35.9 | 2.36E-67  | -0.075 | 13  | 6.8  | Q2 |
| IPI00296337; | PRKDC    | 30.9 | <1.0E-304 | -0.075 | 188 | 74.5 | Q2 |
| IPI00306280; | DENR     | 12.6 | 3.32E-60  | -0.075 | 2   | 10.9 | Q2 |
| IPI00433279; | SLFN5    | 7.1  | 1.98E-47  | -0.074 | 6   | 6.8  | Q2 |
| IPI00179589; | MTPN     | 30.8 | 3.88E-66  | -0.074 | 4   | 5.0  | Q2 |
| IPI00028091; | ACTR3    | 16.5 | 7.56E-17  | -0.074 | 9   | 46.5 | Q2 |

|              |           |      |           |        |     |       |    |
|--------------|-----------|------|-----------|--------|-----|-------|----|
| IPI00154645; | TBC1D15   | 5.5  | 3.00E-28  | -0.073 | 3   | 8.1   | Q2 |
| IPI00742682; | TPR       | 12.4 | 5.69E-226 | -0.073 | 35  | 40.1  | Q2 |
| IPI00032831; | SNAP29    | 13.2 | 1.84E-41  | -0.072 | 3   | 23.8  | Q2 |
| IPI00873253; | SEC11A    | 8.3  | 6.78E-15  | -0.071 | 3   | 20.3  | Q2 |
| IPI00478410; | ATP5C1    | 21.1 | 2.60E-59  | -0.070 | 6   | 4.7   | Q2 |
| IPI00220487; | ATP5H     | 36.6 | 1.39E-72  | -0.069 | 5   | 2.9   | Q2 |
| IPI00873472; | SEC24A    | 12.4 | 3.27E-66  | -0.068 | 13  | 19.0  | Q2 |
| IPI00100656; | GPSN2     | 24.7 | 2.66E-15  | -0.068 | 12  | 12.1  | Q2 |
| IPI00005202  | PGRMC2    | 13.8 | 5.34E-66  | -0.067 | 5   | 9.5   | Q2 |
| IPI00020928; | TFAM      | 8.9  | 2.15E-02  | -0.067 | 2   | 4.3   | Q2 |
| IPI00297113; | TRIM32    | 4.4  | 3.93E-30  | -0.066 | 2   | 3.3   | Q2 |
| IPI00909773; | UBE2L3    | 21.7 | 3.59E-131 | -0.066 | 7   | 6.2   | Q2 |
| IPI00027808; | POLR2B    | 6.4  | 1.17E-38  | -0.065 | 7   | 6.9   | Q2 |
| IPI00374657; | VAPA      | 21.4 | 2.37E-53  | -0.065 | 10  | 55.6  | Q2 |
| IPI00028635; | RPN2      | 36.2 | 3.85E-198 | -0.065 | 33  | 19.1  | Q2 |
| IPI00412404  | SUPV3L1   | 2.9  | 1.53E-08  | -0.064 | 2   | 2.9   | Q2 |
| IPI00412672; | PKN1      | 5.2  | 8.05E-21  | -0.063 | 5   | 4.7   | Q2 |
| IPI00024129; | PPIC      | 20.8 | 1.87E-18  | -0.062 | 9   | 109.2 | Q2 |
| IPI00299571; | PDIA6     | 21.5 | 3.56E-47  | -0.062 | 7   | 77.0  | Q2 |
| IPI00009301; | COPS7B    | 19.3 | 6.21E-14  | -0.061 | 5   | 70.8  | Q2 |
| IPI00021129; | AP3B1     | 25   | 3.70E-165 | -0.060 | 33  | 20.0  | Q2 |
| IPI00026272; | HIST1H2AB | 57.7 | 7.58E-64  | -0.059 | 13  | 38.8  | Q2 |
| IPI00028888; | HNRNPD    | 23.4 | 2.98E-127 | -0.059 | 16  | 47.0  | Q2 |
| IPI00017726; | HSD17B10  | 61.7 | 1.46E-251 | -0.059 | 16  | 8.7   | Q2 |
| IPI00018272; | PNPO      | 6.5  | 1.37E-02  | -0.058 | 2   | 9.6   | Q2 |
| IPI00798102; | VPS29     | 23.5 | 7.69E-21  | -0.057 | 6   | 7.1   | Q2 |
| IPI00793155; | RAB34     | 18.4 | 2.75E-47  | -0.057 | 5   | 5.7   | Q2 |
| IPI00221226; | ANXA6     | 75.3 | <1.0E-304 | -0.056 | 124 | 20.9  | Q2 |
| IPI00219160; | RPL34     | 13.7 | 5.33E-03  | -0.056 | 3   | 5.4   | Q2 |
| IPI00843975; | EZR       | 40.1 | 3.20E-238 | -0.056 | 35  | 22.0  | Q2 |
| IPI00045839; | LEPRE1    | 14.7 | 5.35E-75  | -0.054 | 17  | 12.5  | Q2 |
| IPI00296053; | FH        | 7.8  | 8.59E-66  | -0.054 | 3   | 9.4   | Q2 |
| IPI00007611; | ATP5O     | 47.4 | 2.34E-165 | -0.054 | 9   | 9.1   | Q2 |

|              |           |      |           |        |     |      |    |
|--------------|-----------|------|-----------|--------|-----|------|----|
| IPI00002902  | NOL9      | 6.4  | 1.43E-05  | -0.053 | 3   | 8.4  | Q2 |
| IPI00006957; | DHRS7     | 12.4 | 5.13E-09  | -0.053 | 4   | 7.3  | Q2 |
| IPI00063827; | ABHD14B   | 28.1 | 1.96E-51  | -0.053 | 11  | 9.3  | Q2 |
| IPI00793375; | XPNPEP1   | 14   | 8.90E-64  | -0.052 | 9   | 6.7  | Q2 |
| IPI00029133; | ATP5F1    | 29.3 | 2.58E-58  | -0.052 | 11  | 39.7 | Q2 |
| IPI00216237  | RPL36     | 19   | 1.65E-10  | -0.052 | 3   | 4.4  | Q2 |
| IPI00020008; | NEDD8     | 17.3 | 2.67E-29  | -0.051 | 4   | 6.8  | Q2 |
| IPI00873899; | ABCF1     | 7.2  | 2.86E-27  | -0.051 | 8   | 19.5 | Q2 |
| IPI00185374; | PSMD12    | 25.4 | 1.67E-41  | -0.050 | 12  | 12.8 | Q2 |
| IPI00016112; | PXDN      | 7.5  | 9.22E-60  | -0.049 | 10  | 21.7 | Q2 |
| IPI00027448  | ATP5L     | 46.6 | 1.41E-39  | -0.048 | 4   | 4.2  | Q2 |
| IPI00294911  | SDHB      | 29.6 | 2.25E-48  | -0.048 | 10  | 6.6  | Q2 |
| IPI00480142; | CUL4B     | 13.8 | 1.68E-41  | -0.047 | 18  | 17.8 | Q2 |
| IPI00020101; | HIST1H2BC | 7.9  | 3.82E-49  | -0.046 | 6   | 10.9 | Q2 |
| IPI00026781  | FASN      | 43.4 | <1.0E-304 | -0.045 | 196 | 64.0 | Q2 |
| IPI00031461; | GDI2      | 27.4 | 1.73E-174 | -0.045 | 16  | 67.7 | Q2 |
| IPI00292753; | GAPVD1    | 2.4  | 7.23E-22  | -0.045 | 3   | 2.6  | Q2 |
| IPI00013297; | PDAP1     | 33.1 | 1.89E-46  | -0.044 | 7   | 8.7  | Q2 |
| IPI00007682  | ATP6V1A   | 36.3 | 1.90E-219 | -0.044 | 46  | 21.2 | Q2 |
| IPI00550917; | TWF2      | 32.7 | 5.80E-84  | -0.043 | 10  | 6.4  | Q2 |
| IPI00742670; | PON2      | 11.2 | 8.08E-84  | -0.043 | 4   | 15.0 | Q2 |
| IPI00916111; | MDH1      | 33.2 | 7.96E-117 | -0.043 | 13  | 15.0 | Q2 |
| IPI00167030  | KRTCAP2   | 10.5 | 1.06E-10  | -0.042 | 2   | 1.0  | Q2 |
| IPI00329536; | EEA1      | 48.5 | <1.0E-304 | -0.042 | 74  | 17.8 | Q2 |
| IPI00025158; | STAG1     | 1.7  | 1.51E-04  | -0.042 | 2   | 47.4 | Q2 |
| IPI00396171; | MAP4      | 52.9 | <1.0E-304 | -0.042 | 93  | 55.5 | Q2 |
| IPI00646304; | PPIB      | 60.6 | 2.10E-178 | -0.042 | 40  | 8.3  | Q2 |
| IPI00477231; | MGEA5     | 8.6  | 5.48E-18  | -0.041 | 7   | 17.6 | Q2 |
| IPI00217143; | SDHA      | 19.4 | 6.05E-109 | -0.041 | 12  | 46.0 | Q2 |
| IPI00409717; | EIF4A2    | 11.8 | 7.19E-105 | -0.041 | 4   | 8.4  | Q2 |
| IPI00011201; | ME2       | 16.3 | 1.25E-53  | -0.041 | 9   | 17.0 | Q2 |
| IPI00020472; | TMEM111   | 14.9 | 6.16E-69  | -0.040 | 3   | 5.9  | Q2 |
| IPI00747764; | KPNA6     | 5.9  | 3.67E-62  | -0.040 | 3   | 11.4 | Q2 |

|              |         |      |           |        |     |       |    |
|--------------|---------|------|-----------|--------|-----|-------|----|
| IPI00024642; | CCDC47  | 19.3 | 2.00E-37  | -0.039 | 13  | 8.1   | Q2 |
| IPI00220644; | PKM2    | 74.6 | <1.0E-304 | -0.039 | 154 | 49.2  | Q2 |
| IPI00217519; | RALA    | 25.2 | 1.23E-67  | -0.038 | 9   | 9.8   | Q2 |
| IPI00020984; | CANX    | 37   | 9.23E-191 | -0.038 | 60  | 40.9  | Q2 |
| IPI00011603; | PSMD3   | 37.6 | 1.87E-172 | -0.037 | 27  | 33.7  | Q2 |
| IPI00056334; | PRKCDBP | 26.1 | 7.49E-48  | -0.037 | 7   | 12.6  | Q2 |
| IPI00016405; | OCIAD1  | 8.2  | 3.30E-02  | -0.037 | 3   | 4.5   | Q2 |
| IPI00022793; | HADHB   | 10.5 | 6.74E-15  | -0.036 | 6   | 9.9   | Q2 |
| IPI00300074; | FARSB   | 33.6 | 1.66E-65  | -0.036 | 21  | 8.4   | Q2 |
| IPI00654582; | TOLLIP  | 14.5 | 3.30E-51  | -0.036 | 6   | 25.7  | Q2 |
| IPI00011268; | RALY    | 24.1 | 1.15E-30  | -0.036 | 8   | 52.1  | Q2 |
| IPI00298558; | PDCD10  | 21.2 | 6.40E-23  | -0.036 | 4   | 136.8 | Q2 |
| IPI00003217; | PSMB7   | 12.3 | 7.40E-12  | -0.035 | 4   | 5.2   | Q2 |
| IPI00009346  | TMEM14C | 50   | 3.21E-11  | -0.035 | 3   | 9.9   | Q2 |
| IPI00293350; | TSNAX   | 22.8 | 9.90E-49  | -0.034 | 8   | 9.2   | Q2 |
| IPI00444452; | MOV10   | 3    | 1.67E-26  | -0.034 | 4   | 4.9   | Q2 |
| IPI00871856; | STIP1   | 46.6 | 2.60E-130 | -0.034 | 34  | 9.2   | Q2 |
| IPI00024466; | UGCGL1  | 29.6 | <1.0E-304 | -0.034 | 54  | 26.9  | Q2 |
| IPI00005159; | ACTR2   | 43.7 | 2.18E-117 | -0.034 | 22  | 18.1  | Q2 |
| IPI00217056; | LEPREL2 | 12   | 1.09E-48  | -0.033 | 12  | 17.5  | Q2 |
| IPI00018195; | MAPK3   | 15   | 2.30E-51  | -0.033 | 5   | 3.7   | Q2 |
| IPI00419979; | PAK2    | 32   | 2.24E-111 | -0.033 | 18  | 7.9   | Q2 |
| IPI00103057; | FAM36A  | 20   | 3.46E-27  | -0.033 | 2   | 0.3   | Q2 |
| IPI00006211; | VAPB    | 26.7 | 3.57E-85  | -0.032 | 8   | 51.3  | Q2 |
| IPI00001960; | CLIC4   | 80.6 | 5.36E-198 | -0.031 | 34  | 6.9   | Q2 |
| IPI00003843; | TJP2    | 1.9  | 2.07E-02  | -0.031 | 3   | 10.8  | Q2 |
| IPI00304409  | CARHSP1 | 18.4 | 6.16E-37  | -0.031 | 3   | 0.5   | Q2 |
| IPI00440493; | ATP5A1  | 31.1 | <1.0E-304 | -0.030 | 22  | 45.0  | Q2 |
| IPI00646015; | ACOT9   | 4.7  | 6.29E-03  | -0.029 | 2   | 23.0  | Q2 |
| IPI00027107  | TUFM    | 7.9  | 5.17E-05  | -0.029 | 3   | 8.8   | Q2 |
| IPI00105598; | PSMD11  | 22   | 1.82E-72  | -0.028 | 10  | 7.5   | Q2 |
| IPI00005160; | ARPC1B  | 34.1 | 5.50E-69  | -0.027 | 10  | 7.1   | Q2 |
| IPI00183626; | PTBP1   | 31.2 | 2.24E-144 | -0.026 | 24  | 19.9  | Q2 |

|              |           |      |           |        |    |      |    |
|--------------|-----------|------|-----------|--------|----|------|----|
| IPI00926109; | DHX30     | 3.4  | 4.88E-09  | -0.025 | 3  | 12.3 | Q2 |
| IPI00025086  | COX5A     | 16.7 | 5.53E-36  | -0.025 | 4  | 5.1  | Q2 |
| IPI00103525; | PSPC1     | 18   | 4.76E-48  | -0.025 | 7  | 41.9 | Q2 |
| IPI00304692; | RBMX      | 9    | 3.25E-03  | -0.025 | 3  | 17.6 | Q2 |
| IPI00017334; | PHB       | 43.4 | 1.63E-191 | -0.024 | 13 | 8.2  | Q2 |
| IPI00642584; | KIAA0090  | 9.6  | 1.40E-46  | -0.024 | 8  | 11.5 | Q2 |
| IPI00005038; | HRSP12    | 19   | 3.37E-34  | -0.023 | 2  | 2.6  | Q2 |
| IPI00017160; | VTA1      | 11.1 | 7.64E-27  | -0.022 | 3  | 4.7  | Q2 |
| IPI00414717; | GLG1      | 16.3 | 2.83E-106 | -0.022 | 20 | 6.8  | Q2 |
| IPI00022597  | UBE2M     | 21.3 | 7.81E-05  | -0.022 | 5  | 55.5 | Q2 |
| IPI00025039  | FBL       | 15.6 | 1.04E-03  | -0.021 | 5  | 13.0 | Q2 |
| IPI00013723; | PIN1      | 20.9 | 1.24E-19  | -0.021 | 2  | 2.0  | Q2 |
| IPI00646350; | NAE1      | 11.7 | 1.75E-70  | -0.021 | 5  | 4.5  | Q2 |
| IPI00011876; | MTAP      | 16   | 1.26E-67  | -0.021 | 6  | 24.8 | Q2 |
| IPI00023234  | UBA2      | 13.9 | 1.08E-15  | -0.021 | 10 | 8.6  | Q2 |
| IPI00220014  | IDI1      | 21.5 | 1.00E-18  | -0.020 | 5  | 6.2  | Q2 |
| IPI00419194; | IAH1      | 14.5 | 1.16E-06  | -0.020 | 3  | 2.7  | Q2 |
| IPI00328415; | CYB5R3    | 50.9 | 3.19E-183 | -0.020 | 42 | 8.5  | Q2 |
| IPI00887678; | PPIA      | 49.8 | 3.29E-274 | -0.020 | 44 | 72.8 | Q2 |
| IPI00000030; | PPP2R5D   | 8.1  | 1.23E-19  | -0.020 | 8  | 7.1  | Q2 |
| IPI00010796; | P4HB      | 61   | <1.0E-304 | -0.019 | 86 | 31.1 | Q2 |
| IPI00021263; | YWHAZ     | 64.9 | 6.71E-291 | -0.019 | 30 | 15.1 | Q2 |
| IPI00305978; | AKR7A2    | 21.4 | 6.40E-88  | -0.019 | 11 | 41.4 | Q2 |
| IPI00027933  | PSMB10    | 7.3  | 5.12E-81  | -0.019 | 2  | 11.1 | Q2 |
| IPI00003935; | HIST2H2BE | 55.6 | 2.97E-49  | -0.019 | 24 | 10.2 | Q2 |
| IPI00030782; | STAT6     | 5.1  | 1.22E-20  | -0.018 | 4  | 8.1  | Q2 |
| IPI00012578  | KPNA4     | 9.6  | 2.73E-79  | -0.018 | 8  | 42.5 | Q2 |
| IPI00513791; | DOCK7     | 5    | 3.79E-49  | -0.017 | 10 | 12.2 | Q2 |
| IPI00382452  | CHMP1A    | 9.7  | 1.09E-04  | -0.017 | 2  | 5.8  | Q2 |
| IPI00289758; | CAPN2     | 29.6 | 3.95E-202 | -0.017 | 33 | 29.5 | Q2 |
| IPI00247871; | TCERG1    | 3.4  | 2.22E-09  | -0.016 | 4  | 3.0  | Q2 |
| IPI00291412; | PPM1F     | 9.9  | 1.12E-07  | -0.016 | 2  | 4.4  | Q2 |
| IPI00019383; | GALK1     | 10.2 | 5.53E-26  | -0.015 | 4  | 51.9 | Q2 |

|              |          |      |           |        |    |      |    |
|--------------|----------|------|-----------|--------|----|------|----|
| IPI00014587; | CLTA     | 23.8 | 4.55E-72  | -0.015 | 9  | 48.5 | Q2 |
| IPI00022202; | SLC25A3  | 34.5 | 8.14E-131 | -0.015 | 30 | 51.3 | Q2 |
| IPI00297982; | EIF2S3   | 12.7 | 2.04E-39  | -0.014 | 5  | 2.1  | Q2 |
| IPI00297084; | DDOST    | 38.6 | 5.58E-115 | -0.014 | 20 | 11.2 | Q2 |
| IPI00171611; | HIST2H3A | 52.9 | 7.42E-37  | -0.014 | 10 | 21.9 | Q2 |
| IPI00744692; | TALDO1   | 32.9 | 8.82E-81  | -0.012 | 13 | 11.9 | Q2 |
| IPI00002324; | MAT2B    | 20.1 | 1.00E-43  | -0.011 | 5  | 8.1  | Q2 |
| IPI00016339; | RAB5C    | 42.1 | 7.07E-129 | -0.011 | 17 | 8.1  | Q2 |
| IPI00455482; | RPL35    | 9.2  | 1.29E-03  | -0.011 | 4  | 10.7 | Q2 |
| IPI00028031; | ACADVL   | 30.7 | 7.63E-152 | -0.011 | 24 | 8.0  | Q2 |
| IPI00026219  | CPSF1    | 4.7  | 1.17E-27  | -0.011 | 7  | 6.3  | Q2 |
| IPI00021435; | PSMC2    | 11.3 | 1.29E-17  | -0.010 | 5  | 10.1 | Q2 |
| IPI00291419  | ACAT2    | 19.2 | 8.52E-25  | -0.010 | 10 | 8.2  | Q2 |
| IPI00060627  | CCDC124  | 10.8 | 1.53E-05  | -0.009 | 2  | 9.3  | Q2 |
| IPI00000816; | YWHAE    | 77.6 | <1.0E-304 | -0.009 | 42 | 29.5 | Q2 |
| IPI00796333; | ALDOA    | 61.7 | 8.41E-296 | -0.009 | 41 | 16.3 | Q2 |
| IPI00219153; | RPL22    | 20.3 | 6.81E-18  | -0.009 | 3  | 9.3  | Q2 |
| IPI00412147  | SLC27A4  | 3.1  | 8.09E-05  | -0.009 | 2  | 1.2  | Q2 |
| IPI00300371; | SF3B3    | 23.9 | <1.0E-304 | -0.008 | 33 | 27.6 | Q2 |
| IPI00000051  | PFDN1    | 15.6 | 4.50E-10  | -0.008 | 2  | 10.4 | Q2 |
| IPI00003856; | ATP6V1E1 | 28.3 | 7.12E-49  | -0.007 | 9  | 5.3  | Q2 |
| IPI00418213; | RABGEF1  | 4.1  | 9.15E-09  | -0.007 | 3  | 8.3  | Q2 |
| IPI00908605  | TUBB2C   | 32.6 | 2.01E-78  | -0.007 | 7  | 86.7 | Q2 |
| IPI00020567; | ARHGAP1  | 24   | 2.42E-161 | -0.006 | 9  | 80.2 | Q2 |
| IPI00215888; | SRP72    | 19.2 | 1.14E-50  | -0.006 | 10 | 6.9  | Q2 |
| IPI00023191; | TOM1     | 8    | 3.03E-55  | -0.006 | 3  | 14.0 | Q2 |
| IPI00306667; | CNP      | 4.8  | 2.95E-26  | -0.005 | 3  | 5.1  | Q2 |
| IPI00641582  | BAG3     | 4    | 2.07E-24  | -0.005 | 2  | 7.9  | Q2 |
| IPI00307155; | ROCK2    | 13.7 | 7.94E-134 | -0.005 | 19 | 16.0 | Q2 |
| IPI00059279; | EXOC4    | 4.3  | 6.15E-38  | -0.005 | 3  | 1.8  | Q2 |
| IPI00903296; | CDC42BPA | 1.5  | 3.74E-21  | -0.005 | 5  | 31.0 | Q2 |
| IPI00024971; | OSBP     | 2.2  | 3.71E-04  | -0.003 | 3  | 7.5  | Q2 |
| IPI00003925; | PDHB     | 27   | 2.80E-115 | -0.003 | 12 | 8.3  | Q2 |



|              |           |      |           |        |     |      |    |
|--------------|-----------|------|-----------|--------|-----|------|----|
| IPI00021440; | ACTG1     | 84.8 | <1.0E-304 | -0.002 | 243 | 44.5 | Q2 |
| IPI00852741; | SEC31A    | 29.1 | 6.14E-299 | -0.001 | 57  | 61.5 | Q2 |
| IPI00007812; | ATP6V1B2  | 8.4  | 1.52E-47  | 0.000  | 3   | 1.4  | Q2 |
| IPI00012866; | AKT1      | 7.3  | 3.92E-03  | 0.000  | 4   | 4.6  | Q2 |
| IPI00855767; | RAP1GDS1  | 34.4 | 2.73E-231 | 0.000  | 20  | 19.3 | Q2 |
| IPI00008524; | PABPC1    | 37.1 | 1.66E-231 | 0.000  | 57  | 91.0 | Q2 |
| IPI00163644; | OSBPL8    | 14.3 | 2.17E-153 | 0.000  | 18  | 10.8 | Q2 |
| IPI00293464; | DDB1      | 32   | 3.12E-201 | 0.000  | 42  | 16.6 | Q2 |
| IPI00479877; | ALDH9A1   | 9.3  | 4.41E-24  | 0.002  | 4   | 12.7 | Q2 |
| IPI00414442; | CDK5RAP3  | 22   | 1.24E-37  | 0.002  | 13  | 12.4 | Q2 |
| IPI00297261  | PTPN1     | 4.6  | 4.65E-07  | 0.003  | 2   | 0.1  | Q2 |
| IPI00014624  | AP3S1     | 14.3 | 6.10E-39  | 0.003  | 4   | 8.4  | Q2 |
| IPI00290542; | STAM2     | 7    | 4.62E-43  | 0.003  | 3   | 7.2  | Q2 |
| IPI00410485; | TAOK3     | 2.3  | 6.63E-18  | 0.005  | 2   | 5.8  | Q2 |
| IPI00031820; | FARSA     | 5.1  | 2.88E-09  | 0.005  | 3   | 8.7  | Q2 |
| IPI00003482; | DECR1     | 15.2 | 1.62E-10  | 0.005  | 6   | 53.1 | Q2 |
| IPI00031522; | HADHA     | 37.9 | 7.36E-249 | 0.006  | 41  | 13.7 | Q2 |
| IPI00218922; | SEC63     | 5.4  | 1.69E-08  | 0.006  | 6   | 10.0 | Q2 |
| IPI00006980; | C14orf166 | 30.7 | 1.82E-83  | 0.006  | 12  | 5.6  | Q2 |
| IPI00021405; | LMNA      | 69.7 | <1.0E-304 | 0.006  | 216 | 46.9 | Q2 |
| IPI00871890; | PICALM    | 26.8 | 1.53E-183 | 0.007  | 16  | 11.7 | Q2 |
| IPI00307092; | KARS      | 21.8 | 4.95E-76  | 0.007  | 23  | 45.6 | Q2 |
| IPI00027834; | HNRNPL    | 45   | 1.20E-189 | 0.007  | 19  | 19.1 | Q2 |
| IPI00018813; | COPS2     | 13.3 | 1.12E-22  | 0.008  | 6   | 12.6 | Q2 |
| IPI00607554; | USP47     | 2.9  | 9.71E-30  | 0.009  | 3   | 7.3  | Q2 |
| IPI00304596; | NONO      | 29.7 | 2.37E-50  | 0.009  | 19  | 14.1 | Q2 |
| IPI00022275; | SACM1L    | 15.5 | 4.04E-36  | 0.009  | 9   | 21.3 | Q2 |
| IPI00910850; | URM1      | 13.7 | 6.81E-06  | 0.009  | 2   | 1.5  | Q2 |
| IPI00002134; | PSMD5     | 9.9  | 1.24E-28  | 0.009  | 4   | 37.6 | Q2 |
| IPI00514587; | SARS      | 29.7 | 2.17E-81  | 0.009  | 17  | 13.5 | Q2 |
| IPI00015077; | EIF1      | 41.6 | 3.60E-87  | 0.010  | 5   | 1.0  | Q2 |
| IPI00744015; | DYNC112   | 13.2 | 1.13E-24  | 0.010  | 6   | 9.4  | Q2 |
| IPI00002966; | HSPA4     | 42.1 | <1.0E-304 | 0.011  | 52  | 9.6  | Q2 |

|              |          |      |           |       |    |       |    |
|--------------|----------|------|-----------|-------|----|-------|----|
| IPI00024664; | USP5     | 12   | 4.81E-65  | 0.011 | 11 | 16.4  | Q2 |
| IPI00025815; | TARDBP   | 2.9  | 2.61E-09  | 0.011 | 2  | 1.8   | Q2 |
| IPI00022229; | APOB     | 0.4  | 3.83E-22  | 0.011 | 2  | 14.2  | Q2 |
| IPI00219385  | NDUFB6   | 24.2 | 1.08E-04  | 0.012 | 2  | 25.1  | Q2 |
| IPI00103247; | HNRPLL   | 5.4  | 1.14E-29  | 0.013 | 2  | 1.9   | Q2 |
| IPI00333068; | ARPC1A   | 14.6 | 5.29E-33  | 0.013 | 5  | 4.5   | Q2 |
| IPI00914897; | KIAA1602 | 1.1  | 2.71E-01  | 0.013 | 2  | 3.4   | Q2 |
| IPI00141318; | CKAP4    | 61.5 | <1.0E-304 | 0.013 | 78 | 50.0  | Q2 |
| IPI00023526; | RAB6A    | 44.7 | 2.34E-57  | 0.014 | 15 | 10.8  | Q2 |
| IPI00026154; | PRKCSH   | 27.1 | 3.81E-106 | 0.015 | 40 | 24.4  | Q2 |
| IPI00021057; | SLC12A4  | 7    | 2.62E-15  | 0.015 | 7  | 11.1  | Q2 |
| IPI00015911; | DLD      | 7.9  | 3.12E-98  | 0.015 | 4  | 6.2   | Q2 |
| IPI00299573; | RPL7A    | 47.4 | 3.09E-204 | 0.015 | 24 | 8.6   | Q2 |
| IPI00555744  | RPL14    | 29.1 | 1.41E-62  | 0.017 | 9  | 182.4 | Q2 |
| IPI00008599; | EBP      | 16.5 | 5.94E-10  | 0.017 | 3  | 7.7   | Q2 |
| IPI00001568; | ATP6V1D  | 10.5 | 2.83E-38  | 0.018 | 3  | 8.5   | Q2 |
| IPI00745568; | TIPRL    | 14   | 1.77E-03  | 0.018 | 4  | 8.0   | Q2 |
| IPI00163496; | PPFIA1   | 3.1  | 1.42E-08  | 0.018 | 3  | 302.3 | Q2 |
| IPI00305166  | SDHA     | 2.8  | 5.01E-114 | 0.019 | 4  | 18.0  | Q2 |
| IPI00018415; | TM9SF2   | 3.5  | 2.43E-02  | 0.020 | 3  | 6.7   | Q2 |
| IPI00791086; | EIF3D    | 21.5 | 1.66E-108 | 0.021 | 13 | 30.2  | Q2 |
| IPI00009747; | LSS      | 14.1 | 2.86E-52  | 0.023 | 10 | 10.5  | Q2 |
| IPI00328715  | MTDH     | 11.7 | 1.61E-85  | 0.023 | 8  | 39.3  | Q2 |
| IPI00220503; | DCTN2    | 16.3 | 7.68E-96  | 0.024 | 7  | 7.5   | Q2 |
| IPI00377261; | FUBP3    | 16.6 | 1.41E-67  | 0.025 | 9  | 4.8   | Q2 |
| IPI00412497; | DYNLRB1  | 39.2 | 7.46E-26  | 0.027 | 4  | 9.9   | Q2 |
| IPI00453473  | HIST1H4A | 54.4 | 9.05E-79  | 0.028 | 38 | 39.5  | Q2 |
| IPI00217975; | LMNB1    | 48.5 | 6.28E-208 | 0.028 | 52 | 13.8  | Q2 |
| IPI00293655  | DDX1     | 26.8 | 7.71E-142 | 0.028 | 29 | 7.5   | Q2 |
| IPI00007144  | RPL26L1  | 36.6 | 5.09E-16  | 0.028 | 12 | 21.9  | Q2 |
| IPI00815770; | SNX3     | 48.8 | 5.69E-41  | 0.031 | 9  | 7.4   | Q2 |
| IPI00182757; | KIAA1967 | 15.5 | 7.30E-90  | 0.031 | 18 | 8.4   | Q2 |
| IPI00300504  | UPF2     | 1.3  | 8.90E-02  | 0.032 | 2  | 5.7   | Q2 |

|              |            |      |           |       |    |       |    |
|--------------|------------|------|-----------|-------|----|-------|----|
| IPI00419891; | SCFD2      | 6.7  | 2.55E-11  | 0.032 | 4  | 12.7  | Q2 |
| IPI00413344; | CFL2       | 37.3 | 1.43E-181 | 0.032 | 6  | 8.7   | Q2 |
| IPI00746318; | SGCD       | 7.2  | 1.14E-10  | 0.033 | 2  | 18.1  | Q2 |
| IPI00847544; | FMNL3      | 1.9  | 1.06E-04  | 0.033 | 2  | 0.6   | Q2 |
| IPI00646361; | NUP214     | 5.3  | 2.70E-97  | 0.033 | 10 | 9.4   | Q2 |
| IPI00003004; | SLC25A22   | 8.7  | 8.52E-08  | 0.033 | 2  | 1.7   | Q2 |
| IPI00100796  | CHMP5      | 17.8 | 1.12E-33  | 0.033 | 2  | 1.6   | Q2 |
| IPI00292000; | PRPF31     | 12.4 | 3.33E-40  | 0.034 | 7  | 7.1   | Q2 |
| IPI00796864; | DPM1       | 19.3 | 3.09E-48  | 0.034 | 6  | 8.8   | Q2 |
| IPI00816452; | MYO6       | 13.4 | 1.54E-85  | 0.035 | 15 | 126.3 | Q2 |
| IPI00556451; | ETFB       | 19.9 | 1.23E-19  | 0.036 | 8  | 7.9   | Q2 |
| IPI00216457; | HIST2H2AA3 | 30.8 | 1.42E-57  | 0.036 | 5  | 9.4   | Q2 |
| IPI00449049; | PARP1      | 31.9 | 5.00E-164 | 0.036 | 31 | 39.9  | Q2 |
| IPI00550032; | RP11       | 18.1 | 2.43E-46  | 0.036 | 3  | 6.9   | Q2 |
| IPI00215911; | APEX1      | 47.5 | 1.21E-76  | 0.037 | 12 | 102.3 | Q2 |
| IPI00178440; | EEF1B2     | 23.6 | 2.27E-93  | 0.038 | 7  | 7.3   | Q2 |
| IPI00456758  | RPL27A     | 31.1 | 1.52E-30  | 0.039 | 4  | 5.6   | Q2 |
| IPI00414554  | ARPC5L     | 20.9 | 7.74E-25  | 0.039 | 3  | 10.0  | Q2 |
| IPI00016179  | S100A13    | 27.6 | 5.61E-08  | 0.039 | 4  | 1.3   | Q2 |
| IPI00748360  | KIAA1797   | 3.1  | 6.43E-09  | 0.040 | 5  | 11.0  | Q2 |
| IPI00790757; | DUSP3      | 26.7 | 6.37E-49  | 0.040 | 5  | 3.8   | Q2 |
| IPI00787827; | PITRM1     | 14.5 | 1.07E-57  | 0.041 | 13 | 34.1  | Q2 |
| IPI00915872; | TNRC6B     | 2.7  | 1.43E-11  | 0.041 | 2  | 0.7   | Q2 |
| IPI00017763; | NAP1L4     | 5.7  | 3.03E-23  | 0.042 | 2  | 3.3   | Q2 |
| IPI00030363; | ACAT1      | 35.4 | 5.02E-78  | 0.042 | 14 | 15.5  | Q2 |
| IPI00013183; | UBA7       | 6.2  | 4.82E-89  | 0.043 | 4  | 8.9   | Q2 |
| IPI00411706; | ESD        | 41.5 | 1.15E-49  | 0.043 | 8  | 13.2  | Q2 |
| IPI00013004; | PDXK       | 26.9 | 2.49E-92  | 0.043 | 10 | 22.2  | Q2 |
| IPI00815642; | TMSB4X     | 38.6 | 1.98E-06  | 0.043 | 2  | 7.9   | Q2 |
| IPI00010201; | PSMD8      | 18.9 | 4.59E-30  | 0.043 | 8  | 2.9   | Q2 |
| IPI00464952; | SFRS11     | 8.1  | 2.04E-42  | 0.044 | 4  | 4.5   | Q2 |
| IPI00915855; | VDAC2      | 24.3 | 5.60E-36  | 0.045 | 9  | 22.3  | Q2 |
| IPI00027014; | DCTN3      | 15.1 | 5.81E-06  | 0.045 | 3  | 5.5   | Q2 |

|              |          |      |           |       |    |       |    |
|--------------|----------|------|-----------|-------|----|-------|----|
| IPI00925251; | SNRPG    | 22.1 | 2.08E-12  | 0.045 | 2  | 3.3   | Q2 |
| IPI00008438; | RPS10    | 29.1 | 1.81E-57  | 0.046 | 9  | 4.1   | Q2 |
| IPI00008274; | CAP1     | 4.8  | 1.04E-154 | 0.046 | 3  | 79.1  | Q2 |
| IPI00009976  | TMED1    | 17.2 | 6.96E-23  | 0.047 | 3  | 1.7   | Q2 |
| IPI00783271; | LRPPRC   | 46.6 | <1.0E-304 | 0.048 | 72 | 23.8  | Q2 |
| IPI00885108; | PATL1    | 4.3  | 1.26E-17  | 0.048 | 2  | 6.0   | Q2 |
| IPI00410118; | QKI      | 12.7 | 1.23E-06  | 0.049 | 4  | 10.8  | Q2 |
| IPI00848334; | KIF2A    | 2.6  | 1.58E-19  | 0.049 | 2  | 1.2   | Q2 |
| IPI00010810; | ETFA     | 42.6 | 6.97E-209 | 0.049 | 13 | 20.4  | Q2 |
| IPI00217468  | HIST1H1B | 15   | 1.33E-24  | 0.050 | 6  | 49.6  | Q2 |
| IPI00007814; | ATP6V1C1 | 8.9  | 2.13E-02  | 0.050 | 4  | 11.1  | Q2 |
| IPI00470779  | TXLNA    | 8.6  | 3.95E-22  | 0.051 | 7  | 114.2 | Q2 |
| IPI00103142  | NUDCD2   | 23.6 | 3.64E-28  | 0.051 | 3  | 4.5   | Q2 |
| IPI00009960; | IMMT     | 26.3 | 2.33E-109 | 0.052 | 25 | 11.2  | Q2 |
| IPI00010800; | NES      | 29.4 | <1.0E-304 | 0.052 | 56 | 42.1  | Q2 |
| IPI00396279; | CLASP1   | 3.6  | 6.29E-09  | 0.053 | 5  | 18.0  | Q2 |
| IPI00789159; | RPL23A   | 27.8 | 5.67E-34  | 0.053 | 13 | 11.3  | Q2 |
| IPI00872261; | AHCYL1   | 9.8  | 1.22E-10  | 0.053 | 6  | 9.1   | Q2 |
| IPI00009904; | PDIA4    | 44.3 | 1.22E-272 | 0.054 | 56 | 48.7  | Q2 |
| IPI00013466; | ASNA1    | 28.2 | 3.05E-75  | 0.054 | 8  | 16.6  | Q2 |
| IPI00014263; | EIF4H    | 49.2 | 5.83E-125 | 0.054 | 11 | 6.7   | Q2 |
| IPI00427330; | SBDS     | 45.6 | 5.28E-76  | 0.054 | 11 | 16.5  | Q2 |
| IPI00018768; | TSN      | 35.5 | 1.25E-61  | 0.055 | 8  | 11.0  | Q2 |
| IPI00012772; | RPL8     | 28   | 2.44E-33  | 0.055 | 8  | 7.2   | Q2 |
| IPI00783302; | PTCD3    | 1.9  | 2.78E-23  | 0.055 | 2  | 2.6   | Q2 |
| IPI00908416; | EIF4E    | 14.1 | 1.93E-11  | 0.055 | 4  | 21.1  | Q2 |
| IPI00550069  | RNH1     | 33.8 | 1.65E-177 | 0.056 | 11 | 43.9  | Q2 |
| IPI00152981; | ACAD9    | 13.4 | 7.48E-32  | 0.057 | 9  | 11.6  | Q2 |
| IPI00011916; | AIMP2    | 10.6 | 4.02E-07  | 0.057 | 3  | 3.5   | Q2 |
| IPI00644231; | CYFIP1   | 30.4 | 3.04E-290 | 0.057 | 42 | 14.0  | Q2 |
| IPI00300341; | TCEB1    | 41.1 | 1.93E-50  | 0.057 | 3  | 7.4   | Q2 |
| IPI00029629  | TRIM25   | 21.6 | 1.14E-95  | 0.059 | 19 | 15.5  | Q2 |
| IPI00219229  | LSM3     | 32.4 | 2.60E-05  | 0.059 | 2  | 7.3   | Q2 |

|              |          |      |           |       |     |      |    |
|--------------|----------|------|-----------|-------|-----|------|----|
| IPI00329598  | HSD17B11 | 25   | 2.64E-96  | 0.059 | 8   | 8.5  | Q2 |
| IPI00413324; | RPL17    | 36.4 | 1.23E-36  | 0.060 | 13  | 8.6  | Q2 |
| IPI00014439; | QDPR     | 30.3 | 1.04E-74  | 0.061 | 5   | 7.2  | Q2 |
| IPI00217413  | DHX29    | 4.1  | 1.60E-62  | 0.061 | 5   | 20.0 | Q2 |
| IPI00873403; | RPL24    | 24.3 | 2.05E-29  | 0.061 | 12  | 17.4 | Q2 |
| IPI00219526; | PGM1     | 48.6 | 1.97E-189 | 0.061 | 29  | 5.6  | Q2 |
| IPI00033022; | DNM2     | 19.8 | 6.85E-50  | 0.062 | 21  | 30.3 | Q2 |
| IPI00100151; | XRN2     | 4.8  | 9.59E-16  | 0.062 | 5   | 8.5  | Q2 |
| IPI00075248; | CALM1    | 67.8 | 1.20E-121 | 0.063 | 11  | 11.5 | Q2 |
| IPI00872940; | RPL30    | 63.5 | 3.18E-56  | 0.063 | 10  | 13.9 | Q2 |
| IPI00021812; | AHNAK    | 75.9 | <1.0E-304 | 0.063 | 787 | 80.8 | Q2 |
| IPI00220766  | GLO1     | 46.7 | 3.59E-88  | 0.063 | 15  | 26.4 | Q2 |
| IPI00644431; | DDX39    | 14.9 | 5.43E-44  | 0.064 | 7   | 38.2 | Q2 |
| IPI00171903; | HNRNPM   | 52.3 | 7.75E-249 | 0.064 | 72  | 16.9 | Q2 |
| IPI00414860; | RPL37A   | 29.3 | 5.67E-35  | 0.065 | 2   | 2.6  | Q2 |
| IPI00295209; | SNX5     | 8.9  | 3.48E-18  | 0.065 | 3   | 22.4 | Q2 |
| IPI00306301; | PDHA1    | 6.8  | 9.21E-11  | 0.066 | 3   | 14.4 | Q2 |
| IPI00409684; | NCKAP1   | 25.8 | 1.88E-126 | 0.066 | 35  | 19.1 | Q2 |
| IPI00215920  | ARF6     | 30.3 | 9.95E-40  | 0.066 | 6   | 10.7 | Q2 |
| IPI00011126; | PSMC1    | 10.9 | 1.64E-69  | 0.067 | 3   | 16.6 | Q2 |
| IPI00306516  | TIMM44   | 6.9  | 1.75E-14  | 0.067 | 3   | 5.3  | Q2 |
| IPI00219365; | MSN      | 64   | <1.0E-304 | 0.067 | 132 | 44.0 | Q2 |
| IPI00152692  | DTD1     | 14.8 | 4.17E-31  | 0.068 | 2   | 14.2 | Q2 |
| IPI00220642; | YWHAG    | 37.2 | 2.39E-143 | 0.068 | 12  | 8.2  | Q2 |
| IPI00305469; | CRK      | 39.7 | 2.95E-91  | 0.069 | 7   | 6.1  | Q2 |
| IPI00028005; | NUP107   | 5.5  | 6.05E-49  | 0.069 | 5   | 14.7 | Q2 |
| IPI00441473; | PRMT5    | 9.3  | 2.95E-21  | 0.069 | 7   | 8.2  | Q2 |
| IPI00220528  | SNRPF    | 15.1 | 4.27E-23  | 0.070 | 2   | 4.4  | Q2 |
| IPI00465233; | EIF3EIP  | 30   | 3.17E-265 | 0.070 | 19  | 32.1 | Q2 |
| IPI00217540; | KDM1     | 1.8  | 1.81E-02  | 0.070 | 2   | 20.6 | Q2 |
| IPI00295386; | CBR1     | 72.2 | <1.0E-304 | 0.070 | 25  | 15.8 | Q2 |
| IPI00246058; | PDCD6IP  | 34.8 | 9.45E-270 | 0.070 | 44  | 33.5 | Q2 |
| IPI00914529; | RPL28    | 23.1 | 2.07E-06  | 0.071 | 5   | 11.8 | Q2 |

|              |         |      |           |       |    |      |    |
|--------------|---------|------|-----------|-------|----|------|----|
| IPI00018274; | EGFR    | 14.4 | 1.24E-73  | 0.071 | 16 | 18.7 | Q2 |
| IPI00412224; | BRWD2   | 4.7  | 1.01E-52  | 0.074 | 6  | 67.8 | Q2 |
| IPI00440703; | GSTK1   | 25.5 | 6.74E-101 | 0.074 | 13 | 26.6 | Q2 |
| IPI00012074; | HNRNPR  | 22   | 2.24E-80  | 0.074 | 16 | 26.6 | Q2 |
| IPI00028050; | EEFSEC  | 3.7  | 1.23E-06  | 0.074 | 2  | 31.3 | Q2 |
| IPI00031691; | RPL9    | 43.8 | 2.30E-93  | 0.076 | 8  | 5.3  | Q2 |
| IPI00027096; | MRPL19  | 6.2  | 7.56E-03  | 0.076 | 2  | 12.7 | Q2 |
| IPI00465361; | RPL13   | 41.7 | 9.41E-30  | 0.076 | 13 | 44.6 | Q2 |
| IPI00004312; | STAT2   | 15   | 2.08E-42  | 0.077 | 19 | 27.3 | Q2 |
| IPI00072377; | SET     | 14.8 | 3.82E-41  | 0.077 | 6  | 10.2 | Q2 |
| IPI00019770; | FAU     | 8.3  | 3.95E-03  | 0.078 | 3  | 7.7  | Q2 |
| IPI00022664  | RABGGTA | 4.9  | 7.54E-04  | 0.078 | 3  | 5.1  | Q2 |
| IPI00334159  | VBP1    | 8.2  | 1.19E-12  | 0.078 | 3  | 1.6  | Q2 |
| IPI00307257; | TBC1D9B | 2.2  | 5.12E-81  | 0.079 | 2  | 25.4 | Q2 |
| IPI00007765; | HSPA9   | 40.9 | <1.0E-304 | 0.080 | 59 | 24.4 | Q2 |
| IPI00217490; | FNDC3B  | 7.6  | 5.62E-90  | 0.081 | 9  | 6.0  | Q2 |
| IPI00926977; | PSMC6   | 31   | 1.76E-136 | 0.081 | 11 | 15.1 | Q2 |
| IPI00020436; | RAB11B  | 56   | 7.10E-118 | 0.083 | 14 | 19.5 | Q2 |
| IPI00216691; | PFN1    | 91.4 | 1.21E-213 | 0.083 | 30 | 10.3 | Q2 |
| IPI00793201; | AIMP1   | 13.7 | 1.20E-26  | 0.084 | 4  | 7.0  | Q2 |
| IPI00028957; | UBE4A   | 3.4  | 1.22E-18  | 0.084 | 3  | 28.5 | Q2 |
| IPI00332511  | PPP2R2A | 6.7  | 6.30E-24  | 0.084 | 3  | 17.4 | Q2 |
| IPI00026627  | RP2     | 5.1  | 3.15E-03  | 0.085 | 2  | 5.7  | Q2 |
| IPI00017375; | SEC23A  | 50.8 | <1.0E-304 | 0.085 | 39 | 6.5  | Q2 |
| IPI00024006  | PIK3R4  | 2.5  | 1.35E-17  | 0.085 | 3  | 12.9 | Q2 |
| IPI00871680; | ARFGAP2 | 6    | 5.19E-09  | 0.085 | 3  | 6.7  | Q2 |
| IPI00014298; | PWP1    | 5.6  | 1.09E-18  | 0.085 | 2  | 21.4 | Q2 |
| IPI00008529; | RPLP2   | 47.8 | 4.29E-121 | 0.085 | 7  | 5.3  | Q2 |
| IPI00033143  | EIF3K   | 8.3  | 4.36E-05  | 0.086 | 2  | 0.5  | Q2 |
| IPI00554737; | PPP2R1A | 46.9 | 9.05E-250 | 0.086 | 35 | 8.0  | Q2 |
| IPI00016513  | RAB10   | 23   | 1.61E-45  | 0.088 | 5  | 10.9 | Q2 |
| IPI00925713; | RPL10   | 50.9 | 1.27E-98  | 0.089 | 18 | 6.7  | Q2 |
| IPI00010349; | AGPS    | 12   | 3.71E-77  | 0.090 | 6  | 7.9  | Q2 |

|              |          |      |           |       |    |       |    |
|--------------|----------|------|-----------|-------|----|-------|----|
| IPI00554521; | FTH1     | 25.1 | 1.16E-36  | 0.090 | 9  | 82.6  | Q2 |
| IPI00792743; | SLTM     | 5.4  | 1.06E-09  | 0.090 | 4  | 6.5   | Q2 |
| IPI00549725; | PGAM1    | 52   | 2.73E-225 | 0.091 | 22 | 11.8  | Q2 |
| IPI00005511  | PHF5A    | 14.5 | 7.93E-02  | 0.092 | 2  | 1.7   | Q2 |
| IPI00005578  | EHD4     | 24   | 1.12E-158 | 0.092 | 13 | 28.5  | Q2 |
| IPI00339384; | RDH11    | 19.5 | 1.59E-57  | 0.092 | 5  | 6.9   | Q2 |
| IPI00024821; | PSMD14   | 23.9 | 7.65E-18  | 0.092 | 6  | 5.8   | Q2 |
| IPI00215884; | SFRS1    | 30.6 | 1.41E-29  | 0.092 | 11 | 7.4   | Q2 |
| IPI00000070; | LDLR     | 2.6  | 1.52E-11  | 0.092 | 2  | 155.9 | Q2 |
| IPI00646058; | SAFB     | 2.8  | 4.88E-44  | 0.093 | 2  | 10.7  | Q2 |
| IPI00872430; | RPS8     | 40.1 | 2.59E-72  | 0.093 | 10 | 7.8   | Q2 |
| IPI00216746; | HNRNPK   | 43.3 | 2.18E-274 | 0.093 | 51 | 58.3  | Q2 |
| IPI00247583; | RPL21    | 36.9 | 2.81E-41  | 0.094 | 8  | 5.9   | Q2 |
| IPI00028565; | GBP2     | 3.2  | 6.36E-02  | 0.094 | 2  | 3.5   | Q2 |
| IPI00658155; | MRPS34   | 6.7  | 6.09E-02  | 0.095 | 2  | 2.0   | Q2 |
| IPI00395694; | TNPO3    | 6.4  | 6.86E-35  | 0.095 | 6  | 7.4   | Q2 |
| IPI00107753; | OPA1     | 2.5  | 8.85E-16  | 0.095 | 2  | 11.4  | Q2 |
| IPI00011913  | HNRNPA0  | 16.1 | 1.27E-69  | 0.095 | 4  | 5.0   | Q2 |
| IPI00291669  | UBLCP1   | 9.4  | 3.99E-04  | 0.095 | 3  | 8.7   | Q2 |
| IPI00030131; | TMPO     | 7.3  | 2.79E-66  | 0.096 | 3  | 7.8   | Q2 |
| IPI00001146  | LSM6     | 22.5 | 2.88E-09  | 0.097 | 2  | 2.1   | Q2 |
| IPI00003968; | NDUFA9   | 11.1 | 7.65E-09  | 0.098 | 3  | 9.8   | Q2 |
| IPI00014377; | RAB32    | 21.3 | 3.32E-16  | 0.098 | 5  | 11.4  | Q2 |
| IPI00010320; | CBX1     | 13.5 | 1.37E-49  | 0.098 | 2  | 14.4  | Q2 |
| IPI00250297  | AASDHPPT | 7.4  | 1.41E-23  | 0.099 | 2  | 2.2   | Q2 |
| IPI00301280; | TMEM43   | 35   | 3.17E-134 | 0.099 | 13 | 14.8  | Q2 |
| IPI00005719; | RAB1A    | 24.4 | 2.03E-205 | 0.100 | 6  | 3.8   | Q2 |
| IPI00016801; | GLUD1    | 15.8 | 2.30E-52  | 0.100 | 8  | 8.2   | Q2 |
| IPI00005198; | ILF2     | 20.8 | 6.16E-112 | 0.101 | 11 | 18.0  | Q2 |
| IPI00743623; | AK5      | 3.6  | 6.88E-05  | 0.102 | 2  | 23.6  | Q2 |
| IPI00021728; | EIF2S2   | 11.4 | 5.12E-31  | 0.102 | 5  | 4.3   | Q2 |
| IPI00024933; | RPL12    | 50.9 | 5.69E-116 | 0.102 | 9  | 10.5  | Q2 |
| IPI00005648; | SAFB2    | 11.2 | 5.30E-36  | 0.102 | 8  | 20.8  | Q2 |

|              |          |      |           |       |    |      |    |
|--------------|----------|------|-----------|-------|----|------|----|
| IPI00025717; | MTX2     | 14.4 | 7.27E-42  | 0.103 | 2  | 1.7  | Q2 |
| IPI00304189; | OPTN     | 14.7 | 9.58E-29  | 0.103 | 10 | 13.5 | Q2 |
| IPI00334190; | STOML2   | 27.8 | 4.75E-66  | 0.103 | 7  | 26.4 | Q2 |
| IPI00927531; | AP1S1    | 3.7  | 4.12E-01  | 0.103 | 2  | 1.2  | Q2 |
| IPI00179757  | KIF1C    | 1.8  | 3.52E-03  | 0.105 | 3  | 10.4 | Q2 |
| IPI00032851; | COPZ1    | 20.9 | 9.41E-74  | 0.105 | 4  | 7.3  | Q2 |
| IPI00008982; | ALDH18A1 | 27   | 5.08E-177 | 0.105 | 32 | 9.1  | Q2 |
| IPI00402183; | SYNCRIP  | 45.6 | 1.71E-187 | 0.105 | 48 | 49.9 | Q2 |
| IPI00382412; | BCAT1    | 5.3  | 1.72E-04  | 0.105 | 2  | 6.9  | Q2 |
| IPI00154451; | MMS19    | 3.6  | 1.70E-12  | 0.105 | 4  | 6.0  | Q2 |
| IPI00025252; | PDIA3    | 41.8 | 4.61E-218 | 0.106 | 49 | 37.1 | Q2 |
| IPI00020599; | CALR     | 43.4 | 7.03E-166 | 0.106 | 30 | 65.3 | Q2 |
| IPI00872597; | ZNF326   | 4.3  | 5.49E-22  | 0.106 | 2  | 2.3  | Q2 |
| IPI00412987; | GMFB     | 26.6 | 1.97E-20  | 0.106 | 3  | 5.8  | Q2 |
| IPI00031131; | APMAP    | 5.3  | 1.78E-05  | 0.107 | 2  | 19.5 | Q2 |
| IPI00221091; | RPS15A   | 32.3 | 8.44E-32  | 0.108 | 8  | 5.6  | Q2 |
| IPI00104050  | THRAP3   | 16.8 | 6.72E-58  | 0.108 | 16 | 9.3  | Q2 |
| IPI00218465; | PLAA     | 17.2 | 9.06E-118 | 0.109 | 10 | 12.5 | Q2 |
| IPI00026850; | TSPO     | 18.3 | 1.49E-06  | 0.109 | 2  | 5.4  | Q2 |
| IPI00844000  | KIAA0776 | 6.7  | 1.82E-47  | 0.109 | 6  | 10.0 | Q2 |
| IPI00827508; | RPL10A   | 42.9 | 2.07E-96  | 0.110 | 16 | 6.1  | Q2 |
| IPI00017283  | IARS2    | 7.5  | 3.79E-19  | 0.110 | 12 | 12.3 | Q2 |
| IPI00006079; | BCLAF1   | 8.5  | 6.13E-10  | 0.111 | 10 | 22.5 | Q2 |
| IPI00791325; | KIAA0020 | 6.7  | 1.06E-14  | 0.114 | 4  | 9.0  | Q2 |
| IPI00025974  | CHMP4B   | 15.6 | 2.07E-17  | 0.114 | 3  | 12.5 | Q2 |
| IPI00064193; | TMX3     | 12.1 | 1.66E-65  | 0.114 | 3  | 3.3  | Q2 |
| IPI00010105; | EIF6     | 30.2 | 9.67E-108 | 0.115 | 7  | 28.1 | Q2 |
| IPI00221093; | RPS17    | 38.5 | 1.05E-96  | 0.115 | 7  | 5.0  | Q2 |
| IPI00028946; | RTN3     | 15.3 | 5.05E-09  | 0.115 | 5  | 27.9 | Q2 |
| IPI00465308; | PIGS     | 11.5 | 1.13E-109 | 0.116 | 7  | 8.3  | Q2 |
| IPI00025285; | ATP6V1G1 | 42.4 | 1.88E-103 | 0.116 | 7  | 6.7  | Q2 |
| IPI00329791  | DDX46    | 14.6 | 1.37E-56  | 0.116 | 14 | 7.6  | Q2 |
| IPI00376005; | EIF5A    | 69   | 5.19E-226 | 0.117 | 18 | 10.7 | Q2 |



|              |         |      |           |       |     |      |    |
|--------------|---------|------|-----------|-------|-----|------|----|
| IPI00007426; | ARL6IP5 | 24.5 | 2.82E-29  | 0.117 | 12  | 60.5 | Q2 |
| IPI00383849; | PLCG1   | 2.6  | 2.97E-03  | 0.117 | 3   | 12.1 | Q2 |
| IPI00333913; | NBAS    | 2.7  | 8.60E-20  | 0.119 | 6   | 27.2 | Q2 |
| IPI00830108; | DNAJC2  | 4    | 4.82E-11  | 0.119 | 2   | 4.5  | Q2 |
| IPI00017451; | SF3A1   | 20.1 | 9.87E-39  | 0.119 | 17  | 9.5  | Q2 |
| IPI00456969; | DYNC1H1 | 47.5 | <1.0E-304 | 0.119 | 336 | 63.6 | Q2 |
| IPI00917683; | SUMO1   | 15.8 | 3.50E-03  | 0.119 | 3   | 11.1 | Q2 |
| IPI00216308; | VDAC1   | 57.6 | 2.20E-113 | 0.120 | 22  | 17.1 | Q2 |
| IPI00807557; | PA2G4   | 15.5 | 2.39E-38  | 0.120 | 7   | 9.6  | Q2 |
| IPI00023591  | PURA    | 5.3  | 3.23E-03  | 0.120 | 2   | 14.0 | Q2 |
| IPI00005969; | CAPZA1  | 35.7 | 5.68E-89  | 0.120 | 7   | 4.8  | Q2 |
| IPI00413100; | PHLDB1  | 2    | 1.06E-14  | 0.120 | 4   | 2.0  | Q2 |
| IPI00009070; | HBS1L   | 6    | 1.93E-31  | 0.121 | 3   | 2.4  | Q2 |
| IPI00384051; | PSME2   | 49.4 | 3.53E-115 | 0.121 | 11  | 5.5  | Q2 |
| IPI00783781; | NUP205  | 4.9  | 6.90E-23  | 0.121 | 11  | 9.4  | Q2 |
| IPI00003362; | HSPA5   | 52.7 | <1.0E-304 | 0.121 | 135 | 43.6 | Q2 |
| IPI00749013; | UBE2D3  | 18.9 | 1.22E-05  | 0.122 | 2   | 11.0 | Q2 |
| IPI00301489; | UROD    | 9.5  | 1.54E-11  | 0.122 | 3   | 15.0 | Q2 |
| IPI00877662; | RAB13   | 10.7 | 4.14E-53  | 0.123 | 3   | 3.8  | Q2 |
| IPI00017596; | MAPRE1  | 26.1 | 2.01E-68  | 0.124 | 6   | 3.6  | Q2 |
| IPI00023530; | CDK5    | 5.5  | 3.55E-02  | 0.124 | 4   | 5.2  | Q2 |
| IPI00329512; | SNRPB   | 13.1 | 3.42E-38  | 0.124 | 8   | 42.0 | Q2 |
| IPI00903286; | SNRPD1  | 20.8 | 2.70E-59  | 0.124 | 4   | 2.6  | Q2 |
| IPI00013184; | ARD1A   | 12.3 | 4.22E-16  | 0.125 | 3   | 1.3  | Q2 |
| IPI00010153; | RPL23   | 45.7 | 4.88E-135 | 0.125 | 9   | 5.5  | Q2 |
| IPI00021840; | RPS6    | 31.7 | 2.17E-29  | 0.125 | 11  | 13.9 | Q2 |
| IPI00219155; | RPL27   | 34.6 | 1.49E-09  | 0.125 | 5   | 4.5  | Q2 |
| IPI00409635; | FAM62B  | 8.3  | 1.67E-71  | 0.126 | 7   | 13.7 | Q2 |
| IPI00031556; | U2AF2   | 17.5 | 5.12E-117 | 0.126 | 11  | 14.4 | Q2 |
| IPI00641107; | CAPZB   | 46   | 1.76E-58  | 0.126 | 20  | 9.0  | Q2 |
| IPI00009737; | RRAGD   | 5.8  | 1.42E-04  | 0.127 | 2   | 7.7  | Q2 |
| IPI00646954; | ENAH    | 11.6 | 2.20E-11  | 0.127 | 12  | 20.9 | Q2 |
| IPI00216919; | YAP2    | 5.4  | 2.77E-02  | 0.128 | 3   | 74.6 | Q2 |

|              |        |      |           |       |    |       |    |
|--------------|--------|------|-----------|-------|----|-------|----|
| IPI00301364; | SKP1   | 16   | 6.42E-35  | 0.128 | 3  | 5.6   | Q2 |
| IPI00002460; | ANXA7  | 7.2  | 8.59E-10  | 0.128 | 3  | 83.0  | Q2 |
| IPI00002506; | ALG5   | 5.6  | 1.71E-09  | 0.129 | 2  | 9.0   | Q2 |
| IPI00019495; | DYNLT1 | 35.4 | 4.51E-34  | 0.130 | 3  | 7.7   | Q2 |
| IPI00026182; | CAPZA2 | 31.5 | 1.24E-58  | 0.130 | 9  | 55.1  | Q2 |
| IPI00003479; | MAPK1  | 38.3 | 4.18E-58  | 0.131 | 15 | 6.5   | Q2 |
| IPI00143753; | SR140  | 5.1  | 1.24E-53  | 0.131 | 6  | 9.1   | Q2 |
| IPI00915363; | RPS24  | 15.9 | 4.51E-49  | 0.131 | 8  | 13.5  | Q2 |
| IPI00008433; | RPS5   | 40.2 | 5.78E-133 | 0.131 | 13 | 68.8  | Q2 |
| IPI00872177; | PPP1CB | 26.4 | 1.80E-121 | 0.131 | 12 | 13.1  | Q2 |
| IPI00007909  | RABAC1 | 15.7 | 3.86E-15  | 0.132 | 2  | 18.2  | Q2 |
| IPI00873223; | UGP2   | 7.5  | 3.99E-15  | 0.132 | 4  | 10.0  | Q2 |
| IPI00013212; | CSK    | 4    | 5.31E-02  | 0.133 | 2  | 15.9  | Q2 |
| IPI00879750; | SNRPD3 | 22.9 | 5.95E-10  | 0.133 | 4  | 0.9   | Q2 |
| IPI00003519; | EFTUD2 | 31   | <1.0E-304 | 0.134 | 32 | 6.3   | Q2 |
| IPI00150269; | PRPF4  | 7.3  | 1.12E-45  | 0.134 | 3  | 6.3   | Q2 |
| IPI00329596; | TMX2   | 10   | 6.13E-10  | 0.135 | 4  | 23.8  | Q2 |
| IPI00010720; | CCT5   | 40.3 | 2.42E-119 | 0.135 | 32 | 25.5  | Q2 |
| IPI00013068; | EIF3E  | 10.3 | 2.52E-90  | 0.135 | 4  | 9.8   | Q2 |
| IPI00011253; | RPS3   | 75.3 | 1.53E-131 | 0.136 | 36 | 37.8  | Q2 |
| IPI00013917; | RPS12  | 56.8 | 2.83E-163 | 0.136 | 11 | 7.3   | Q2 |
| IPI00221092; | RPS16  | 39   | 7.79E-15  | 0.137 | 10 | 4.7   | Q2 |
| IPI00017963; | SNRPD2 | 39.8 | 9.11E-38  | 0.137 | 5  | 6.4   | Q2 |
| IPI00011937; | PRDX4  | 29.2 | 4.12E-114 | 0.138 | 11 | 41.0  | Q2 |
| IPI00016249; | FXR1   | 11.4 | 1.60E-13  | 0.138 | 9  | 5.1   | Q2 |
| IPI00102897  | RABL3  | 8.1  | 1.07E-04  | 0.138 | 2  | 10.4  | Q2 |
| IPI00002232  | TAOK1  | 3.7  | 1.36E-12  | 0.138 | 3  | 142.8 | Q2 |
| IPI00003965; | USP7   | 5.5  | 1.05E-22  | 0.140 | 7  | 11.6  | Q2 |
| IPI00002857; | MAPK14 | 9.2  | 1.09E-02  | 0.140 | 3  | 32.0  | Q2 |
| IPI00027626; | CCT6A  | 36.9 | 1.10E-194 | 0.141 | 32 | 12.0  | Q2 |
| IPI00005657; | PFDN6  | 23.3 | 9.53E-04  | 0.142 | 3  | 16.7  | Q2 |
| IPI00221089  | RPS13  | 36.4 | 2.26E-60  | 0.142 | 11 | 12.0  | Q2 |
| IPI00550021; | RPL3   | 24.8 | 4.75E-27  | 0.142 | 15 | 48.1  | Q2 |

|              |          |      |           |       |     |      |    |
|--------------|----------|------|-----------|-------|-----|------|----|
| IPI00894287; | HDLBP    | 1.4  | <1.0E-304 | 0.143 | 2   | 58.7 | Q2 |
| IPI00001676; | NPLOC4   | 11.8 | 6.70E-68  | 0.144 | 11  | 10.8 | Q2 |
| IPI00300127; | NAT10    | 10.8 | 4.47E-66  | 0.144 | 12  | 8.8  | Q2 |
| IPI00000494; | RPL5     | 40.4 | 1.67E-107 | 0.145 | 19  | 8.6  | Q2 |
| IPI00410162; | TCEB2    | 23   | 5.45E-05  | 0.145 | 6   | 17.0 | Q2 |
| IPI00887241; | RPS28    | 23.1 | 3.34E-21  | 0.146 | 3   | 4.2  | Q2 |
| IPI00216719; | ERC1     | 15.1 | 6.61E-92  | 0.147 | 16  | 14.2 | Q2 |
| IPI00014310; | CUL1     | 6.2  | 4.57E-28  | 0.148 | 5   | 12.3 | Q2 |
| IPI00917298; | RPL31    | 26.9 | 2.27E-33  | 0.148 | 6   | 5.1  | Q2 |
| IPI00333215; | TCEA1    | 15.6 | 4.89E-11  | 0.148 | 3   | 4.3  | Q2 |
| IPI00893743; | NRBP1    | 5.9  | 5.58E-13  | 0.148 | 3   | 1.3  | Q2 |
| IPI00879810; | SPTAN1   | 52.5 | <1.0E-304 | 0.149 | 197 | 59.7 | Q2 |
| IPI00554742; | API5     | 31   | 4.96E-81  | 0.149 | 14  | 10.0 | Q2 |
| IPI00012750; | RPS25    | 29.6 | 1.52E-16  | 0.150 | 5   | 2.4  | Q2 |
| IPI00015195; | CSTF3    | 13.8 | 9.65E-123 | 0.150 | 10  | 16.3 | Q2 |
| IPI00871932; | SPTBN1   | 39.5 | <1.0E-304 | 0.150 | 154 | 42.5 | Q2 |
| IPI00003269  | ACTBL2   | 4.8  | 1.26E-70  | 0.150 | 11  | 51.4 | Q2 |
| IPI00220154; | MYO5A    | 2.2  | 1.21E-12  | 0.150 | 3   | 6.7  | Q2 |
| IPI00479058; | RPS15    | 55.2 | 1.85E-73  | 0.151 | 9   | 13.5 | Q2 |
| IPI00217952; | GFPT1    | 32.6 | 3.39E-216 | 0.151 | 28  | 17.7 | Q2 |
| IPI00021417; | SART1    | 7    | 4.22E-10  | 0.151 | 5   | 3.4  | Q2 |
| IPI00027463  | S100A6   | 37.8 | 4.31E-58  | 0.151 | 5   | 9.4  | Q2 |
| IPI00397904; | NUP93    | 15   | 1.13E-40  | 0.151 | 12  | 15.9 | Q2 |
| IPI00290204; | SNRNP70  | 30.4 | 2.14E-28  | 0.152 | 14  | 20.3 | Q2 |
| IPI00016605; | C1orf123 | 10   | 5.47E-01  | 0.152 | 2   | 1.4  | Q2 |
| IPI00003783; | MAP2K2   | 7    | 8.83E-05  | 0.152 | 3   | 19.8 | Q2 |
| IPI00179438; | DAB2     | 12.5 | 5.45E-53  | 0.153 | 10  | 10.7 | Q2 |
| IPI00171844  | COPS4    | 22.4 | 5.88E-79  | 0.153 | 9   | 8.0  | Q2 |
| IPI00298406; | HADH     | 26.2 | 2.29E-50  | 0.154 | 11  | 6.9  | Q2 |
| IPI00219518; | ARL1     | 22.7 | 8.15E-24  | 0.154 | 4   | 4.3  | Q2 |
| IPI00430472; | ASCC3    | 2.5  | 1.17E-23  | 0.154 | 5   | 16.9 | Q2 |
| IPI00301419; | COPS7A   | 18.9 | 3.54E-25  | 0.154 | 4   | 3.5  | Q2 |
| IPI00026942; | ERLIN2   | 43.1 | 4.09E-109 | 0.154 | 12  | 16.6 | Q2 |

|              |          |      |           |       |    |      |    |
|--------------|----------|------|-----------|-------|----|------|----|
| IPI00215780; | RPS19    | 43.4 | 3.80E-34  | 0.154 | 10 | 8.6  | Q2 |
| IPI00003918; | RPL4     | 16.2 | 3.56E-19  | 0.155 | 15 | 31.4 | Q2 |
| IPI00922223; | ATP6V0D1 | 13.3 | 4.11E-32  | 0.155 | 4  | 4.4  | Q2 |
| IPI00008964; | RAB1B    | 63.7 | 5.63E-215 | 0.156 | 21 | 8.8  | Q2 |
| IPI00008918; | LIMA1    | 32.9 | 2.79E-155 | 0.156 | 33 | 24.2 | Q2 |
| IPI00182289; | RPS29    | 46.4 | 4.65E-06  | 0.156 | 3  | 11.6 | Q2 |
| IPI00291093  | POLR2E   | 23.8 | 2.15E-63  | 0.156 | 4  | 12.0 | Q2 |
| IPI00030275; | TRAP1    | 7.8  | 9.20E-47  | 0.156 | 7  | 5.5  | Q2 |
| IPI00014311; | CUL2     | 6.8  | 2.08E-10  | 0.156 | 6  | 6.9  | Q2 |
| IPI00307409  | MRPL9    | 8.2  | 4.34E-04  | 0.157 | 2  | 0.8  | Q2 |
| IPI00011996; | UBE2Z    | 5.9  | 1.14E-10  | 0.157 | 2  | 27.8 | Q2 |
| IPI00873222; | CCT4     | 52.3 | 1.93E-284 | 0.157 | 43 | 13.0 | Q2 |
| IPI00291006; | MDH2     | 51.2 | 2.26E-239 | 0.158 | 20 | 20.3 | Q2 |
| IPI00016910; | EIF3C    | 30.7 | 2.72E-257 | 0.159 | 37 | 11.5 | Q2 |
| IPI00217563; | ITGB1    | 25.9 | 5.30E-159 | 0.159 | 54 | 14.1 | Q2 |
| IPI00010706; | GSS      | 6.3  | 4.83E-09  | 0.159 | 3  | 6.1  | Q2 |
| IPI00011250; | UCHL3    | 31.3 | 2.06E-39  | 0.160 | 5  | 8.4  | Q2 |
| IPI00418497; | TIMM50   | 11.2 | 1.33E-32  | 0.160 | 4  | 10.3 | Q2 |
| IPI00376756; | HMGB3    | 13   | 2.31E-20  | 0.160 | 3  | 8.6  | Q2 |
| IPI00872664; | USP14    | 29.3 | 8.54E-99  | 0.161 | 17 | 9.7  | Q2 |
| IPI00657805; | XRN1     | 1.9  | 2.96E-09  | 0.161 | 3  | 18.4 | Q2 |
| IPI00007001; | MRPL11   | 15.1 | 1.95E-37  | 0.161 | 2  | 3.8  | Q2 |
| IPI00923468; | SMARCA4  | 4    | 5.07E-35  | 0.162 | 7  | 16.6 | Q2 |
| IPI00872359; | DCTN1    | 25.6 | 1.36E-229 | 0.162 | 40 | 15.1 | Q2 |
| IPI00025273; | GART     | 20.7 | 2.62E-120 | 0.163 | 23 | 43.7 | Q2 |
| IPI00654569; | CAMK2D   | 13.7 | 1.19E-31  | 0.163 | 7  | 9.1  | Q2 |
| IPI00290566; | CCT1     | 50.2 | 3.10E-273 | 0.163 | 36 | 6.0  | Q2 |
| IPI00003377; | SFRS7    | 21   | 2.46E-31  | 0.163 | 7  | 11.6 | Q2 |
| IPI00009057; | G3BP2    | 11.4 | 5.91E-35  | 0.164 | 5  | 8.0  | Q2 |
| IPI00215919; | ARF5     | 13.9 | 4.11E-32  | 0.164 | 3  | 31.5 | Q2 |
| IPI00296211; | DYM      | 2.5  | 1.73E-06  | 0.164 | 2  | 11.2 | Q2 |
| IPI00215719; | RPL18    | 34.6 | 1.61E-48  | 0.164 | 7  | 18.5 | Q2 |
| IPI00030255; | PLOD3    | 30.4 | 7.12E-96  | 0.165 | 26 | 10.7 | Q2 |

|              |          |      |           |       |    |      |    |
|--------------|----------|------|-----------|-------|----|------|----|
| IPI00221088; | RPS9     | 53.1 | 3.79E-22  | 0.165 | 33 | 25.1 | Q2 |
| IPI00553185; | CCT3     | 54.7 | 2.65E-279 | 0.167 | 41 | 20.1 | Q2 |
| IPI00641948; | FUBP1    | 14.3 | 3.65E-35  | 0.167 | 15 | 35.2 | Q2 |
| IPI00299254  | EIF5B    | 11.1 | 9.07E-185 | 0.167 | 14 | 15.6 | Q2 |
| IPI00218606; | RPS23    | 23.8 | 1.39E-15  | 0.168 | 6  | 10.7 | Q2 |
| IPI00026665; | QARS     | 24.8 | 1.29E-120 | 0.169 | 18 | 15.4 | Q2 |
| IPI00032038; | CPT1A    | 18.4 | 5.55E-46  | 0.169 | 15 | 19.8 | Q2 |
| IPI00328840; | THOC4    | 20.1 | 2.28E-87  | 0.169 | 4  | 5.7  | Q2 |
| IPI00646917; | NUDT21   | 35.7 | 3.37E-74  | 0.169 | 8  | 3.9  | Q2 |
| IPI00005537  | MRPL12   | 17.7 | 9.73E-21  | 0.169 | 3  | 7.5  | Q2 |
| IPI00027009; | PACSIN2  | 16.5 | 4.77E-24  | 0.169 | 11 | 5.0  | Q2 |
| IPI00784090; | CCT8     | 51.1 | 1.49E-200 | 0.170 | 40 | 13.2 | Q2 |
| IPI00554590; | RAB3GAP2 | 14.1 | 1.86E-78  | 0.170 | 20 | 17.2 | Q2 |
| IPI00029266; | SNRPE    | 12   | 6.99E-09  | 0.170 | 2  | 1.2  | Q2 |
| IPI00871815; | LNPEP    | 9.9  | 2.21E-37  | 0.170 | 12 | 8.1  | Q2 |
| IPI00028387; | DDRKG1   | 14   | 1.28E-59  | 0.171 | 4  | 7.7  | Q2 |
| IPI00549189; | THOP1    | 6.5  | 4.14E-09  | 0.171 | 6  | 11.8 | Q2 |
| IPI00419373; | HNRNPA3  | 31.2 | 7.45E-130 | 0.172 | 11 | 6.6  | Q2 |
| IPI00014053; | TOMM40   | 6.6  | 2.73E-05  | 0.172 | 3  | 13.4 | Q2 |
| IPI00719752; | EIF3B    | 22.2 | 9.10E-89  | 0.172 | 28 | 14.6 | Q2 |
| IPI00219217; | LDHB     | 60.8 | 4.72E-202 | 0.172 | 39 | 25.2 | Q2 |
| IPI00141561; | COG1     | 1.5  | 7.42E-02  | 0.172 | 2  | 0.5  | Q2 |
| IPI00297477; | SNRPA1   | 24.3 | 1.91E-59  | 0.173 | 8  | 6.0  | Q2 |
| IPI00026202; | RPL18A   | 31.8 | 3.02E-37  | 0.174 | 11 | 6.6  | Q2 |
| IPI00218343; | TUBA1C   | 3.8  | <1.0E-304 | 0.174 | 2  | 5.1  | Q2 |
| IPI00917629; | C2orf24  | 10.2 | 7.20E-02  | 0.174 | 2  | 39.0 | Q2 |
| IPI00409659; | UBQLN2   | 14.6 | 2.47E-61  | 0.174 | 10 | 10.1 | Q2 |
| IPI00069750; | PUF60    | 17.2 | 1.39E-35  | 0.175 | 9  | 7.1  | Q2 |
| IPI00294779; | VDAC3    | 21.1 | 2.60E-70  | 0.175 | 4  | 6.0  | Q2 |
| IPI00294158; | BLVRA    | 33.1 | 1.62E-31  | 0.175 | 7  | 8.8  | Q2 |
| IPI00377050; | COG5     | 1.6  | 1.35E-02  | 0.176 | 2  | 0.6  | Q2 |
| IPI00017448; | RPS21    | 63.9 | 7.87E-65  | 0.176 | 9  | 5.7  | Q2 |
| IPI00397366; | PPFIBP1  | 14.5 | 2.83E-83  | 0.176 | 15 | 7.0  | Q2 |

|              |           |      |           |       |    |      |    |
|--------------|-----------|------|-----------|-------|----|------|----|
| IPI00007102; | C17orf25  | 15.9 | 4.80E-22  | 0.178 | 8  | 10.8 | Q2 |
| IPI00004273; | RBM25     | 12.6 | 5.48E-14  | 0.180 | 9  | 8.0  | Q2 |
| IPI00456940; | RPL7L1    | 9.8  | 6.87E-09  | 0.181 | 3  | 14.7 | Q2 |
| IPI00604464; | UBE3C     | 8.5  | 3.16E-23  | 0.181 | 10 | 18.2 | Q2 |
| IPI00828189; | PCMT1     | 62.7 | 1.34E-140 | 0.181 | 14 | 75.8 | Q2 |
| IPI00019329  | DYNLL1    | 46.1 | 1.94E-15  | 0.181 | 5  | 5.4  | Q2 |
| IPI00396378; | HNRNPA2B1 | 51.6 | 1.12E-246 | 0.181 | 37 | 46.8 | Q2 |
| IPI00032533  | WDR18     | 4.6  | 1.35E-05  | 0.182 | 2  | 0.1  | Q2 |
| IPI00235412; | DNM1L     | 25.3 | 1.31E-154 | 0.182 | 21 | 21.3 | Q2 |
| IPI00646493; | COPA      | 46.7 | <1.0E-304 | 0.182 | 82 | 69.0 | Q2 |
| IPI00156689; | VAT1      | 43.8 | 4.59E-217 | 0.183 | 30 | 21.5 | Q2 |
| IPI00004968  | PRPF19    | 5.2  | 2.43E-07  | 0.183 | 2  | 14.8 | Q2 |
| IPI00456048; | COMMD2    | 15.6 | 4.07E-06  | 0.183 | 3  | 12.4 | Q2 |
| IPI00760846; | MYO18A    | 1.9  | 1.64E-04  | 0.183 | 5  | 15.1 | Q2 |
| IPI00005822; | CDC23     | 6.9  | 2.95E-23  | 0.184 | 4  | 22.2 | Q2 |
| IPI00014938; | SARNP     | 31.9 | 3.11E-74  | 0.185 | 6  | 5.8  | Q2 |
| IPI00398009; | IPO4      | 11.5 | 5.60E-121 | 0.185 | 13 | 38.4 | Q2 |
| IPI00744319; | PRRC1     | 4.7  | 8.48E-13  | 0.185 | 3  | 8.4  | Q2 |
| IPI00303207  | ABCE1     | 28.7 | 1.85E-129 | 0.185 | 15 | 4.5  | Q2 |
| IPI00872668; | NIT2      | 12.7 | 2.43E-46  | 0.186 | 4  | 8.2  | Q2 |
| IPI00025329; | RPL19     | 27   | 6.14E-69  | 0.187 | 10 | 7.4  | Q2 |
| IPI00916847; | OLA1      | 15.4 | 3.50E-39  | 0.187 | 6  | 8.5  | Q2 |
| IPI00472171; | RPL7      | 57.9 | 2.93E-96  | 0.188 | 24 | 6.6  | Q2 |
| IPI00395939; | PITPNB    | 18.3 | 3.44E-18  | 0.188 | 5  | 5.7  | Q2 |
| IPI00790214; | RCN2      | 9.3  | 8.27E-56  | 0.188 | 2  | 6.9  | Q2 |
| IPI00396630; | PRKACA    | 3.4  | 6.10E-21  | 0.191 | 2  | 0.2  | Q2 |
| IPI00386271; | SLC25A12  | 9.1  | 3.98E-70  | 0.191 | 7  | 40.0 | Q2 |
| IPI00243221; | NRD1      | 16.9 | 3.71E-103 | 0.192 | 22 | 6.0  | Q2 |
| IPI00410693; | SERBP1    | 7.1  | 8.64E-02  | 0.193 | 2  | 36.7 | Q2 |
| IPI00140420; | SND1      | 51.8 | <1.0E-304 | 0.193 | 92 | 12.0 | Q2 |
| IPI00554705; | DCTD      | 15.9 | 1.35E-09  | 0.193 | 4  | 9.5  | Q2 |
| IPI00013296; | RPS18     | 58.6 | 4.73E-45  | 0.193 | 19 | 7.4  | Q2 |
| IPI00298961; | XPO1      | 28.9 | 1.51E-184 | 0.193 | 57 | 15.6 | Q2 |

|              |           |      |           |       |    |      |    |
|--------------|-----------|------|-----------|-------|----|------|----|
| IPI00004668; | FUT8      | 5    | 1.93E-05  | 0.194 | 3  | 4.8  | Q2 |
| IPI00021808; | HARS      | 14.1 | 3.42E-29  | 0.194 | 8  | 6.9  | Q2 |
| IPI00215790; | RPL38     | 50   | 4.18E-32  | 0.195 | 7  | 6.9  | Q2 |
| IPI00015361; | PFDN5     | 42.9 | 2.54E-183 | 0.197 | 5  | 14.0 | Q2 |
| IPI00172580; | NUP54     | 8.7  | 5.47E-32  | 0.197 | 4  | 0.8  | Q2 |
| IPI00479786; | KHSRP     | 19   | 4.53E-71  | 0.197 | 24 | 47.8 | Q2 |
| IPI00000875; | EEF1G     | 17   | 1.66E-42  | 0.198 | 12 | 62.5 | Q2 |
| IPI00216730; | HIST2H2AB | 28.5 | 3.61E-66  | 0.199 | 6  | 10.0 | Q2 |
| IPI00376798; | RPL11     | 36.5 | 1.35E-38  | 0.199 | 9  | 8.5  | Q2 |
| IPI00641788; | SNRPC     | 6.7  | 3.26E-15  | 0.199 | 2  | 20.1 | Q2 |
| IPI00013415; | RPS7      | 45.4 | 1.19E-24  | 0.199 | 20 | 13.2 | Q2 |
| IPI00639841; | PECI      | 10.2 | 8.37E-19  | 0.199 | 4  | 6.3  | Q2 |
| IPI00028481; | RAB8A     | 19.8 | 1.31E-74  | 0.200 | 7  | 30.8 | Q2 |
| IPI00074587; | FUSIP1    | 14.9 | 3.90E-51  | 0.200 | 4  | 13.6 | Q2 |
| IPI00306604  | ITGA5     | 15.3 | 9.90E-135 | 0.200 | 13 | 8.4  | Q2 |
| IPI00003833  | MTCH2     | 30.7 | 1.04E-68  | 0.201 | 12 | 5.3  | Q2 |
| IPI00220754; | ADD3      | 13.2 | 2.39E-97  | 0.201 | 11 | 11.0 | Q2 |
| IPI00643166; | PGM3      | 21   | 1.47E-46  | 0.202 | 14 | 27.1 | Q2 |
| IPI00844578; | DHX9      | 39.8 | <1.0E-304 | 0.202 | 82 | 32.8 | Q2 |
| IPI00022774; | VCP       | 51.4 | <1.0E-304 | 0.202 | 93 | 26.5 | Q2 |
| IPI00220373; | IDE       | 6.3  | 1.25E-08  | 0.202 | 7  | 23.5 | Q2 |
| IPI00291467; | SLC25A6   | 48   | 8.56E-117 | 0.203 | 33 | 24.4 | Q2 |
| IPI00550308  | RBM12     | 2.7  | 1.05E-02  | 0.203 | 3  | 20.6 | Q2 |
| IPI00008527  | RPLP1     | 65.8 | 3.09E-127 | 0.203 | 4  | 5.7  | Q2 |
| IPI00005087  | TMOD3     | 11.9 | 8.32E-48  | 0.203 | 4  | 1.9  | Q2 |
| IPI00001639; | KPNB1     | 36.6 | <1.0E-304 | 0.203 | 63 | 33.3 | Q2 |
| IPI00163505; | RBM39     | 11.7 | 1.40E-87  | 0.204 | 6  | 5.9  | Q2 |
| IPI00015423; | MAP1LC3A  | 16.8 | 3.39E-03  | 0.205 | 2  | 7.0  | Q2 |
| IPI00549664; | TEX10     | 3.3  | 3.56E-18  | 0.205 | 2  | 3.5  | Q2 |
| IPI00033130; | SAE1      | 18.8 | 1.03E-09  | 0.205 | 5  | 5.5  | Q2 |
| IPI00549672; | PSMD13    | 27.9 | 7.55E-83  | 0.205 | 12 | 13.6 | Q2 |
| IPI00015018; | PPA1      | 41.5 | 5.10E-132 | 0.206 | 9  | 17.0 | Q2 |
| IPI00025366; | CS        | 6    | 2.38E-09  | 0.206 | 3  | 24.0 | Q2 |

|              |         |      |           |       |    |       |    |
|--------------|---------|------|-----------|-------|----|-------|----|
| IPI00019927  | PSMD7   | 34.6 | 1.90E-83  | 0.207 | 10 | 10.0  | Q2 |
| IPI00185919; | LARP1   | 11.9 | 8.85E-72  | 0.208 | 14 | 9.5   | Q2 |
| IPI00002525  | NENF    | 17.4 | 1.42E-03  | 0.208 | 3  | 3.5   | Q2 |
| IPI00027270; | RPL26   | 13.8 | 3.63E-15  | 0.208 | 4  | 10.4  | Q2 |
| IPI00514926; | GUK1    | 14.4 | 5.26E-06  | 0.208 | 2  | 7.1   | Q2 |
| IPI00006440  | MRPS7   | 10.7 | 2.12E-06  | 0.208 | 2  | 3.4   | Q2 |
| IPI00099550; | UBQLN1  | 9.2  | 4.21E-30  | 0.208 | 4  | 9.8   | Q2 |
| IPI00003923; | UMPS    | 4.2  | 7.35E-05  | 0.209 | 2  | 56.9  | Q2 |
| IPI00163230; | COPS6   | 8.3  | 9.50E-03  | 0.209 | 3  | 2.5   | Q2 |
| IPI00299024; | BASP1   | 46.3 | 9.18E-34  | 0.209 | 9  | 23.9  | Q2 |
| IPI00008868; | MAP1B   | 32.1 | <1.0E-304 | 0.209 | 94 | 63.7  | Q2 |
| IPI00872214; | TBCA    | 32.1 | 1.34E-33  | 0.210 | 6  | 15.4  | Q2 |
| IPI00749005; | SYNE1   | 0.9  | 1.95E-17  | 0.210 | 7  | 11.7  | Q2 |
| IPI00874235; | ERGIC1  | 20.2 | 5.08E-16  | 0.210 | 5  | 9.6   | Q2 |
| IPI00306933; | MYO9B   | 4.1  | 4.96E-28  | 0.210 | 8  | 14.1  | Q2 |
| IPI00171438; | TXNDC5  | 19   | 2.10E-56  | 0.210 | 11 | 20.3  | Q2 |
| IPI00784154; | HSPD1   | 56.2 | <1.0E-304 | 0.210 | 59 | 18.8  | Q2 |
| IPI00894498; | ACTB    | 4.5  | <1.0E-304 | 0.211 | 8  | 83.3  | Q2 |
| IPI00031397; | ACSL3   | 16.1 | 3.71E-120 | 0.211 | 12 | 6.1   | Q2 |
| IPI00301618; | SDCCAG1 | 5.4  | 3.93E-04  | 0.211 | 6  | 8.9   | Q2 |
| IPI00014151; | PSMD6   | 19   | 1.75E-23  | 0.214 | 8  | 10.6  | Q2 |
| IPI00012268; | PSMD2   | 31.7 | 3.83E-198 | 0.214 | 30 | 22.8  | Q2 |
| IPI00642374; | UCHL5   | 6.8  | 3.33E-06  | 0.215 | 2  | 9.1   | Q2 |
| IPI00025091; | RPS11   | 47.5 | 6.38E-34  | 0.215 | 11 | 5.1   | Q2 |
| IPI00024670; | REEP5   | 19.6 | 1.29E-17  | 0.216 | 5  | 14.4  | Q2 |
| IPI00910816; | SNW1    | 4.4  | 9.25E-02  | 0.216 | 2  | 8.6   | Q2 |
| IPI00337386; | PRPF40A | 6.8  | 3.62E-38  | 0.216 | 8  | 4.7   | Q2 |
| IPI00297579; | CBX3    | 33.3 | 7.93E-71  | 0.217 | 11 | 7.3   | Q2 |
| IPI00024976  | TOMM22  | 22.5 | 7.72E-60  | 0.217 | 4  | 8.9   | Q2 |
| IPI00640088; | CSNK2B  | 24.4 | 5.56E-28  | 0.218 | 5  | 10.3  | Q2 |
| IPI00093057  | CPOX    | 4.8  | 1.51E-16  | 0.218 | 2  | 5.8   | Q2 |
| IPI00158615; | THOC2   | 2.8  | 7.54E-42  | 0.219 | 6  | 179.5 | Q2 |
| IPI00298058; | SUPT5H  | 7.8  | 1.35E-29  | 0.219 | 7  | 11.5  | Q2 |



|              |         |      |           |       |    |       |    |
|--------------|---------|------|-----------|-------|----|-------|----|
| IPI00304612; | RPL13A  | 40.9 | 4.25E-56  | 0.220 | 11 | 12.3  | Q2 |
| IPI00644079; | HNRNPU  | 31.9 | 1.42E-147 | 0.220 | 63 | 9.8   | Q2 |
| IPI00465294; | CDC5L   | 5.9  | 2.26E-06  | 0.220 | 3  | 2.0   | Q2 |
| IPI00219861; | ACP1    | 14.6 | 2.14E-13  | 0.220 | 4  | 8.0   | Q2 |
| IPI00021831; | PRKAR1A | 14.7 | 3.75E-59  | 0.220 | 6  | 11.0  | Q2 |
| IPI00014149  | TTC35   | 10.4 | 9.72E-17  | 0.221 | 2  | 18.8  | Q2 |
| IPI00102962; | CNPY4   | 17.3 | 1.49E-20  | 0.222 | 3  | 14.0  | Q2 |
| IPI00419880; | RPS3A   | 61.4 | 3.26E-140 | 0.223 | 38 | 8.9   | Q2 |
| IPI00719725; | SAPS3   | 2.8  | 4.10E-04  | 0.223 | 2  | 6.2   | Q2 |
| IPI00100673; | VPS24   | 9.5  | 3.32E-16  | 0.224 | 2  | 6.7   | Q2 |
| IPI00294955  | LSM4    | 17.3 | 2.43E-13  | 0.225 | 4  | 30.9  | Q2 |
| IPI00022648  | EIF5    | 6.7  | 3.51E-05  | 0.225 | 3  | 2.1   | Q2 |
| IPI00647635; | GIGYF2  | 4.8  | 4.03E-29  | 0.227 | 5  | 24.3  | Q2 |
| IPI00747810; | FSCN1   | 27   | 1.23E-99  | 0.227 | 18 | 14.4  | Q2 |
| IPI00301323  | DDX18   | 5.4  | 7.00E-11  | 0.228 | 4  | 11.2  | Q2 |
| IPI00030702; | IDH3A   | 17.2 | 2.22E-17  | 0.228 | 6  | 27.4  | Q2 |
| IPI00003327  | ARL3    | 27.5 | 1.66E-19  | 0.229 | 4  | 5.3   | Q2 |
| IPI00419844; | USP39   | 7.6  | 1.63E-27  | 0.229 | 4  | 8.2   | Q2 |
| IPI00289357  | ULK1    | 0.7  | 1.39E-01  | 0.230 | 6  | 113.6 | Q2 |
| IPI00027988  | CTCF    | 2.5  | 2.15E-57  | 0.231 | 2  | 2.6   | Q2 |
| IPI00922415; | SSBP1   | 14.5 | 1.96E-41  | 0.231 | 3  | 6.0   | Q2 |
| IPI00374804  | DGKD    | 1    | 1.00E+00  | 0.232 | 2  | 1.8   | Q2 |
| IPI00221106; | SF3B2   | 23.8 | 1.14E-113 | 0.232 | 23 | 22.0  | Q2 |
| IPI00018465; | CCT7    | 52.3 | 7.46E-260 | 0.232 | 44 | 37.0  | Q2 |
| IPI00894417; | DASS    | 1.7  | 5.83E-03  | 0.232 | 2  | 17.0  | Q2 |
| IPI00010346; | NLN     | 4.1  | 1.47E-05  | 0.233 | 3  | 7.0   | Q2 |
| IPI00000728; | USP15   | 5.8  | 5.73E-25  | 0.233 | 5  | 9.8   | Q2 |
| IPI00173359; | UACA    | 5.8  | 7.01E-60  | 0.233 | 9  | 13.0  | Q2 |
| IPI00290460  | EIF3G   | 10   | 8.35E-38  | 0.234 | 3  | 9.2   | Q2 |
| IPI00016912  | TTC1    | 5.8  | 6.73E-03  | 0.235 | 2  | 0.8   | Q2 |
| IPI00022824; | SH3GLB1 | 18.4 | 1.62E-27  | 0.235 | 8  | 15.7  | Q2 |
| IPI00221300; | EIF2B1  | 14.4 | 6.20E-20  | 0.235 | 6  | 6.2   | Q2 |
| IPI00925656; | MRPS17  | 16.9 | 1.99E-10  | 0.237 | 2  | 8.5   | Q2 |

|              |               |      |           |       |     |      |    |
|--------------|---------------|------|-----------|-------|-----|------|----|
| IPI00297779; | CCT2          | 35   | 6.23E-173 | 0.237 | 27  | 14.0 | Q2 |
| IPI00329801; | ANXA5         | 81.9 | <1.0E-304 | 0.237 | 106 | 49.1 | Q2 |
| IPI00291200; | NUP133        | 15.6 | 2.04E-136 | 0.237 | 15  | 18.1 | Q2 |
| IPI00032561; | CAB39         | 9.7  | 6.75E-05  | 0.238 | 5   | 3.3  | Q2 |
| IPI00738765; | KIAA1949      | 2.8  | 3.14E-02  | 0.238 | 2   | 6.3  | Q2 |
| IPI00746351; | DIS3          | 7.1  | 1.06E-22  | 0.239 | 7   | 8.9  | Q2 |
| IPI00217553  | MRPL41        | 12.4 | 2.92E-04  | 0.239 | 2   | 8.0  | Q2 |
| IPI00021570; | EDF1          | 20.9 | 2.92E-06  | 0.239 | 3   | 13.0 | Q2 |
| IPI00397571; | NSFL1C        | 10.2 | 1.79E-31  | 0.240 | 3   | 2.4  | Q2 |
| IPI00012340; | SFRS9         | 24.9 | 9.95E-11  | 0.240 | 8   | 9.1  | Q2 |
| IPI00298928; | SHOC2         | 3.6  | 9.47E-20  | 0.241 | 2   | 6.8  | Q2 |
| IPI00395748; | ACOT7         | 17.6 | 4.14E-41  | 0.241 | 5   | 4.7  | Q2 |
| IPI00006052  | PFDN2         | 24   | 1.05E-30  | 0.241 | 5   | 8.5  | Q2 |
| IPI00152890; | NOL6          | 3.4  | 1.38E-04  | 0.242 | 3   | 7.8  | Q2 |
| IPI00514053; | ARCN1         | 38.6 | 1.55E-95  | 0.242 | 26  | 18.1 | Q2 |
| IPI00009236; | CAV1          | 43.8 | 2.79E-47  | 0.242 | 13  | 17.4 | Q2 |
| IPI00019385  | SSR4          | 12.5 | 4.94E-21  | 0.244 | 3   | 4.6  | Q2 |
| IPI00853598; | SEC13         | 13   | 2.66E-42  | 0.245 | 4   | 5.9  | Q2 |
| IPI00031768  | HOOK3         | 3.8  | 5.21E-44  | 0.248 | 5   | 10.2 | Q2 |
| IPI00026337; | RANBP3        | 7.6  | 1.43E-10  | 0.248 | 3   | 2.6  | Q2 |
| IPI00549248; | NPM1          | 44.2 | 2.38E-144 | 0.249 | 30  | 48.2 | Q2 |
| IPI00027252; | PHB2          | 49.8 | 3.17E-130 | 0.249 | 21  | 8.6  | Q2 |
| IPI00218466; | SEC61A1       | 25.5 | 2.94E-39  | 0.251 | 11  | 16.7 | Q2 |
| IPI00024364; | TNPO1         | 15.1 | 2.24E-39  | 0.251 | 12  | 10.5 | Q2 |
| IPI00009958; | COPS5         | 4.8  | 1.38E-02  | 0.252 | 2   | 3.1  | Q2 |
| IPI00296147; | TMEM119       | 11.3 | 6.40E-23  | 0.252 | 4   | 37.5 | Q2 |
| IPI00465432; | NOMO2         | 27.7 | 1.29E-162 | 0.253 | 32  | 8.7  | Q2 |
| IPI00000634; | CCDC6         | 8.4  | 1.66E-20  | 0.253 | 4   | 5.0  | Q2 |
| IPI00294879; | RANGAP1       | 29   | 1.43E-134 | 0.254 | 24  | 55.6 | Q2 |
| IPI00604620; | NCL           | 28.7 | 1.60E-269 | 0.255 | 43  | 41.0 | Q2 |
| IPI00296421  | EHBP1L1       | 2.2  | 9.74E-10  | 0.255 | 3   | 24.7 | Q2 |
| IPI00152695; | WDR82         | 8.6  | 1.41E-90  | 0.256 | 2   | 10.1 | Q2 |
| IPI00844264; | DKFZp779B0247 | 7.4  | 9.20E-15  | 0.256 | 9   | 7.5  | Q2 |

|              |          |      |           |       |     |       |    |
|--------------|----------|------|-----------|-------|-----|-------|----|
| IPI00164005; | COG7     | 3.5  | 1.87E-03  | 0.256 | 2   | 3.6   | Q2 |
| IPI00013485; | RPS2     | 35.5 | 4.77E-61  | 0.256 | 21  | 26.6  | Q2 |
| IPI00043598  | IKIP     | 15.1 | 3.08E-64  | 0.258 | 6   | 4.3   | Q2 |
| IPI00293026; | EFTUD1   | 8.9  | 1.91E-136 | 0.258 | 9   | 25.6  | Q2 |
| IPI00218448; | H2AFZ    | 18.8 | 4.07E-12  | 0.258 | 3   | 5.4   | Q2 |
| IPI00102069; | EIF3M    | 29.9 | 3.24E-105 | 0.259 | 10  | 10.1  | Q2 |
| IPI00173346  | PGM2L1   | 5    | 7.72E-04  | 0.259 | 3   | 102.5 | Q2 |
| IPI00221234; | ALDH7A1  | 13.7 | 7.16E-85  | 0.259 | 7   | 6.1   | Q2 |
| IPI00008569; | YKT6     | 28.8 | 2.23E-19  | 0.260 | 6   | 10.3  | Q2 |
| IPI00029764; | SF3A3    | 12.6 | 1.50E-36  | 0.260 | 8   | 3.2   | Q2 |
| IPI00479191; | HNRNPH1  | 26.1 | 4.87E-156 | 0.260 | 11  | 66.9  | Q2 |
| IPI00010860; | PSMD9    | 19.3 | 9.67E-16  | 0.261 | 5   | 4.8   | Q2 |
| IPI00008454; | DNAJB11  | 11.7 | 8.26E-64  | 0.262 | 5   | 14.7  | Q2 |
| IPI00218858; | MAP2K3   | 9.1  | 1.08E-19  | 0.263 | 3   | 3.7   | Q2 |
| IPI00413517; | ARHGEF10 | 2.4  | 3.44E-03  | 0.263 | 4   | 14.5  | Q2 |
| IPI00016342; | RAB7A    | 75.8 | 3.59E-225 | 0.264 | 33  | 10.7  | Q2 |
| IPI00396435  | DHX15    | 13.8 | 2.88E-38  | 0.264 | 17  | 46.0  | Q2 |
| IPI00159899; | ANKFY1   | 12.1 | 3.74E-62  | 0.265 | 14  | 5.6   | Q2 |
| IPI00007676  | HSD17B12 | 17.3 | 4.07E-44  | 0.266 | 6   | 4.9   | Q2 |
| IPI00056357  | C19orf10 | 12.1 | 3.66E-18  | 0.266 | 2   | 9.3   | Q2 |
| IPI00221222  | SUB1     | 31.5 | 3.27E-17  | 0.267 | 7   | 3.3   | Q2 |
| IPI00304742  | STK10    | 6.9  | 7.14E-123 | 0.267 | 5   | 7.1   | Q2 |
| IPI00298994; | TLN1     | 60.2 | <1.0E-304 | 0.267 | 349 | 65.8  | Q2 |
| IPI00010896; | CLIC1    | 65.1 | 2.90E-188 | 0.267 | 24  | 20.7  | Q2 |
| IPI00024934  | MUT      | 2.4  | 6.26E-02  | 0.268 | 2   | 1.4   | Q2 |
| IPI00009315  | ACBD3    | 27.5 | 2.93E-60  | 0.269 | 17  | 13.2  | Q2 |
| IPI00922443; | TBCE     | 4.5  | 4.40E-30  | 0.269 | 2   | 5.0   | Q2 |
| IPI00217272; | AACS     | 4.2  | 2.42E-03  | 0.270 | 3   | 3.9   | Q2 |
| IPI00028109; | DPY30    | 36.4 | 4.99E-34  | 0.270 | 3   | 7.4   | Q2 |
| IPI00004436; | LSM1     | 17.3 | 7.11E-23  | 0.270 | 2   | 2.2   | Q2 |
| IPI00289601; | HDAC2    | 9.3  | 2.01E-21  | 0.271 | 8   | 13.5  | Q2 |
| IPI00101037  | RCN3     | 24.7 | 1.03E-107 | 0.271 | 12  | 12.9  | Q2 |
| IPI00291608; | PCNP     | 19.7 | 1.04E-07  | 0.271 | 3   | 14.5  | Q2 |

|              |           |      |           |       |    |      |    |
|--------------|-----------|------|-----------|-------|----|------|----|
| IPI00029012  | EIF3A     | 34.3 | <1.0E-304 | 0.272 | 70 | 54.9 | Q2 |
| IPI00927682; | RAB3GAP1  | 17.6 | 1.47E-72  | 0.272 | 15 | 9.7  | Q2 |
| IPI00007084  | SLC25A13  | 20.7 | 4.09E-89  | 0.272 | 15 | 8.0  | Q2 |
| IPI00793443  | IPO5      | 38.9 | <1.0E-304 | 0.272 | 70 | 39.9 | Q2 |
| IPI00889196; | UQCRFSL1  | 13.4 | 1.08E-20  | 0.274 | 3  | 2.8  | Q2 |
| IPI00914048; | C11orf68  | 6.8  | 1.22E-02  | 0.274 | 2  | 8.5  | Q2 |
| IPI00034049; | UPF1      | 35.6 | 9.84E-204 | 0.276 | 41 | 8.2  | Q2 |
| IPI00477040; | NUP188    | 3.3  | 8.91E-11  | 0.277 | 6  | 27.5 | Q2 |
| IPI00911038  | MYH9      | 9.8  | 1.31E-58  | 0.277 | 10 | 17.1 | Q2 |
| IPI00008380; | PPP2CA    | 18.1 | 1.42E-74  | 0.278 | 6  | 9.2  | Q2 |
| IPI00014230; | C1QBP     | 26.2 | 8.75E-106 | 0.278 | 7  | 6.9  | Q2 |
| IPI00290142; | CTPS      | 21.7 | 3.89E-177 | 0.278 | 17 | 17.6 | Q2 |
| IPI00029731; | RPL35A    | 34.5 | 9.91E-03  | 0.279 | 7  | 8.1  | Q2 |
| IPI00107555; | PFN2      | 9    | 3.83E-04  | 0.279 | 2  | 9.1  | Q2 |
| IPI00031627  | POLR2A    | 1.3  | 9.95E-04  | 0.280 | 3  | 20.9 | Q2 |
| IPI00555647; | TRA2B     | 14.9 | 3.57E-33  | 0.280 | 4  | 17.0 | Q2 |
| IPI00655754; | UFD1L     | 14   | 6.40E-26  | 0.281 | 4  | 7.7  | Q2 |
| IPI00299033; | KPNA3     | 4.2  | 2.27E-45  | 0.281 | 3  | 5.0  | Q2 |
| IPI00032206; | PDLIM4    | 15.5 | 7.50E-14  | 0.282 | 5  | 12.7 | Q2 |
| IPI00031023; | FLII      | 18.4 | 7.77E-165 | 0.282 | 22 | 30.2 | Q2 |
| IPI00604590; | NME1-NME2 | 55.1 | 2.75E-199 | 0.283 | 27 | 8.0  | Q2 |
| IPI00217030; | RPS4X     | 53.2 | 2.47E-119 | 0.284 | 24 | 10.5 | Q2 |
| IPI00220007; | APOL2     | 10.6 | 7.18E-16  | 0.284 | 3  | 1.1  | Q2 |
| IPI00514275; | TNIK      | 2.9  | 4.38E-23  | 0.284 | 8  | 44.2 | Q2 |
| IPI00419258; | HMGB1     | 38.6 | 2.26E-150 | 0.285 | 19 | 6.9  | Q2 |
| IPI00883647; | IK        | 3.1  | 8.45E-03  | 0.285 | 2  | 16.8 | Q2 |
| IPI00029159  | MRE11A    | 9    | 1.61E-57  | 0.287 | 7  | 11.5 | Q2 |
| IPI00029468; | ACTR1A    | 27.4 | 5.66E-111 | 0.287 | 11 | 27.3 | Q2 |
| IPI00922855; | TUBGCP2   | 3.5  | 1.03E-21  | 0.287 | 3  | 1.0  | Q2 |
| IPI00400922  | PDCD11    | 4.6  | 9.77E-26  | 0.288 | 8  | 39.1 | Q2 |
| IPI00100106; | RIC8A     | 16.4 | 1.85E-49  | 0.289 | 9  | 34.0 | Q2 |
| IPI00107357; | CLPTM1    | 2.5  | 6.73E-03  | 0.289 | 2  | 13.8 | Q2 |
| IPI00409671; | DDX42     | 16.3 | 1.34E-29  | 0.290 | 14 | 15.5 | Q2 |

|              |           |      |           |       |    |      |    |
|--------------|-----------|------|-----------|-------|----|------|----|
| IPI00337397; | NUP98     | 1    | 2.40E-05  | 0.290 | 2  | 0.4  | Q2 |
| IPI00008530; | RPLP0     | 53.3 | 6.06E-245 | 0.291 | 22 | 25.3 | Q2 |
| IPI00328748; | ARMET     | 18.4 | 5.53E-14  | 0.291 | 7  | 21.9 | Q2 |
| IPI00376344; | MYO1B     | 33.9 | <1.0E-304 | 0.292 | 38 | 7.3  | Q2 |
| IPI00448798; | CSNK1A1   | 11.8 | 1.19E-15  | 0.292 | 3  | 2.8  | Q2 |
| IPI00456630; | FNDC3A    | 4.3  | 1.65E-15  | 0.294 | 4  | 11.4 | Q2 |
| IPI00796891; | GOLGB1    | 3    | 2.70E-97  | 0.295 | 7  | 13.4 | Q2 |
| IPI00021370; | UBE2K     | 20   | 7.20E-27  | 0.295 | 3  | 1.2  | Q2 |
| IPI00031836; | DRG1      | 20.2 | 3.51E-40  | 0.296 | 5  | 7.5  | Q2 |
| IPI00219097  | HMGB2     | 19.6 | 1.50E-41  | 0.296 | 8  | 7.5  | Q2 |
| IPI00005861; | PRPF3     | 2.5  | 2.58E-02  | 0.297 | 2  | 9.0  | Q2 |
| IPI00291928; | RAB14     | 53   | 6.44E-75  | 0.298 | 13 | 11.5 | Q2 |
| IPI00878611; | RANBP1    | 25.4 | 6.17E-19  | 0.299 | 5  | 5.7  | Q2 |
| IPI00413895; | GOLGA2    | 7.3  | 1.48E-29  | 0.299 | 7  | 8.5  | Q2 |
| IPI00294891; | NOP2      | 8.1  | 1.97E-64  | 0.300 | 6  | 25.3 | Q2 |
| IPI00289499; | ATIC      | 51.9 | 2.02E-258 | 0.300 | 29 | 18.1 | Q2 |
| IPI00220416; | UQCRB     | 27   | 7.00E-30  | 0.300 | 3  | 14.5 | Q2 |
| IPI00005490; | GOLPH3    | 9.7  | 4.73E-25  | 0.302 | 3  | 16.5 | Q2 |
| IPI00219420  | SMC3      | 26.5 | 2.46E-110 | 0.302 | 31 | 22.0 | Q2 |
| IPI00644674; | NUBP2     | 8.5  | 1.42E-07  | 0.303 | 2  | 0.9  | Q2 |
| IPI00013122  | CDC37     | 17.5 | 3.13E-47  | 0.306 | 6  | 8.7  | Q2 |
| IPI00184546  | C12orf23  | 38.8 | 1.63E-32  | 0.307 | 4  | 8.3  | Q2 |
| IPI00395887; | TMX1      | 16.8 | 3.32E-40  | 0.308 | 6  | 2.9  | Q2 |
| IPI00397229; | CD97      | 3.4  | 4.52E-03  | 0.310 | 2  | 4.4  | Q2 |
| IPI00072534; | UNC45A    | 4.9  | 2.33E-18  | 0.310 | 4  | 11.8 | Q2 |
| IPI00220628; | AKAP9     | 0.6  | 1.00E-02  | 0.310 | 3  | 5.1  | Q2 |
| IPI00032342; | TRIP12    | 1.2  | 2.90E-29  | 0.310 | 2  | 19.8 | Q2 |
| IPI00647650; | EIF3H     | 21.9 | 5.78E-20  | 0.311 | 8  | 9.3  | Q2 |
| IPI00215918; | ARF4      | 35.6 | 5.44E-99  | 0.311 | 10 | 3.7  | Q2 |
| IPI00890743; | PPP6C     | 15.5 | 2.39E-19  | 0.311 | 5  | 19.2 | Q2 |
| IPI00871176; | NIPSNAP3A | 19.1 | 6.73E-13  | 0.312 | 6  | 8.5  | Q2 |
| IPI00009235  | SSR3      | 7.1  | 1.42E-15  | 0.312 | 2  | 0.1  | Q2 |
| IPI00005613; | U2AF1     | 21.2 | 1.63E-50  | 0.313 | 5  | 7.9  | Q2 |

|              |                |      |           |       |    |       |    |
|--------------|----------------|------|-----------|-------|----|-------|----|
| IPI00062120  | S100A16        | 26.2 | 5.40E-44  | 0.316 | 3  | 5.2   | Q2 |
| IPI00024320; | RBM3           | 41.4 | 2.53E-55  | 0.316 | 4  | 7.2   | Q2 |
| IPI00009328  | EIF4A3         | 9    | 3.51E-36  | 0.317 | 4  | 11.1  | Q2 |
| IPI00305383  | UQCRC2         | 25.8 | 1.13E-117 | 0.317 | 11 | 19.4  | Q2 |
| IPI00429191  | ETF1           | 11.9 | 1.39E-44  | 0.320 | 6  | 8.1   | Q2 |
| IPI00299084  | TMEM33         | 8.5  | 2.96E-18  | 0.320 | 3  | 10.8  | Q2 |
| IPI00644708; | TIAL1          | 10.2 | 1.46E-09  | 0.321 | 5  | 7.9   | Q2 |
| IPI00844214; | CTNBL1         | 4.6  | 5.07E-03  | 0.322 | 3  | 3.6   | Q2 |
| IPI00151462; | MAP1LC3B2      | 11.2 | 3.77E-02  | 0.323 | 2  | 4.0   | Q2 |
| IPI00026271  | RPS14          | 32.5 | 1.05E-32  | 0.323 | 6  | 8.4   | Q2 |
| IPI00012442; | G3BP1          | 21.9 | 3.54E-73  | 0.324 | 12 | 9.1   | Q2 |
| IPI00003438  | DNAJC8         | 17.4 | 6.01E-04  | 0.324 | 4  | 9.4   | Q2 |
| IPI00418169; | DKFZp686P03159 | 74.2 | <1.0E-304 | 0.325 | 92 | 40.5  | Q2 |
| IPI00175096; | TTC9C          | 8.8  | 4.84E-02  | 0.325 | 2  | 6.1   | Q2 |
| IPI00020075  | ABHD10         | 15.7 | 2.22E-49  | 0.326 | 3  | 9.5   | Q2 |
| IPI00002149  | SAR1B          | 11.6 | 6.36E-24  | 0.326 | 3  | 20.9  | Q2 |
| IPI00879742  | ARFGAP3        | 17.8 | 5.81E-70  | 0.327 | 7  | 101.8 | Q2 |
| IPI00014456; | STRN           | 4.4  | 2.77E-04  | 0.327 | 4  | 15.5  | Q2 |
| IPI00329385; | MTMR6          | 4.2  | 5.83E-03  | 0.327 | 2  | 17.8  | Q2 |
| IPI00013949; | SGTA           | 18.5 | 2.62E-54  | 0.327 | 5  | 23.9  | Q2 |
| IPI00218493; | HPRT1          | 27.5 | 2.72E-50  | 0.328 | 5  | 7.9   | Q2 |
| IPI00017367; | RDX            | 23   | 1.51E-96  | 0.328 | 11 | 10.2  | Q2 |
| IPI00513853; | STX12          | 24.7 | 6.33E-82  | 0.328 | 6  | 12.4  | Q2 |
| IPI00513761; | RP3            | 15   | 1.38E-27  | 0.330 | 4  | 8.5   | Q2 |
| IPI00016613; | CSNK2A1        | 10.3 | 1.43E-09  | 0.330 | 3  | 2.7   | Q2 |
| IPI00220158; | ADD1           | 12.9 | 2.91E-85  | 0.331 | 13 | 8.9   | Q2 |
| IPI00410215; | BPNT1          | 5.8  | 8.88E-10  | 0.332 | 2  | 3.2   | Q2 |
| IPI00019169; | SH3GL1         | 7.6  | 1.41E-06  | 0.332 | 3  | 10.4  | Q2 |
| IPI00329696; | FAM82B         | 12.7 | 2.99E-16  | 0.334 | 4  | 15.4  | Q2 |
| IPI00292020  | SRM            | 27.2 | 1.75E-48  | 0.334 | 7  | 44.7  | Q2 |
| IPI00185146  | IPO9           | 23.3 | 1.61E-175 | 0.335 | 28 | 41.4  | Q2 |
| IPI00465160; | ABCF3          | 3    | 1.57E-17  | 0.335 | 2  | 13.0  | Q2 |
| IPI00005104; | CHUK           | 2.3  | 1.31E-01  | 0.336 | 2  | 25.8  | Q2 |

|              |          |      |           |       |     |      |    |
|--------------|----------|------|-----------|-------|-----|------|----|
| IPI00783982; | COPG     | 38.1 | <1.0E-304 | 0.337 | 49  | 64.8 | Q2 |
| IPI00291783  | GEMIN5   | 1.7  | 2.69E-04  | 0.340 | 4   | 2.5  | Q2 |
| IPI00029264  | CYC1     | 8.6  | 1.90E-13  | 0.340 | 2   | 2.4  | Q2 |
| IPI00382470; | HSP90AA1 | 46.7 | <1.0E-304 | 0.341 | 125 | 34.9 | Q2 |
| IPI00001159; | GCN1L1   | 30.7 | <1.0E-304 | 0.341 | 121 | 27.2 | Q2 |
| IPI00386189; | NARG1    | 5.2  | 6.34E-12  | 0.342 | 5   | 5.8  | Q2 |
| IPI00009949; | PSMF1    | 12.9 | 1.46E-31  | 0.343 | 4   | 11.4 | Q2 |
| IPI00022254; | ATG3     | 19.1 | 2.80E-45  | 0.344 | 5   | 7.5  | Q2 |
| IPI00401264  | ERP44    | 10.8 | 6.17E-29  | 0.344 | 5   | 30.1 | Q2 |
| IPI00017469; | SPR      | 21.1 | 1.77E-121 | 0.345 | 4   | 10.4 | Q2 |
| IPI00008728  | CLPX     | 11.5 | 5.16E-29  | 0.346 | 6   | 5.6  | Q2 |
| IPI00013721; | PRPF4B   | 3.8  | 1.94E-34  | 0.347 | 3   | 95.5 | Q2 |
| IPI00007755  | RAB21    | 17.3 | 1.21E-78  | 0.347 | 4   | 12.4 | Q2 |
| IPI00015956; | EXOSC3   | 8    | 9.36E-04  | 0.348 | 2   | 32.3 | Q2 |
| IPI00025721; | COPS3    | 10.6 | 2.18E-28  | 0.348 | 3   | 9.0  | Q2 |
| IPI00641990; | LAS1L    | 4.2  | 7.03E-52  | 0.349 | 2   | 5.0  | Q2 |
| IPI00015947; | DNAJB1   | 10   | 2.71E-03  | 0.349 | 3   | 1.6  | Q2 |
| IPI00003870  | CLPP     | 13.7 | 2.48E-54  | 0.350 | 3   | 4.9  | Q2 |
| IPI00221235; | NUP160   | 7    | 6.54E-60  | 0.352 | 10  | 7.9  | Q2 |
| IPI00219678; | EIF2S1   | 16.5 | 2.01E-20  | 0.352 | 6   | 4.9  | Q2 |
| IPI00001661; | RCC1     | 5.3  | 2.15E-03  | 0.352 | 3   | 8.1  | Q2 |
| IPI00216592; | HNRNPC   | 46.1 | 1.36E-142 | 0.353 | 28  | 33.5 | Q2 |
| IPI00012795  | EIF3I    | 17.5 | 2.14E-14  | 0.353 | 5   | 6.2  | Q2 |
| IPI00022462; | TFRC     | 27   | 8.16E-170 | 0.354 | 39  | 52.2 | Q2 |
| IPI00014898; | PLEC1    | 58.6 | <1.0E-304 | 0.354 | 541 | 69.3 | Q2 |
| IPI00014898; | PLEC1    | 58.6 | <1.0E-304 | 0.354 | 541 | 69.3 | Q2 |
| IPI00644712; | XRCC6    | 51.7 | <1.0E-304 | 0.354 | 57  | 15.7 | Q2 |
| IPI00029723; | FSTL1    | 9.1  | 2.89E-13  | 0.356 | 4   | 25.3 | Q2 |
| IPI00303292; | KPNA1    | 8.6  | 4.18E-22  | 0.356 | 4   | 16.8 | Q2 |
| IPI00029737; | ACSL4    | 11.4 | 6.15E-81  | 0.356 | 8   | 12.1 | Q2 |
| IPI00028083  | EIF2B2   | 5.1  | 1.01E-46  | 0.357 | 2   | 3.3  | Q2 |
| IPI00032460; | LSM2     | 35.8 | 8.84E-82  | 0.357 | 4   | 7.3  | Q2 |
| IPI00006715; | RAD21    | 3.3  | 4.96E-04  | 0.359 | 2   | 13.1 | Q2 |

|              |          |      |           |       |    |      |    |
|--------------|----------|------|-----------|-------|----|------|----|
| IPI00220219; | COPB2    | 29.7 | 6.53E-125 | 0.360 | 35 | 59.1 | Q2 |
| IPI00016610  | PCBP1    | 38.8 | 8.48E-101 | 0.360 | 14 | 20.6 | Q2 |
| IPI00218342  | MTHFD1   | 2.7  | 1.10E-293 | 0.360 | 2  | 11.7 | Q2 |
| IPI00294536; | STRAP    | 33.9 | 1.39E-107 | 0.361 | 11 | 19.6 | Q2 |
| IPI00220362; | HSPE1    | 62.7 | 7.97E-71  | 0.361 | 11 | 5.1  | Q2 |
| IPI00789551; | MATR3    | 30.9 | 1.31E-179 | 0.361 | 46 | 15.9 | Q2 |
| IPI00026089; | SF3B1    | 27.1 | 2.74E-253 | 0.362 | 33 | 12.4 | Q2 |
| IPI00790530; | NUP85    | 5    | 1.76E-15  | 0.363 | 2  | 5.2  | Q2 |
| IPI00171412; | SUMF2    | 25.9 | 4.28E-33  | 0.364 | 10 | 7.8  | Q2 |
| IPI00796337; | PCBP2    | 21   | 1.77E-108 | 0.365 | 6  | 21.1 | Q2 |
| IPI00641950; | GNB2L1   | 63.6 | 1.72E-185 | 0.366 | 32 | 25.5 | Q2 |
| IPI00855820; | MON2     | 2.1  | 1.52E-08  | 0.367 | 5  | 25.4 | Q2 |
| IPI00396321  | LRRC59   | 36.2 | 3.53E-134 | 0.370 | 16 | 37.4 | Q2 |
| IPI00168388; | SRP68    | 26.3 | 9.54E-62  | 0.370 | 15 | 32.1 | Q2 |
| IPI00642032; | TXNL1    | 16.3 | 1.58E-54  | 0.372 | 6  | 4.8  | Q2 |
| IPI00000792; | CRYZ     | 13.4 | 3.24E-13  | 0.372 | 4  | 86.8 | Q2 |
| IPI00015102; | ALCAM    | 19.9 | 1.12E-43  | 0.373 | 9  | 11.3 | Q2 |
| IPI00927614; | GOLGA4   | 4.3  | 2.50E-31  | 0.374 | 9  | 7.6  | Q2 |
| IPI00784119; | ATP6AP1  | 6.4  | 7.32E-07  | 0.375 | 3  | 13.7 | Q2 |
| IPI00009542; | MAGED2   | 3.3  | 1.07E-04  | 0.376 | 2  | 7.1  | Q2 |
| IPI00005978; | SFRS2    | 16.7 | 5.88E-07  | 0.376 | 6  | 43.2 | Q2 |
| IPI00292771; | NUMA1    | 24.5 | <1.0E-304 | 0.378 | 42 | 22.1 | Q2 |
| IPI00013862; | DTYMK    | 17.9 | 2.79E-12  | 0.379 | 5  | 5.8  | Q2 |
| IPI00004669; | GALNT2   | 21.4 | 1.77E-128 | 0.379 | 11 | 6.9  | Q2 |
| IPI00031169; | RAB2A    | 58   | 3.04E-124 | 0.380 | 21 | 10.1 | Q2 |
| IPI00301936; | ELAVL1   | 22.1 | 4.40E-83  | 0.382 | 9  | 8.3  | Q2 |
| IPI00639925; | XPO6     | 1.8  | 1.43E-11  | 0.384 | 2  | 28.4 | Q2 |
| IPI00329662; | FAM114A2 | 6.5  | 6.12E-02  | 0.384 | 3  | 19.4 | Q2 |
| IPI00220827  | TMSB10   | 31.8 | 1.42E-15  | 0.384 | 2  | 4.4  | Q2 |
| IPI00794221; | DBN1     | 22.3 | 1.38E-81  | 0.385 | 16 | 15.2 | Q2 |
| IPI00013872; | KDELR3   | 7.9  | 1.73E-04  | 0.385 | 4  | 24.7 | Q2 |
| IPI00215965; | HNRNPA1  | 35.2 | 1.44E-217 | 0.386 | 21 | 18.9 | Q2 |
| IPI00394668; | ADAR     | 6.5  | 1.73E-36  | 0.388 | 12 | 23.2 | Q2 |



|              |         |      |           |       |    |      |    |
|--------------|---------|------|-----------|-------|----|------|----|
| IPI00029557; | GRPEL1  | 14.3 | 1.82E-14  | 0.390 | 4  | 5.1  | Q2 |
| IPI00216654; | NOLC1   | 6.3  | 5.85E-07  | 0.390 | 6  | 4.6  | Q2 |
| IPI00847689; | HTATIP2 | 11.6 | 1.59E-06  | 0.390 | 2  | 57.5 | Q2 |
| IPI00240812; | PDS5B   | 3.9  | 9.75E-04  | 0.392 | 6  | 6.0  | Q2 |
| IPI00215613  | ITGA11  | 1.8  | 1.84E-02  | 0.392 | 2  | 23.2 | Q2 |
| IPI00384643; | TP53I3  | 12.3 | 3.18E-24  | 0.392 | 4  | 5.2  | Q2 |
| IPI00028122; | PSIP1   | 3.8  | 3.04E-03  | 0.393 | 3  | 10.4 | Q2 |
| IPI00856008; | HIGD1A  | 20.6 | 1.71E-17  | 0.394 | 2  | 17.0 | Q2 |
| IPI00386258; | MTCH1   | 5.4  | 1.98E-14  | 0.394 | 2  | 13.8 | Q2 |
| IPI00217950; | HMG2    | 30   | 1.06E-02  | 0.395 | 3  | 13.0 | Q2 |
| IPI00647217; | SKIV2L2 | 12.3 | 7.63E-64  | 0.395 | 13 | 10.7 | Q2 |
| IPI00333770; | DOCK10  | 1.8  | 9.78E-04  | 0.397 | 4  | 4.9  | Q2 |
| IPI00306369  | NSUN2   | 8.3  | 5.61E-66  | 0.397 | 4  | 5.6  | Q2 |
| IPI00828150; | SUGT1   | 9.3  | 1.76E-17  | 0.397 | 3  | 12.4 | Q2 |
| IPI00413108; | RPSA    | 47.3 | 1.23E-154 | 0.397 | 23 | 48.6 | Q2 |
| IPI00921422; | CKAP5   | 14.6 | 8.39E-131 | 0.398 | 29 | 41.1 | Q2 |
| IPI00103483  | COBRA1  | 5.9  | 8.03E-08  | 0.400 | 3  | 5.6  | Q2 |
| IPI00218475; | IFI35   | 11.8 | 4.01E-04  | 0.400 | 5  | 18.1 | Q2 |
| IPI00011274; | HNRPD   | 5    | 1.00E-07  | 0.400 | 2  | 3.4  | Q2 |
| IPI00412492; | PLXND1  | 3.6  | 1.10E-07  | 0.401 | 7  | 45.6 | Q2 |
| IPI00032970; | OSBPL11 | 3.1  | 6.26E-02  | 0.401 | 2  | 21.0 | Q2 |
| IPI00024279; | HEATR1  | 4.9  | 9.95E-23  | 0.402 | 10 | 10.2 | Q2 |
| IPI00003704; | RBM4    | 7.1  | 3.57E-04  | 0.403 | 3  | 8.1  | Q2 |
| IPI00220834; | XRCC5   | 46   | <1.0E-304 | 0.403 | 85 | 32.6 | Q2 |
| IPI00295851  | COPB1   | 28   | 1.44E-219 | 0.404 | 43 | 16.3 | Q2 |
| IPI00291946  | USP10   | 3    | 2.71E-07  | 0.404 | 2  | 5.8  | Q2 |
| IPI00002564; | XRCC1   | 3.6  | 4.12E-03  | 0.405 | 2  | 1.5  | Q2 |
| IPI00295098; | SRPRB   | 32.1 | 8.18E-94  | 0.407 | 8  | 8.6  | Q2 |
| IPI00291695; | GPX8    | 49.3 | 6.98E-26  | 0.408 | 8  | 8.6  | Q2 |
| IPI00022827; | SLK     | 10.4 | 9.17E-66  | 0.410 | 13 | 9.8  | Q2 |
| IPI00030320  | DDX6    | 8.5  | 2.29E-22  | 0.411 | 3  | 6.0  | Q2 |
| IPI00909083; | GSPT1   | 23.6 | 9.27E-19  | 0.411 | 16 | 61.4 | Q2 |
| IPI00784013  | JAK1    | 3.4  | 1.10E-18  | 0.412 | 3  | 7.0  | Q2 |

|              |         |      |           |       |     |      |    |
|--------------|---------|------|-----------|-------|-----|------|----|
| IPI00054042; | GTF2I   | 24   | 7.13E-76  | 0.412 | 20  | 11.7 | Q2 |
| IPI00413696; | CD47    | 4.9  | 1.44E-01  | 0.413 | 7   | 24.9 | Q2 |
| IPI00023640; | PDCD5   | 36.8 | 1.26E-41  | 0.414 | 5   | 11.1 | Q2 |
| IPI00640817; | AK1     | 28.1 | 2.18E-57  | 0.416 | 19  | 9.1  | Q2 |
| IPI00030706  | AHSA1   | 13.9 | 1.35E-19  | 0.416 | 4   | 9.8  | Q2 |
| IPI00465044  | RCC2    | 7.1  | 7.74E-16  | 0.416 | 4   | 5.0  | Q2 |
| IPI00007188; | SLC25A5 | 19.5 | 2.59E-95  | 0.417 | 9   | 10.7 | Q2 |
| IPI00792352; | RAN     | 43.2 | 4.48E-70  | 0.418 | 19  | 53.9 | Q2 |
| IPI00014572  | SPARC   | 15.5 | 8.20E-09  | 0.418 | 5   | 7.0  | Q2 |
| IPI00026262; | RASA1   | 10.9 | 1.98E-79  | 0.419 | 10  | 9.4  | Q2 |
| IPI00003865; | HSPA8   | 62.7 | <1.0E-304 | 0.419 | 129 | 38.3 | Q2 |
| IPI00218918; | ANXA1   | 74.9 | <1.0E-304 | 0.420 | 53  | 25.3 | Q2 |
| IPI00009368  | SFXN1   | 19.3 | 6.13E-44  | 0.420 | 3   | 6.8  | Q2 |
| IPI00654605; | MAP7D1  | 8.6  | 1.36E-58  | 0.420 | 8   | 10.7 | Q2 |
| IPI00021327; | GRB2    | 22.6 | 3.90E-16  | 0.420 | 5   | 7.1  | Q2 |
| IPI00216694; | PLS3    | 59.4 | <1.0E-304 | 0.423 | 83  | 25.9 | Q2 |
| IPI00337460; | KLC1    | 19.4 | 1.23E-50  | 0.423 | 17  | 11.2 | Q2 |
| IPI00797126; | NACA    | 6.7  | 2.72E-103 | 0.425 | 9   | 19.6 | Q2 |
| IPI00375144; | SRRT    | 12.4 | 1.32E-28  | 0.426 | 11  | 10.5 | Q2 |
| IPI00012837; | KIF5B   | 52.5 | <1.0E-304 | 0.427 | 60  | 11.6 | Q2 |
| IPI00296432; | IWS1    | 4.6  | 3.44E-56  | 0.428 | 3   | 4.6  | Q2 |
| IPI00645702  | CTPS2   | 7    | 7.16E-29  | 0.428 | 4   | 15.5 | Q2 |
| IPI00910170; | RAB3A   | 16.1 | 7.13E-53  | 0.430 | 3   | 1.5  | Q2 |
| IPI00003768; | PES1    | 14.5 | 2.85E-16  | 0.433 | 10  | 7.1  | Q2 |
| IPI00289334; | FLNB    | 45.8 | <1.0E-304 | 0.435 | 182 | 84.9 | Q2 |
| IPI00005154; | SSRP1   | 23.3 | 2.75E-110 | 0.435 | 18  | 7.9  | Q2 |
| IPI00929344; | PFAS    | 8.4  | 1.35E-66  | 0.441 | 9   | 10.4 | Q2 |
| IPI00412157; | PPME1   | 5    | 1.52E-04  | 0.441 | 2   | 10.1 | Q2 |
| IPI00029111; | LCRMP   | 37.7 | 1.33E-191 | 0.441 | 40  | 39.9 | Q2 |
| IPI00009253; | NAPA    | 31.9 | 1.35E-104 | 0.442 | 13  | 10.0 | Q2 |
| IPI00874185; | HIBCH   | 4.3  | 3.66E-06  | 0.444 | 2   | 10.2 | Q2 |
| IPI00007928; | PRPF8   | 28.4 | 5.09E-289 | 0.447 | 71  | 15.9 | Q2 |
| IPI00013877; | HNRNPH3 | 25.1 | 1.34E-58  | 0.448 | 11  | 6.6  | Q2 |

|              |          |      |           |       |     |      |    |
|--------------|----------|------|-----------|-------|-----|------|----|
| IPI00413293; | TOR1A    | 4.1  | 1.67E-26  | 0.450 | 2   | 14.9 | Q2 |
| IPI00329629; | DNAJC7   | 11.9 | 8.68E-23  | 0.450 | 5   | 11.0 | Q2 |
| IPI00171798  | MTA2     | 7.3  | 1.27E-13  | 0.450 | 4   | 7.6  | Q2 |
| IPI00174442; | FAM98A   | 12.5 | 1.16E-77  | 0.451 | 5   | 8.9  | Q2 |
| IPI00018627; | NAT13    | 20.7 | 2.94E-21  | 0.452 | 3   | 11.4 | Q2 |
| IPI00168262; | GLT25D1  | 19.9 | 3.82E-53  | 0.453 | 22  | 18.1 | Q2 |
| IPI00465132; | COPE     | 31.8 | 2.01E-70  | 0.454 | 8   | 41.6 | Q2 |
| IPI00828080; | ARAP1    | 3.2  | 3.38E-29  | 0.455 | 4   | 5.1  | Q2 |
| IPI00015954; | SAR1A    | 48   | 2.70E-45  | 0.456 | 10  | 33.5 | Q2 |
| IPI00642126; | KIAA1618 | 5.3  | 1.77E-125 | 0.458 | 22  | 24.1 | Q2 |
| IPI00024067; | CLTC     | 63   | <1.0E-304 | 0.459 | 239 | 55.0 | Q2 |
| IPI00910194; | NUP153   | 7.8  | 4.42E-35  | 0.459 | 9   | 18.8 | Q2 |
| IPI00020124; | PI4K2A   | 3.5  | 1.17E-04  | 0.460 | 2   | 8.6  | Q2 |
| IPI00215687; | GLS      | 3    | 1.34E-55  | 0.460 | 2   | 34.3 | Q2 |
| IPI00217223; | PAICS    | 18   | 3.51E-17  | 0.460 | 5   | 9.9  | Q2 |
| IPI00246975; | GSTM3    | 44.9 | 2.62E-64  | 0.462 | 10  | 22.3 | Q2 |
| IPI00305267; | GOLGA3   | 20.8 | 9.60E-212 | 0.463 | 29  | 34.6 | Q2 |
| IPI00032313  | S100A4   | 45.5 | 7.47E-12  | 0.463 | 10  | 8.1  | Q2 |
| IPI00328293; | SRRM1    | 5    | 8.83E-18  | 0.463 | 6   | 14.7 | Q2 |
| IPI00154473; | GFM1     | 10.1 | 2.31E-29  | 0.464 | 7   | 10.4 | Q2 |
| IPI00068506; | ABCF2    | 9.8  | 2.06E-23  | 0.464 | 5   | 7.5  | Q2 |
| IPI00295992; | ATAD3A   | 28   | 1.30E-53  | 0.464 | 19  | 11.8 | Q2 |
| IPI00102059; | SCYL1    | 5.3  | 8.70E-08  | 0.467 | 4   | 14.8 | Q2 |
| IPI00219445; | PSME3    | 21.3 | 1.25E-54  | 0.470 | 7   | 68.5 | Q2 |
| IPI00922250  | OCC1     | 34.9 | 1.71E-17  | 0.470 | 2   | 6.3  | Q2 |
| IPI00021954; | GBF1     | 7.7  | 9.10E-68  | 0.471 | 17  | 20.2 | Q2 |
| IPI00550746; | NUDC     | 9.7  | 2.20E-18  | 0.471 | 4   | 10.8 | Q2 |
| IPI00009342; | IQGAP1   | 61.1 | <1.0E-304 | 0.475 | 138 | 35.7 | Q2 |
| IPI00024425; | KIAA0664 | 7.3  | 4.36E-24  | 0.478 | 10  | 53.8 | Q2 |
| IPI00165393; | ANP32E   | 9.3  | 3.10E-03  | 0.478 | 2   | 5.3  | Q2 |
| IPI00029447; | GOSR1    | 8.8  | 1.10E-08  | 0.479 | 2   | 20.1 | Q2 |
| IPI00186290; | EEF2     | 58.9 | <1.0E-304 | 0.485 | 153 | 55.4 | Q2 |
| IPI00030770; | PSMG1    | 8.3  | 1.89E-07  | 0.487 | 3   | 0.3  | Q2 |

|              |          |      |           |       |    |       |    |
|--------------|----------|------|-----------|-------|----|-------|----|
| IPI00074604; | GLMN     | 6.7  | 1.14E-08  | 0.487 | 3  | 0.2   | Q2 |
| IPI00300659; | CDC73    | 8.5  | 6.80E-06  | 0.488 | 4  | 10.0  | Q2 |
| IPI00166865  | CISD2    | 30.4 | 1.37E-07  | 0.488 | 4  | 21.0  | Q2 |
| IPI00645078; | UBA1     | 44.7 | <1.0E-304 | 0.488 | 83 | 34.2  | Q2 |
| IPI00641076; | FAM65A   | 2.6  | 1.52E-04  | 0.489 | 2  | 21.4  | Q2 |
| IPI00301021; | SSR1     | 11.9 | 2.17E-13  | 0.489 | 5  | 14.5  | Q2 |
| IPI00420014; | SNRNP200 | 26   | <1.0E-304 | 0.491 | 64 | 19.2  | Q2 |
| IPI00783872; | CAPRIN1  | 13.3 | 1.19E-42  | 0.491 | 13 | 9.4   | Q2 |
| IPI00156791; | KLHL22   | 3    | 3.06E-08  | 0.491 | 3  | 304.3 | Q2 |
| IPI00013468; | BUB3     | 22   | 7.11E-23  | 0.492 | 7  | 9.4   | Q2 |
| IPI00549205; | RAD50    | 12.5 | 1.55E-86  | 0.492 | 17 | 14.5  | Q2 |
| IPI00305064; | CD44     | 10.5 | 1.03E-74  | 0.493 | 34 | 79.1  | Q2 |
| IPI00006207; | LRRFIP1  | 20.4 | 1.52E-103 | 0.494 | 14 | 8.8   | Q2 |
| IPI00218187; | PPP1CC   | 8.3  | 9.37E-124 | 0.495 | 3  | 26.5  | Q2 |
| IPI00815893; | CHD2     | 1    | 9.70E-03  | 0.496 | 2  | 8.6   | Q2 |
| IPI00873226; | hTGP     | 1.3  | 7.56E-03  | 0.496 | 5  | 16.1  | Q2 |
| IPI00011675; | SP100    | 3.2  | 3.02E-11  | 0.497 | 4  | 5.6   | Q2 |
| IPI00328113; | FBN1     | 1.5  | 3.42E-10  | 0.498 | 4  | 11.4  | Q2 |
| IPI00004324; | TRAPPC3  | 26.1 | 9.17E-25  | 0.498 | 4  | 8.1   | Q2 |
| IPI00177509  | TRAPPC5  | 9    | 2.10E-05  | 0.501 | 2  | 7.7   | Q3 |
| IPI00165026; | SETD3    | 3.4  | 5.62E-07  | 0.501 | 2  | 13.4  | Q3 |
| IPI00513971; | RPS27    | 40.5 | 3.80E-40  | 0.502 | 6  | 29.1  | Q3 |
| IPI00552073; | DHX16    | 3.7  | 8.22E-10  | 0.504 | 3  | 4.4   | Q3 |
| IPI00217277; | SLC25A10 | 5.4  | 1.43E-01  | 0.505 | 2  | 3.7   | Q3 |
| IPI00007797; | FABP5    | 26.7 | 2.41E-08  | 0.505 | 5  | 4.7   | Q3 |
| IPI00297572; | AQR      | 1.2  | 6.71E-02  | 0.509 | 4  | 18.9  | Q3 |
| IPI00007818; | CPSF3    | 3.9  | 5.75E-06  | 0.513 | 3  | 0.3   | Q3 |
| IPI00921996; | STMN1    | 35.6 | 7.10E-26  | 0.514 | 9  | 9.2   | Q3 |
| IPI00794900  | MTHFD1   | 38.7 | 1.16E-293 | 0.515 | 59 | 26.1  | Q3 |
| IPI00873106; | MOB4A    | 11.6 | 1.70E-03  | 0.520 | 4  | 6.4   | Q3 |
| IPI00215637; | DDX3X    | 34   | 7.69E-261 | 0.524 | 38 | 33.7  | Q3 |
| IPI00549389; | METTL11A | 9.4  | 1.34E-29  | 0.534 | 2  | 14.1  | Q3 |
| IPI00216046; | SMARCA1  | 4.5  | 2.06E-66  | 0.539 | 5  | 13.2  | Q3 |

|              |          |      |           |       |     |       |    |
|--------------|----------|------|-----------|-------|-----|-------|----|
| IPI00059292; | MAGOHB   | 30.4 | 2.41E-17  | 0.541 | 4   | 10.9  | Q3 |
| IPI00296526; | NAGK     | 42.1 | 2.49E-110 | 0.541 | 17  | 9.9   | Q3 |
| IPI00014533; | UBTF     | 2.6  | 5.97E-03  | 0.544 | 2   | 7.7   | Q3 |
| IPI00010402; | SH3BGR13 | 12.8 | 1.12E-56  | 0.545 | 4   | 4.6   | Q3 |
| IPI00220687; | HM13     | 7.3  | 2.46E-13  | 0.546 | 3   | 1.2   | Q3 |
| IPI00827535; | PTMA     | 35.1 | 3.63E-56  | 0.550 | 8   | 29.6  | Q3 |
| IPI00477494; | DRAP1    | 10.4 | 2.89E-11  | 0.551 | 2   | 3.1   | Q3 |
| IPI00903119; | SMS      | 12   | 2.55E-07  | 0.553 | 5   | 9.5   | Q3 |
| IPI00026970; | SUPT16H  | 25.3 | 8.39E-105 | 0.554 | 27  | 14.9  | Q3 |
| IPI00798127; | UBC      | 67.7 | 1.66E-60  | 0.556 | 70  | 19.0  | Q3 |
| IPI00017617; | DDX5     | 35.3 | 6.43E-127 | 0.557 | 41  | 27.0  | Q3 |
| IPI00790342; | RPL6     | 39.1 | 9.86E-71  | 0.561 | 15  | 25.0  | Q3 |
| IPI00022348; | PML      | 3.4  | 3.40E-09  | 0.563 | 3   | 14.8  | Q3 |
| IPI00005792; | PABPN1   | 8.8  | 1.30E-53  | 0.565 | 2   | 152.1 | Q3 |
| IPI00152998  | LRRC40   | 16.3 | 2.02E-18  | 0.565 | 10  | 7.3   | Q3 |
| IPI00642816; | SRP9     | 34.9 | 6.16E-16  | 0.568 | 4   | 5.5   | Q3 |
| IPI00856098; | RRBP1    | 41.6 | <1.0E-304 | 0.568 | 110 | 52.7  | Q3 |
| IPI00375714; | HSPB7    | 9.7  | 4.27E-23  | 0.568 | 2   | 6.5   | Q3 |
| IPI00744711; | PNPT1    | 7.7  | 2.70E-04  | 0.568 | 7   | 9.4   | Q3 |
| IPI00782992; | SRRM2    | 4.6  | 2.40E-24  | 0.571 | 13  | 39.3  | Q3 |
| IPI00384689; | PDXDC1   | 10.8 | 8.85E-101 | 0.571 | 7   | 8.3   | Q3 |
| IPI00032314  | LAGE3    | 10.5 | 1.67E-26  | 0.572 | 2   | 7.5   | Q3 |
| IPI00013455; | CLIP1    | 6.9  | 3.89E-43  | 0.573 | 10  | 21.1  | Q3 |
| IPI00414676; | HSP90AB1 | 38.3 | <1.0E-304 | 0.574 | 91  | 29.0  | Q3 |
| IPI00293126; | TBCB     | 29.5 | 2.38E-96  | 0.576 | 5   | 5.8   | Q3 |
| IPI00106491  | MRT04    | 8.4  | 6.26E-02  | 0.576 | 2   | 14.1  | Q3 |
| IPI00798011; | SUMO3    | 8.2  | 2.96E-18  | 0.577 | 6   | 12.5  | Q3 |
| IPI00018246; | HK1      | 36.8 | <1.0E-304 | 0.579 | 70  | 34.9  | Q3 |
| IPI00890837; | SMCHD1   | 4.3  | 7.91E-38  | 0.579 | 9   | 28.5  | Q3 |
| IPI00007166  | IER3IP1  | 34.1 | 2.67E-59  | 0.582 | 3   | 9.3   | Q3 |
| IPI00152658; | NEK7     | 13.9 | 8.26E-05  | 0.584 | 4   | 14.1  | Q3 |
| IPI00025491; | EIF4A1   | 35.5 | 3.97E-177 | 0.585 | 26  | 53.0  | Q3 |
| IPI00009274  | COPZ2    | 23.3 | 8.15E-21  | 0.587 | 3   | 153.6 | Q3 |

|              |          |      |           |       |     |      |    |
|--------------|----------|------|-----------|-------|-----|------|----|
| IPI00005780; | OGT      | 1.9  | 5.31E-02  | 0.587 | 2   | 11.2 | Q3 |
| IPI00021805; | MGST1    | 43.2 | 4.75E-39  | 0.591 | 9   | 18.4 | Q3 |
| IPI00024662  | CBX5     | 11   | 7.09E-13  | 0.593 | 2   | 0.9  | Q3 |
| IPI00015351; | C1orf128 | 9.5  | 2.49E-06  | 0.596 | 2   | 2.0  | Q3 |
| IPI00019380; | NCBP1    | 2.7  | 2.86E-05  | 0.596 | 3   | 3.4  | Q3 |
| IPI00916503; | BZW1     | 4.9  | 8.74E-18  | 0.596 | 3   | 7.1  | Q3 |
| IPI00871695; | DEK      | 4.5  | 1.67E-06  | 0.597 | 2   | 2.2  | Q3 |
| IPI00216319; | YWHAH    | 38.6 | 1.45E-123 | 0.600 | 13  | 8.5  | Q3 |
| IPI00782965; | HIP1     | 4.1  | 4.62E-27  | 0.601 | 4   | 18.7 | Q3 |
| IPI00033036; | METAP2   | 10.3 | 2.18E-28  | 0.602 | 4   | 2.5  | Q3 |
| IPI00016746; | CBFB     | 14.8 | 3.48E-05  | 0.602 | 4   | 6.7  | Q3 |
| IPI00003515; | TRIP11   | 4    | 1.31E-20  | 0.603 | 5   | 3.4  | Q3 |
| IPI00216047; | SMARCC2  | 4    | 6.89E-11  | 0.605 | 5   | 29.0 | Q3 |
| IPI00470883; | STAG2    | 3.2  | 1.95E-11  | 0.610 | 5   | 6.7  | Q3 |
| IPI00642971; | EEF1D    | 16.8 | 4.74E-130 | 0.614 | 17  | 42.4 | Q3 |
| IPI00844361; | RAB18    | 24.7 | 6.23E-45  | 0.617 | 6   | 14.1 | Q3 |
| IPI00007402  | IPO7     | 26.4 | <1.0E-304 | 0.618 | 34  | 23.3 | Q3 |
| IPI00385267  | SRPR     | 34.2 | 1.46E-112 | 0.619 | 28  | 9.5  | Q3 |
| IPI00007346; | PPIH     | 18.6 | 9.96E-13  | 0.621 | 5   | 5.1  | Q3 |
| IPI00186194; | CEP170   | 7.2  | 4.98E-16  | 0.622 | 9   | 11.1 | Q3 |
| IPI00784161; | SUPT6H   | 0.9  | 1.27E-01  | 0.630 | 2   | 3.6  | Q3 |
| IPI00410488; | CD276    | 8.1  | 4.71E-03  | 0.630 | 4   | 40.2 | Q3 |
| IPI00009456; | NT5E     | 43.2 | 8.21E-256 | 0.631 | 41  | 10.8 | Q3 |
| IPI00022228; | HDLBP    | 48.9 | <1.0E-304 | 0.632 | 102 | 53.1 | Q3 |
| IPI00023860; | NAP1L1   | 17.9 | 1.67E-152 | 0.633 | 8   | 39.4 | Q3 |
| IPI00221035; | BTF3     | 45.6 | 5.07E-60  | 0.633 | 7   | 6.3  | Q3 |
| IPI00174025; | DNMBP    | 1.8  | 7.79E-20  | 0.638 | 3   | 11.6 | Q3 |
| IPI00029079; | GMPS     | 15.7 | 1.40E-88  | 0.638 | 10  | 14.6 | Q3 |
| IPI00031821; | ITM2B    | 7.5  | 2.03E-06  | 0.643 | 2   | 6.5  | Q3 |
| IPI00297593; | USP34    | 0.3  | 1.84E-02  | 0.645 | 2   | 18.6 | Q3 |
| IPI00783835; | RNF160   | 2.4  | 7.66E-30  | 0.646 | 4   | 4.8  | Q3 |
| IPI00019400; | TPMT     | 9.8  | 2.67E-08  | 0.648 | 3   | 5.3  | Q3 |
| IPI00060181; | EFHD2    | 33.8 | 2.16E-27  | 0.649 | 11  | 14.7 | Q3 |

|              |          |      |           |       |    |      |    |
|--------------|----------|------|-----------|-------|----|------|----|
| IPI00651738  | ADI1     | 11.7 | 1.11E-06  | 0.652 | 2  | 29.1 | Q3 |
| IPI00011619; | PAPSS1   | 14.7 | 2.07E-75  | 0.652 | 12 | 6.4  | Q3 |
| IPI00852685; | DIAPH1   | 7.5  | 8.67E-35  | 0.653 | 11 | 75.3 | Q3 |
| IPI00924713; | PCYT1A   | 11.3 | 3.34E-53  | 0.654 | 3  | 15.5 | Q3 |
| IPI00026516; | OXCT1    | 12.9 | 4.88E-29  | 0.656 | 3  | 8.6  | Q3 |
| IPI00028160; | HMBS     | 8.6  | 3.21E-05  | 0.657 | 2  | 2.0  | Q3 |
| IPI00829865; | TMTC3    | 1.1  | 4.21E-06  | 0.658 | 2  | 7.1  | Q3 |
| IPI00022334  | OAT      | 12.3 | 9.54E-58  | 0.663 | 4  | 7.3  | Q3 |
| IPI00027444; | SERPINB1 | 18.2 | 1.35E-56  | 0.664 | 6  | 17.1 | Q3 |
| IPI00410067; | ZC3HAV1  | 10.5 | 1.00E-150 | 0.666 | 7  | 7.5  | Q3 |
| IPI00165477; | ELP3     | 4.9  | 9.99E-03  | 0.666 | 3  | 9.5  | Q3 |
| IPI00419237; | LAP3     | 8.7  | 6.52E-40  | 0.672 | 4  | 94.9 | Q3 |
| IPI00100748  | HSPBP1   | 6.7  | 5.26E-04  | 0.672 | 2  | 2.1  | Q3 |
| IPI00293434; | SRP14    | 34.6 | 1.24E-35  | 0.675 | 6  | 7.8  | Q3 |
| IPI00306723  | CEBPZ    | 2.2  | 2.80E-03  | 0.676 | 2  | 3.1  | Q3 |
| IPI00019463; | EIF2AK2  | 20.1 | 3.48E-91  | 0.676 | 12 | 6.1  | Q3 |
| IPI00328319; | RBBP4    | 8.2  | 5.30E-52  | 0.681 | 3  | 12.9 | Q3 |
| IPI00298949; | GAK      | 3    | 2.78E-09  | 0.681 | 3  | 81.0 | Q3 |
| IPI00009943; | TPT1     | 28.7 | 2.86E-67  | 0.684 | 13 | 5.4  | Q3 |
| IPI00016639  | PRKCI    | 2.3  | 1.42E-15  | 0.687 | 2  | 2.4  | Q3 |
| IPI00329600; | SCCPDH   | 8.6  | 1.41E-17  | 0.690 | 3  | 9.5  | Q3 |
| IPI00465315; | CYCS     | 40   | 1.16E-37  | 0.690 | 9  | 8.0  | Q3 |
| IPI00873189; | SLC35B2  | 2.3  | 3.44E-03  | 0.693 | 2  | 21.5 | Q3 |
| IPI00022542; | ROCK1    | 9.6  | 1.91E-124 | 0.693 | 13 | 29.3 | Q3 |
| IPI00069817; | BAZ1B    | 2.5  | 2.62E-06  | 0.697 | 4  | 7.4  | Q3 |
| IPI00745406; | SPAG9    | 12.9 | 7.79E-124 | 0.699 | 16 | 15.8 | Q3 |
| IPI00020986; | LUM      | 8.2  | 1.06E-88  | 0.705 | 3  | 1.6  | Q3 |
| IPI00007940; | ERLIN1   | 19.5 | 5.77E-92  | 0.705 | 7  | 9.6  | Q3 |
| IPI00642259; | DST      | 1.4  | 2.85E-38  | 0.707 | 11 | 11.9 | Q3 |
| IPI00301263; | CAD      | 18   | 2.44E-194 | 0.708 | 43 | 36.1 | Q3 |
| IPI00018146; | YWHAQ    | 53.1 | 2.05E-155 | 0.713 | 17 | 10.0 | Q3 |
| IPI00792312; | INTS3    | 2.9  | 1.21E-03  | 0.714 | 3  | 6.4  | Q3 |
| IPI00030371; | TRIM4    | 3.6  | 3.22E-01  | 0.716 | 11 | 69.4 | Q3 |

|              |         |      |           |       |     |      |    |
|--------------|---------|------|-----------|-------|-----|------|----|
| IPI00006167; | PPM1G   | 15.4 | 4.56E-25  | 0.719 | 8   | 26.3 | Q3 |
| IPI00218993; | HSPH1   | 35   | 9.60E-189 | 0.719 | 34  | 20.3 | Q3 |
| IPI00297211  | SMARCA5 | 20.6 | 3.39E-120 | 0.724 | 30  | 10.3 | Q3 |
| IPI00017567; | ENG     | 4.3  | 9.31E-12  | 0.727 | 2   | 30.3 | Q3 |
| IPI00000001; | STAU1   | 6.2  | 3.89E-11  | 0.729 | 3   | 17.5 | Q3 |
| IPI00060715; | KCTD12  | 8.6  | 1.36E-06  | 0.730 | 4   | 37.3 | Q3 |
| IPI00220873; | PAPSS2  | 33.3 | 1.33E-131 | 0.731 | 22  | 9.9  | Q3 |
| IPI00008822; | PRRX1   | 22.9 | 3.32E-20  | 0.735 | 6   | 6.7  | Q3 |
| IPI00021453  | PPAP2B  | 11.3 | 1.63E-28  | 0.735 | 5   | 10.1 | Q3 |
| IPI00025156; | STUB1   | 8.3  | 4.51E-27  | 0.744 | 2   | 16.9 | Q3 |
| IPI00455210; | CHD4    | 9.1  | 4.83E-121 | 0.744 | 21  | 26.0 | Q3 |
| IPI00873829; | ACAA2   | 14.1 | 1.00E-36  | 0.745 | 7   | 4.7  | Q3 |
| IPI00009790; | PFKP    | 41.1 | <1.0E-304 | 0.752 | 55  | 15.1 | Q3 |
| IPI00106913; | DHRS4   | 7.9  | 1.36E-04  | 0.752 | 2   | 4.6  | Q3 |
| IPI00007401  | IPO8    | 4.4  | 8.28E-10  | 0.752 | 5   | 15.4 | Q3 |
| IPI00298476; | GREM1   | 17.9 | 1.06E-30  | 0.766 | 2   | 9.6  | Q3 |
| IPI00219005  | FKBP4   | 9.8  | 6.32E-39  | 0.766 | 4   | 8.7  | Q3 |
| IPI00023004; | EIF1AY  | 22.9 | 4.33E-15  | 0.772 | 3   | 3.0  | Q3 |
| IPI00022744; | CSE1L   | 28.2 | 3.15E-236 | 0.777 | 44  | 12.4 | Q3 |
| IPI00009010; | AD-001  | 36   | 1.32E-41  | 0.780 | 4   | 17.4 | Q3 |
| IPI00607584; | MYBBP1A | 10.1 | 1.66E-69  | 0.784 | 18  | 41.5 | Q3 |
| IPI00021147  | DEGS1   | 10.5 | 2.42E-39  | 0.791 | 3   | 10.7 | Q3 |
| IPI00854642; | PDS5A   | 2.3  | 2.85E-03  | 0.791 | 3   | 11.5 | Q3 |
| IPI00021290; | ACLY    | 55.4 | <1.0E-304 | 0.795 | 113 | 46.6 | Q3 |
| IPI00413140; | DNM1    | 3.9  | 2.04E-14  | 0.801 | 3   | 8.3  | Q3 |
| IPI00291939; | SMC1A   | 9.1  | 5.34E-15  | 0.801 | 12  | 16.8 | Q3 |
| IPI00903255; | OSTF1   | 26.6 | 8.17E-22  | 0.806 | 4   | 8.7  | Q3 |
| IPI00073602  | EXOSC6  | 5.5  | 7.87E-02  | 0.809 | 2   | 10.7 | Q3 |
| IPI00792677; | TUBA1B  | 6    | <1.0E-304 | 0.811 | 25  | 46.6 | Q3 |
| IPI00925413; | EIF4G1  | 23.3 | 1.32E-252 | 0.817 | 55  | 42.5 | Q3 |
| IPI00032826; | ST13    | 6    | 7.64E-02  | 0.818 | 2   | 95.8 | Q3 |
| IPI00797603; | PRPSAP1 | 12.2 | 3.02E-24  | 0.829 | 3   | 20.9 | Q3 |
| IPI00004962  | GOLIM4  | 7.3  | 1.41E-32  | 0.831 | 4   | 28.2 | Q3 |



|              |          |      |           |       |    |      |    |
|--------------|----------|------|-----------|-------|----|------|----|
| IPI00011702  | KIAA0406 | 3.3  | 8.71E-32  | 0.834 | 2  | 5.4  | Q3 |
| IPI00183695  | S100A10  | 45.4 | 2.77E-33  | 0.838 | 7  | 12.0 | Q3 |
| IPI00334587; | HNRNPAB  | 13   | 6.79E-55  | 0.841 | 7  | 66.8 | Q3 |
| IPI00477118; | TMEM214  | 19.4 | 2.88E-71  | 0.842 | 19 | 29.7 | Q3 |
| IPI00010586; | TMF1     | 3.3  | 6.98E-10  | 0.849 | 3  | 7.3  | Q3 |
| IPI00143921; | KDELC2   | 11.4 | 1.74E-37  | 0.855 | 8  | 4.5  | Q3 |
| IPI00027721  | PDGFRA   | 2.6  | 4.55E-36  | 0.858 | 2  | 19.4 | Q3 |
| IPI00178431; | RECQL    | 18.2 | 9.77E-43  | 0.858 | 17 | 25.5 | Q3 |
| IPI00029741; | ITGB5    | 4.5  | 3.65E-24  | 0.860 | 4  | 16.0 | Q3 |
| IPI00293735  | IKBKAP   | 2.1  | 6.43E-05  | 0.867 | 3  | 44.3 | Q3 |
| IPI00003802  | MAN2A1   | 12.9 | 5.41E-68  | 0.871 | 15 | 7.4  | Q3 |
| IPI00022386; | TXNDC9   | 8    | 2.93E-02  | 0.889 | 2  | 2.3  | Q3 |
| IPI00016669  | RHEB     | 28.3 | 3.04E-38  | 0.893 | 5  | 11.8 | Q3 |
| IPI00146380; | C9orf21  | 9.3  | 2.01E-19  | 0.918 | 2  | 5.0  | Q3 |
| IPI00926925; | OGDH     | 17.6 | 3.08E-47  | 0.920 | 18 | 11.3 | Q3 |
| IPI00031420  | UGDH     | 19   | 7.65E-30  | 0.924 | 9  | 66.5 | Q3 |
| IPI00009885; | FKBP11   | 9    | 3.44E-12  | 0.924 | 4  | 7.6  | Q3 |
| IPI00334282; | FAM3C    | 26.9 | 3.30E-129 | 0.927 | 4  | 5.3  | Q3 |
| IPI00550854; | MXRA8    | 8.6  | 2.32E-30  | 0.939 | 3  | 8.8  | Q3 |
| IPI00008552  | GLRX3    | 23.6 | 7.52E-65  | 0.948 | 8  | 26.2 | Q3 |
| IPI00152540; | CD109    | 3.8  | 2.11E-18  | 0.948 | 5  | 8.9  | Q3 |
| IPI00645849; | ECM1     | 5.8  | 3.57E-20  | 0.956 | 3  | 17.3 | Q3 |
| IPI00914871; | SERPINE2 | 11.7 | 2.68E-80  | 0.956 | 11 | 23.1 | Q3 |
| IPI00061525; | GPNPAT1  | 29.3 | 7.90E-114 | 0.962 | 4  | 11.5 | Q3 |
| IPI00294211; | DHX38    | 2.9  | 2.16E-27  | 0.962 | 3  | 23.2 | Q3 |
| IPI00903155  | SWAP70   | 3.4  | 6.18E-101 | 0.964 | 2  | 4.6  | Q3 |
| IPI00332499; | NASP     | 13.5 | 5.53E-55  | 0.978 | 15 | 19.8 | Q3 |
| IPI00396485; | EEF1A1   | 45.5 | 4.02E-144 | 0.982 | 88 | 67.4 | Q3 |
| IPI00008475  | HMGCS1   | 4.6  | 5.43E-21  | 0.983 | 2  | 4.8  | Q3 |
| IPI00030781; | STAT1    | 45.5 | 3.29E-233 | 0.988 | 58 | 14.2 | Q3 |
| IPI00291510; | IMPDH2   | 4.5  | 2.77E-13  | 0.991 | 2  | 76.7 | Q3 |
| IPI00395627; | CACYBP   | 59.6 | 5.05E-64  | 0.991 | 11 | 15.6 | Q3 |
| IPI00016381; | RAB27A   | 10.9 | 4.30E-11  | 1.000 | 2  | 24.1 | Q3 |

|              |          |      |           |       |     |       |    |
|--------------|----------|------|-----------|-------|-----|-------|----|
| IPI00015953; | DDX21    | 12.9 | 9.53E-55  | 1.008 | 10  | 6.1   | Q3 |
| IPI00291215; | PARP14   | 5.8  | 1.42E-85  | 1.012 | 7   | 9.3   | Q3 |
| IPI00014232; | ARL6IP1  | 20.7 | 1.48E-12  | 1.029 | 5   | 14.2  | Q3 |
| IPI00024719; | HAT1     | 3.1  | 6.78E-02  | 1.029 | 2   | 46.5  | Q3 |
| IPI00221328; | CLIC2    | 7.3  | 2.04E-14  | 1.035 | 2   | 0.5   | Q3 |
| IPI00465248; | ENO1     | 43.1 | 3.98E-252 | 1.050 | 61  | 86.5  | Q3 |
| IPI00180675; | TUBA1A   | 50.1 | <1.0E-304 | 1.088 | 78  | 57.8  | Q3 |
| IPI00293590; | MGLL     | 11.5 | 2.50E-21  | 1.096 | 3   | 17.1  | Q3 |
| IPI00031030; | APLP2    | 6.2  | 3.42E-03  | 1.119 | 4   | 29.3  | Q3 |
| IPI00016568; | AK3L1    | 15.7 | 3.04E-03  | 1.135 | 3   | 6.3   | Q3 |
| IPI00216230; | TMPO     | 18.3 | 8.89E-85  | 1.149 | 12  | 29.7  | Q3 |
| IPI00329672; | MYO1E    | 23.2 | 7.42E-96  | 1.164 | 23  | 22.7  | Q3 |
| IPI00017303; | MSH2     | 6.7  | 1.18E-37  | 1.176 | 7   | 53.5  | Q3 |
| IPI00640703; | XPO5     | 5.4  | 2.02E-80  | 1.188 | 6   | 6.1   | Q3 |
| IPI00022418; | FN1      | 27.3 | <1.0E-304 | 1.195 | 113 | 35.7  | Q3 |
| IPI00003411  | PTGIS    | 19.2 | 1.07E-27  | 1.217 | 6   | 33.6  | Q3 |
| IPI00010187; | ELOVL1   | 4.7  | 4.42E-12  | 1.223 | 2   | 108.6 | Q3 |
| IPI00003881  | HNRNPF   | 4.8  | 3.15E-14  | 1.224 | 4   | 89.1  | Q3 |
| IPI00058192; | POFUT1   | 6.7  | 1.86E-24  | 1.248 | 2   | 4.8   | Q3 |
| IPI00856045; | AHNAK2   | 27.1 | <1.0E-304 | 1.265 | 76  | 45.7  | Q3 |
| IPI00031519; | DNMT1    | 4.5  | 1.13E-55  | 1.283 | 8   | 5.2   | Q3 |
| IPI00418471; | VIM      | 88.2 | <1.0E-304 | 1.304 | 394 | 56.0  | Q3 |
| IPI00007061; | GOLT1B   | 10.1 | 8.57E-10  | 1.315 | 2   | 21.5  | Q3 |
| IPI00299524; | NCAPD2   | 6.6  | 2.45E-39  | 1.345 | 9   | 34.8  | Q3 |
| IPI00294739; | SAMHD1   | 29.9 | 5.45E-104 | 1.365 | 19  | 16.7  | Q3 |
| IPI00004392; | NUDT1    | 12.2 | 1.87E-07  | 1.369 | 2   | 9.3   | Q3 |
| IPI00016621; | AP2A2    | 20.4 | 8.81E-168 | 1.373 | 16  | 187.2 | Q3 |
| IPI00797279; | UHRF1    | 2.4  | 2.41E-06  | 1.395 | 2   | 56.1  | Q3 |
| IPI00384456; | MSH6     | 10.1 | 2.85E-65  | 1.406 | 12  | 13.6  | Q3 |
| IPI00007118; | SERPINE1 | 4.2  | 2.74E-04  | 1.423 | 3   | 61.3  | Q3 |
| IPI00328905  | IQGAP3   | 11.3 | 5.87E-81  | 1.438 | 15  | 14.9  | Q3 |
| IPI00550523; | ATL3     | 14   | 2.78E-11  | 1.454 | 6   | 13.4  | Q3 |
| IPI00216088; | CRABP2   | 29   | 1.42E-29  | 1.456 | 4   | 190.8 | Q3 |

|              |        |      |           |       |     |       |    |
|--------------|--------|------|-----------|-------|-----|-------|----|
| IPI00106495  | NCAPG  | 7.6  | 1.65E-48  | 1.464 | 7   | 12.2  | Q3 |
| IPI00013214; | MCM3   | 21.8 | 2.92E-93  | 1.466 | 21  | 74.3  | Q3 |
| IPI00021700  | PCNA   | 37.9 | 1.24E-150 | 1.468 | 15  | 19.9  | Q3 |
| IPI00168317; | SPC24  | 8.6  | 2.68E-23  | 1.488 | 2   | 8.4   | Q3 |
| IPI00333541; | FLNA   | 67.5 | <1.0E-304 | 1.493 | 585 | 105.9 | Q3 |
| IPI00020127; | RPA1   | 26.1 | 2.64E-58  | 1.499 | 16  | 12.3  | Q3 |
| IPI00013933; | DSP    | 3.9  | 1.54E-74  | 1.504 | 10  | 10.9  | Q3 |
| IPI00291483  | AKR1C3 | 26   | 1.89E-30  | 1.512 | 10  | 25.2  | Q3 |
| IPI00022977; | CKB    | 28.1 | 1.08E-175 | 1.514 | 12  | 18.5  | Q3 |
| IPI00010219  | SPC25  | 7.6  | 1.56E-10  | 1.517 | 2   | 3.3   | Q3 |
| IPI00000684; | UAP1   | 24.9 | 2.81E-66  | 1.526 | 18  | 24.8  | Q3 |
| IPI00395488  | VASN   | 13.5 | 5.58E-63  | 1.527 | 8   | 59.9  | Q3 |
| IPI00005668; | AKR1C2 | 31.6 | 1.37E-42  | 1.537 | 6   | 11.4  | Q3 |
| IPI00646500; | RPA2   | 5.6  | 2.61E-09  | 1.542 | 2   | 29.6  | Q3 |
| IPI00017672; | NP     | 43.7 | 1.28E-138 | 1.548 | 14  | 11.6  | Q3 |
| IPI00011654; | TUBB   | 73   | <1.0E-304 | 1.565 | 80  | 55.9  | Q3 |
| IPI00002214; | KPNA2  | 4.2  | 1.02E-07  | 1.576 | 4   | 8.3   | Q3 |
| IPI00655631; | POLD1  | 2.9  | 9.58E-05  | 1.584 | 3   | 25.0  | Q3 |
| IPI00887771; | DHFR   | 10.8 | 8.16E-04  | 1.605 | 2   | 72.8  | Q3 |
| IPI00219616; | PRPS1  | 34.9 | 3.43E-83  | 1.613 | 13  | 12.3  | Q3 |
| IPI00420108; | DLST   | 13.5 | 9.17E-105 | 1.636 | 14  | 93.1  | Q3 |
| IPI00004233; | MKI67  | 1.7  | 2.40E-11  | 1.662 | 2   | 1.3   | Q3 |
| IPI00848090; | CAPG   | 45.4 | 1.10E-154 | 1.673 | 21  | 33.9  | Q3 |
| IPI00010141  | POLE3  | 10.9 | 3.65E-31  | 1.705 | 2   | 7.2   | Q3 |
| IPI00030280  | LRRC32 | 3.8  | 1.93E-10  | 1.708 | 2   | 11.0  | Q3 |
| IPI00020454  | DCK    | 14.2 | 5.40E-04  | 1.709 | 4   | 11.0  | Q3 |
| IPI00921911; | CRIP2  | 17   | 2.45E-59  | 1.710 | 2   | 6.0   | Q3 |
| IPI00007927; | SMC2   | 18.8 | 2.10E-72  | 1.712 | 20  | 9.8   | Q3 |
| IPI00017412; | RFC2   | 17.8 | 9.12E-29  | 1.727 | 5   | 11.3  | Q3 |
| IPI00074962; | ANK2   | 0.6  | 2.15E-07  | 1.746 | 4   | 124.0 | Q3 |
| IPI00010790; | BGN    | 9.2  | 1.18E-10  | 1.762 | 5   | 96.9  | Q3 |
| IPI00009276  | PROCR  | 9.5  | 1.08E-52  | 1.782 | 2   | 0.7   | Q3 |
| IPI00154975; | DNAJC9 | 20.8 | 9.02E-19  | 1.824 | 7   | 6.4   | Q3 |

|              |         |      |           |       |    |       |    |
|--------------|---------|------|-----------|-------|----|-------|----|
| IPI00411559; | SMC4    | 14.8 | 1.78E-90  | 1.829 | 19 | 16.5  | Q3 |
| IPI00027705  | PRIM2   | 4.5  | 2.20E-16  | 1.841 | 2  | 10.8  | Q3 |
| IPI00010740; | SFPQ    | 33.5 | 9.19E-159 | 1.843 | 50 | 189.3 | Q3 |
| IPI00184330; | MCM2    | 33.4 | 2.99E-237 | 1.853 | 33 | 30.5  | Q3 |
| IPI00013871  | RRM1    | 4.3  | 1.24E-07  | 1.865 | 3  | 25.0  | Q3 |
| IPI00005737; | SURF4   | 24.5 | 5.14E-86  | 1.871 | 37 | 117.5 | Q3 |
| IPI00013679; | DUT     | 25.8 | 1.98E-100 | 1.885 | 7  | 8.0   | Q3 |
| IPI00872194; | COLEC12 | 5.1  | 6.27E-14  | 1.951 | 6  | 93.4  | Q3 |
| IPI00025818  | GALNT1  | 3.8  | 4.31E-10  | 1.964 | 3  | 11.1  | Q3 |
| IPI00216159  | GFPT2   | 6.3  | 2.54E-57  | 2.016 | 3  | 4.9   | Q3 |
| IPI00018350; | MCM5    | 20.4 | 1.55E-101 | 2.042 | 18 | 19.7  | Q3 |
| IPI00299904; | MCM7    | 31.7 | 6.60E-150 | 2.056 | 24 | 12.5  | Q3 |
| IPI00021766; | RTN4    | 7    | 7.43E-35  | 2.098 | 11 | 53.4  | Q3 |
| IPI00879004; | TOP2A   | 3.2  | 1.53E-73  | 2.100 | 5  | 18.5  | Q3 |
| IPI00031517; | MCM6    | 18.3 | 1.68E-62  | 2.156 | 14 | 21.1  | Q3 |
| IPI00877174; | OAS3    | 8.7  | 7.32E-27  | 2.157 | 8  | 76.4  | Q3 |
| IPI00024254  | IFIT3   | 21.4 | 1.01E-27  | 2.174 | 8  | 12.9  | Q3 |
| IPI00018349; | MCM4    | 13.8 | 2.06E-58  | 2.179 | 11 | 21.2  | Q3 |
| IPI00414320; | ANXA11  | 13.7 | 7.08E-60  | 2.276 | 11 | 112.3 | Q3 |
| IPI00018300  | IFIT1   | 7.9  | 1.03E-07  | 2.323 | 3  | 1.3   | Q3 |
| IPI00218247; | TIMP3   | 13.7 | 3.74E-11  | 2.340 | 3  | 12.8  | Q3 |
| IPI00031812; | YBX1    | 23.1 | 9.01E-102 | 2.352 | 8  | 99.0  | Q3 |
| IPI00719285; | CIT     | 0.9  | 9.12E-02  | 2.411 | 2  | 7.7   | Q3 |
| IPI00375631  | ISG15   | 35.2 | 1.83E-33  | 2.533 | 13 | 30.7  | Q3 |
| IPI00025257; | SEMA7A  | 5.1  | 8.03E-11  | 2.534 | 3  | 42.6  | Q3 |
| IPI00010157; | MAT2A   | 6.1  | 2.58E-35  | 2.546 | 3  | 125.2 | Q3 |
| IPI00218831; | GSTM1   | 15.6 | 3.44E-44  | 2.553 | 4  | 27.4  | Q3 |
| IPI00913924; | LRRC15  | 26.1 | 6.12E-104 | 2.602 | 22 | 32.9  | Q3 |
| IPI00026663; | ALDH1A3 | 4.3  | 6.20E-04  | 2.835 | 2  | 19.8  | Q3 |
| IPI00654777; | EIF3F   | 26.6 | 8.12E-187 | 2.910 | 15 | 132.2 | Q3 |
| IPI00031008; | TNC     | 15   | 1.81E-108 | 3.395 | 35 | 41.9  | Q3 |
| IPI00167949; | MX1     | 25.2 | 2.68E-87  | 3.573 | 18 | 29.5  | Q3 |
| IPI00018219; | TGFBI   | 24.9 | 3.62E-61  | 3.782 | 19 | 65.7  | Q3 |

|              |         |      |          |       |    |       |    |
|--------------|---------|------|----------|-------|----|-------|----|
| IPI00604773; | PODXL   | 6.1  | 8.56E-12 | 3.922 | 4  | 23.5  | Q3 |
| IPI00465261; | ERAP2   | 12.5 | 2.14E-53 | 3.989 | 11 | 97.7  | Q3 |
| IPI00008998  | PTPLAD1 | 5.2  | 1.20E-01 | 4.011 | 3  | 30.3  | Q3 |
| IPI00001560; | CDKN2A  | 31.7 | 4.30E-26 | 4.047 | 4  | 168.4 | Q3 |

**Supplementary Table 8: Keratinocyte cell line.** Cell lysates were prepared from unlabeled (Arg0/Lys0), freshly isolated keratin and labeled (Arg10/Lys8), immortalized keratinocyte cell line. Shown are normalized log2 transformed protein ratios of identified. For identification a minimum of 2 peptides per protein has to be identified (unique + razor). The database used for identification decoy database based on IPI v. 3.59 containing in total 160,820 entries. As a criterium for identification the posterior error prob rate of identified proteins (PEP) is shown. The peptide numbers represent peptides used for quantitation.

| Protein ID   | Gene Symbol | Unique + Razor<br>Sequence<br>Coverage [%] | PEP       | Log2 Ratio | Peptide<br>No. | Variability [%] | Quantil |
|--------------|-------------|--------------------------------------------|-----------|------------|----------------|-----------------|---------|
| IPI00514638; | DAB1        | 3.6                                        | 2.31E-09  | -7.377     | 9              | 139.1           | Q1      |
| IPI00643623; | LCN2        | 31                                         | 6.39E-30  | -6.183     | 6              | 103.4           | Q1      |
| IPI00022488  | HPX         | 14.5                                       | 1.61E-23  | -6.043     | 3              | 26.4            | Q1      |
| IPI00008234; | CYB5R2      | 23.9                                       | 4.03E-09  | -5.474     | 4              | 36.5            | Q1      |
| IPI00479145; | KRT19       | 29.5                                       | <1.0E-304 | -5.236     | 10             | 65.8            | Q1      |
| IPI00011692  | IVL         | 40.7                                       | 3.82E-117 | -5.073     | 22             | 70.5            | Q1      |
| IPI00647885; | GSTM1       | 28.7                                       | 2.39E-49  | -4.918     | 3              | 17.9            | Q1      |
| IPI00022463; | TF          | 5.3                                        | 8.18E-42  | -4.878     | 3              | 90.7            | Q1      |
| IPI00304903; | SPRR1B      | 78.7                                       | 6.65E-39  | -4.772     | 12             | 36.6            | Q1      |
| IPI00006663; | ALDH2       | 8.7                                        | 4.12E-10  | -4.603     | 2              | 18.5            | Q1      |
| IPI00006091; | DMD         | 0.7                                        | 1.97E-03  | -4.513     | 4              | 209.9           | Q1      |
| IPI00789324; | JUP         | 66.8                                       | <1.0E-304 | -4.415     | 46             | 160.5           | Q1      |
| IPI00290077; | KRT15       | 65.1                                       | <1.0E-304 | -4.333     | 34             | 57.8            | Q1      |
| IPI00419215; | A2ML1       | 16.4                                       | 2.72E-116 | -4.238     | 21             | 36.8            | Q1      |
| IPI00183786; | FADS2       | 17.3                                       | 6.11E-19  | -4.100     | 3              | 9.5             | Q1      |
| IPI00847793; | DCD         | 20.7                                       | 4.46E-10  | -3.996     | 4              | 48.8            | Q1      |
| IPI00329108; | SCEL        | 5.7                                        | 6.76E-14  | -3.853     | 4              | 103.4           | Q1      |
| IPI00414442; | CDK5RAP3    | 9.6                                        | 7.24E-25  | -3.827     | 2              | 367.0           | Q1      |
| IPI00217018; | SAMD9       | 3                                          | 3.82E-13  | -3.657     | 3              | 31.6            | Q1      |
| IPI00293665; | KRT6B       | 6.6                                        | <1.0E-304 | -3.586     | 15             | 72.5            | Q1      |
| IPI00021369; | CRYAB       | 24.6                                       | 1.09E-21  | -3.484     | 4              | 21.0            | Q1      |
| IPI00792065; | TOR1AIP1    | 14.7                                       | 5.54E-95  | -3.140     | 2              | 235.9           | Q1      |
| IPI00010951  | EPPK1       | 31.6                                       | <1.0E-304 | -3.037     | 87             | 59.3            | Q1      |
| IPI00013895; | S100A11     | 56.2                                       | 2.65E-109 | -2.908     | 10             | 135.9           | Q1      |
| IPI00246975; | GSTM3       | 16.9                                       | 2.15E-29  | -2.829     | 2              | 7.1             | Q1      |

|              |          |      |           |        |     |       |    |
|--------------|----------|------|-----------|--------|-----|-------|----|
| IPI00175024; | IL1RN    | 53.5 | 2.01E-170 | -2.802 | 8   | 11.6  | Q1 |
| IPI00027444; | SERPINB1 | 48.3 | 4.28E-202 | -2.716 | 7   | 44.5  | Q1 |
| IPI00872692; | QPRT     | 12.7 | 5.95E-23  | -2.697 | 2   | 141.4 | Q1 |
| IPI00647837; | ZNF185   | 22.5 | 1.06E-127 | -2.550 | 13  | 34.3  | Q1 |
| IPI00000692; | CLIC3    | 14.4 | 1.50E-61  | -2.489 | 3   | 9.8   | Q1 |
| IPI00218414; | CA2      | 28.8 | 3.80E-80  | -2.476 | 5   | 9.0   | Q1 |
| IPI00031547  | DSG3     | 7.7  | 2.99E-85  | -2.387 | 7   | 10.1  | Q1 |
| IPI00244391  | XDH      | 5.8  | 3.12E-38  | -2.291 | 9   | 18.1  | Q1 |
| IPI00217963; | KRT16    | 42.5 | <1.0E-304 | -2.222 | 17  | 49.9  | Q1 |
| IPI00007117; | SERPINB2 | 49.6 | <1.0E-304 | -2.210 | 27  | 83.6  | Q1 |
| IPI00011609; | UBE3A    | 3.1  | 5.67E-24  | -2.163 | 2   | 20.3  | Q1 |
| IPI00409590; | LMO7     | 3.2  | 1.06E-26  | -2.147 | 4   | 41.8  | Q1 |
| IPI00026663; | ALDH1A3  | 50.8 | <1.0E-304 | -2.056 | 10  | 15.5  | Q1 |
| IPI00028618  | MGMT     | 22.7 | 1.65E-13  | -1.971 | 2   | 9.8   | Q1 |
| IPI00297910; | TACSTD2  | 25.7 | 3.38E-64  | -1.932 | 2   | 9.0   | Q1 |
| IPI00071509; | PKP1     | 21.8 | 9.76E-177 | -1.900 | 15  | 53.3  | Q1 |
| IPI00215997; | CD9      | 4.4  | 5.86E-10  | -1.851 | 4   | 9.9   | Q1 |
| IPI00012728; | ACSL1    | 9.2  | 2.24E-23  | -1.692 | 5   | 10.7  | Q1 |
| IPI00375676; | FTL      | 19.9 | 2.54E-37  | -1.650 | 8   | 6.4   | Q1 |
| IPI00414717; | GLG1     | 14.4 | 7.97E-80  | -1.602 | 17  | 12.2  | Q1 |
| IPI00005981; | TAGLN3   | 35.3 | 6.05E-25  | -1.565 | 3   | 74.8  | Q1 |
| IPI00009456; | NT5E     | 26.8 | 7.55E-130 | -1.556 | 6   | 24.2  | Q1 |
| IPI00024095; | ANXA3    | 72.8 | 1.30E-281 | -1.514 | 29  | 10.5  | Q1 |
| IPI00003096  | IL1A     | 31   | 1.92E-166 | -1.490 | 4   | 18.3  | Q1 |
| IPI00221224  | ANPEP    | 2.1  | 2.40E-02  | -1.487 | 2   | 69.6  | Q1 |
| IPI00300725; | KRT6A    | 67.4 | <1.0E-304 | -1.357 | 285 | 94.3  | Q1 |
| IPI00216138; | TAGLN    | 22.4 | 9.99E-48  | -1.338 | 2   | 15.4  | Q1 |
| IPI00018783; | ITPA     | 32.5 | 9.41E-56  | -1.338 | 4   | 7.9   | Q1 |
| IPI00896427; | C6orf132 | 1.9  | 3.34E-08  | -1.318 | 2   | 3.5   | Q1 |
| IPI00412650; | SVIL     | 2    | 3.17E-41  | -1.281 | 4   | 5.7   | Q1 |
| IPI00007955; | TRIM16   | 10.5 | 3.17E-39  | -1.275 | 4   | 7.4   | Q1 |
| IPI00290305; | TP53RK   | 14.2 | 3.76E-05  | -1.255 | 3   | 208.2 | Q1 |
| IPI00844508; | CGN      | 11.5 | 2.21E-59  | -1.239 | 11  | 29.0  | Q1 |

|              |          |      |           |        |    |       |    |
|--------------|----------|------|-----------|--------|----|-------|----|
| IPI00014398; | FHL1     | 35   | 6.78E-84  | -1.213 | 8  | 4.4   | Q1 |
| IPI00032533  | WDR18    | 11.3 | 1.61E-19  | -1.174 | 3  | 131.4 | Q1 |
| IPI00004406; | UPP1     | 41.3 | 2.96E-112 | -1.174 | 11 | 8.5   | Q1 |
| IPI00554711; | JUP      | 29   | 1.17E-256 | -1.173 | 23 | 94.0  | Q1 |
| IPI00007118; | SERPINE1 | 14.7 | 1.61E-27  | -1.157 | 2  | 3.1   | Q1 |
| IPI00296190; | C10orf58 | 27.5 | 3.39E-68  | -1.146 | 8  | 62.8  | Q1 |
| IPI00872929; | APOBEC3C | 32.8 | 2.45E-77  | -1.135 | 8  | 10.2  | Q1 |
| IPI00004233; | MKI67    | 7.5  | 2.01E-50  | -1.101 | 15 | 16.5  | Q1 |
| IPI00294653; | DOPEY2   | 0.6  | 1.82E-03  | -1.091 | 2  | 17.7  | Q1 |
| IPI00298057  | PPL      | 25.7 | 2.21E-294 | -1.072 | 48 | 37.3  | Q1 |
| IPI00028392; | SARG     | 18.1 | 1.77E-35  | -1.046 | 6  | 33.9  | Q1 |
| IPI00433279; | SLFN5    | 14.3 | 7.72E-95  | -1.016 | 12 | 9.9   | Q1 |
| IPI00217468; | HIST1H1B | 22.1 | 7.39E-53  | -1.007 | 6  | 5.8   | Q1 |
| IPI00845319; | EPN3     | 2.6  | 9.80E-08  | -0.978 | 2  | 90.2  | Q1 |
| IPI00465261; | ERAP2    | 13.9 | 9.47E-73  | -0.972 | 8  | 25.5  | Q1 |
| IPI00018364; | RAP2B    | 30.6 | 3.14E-70  | -0.967 | 6  | 12.4  | Q1 |
| IPI00410666; | SCRIB    | 1.5  | 3.33E-07  | -0.965 | 2  | 3.0   | Q1 |
| IPI00908469  | TUBB6    | 33   | <1.0E-304 | -0.944 | 4  | 27.9  | Q1 |
| IPI00816452; | MYO6     | 20.9 | 2.07E-218 | -0.917 | 27 | 5.9   | Q1 |
| IPI00031697; | TMEM109  | 9.1  | 2.25E-20  | -0.896 | 3  | 17.0  | Q1 |
| IPI00013744  | ITGA2    | 26.2 | 1.52E-274 | -0.894 | 28 | 113.7 | Q1 |
| IPI00550364  | PGM2     | 15.2 | 1.63E-58  | -0.881 | 4  | 5.3   | Q1 |
| IPI00470674; | CYB5R1   | 42   | 2.35E-96  | -0.876 | 9  | 3.8   | Q1 |
| IPI00220194; | SLC2A1   | 10.8 | 3.23E-37  | -0.875 | 15 | 9.5   | Q1 |
| IPI00005264; | PKP2     | 21.2 | 3.45E-138 | -0.870 | 17 | 21.8  | Q1 |
| IPI00922476; | EVPL     | 16   | 1.39E-170 | -0.865 | 29 | 12.7  | Q1 |
| IPI00744889; | CDH1     | 2.8  | 2.47E-09  | -0.847 | 2  | 39.6  | Q1 |
| IPI00024307  | EFNB1    | 14.2 | 6.51E-58  | -0.838 | 2  | 8.4   | Q1 |
| IPI00657752; | CD81     | 21.5 | 3.14E-55  | -0.833 | 2  | 9.9   | Q1 |
| IPI00012645; | SPTBN2   | 3.1  | 1.45E-150 | -0.829 | 6  | 34.3  | Q1 |
| IPI00411984; | STK3     | 14.6 | 4.74E-40  | -0.827 | 3  | 14.4  | Q1 |
| IPI00290337  | EPS8     | 1.3  | 8.80E-02  | -0.825 | 2  | 65.1  | Q1 |
| IPI00217477; | HMGB3    | 37   | 9.91E-52  | -0.822 | 3  | 14.7  | Q1 |



|              |          |      |           |        |    |       |    |
|--------------|----------|------|-----------|--------|----|-------|----|
| IPI00060715; | KCTD12   | 31.1 | 3.17E-84  | -0.814 | 3  | 6.5   | Q1 |
| IPI00024993  | ECHS1    | 43.4 | 1.59E-266 | -0.791 | 9  | 14.3  | Q1 |
| IPI00295741; | CTSB     | 25.4 | 6.00E-103 | -0.791 | 8  | 25.7  | Q1 |
| IPI00760846; | MYO18A   | 7.6  | 5.54E-86  | -0.790 | 12 | 5.9   | Q1 |
| IPI00884896; | TXNRD1   | 21.7 | 1.29E-108 | -0.776 | 2  | 1.3   | Q1 |
| IPI00005087; | TMOD3    | 44.3 | 1.38E-300 | -0.776 | 4  | 3.8   | Q1 |
| IPI00168036; | TMEM40   | 17.3 | 2.59E-54  | -0.775 | 4  | 13.8  | Q1 |
| IPI00023549; | GRP      | 30.2 | 1.55E-19  | -0.768 | 3  | 7.2   | Q1 |
| IPI00022479  | HERC1    | 0.7  | 2.67E-05  | -0.756 | 4  | 49.0  | Q1 |
| IPI00020602  | CSNK2A2  | 18.6 | 3.94E-54  | -0.747 | 2  | 91.2  | Q1 |
| IPI00298406; | HADH     | 20   | 3.57E-43  | -0.742 | 6  | 7.3   | Q1 |
| IPI00001883; | SNX9     | 11.6 | 3.55E-48  | -0.740 | 5  | 12.8  | Q1 |
| IPI00221108; | TYMS     | 10.2 | 8.67E-44  | -0.733 | 2  | 25.1  | Q1 |
| IPI00745105; | C16orf13 | 25.5 | 1.04E-39  | -0.729 | 2  | 39.9  | Q1 |
| IPI00015897; | CHORDC1  | 18.7 | 9.62E-62  | -0.725 | 3  | 7.1   | Q1 |
| IPI00293276  | MIF      | 23.5 | 2.09E-17  | -0.719 | 2  | 111.8 | Q1 |
| IPI00217563; | ITGB1    | 26.8 | 9.83E-119 | -0.714 | 40 | 12.7  | Q1 |
| IPI00217121  | C19orf21 | 4.1  | 8.41E-03  | -0.714 | 2  | 75.9  | Q1 |
| IPI00173359; | UACA     | 1.3  | 7.19E-19  | -0.707 | 2  | 78.1  | Q1 |
| IPI00329536  | EEA1     | 19.8 | 3.47E-136 | -0.705 | 24 | 19.1  | Q1 |
| IPI00299402; | PC       | 25   | 1.44E-274 | -0.697 | 24 | 5.3   | Q1 |
| IPI00028031; | ACADVL   | 19.5 | 3.29E-90  | -0.694 | 6  | 8.9   | Q1 |
| IPI00299088; | BAIAP2   | 21.7 | 1.86E-38  | -0.692 | 7  | 117.9 | Q1 |
| IPI00019997; | LIN7C    | 31   | 1.49E-20  | -0.677 | 2  | 3.0   | Q1 |
| IPI00217272; | AACS     | 11.5 | 1.01E-17  | -0.666 | 5  | 29.2  | Q1 |
| IPI00023598; | TUBB4    | 9.7  | <1.0E-304 | -0.662 | 4  | 48.9  | Q1 |
| IPI00219452; | ACOT7    | 43.5 | 3.05E-204 | -0.658 | 7  | 22.8  | Q1 |
| IPI00290043; | ITGA3    | 11   | 3.18E-90  | -0.656 | 13 | 18.3  | Q1 |
| IPI00027981  | RAB38    | 21.2 | 8.73E-36  | -0.655 | 4  | 2.1   | Q1 |
| IPI00883896; | LIMA1    | 41.6 | 1.65E-302 | -0.654 | 26 | 26.8  | Q1 |
| IPI00873344; | TPD52    | 40.7 | 2.39E-111 | -0.649 | 5  | 3.1   | Q1 |
| IPI00218729; | DLG1     | 2.6  | 2.83E-09  | -0.647 | 2  | 43.4  | Q1 |
| IPI00844303; | UNC84A   | 2.3  | 2.65E-04  | -0.644 | 2  | 12.0  | Q1 |

|              |         |      |           |        |    |      |    |
|--------------|---------|------|-----------|--------|----|------|----|
| IPI00218895  | POLR2G  | 18.6 | 2.85E-30  | -0.641 | 2  | 27.5 | Q1 |
| IPI00216219; | TJP1    | 11.4 | 2.42E-97  | -0.635 | 17 | 34.6 | Q1 |
| IPI00061203  | ITPKC   | 2.8  | 3.30E-03  | -0.628 | 2  | 10.0 | Q1 |
| IPI00019463; | EIF2AK2 | 18.1 | 2.12E-56  | -0.627 | 10 | 5.9  | Q1 |
| IPI00472160; | ARHGEF2 | 10.8 | 1.17E-36  | -0.624 | 9  | 15.9 | Q1 |
| IPI00377045; | LAMA3   | 14   | <1.0E-304 | -0.612 | 49 | 35.5 | Q1 |
| IPI00010779; | TPM4    | 46.4 | 1.51E-235 | -0.612 | 16 | 34.9 | Q1 |
| IPI00018314; | SEC14L2 | 22.1 | 1.82E-25  | -0.608 | 2  | 13.0 | Q1 |
| IPI00008215  | ME1     | 11.2 | 6.49E-26  | -0.606 | 2  | 16.4 | Q1 |
| IPI00295485; | HSPA4L  | 15.1 | 2.60E-218 | -0.600 | 9  | 8.9  | Q1 |
| IPI00018415; | TM9SF2  | 6.2  | 3.61E-56  | -0.594 | 3  | 9.1  | Q1 |
| IPI00289876; | STX7    | 29.5 | 6.09E-81  | -0.593 | 4  | 9.3  | Q1 |
| IPI00642211; | RNPEP   | 17.9 | 2.90E-63  | -0.593 | 5  | 9.5  | Q1 |
| IPI00215768  | GCLC    | 4.2  | 4.24E-06  | -0.586 | 2  | 1.2  | Q1 |
| IPI00011836; | USP4    | 2.2  | 1.26E-05  | -0.578 | 2  | 33.7 | Q1 |
| IPI00030774; | TBCD    | 14   | 2.21E-56  | -0.575 | 17 | 7.6  | Q1 |
| IPI00219036  | DICER1  | 1.4  | 9.44E-13  | -0.570 | 2  | 6.6  | Q1 |
| IPI00514501; | C1orf57 | 33.8 | 8.34E-48  | -0.567 | 4  | 3.9  | Q1 |
| IPI00643567  | CAP1    | 9.2  | <1.0E-304 | -0.549 | 2  | 2.8  | Q1 |
| IPI00329719; | MYO1D   | 4.5  | 6.87E-22  | -0.542 | 4  | 2.8  | Q1 |
| IPI00018744; | TRADD   | 10.6 | 8.77E-10  | -0.542 | 2  | 12.3 | Q1 |
| IPI00328350; | FAM129A | 12.6 | 1.12E-75  | -0.534 | 13 | 30.0 | Q1 |
| IPI00410034; | SLC38A2 | 11.9 | 8.71E-40  | -0.530 | 3  | 13.3 | Q1 |
| IPI00023555; | OSBPL3  | 6.2  | 2.53E-88  | -0.530 | 4  | 8.1  | Q1 |
| IPI00216919; | YAP2    | 3.6  | 1.10E-08  | -0.527 | 2  | 3.1  | Q1 |
| IPI00871686; | CLASP2  | 4.3  | 8.08E-83  | -0.527 | 5  | 7.9  | Q1 |
| IPI00926820; | SLC4A7  | 3.7  | 6.54E-66  | -0.527 | 4  | 10.3 | Q1 |
| IPI00893770; | SMTN    | 13.3 | 9.58E-97  | -0.527 | 11 | 20.5 | Q1 |
| IPI00005826  | HERC2   | 1.4  | 5.52E-14  | -0.524 | 6  | 25.5 | Q1 |
| IPI00856116; | PALLD   | 8.8  | 5.37E-61  | -0.521 | 10 | 9.9  | Q1 |
| IPI00013475; | TUBB2A  | 8.1  | <1.0E-304 | -0.519 | 2  | 42.6 | Q1 |
| IPI00015947; | DNAJB1  | 42.9 | 5.81E-93  | -0.517 | 4  | 5.5  | Q1 |
| IPI00008728  | CLPX    | 8.1  | 1.10E-47  | -0.516 | 3  | 16.3 | Q1 |

|              |          |      |           |        |     |      |    |
|--------------|----------|------|-----------|--------|-----|------|----|
| IPI00020557; | LRP1     | 0.8  | 3.21E-12  | -0.514 | 3   | 3.3  | Q1 |
| IPI00550181; | CHMP2B   | 12.7 | 4.25E-15  | -0.512 | 2   | 3.2  | Q1 |
| IPI00009841; | EWSR1    | 5.3  | 5.52E-38  | -0.512 | 2   | 12.4 | Q1 |
| IPI00294472; | TMED5    | 21.4 | 1.82E-36  | -0.512 | 3   | 10.6 | Q1 |
| IPI00019400  | TPMT     | 20.8 | 2.73E-36  | -0.508 | 4   | 6.3  | Q1 |
| IPI00296485  | MAP1S    | 2.4  | 1.06E-24  | -0.508 | 2   | 58.5 | Q1 |
| IPI00291215; | PARP14   | 3.3  | 1.36E-39  | -0.507 | 4   | 9.7  | Q1 |
| IPI00022891; | SLC25A4  | 9.1  | 3.07E-89  | -0.504 | 3   | 29.5 | Q1 |
| IPI00008274; | CAP1     | 61.9 | <1.0E-304 | -0.502 | 17  | 6.4  | Q1 |
| IPI00010187; | ELOVL1   | 4.7  | 4.67E-26  | -0.497 | 2   | 3.2  | Q2 |
| IPI00220154; | MYO5A    | 3.8  | 4.24E-73  | -0.495 | 7   | 16.3 | Q2 |
| IPI00375731; | RBM10    | 2.1  | 4.68E-05  | -0.493 | 2   | 44.5 | Q2 |
| IPI00306048; | ATAD3B   | 6.5  | 4.77E-23  | -0.492 | 2   | 4.6  | Q2 |
| IPI00024705; | GIPC1    | 37.8 | 1.78E-132 | -0.491 | 8   | 9.9  | Q2 |
| IPI00167949; | MX1      | 47.3 | <1.0E-304 | -0.491 | 16  | 9.0  | Q2 |
| IPI00003766  | ETHE1    | 51.2 | 7.33E-126 | -0.488 | 7   | 5.6  | Q2 |
| IPI00013933; | DSP      | 56.1 | <1.0E-304 | -0.484 | 276 | 39.6 | Q2 |
| IPI00017672; | NP       | 76.8 | 4.16E-295 | -0.482 | 30  | 13.3 | Q2 |
| IPI00027280; | TOP2B    | 4.2  | 7.08E-102 | -0.480 | 7   | 10.7 | Q2 |
| IPI00914566; | FDPS     | 20.3 | 1.83E-83  | -0.475 | 2   | 12.1 | Q2 |
| IPI00010882; | DFFA     | 17.5 | 7.42E-15  | -0.469 | 4   | 75.4 | Q2 |
| IPI00216694; | PLS3     | 55.7 | <1.0E-304 | -0.464 | 22  | 21.0 | Q2 |
| IPI00003326; | ARL2     | 23.9 | 6.90E-33  | -0.460 | 5   | 38.7 | Q2 |
| IPI00872610; | CHCHD2   | 26.3 | 2.94E-26  | -0.459 | 2   | 8.4  | Q2 |
| IPI00022810; | CTSC     | 26.6 | 2.11E-272 | -0.458 | 13  | 11.5 | Q2 |
| IPI00024403; | CPNE3    | 25.7 | 2.82E-133 | -0.455 | 2   | 0.2  | Q2 |
| IPI00023673; | LGALS3BP | 12.8 | 1.15E-39  | -0.454 | 5   | 17.5 | Q2 |
| IPI00291646; | MTHFD1L  | 14.3 | 3.08E-75  | -0.450 | 12  | 17.2 | Q2 |
| IPI00174390; | PDE12    | 6.4  | 4.81E-18  | -0.447 | 3   | 3.6  | Q2 |
| IPI00216313; | VSNL1    | 17.8 | 2.20E-10  | -0.445 | 2   | 25.9 | Q2 |
| IPI00654744; | SYNGR2   | 13.8 | 1.66E-11  | -0.443 | 2   | 12.1 | Q2 |
| IPI00009904; | PDIA4    | 47.6 | <1.0E-304 | -0.442 | 23  | 27.2 | Q2 |
| IPI00003843; | TJP2     | 35.1 | 8.89E-278 | -0.441 | 45  | 14.3 | Q2 |

|              |          |      |           |        |    |       |    |
|--------------|----------|------|-----------|--------|----|-------|----|
| IPI00026268; | GNB1     | 13.5 | 2.46E-184 | -0.441 | 2  | 7.8   | Q2 |
| IPI00011107  | IDH2     | 23.2 | 2.71E-60  | -0.441 | 3  | 9.2   | Q2 |
| IPI00021267; | EPHA2    | 12.9 | 5.18E-138 | -0.438 | 12 | 18.7  | Q2 |
| IPI00100154; | TOLLIP   | 25.2 | 1.45E-37  | -0.438 | 5  | 11.9  | Q2 |
| IPI00002349; | NUFIP2   | 7.1  | 5.58E-15  | -0.435 | 4  | 43.6  | Q2 |
| IPI00021327; | GRB2     | 48.4 | 1.33E-44  | -0.432 | 8  | 7.9   | Q2 |
| IPI00439948; | PPP1R13L | 24.5 | 2.02E-110 | -0.431 | 14 | 8.6   | Q2 |
| IPI00257882; | PEPD     | 9.1  | 1.04E-40  | -0.427 | 2  | 1.0   | Q2 |
| IPI00013455; | CLIP1    | 2.2  | 3.09E-08  | -0.426 | 4  | 18.9  | Q2 |
| IPI00028412  | SSSCA1   | 15.1 | 1.31E-04  | -0.423 | 2  | 4.7   | Q2 |
| IPI00215687; | GLS      | 26.4 | 4.10E-81  | -0.422 | 3  | 5.9   | Q2 |
| IPI00294879; | RANGAP1  | 40.4 | <1.0E-304 | -0.419 | 17 | 21.2  | Q2 |
| IPI00550069  | RNH1     | 56.6 | <1.0E-304 | -0.413 | 14 | 11.5  | Q2 |
| IPI00024551; | C15orf24 | 19.4 | 1.65E-06  | -0.409 | 3  | 4.3   | Q2 |
| IPI00295487; | KIF13A   | 3.7  | 2.17E-18  | -0.408 | 6  | 19.9  | Q2 |
| IPI00180954; | CIRBP    | 20.9 | 2.10E-39  | -0.407 | 3  | 8.4   | Q2 |
| IPI00893743; | NRBP1    | 5.7  | 7.94E-09  | -0.405 | 2  | 12.9  | Q2 |
| IPI00015944; | EML2     | 6.6  | 3.03E-29  | -0.405 | 3  | 4.9   | Q2 |
| IPI00020887; | VAMP7    | 18.6 | 6.96E-11  | -0.404 | 2  | 26.1  | Q2 |
| IPI00871372; | HECTD1   | 3    | 2.34E-08  | -0.404 | 9  | 23.2  | Q2 |
| IPI00013890; | SFN      | 67.7 | 2.31E-284 | -0.400 | 36 | 15.1  | Q2 |
| IPI00010080; | OXSR1    | 20.3 | 4.23E-179 | -0.399 | 3  | 51.9  | Q2 |
| IPI00867509; | CORO1C   | 31.3 | 1.03E-220 | -0.398 | 4  | 12.2  | Q2 |
| IPI00174190; | PTPMT1   | 12.4 | 1.32E-33  | -0.398 | 2  | 1.9   | Q2 |
| IPI00024320; | RBM3     | 31.8 | 5.33E-62  | -0.396 | 6  | 9.2   | Q2 |
| IPI00872497; | EI24     | 5.3  | 1.18E-02  | -0.396 | 2  | 13.9  | Q2 |
| IPI00334282; | FAM3C    | 51.1 | 8.26E-215 | -0.394 | 5  | 4.3   | Q2 |
| IPI00414320; | ANXA11   | 27.4 | 2.10E-165 | -0.393 | 6  | 115.2 | Q2 |
| IPI00018434; | TSG101   | 18.2 | 9.04E-32  | -0.391 | 2  | 1.2   | Q2 |
| IPI00294840; | AIM1     | 9.5  | 1.66E-202 | -0.389 | 13 | 8.2   | Q2 |
| IPI00217630; | DHX37    | 2.9  | 4.60E-12  | -0.384 | 3  | 3.4   | Q2 |
| IPI00644231; | CYFIP1   | 26   | 8.54E-223 | -0.382 | 37 | 20.5  | Q2 |
| IPI00328293; | SRRM1    | 5    | 2.43E-19  | -0.381 | 5  | 7.7   | Q2 |

|              |          |      |           |        |     |       |    |
|--------------|----------|------|-----------|--------|-----|-------|----|
| IPI00019345; | RAP1A    | 15.2 | 1.69E-56  | -0.377 | 2   | 8.2   | Q2 |
| IPI00384444; | KRT14    | 81.6 | <1.0E-304 | -0.372 | 335 | 92.1  | Q2 |
| IPI00017292; | CTNNB1   | 21.9 | 1.32E-179 | -0.371 | 16  | 4.6   | Q2 |
| IPI00019869; | S100A2   | 54.1 | 9.02E-141 | -0.371 | 6   | 12.8  | Q2 |
| IPI00299404; | LAMB3    | 47.3 | <1.0E-304 | -0.371 | 66  | 7.0   | Q2 |
| IPI00044748; | FMNL2    | 5.4  | 1.45E-25  | -0.371 | 5   | 5.6   | Q2 |
| IPI00029834; | RTKN     | 9.4  | 2.43E-53  | -0.369 | 4   | 4.7   | Q2 |
| IPI00337530; | REPS1    | 7    | 3.89E-29  | -0.368 | 5   | 18.4  | Q2 |
| IPI00003565; | PSMD10   | 16.4 | 6.48E-13  | -0.367 | 2   | 11.3  | Q2 |
| IPI00382843; | PRNP     | 14.7 | 9.90E-40  | -0.367 | 2   | 7.5   | Q2 |
| IPI00922223; | ATP6V0D1 | 16.8 | 2.97E-49  | -0.366 | 2   | 11.3  | Q2 |
| IPI00658023; | PTPN11   | 3.5  | 1.09E-05  | -0.366 | 2   | 8.9   | Q2 |
| IPI00023647; | UBA6     | 29.4 | 4.55E-278 | -0.365 | 46  | 11.9  | Q2 |
| IPI00018206; | GOT2     | 47.7 | 1.95E-215 | -0.363 | 10  | 8.1   | Q2 |
| IPI00000686; | RBM19    | 2.8  | 6.09E-09  | -0.362 | 3   | 4.0   | Q2 |
| IPI00296909  | PARP4    | 6.6  | 4.63E-74  | -0.362 | 9   | 11.0  | Q2 |
| IPI00328753; | KTN1     | 22.8 | 2.00E-182 | -0.362 | 33  | 43.9  | Q2 |
| IPI00013808; | ACTN4    | 74   | <1.0E-304 | -0.362 | 94  | 12.4  | Q2 |
| IPI00024290; | IRF6     | 29.8 | 1.68E-129 | -0.359 | 3   | 4.7   | Q2 |
| IPI00023510; | RAB5A    | 24.2 | 1.45E-89  | -0.359 | 4   | 10.3  | Q2 |
| IPI00465299; | SLC12A6  | 2.4  | 3.03E-07  | -0.359 | 3   | 8.2   | Q2 |
| IPI00060031  | ARL8A    | 16.7 | 2.12E-62  | -0.357 | 4   | 30.9  | Q2 |
| IPI00000764; | PLEKHM1  | 1.4  | 3.84E-04  | -0.357 | 2   | 8.2   | Q2 |
| IPI00007818; | CPSF3    | 5.4  | 2.55E-08  | -0.356 | 3   | 25.0  | Q2 |
| IPI00296191; | ATP6V1H  | 10.8 | 2.07E-67  | -0.355 | 2   | 0.8   | Q2 |
| IPI00001655; | C16orf80 | 16.6 | 1.69E-37  | -0.354 | 4   | 15.9  | Q2 |
| IPI00607554; | USP47    | 5.1  | 8.54E-59  | -0.353 | 5   | 12.2  | Q2 |
| IPI00218918; | ANXA1    | 78.6 | <1.0E-304 | -0.352 | 44  | 120.4 | Q2 |
| IPI00442073; | CSRP1    | 55.4 | 1.29E-128 | -0.349 | 6   | 7.4   | Q2 |
| IPI00011898; | EIF2B5   | 2.4  | 7.10E-08  | -0.349 | 2   | 1.9   | Q2 |
| IPI00386122; | MOBK13   | 26.2 | 9.96E-18  | -0.348 | 4   | 1.3   | Q2 |
| IPI00030781; | STAT1    | 37.6 | 1.25E-223 | -0.348 | 22  | 12.5  | Q2 |
| IPI00000684; | UAP1     | 24.5 | 2.57E-104 | -0.348 | 4   | 14.4  | Q2 |

|              |         |      |           |        |    |      |    |
|--------------|---------|------|-----------|--------|----|------|----|
| IPI00027803; | PARP9   | 3.6  | 1.41E-19  | -0.346 | 3  | 40.6 | Q2 |
| IPI00300567; | DCI     | 16.9 | 4.35E-46  | -0.346 | 4  | 8.3  | Q2 |
| IPI00513791; | DOCK7   | 4.5  | 1.09E-95  | -0.345 | 7  | 19.7 | Q2 |
| IPI00184363; | GLTP    | 22   | 1.90E-66  | -0.342 | 3  | 11.5 | Q2 |
| IPI00021399  | FGFBP1  | 24.8 | 8.14E-37  | -0.341 | 3  | 4.0  | Q2 |
| IPI00006176; | HGS     | 15.8 | 2.00E-60  | -0.338 | 10 | 11.7 | Q2 |
| IPI00828098; | RNF213  | 0.6  | 2.92E-87  | -0.338 | 2  | 33.5 | Q2 |
| IPI00922855; | TUBGCP2 | 4.9  | 4.86E-20  | -0.338 | 2  | 7.6  | Q2 |
| IPI00024524; | PNO1    | 8.7  | 3.70E-14  | -0.337 | 3  | 17.5 | Q2 |
| IPI00783378; | UBE2O   | 5.1  | 5.16E-42  | -0.336 | 5  | 4.6  | Q2 |
| IPI00299084  | TMEM33  | 30.4 | 3.69E-52  | -0.336 | 10 | 5.0  | Q2 |
| IPI00032905  | VPS33B  | 5.2  | 1.62E-28  | -0.334 | 2  | 11.4 | Q2 |
| IPI00217519; | RALA    | 26.2 | 2.22E-41  | -0.334 | 10 | 14.7 | Q2 |
| IPI00514587; | SARS    | 29.7 | 3.99E-83  | -0.334 | 5  | 46.1 | Q2 |
| IPI00015117; | LAMC2   | 47   | <1.0E-304 | -0.331 | 57 | 11.6 | Q2 |
| IPI00018946; | PANK4   | 3.3  | 7.70E-12  | -0.330 | 2  | 11.9 | Q2 |
| IPI00748145; | GNAI2   | 49   | 1.43E-188 | -0.330 | 6  | 19.0 | Q2 |
| IPI00017895; | GPD2    | 26   | 4.40E-110 | -0.329 | 9  | 17.4 | Q2 |
| IPI00294739; | SAMHD1  | 6.5  | 1.74E-57  | -0.329 | 2  | 7.9  | Q2 |
| IPI00014377  | RAB32   | 30.2 | 1.87E-34  | -0.328 | 3  | 13.3 | Q2 |
| IPI00034006; | PTPN23  | 2.6  | 8.71E-11  | -0.327 | 4  | 26.2 | Q2 |
| IPI00784320; | FAM83H  | 37.4 | <1.0E-304 | -0.326 | 38 | 39.9 | Q2 |
| IPI00436705  | MORC3   | 2.3  | 2.48E-02  | -0.323 | 2  | 6.5  | Q2 |
| IPI00020472; | TMEM111 | 18.4 | 9.71E-72  | -0.323 | 3  | 8.5  | Q2 |
| IPI00409684; | NCKAP1  | 17.2 | 4.56E-94  | -0.323 | 22 | 9.8  | Q2 |
| IPI00006907; | TIGAR   | 37.4 | 6.68E-123 | -0.323 | 4  | 7.0  | Q2 |
| IPI00013877; | HNRNPH3 | 30.9 | 1.80E-120 | -0.321 | 14 | 9.9  | Q2 |
| IPI00797384; | LARP4   | 7.4  | 1.71E-15  | -0.321 | 5  | 18.0 | Q2 |
| IPI00871890; | PICALM  | 14.8 | 4.56E-154 | -0.320 | 5  | 9.0  | Q2 |
| IPI00154473; | GFM1    | 12.1 | 1.35E-63  | -0.319 | 6  | 31.6 | Q2 |
| IPI00020178; | STAM    | 3.9  | 7.81E-26  | -0.318 | 2  | 14.4 | Q2 |
| IPI00927647; | POR     | 11.5 | 6.71E-24  | -0.315 | 5  | 24.7 | Q2 |
| IPI00006713; | DNAJC3  | 19   | 3.03E-62  | -0.314 | 2  | 17.5 | Q2 |

|              |          |      |           |        |    |       |    |
|--------------|----------|------|-----------|--------|----|-------|----|
| IPI00333143; | DGKA     | 23.5 | 4.49E-220 | -0.313 | 13 | 7.5   | Q2 |
| IPI00219757; | GSTP1    | 67.1 | <1.0E-304 | -0.313 | 30 | 72.7  | Q2 |
| IPI00783313; | PYGL     | 40.9 | <1.0E-304 | -0.311 | 39 | 7.7   | Q2 |
| IPI00026445; | POLR1B   | 5.8  | 1.24E-35  | -0.311 | 5  | 6.2   | Q2 |
| IPI00397366; | PPFIBP1  | 15.3 | 2.65E-124 | -0.311 | 16 | 6.2   | Q2 |
| IPI00220739; | PGRMC1   | 34.9 | 9.94E-107 | -0.309 | 5  | 18.8  | Q2 |
| IPI00073096; | TRIM29   | 26.9 | 3.78E-62  | -0.308 | 9  | 5.5   | Q2 |
| IPI00339384; | RDH11    | 35.5 | 5.93E-113 | -0.307 | 6  | 5.7   | Q2 |
| IPI00003269  | ACTBL2   | 8.5  | 1.84E-100 | -0.306 | 4  | 27.0  | Q2 |
| IPI00000070; | LDLR     | 21.5 | 6.24E-160 | -0.305 | 23 | 14.7  | Q2 |
| IPI00913873; | ECD      | 3.5  | 1.43E-05  | -0.304 | 2  | 2.7   | Q2 |
| IPI00640092; | SH3PXD2A | 3.9  | 1.16E-32  | -0.303 | 4  | 12.0  | Q2 |
| IPI00480056; | RAB4A    | 37.2 | 1.70E-67  | -0.303 | 5  | 10.8  | Q2 |
| IPI00220014; | IDI1     | 25.4 | 4.31E-75  | -0.302 | 7  | 4.1   | Q2 |
| IPI00004358; | PYGB     | 60.3 | <1.0E-304 | -0.301 | 53 | 14.7  | Q2 |
| IPI00011126; | PSMC1    | 33   | 6.84E-203 | -0.300 | 4  | 13.3  | Q2 |
| IPI00743335; | MYO1C    | 37.1 | <1.0E-304 | -0.299 | 33 | 16.0  | Q2 |
| IPI00178187; | EHBP1    | 7.9  | 1.54E-53  | -0.299 | 8  | 29.7  | Q2 |
| IPI00329596; | TMX2     | 12.1 | 1.17E-24  | -0.299 | 4  | 6.3   | Q2 |
| IPI00604464; | UBE3C    | 3.2  | 6.76E-16  | -0.298 | 4  | 16.3  | Q2 |
| IPI00018522; | PRMT1    | 47.2 | 2.88E-237 | -0.298 | 6  | 15.9  | Q2 |
| IPI00003348; | GNB2     | 27.9 | 1.63E-164 | -0.295 | 5  | 26.3  | Q2 |
| IPI00163849; | EPS15L1  | 3.5  | 1.02E-37  | -0.295 | 3  | 6.8   | Q2 |
| IPI00872773; | ERO1L    | 40   | 1.63E-212 | -0.292 | 5  | 11.0  | Q2 |
| IPI00291467; | SLC25A6  | 20.5 | 1.26E-128 | -0.291 | 9  | 52.0  | Q2 |
| IPI00029629  | TRIM25   | 21.7 | 7.30E-143 | -0.291 | 7  | 11.9  | Q2 |
| IPI00010586; | TMF1     | 6.4  | 4.39E-38  | -0.291 | 6  | 9.8   | Q2 |
| IPI00922240  | ACTB     | 9.8  | <1.0E-304 | -0.288 | 9  | 131.6 | Q2 |
| IPI00329572; | PACSIN3  | 8.3  | 7.23E-23  | -0.287 | 3  | 5.8   | Q2 |
| IPI00027422; | ITGB4    | 29.4 | <1.0E-304 | -0.286 | 74 | 16.6  | Q2 |
| IPI00926109; | DHX30    | 14.6 | 3.50E-86  | -0.285 | 16 | 6.4   | Q2 |
| IPI00182540; | CTNND1   | 29.5 | 2.70E-299 | -0.285 | 29 | 43.8  | Q2 |
| IPI00019971; | STXBP2   | 11.4 | 1.20E-23  | -0.283 | 4  | 12.1  | Q2 |

|              |          |      |           |        |    |       |    |
|--------------|----------|------|-----------|--------|----|-------|----|
| IPI00449049; | PARP1    | 23.4 | 2.46E-156 | -0.283 | 28 | 9.7   | Q2 |
| IPI00023006; | ACTC1    | 4.2  | 5.11E-170 | -0.281 | 9  | 6.4   | Q2 |
| IPI00029737; | ACSL4    | 14.2 | 1.24E-75  | -0.279 | 7  | 15.1  | Q2 |
| IPI00299635; | BIRC6    | 6    | 4.38E-71  | -0.274 | 26 | 10.6  | Q2 |
| IPI00002424  | PLEKHF2  | 4    | 5.29E-03  | -0.273 | 3  | 67.9  | Q2 |
| IPI00009320; | TMEM85   | 26.8 | 1.34E-64  | -0.273 | 2  | 6.1   | Q2 |
| IPI00419373; | HNRNPA3  | 31.5 | 8.85E-218 | -0.272 | 7  | 242.2 | Q2 |
| IPI00013174; | RBM14    | 12.3 | 2.87E-25  | -0.268 | 7  | 22.2  | Q2 |
| IPI00030702; | IDH3A    | 40.7 | 9.95E-126 | -0.268 | 10 | 20.4  | Q2 |
| IPI00180154; | ATXN2    | 3    | 3.58E-14  | -0.266 | 3  | 11.0  | Q2 |
| IPI00015351; | C1orf128 | 16.6 | 2.82E-08  | -0.264 | 3  | 7.8   | Q2 |
| IPI00394758; | ALDH3A2  | 12.6 | 2.46E-57  | -0.264 | 2  | 2.7   | Q2 |
| IPI00025815; | TARDBP   | 10.8 | 2.59E-30  | -0.263 | 2  | 8.8   | Q2 |
| IPI00008475; | HMGCS1   | 44.2 | <1.0E-304 | -0.261 | 9  | 10.9  | Q2 |
| IPI00929268; | UTP20    | 5.9  | 4.20E-45  | -0.260 | 17 | 8.6   | Q2 |
| IPI00216134; | TPM1     | 28.2 | 3.03E-70  | -0.259 | 6  | 14.7  | Q2 |
| IPI00007812; | ATP6V1B2 | 25   | 1.46E-122 | -0.259 | 3  | 1.3   | Q2 |
| IPI00029046; | MLEC     | 17.8 | 6.28E-39  | -0.258 | 2  | 1.1   | Q2 |
| IPI00178750; | NIP30    | 9.8  | 2.18E-39  | -0.258 | 2  | 27.9  | Q2 |
| IPI00376025; | DHRS4    | 6.8  | 3.89E-06  | -0.258 | 2  | 11.6  | Q2 |
| IPI00009315  | ACBD3    | 4.4  | 7.78E-03  | -0.258 | 2  | 0.4   | Q2 |
| IPI00916904; | GIGYF2   | 10.2 | 1.11E-94  | -0.256 | 11 | 12.8  | Q2 |
| IPI00026216; | NPEPPS   | 28.4 | 3.89E-130 | -0.256 | 23 | 5.1   | Q2 |
| IPI00016342; | RAB7A    | 85   | 7.10E-230 | -0.256 | 25 | 11.2  | Q2 |
| IPI00910513; | GSPT1    | 18.2 | 2.30E-69  | -0.256 | 7  | 14.6  | Q2 |
| IPI00444945; | BAX      | 34.4 | 1.17E-161 | -0.255 | 7  | 18.3  | Q2 |
| IPI00007188  | SLC25A5  | 50.7 | 1.07E-172 | -0.255 | 34 | 57.6  | Q2 |
| IPI00219675; | RAC1     | 48.3 | 1.04E-154 | -0.255 | 17 | 15.1  | Q2 |
| IPI00031812; | YBX1     | 43.8 | 9.88E-243 | -0.255 | 5  | 11.1  | Q2 |
| IPI00411426; | VPS26A   | 37   | 4.93E-115 | -0.255 | 3  | 5.1   | Q2 |
| IPI00031023; | FLII     | 24.5 | 3.71E-238 | -0.254 | 32 | 9.3   | Q2 |
| IPI00103940  | MFS10    | 2.9  | 2.64E-11  | -0.254 | 2  | 3.5   | Q2 |
| IPI00014197; | CDV3     | 14   | 4.80E-37  | -0.253 | 3  | 19.4  | Q2 |



|              |                |      |           |        |     |      |    |
|--------------|----------------|------|-----------|--------|-----|------|----|
| IPI00166079; | VKORC1L1       | 10.8 | 7.68E-04  | -0.252 | 2   | 6.1  | Q2 |
| IPI00396321  | LRRCS9         | 42   | <1.0E-304 | -0.252 | 15  | 7.4  | Q2 |
| IPI00794402; | ARHGDI1        | 37.3 | 2.31E-243 | -0.250 | 11  | 5.1  | Q2 |
| IPI00014577; | RAB18          | 51   | 9.01E-144 | -0.249 | 12  | 8.2  | Q2 |
| IPI00787827; | PITRM1         | 13.4 | 2.69E-42  | -0.249 | 9   | 25.5 | Q2 |
| IPI00015148; | RAP1B          | 41.8 | 1.19E-102 | -0.248 | 8   | 7.3  | Q2 |
| IPI00016746; | CBFB           | 23.6 | 1.04E-85  | -0.247 | 3   | 20.9 | Q2 |
| IPI00012512; | RRAS2          | 35.7 | 3.74E-93  | -0.247 | 5   | 5.4  | Q2 |
| IPI00007001; | MRPL11         | 46.9 | 2.06E-43  | -0.247 | 5   | 11.2 | Q2 |
| IPI00411705; | CLLD6          | 18.4 | 1.27E-09  | -0.247 | 3   | 4.0  | Q2 |
| IPI00152658; | NEK7           | 16.2 | 3.63E-09  | -0.245 | 2   | 19.1 | Q2 |
| IPI00292134; | EPS15          | 2.8  | 7.53E-05  | -0.245 | 4   | 23.0 | Q2 |
| IPI00020944; | FDFT1          | 41   | 1.63E-204 | -0.244 | 7   | 11.2 | Q2 |
| IPI00221012; | USP9X          | 5.6  | 2.95E-45  | -0.243 | 13  | 11.7 | Q2 |
| IPI00418169; | DKFZp686P03159 | 74.2 | <1.0E-304 | -0.242 | 95  | 46.7 | Q2 |
| IPI00005740; | COX4NB         | 29   | 9.08E-29  | -0.240 | 5   | 10.5 | Q2 |
| IPI00026337; | RANBP3         | 8.8  | 2.09E-36  | -0.240 | 3   | 2.2  | Q2 |
| IPI00019899; | SC4MOL         | 11.3 | 5.52E-44  | -0.240 | 2   | 15.2 | Q2 |
| IPI00796891; | GOLGB1         | 11.1 | 9.88E-171 | -0.239 | 41  | 19.0 | Q2 |
| IPI00102864; | HK2            | 14.4 | 1.51E-138 | -0.239 | 11  | 11.8 | Q2 |
| IPI00021983; | NCSTN          | 7.2  | 1.48E-21  | -0.236 | 7   | 25.8 | Q2 |
| IPI00554521; | FTH1           | 46.4 | 8.78E-49  | -0.234 | 6   | 30.1 | Q2 |
| IPI00301618  | SDCCAG1        | 4    | 5.90E-18  | -0.233 | 5   | 9.6  | Q2 |
| IPI00927614; | GOLGA4         | 2.3  | 7.65E-31  | -0.233 | 4   | 12.2 | Q2 |
| IPI00017344; | RAB5B          | 24.2 | 9.37E-80  | -0.231 | 2   | 7.3  | Q2 |
| IPI00290279; | ADK            | 29.8 | 1.41E-95  | -0.231 | 3   | 7.7  | Q2 |
| IPI00003856; | ATP6V1E1       | 34.5 | 5.88E-50  | -0.230 | 4   | 9.5  | Q2 |
| IPI00014456; | STRN           | 6.3  | 1.40E-26  | -0.229 | 4   | 1.6  | Q2 |
| IPI00002552; | AP1M2          | 8.7  | 1.80E-11  | -0.227 | 2   | 9.1  | Q2 |
| IPI00306518; | FANCI          | 2.5  | 1.73E-29  | -0.226 | 3   | 21.3 | Q2 |
| IPI00009867; | KRT5           | 46.8 | <1.0E-304 | -0.226 | 194 | 64.2 | Q2 |
| IPI00007309; | TIMM23         | 26.3 | 5.99E-129 | -0.225 | 4   | 2.5  | Q2 |
| IPI00003965; | USP7           | 22.3 | 1.26E-57  | -0.225 | 25  | 15.6 | Q2 |

|              |            |      |           |        |    |       |    |
|--------------|------------|------|-----------|--------|----|-------|----|
| IPI00176903; | PTRF       | 22.3 | 6.86E-246 | -0.224 | 7  | 6.0   | Q2 |
| IPI00002580  | PIK3C2A    | 1.5  | 3.54E-20  | -0.223 | 2  | 1.7   | Q2 |
| IPI00395605; | ARHGEF1    | 11.5 | 8.53E-84  | -0.223 | 11 | 6.1   | Q2 |
| IPI00007755; | RAB21      | 39.1 | 7.23E-115 | -0.223 | 6  | 4.8   | Q2 |
| IPI00304754; | FERMT1     | 25.7 | 2.15E-118 | -0.223 | 9  | 18.2  | Q2 |
| IPI00744711; | PNPT1      | 9.8  | 8.63E-11  | -0.222 | 4  | 4.4   | Q2 |
| IPI00412344; | SRPK1      | 7.3  | 6.79E-25  | -0.222 | 3  | 9.2   | Q2 |
| IPI00299904; | MCM7       | 20.3 | 1.32E-86  | -0.219 | 11 | 8.2   | Q2 |
| IPI00006451; | NSF        | 6.9  | 1.19E-08  | -0.219 | 2  | 3.6   | Q2 |
| IPI00644697; | HEBP2      | 35   | 1.01E-110 | -0.218 | 4  | 5.7   | Q2 |
| IPI00024821; | PSMD14     | 43.5 | 2.29E-56  | -0.217 | 4  | 12.4  | Q2 |
| IPI00215777; | SLC25A3    | 45.4 | 2.07E-221 | -0.217 | 20 | 8.2   | Q2 |
| IPI00217943; | RAB6A      | 62.5 | 5.09E-93  | -0.215 | 14 | 5.1   | Q2 |
| IPI00373869; | C17orf49   | 24.5 | 5.53E-52  | -0.215 | 3  | 5.2   | Q2 |
| IPI00028481; | RAB8A      | 33.8 | 1.14E-97  | -0.212 | 10 | 16.5  | Q2 |
| IPI00102059; | SCYL1      | 4.3  | 1.09E-04  | -0.211 | 3  | 6.2   | Q2 |
| IPI00642984; | BCAP31     | 25.9 | 3.92E-62  | -0.210 | 11 | 92.0  | Q2 |
| IPI00923468; | SMARCA4    | 2.1  | 1.03E-07  | -0.208 | 2  | 2.1   | Q2 |
| IPI00921873; | NEDD4      | 3.4  | 9.99E-45  | -0.208 | 3  | 3.7   | Q2 |
| IPI00028946; | RTN3       | 15.3 | 3.43E-18  | -0.207 | 4  | 12.6  | Q2 |
| IPI00216457; | HIST2H2AA3 | 62.3 | 1.91E-91  | -0.206 | 19 | 191.2 | Q2 |
| IPI00027434; | RHOC       | 23.3 | 5.12E-220 | -0.204 | 2  | 1.2   | Q2 |
| IPI00021405; | LMNA       | 65.4 | <1.0E-304 | -0.204 | 51 | 8.8   | Q2 |
| IPI00168388; | SRP68      | 17.9 | 1.26E-63  | -0.204 | 5  | 9.0   | Q2 |
| IPI00166555; | RBM26      | 2.4  | 4.62E-02  | -0.204 | 3  | 6.6   | Q2 |
| IPI00301202; | MAGT1      | 7.4  | 9.99E-10  | -0.203 | 2  | 6.0   | Q2 |
| IPI00845479; | CUGBP2     | 3.1  | 1.36E-07  | -0.202 | 2  | 0.8   | Q2 |
| IPI00026089; | SF3B1      | 28   | 2.62E-190 | -0.202 | 34 | 9.3   | Q2 |
| IPI00791086; | EIF3D      | 18.8 | 2.25E-177 | -0.202 | 7  | 3.9   | Q2 |
| IPI00329583; | SPATA5     | 2.9  | 6.40E-17  | -0.200 | 2  | 4.0   | Q2 |
| IPI00218620; | SON        | 5.2  | 7.40E-67  | -0.200 | 9  | 11.8  | Q2 |
| IPI00796337; | PCBP2      | 21.6 | 2.90E-190 | -0.199 | 6  | 12.7  | Q2 |
| IPI00177509  | TRAPPC5    | 23.9 | 2.05E-09  | -0.199 | 4  | 5.0   | Q2 |

|              |              |      |           |        |    |       |    |
|--------------|--------------|------|-----------|--------|----|-------|----|
| IPI00553131; | GALE         | 35.6 | 2.01E-78  | -0.199 | 6  | 7.7   | Q2 |
| IPI00246058; | PDCD6IP      | 42.2 | <1.0E-304 | -0.199 | 41 | 62.8  | Q2 |
| IPI00218728; | PAFAH1B1     | 20.2 | 6.13E-78  | -0.198 | 2  | 15.6  | Q2 |
| IPI00479262; | EIF4G1       | 26.7 | <1.0E-304 | -0.198 | 68 | 16.0  | Q2 |
| IPI00216719; | ERC1         | 20.3 | 2.44E-107 | -0.198 | 23 | 6.5   | Q2 |
| IPI00873459; | 10-Sep       | 13.8 | 6.20E-41  | -0.197 | 2  | 12.7  | Q2 |
| IPI00478231; | RHOA         | 59.6 | 4.08E-243 | -0.197 | 23 | 10.8  | Q2 |
| IPI00026952  | PKP3         | 42.9 | <1.0E-304 | -0.196 | 26 | 9.0   | Q2 |
| IPI00647286; | C9orf88      | 30.6 | 3.63E-228 | -0.195 | 18 | 5.1   | Q2 |
| IPI00014149  | TTC35        | 30.3 | 1.54E-143 | -0.195 | 6  | 10.5  | Q2 |
| IPI00174962; | MICALL1      | 9.8  | 4.09E-29  | -0.194 | 7  | 16.4  | Q2 |
| IPI00107693; | MED15        | 3.7  | 2.52E-05  | -0.194 | 2  | 14.2  | Q2 |
| IPI00103884; | OVCA2        | 23.8 | 5.56E-41  | -0.194 | 4  | 160.7 | Q2 |
| IPI00011274; | HNRPDL       | 18.8 | 4.52E-171 | -0.194 | 4  | 20.7  | Q2 |
| IPI00419237; | LAP3         | 41   | 1.77E-179 | -0.194 | 2  | 1.3   | Q2 |
| IPI00784614; | Ov/Br septin | 33.4 | 5.81E-240 | -0.194 | 18 | 27.5  | Q2 |
| IPI00296526; | NAGK         | 40.3 | 4.02E-187 | -0.193 | 9  | 6.1   | Q2 |
| IPI00307359; | OSBPL9       | 2.7  | 1.56E-05  | -0.192 | 3  | 13.0  | Q2 |
| IPI00333010; | CHERP        | 7.8  | 5.79E-29  | -0.191 | 7  | 12.0  | Q2 |
| IPI00000005  | NRAS         | 39.2 | 2.94E-54  | -0.190 | 5  | 6.0   | Q2 |
| IPI00033600; | PPP1R7       | 25.6 | 2.06E-109 | -0.190 | 3  | 3.2   | Q2 |
| IPI00300096; | RAB35        | 24.9 | 8.11E-33  | -0.189 | 3  | 6.7   | Q2 |
| IPI00289758; | CAPN2        | 35.3 | 4.69E-300 | -0.188 | 17 | 105.6 | Q2 |
| IPI00328913; | VPS28        | 37.3 | 3.54E-102 | -0.187 | 6  | 4.9   | Q2 |
| IPI00298558; | PDCD10       | 41   | 1.45E-104 | -0.186 | 7  | 13.9  | Q2 |
| IPI00027993  | RAB25        | 19.2 | 5.10E-23  | -0.185 | 4  | 14.9  | Q2 |
| IPI00450768; | KRT17        | 66   | <1.0E-304 | -0.184 | 89 | 74.5  | Q2 |
| IPI00911038  | MYH9         | 4.8  | 7.36E-23  | -0.184 | 6  | 5.5   | Q2 |
| IPI00182757; | KIAA1967     | 19   | 5.92E-96  | -0.181 | 20 | 10.1  | Q2 |
| IPI00075081; | FANCD2       | 1.4  | 7.23E-07  | -0.181 | 2  | 9.0   | Q2 |
| IPI00178150; | KIF4A        | 2.7  | 2.35E-11  | -0.180 | 3  | 4.3   | Q2 |
| IPI00143753; | SR140        | 15.5 | 2.63E-168 | -0.180 | 17 | 15.0  | Q2 |
| IPI00017375; | SEC23A       | 20.8 | 3.48E-203 | -0.179 | 8  | 16.1  | Q2 |

|              |          |      |           |        |    |      |    |
|--------------|----------|------|-----------|--------|----|------|----|
| IPI00294619; | TFG      | 17   | 1.02E-31  | -0.178 | 3  | 29.2 | Q2 |
| IPI00873622; | WDR1     | 29.3 | 1.50E-158 | -0.178 | 11 | 7.8  | Q2 |
| IPI00014263  | EIF4H    | 53.6 | 5.68E-157 | -0.178 | 14 | 6.6  | Q2 |
| IPI00032561; | CAB39    | 41.6 | 7.89E-78  | -0.177 | 5  | 6.6  | Q2 |
| IPI00642584; | KIAA0090 | 12.4 | 1.98E-89  | -0.177 | 9  | 4.7  | Q2 |
| IPI00793199; | ANXA4    | 61.1 | 4.33E-267 | -0.176 | 25 | 5.9  | Q2 |
| IPI00068506; | ABCF2    | 14   | 3.32E-40  | -0.175 | 7  | 69.9 | Q2 |
| IPI00221106; | SF3B2    | 21.6 | 1.29E-152 | -0.174 | 25 | 9.1  | Q2 |
| IPI00028957; | UBE4A    | 3.5  | 3.08E-16  | -0.174 | 3  | 6.8  | Q2 |
| IPI00007676; | HSD17B12 | 41   | 1.72E-109 | -0.174 | 14 | 5.9  | Q2 |
| IPI00019407; | NSDHL    | 22.8 | 1.38E-38  | -0.173 | 5  | 7.9  | Q2 |
| IPI00783271; | LRPPRC   | 48.1 | <1.0E-304 | -0.172 | 84 | 7.3  | Q2 |
| IPI00005719; | RAB1A    | 70.2 | 7.18E-269 | -0.172 | 25 | 34.6 | Q2 |
| IPI00293026; | EFTUD1   | 19.3 | 2.04E-109 | -0.172 | 21 | 11.2 | Q2 |
| IPI00002804; | PKN2     | 9.1  | 5.38E-41  | -0.171 | 9  | 13.0 | Q2 |
| IPI00465432; | NOMO2    | 19.3 | 1.84E-173 | -0.171 | 23 | 5.8  | Q2 |
| IPI00015773; | COMMD3   | 14.4 | 1.30E-07  | -0.171 | 2  | 3.9  | Q2 |
| IPI00385267  | SRPR     | 15.5 | 9.86E-87  | -0.170 | 9  | 5.9  | Q2 |
| IPI00171798  | MTA2     | 10.3 | 4.16E-07  | -0.169 | 8  | 8.3  | Q2 |
| IPI00016513  | RAB10    | 50   | 6.51E-111 | -0.169 | 13 | 4.6  | Q2 |
| IPI00402657; | RPAP1    | 3.7  | 3.91E-26  | -0.169 | 4  | 3.9  | Q2 |
| IPI00300074  | FARSB    | 37   | 2.11E-109 | -0.169 | 14 | 12.1 | Q2 |
| IPI00873435; | UBE2G1   | 9.7  | 1.09E-21  | -0.169 | 3  | 10.9 | Q2 |
| IPI00409671; | DDX42    | 10.2 | 5.20E-42  | -0.168 | 8  | 11.5 | Q2 |
| IPI00017283  | IARS2    | 17.3 | 6.10E-76  | -0.167 | 14 | 13.6 | Q2 |
| IPI00171438; | TXNDC5   | 23.1 | 1.93E-63  | -0.167 | 5  | 10.0 | Q2 |
| IPI00290198  | IL18     | 31.6 | 3.70E-60  | -0.166 | 6  | 4.7  | Q2 |
| IPI00221327; | RTCD1    | 9    | 2.16E-20  | -0.166 | 2  | 10.6 | Q2 |
| IPI00015953; | DDX21    | 45.1 | <1.0E-304 | -0.166 | 40 | 80.1 | Q2 |
| IPI00018350; | MCM5     | 17.8 | 8.02E-81  | -0.165 | 11 | 33.2 | Q2 |
| IPI00012382; | SNRPA    | 15.2 | 3.98E-11  | -0.165 | 3  | 4.0  | Q2 |
| IPI00289601; | HDAC2    | 12.4 | 2.69E-86  | -0.164 | 5  | 7.3  | Q2 |
| IPI00216048; | PITPNA   | 28.5 | 6.15E-24  | -0.164 | 3  | 11.7 | Q2 |

|              |           |      |           |        |     |      |    |
|--------------|-----------|------|-----------|--------|-----|------|----|
| IPI00335849; | RASAL2    | 1.7  | 3.96E-03  | -0.163 | 2   | 9.2  | Q2 |
| IPI00021440; | ACTG1     | 77.3 | <1.0E-304 | -0.163 | 159 | 72.6 | Q2 |
| IPI00008998; | PTPLAD1   | 11.6 | 1.31E-31  | -0.163 | 5   | 6.1  | Q2 |
| IPI00797684; | ESRP1     | 6.9  | 5.54E-24  | -0.162 | 4   | 20.9 | Q2 |
| IPI00026519; | PPIF      | 30   | 6.03E-116 | -0.162 | 7   | 4.5  | Q2 |
| IPI00016339; | RAB5C     | 54.2 | 2.22E-175 | -0.162 | 19  | 9.6  | Q2 |
| IPI00218924; | CHP       | 47.2 | 4.66E-141 | -0.161 | 5   | 94.6 | Q2 |
| IPI00306604  | ITGA5     | 10.5 | 5.89E-126 | -0.160 | 5   | 5.1  | Q2 |
| IPI00032423; | DDX52     | 7.2  | 2.68E-29  | -0.160 | 3   | 49.2 | Q2 |
| IPI00029012  | EIF3A     | 43   | 1.44E-244 | -0.159 | 109 | 10.2 | Q2 |
| IPI00307409; | MRPL9     | 19.1 | 5.17E-23  | -0.159 | 4   | 6.6  | Q2 |
| IPI00294211; | DHX38     | 4.4  | 3.37E-21  | -0.159 | 6   | 7.9  | Q2 |
| IPI00031169; | RAB2A     | 67   | 1.39E-184 | -0.159 | 16  | 3.6  | Q2 |
| IPI00455153; | NFU1      | 26   | 2.06E-27  | -0.157 | 3   | 26.6 | Q2 |
| IPI00785113; | LRRFIP1   | 24.5 | 6.79E-247 | -0.157 | 19  | 4.1  | Q2 |
| IPI00640703; | XPO5      | 19.9 | 2.48E-146 | -0.157 | 21  | 7.9  | Q2 |
| IPI00384689; | PDXDC1    | 8    | 3.47E-99  | -0.157 | 5   | 7.7  | Q2 |
| IPI00790757; | DUSP3     | 26.7 | 1.81E-65  | -0.157 | 3   | 7.2  | Q2 |
| IPI00396279; | CLASP1    | 8    | 4.82E-40  | -0.156 | 12  | 9.1  | Q2 |
| IPI00301323; | DDX18     | 10.7 | 2.02E-20  | -0.156 | 4   | 6.8  | Q2 |
| IPI00030706  | AHSA1     | 40.8 | 1.44E-113 | -0.154 | 6   | 7.6  | Q2 |
| IPI00027505; | ITGAV     | 15.6 | 1.79E-91  | -0.153 | 15  | 9.3  | Q2 |
| IPI00007682  | ATP6V1A   | 32.3 | 3.58E-176 | -0.151 | 11  | 8.0  | Q2 |
| IPI00641788; | SNRPC     | 11.7 | 1.51E-33  | -0.151 | 2   | 5.9  | Q2 |
| IPI00018236  | GM2A      | 22.8 | 7.63E-07  | -0.151 | 4   | 1.8  | Q2 |
| IPI00646015; | ACOT9     | 28.8 | 7.47E-79  | -0.150 | 5   | 15.8 | Q2 |
| IPI00607584; | MYBBP1A   | 24.2 | 7.22E-208 | -0.150 | 34  | 7.7  | Q2 |
| IPI00647650; | EIF3H     | 35.2 | 4.13E-74  | -0.148 | 5   | 8.7  | Q2 |
| IPI00012149; | MPHOSPH10 | 4    | 3.59E-66  | -0.148 | 2   | 7.9  | Q2 |
| IPI00295849; | RABGGTB   | 8.2  | 2.56E-05  | -0.148 | 2   | 5.0  | Q2 |
| IPI00910194; | NUP153    | 4.3  | 3.53E-19  | -0.147 | 6   | 13.2 | Q2 |
| IPI00018871; | ARL8B     | 26.9 | 1.11E-61  | -0.146 | 8   | 21.8 | Q2 |
| IPI00643591; | AP1G1     | 16.6 | 2.08E-70  | -0.146 | 6   | 3.9  | Q2 |

|              |          |      |           |        |    |       |    |
|--------------|----------|------|-----------|--------|----|-------|----|
| IPI00001871  | PAWR     | 11.8 | 9.70E-63  | -0.146 | 3  | 12.9  | Q2 |
| IPI00300299  | SPCS3    | 15   | 1.61E-09  | -0.145 | 5  | 2.5   | Q2 |
| IPI00018931  | VPS35    | 29.9 | 9.49E-261 | -0.145 | 21 | 7.6   | Q2 |
| IPI00014068  | PAK4     | 4.2  | 4.28E-14  | -0.143 | 2  | 18.0  | Q2 |
| IPI00031650; | NUDT16L1 | 23.2 | 3.13E-34  | -0.143 | 3  | 104.4 | Q2 |
| IPI00001568; | ATP6V1D  | 18.2 | 1.04E-50  | -0.142 | 2  | 1.7   | Q2 |
| IPI00414315; | EPS8L2   | 6.6  | 6.33E-83  | -0.142 | 3  | 1.4   | Q2 |
| IPI00877174; | OAS3     | 20   | 4.45E-84  | -0.142 | 14 | 8.2   | Q2 |
| IPI00013297; | PDAP1    | 37.6 | 2.14E-108 | -0.142 | 14 | 10.8  | Q2 |
| IPI00890837; | SMCHD1   | 3.4  | 6.55E-42  | -0.141 | 7  | 7.8   | Q2 |
| IPI00456744; | SH3BP1   | 4.4  | 1.51E-26  | -0.141 | 2  | 21.4  | Q2 |
| IPI00016608; | TMED2    | 23.9 | 1.80E-20  | -0.141 | 4  | 16.0  | Q2 |
| IPI00719051; | EXOC5    | 5.1  | 1.35E-03  | -0.141 | 2  | 3.6   | Q2 |
| IPI00924713; | PCYT1A   | 16.3 | 1.31E-91  | -0.140 | 3  | 10.0  | Q2 |
| IPI00796864; | DPM1     | 32.5 | 1.57E-59  | -0.140 | 6  | 6.0   | Q2 |
| IPI00023064; | HRPAP20  | 45.7 | 3.04E-21  | -0.140 | 6  | 7.3   | Q2 |
| IPI00328415; | CYB5R3   | 45.5 | 6.12E-226 | -0.139 | 12 | 4.9   | Q2 |
| IPI00012795; | EIF3I    | 50.2 | 3.45E-132 | -0.138 | 4  | 6.0   | Q2 |
| IPI00021924  | H1FX     | 18.8 | 2.32E-56  | -0.138 | 3  | 5.9   | Q2 |
| IPI00016669  | RHEB     | 35.9 | 1.25E-17  | -0.138 | 3  | 2.9   | Q2 |
| IPI00827718; | MARK1    | 5.5  | 5.29E-17  | -0.138 | 3  | 40.0  | Q2 |
| IPI00218319; | TPM3     | 72.6 | 3.78E-271 | -0.138 | 35 | 9.4   | Q2 |
| IPI00017184; | EHD1     | 49.8 | 6.35E-202 | -0.138 | 7  | 9.3   | Q2 |
| IPI00873410; | CNN3     | 28.5 | 6.81E-84  | -0.138 | 5  | 6.4   | Q2 |
| IPI00017342  | RHOG     | 45   | 5.19E-155 | -0.138 | 7  | 3.4   | Q2 |
| IPI00019488  | IMP3     | 25   | 2.41E-68  | -0.137 | 3  | 7.1   | Q2 |
| IPI00642032; | TXNL1    | 41.5 | 1.28E-167 | -0.136 | 5  | 2.1   | Q2 |
| IPI00782992; | SRRM2    | 7.6  | 4.24E-77  | -0.136 | 23 | 15.1  | Q2 |
| IPI00016610  | PCBP1    | 39   | 1.53E-254 | -0.135 | 11 | 7.4   | Q2 |
| IPI00215948; | CTNNA1   | 51   | <1.0E-304 | -0.135 | 44 | 7.2   | Q2 |
| IPI00552073; | DHX16    | 8.8  | 6.05E-27  | -0.134 | 8  | 25.3  | Q2 |
| IPI00004324; | TRAPPC3  | 36.1 | 1.75E-38  | -0.133 | 7  | 11.1  | Q2 |
| IPI00291608; | PCNP     | 24.2 | 4.10E-23  | -0.132 | 5  | 7.6   | Q2 |

|              |          |      |           |        |    |      |    |
|--------------|----------|------|-----------|--------|----|------|----|
| IPI00179713; | IGF2BP2  | 28.9 | 8.73E-129 | -0.131 | 10 | 6.5  | Q2 |
| IPI00100656; | GPSN2    | 23.1 | 9.54E-26  | -0.130 | 14 | 6.5  | Q2 |
| IPI00386114; | SF1      | 9.5  | 2.29E-07  | -0.130 | 3  | 2.4  | Q2 |
| IPI00030851; | SEC24B   | 11.4 | 4.56E-207 | -0.130 | 15 | 18.3 | Q2 |
| IPI00219078; | ATP2A2   | 29   | <1.0E-304 | -0.130 | 50 | 12.9 | Q2 |
| IPI00219604; | MAP2K1   | 23.7 | 9.60E-15  | -0.130 | 4  | 5.9  | Q2 |
| IPI00893918; | VARS     | 33.8 | <1.0E-304 | -0.129 | 46 | 7.1  | Q2 |
| IPI00216230  | TMPO     | 14.3 | 5.90E-59  | -0.128 | 7  | 8.0  | Q2 |
| IPI00789155; | CALU     | 41.5 | 9.16E-130 | -0.126 | 2  | 2.0  | Q2 |
| IPI00384489  | AP1B1    | 13.7 | 2.12E-198 | -0.126 | 11 | 8.0  | Q2 |
| IPI00604759; | FAHD1    | 14.5 | 1.96E-42  | -0.126 | 5  | 11.9 | Q2 |
| IPI00027175; | SRI      | 39.9 | 1.53E-42  | -0.125 | 6  | 4.5  | Q2 |
| IPI00514234; | LAD1     | 25.7 | 6.66E-169 | -0.124 | 9  | 23.4 | Q2 |
| IPI00014310; | CUL1     | 5.7  | 1.89E-11  | -0.124 | 4  | 11.4 | Q2 |
| IPI00027223; | IDH1     | 44.2 | 1.10E-236 | -0.123 | 7  | 4.3  | Q2 |
| IPI00011201; | ME2      | 9.2  | 3.56E-63  | -0.122 | 3  | 45.6 | Q2 |
| IPI00448798; | CSNK1A1  | 37.5 | 3.77E-108 | -0.121 | 8  | 19.5 | Q2 |
| IPI00020436; | RAB11B   | 60.6 | 4.17E-166 | -0.121 | 15 | 10.5 | Q2 |
| IPI00215888; | SRP72    | 22.7 | 1.91E-202 | -0.120 | 7  | 7.2  | Q2 |
| IPI00243221; | NRD1     | 18.8 | 8.64E-137 | -0.120 | 24 | 10.1 | Q2 |
| IPI00296432; | IWS1     | 5.1  | 2.09E-13  | -0.120 | 3  | 14.7 | Q2 |
| IPI00021263; | YWHAZ    | 62.9 | <1.0E-304 | -0.120 | 33 | 63.2 | Q2 |
| IPI00017617; | DDX5     | 35.3 | 8.28E-157 | -0.119 | 17 | 9.1  | Q2 |
| IPI00029048; | TTLL12   | 17.7 | 7.45E-59  | -0.119 | 5  | 6.5  | Q2 |
| IPI00411614; | WDHD1    | 16.4 | 4.12E-184 | -0.119 | 16 | 9.4  | Q2 |
| IPI00180267; | C8orf42  | 23.6 | 5.40E-51  | -0.118 | 3  | 8.3  | Q2 |
| IPI00554590; | RAB3GAP2 | 16.2 | 9.46E-91  | -0.117 | 22 | 7.7  | Q2 |
| IPI00654605; | MAP7D1   | 20.2 | 6.31E-63  | -0.117 | 21 | 26.2 | Q2 |
| IPI00028888; | HNRNPD   | 23.7 | 9.63E-134 | -0.117 | 3  | 5.8  | Q2 |
| IPI00215637; | DDX3X    | 40   | 8.49E-293 | -0.117 | 21 | 9.7  | Q2 |
| IPI00009634; | SQRDL    | 48.9 | 4.28E-179 | -0.117 | 11 | 20.8 | Q2 |
| IPI00853598; | SEC13    | 23.1 | 7.10E-138 | -0.116 | 2  | 0.7  | Q2 |
| IPI00395939; | PITPNB   | 59   | 3.11E-122 | -0.116 | 20 | 7.8  | Q2 |

|              |          |      |           |        |    |      |    |
|--------------|----------|------|-----------|--------|----|------|----|
| IPI00022477  | BCL10    | 15   | 4.26E-15  | -0.115 | 2  | 9.7  | Q2 |
| IPI00027415; | DHX36    | 7    | 2.42E-49  | -0.115 | 4  | 12.4 | Q2 |
| IPI00855820; | MON2     | 3.5  | 1.14E-16  | -0.115 | 7  | 19.3 | Q2 |
| IPI00010252; | TRIM33   | 2    | 2.75E-10  | -0.114 | 2  | 9.8  | Q2 |
| IPI00295992; | ATAD3A   | 18.9 | 2.64E-56  | -0.114 | 7  | 9.2  | Q2 |
| IPI00006865  | SEC22B   | 45.1 | 7.00E-169 | -0.113 | 9  | 12.0 | Q2 |
| IPI00157790; | ECM29    | 13.2 | 2.40E-191 | -0.112 | 23 | 9.4  | Q2 |
| IPI00217357  | CCAR1    | 11.4 | 5.79E-116 | -0.111 | 15 | 10.1 | Q2 |
| IPI00438286; | ERBB2IP  | 2.1  | 1.43E-02  | -0.109 | 3  | 13.2 | Q2 |
| IPI00290204; | SNRNP70  | 19.7 | 5.85E-14  | -0.108 | 3  | 10.4 | Q2 |
| IPI00375380; | PSMD13   | 42.1 | 5.80E-176 | -0.108 | 7  | 10.0 | Q2 |
| IPI00219910; | BLVRB    | 38.2 | 1.87E-75  | -0.108 | 7  | 6.9  | Q2 |
| IPI00337386; | PRPF40A  | 12.3 | 1.81E-17  | -0.108 | 11 | 26.7 | Q2 |
| IPI00013723; | PIN1     | 39.9 | 6.32E-125 | -0.108 | 5  | 5.5  | Q2 |
| IPI00000015  | SFRS4    | 3.2  | 5.52E-05  | -0.107 | 2  | 40.2 | Q2 |
| IPI00006079; | BCLAF1   | 5.3  | 6.21E-27  | -0.106 | 5  | 2.5  | Q2 |
| IPI00003627; | ACTL6A   | 11.9 | 1.13E-30  | -0.106 | 2  | 14.0 | Q2 |
| IPI00032808; | RAB3D    | 18.7 | 6.97E-77  | -0.105 | 5  | 9.7  | Q2 |
| IPI00239815; | CIRH1A   | 7.1  | 1.33E-108 | -0.105 | 4  | 3.5  | Q2 |
| IPI00292000; | PRPF31   | 4.6  | 8.75E-19  | -0.105 | 2  | 7.4  | Q2 |
| IPI00427330; | SBDS     | 51.2 | 2.42E-89  | -0.105 | 10 | 4.8  | Q2 |
| IPI00465233; | EIF3EIP  | 34.9 | 9.20E-221 | -0.104 | 12 | 12.9 | Q2 |
| IPI00103026; | PRMT3    | 7.1  | 5.05E-11  | -0.104 | 4  | 15.7 | Q2 |
| IPI00103252; | RWDD4A   | 15.4 | 5.22E-09  | -0.104 | 3  | 2.5  | Q2 |
| IPI00031820; | FARSA    | 25.8 | 1.97E-102 | -0.103 | 6  | 4.2  | Q2 |
| IPI00477763  | CDC42BPB | 1.1  | 1.14E-10  | -0.102 | 2  | 4.3  | Q2 |
| IPI00291200; | NUP133   | 16.3 | 1.20E-179 | -0.102 | 20 | 7.0  | Q2 |
| IPI00010201; | PSMD8    | 20.3 | 9.60E-42  | -0.102 | 5  | 8.9  | Q2 |
| IPI00012837; | KIF5B    | 43   | <1.0E-304 | -0.101 | 51 | 33.7 | Q2 |
| IPI00012833  | PPP4C    | 27   | 9.68E-147 | -0.101 | 6  | 6.4  | Q2 |
| IPI00453473  | HIST1H4A | 53.4 | 2.75E-80  | -0.101 | 18 | 33.1 | Q2 |
| IPI00329331; | UGP2     | 28.5 | 1.23E-206 | -0.100 | 6  | 12.4 | Q2 |
| IPI00023532; | SPATS2L  | 5.3  | 1.71E-07  | -0.100 | 3  | 12.6 | Q2 |



|              |          |      |           |        |     |       |    |
|--------------|----------|------|-----------|--------|-----|-------|----|
| IPI00017367; | RDX      | 22   | 1.91E-162 | -0.100 | 9   | 11.1  | Q2 |
| IPI00032491  | LEMD3    | 4    | 3.89E-15  | -0.099 | 3   | 8.7   | Q2 |
| IPI00107753; | OPA1     | 11.6 | 1.71E-48  | -0.099 | 10  | 8.0   | Q2 |
| IPI00925918; | CCDC12   | 15.1 | 7.93E-06  | -0.099 | 2   | 36.2  | Q2 |
| IPI00185374; | PSMD12   | 36   | 7.56E-154 | -0.099 | 8   | 12.4  | Q2 |
| IPI00004838; | CRK      | 40.8 | 9.05E-114 | -0.099 | 7   | 18.3  | Q2 |
| IPI00020599; | CALR     | 52.5 | 3.01E-268 | -0.098 | 13  | 32.0  | Q2 |
| IPI00922428; | FKBP9    | 5.9  | 1.34E-05  | -0.098 | 2   | 13.6  | Q2 |
| IPI00396485; | EEF1A1   | 62.8 | <1.0E-304 | -0.098 | 107 | 56.3  | Q2 |
| IPI00419258; | HMGB1    | 51.2 | 1.80E-168 | -0.098 | 13  | 13.7  | Q2 |
| IPI00297477; | SNRPA1   | 41.2 | 4.25E-127 | -0.097 | 8   | 5.8   | Q2 |
| IPI00921428; | IMPA1    | 16.1 | 5.46E-32  | -0.097 | 5   | 6.9   | Q2 |
| IPI00106491; | MRTO4    | 33.1 | 7.59E-45  | -0.096 | 6   | 12.7  | Q2 |
| IPI00419575; | C7orf20  | 8.2  | 6.62E-51  | -0.096 | 3   | 40.6  | Q2 |
| IPI00017451; | SF3A1    | 21.4 | 1.70E-101 | -0.096 | 20  | 9.4   | Q2 |
| IPI00477495  | H2BFS    | 75.4 | 3.13E-73  | -0.095 | 44  | 124.1 | Q2 |
| IPI00024934  | MUT      | 4    | 2.75E-09  | -0.094 | 3   | 12.0  | Q2 |
| IPI00012079; | EIF4B    | 24.4 | 5.08E-50  | -0.093 | 11  | 12.1  | Q2 |
| IPI00008422; | SMARCAD1 | 4.1  | 1.54E-14  | -0.093 | 4   | 6.0   | Q2 |
| IPI00329742; | FAHD2A   | 14   | 1.58E-38  | -0.092 | 2   | 0.8   | Q2 |
| IPI00028055; | TMED10   | 32   | 6.27E-115 | -0.092 | 13  | 6.9   | Q2 |
| IPI00792743; | SLTM     | 5.9  | 4.87E-77  | -0.091 | 5   | 11.1  | Q2 |
| IPI00024279; | HEATR1   | 13.5 | 4.90E-143 | -0.091 | 30  | 11.6  | Q2 |
| IPI00296053; | FH       | 28.2 | 4.88E-191 | -0.091 | 4   | 41.9  | Q2 |
| IPI00219953; | CMPK1    | 40.8 | 5.91E-97  | -0.090 | 11  | 10.2  | Q2 |
| IPI00642046; | RSL1D1   | 28   | 8.94E-148 | -0.090 | 8   | 10.1  | Q2 |
| IPI00031627  | POLR2A   | 4.6  | 8.37E-29  | -0.090 | 8   | 2.2   | Q2 |
| IPI00299000; | PA2G4    | 58.9 | 8.07E-269 | -0.089 | 10  | 5.5   | Q2 |
| IPI00025084; | CAPNS1   | 51.9 | 3.51E-204 | -0.087 | 17  | 3.9   | Q2 |
| IPI00004290  | DEF      | 2.2  | 4.33E-02  | -0.087 | 2   | 7.8   | Q2 |
| IPI00013721; | PRPF4B   | 5.1  | 3.09E-14  | -0.087 | 4   | 12.1  | Q2 |
| IPI00003443; | IFI16    | 20.3 | 5.27E-58  | -0.086 | 13  | 10.7  | Q2 |
| IPI00033143  | EIF3K    | 34.4 | 5.83E-118 | -0.086 | 6   | 4.4   | Q2 |

|              |               |      |           |        |    |      |    |
|--------------|---------------|------|-----------|--------|----|------|----|
| IPI00083708; | BAT2D1        | 2.9  | 7.53E-30  | -0.085 | 9  | 22.4 | Q2 |
| IPI00003515  | TRIP11        | 1.8  | 2.22E-08  | -0.085 | 3  | 23.0 | Q2 |
| IPI00332511; | PPP2R2A       | 19.7 | 6.67E-82  | -0.085 | 4  | 10.8 | Q2 |
| IPI00031064  | TMEM126A      | 29.2 | 6.46E-50  | -0.085 | 3  | 2.2  | Q2 |
| IPI00019450; | TROVE2        | 11.7 | 2.53E-58  | -0.085 | 4  | 8.6  | Q2 |
| IPI00029056; | SEPHS1        | 11.7 | 6.86E-20  | -0.085 | 3  | 3.6  | Q2 |
| IPI00020416; | TPP2          | 30.6 | <1.0E-304 | -0.084 | 36 | 7.1  | Q2 |
| IPI00382452; | CHMP1A        | 26.5 | 2.67E-09  | -0.084 | 3  | 3.5  | Q2 |
| IPI00792788; | DOCK5         | 2.1  | 4.38E-15  | -0.084 | 4  | 11.6 | Q2 |
| IPI00743594; | ANLN          | 13.4 | 2.49E-35  | -0.084 | 16 | 15.4 | Q2 |
| IPI00784414; | STAT3         | 15.1 | 9.58E-62  | -0.084 | 7  | 9.5  | Q2 |
| IPI00550451; | PPP1CA        | 49.1 | 2.37E-290 | -0.084 | 7  | 13.7 | Q2 |
| IPI00056357  | C19orf10      | 37   | 6.53E-49  | -0.084 | 3  | 13.7 | Q2 |
| IPI00909195; | HN1L          | 36.2 | 1.37E-111 | -0.083 | 6  | 7.0  | Q2 |
| IPI00031554  | DDX50         | 4.5  | 2.22E-31  | -0.082 | 2  | 3.2  | Q2 |
| IPI00007928; | PRPF8         | 27.9 | <1.0E-304 | -0.082 | 71 | 9.1  | Q2 |
| IPI00105598; | PSMD11        | 55.6 | 4.66E-218 | -0.082 | 18 | 20.8 | Q2 |
| IPI00014232; | ARL6IP1       | 6.9  | 4.40E-02  | -0.081 | 2  | 5.8  | Q2 |
| IPI00021417; | SART1         | 12.4 | 1.90E-22  | -0.081 | 8  | 5.1  | Q2 |
| IPI00788907; | PGAM5         | 42.2 | 1.09E-59  | -0.081 | 10 | 17.6 | Q2 |
| IPI00418497; | TIMM50        | 15.4 | 3.21E-83  | -0.081 | 2  | 28.3 | Q2 |
| IPI00232533; | EIF1AX        | 45.8 | 3.42E-45  | -0.080 | 9  | 9.8  | Q2 |
| IPI00021147  | DEGS1         | 5    | 5.45E-56  | -0.080 | 2  | 6.4  | Q2 |
| IPI00010796; | P4HB          | 56.5 | 6.12E-209 | -0.080 | 16 | 16.4 | Q2 |
| IPI00002926; | VPS37B        | 34.7 | 1.46E-150 | -0.080 | 5  | 6.5  | Q2 |
| IPI00297211  | SMARCA5       | 29.5 | 2.77E-176 | -0.079 | 35 | 19.0 | Q2 |
| IPI00375677; | MRPL21        | 19.6 | 3.28E-11  | -0.079 | 2  | 7.3  | Q2 |
| IPI00141561; | COG1          | 1.9  | 3.15E-03  | -0.078 | 2  | 52.0 | Q2 |
| IPI00290460; | EIF3G         | 35   | 1.32E-88  | -0.078 | 6  | 7.5  | Q2 |
| IPI00177728; | CNDP2         | 52.2 | <1.0E-304 | -0.078 | 4  | 11.0 | Q2 |
| IPI00844264; | DKFZp779B0247 | 25.1 | 1.90E-263 | -0.077 | 20 | 9.2  | Q2 |
| IPI00171903; | HNRNPM        | 53.4 | <1.0E-304 | -0.077 | 30 | 7.7  | Q2 |
| IPI00291093  | POLR2E        | 40.5 | 2.77E-112 | -0.077 | 7  | 28.6 | Q2 |

|              |          |      |           |        |    |      |    |
|--------------|----------|------|-----------|--------|----|------|----|
| IPI00329672; | MYO1E    | 27.2 | 1.13E-243 | -0.077 | 32 | 7.2  | Q2 |
| IPI00165393; | ANP32E   | 20.5 | 2.04E-114 | -0.077 | 5  | 3.9  | Q2 |
| IPI00034049; | UPF1     | 41.5 | 2.88E-235 | -0.077 | 50 | 8.5  | Q2 |
| IPI00412224; | BRWD2    | 11.4 | 8.45E-178 | -0.076 | 11 | 22.8 | Q2 |
| IPI00827967; | PARF     | 4.9  | 1.81E-13  | -0.075 | 3  | 8.2  | Q2 |
| IPI00032342; | TRIP12   | 5.8  | 7.90E-76  | -0.075 | 11 | 7.6  | Q2 |
| IPI00031519; | DNMT1    | 9.3  | 1.68E-96  | -0.074 | 16 | 18.4 | Q2 |
| IPI00031411; | FAT1     | 6    | 3.76E-54  | -0.074 | 27 | 13.4 | Q2 |
| IPI00013068; | EIF3E    | 47.9 | 1.22E-199 | -0.074 | 11 | 14.1 | Q2 |
| IPI00003479; | MAPK1    | 40.6 | 3.08E-51  | -0.074 | 5  | 15.2 | Q2 |
| IPI00000728; | USP15    | 4.9  | 4.47E-07  | -0.073 | 6  | 9.2  | Q2 |
| IPI00008530; | RPLP0    | 50.2 | 9.13E-247 | -0.073 | 28 | 8.0  | Q2 |
| IPI00328715  | MTDH     | 9.3  | 9.97E-36  | -0.072 | 3  | 3.4  | Q2 |
| IPI00003768; | PES1     | 10.4 | 3.54E-24  | -0.071 | 4  | 7.8  | Q2 |
| IPI00215920  | ARF6     | 30.3 | 1.62E-75  | -0.070 | 6  | 23.6 | Q2 |
| IPI00027180  | ZMPSTE24 | 12.4 | 3.96E-63  | -0.070 | 2  | 10.1 | Q2 |
| IPI00301021; | SSR1     | 11.9 | 2.75E-41  | -0.070 | 3  | 10.3 | Q2 |
| IPI00328200; | QRICH1   | 5.2  | 7.39E-15  | -0.069 | 4  | 4.0  | Q2 |
| IPI00218187; | PPP1CC   | 7.1  | 1.25E-300 | -0.069 | 2  | 9.3  | Q2 |
| IPI00741970; | STRN4    | 3.9  | 8.52E-24  | -0.069 | 2  | 11.4 | Q2 |
| IPI00027230; | HSP90B1  | 59.7 | <1.0E-304 | -0.069 | 70 | 38.7 | Q2 |
| IPI00004459  | DIMT1L   | 23   | 4.00E-23  | -0.069 | 5  | 7.4  | Q2 |
| IPI00304527  | FAM83B   | 15.5 | 2.93E-65  | -0.067 | 14 | 8.2  | Q2 |
| IPI00018873; | NAMPT    | 32   | 8.01E-206 | -0.067 | 4  | 5.3  | Q2 |
| IPI00018627; | NAT13    | 66.9 | 2.88E-75  | -0.067 | 9  | 5.8  | Q2 |
| IPI00554761; | HMG1     | 30   | 1.61E-43  | -0.067 | 3  | 5.0  | Q2 |
| IPI00183626; | PTBP1    | 36.3 | <1.0E-304 | -0.067 | 17 | 94.2 | Q2 |
| IPI00470576  | LRRC57   | 15.1 | 2.05E-13  | -0.066 | 3  | 3.0  | Q2 |
| IPI00306380; | GNL3     | 7.3  | 5.72E-08  | -0.065 | 4  | 2.9  | Q2 |
| IPI00104050  | THRAP3   | 19.6 | 4.35E-66  | -0.065 | 22 | 7.5  | Q2 |
| IPI00014230; | C1QBP    | 26.2 | 3.62E-162 | -0.064 | 5  | 6.4  | Q2 |
| IPI00747764; | KPNA6    | 11.8 | 5.38E-32  | -0.064 | 3  | 8.1  | Q2 |
| IPI00550234; | ARPC5    | 43.7 | 7.00E-36  | -0.063 | 4  | 9.8  | Q2 |

|              |          |      |           |        |    |       |    |
|--------------|----------|------|-----------|--------|----|-------|----|
| IPI00783781; | NUP205   | 14.5 | 1.95E-94  | -0.062 | 27 | 10.3  | Q2 |
| IPI00890743; | PPP6C    | 25.1 | 2.49E-90  | -0.062 | 6  | 11.5  | Q2 |
| IPI00016249; | FXR1     | 11.6 | 1.42E-31  | -0.061 | 3  | 14.2  | Q2 |
| IPI00395337; | FIP1L1   | 7.4  | 2.07E-72  | -0.061 | 3  | 10.4  | Q2 |
| IPI00337667; | BICD2    | 11.7 | 4.02E-98  | -0.061 | 8  | 7.3   | Q2 |
| IPI00852741; | SEC31A   | 20.4 | 3.56E-77  | -0.060 | 26 | 11.7  | Q2 |
| IPI00304267; | NXN      | 17.5 | 2.35E-151 | -0.060 | 7  | 17.1  | Q2 |
| IPI00871975; | DHRS7B   | 8.9  | 4.41E-68  | -0.060 | 2  | 6.0   | Q2 |
| IPI00007935; | PDLIM5   | 16.3 | 3.19E-30  | -0.059 | 7  | 23.1  | Q2 |
| IPI00016405; | OCIAD1   | 19.6 | 5.66E-21  | -0.059 | 10 | 4.6   | Q2 |
| IPI00872754; | STK24    | 15.1 | 6.21E-140 | -0.059 | 2  | 0.4   | Q2 |
| IPI00420014; | SNRNP200 | 26.8 | <1.0E-304 | -0.059 | 60 | 12.0  | Q2 |
| IPI00290142; | CTPS     | 40.1 | 1.10E-213 | -0.059 | 14 | 5.6   | Q2 |
| IPI00642971; | EEF1D    | 26.1 | 1.69E-233 | -0.058 | 9  | 9.3   | Q2 |
| IPI00654777; | EIF3F    | 39.5 | 2.60E-130 | -0.058 | 5  | 10.3  | Q2 |
| IPI00008964; | RAB1B    | 25.4 | 3.50E-262 | -0.058 | 10 | 13.1  | Q2 |
| IPI00419844; | USP39    | 6.4  | 1.66E-25  | -0.058 | 3  | 11.1  | Q2 |
| IPI00183274; | SNX1     | 20.3 | 8.22E-49  | -0.058 | 6  | 16.5  | Q2 |
| IPI00168849; | TRIP10   | 6.3  | 1.30E-08  | -0.057 | 5  | 5.2   | Q2 |
| IPI00472171; | RPL7     | 59.5 | 1.16E-104 | -0.057 | 17 | 7.0   | Q2 |
| IPI00102425; | RPRD1A   | 16   | 2.80E-29  | -0.056 | 2  | 35.1  | Q2 |
| IPI00027096; | MRPL19   | 21.6 | 9.39E-21  | -0.056 | 7  | 10.2  | Q2 |
| IPI00827508; | RPL10A   | 53.4 | 7.23E-214 | -0.056 | 20 | 10.5  | Q2 |
| IPI00038378; | ENOPH1   | 17.6 | 8.09E-41  | -0.055 | 3  | 137.6 | Q2 |
| IPI00300371; | SF3B3    | 24.4 | <1.0E-304 | -0.055 | 41 | 6.3   | Q2 |
| IPI00852806; | EXOC6B   | 3.2  | 6.05E-19  | -0.055 | 2  | 1.5   | Q2 |
| IPI00219518; | ARL1     | 34.3 | 3.35E-29  | -0.055 | 3  | 3.0   | Q2 |
| IPI00028160; | HMBS     | 13   | 3.05E-150 | -0.054 | 2  | 17.5  | Q2 |
| IPI00029601; | CTTN     | 27.8 | 2.01E-212 | -0.054 | 13 | 7.5   | Q2 |
| IPI00005573; | NT5C     | 34.8 | 1.45E-15  | -0.054 | 4  | 16.4  | Q2 |
| IPI00021347; | UBE2L3   | 47.4 | 1.23E-173 | -0.054 | 8  | 5.3   | Q2 |
| IPI00291607; | ITPR3    | 4.2  | 1.49E-44  | -0.053 | 10 | 6.6   | Q2 |
| IPI00295585; | CGGBP1   | 19.8 | 1.37E-08  | -0.053 | 3  | 6.4   | Q2 |

|              |          |      |           |        |    |      |    |
|--------------|----------|------|-----------|--------|----|------|----|
| IPI00549736; | ASCC2    | 8.5  | 6.36E-13  | -0.053 | 4  | 12.3 | Q2 |
| IPI00000279; | ZC3H15   | 7.2  | 5.40E-50  | -0.052 | 2  | 19.6 | Q2 |
| IPI00159899; | ANKFY1   | 3.3  | 3.11E-32  | -0.052 | 4  | 1.9  | Q2 |
| IPI00382470; | HSP90AA1 | 32.8 | <1.0E-304 | -0.052 | 49 | 49.0 | Q2 |
| IPI00871780; | RBM12B   | 4.4  | 1.27E-17  | -0.052 | 4  | 8.6  | Q2 |
| IPI00016605; | C1orf123 | 15   | 6.09E-03  | -0.051 | 2  | 17.1 | Q2 |
| IPI00215999; | CDC2L1   | 7.4  | 1.00E-34  | -0.051 | 5  | 25.3 | Q2 |
| IPI00013214; | MCM3     | 31.8 | 1.33E-220 | -0.051 | 26 | 14.6 | Q2 |
| IPI00299573; | RPL7A    | 50   | <1.0E-304 | -0.051 | 22 | 6.5  | Q2 |
| IPI00301936; | ELAVL1   | 31.7 | 1.37E-111 | -0.050 | 5  | 2.3  | Q2 |
| IPI00794278; | CDC27    | 4.2  | 4.89E-30  | -0.050 | 3  | 9.2  | Q2 |
| IPI00376798; | RPL11    | 46.1 | 2.73E-58  | -0.050 | 9  | 8.1  | Q2 |
| IPI00376798; | RPL11    | 46.1 | 2.73E-58  | -0.050 | 9  | 8.1  | Q3 |
| IPI00654555; | NOP2     | 23   | 5.19E-209 | -0.050 | 13 | 7.4  | Q2 |
| IPI00005578  | EHD4     | 29.4 | 9.82E-159 | -0.049 | 5  | 24.4 | Q2 |
| IPI00872533; | CD2AP    | 8.5  | 1.73E-14  | -0.049 | 3  | 4.8  | Q2 |
| IPI00009943; | TPT1     | 52.7 | 9.23E-125 | -0.049 | 21 | 9.4  | Q2 |
| IPI00472939; | SPCS2    | 49.8 | 5.22E-188 | -0.049 | 11 | 9.6  | Q2 |
| IPI00215884; | SFRS1    | 51.2 | 1.90E-137 | -0.048 | 15 | 7.6  | Q2 |
| IPI00220031; | PXN      | 15   | 9.87E-108 | -0.048 | 4  | 5.3  | Q2 |
| IPI00106495  | NCAPG    | 8.2  | 1.19E-82  | -0.048 | 7  | 10.8 | Q2 |
| IPI00008380; | PPP2CA   | 48.2 | 3.42E-231 | -0.048 | 11 | 24.0 | Q2 |
| IPI00013930  | STX6     | 12.9 | 1.52E-02  | -0.048 | 2  | 12.0 | Q2 |
| IPI00004273; | RBM25    | 2.3  | 1.05E-03  | -0.047 | 3  | 14.3 | Q2 |
| IPI00003588; | EEF1E1   | 44.3 | 1.05E-36  | -0.047 | 8  | 14.0 | Q2 |
| IPI00023234  | UBA2     | 11.1 | 4.53E-23  | -0.047 | 3  | 8.7  | Q2 |
| IPI00011285; | CAPN1    | 33.9 | 5.06E-140 | -0.047 | 11 | 10.6 | Q2 |
| IPI00031517  | MCM6     | 24   | 6.82E-91  | -0.046 | 20 | 8.1  | Q2 |
| IPI00003968; | NDUFA9   | 16.2 | 4.55E-31  | -0.046 | 2  | 2.2  | Q2 |
| IPI00018349; | MCM4     | 18.5 | 1.59E-100 | -0.046 | 12 | 9.4  | Q2 |
| IPI00744702; | FAM125A  | 11.7 | 9.63E-48  | -0.045 | 2  | 1.1  | Q2 |
| IPI00514619; | C2orf4   | 35.7 | 1.25E-104 | -0.045 | 7  | 6.8  | Q2 |
| IPI00217049; | OAS2     | 15.4 | 1.24E-41  | -0.044 | 7  | 8.2  | Q2 |

|              |          |      |           |        |    |      |    |
|--------------|----------|------|-----------|--------|----|------|----|
| IPI00012340; | SFRS9    | 36.7 | 4.72E-37  | -0.044 | 10 | 9.7  | Q2 |
| IPI00011253; | RPS3     | 80.7 | 3.82E-225 | -0.044 | 24 | 6.5  | Q2 |
| IPI00414482; | GTF3C1   | 3.1  | 2.12E-23  | -0.044 | 4  | 21.8 | Q2 |
| IPI00550032; | RP11     | 53.4 | 2.54E-80  | -0.043 | 18 | 24.8 | Q2 |
| IPI00011461; | STRN3    | 3.3  | 5.16E-31  | -0.043 | 2  | 3.0  | Q2 |
| IPI00216046; | SMARCA1  | 2    | 8.05E-62  | -0.042 | 2  | 11.5 | Q2 |
| IPI00216026; | VDAC2    | 52.4 | 2.32E-215 | -0.042 | 20 | 6.0  | Q2 |
| IPI00011698; | SAP18    | 25.6 | 4.41E-05  | -0.041 | 2  | 1.2  | Q2 |
| IPI00654552; | PLCH2    | 1.6  | 1.46E-15  | -0.041 | 2  | 0.1  | Q2 |
| IPI00000811; | PSMB6    | 23.4 | 1.37E-21  | -0.041 | 3  | 2.5  | Q2 |
| IPI00305212; | COMMD9   | 17.7 | 4.03E-46  | -0.041 | 4  | 7.5  | Q2 |
| IPI00012268; | PSMD2    | 44.4 | <1.0E-304 | -0.041 | 44 | 10.3 | Q2 |
| IPI00023406  | HCCS     | 23.5 | 4.02E-32  | -0.040 | 3  | 6.5  | Q2 |
| IPI00107104; | CXorf26  | 41.2 | 3.27E-119 | -0.040 | 6  | 6.3  | Q2 |
| IPI00003918; | RPL4     | 48.9 | <1.0E-304 | -0.040 | 25 | 19.0 | Q2 |
| IPI00221325; | RANBP2   | 11.1 | 3.39E-238 | -0.040 | 29 | 16.1 | Q2 |
| IPI00295098; | SRPRB    | 52.8 | 8.28E-208 | -0.040 | 8  | 14.5 | Q2 |
| IPI00014311; | CUL2     | 5.4  | 2.72E-06  | -0.037 | 5  | 2.7  | Q2 |
| IPI00031526  | C19orf43 | 19.9 | 2.18E-09  | -0.036 | 3  | 15.8 | Q2 |
| IPI00304612; | RPL13A   | 49.3 | 5.33E-72  | -0.036 | 19 | 8.5  | Q2 |
| IPI00514856; | UBAP2L   | 21.5 | 1.22E-196 | -0.036 | 16 | 17.4 | Q2 |
| IPI00003377; | SFRS7    | 31.9 | 9.61E-56  | -0.036 | 9  | 12.0 | Q2 |
| IPI00098902; | OGDH     | 25.1 | 8.02E-210 | -0.036 | 23 | 13.5 | Q2 |
| IPI00027009; | PACSIN2  | 10.7 | 3.46E-20  | -0.036 | 5  | 7.3  | Q2 |
| IPI00107113; | UTP14A   | 7.1  | 1.49E-49  | -0.035 | 4  | 3.0  | Q2 |
| IPI00550021; | RPL3     | 44.7 | 1.01E-171 | -0.035 | 18 | 7.3  | Q2 |
| IPI00217466  | HIST1H1D | 16.3 | 9.44E-78  | -0.035 | 3  | 5.0  | Q2 |
| IPI00021266; | RPL23A   | 46.8 | 6.22E-59  | -0.035 | 14 | 8.9  | Q2 |
| IPI00011919  | FADD     | 9.6  | 1.00E-02  | -0.034 | 2  | 4.0  | Q2 |
| IPI00789041; | PNN      | 18.1 | 5.13E-83  | -0.034 | 13 | 17.9 | Q2 |
| IPI00298991; | KIAA1033 | 7.2  | 9.42E-45  | -0.034 | 8  | 7.7  | Q2 |
| IPI00298058; | SUPT5H   | 11.8 | 5.72E-62  | -0.033 | 13 | 7.9  | Q2 |
| IPI00719725; | SAPS3    | 9.1  | 8.35E-27  | -0.033 | 10 | 9.0  | Q2 |

|              |          |      |           |        |     |      |    |
|--------------|----------|------|-----------|--------|-----|------|----|
| IPI00041325; | NHP2     | 37.9 | 1.32E-92  | -0.032 | 4   | 5.9  | Q2 |
| IPI00470502; | PPA2     | 30.1 | 6.92E-89  | -0.032 | 4   | 17.6 | Q2 |
| IPI00419880; | RPS3A    | 63.6 | 6.48E-200 | -0.031 | 29  | 12.6 | Q2 |
| IPI00165092  | YARS2    | 8.6  | 6.44E-28  | -0.031 | 3   | 50.2 | Q2 |
| IPI00759776; | ACTN1    | 51.1 | <1.0E-304 | -0.031 | 73  | 5.2  | Q2 |
| IPI00604523; | MYL12B   | 49.7 | 5.34E-126 | -0.031 | 20  | 5.3  | Q2 |
| IPI00021338; | DLAT     | 15   | 3.14E-54  | -0.031 | 7   | 7.1  | Q2 |
| IPI00026262; | RASA1    | 11.2 | 3.55E-90  | -0.030 | 12  | 19.3 | Q2 |
| IPI00000105; | MVP      | 47.7 | <1.0E-304 | -0.030 | 34  | 5.9  | Q2 |
| IPI00216237; | RPL36    | 37.1 | 4.63E-24  | -0.029 | 5   | 15.8 | Q2 |
| IPI00306280; | DENR     | 32.2 | 1.89E-135 | -0.029 | 6   | 9.3  | Q2 |
| IPI00215719; | RPL18    | 45.7 | 2.43E-86  | -0.029 | 17  | 65.3 | Q2 |
| IPI00908725; | ZC3H18   | 2.7  | 3.22E-57  | -0.028 | 2   | 6.2  | Q2 |
| IPI00171611; | HIST2H3A | 57.4 | 2.41E-31  | -0.028 | 18  | 27.2 | Q2 |
| IPI00399254; | OTUD4    | 1.8  | 4.47E-03  | -0.028 | 2   | 0.1  | Q2 |
| IPI00019502; | MYH9     | 65.7 | <1.0E-304 | -0.028 | 380 | 16.7 | Q2 |
| IPI00017763; | NAP1L4   | 33.7 | 1.11E-255 | -0.028 | 7   | 7.2  | Q2 |
| IPI00005715; | UBE4B    | 3.7  | 8.13E-15  | -0.027 | 3   | 3.6  | Q2 |
| IPI00025039; | FBL      | 38.9 | 1.84E-109 | -0.027 | 6   | 5.4  | Q2 |
| IPI00025491; | EIF4A1   | 60.6 | <1.0E-304 | -0.027 | 19  | 7.4  | Q2 |
| IPI00005978; | SFRS2    | 33.5 | 1.26E-128 | -0.027 | 11  | 6.8  | Q2 |
| IPI00871157; | SRPK2    | 2.9  | 9.13E-07  | -0.027 | 2   | 0.7  | Q2 |
| IPI00013184; | ARD1A    | 24.7 | 3.58E-28  | -0.026 | 6   | 1.7  | Q2 |
| IPI00744692; | TALDO1   | 40.7 | 7.83E-105 | -0.026 | 5   | 8.3  | Q2 |
| IPI00399089; | MESDC2   | 26.5 | 2.30E-19  | -0.025 | 3   | 7.0  | Q2 |
| IPI00552920; | EXOSC8   | 18.8 | 1.34E-55  | -0.025 | 2   | 0.1  | Q2 |
| IPI00303722; | FAM136A  | 23.2 | 3.46E-09  | -0.025 | 4   | 3.2  | Q2 |
| IPI00013485; | RPS2     | 50.2 | 3.85E-186 | -0.025 | 17  | 6.3  | Q2 |
| IPI00002857; | MAPK14   | 11.7 | 6.90E-18  | -0.025 | 3   | 3.8  | Q2 |
| IPI00900293  | FLNB     | 62.1 | <1.0E-304 | -0.025 | 299 | 28.9 | Q2 |
| IPI00411937; | NOP56    | 32.7 | <1.0E-304 | -0.024 | 14  | 8.2  | Q2 |
| IPI00008438; | RPS10    | 47.9 | 1.57E-102 | -0.024 | 16  | 7.9  | Q2 |
| IPI00031583; | USO1     | 19.6 | 3.10E-157 | -0.024 | 16  | 7.2  | Q2 |

|              |         |      |           |        |    |      |    |
|--------------|---------|------|-----------|--------|----|------|----|
| IPI00152642; | LRRC8C  | 3.7  | 4.98E-11  | -0.024 | 3  | 13.9 | Q2 |
| IPI00419249; | PSMA3   | 41.6 | 7.05E-90  | -0.024 | 7  | 8.4  | Q2 |
| IPI00293126; | TBCB    | 47.5 | 2.64E-103 | -0.023 | 6  | 5.2  | Q2 |
| IPI00293845; | RIF1    | 2.1  | 5.18E-70  | -0.023 | 4  | 4.8  | Q2 |
| IPI00465361; | RPL13   | 46   | 1.57E-41  | -0.023 | 14 | 4.9  | Q2 |
| IPI00030767; | IMUP    | 34.9 | 2.01E-16  | -0.023 | 2  | 1.6  | Q2 |
| IPI00235412; | DNM1L   | 39.3 | <1.0E-304 | -0.023 | 22 | 7.3  | Q2 |
| IPI00295889; | SRP19   | 37.5 | 1.45E-70  | -0.023 | 5  | 1.8  | Q2 |
| IPI00792422; | FAM21A  | 4.5  | 2.41E-181 | -0.022 | 3  | 3.4  | Q2 |
| IPI00872430; | RPS8    | 55.8 | 9.10E-173 | -0.022 | 13 | 20.2 | Q2 |
| IPI00024662  | CBX5    | 31.9 | 2.31E-98  | -0.022 | 3  | 5.5  | Q2 |
| IPI00218606; | RPS23   | 29.4 | 5.55E-22  | -0.022 | 7  | 5.2  | Q2 |
| IPI00074587; | FUSIP1  | 21.8 | 1.76E-63  | -0.022 | 4  | 11.4 | Q2 |
| IPI00025366; | CS      | 23.2 | 7.88E-81  | -0.022 | 6  | 94.9 | Q2 |
| IPI00554737; | PPP2R1A | 47.9 | <1.0E-304 | -0.021 | 19 | 13.8 | Q2 |
| IPI00555744; | RPL14   | 37.7 | 2.22E-147 | -0.021 | 12 | 29.0 | Q2 |
| IPI00012750; | RPS25   | 35.2 | 1.89E-26  | -0.021 | 7  | 4.8  | Q2 |
| IPI00017450; | GTF2F1  | 5.2  | 2.25E-58  | -0.021 | 2  | 3.1  | Q2 |
| IPI00477313; | HNRNPC  | 45.8 | 8.19E-140 | -0.020 | 19 | 9.0  | Q2 |
| IPI00020672; | DPP3    | 23.6 | 5.22E-137 | -0.020 | 5  | 43.6 | Q2 |
| IPI00914529; | RPL28   | 32.5 | 2.68E-27  | -0.020 | 5  | 2.7  | Q2 |
| IPI00027834; | HNRNPL  | 42.8 | 1.64E-254 | -0.020 | 11 | 20.6 | Q2 |
| IPI00291006; | MDH2    | 65.7 | <1.0E-304 | -0.020 | 27 | 32.1 | Q2 |
| IPI00015952; | EIF4G2  | 23.7 | 2.31E-141 | -0.020 | 19 | 10.7 | Q2 |
| IPI00102069; | EIF3M   | 38   | 3.56E-224 | -0.020 | 8  | 12.2 | Q2 |
| IPI00023161; | MRPL46  | 24   | 8.73E-57  | -0.020 | 5  | 13.0 | Q2 |
| IPI00095891; | GNAS    | 6    | 3.98E-30  | -0.019 | 3  | 4.5  | Q2 |
| IPI00288947; | GNAQ    | 14.2 | 2.35E-26  | -0.019 | 2  | 14.1 | Q2 |
| IPI00012497; | ADRBK1  | 2.3  | 8.80E-03  | -0.019 | 3  | 5.6  | Q2 |
| IPI00003833  | MTCH2   | 48.2 | 5.74E-185 | -0.018 | 12 | 6.9  | Q2 |
| IPI00163644; | OSBPL8  | 9    | 3.05E-56  | -0.018 | 6  | 3.7  | Q2 |
| IPI00217030; | RPS4X   | 69.6 | 9.85E-198 | -0.017 | 19 | 5.0  | Q2 |
| IPI00017334; | PHB     | 60.3 | 4.16E-229 | -0.017 | 20 | 35.0 | Q2 |



|              |          |      |           |        |    |       |    |
|--------------|----------|------|-----------|--------|----|-------|----|
| IPI00006099; | BMS1     | 6.6  | 4.55E-71  | -0.017 | 7  | 7.3   | Q2 |
| IPI00411559; | SMC4     | 21.8 | 7.67E-138 | -0.017 | 30 | 12.0  | Q2 |
| IPI00745406; | SPAG9    | 6.1  | 5.78E-31  | -0.017 | 6  | 10.0  | Q2 |
| IPI00247583; | RPL21    | 42.5 | 1.45E-89  | -0.016 | 17 | 44.4  | Q2 |
| IPI00872985; | GAR1     | 20.2 | 2.35E-28  | -0.015 | 3  | 15.1  | Q2 |
| IPI00018398  | PSMC3    | 38.7 | 8.60E-159 | -0.015 | 4  | 21.0  | Q2 |
| IPI00160421  | MRPL18   | 22.2 | 1.09E-29  | -0.015 | 3  | 7.1   | Q2 |
| IPI00005969; | CAPZA1   | 66.4 | 3.69E-200 | -0.015 | 6  | 18.1  | Q2 |
| IPI00060627  | CCDC124  | 35.9 | 2.54E-105 | -0.015 | 3  | 3.3   | Q2 |
| IPI00012011; | CFL1     | 89.2 | <1.0E-304 | -0.015 | 37 | 13.8  | Q2 |
| IPI00004363  | STK39    | 4.8  | 1.29E-17  | -0.014 | 2  | 39.3  | Q2 |
| IPI00006440  | MRPS7    | 5    | 7.53E-05  | -0.014 | 2  | 4.8   | Q2 |
| IPI00003217; | PSMB7    | 26   | 1.37E-25  | -0.014 | 7  | 5.5   | Q2 |
| IPI00420108; | DLST     | 19.6 | 1.87E-68  | -0.014 | 6  | 12.6  | Q2 |
| IPI00013219; | ILK      | 19.5 | 1.13E-22  | -0.014 | 2  | 11.7  | Q2 |
| IPI00394668; | ADAR     | 6.5  | 2.09E-88  | -0.013 | 11 | 19.9  | Q2 |
| IPI00641950; | GNB2L1   | 68.2 | 8.87E-288 | -0.013 | 31 | 13.7  | Q2 |
| IPI00024661; | SEC24C   | 20.1 | 2.06E-160 | -0.011 | 18 | 6.0   | Q2 |
| IPI00152011; | ARHGAP29 | 14.8 | 1.05E-113 | -0.011 | 16 | 16.1  | Q2 |
| IPI00217465; | HIST1H1C | 40.8 | 5.30E-79  | -0.011 | 18 | 69.3  | Q2 |
| IPI00299524; | NCAPD2   | 20.5 | 6.68E-168 | -0.010 | 27 | 10.2  | Q2 |
| IPI00304082; | ISOC1    | 29.2 | 1.82E-111 | -0.010 | 7  | 7.3   | Q2 |
| IPI00926977; | PSMC6    | 45.7 | 1.12E-200 | -0.009 | 5  | 5.2   | Q2 |
| IPI00011603; | PSMD3    | 32.8 | 3.16E-219 | -0.009 | 11 | 6.2   | Q2 |
| IPI00386189; | NARG1    | 32.4 | 3.90E-120 | -0.009 | 25 | 8.7   | Q2 |
| IPI00029623; | PSMA6    | 45.9 | 2.29E-93  | -0.008 | 10 | 7.9   | Q2 |
| IPI00029079; | GMPS     | 28.1 | 3.23E-259 | -0.008 | 14 | 6.6   | Q2 |
| IPI00871891; | COMMD8   | 19.1 | 2.67E-21  | -0.008 | 2  | 0.6   | Q2 |
| IPI00927682; | RAB3GAP1 | 21   | 9.62E-141 | -0.007 | 19 | 9.8   | Q2 |
| IPI00554705; | DCTD     | 51.9 | 1.48E-90  | -0.007 | 5  | 111.5 | Q2 |
| IPI00009301; | COPS7B   | 16.3 | 2.98E-73  | -0.007 | 4  | 6.3   | Q2 |
| IPI00030654; | CPSF6    | 13.9 | 1.64E-87  | -0.006 | 3  | 2.4   | Q2 |
| IPI00025329; | RPL19    | 33.7 | 1.01E-117 | -0.006 | 15 | 9.8   | Q2 |

|             |          |      |           |        |     |      |    |
|-------------|----------|------|-----------|--------|-----|------|----|
| IPI00152998 | LRRC40   | 16.6 | 1.90E-35  | -0.006 | 7   | 14.1 | Q2 |
| IPI00028357 | XPO4     | 4.7  | 1.63E-27  | -0.005 | 5   | 8.0  | Q2 |
| IPI00872664 | USP14    | 26.3 | 4.57E-94  | -0.005 | 6   | 8.4  | Q2 |
| IPI00221300 | EIF2B1   | 29.5 | 4.79E-69  | -0.005 | 8   | 9.0  | Q2 |
| IPI00298949 | GAK      | 6.1  | 3.11E-58  | -0.004 | 7   | 6.0  | Q2 |
| IPI00219160 | RPL34    | 37.6 | 1.66E-14  | -0.004 | 8   | 7.0  | Q2 |
| IPI00029997 | PGLS     | 59.7 | 8.72E-195 | -0.004 | 5   | 22.5 | Q2 |
| IPI00031691 | RPL9     | 56.8 | 4.87E-157 | -0.004 | 13  | 5.3  | Q2 |
| IPI00644386 | FUBP1    | 25.6 | 3.42E-146 | -0.004 | 11  | 12.8 | Q2 |
| IPI00443909 | CNPY2    | 31.3 | 7.66E-67  | -0.004 | 3   | 23.1 | Q2 |
| IPI00903226 | HK1      | 40.1 | <1.0E-304 | -0.003 | 45  | 14.3 | Q2 |
| IPI00152898 | AP1S1    | 36.7 | 1.13E-70  | -0.002 | 4   | 1.6  | Q2 |
| IPI00028955 | BOP1     | 11.1 | 8.70E-35  | -0.002 | 6   | 5.8  | Q2 |
| IPI00036742 | KIAA1429 | 2.5  | 1.55E-50  | -0.002 | 3   | 5.2  | Q2 |
| IPI00028091 | ACTR3    | 56   | 9.02E-206 | -0.002 | 13  | 11.7 | Q2 |
| IPI00021812 | AHNAK    | 71.8 | <1.0E-304 | -0.002 | 814 | 13.9 | Q2 |
| IPI00031960 | POLR1A   | 2.8  | 2.94E-05  | -0.001 | 4   | 34.4 | Q2 |
| IPI00216965 | GOSR2    | 13.1 | 4.53E-09  | 0.000  | 3   | 10.8 | Q2 |
| IPI00794956 | SCFD1    | 16.5 | 3.89E-91  | 0.000  | 5   | 3.9  | Q2 |
| IPI00065671 | UCK2     | 18.8 | 1.65E-42  | 0.000  | 5   | 7.0  | Q2 |
| IPI00438229 | TRIM28   | 37   | <1.0E-304 | 0.000  | 26  | 10.3 | Q2 |
| IPI00026202 | RPL18A   | 51.1 | 2.58E-96  | 0.000  | 18  | 6.4  | Q2 |
| IPI00006379 | NOP58    | 27.2 | 3.61E-209 | 0.000  | 6   | 64.4 | Q2 |
| IPI00005198 | ILF2     | 37.2 | 1.56E-207 | 0.000  | 8   | 8.1  | Q2 |
| IPI00012462 | EIF2A    | 14   | 4.11E-33  | 0.000  | 6   | 99.1 | Q2 |
| IPI00745613 | EXOSC4   | 22.9 | 9.28E-37  | 0.000  | 5   | 8.4  | Q2 |
| IPI00333541 | FLNA     | 58.3 | <1.0E-304 | 0.001  | 203 | 13.5 | Q2 |
| IPI00020965 | UBE2H    | 26.8 | 1.10E-27  | 0.002  | 3   | 5.2  | Q2 |
| IPI00329512 | SNRPB    | 20.8 | 4.38E-91  | 0.002  | 12  | 13.9 | Q2 |
| IPI00456359 | ATXN2L   | 15.7 | 1.05E-78  | 0.002  | 14  | 16.0 | Q2 |
| IPI00871680 | ARFGAP2  | 4    | 9.47E-05  | 0.002  | 2   | 8.4  | Q2 |
| IPI00414168 | MARCH5   | 21.6 | 2.71E-58  | 0.002  | 5   | 9.0  | Q2 |
| IPI00215914 | ARF1     | 69.1 | 5.76E-180 | 0.002  | 18  | 8.4  | Q2 |

|              |         |      |           |       |     |      |    |
|--------------|---------|------|-----------|-------|-----|------|----|
| IPI00413108; | RPSA    | 61.3 | <1.0E-304 | 0.003 | 15  | 13.1 | Q2 |
| IPI00384280; | PCYOX1  | 15.8 | 3.66E-68  | 0.004 | 2   | 1.1  | Q2 |
| IPI00024933; | RPL12   | 71.5 | 8.86E-262 | 0.004 | 13  | 6.8  | Q2 |
| IPI00014898; | PLEC1   | 68.9 | <1.0E-304 | 0.004 | 948 | 17.3 | Q2 |
| IPI00002214; | KPNA2   | 28.2 | 3.23E-195 | 0.004 | 5   | 28.2 | Q2 |
| IPI00179330; | RPS27A  | 64.7 | 4.32E-127 | 0.004 | 55  | 11.0 | Q2 |
| IPI00294536; | STRAP   | 58.7 | 1.27E-193 | 0.005 | 10  | 5.7  | Q2 |
| IPI00872177; | PPP1CB  | 14.4 | 9.77E-282 | 0.005 | 3   | 7.6  | Q2 |
| IPI00027252; | PHB2    | 68.2 | 3.96E-258 | 0.005 | 21  | 4.5  | Q2 |
| IPI00007175; | NIP7    | 34.4 | 1.05E-44  | 0.006 | 4   | 4.3  | Q2 |
| IPI00413324; | RPL17   | 55.4 | 4.13E-90  | 0.006 | 16  | 9.7  | Q2 |
| IPI00293260; | DNAJC10 | 10.2 | 1.39E-95  | 0.006 | 6   | 8.6  | Q2 |
| IPI00237884; | AKAP12  | 6.2  | 1.24E-100 | 0.006 | 9   | 3.7  | Q2 |
| IPI00306960; | NARS    | 32.7 | 8.67E-177 | 0.006 | 8   | 12.7 | Q2 |
| IPI00783874; | HDHD2   | 16.2 | 6.77E-41  | 0.006 | 3   | 10.1 | Q2 |
| IPI00291922  | PSMA5   | 52.3 | 7.20E-192 | 0.007 | 15  | 3.9  | Q2 |
| IPI00029267  | SNRPB2  | 31.6 | 2.15E-17  | 0.007 | 7   | 9.6  | Q2 |
| IPI00013415; | RPS7    | 49.5 | 1.71E-63  | 0.007 | 28  | 8.6  | Q2 |
| IPI00555902; | OCIAD2  | 63   | 2.06E-53  | 0.008 | 10  | 4.8  | Q2 |
| IPI00025091  | RPS11   | 62   | 6.54E-75  | 0.008 | 19  | 11.1 | Q2 |
| IPI00719752; | EIF3B   | 37   | 2.35E-296 | 0.008 | 31  | 7.1  | Q2 |
| IPI00299571; | PDIA6   | 44.5 | <1.0E-304 | 0.009 | 15  | 7.8  | Q2 |
| IPI00430812; | CNBP    | 26.6 | 3.58E-48  | 0.009 | 2   | 3.4  | Q2 |
| IPI00023919; | PSMC5   | 52.2 | 1.07E-228 | 0.009 | 10  | 10.9 | Q2 |
| IPI00021840; | RPS6    | 32.5 | 9.34E-108 | 0.009 | 16  | 62.3 | Q2 |
| IPI00878985; | INF2    | 6.4  | 5.25E-35  | 0.009 | 7   | 5.3  | Q2 |
| IPI00030275; | TRAP1   | 25.3 | 5.49E-195 | 0.010 | 8   | 6.4  | Q2 |
| IPI00909642; | FLNA    | 0.6  | <1.0E-304 | 0.010 | 2   | 12.5 | Q2 |
| IPI00166010; | CNOT1   | 7.5  | 1.00E-70  | 0.010 | 17  | 20.8 | Q2 |
| IPI00000821  | MRPL16  | 4    | 1.93E-06  | 0.010 | 2   | 1.6  | Q2 |
| IPI00032830; | REXO2   | 27.8 | 4.80E-25  | 0.011 | 7   | 2.1  | Q2 |
| IPI00456758  | RPL27A  | 44.6 | 7.62E-46  | 0.011 | 9   | 16.5 | Q2 |
| IPI00783656; | MRPL38  | 4.7  | 3.94E-04  | 0.012 | 4   | 6.4  | Q2 |

|              |          |      |           |       |     |      |    |
|--------------|----------|------|-----------|-------|-----|------|----|
| IPI00739940; | FRYL     | 4.3  | 4.46E-111 | 0.012 | 11  | 29.5 | Q2 |
| IPI00641990; | LAS1L    | 6.7  | 2.98E-68  | 0.012 | 4   | 3.0  | Q2 |
| IPI00299149; | SUMO2    | 29.5 | 5.09E-26  | 0.012 | 5   | 31.5 | Q2 |
| IPI00216746; | HNRNPK   | 48.9 | <1.0E-304 | 0.012 | 20  | 32.5 | Q2 |
| IPI00871870; | ARPC3    | 46.1 | 5.45E-81  | 0.013 | 16  | 8.3  | Q2 |
| IPI00152510; | DDX54    | 6.7  | 2.93E-07  | 0.013 | 5   | 12.0 | Q2 |
| IPI00921422; | CKAP5    | 18.6 | 9.10E-232 | 0.013 | 35  | 22.6 | Q2 |
| IPI00000877; | HYOU1    | 34.8 | <1.0E-304 | 0.014 | 37  | 9.5  | Q2 |
| IPI00719680; | AP3D1    | 17.9 | 2.19E-117 | 0.014 | 21  | 12.8 | Q2 |
| IPI00219155; | RPL27    | 55.9 | 9.71E-40  | 0.014 | 12  | 10.8 | Q2 |
| IPI00107357; | CLPTM1   | 1.5  | 4.76E-04  | 0.015 | 2   | 5.9  | Q2 |
| IPI00001676; | NPLOC4   | 10.7 | 1.84E-92  | 0.015 | 5   | 4.4  | Q2 |
| IPI00234252; | SMARCC1  | 13.3 | 4.67E-58  | 0.015 | 13  | 13.8 | Q2 |
| IPI00793155; | RAB34    | 22.2 | 8.25E-24  | 0.015 | 5   | 5.1  | Q2 |
| IPI00027808; | POLR2B   | 16.4 | 5.25E-107 | 0.015 | 18  | 13.1 | Q2 |
| IPI00012772; | RPL8     | 28.4 | 3.51E-43  | 0.016 | 7   | 15.7 | Q2 |
| IPI00922181; | MCM2     | 22.6 | 9.14E-137 | 0.016 | 15  | 7.0  | Q2 |
| IPI00738765; | KIAA1949 | 8    | 3.04E-54  | 0.016 | 6   | 17.0 | Q2 |
| IPI00307200; | SWAP70   | 9.7  | 1.04E-07  | 0.017 | 4   | 13.0 | Q2 |
| IPI00012345; | SFRS6    | 11   | 2.14E-08  | 0.017 | 5   | 18.7 | Q2 |
| IPI00028006; | PSMB2    | 35.3 | 3.60E-82  | 0.017 | 9   | 12.2 | Q2 |
| IPI00005107; | NPC1     | 6.1  | 4.60E-55  | 0.017 | 8   | 15.2 | Q2 |
| IPI00815893; | CHD2     | 2.5  | 1.25E-18  | 0.018 | 5   | 9.3  | Q2 |
| IPI00220642; | YWHAG    | 51   | 9.32E-174 | 0.019 | 13  | 11.9 | Q2 |
| IPI00395694; | TNPO3    | 6.8  | 6.63E-123 | 0.019 | 6   | 3.9  | Q2 |
| IPI00002460; | ANXA7    | 21.3 | 2.33E-81  | 0.019 | 3   | 53.3 | Q2 |
| IPI00293655; | DDX1     | 28.1 | 3.67E-150 | 0.019 | 17  | 7.0  | Q2 |
| IPI00655650; | RPS26    | 37.4 | 2.41E-47  | 0.019 | 3   | 3.1  | Q2 |
| IPI00186290; | EEF2     | 64.3 | <1.0E-304 | 0.019 | 119 | 26.8 | Q2 |
| IPI00514914; | DIAPH2   | 1.9  | 1.06E-02  | 0.020 | 2   | 7.0  | Q2 |
| IPI00005202; | PGRMC2   | 17   | 3.77E-89  | 0.020 | 4   | 11.3 | Q2 |
| IPI00164005; | COG7     | 4.7  | 5.62E-06  | 0.020 | 3   | 12.6 | Q2 |
| IPI00008524; | PABPC1   | 37.3 | <1.0E-304 | 0.020 | 13  | 12.1 | Q2 |

|              |         |      |           |       |    |      |    |
|--------------|---------|------|-----------|-------|----|------|----|
| IPI00646839; | EIF3CL  | 26.1 | 1.46E-118 | 0.020 | 26 | 12.7 | Q2 |
| IPI00022403; | MRPL13  | 38.8 | 1.55E-12  | 0.020 | 4  | 12.4 | Q2 |
| IPI00878213; | AHCTF1  | 2    | 1.12E-29  | 0.020 | 4  | 37.4 | Q2 |
| IPI00552569; | ERCC6L  | 5.7  | 5.20E-62  | 0.020 | 7  | 9.1  | Q2 |
| IPI00162330; | MRPL37  | 11.8 | 5.60E-28  | 0.021 | 4  | 12.8 | Q2 |
| IPI00472442; | PSMA1   | 47.6 | 1.28E-105 | 0.021 | 14 | 28.1 | Q2 |
| IPI00009253; | NAPA    | 43.1 | 8.73E-137 | 0.022 | 8  | 16.4 | Q2 |
| IPI00024466; | UGCGL1  | 20.6 | 1.07E-260 | 0.022 | 33 | 10.3 | Q2 |
| IPI00022020  | INPP4B  | 3.5  | 2.41E-26  | 0.022 | 2  | 9.8  | Q2 |
| IPI00017592  | LETM1   | 16.1 | 4.40E-88  | 0.022 | 5  | 7.9  | Q2 |
| IPI00027270; | RPL26   | 40   | 5.90E-19  | 0.022 | 12 | 11.9 | Q2 |
| IPI00009471  | WDR3    | 9.3  | 3.90E-55  | 0.023 | 8  | 5.8  | Q2 |
| IPI00295457; | MPRIP   | 14.2 | 2.42E-85  | 0.023 | 12 | 12.9 | Q2 |
| IPI00221093; | RPS17   | 63   | 1.44E-204 | 0.023 | 16 | 4.2  | Q2 |
| IPI00927658; | RPL32   | 47.7 | 2.94E-74  | 0.023 | 11 | 14.3 | Q2 |
| IPI00013296; | RPS18   | 66.4 | 9.12E-70  | 0.024 | 21 | 6.9  | Q2 |
| IPI00009236; | CAV1    | 64.6 | 1.17E-143 | 0.024 | 20 | 34.4 | Q2 |
| IPI00020418  | RRAS    | 20.6 | 1.62E-108 | 0.025 | 3  | 11.5 | Q2 |
| IPI00060181; | EFHD2   | 49.6 | 7.44E-138 | 0.025 | 13 | 5.6  | Q2 |
| IPI00031651  | C7orf50 | 22.2 | 9.63E-75  | 0.025 | 2  | 3.1  | Q2 |
| IPI00796934; | RPL29   | 14.5 | 7.92E-23  | 0.025 | 4  | 2.4  | Q2 |
| IPI00292771; | NUMA1   | 14.1 | <1.0E-304 | 0.025 | 27 | 15.6 | Q2 |
| IPI00855856; | API5    | 18.3 | 1.35E-119 | 0.025 | 4  | 9.4  | Q2 |
| IPI00215965; | HNRNPA1 | 54.3 | <1.0E-304 | 0.026 | 30 | 14.6 | Q2 |
| IPI00302740; | RPS4Y1  | 21.3 | 2.74E-86  | 0.026 | 7  | 10.5 | Q2 |
| IPI00000816; | YWHAE   | 75.7 | <1.0E-304 | 0.026 | 41 | 63.6 | Q2 |
| IPI00215780; | RPS19   | 69   | 3.98E-54  | 0.026 | 20 | 12.2 | Q2 |
| IPI00011284; | COMT    | 28.4 | 2.13E-162 | 0.027 | 12 | 16.4 | Q2 |
| IPI00221088; | RPS9    | 59.8 | 1.01E-82  | 0.027 | 24 | 17.3 | Q2 |
| IPI00027463  | S100A6  | 74.4 | 3.30E-15  | 0.027 | 3  | 9.6  | Q2 |
| IPI00059292; | MAGOHB  | 35.8 | 3.36E-26  | 0.027 | 4  | 11.2 | Q2 |
| IPI00013195; | MRPL49  | 38.6 | 5.24E-57  | 0.028 | 5  | 5.0  | Q2 |
| IPI00029697; | EXOSC9  | 8.6  | 1.78E-52  | 0.028 | 2  | 3.2  | Q2 |

|              |           |      |           |       |     |      |    |
|--------------|-----------|------|-----------|-------|-----|------|----|
| IPI00783835; | RNF160    | 4    | 5.38E-51  | 0.028 | 7   | 19.4 | Q2 |
| IPI00909484; | CDC42     | 28.8 | 2.14E-58  | 0.028 | 5   | 4.1  | Q2 |
| IPI00646917; | NUDT21    | 34.4 | 6.91E-156 | 0.028 | 13  | 9.0  | Q2 |
| IPI00005161; | ARPC2     | 47   | 7.02E-99  | 0.028 | 19  | 5.8  | Q2 |
| IPI00001661; | RCC1      | 21.7 | 2.71E-100 | 0.029 | 3   | 3.8  | Q2 |
| IPI00450472; | UBE2I     | 33.7 | 6.77E-126 | 0.029 | 11  | 5.1  | Q2 |
| IPI00299608; | PSMD1     | 26.3 | 5.52E-228 | 0.029 | 21  | 4.7  | Q2 |
| IPI00172591  | MRPL17    | 34.3 | 1.11E-10  | 0.030 | 6   | 5.0  | Q2 |
| IPI00301518; | MOBK1B    | 29.2 | 4.62E-29  | 0.030 | 8   | 9.8  | Q2 |
| IPI00013679; | DUT       | 34.9 | 7.03E-188 | 0.030 | 10  | 2.6  | Q2 |
| IPI00642374; | UCHL5     | 17.1 | 2.22E-21  | 0.030 | 3   | 5.3  | Q2 |
| IPI00479058; | RPS15     | 31   | 5.03E-103 | 0.030 | 10  | 68.8 | Q2 |
| IPI00004472; | WNK1      | 1    | 2.81E-22  | 0.031 | 2   | 11.3 | Q2 |
| IPI00604620; | NCL       | 37.2 | <1.0E-304 | 0.031 | 44  | 9.2  | Q2 |
| IPI00479306; | PSMB5     | 42.2 | 1.00E-111 | 0.031 | 13  | 22.1 | Q2 |
| IPI00022597  | UBE2M     | 42.1 | 6.87E-79  | 0.031 | 8   | 9.4  | Q2 |
| IPI00376005; | EIF5A     | 60.9 | 4.05E-198 | 0.031 | 22  | 7.6  | Q2 |
| IPI00256861; | MACF1     | 37.8 | <1.0E-304 | 0.031 | 234 | 16.5 | Q2 |
| IPI00006725; | DDX23     | 8.9  | 5.23E-25  | 0.031 | 8   | 6.8  | Q2 |
| IPI00798102; | VPS29     | 23.5 | 6.06E-47  | 0.031 | 6   | 2.7  | Q2 |
| IPI00030820; | MRPL47    | 21.6 | 1.15E-24  | 0.032 | 5   | 2.9  | Q2 |
| IPI00012074; | HNRNPR    | 24.8 | 4.14E-199 | 0.033 | 14  | 17.6 | Q2 |
| IPI00902614; | USP24     | 1.8  | 2.56E-57  | 0.033 | 4   | 8.3  | Q2 |
| IPI00061245  | MRPS10    | 17.9 | 1.89E-19  | 0.033 | 2   | 16.0 | Q2 |
| IPI00217920; | ALDH16A1  | 1.6  | 1.82E-29  | 0.034 | 2   | 14.0 | Q2 |
| IPI00021435; | PSMC2     | 52.7 | 1.08E-159 | 0.034 | 10  | 36.5 | Q2 |
| IPI00006980; | C14orf166 | 54.9 | 8.81E-104 | 0.034 | 10  | 14.4 | Q2 |
| IPI00018465; | CCT7      | 51.9 | <1.0E-304 | 0.034 | 11  | 7.6  | Q2 |
| IPI00418313; | ILF3      | 33.1 | 1.37E-298 | 0.034 | 32  | 16.8 | Q2 |
| IPI00307162; | VCL       | 59.7 | <1.0E-304 | 0.034 | 80  | 9.5  | Q2 |
| IPI00004416; | CHMP2A    | 7.2  | 1.42E-04  | 0.035 | 2   | 9.9  | Q2 |
| IPI00013271; | DERL1     | 10.8 | 6.21E-11  | 0.035 | 2   | 15.1 | Q2 |
| IPI00305978; | AKR7A2    | 18.4 | 3.51E-158 | 0.035 | 2   | 10.7 | Q2 |

|              |          |      |           |       |    |      |    |
|--------------|----------|------|-----------|-------|----|------|----|
| IPI00221092; | RPS16    | 69.9 | 2.09E-51  | 0.036 | 19 | 41.0 | Q2 |
| IPI00375531; | NME1     | 7.9  | 7.99E-125 | 0.036 | 2  | 0.1  | Q2 |
| IPI00003519; | EFTUD2   | 27.5 | <1.0E-304 | 0.037 | 28 | 7.9  | Q2 |
| IPI00908416; | EIF4E    | 20.6 | 1.51E-16  | 0.037 | 5  | 7.2  | Q2 |
| IPI00647915; | TAGLN2   | 71.8 | 4.77E-269 | 0.037 | 41 | 17.1 | Q2 |
| IPI00250297  | AASDHPPT | 20.7 | 1.60E-51  | 0.038 | 2  | 5.1  | Q2 |
| IPI00221089  | RPS13    | 51   | 1.15E-62  | 0.038 | 9  | 5.3  | Q2 |
| IPI00646350; | NAE1     | 10.8 | 1.79E-09  | 0.038 | 3  | 10.6 | Q2 |
| IPI00033907; | ANAPC1   | 2.7  | 2.95E-35  | 0.038 | 4  | 10.6 | Q2 |
| IPI00100980; | EHD2     | 15.1 | 4.14E-56  | 0.038 | 6  | 13.8 | Q2 |
| IPI00328840; | THOC4    | 34.1 | 2.01E-159 | 0.038 | 9  | 17.6 | Q2 |
| IPI00791262; | ICT1     | 26.3 | 9.68E-23  | 0.039 | 4  | 1.6  | Q2 |
| IPI00922484; | BUD31    | 24.8 | 2.42E-11  | 0.039 | 4  | 8.1  | Q2 |
| IPI00030770; | PSMG1    | 26.4 | 7.33E-32  | 0.039 | 5  | 15.0 | Q2 |
| IPI00645702  | CTPS2    | 6.1  | 1.92E-19  | 0.039 | 3  | 11.3 | Q2 |
| IPI00010860; | PSMD9    | 35.9 | 2.67E-67  | 0.039 | 6  | 5.1  | Q2 |
| IPI00844578; | DHX9     | 40.8 | <1.0E-304 | 0.039 | 77 | 17.1 | Q2 |
| IPI00872295; | ANXA8    | 48.9 | <1.0E-304 | 0.039 | 23 | 10.8 | Q2 |
| IPI00000494; | RPL5     | 44.8 | 2.42E-272 | 0.040 | 16 | 7.6  | Q2 |
| IPI00032826; | ST13     | 24.9 | 9.13E-90  | 0.040 | 6  | 7.4  | Q2 |
| IPI00477686; | GTF2F2   | 10.4 | 1.36E-09  | 0.040 | 2  | 4.7  | Q2 |
| IPI00290566; | CCT1     | 54   | <1.0E-304 | 0.040 | 14 | 7.8  | Q2 |
| IPI00024425; | KIAA0664 | 27.1 | 7.39E-224 | 0.040 | 33 | 9.3  | Q2 |
| IPI00742682; | TPR      | 15.8 | 9.15E-304 | 0.040 | 37 | 12.8 | Q2 |
| IPI00009235  | SSR3     | 7.1  | 3.59E-20  | 0.040 | 2  | 6.1  | Q2 |
| IPI00219622; | PSMA2    | 54.3 | 7.85E-228 | 0.040 | 14 | 4.7  | Q2 |
| IPI00644482; | PSMG2    | 18.6 | 5.29E-12  | 0.041 | 5  | 3.0  | Q2 |
| IPI00470779  | TXLNA    | 8.1  | 9.28E-09  | 0.042 | 5  | 11.3 | Q2 |
| IPI00001589  | TIMM13   | 73.7 | 1.84E-213 | 0.042 | 2  | 14.6 | Q2 |
| IPI00470883; | STAG2    | 5.2  | 1.49E-40  | 0.042 | 6  | 15.2 | Q2 |
| IPI00216319; | YWHAH    | 44.3 | 5.49E-216 | 0.042 | 10 | 2.3  | Q2 |
| IPI00170692; | VAPA     | 42.6 | 5.85E-75  | 0.042 | 9  | 22.2 | Q2 |
| IPI00100748; | HSPBP1   | 17.8 | 2.45E-48  | 0.042 | 5  | 13.9 | Q2 |

|              |          |      |           |       |    |      |    |
|--------------|----------|------|-----------|-------|----|------|----|
| IPI00299155; | PSMA4    | 55.6 | 1.13E-195 | 0.043 | 16 | 7.1  | Q2 |
| IPI00828150; | SUGT1    | 29.3 | 1.67E-99  | 0.043 | 5  | 6.3  | Q2 |
| IPI00026302; | RPL31    | 48   | 3.90E-42  | 0.044 | 5  | 3.0  | Q2 |
| IPI00790739; | ACO2     | 35   | 3.42E-250 | 0.045 | 15 | 9.8  | Q2 |
| IPI00925713; | RPL10    | 54.3 | 1.96E-97  | 0.045 | 35 | 5.1  | Q2 |
| IPI00644712; | XRCC6    | 48.3 | <1.0E-304 | 0.045 | 19 | 12.0 | Q2 |
| IPI00398708; | KLC1     | 18.3 | 4.65E-34  | 0.045 | 6  | 8.8  | Q2 |
| IPI00410693; | SERBP1   | 43.4 | 6.43E-156 | 0.045 | 11 | 6.6  | Q2 |
| IPI00010349; | AGPS     | 15.3 | 4.59E-151 | 0.045 | 4  | 12.1 | Q2 |
| IPI00008433; | RPS5     | 45.6 | 6.02E-168 | 0.045 | 23 | 7.5  | Q2 |
| IPI00748472; | KIAA0196 | 16.3 | 3.98E-59  | 0.046 | 17 | 6.5  | Q2 |
| IPI00784090; | CCT8     | 65.1 | <1.0E-304 | 0.046 | 18 | 35.0 | Q2 |
| IPI00217661; | RAVER1   | 4.2  | 4.35E-10  | 0.046 | 2  | 4.0  | Q2 |
| IPI00749250; | ACTR2    | 44.1 | 1.31E-232 | 0.046 | 10 | 67.7 | Q2 |
| IPI00005160; | ARPC1B   | 43.3 | 1.02E-103 | 0.047 | 8  | 8.8  | Q2 |
| IPI00794543; | CALM1    | 59.9 | 1.26E-255 | 0.047 | 23 | 54.2 | Q2 |
| IPI00100984; | HEATR3   | 5.1  | 7.70E-13  | 0.047 | 3  | 4.7  | Q2 |
| IPI00009790; | PFKP     | 38.4 | <1.0E-304 | 0.047 | 19 | 6.2  | Q2 |
| IPI00174442; | FAM98A   | 5.2  | 2.15E-48  | 0.048 | 2  | 1.6  | Q2 |
| IPI00297779; | CCT2     | 67.5 | <1.0E-304 | 0.048 | 18 | 12.3 | Q2 |
| IPI00010204; | SFRS3    | 27.4 | 6.91E-47  | 0.049 | 4  | 0.7  | Q2 |
| IPI00061780; | ITCH     | 5.1  | 1.91E-50  | 0.049 | 4  | 6.0  | Q2 |
| IPI00430472; | ASCC3    | 8.8  | 3.56E-63  | 0.049 | 16 | 5.3  | Q2 |
| IPI00007402  | IPO7     | 24.2 | <1.0E-304 | 0.049 | 45 | 13.6 | Q2 |
| IPI00783302; | PTCD3    | 6.2  | 3.66E-63  | 0.049 | 4  | 14.6 | Q2 |
| IPI00001960; | CLIC4    | 58.5 | 1.24E-157 | 0.049 | 9  | 10.2 | Q2 |
| IPI00099550; | UBQLN1   | 17.3 | 1.02E-53  | 0.050 | 6  | 6.9  | Q2 |
| IPI00553185; | CCT3     | 57.6 | <1.0E-304 | 0.050 | 18 | 37.3 | Q2 |
| IPI00028004; | PSMB3    | 49.8 | 2.25E-210 | 0.050 | 13 | 5.5  | Q2 |
| IPI00845273; | URG4     | 2.3  | 4.67E-02  | 0.050 | 2  | 13.8 | Q2 |
| IPI00419979; | PAK2     | 14.1 | 2.14E-41  | 0.051 | 3  | 6.4  | Q2 |
| IPI00033022; | DNM2     | 20.2 | 9.65E-74  | 0.051 | 15 | 15.3 | Q2 |
| IPI00177008  | PGP      | 27.1 | 6.30E-42  | 0.051 | 3  | 3.7  | Q2 |



|              |          |      |           |       |    |      |    |
|--------------|----------|------|-----------|-------|----|------|----|
| IPI00465044  | RCC2     | 19.2 | 2.49E-21  | 0.051 | 5  | 14.0 | Q2 |
| IPI00004968  | PRPF19   | 21.8 | 1.36E-179 | 0.051 | 2  | 6.4  | Q2 |
| IPI00152377; | STT3B    | 7    | 9.55E-40  | 0.052 | 5  | 6.2  | Q2 |
| IPI00032003; | EMD      | 46.1 | 7.35E-268 | 0.052 | 11 | 40.4 | Q2 |
| IPI00219445; | PSME3    | 43.8 | 9.47E-133 | 0.053 | 12 | 7.6  | Q2 |
| IPI00873403; | RPL24    | 34.1 | 4.04E-60  | 0.053 | 11 | 7.2  | Q2 |
| IPI00303207  | ABCE1    | 30.2 | 1.34E-195 | 0.055 | 9  | 10.9 | Q2 |
| IPI00028005; | NUP107   | 5.9  | 2.94E-06  | 0.055 | 6  | 5.0  | Q2 |
| IPI00894287  | HDLBP    | 1.4  | <1.0E-304 | 0.055 | 2  | 0.2  | Q2 |
| IPI00005657; | PFDN6    | 53.5 | 1.77E-44  | 0.055 | 2  | 30.3 | Q2 |
| IPI00291928; | RAB14    | 64.2 | 1.46E-156 | 0.055 | 16 | 5.6  | Q2 |
| IPI00007058; | CORO1B   | 16.4 | 8.93E-42  | 0.056 | 3  | 6.5  | Q2 |
| IPI00790342; | RPL6     | 49.1 | 3.09E-120 | 0.056 | 22 | 30.7 | Q2 |
| IPI00844000  | KIAA0776 | 13.1 | 5.98E-57  | 0.056 | 9  | 8.6  | Q2 |
| IPI00783097; | GARS     | 30.7 | <1.0E-304 | 0.056 | 14 | 6.6  | Q2 |
| IPI00873222; | CCT4     | 55.8 | <1.0E-304 | 0.057 | 17 | 6.3  | Q2 |
| IPI00023101; | RQCD1    | 9.4  | 1.50E-18  | 0.057 | 2  | 3.1  | Q2 |
| IPI00012202; | WDR77    | 10.5 | 1.77E-48  | 0.057 | 2  | 3.6  | Q2 |
| IPI00396627; | ELAC2    | 6.3  | 4.66E-27  | 0.058 | 5  | 27.1 | Q2 |
| IPI00031836; | DRG1     | 28.6 | 1.03E-85  | 0.058 | 5  | 4.0  | Q2 |
| IPI00007927; | SMC2     | 24.6 | 5.35E-187 | 0.059 | 29 | 8.9  | Q2 |
| IPI00641743; | HCFC1    | 4.6  | 6.30E-47  | 0.060 | 8  | 3.8  | Q2 |
| IPI00006952  | LACTB2   | 6.2  | 1.18E-03  | 0.060 | 2  | 9.1  | Q2 |
| IPI00218993; | HSPH1    | 48.3 | <1.0E-304 | 0.060 | 38 | 16.9 | Q2 |
| IPI00298520; | ARCN1    | 27.9 | 1.44E-89  | 0.061 | 9  | 7.6  | Q2 |
| IPI00465132; | COPE     | 58.8 | <1.0E-304 | 0.061 | 17 | 5.4  | Q2 |
| IPI00328748; | ARMET    | 32.1 | 8.45E-94  | 0.061 | 9  | 33.7 | Q2 |
| IPI00843975; | EZR      | 40.8 | 1.03E-291 | 0.061 | 20 | 9.7  | Q2 |
| IPI00412607; | RPL35    | 39   | 4.31E-14  | 0.061 | 7  | 10.6 | Q2 |
| IPI00181702; | SFRS15   | 4.4  | 1.14E-12  | 0.062 | 4  | 2.4  | Q2 |
| IPI00411816; | MRPL2    | 12.5 | 4.56E-02  | 0.063 | 3  | 15.1 | Q2 |
| IPI00216047; | SMARCC2  | 6.6  | 1.43E-121 | 0.063 | 7  | 5.1  | Q2 |
| IPI00032355; | PUM1     | 8.3  | 1.45E-97  | 0.063 | 9  | 5.7  | Q2 |

|              |          |      |           |       |     |      |    |
|--------------|----------|------|-----------|-------|-----|------|----|
| IPI00165026; | SETD3    | 5.1  | 1.66E-10  | 0.064 | 2   | 0.8  | Q2 |
| IPI00018288; | POLR2C   | 34.2 | 1.09E-158 | 0.064 | 7   | 19.1 | Q2 |
| IPI00005260; | PSME4    | 4.4  | 1.93E-46  | 0.064 | 7   | 7.8  | Q2 |
| IPI00655754; | UFD1L    | 18.4 | 2.22E-87  | 0.065 | 3   | 1.5  | Q2 |
| IPI00305267; | GOLGA3   | 3.9  | 1.31E-66  | 0.065 | 5   | 9.2  | Q2 |
| IPI00005158; | LONP1    | 9.9  | 1.12E-52  | 0.065 | 9   | 5.5  | Q2 |
| IPI00915363; | RPS24    | 18.3 | 1.94E-65  | 0.065 | 11  | 10.1 | Q2 |
| IPI00027626; | CCT6A    | 51.4 | 1.68E-297 | 0.065 | 15  | 9.6  | Q2 |
| IPI00023344; | SYMPK    | 12.1 | 6.57E-179 | 0.065 | 14  | 11.5 | Q2 |
| IPI00007019  | PPIL1    | 20.5 | 3.98E-55  | 0.066 | 4   | 5.5  | Q2 |
| IPI00033561; | RNPS1    | 11.5 | 6.29E-53  | 0.066 | 4   | 3.9  | Q2 |
| IPI00023334; | MRPL4    | 19   | 7.01E-42  | 0.066 | 2   | 4.3  | Q2 |
| IPI00023542; | TMED9    | 20   | 2.50E-86  | 0.066 | 10  | 7.8  | Q2 |
| IPI00001710; | FFR      | 2.8  | 3.71E-07  | 0.066 | 2   | 3.6  | Q2 |
| IPI00783872; | CAPRIN1  | 15.1 | 1.23E-51  | 0.067 | 11  | 14.3 | Q2 |
| IPI00023556; | SSU72    | 28.9 | 7.74E-53  | 0.068 | 4   | 40.6 | Q2 |
| IPI00555956  | PSMB4    | 31.8 | 3.15E-191 | 0.068 | 10  | 4.0  | Q2 |
| IPI00914048; | C11orf68 | 11.6 | 7.37E-07  | 0.068 | 2   | 11.7 | Q2 |
| IPI00002902  | NOL9     | 7.3  | 8.78E-38  | 0.068 | 3   | 9.7  | Q2 |
| IPI00396435; | DHX15    | 29.9 | 2.69E-114 | 0.069 | 29  | 8.0  | Q2 |
| IPI00010320; | CBX1     | 22.7 | 1.17E-53  | 0.070 | 2   | 5.4  | Q2 |
| IPI00025019; | PSMB1    | 53.1 | 3.67E-175 | 0.070 | 17  | 30.8 | Q2 |
| IPI00014238; | KARS     | 30.8 | 5.46E-97  | 0.070 | 15  | 9.1  | Q2 |
| IPI00021290; | ACLY     | 49   | <1.0E-304 | 0.070 | 112 | 17.4 | Q2 |
| IPI00009328; | EIF4A3   | 31.4 | 1.36E-118 | 0.070 | 6   | 23.5 | Q2 |
| IPI00023086; | MRPL15   | 23   | 1.55E-83  | 0.070 | 6   | 9.7  | Q2 |
| IPI00022228; | HDLBP    | 39.1 | <1.0E-304 | 0.070 | 57  | 6.3  | Q2 |
| IPI00220344; | RPL36A   | 46.2 | 5.45E-22  | 0.071 | 4   | 11.1 | Q2 |
| IPI00180675; | TUBA1A   | 66.1 | <1.0E-304 | 0.071 | 43  | 75.0 | Q2 |
| IPI00477155; | GTPBP4   | 19.5 | 1.59E-73  | 0.072 | 7   | 10.0 | Q2 |
| IPI00305064; | CD44     | 8    | 1.28E-74  | 0.072 | 9   | 44.1 | Q2 |
| IPI00295066; | MRPL48   | 16.5 | 1.86E-33  | 0.073 | 2   | 6.8  | Q2 |
| IPI00219153; | RPL22    | 32   | 2.80E-57  | 0.073 | 4   | 3.9  | Q2 |

|              |         |      |           |       |    |       |    |
|--------------|---------|------|-----------|-------|----|-------|----|
| IPI00889541; | DDX17   | 21.1 | 2.68E-163 | 0.073 | 6  | 6.6   | Q2 |
| IPI00549189; | THOP1   | 15.7 | 2.73E-60  | 0.074 | 6  | 7.8   | Q2 |
| IPI00743698; | PTPRA   | 3.1  | 3.66E-19  | 0.074 | 2  | 7.8   | Q2 |
| IPI00015856; | DNPEP   | 8.3  | 1.76E-10  | 0.074 | 2  | 18.4  | Q2 |
| IPI00218782; | CAPZB   | 46.3 | 6.55E-208 | 0.075 | 15 | 6.5   | Q2 |
| IPI00019385; | SSR4    | 34.2 | 1.20E-76  | 0.075 | 4  | 1.7   | Q2 |
| IPI00871695; | DEK     | 16.5 | 1.11E-46  | 0.075 | 5  | 11.7  | Q2 |
| IPI00847168; | RSU1    | 33.6 | 8.28E-59  | 0.075 | 8  | 8.0   | Q2 |
| IPI00395627; | CACYBP  | 58.3 | 4.86E-121 | 0.075 | 10 | 11.4  | Q2 |
| IPI00020454  | DCK     | 11.2 | 5.34E-03  | 0.075 | 4  | 5.6   | Q2 |
| IPI00162563; | RNF40   | 5.3  | 5.05E-30  | 0.076 | 4  | 17.8  | Q2 |
| IPI00413344; | CFL2    | 37.3 | 8.10E-127 | 0.076 | 5  | 21.5  | Q2 |
| IPI00100796  | CHMP5   | 28.3 | 9.16E-131 | 0.077 | 7  | 3.0   | Q2 |
| IPI00295857; | COPA    | 46.5 | <1.0E-304 | 0.077 | 62 | 8.7   | Q2 |
| IPI00010740; | SFPQ    | 45.3 | <1.0E-304 | 0.077 | 40 | 11.4  | Q2 |
| IPI00100160; | CAND1   | 36.7 | <1.0E-304 | 0.077 | 50 | 9.5   | Q2 |
| IPI00411901; | DLG5    | 1.8  | 1.17E-19  | 0.078 | 3  | 7.2   | Q2 |
| IPI00010720; | CCT5    | 50.1 | 2.96E-275 | 0.078 | 17 | 8.7   | Q2 |
| IPI00221235; | NUP160  | 9.3  | 7.56E-54  | 0.078 | 13 | 6.2   | Q2 |
| IPI00005537; | MRPL12  | 39.9 | 1.44E-52  | 0.079 | 5  | 38.0  | Q2 |
| IPI00719040; | C1orf77 | 11.6 | 4.32E-07  | 0.079 | 3  | 0.4   | Q2 |
| IPI00645446; | MCTS1   | 46.7 | 2.46E-157 | 0.080 | 9  | 5.4   | Q2 |
| IPI00218343; | TUBA1C  | 12.2 | <1.0E-304 | 0.080 | 11 | 170.3 | Q2 |
| IPI00020042; | PSMC4   | 31.8 | 1.09E-173 | 0.081 | 6  | 8.9   | Q2 |
| IPI00797574; | FAM44A  | 1.4  | 2.02E-11  | 0.082 | 4  | 16.2  | Q2 |
| IPI00873253; | SEC11A  | 17.1 | 9.45E-21  | 0.082 | 5  | 16.0  | Q2 |
| IPI00909772; | AP2M1   | 19.8 | 8.80E-32  | 0.082 | 5  | 53.4  | Q2 |
| IPI00032851; | COPZ1   | 30.5 | 2.76E-119 | 0.082 | 6  | 1.8   | Q2 |
| IPI00555597; | PTRH2   | 39.4 | 8.37E-145 | 0.083 | 5  | 6.1   | Q2 |
| IPI00026627  | RP2     | 5.1  | 9.86E-04  | 0.083 | 2  | 35.7  | Q2 |
| IPI00903119; | SMS     | 18.2 | 3.83E-101 | 0.083 | 4  | 4.2   | Q2 |
| IPI00332371; | PFKL    | 11.8 | 1.09E-179 | 0.084 | 6  | 5.7   | Q2 |
| IPI00003362; | HSPA5   | 53.4 | <1.0E-304 | 0.084 | 36 | 10.3  | Q2 |

|              |          |      |           |       |    |      |    |
|--------------|----------|------|-----------|-------|----|------|----|
| IPI00171573; | CCDC109A | 22.5 | 7.11E-23  | 0.085 | 4  | 5.6  | Q2 |
| IPI00792352; | RAN      | 44.9 | 2.25E-164 | 0.085 | 24 | 14.9 | Q2 |
| IPI00303476; | ATP5B    | 61.1 | <1.0E-304 | 0.085 | 27 | 10.7 | Q2 |
| IPI00026182; | CAPZA2   | 31.5 | 1.31E-73  | 0.085 | 3  | 16.3 | Q2 |
| IPI00013070; | HNRNPUL1 | 14.6 | 7.90E-91  | 0.085 | 11 | 23.0 | Q2 |
| IPI00440493; | ATP5A1   | 56.1 | <1.0E-304 | 0.086 | 20 | 20.7 | Q2 |
| IPI00329692; | NMT1     | 20   | 8.01E-90  | 0.086 | 5  | 10.1 | Q2 |
| IPI00009464; | EXOSC10  | 10.1 | 3.75E-96  | 0.086 | 7  | 11.9 | Q2 |
| IPI00299254  | EIF5B    | 27.4 | 7.52E-248 | 0.086 | 37 | 12.6 | Q2 |
| IPI00217013; | SMEK1    | 3.1  | 1.20E-03  | 0.087 | 2  | 2.7  | Q2 |
| IPI00479191; | HNRNPH1  | 31.6 | 3.03E-230 | 0.087 | 12 | 14.5 | Q2 |
| IPI00220834; | XRCC5    | 39.6 | 9.30E-246 | 0.087 | 34 | 10.8 | Q2 |
| IPI00419531; | CPSF2    | 3.8  | 9.34E-28  | 0.088 | 3  | 5.6  | Q2 |
| IPI00218475; | IFI35    | 26   | 3.84E-38  | 0.088 | 3  | 11.4 | Q2 |
| IPI00009771; | LMNB2    | 36.3 | 4.14E-199 | 0.088 | 15 | 19.2 | Q2 |
| IPI00054042; | GTF2I    | 22.5 | 5.90E-94  | 0.088 | 26 | 45.8 | Q2 |
| IPI00644079; | HNRNPU   | 36.1 | <1.0E-304 | 0.088 | 47 | 6.6  | Q2 |
| IPI00872762; | SUCLG1   | 22   | 5.27E-63  | 0.089 | 6  | 10.4 | Q2 |
| IPI00010845; | NDUFS8   | 27.1 | 3.29E-40  | 0.090 | 4  | 13.9 | Q2 |
| IPI00011302  | CD59     | 25   | 3.46E-27  | 0.090 | 6  | 3.2  | Q2 |
| IPI00219005  | FKBP4    | 66.2 | <1.0E-304 | 0.091 | 12 | 44.0 | Q2 |
| IPI00014151; | PSMD6    | 42.4 | 1.08E-128 | 0.091 | 7  | 16.2 | Q2 |
| IPI00294159; | SLC25A1  | 28.9 | 1.23E-48  | 0.091 | 11 | 5.6  | Q2 |
| IPI00015905; | EXOSC2   | 15   | 8.11E-68  | 0.091 | 3  | 2.7  | Q2 |
| IPI00026824  | HMOX2    | 35.9 | 7.09E-83  | 0.091 | 6  | 4.7  | Q2 |
| IPI00641829; | BAT1     | 39.3 | 2.24E-187 | 0.092 | 24 | 6.9  | Q2 |
| IPI00024013; | UBE2D3   | 12.2 | 7.61E-10  | 0.092 | 2  | 18.5 | Q2 |
| IPI00028931  | DSG2     | 4.5  | 9.43E-25  | 0.092 | 4  | 7.4  | Q2 |
| IPI00239406; | SYNE2    | 9.2  | 2.75E-199 | 0.092 | 64 | 14.4 | Q2 |
| IPI00289776; | MYCBP2   | 4.3  | 1.52E-39  | 0.093 | 18 | 9.3  | Q2 |
| IPI00026271; | RPS14    | 39.7 | 1.85E-175 | 0.093 | 11 | 10.3 | Q2 |
| IPI00005613; | U2AF1    | 35   | 5.43E-93  | 0.093 | 7  | 7.3  | Q2 |
| IPI00023860; | NAP1L1   | 19.9 | 1.82E-235 | 0.094 | 5  | 16.2 | Q2 |

|              |          |      |           |       |     |      |    |
|--------------|----------|------|-----------|-------|-----|------|----|
| IPI00853201; | MRPL23   | 27.2 | 1.46E-33  | 0.094 | 4   | 16.6 | Q2 |
| IPI00006025; | SART3    | 11.4 | 2.87E-75  | 0.095 | 10  | 5.7  | Q2 |
| IPI00854642; | PDS5A    | 21.8 | 9.69E-181 | 0.095 | 27  | 8.6  | Q2 |
| IPI00478410; | ATP5C1   | 31.5 | 1.64E-90  | 0.095 | 9   | 5.1  | Q2 |
| IPI00411730; | PPP4R1   | 17.8 | 1.15E-123 | 0.095 | 10  | 8.7  | Q2 |
| IPI00014053; | TOMM40   | 16.1 | 3.19E-30  | 0.096 | 3   | 5.0  | Q2 |
| IPI00009342; | IQGAP1   | 51.5 | <1.0E-304 | 0.096 | 104 | 7.7  | Q2 |
| IPI00746351; | DIS3     | 14.1 | 9.77E-104 | 0.096 | 11  | 22.6 | Q2 |
| IPI00171856  | DOHH     | 14.6 | 8.24E-22  | 0.097 | 3   | 5.7  | Q2 |
| IPI00456664; | NIT1     | 26.4 | 1.44E-43  | 0.098 | 4   | 29.4 | Q2 |
| IPI00293464; | DDB1     | 35.6 | 4.79E-237 | 0.098 | 44  | 9.4  | Q2 |
| IPI00298281  | LAMC1    | 6.8  | 3.60E-87  | 0.098 | 10  | 16.5 | Q2 |
| IPI00007334; | ACIN1    | 0.5  | 9.55E-03  | 0.098 | 2   | 29.9 | Q2 |
| IPI00002408; | RPAP3    | 3.6  | 5.12E-08  | 0.099 | 2   | 2.5  | Q2 |
| IPI00395887; | TMX1     | 22.5 | 4.23E-45  | 0.099 | 7   | 5.6  | Q2 |
| IPI00007814; | ATP6V1C1 | 15.2 | 6.17E-29  | 0.100 | 3   | 5.2  | Q2 |
| IPI00307749; | NDUFS7   | 7.7  | 3.13E-18  | 0.100 | 2   | 12.4 | Q2 |
| IPI00031655  | VPS25    | 15.9 | 4.68E-07  | 0.100 | 2   | 9.2  | Q2 |
| IPI00295851  | COPB1    | 41.9 | <1.0E-304 | 0.101 | 37  | 6.2  | Q2 |
| IPI00304596; | NONO     | 37.2 | 8.87E-256 | 0.101 | 10  | 20.6 | Q2 |
| IPI00170877; | MRPL10   | 7    | 8.80E-67  | 0.101 | 2   | 13.4 | Q2 |
| IPI00414858; | COG3     | 7.5  | 1.12E-44  | 0.102 | 4   | 12.4 | Q2 |
| IPI00292894  | TSR1     | 11.7 | 2.89E-46  | 0.102 | 7   | 8.3  | Q2 |
| IPI00031615; | LLPH     | 29.5 | 2.13E-17  | 0.102 | 5   | 4.4  | Q2 |
| IPI00022386; | TXNDC9   | 21.2 | 1.01E-04  | 0.103 | 5   | 3.4  | Q2 |
| IPI00093057  | CPOX     | 6.8  | 1.16E-19  | 0.104 | 2   | 0.6  | Q2 |
| IPI00294501  | DHCR7    | 16.6 | 7.47E-49  | 0.104 | 3   | 5.4  | Q2 |
| IPI00007084  | SLC25A13 | 21   | 5.83E-192 | 0.105 | 9   | 8.4  | Q2 |
| IPI00784161; | SUPT6H   | 1.9  | 8.89E-09  | 0.105 | 3   | 10.5 | Q2 |
| IPI00030915; | USP8     | 2.4  | 1.05E-28  | 0.105 | 2   | 5.1  | Q2 |
| IPI00007074  | YARS     | 33.9 | 1.73E-38  | 0.105 | 5   | 4.9  | Q2 |
| IPI00033025; | 7-Sep    | 26.3 | 1.41E-196 | 0.106 | 7   | 13.5 | Q2 |
| IPI00479786; | KHSRP    | 32.5 | 6.42E-141 | 0.106 | 20  | 42.7 | Q2 |

|              |          |      |           |       |    |       |    |
|--------------|----------|------|-----------|-------|----|-------|----|
| IPI00099871; | MRPL40   | 16   | 2.10E-31  | 0.107 | 4  | 7.0   | Q2 |
| IPI00014938; | SARNP    | 31.9 | 5.09E-76  | 0.108 | 2  | 12.9  | Q2 |
| IPI00871856; | STIP1    | 54.7 | 2.90E-233 | 0.108 | 28 | 16.8  | Q2 |
| IPI00006052  | PFDN2    | 41.6 | 2.37E-69  | 0.108 | 6  | 8.0   | Q2 |
| IPI00006715; | RAD21    | 3    | 4.64E-02  | 0.108 | 2  | 2.9   | Q2 |
| IPI00158615; | THOC2    | 4.5  | 4.78E-54  | 0.109 | 7  | 6.0   | Q2 |
| IPI00456887; | HNRNPUL2 | 31.3 | 2.30E-221 | 0.109 | 20 | 8.6   | Q2 |
| IPI00011118; | RRM2     | 17.1 | 9.94E-103 | 0.109 | 3  | 5.4   | Q2 |
| IPI00745568; | TIPRL    | 23.9 | 6.16E-28  | 0.110 | 4  | 7.6   | Q2 |
| IPI00293331  | POP1     | 14.9 | 4.05E-76  | 0.110 | 12 | 6.0   | Q2 |
| IPI00334159  | VBP1     | 33.5 | 2.12E-59  | 0.110 | 6  | 5.2   | Q2 |
| IPI00292020  | SRM      | 39.4 | 9.90E-103 | 0.110 | 11 | 5.0   | Q2 |
| IPI00168479; | APOA1BP  | 16   | 4.18E-106 | 0.111 | 5  | 7.4   | Q2 |
| IPI00247871; | TCERG1   | 19   | 1.65E-88  | 0.111 | 21 | 10.2  | Q2 |
| IPI00014253  | RRS1     | 15.3 | 9.28E-24  | 0.112 | 2  | 7.9   | Q2 |
| IPI00217467  | HIST1H1E | 15.5 | 6.90E-76  | 0.112 | 2  | 4.1   | Q2 |
| IPI00871585; | BID      | 25.3 | 3.40E-42  | 0.112 | 3  | 15.5  | Q2 |
| IPI00009680  | MRPL44   | 17.5 | 5.39E-48  | 0.112 | 2  | 7.1   | Q2 |
| IPI00002557; | COPG2    | 9.4  | 3.25E-158 | 0.112 | 7  | 19.6  | Q2 |
| IPI00003865; | HSPA8    | 65   | <1.0E-304 | 0.112 | 53 | 11.8  | Q2 |
| IPI00073602  | EXOSC6   | 25   | 2.85E-70  | 0.112 | 4  | 9.8   | Q2 |
| IPI00007691; | TRAPPC4  | 40.2 | 2.65E-46  | 0.112 | 5  | 5.6   | Q2 |
| IPI00219365; | MSN      | 62   | <1.0E-304 | 0.113 | 44 | 13.2  | Q2 |
| IPI00015956; | EXOSC3   | 17.1 | 9.41E-103 | 0.113 | 3  | 4.3   | Q2 |
| IPI00221035; | BTF3     | 45.6 | 1.29E-96  | 0.113 | 17 | 7.5   | Q2 |
| IPI00797126; | NACA     | 7.8  | 1.45E-137 | 0.114 | 15 | 8.2   | Q2 |
| IPI00045914; | SPEN     | 0.5  | 4.62E-02  | 0.114 | 2  | 8.9   | Q2 |
| IPI00000783; | PSMB8    | 30.1 | 4.01E-63  | 0.114 | 5  | 9.5   | Q2 |
| IPI00925052; | ARPC4    | 31.6 | 3.52E-30  | 0.115 | 5  | 4.4   | Q2 |
| IPI00219018; | GAPDH    | 74.6 | <1.0E-304 | 0.115 | 68 | 142.6 | Q2 |
| IPI00179757  | KIF1C    | 3    | 8.77E-24  | 0.116 | 3  | 4.4   | Q2 |
| IPI00013860; | HIBADH   | 28.6 | 2.73E-128 | 0.116 | 9  | 18.6  | Q2 |
| IPI00030320  | DDX6     | 24.4 | 8.39E-89  | 0.116 | 2  | 5.9   | Q2 |

|              |           |      |           |       |     |       |    |
|--------------|-----------|------|-----------|-------|-----|-------|----|
| IPI00015602; | TOMM70A   | 11.7 | 1.42E-121 | 0.116 | 7   | 22.5  | Q2 |
| IPI00643920; | TKT       | 49.6 | <1.0E-304 | 0.116 | 21  | 57.3  | Q2 |
| IPI00480142; | CUL4B     | 4.3  | 2.42E-11  | 0.116 | 5   | 22.8  | Q2 |
| IPI00878611; | RANBP1    | 25.4 | 6.33E-51  | 0.117 | 7   | 4.5   | Q2 |
| IPI00549381  | MRPL1     | 24.3 | 1.40E-80  | 0.117 | 5   | 10.2  | Q2 |
| IPI00477971; | TBL3      | 16.2 | 7.78E-139 | 0.118 | 10  | 10.0  | Q2 |
| IPI00026781  | FASN      | 52   | <1.0E-304 | 0.118 | 228 | 23.4  | Q2 |
| IPI00001159; | GCN1L1    | 32.5 | <1.0E-304 | 0.119 | 103 | 10.3  | Q2 |
| IPI00033030; | ADRM1     | 15.5 | 3.53E-35  | 0.120 | 3   | 0.7   | Q2 |
| IPI00301419; | COPS7A    | 16   | 1.83E-25  | 0.120 | 2   | 5.6   | Q2 |
| IPI00456940; | RPL7L1    | 22.8 | 4.06E-22  | 0.121 | 5   | 10.3  | Q2 |
| IPI00024167  | ESF1      | 3.5  | 5.64E-03  | 0.121 | 4   | 8.3   | Q2 |
| IPI00297572; | AQR       | 3.8  | 2.72E-08  | 0.121 | 6   | 21.6  | Q2 |
| IPI00304187; | RBM28     | 7.5  | 7.11E-17  | 0.122 | 6   | 18.6  | Q2 |
| IPI00011654; | TUBB      | 73.4 | <1.0E-304 | 0.122 | 91  | 109.4 | Q2 |
| IPI00296353; | ARHGAP18  | 9.5  | 1.25E-88  | 0.123 | 4   | 2.1   | Q2 |
| IPI00328319; | RBBP4     | 18.8 | 5.61E-39  | 0.123 | 8   | 110.2 | Q2 |
| IPI00456925; | DBNL      | 38.6 | 5.59E-94  | 0.124 | 3   | 10.8  | Q2 |
| IPI00555565  | HSP90AB4P | 2.2  | 1.50E-68  | 0.124 | 2   | 1.6   | Q2 |
| IPI00428967; | TIRAP3    | 8.4  | 1.84E-15  | 0.124 | 2   | 3.4   | Q2 |
| IPI00784154; | HSPD1     | 61.6 | <1.0E-304 | 0.124 | 43  | 100.3 | Q2 |
| IPI00015973; | EPB41L2   | 14.1 | 2.21E-105 | 0.125 | 12  | 16.5  | Q2 |
| IPI00005179; | POLR1C    | 12.4 | 3.28E-112 | 0.125 | 3   | 9.4   | Q2 |
| IPI00012197  | DCTPP1    | 44.1 | 5.30E-63  | 0.125 | 6   | 36.1  | Q2 |
| IPI00024976  | TOMM22    | 66.2 | 1.27E-176 | 0.126 | 7   | 2.5   | Q2 |
| IPI00185146  | IPO9      | 20   | 4.05E-145 | 0.126 | 24  | 11.0  | Q2 |
| IPI00299507; | NCAPH     | 10.4 | 1.09E-24  | 0.126 | 7   | 40.9  | Q2 |
| IPI00251559; | RNF20     | 7.7  | 7.13E-41  | 0.126 | 8   | 13.4  | Q2 |
| IPI00219037  | H2AFX     | 42.7 | 2.64E-69  | 0.126 | 6   | 287.4 | Q2 |
| IPI00008240; | MARS      | 29.2 | 7.84E-287 | 0.126 | 22  | 5.5   | Q2 |
| IPI00008575; | KHDRBS1   | 18.5 | 2.93E-63  | 0.127 | 5   | 6.2   | Q2 |
| IPI00329629; | DNAJC7    | 10.3 | 2.65E-15  | 0.127 | 3   | 8.9   | Q2 |
| IPI00026108; | PLA2G4A   | 2.9  | 3.04E-05  | 0.128 | 2   | 18.3  | Q2 |

|              |         |      |           |       |     |      |    |
|--------------|---------|------|-----------|-------|-----|------|----|
| IPI00012490; | ATP2B4  | 17.9 | 1.73E-261 | 0.128 | 19  | 9.6  | Q2 |
| IPI00797279; | UHRF1   | 5.5  | 8.35E-13  | 0.130 | 4   | 18.5 | Q2 |
| IPI00428288; | MRPL43  | 42.1 | 1.25E-46  | 0.130 | 6   | 3.7  | Q2 |
| IPI00455210; | CHD4    | 12.9 | 1.36E-203 | 0.130 | 28  | 7.1  | Q2 |
| IPI00746655; | FAM62A  | 32.9 | <1.0E-304 | 0.130 | 41  | 17.6 | Q2 |
| IPI00219774; | PRKAR2A | 21.5 | 1.64E-80  | 0.130 | 3   | 16.2 | Q2 |
| IPI00010153; | RPL23   | 57.9 | 1.01E-193 | 0.130 | 10  | 5.1  | Q2 |
| IPI00009032; | SSB     | 40.9 | 1.25E-110 | 0.131 | 9   | 13.7 | Q2 |
| IPI00333068; | ARPC1A  | 18.9 | 3.50E-30  | 0.131 | 2   | 3.3  | Q2 |
| IPI00177965; | NT5DC1  | 11.4 | 6.26E-47  | 0.131 | 2   | 0.6  | Q2 |
| IPI00301489; | UROD    | 10.1 | 1.19E-10  | 0.131 | 2   | 8.9  | Q2 |
| IPI00306723; | CEBPZ   | 10.6 | 5.35E-42  | 0.131 | 11  | 5.0  | Q2 |
| IPI00910593; | CNN2    | 50.3 | 9.31E-187 | 0.132 | 14  | 7.6  | Q2 |
| IPI00290461; | EIF3J   | 28.3 | 8.58E-43  | 0.132 | 5   | 9.1  | Q2 |
| IPI00024067; | CLTC    | 50.3 | <1.0E-304 | 0.133 | 173 | 11.8 | Q2 |
| IPI00021258; | ARFIP1  | 15.3 | 5.39E-22  | 0.133 | 2   | 2.8  | Q2 |
| IPI00025347; | EMG1    | 38.1 | 1.00E-72  | 0.133 | 7   | 6.3  | Q2 |
| IPI00793443; | IPO5    | 39.9 | <1.0E-304 | 0.133 | 59  | 12.4 | Q2 |
| IPI00646361; | NUP214  | 5.5  | 2.86E-37  | 0.133 | 11  | 10.2 | Q2 |
| IPI00007675; | DYNC1L1 | 11.3 | 7.38E-59  | 0.134 | 2   | 36.9 | Q2 |
| IPI00021766; | RTN4    | 8    | 1.63E-70  | 0.134 | 5   | 17.6 | Q2 |
| IPI00102173; | UBE2E2  | 17.9 | 2.64E-40  | 0.135 | 3   | 23.5 | Q2 |
| IPI00174852; | MED20   | 14.6 | 1.85E-05  | 0.135 | 2   | 6.2  | Q2 |
| IPI00168885; | DHX57   | 3.2  | 9.97E-29  | 0.135 | 4   | 10.4 | Q2 |
| IPI00179298; | HUWE1   | 16   | <1.0E-304 | 0.136 | 75  | 15.7 | Q2 |
| IPI00216951; | DARS    | 55.9 | 1.63E-175 | 0.136 | 10  | 7.0  | Q2 |
| IPI00009976  | TMED1   | 4    | 6.43E-04  | 0.136 | 2   | 13.0 | Q2 |
| IPI00640088; | CSNK2B  | 44.4 | 1.55E-114 | 0.136 | 12  | 9.4  | Q2 |
| IPI00293564; | HMGCL   | 27.4 | 4.42E-108 | 0.136 | 4   | 14.7 | Q2 |
| IPI00479534; | CRSP3   | 4.4  | 1.76E-17  | 0.137 | 6   | 6.0  | Q2 |
| IPI00746934; | UBR4    | 18.5 | <1.0E-304 | 0.138 | 116 | 16.4 | Q2 |
| IPI00003309; | POLR2H  | 38.7 | 2.63E-53  | 0.138 | 5   | 7.0  | Q2 |
| IPI00031410  | FRAP1   | 2.6  | 4.54E-69  | 0.138 | 6   | 10.9 | Q2 |



|              |          |      |           |       |     |      |    |
|--------------|----------|------|-----------|-------|-----|------|----|
| IPI00549248; | NPM1     | 55.1 | 1.63E-303 | 0.139 | 61  | 12.7 | Q2 |
| IPI00033130; | SAE1     | 26   | 6.58E-56  | 0.140 | 3   | 6.8  | Q2 |
| IPI00014439; | QDPR     | 22.5 | 8.24E-132 | 0.140 | 3   | 3.9  | Q2 |
| IPI00291939; | SMC1A    | 21   | 1.35E-227 | 0.141 | 25  | 10.4 | Q2 |
| IPI00009958; | COPSS    | 33.2 | 2.97E-43  | 0.141 | 6   | 9.1  | Q2 |
| IPI00844215; | SPTAN1   | 38.6 | <1.0E-304 | 0.142 | 102 | 27.0 | Q2 |
| IPI00646058; | SAFB     | 20.9 | 5.75E-96  | 0.142 | 19  | 6.9  | Q2 |
| IPI00005737; | SURF4    | 18.6 | 1.24E-54  | 0.143 | 8   | 5.6  | Q2 |
| IPI00027983  | CDA      | 46.6 | 5.95E-84  | 0.143 | 4   | 36.9 | Q2 |
| IPI00171636; | NAV1     | 1    | 4.09E-16  | 0.144 | 2   | 15.1 | Q2 |
| IPI00019169; | SH3GL1   | 22.6 | 6.39E-94  | 0.144 | 2   | 10.8 | Q2 |
| IPI00010810; | ETFA     | 48.3 | 2.23E-253 | 0.145 | 14  | 9.3  | Q2 |
| IPI00220648  | PMVK     | 40.1 | 4.71E-51  | 0.145 | 5   | 15.9 | Q2 |
| IPI00013290; | HDGFRP2  | 4.1  | 2.61E-44  | 0.145 | 2   | 3.6  | Q2 |
| IPI00011619; | PAPSS1   | 14.9 | 3.00E-62  | 0.146 | 7   | 4.9  | Q2 |
| IPI00011937; | PRDX4    | 26.9 | 3.29E-25  | 0.146 | 6   | 2.6  | Q2 |
| IPI00894104  | HEATR2   | 15.1 | 4.85E-49  | 0.147 | 8   | 6.4  | Q2 |
| IPI00152692  | DTD1     | 14.8 | 7.33E-58  | 0.147 | 2   | 6.0  | Q2 |
| IPI00032459; | AP3M1    | 16.3 | 3.28E-72  | 0.147 | 4   | 10.8 | Q2 |
| IPI00329591; | RMND1    | 5.8  | 1.80E-06  | 0.148 | 2   | 12.5 | Q2 |
| IPI00024911; | ERP29    | 47.5 | 1.43E-121 | 0.148 | 10  | 5.0  | Q2 |
| IPI00294779; | VDAC3    | 39.8 | 5.40E-96  | 0.148 | 9   | 21.0 | Q2 |
| IPI00183002; | PPP1R12A | 18.9 | 1.66E-171 | 0.148 | 18  | 16.6 | Q2 |
| IPI00017596; | MAPRE1   | 39.2 | 7.51E-181 | 0.149 | 7   | 4.9  | Q2 |
| IPI00735181; | UNC45A   | 22.6 | 7.21E-181 | 0.150 | 21  | 33.6 | Q2 |
| IPI00219729; | SLC25A11 | 51.9 | 1.60E-117 | 0.150 | 9   | 12.2 | Q2 |
| IPI00874185; | HIBCH    | 9.9  | 9.47E-26  | 0.150 | 2   | 0.4  | Q2 |
| IPI00718888; | PRPS2    | 30.8 | 8.85E-157 | 0.151 | 4   | 10.6 | Q2 |
| IPI00291751; | C2orf47  | 10.3 | 1.48E-18  | 0.152 | 2   | 10.0 | Q2 |
| IPI00337397; | NUP98    | 6.1  | 2.19E-44  | 0.153 | 10  | 12.7 | Q2 |
| IPI00003881  | HNRNPF   | 27.7 | 1.46E-196 | 0.153 | 5   | 8.6  | Q2 |
| IPI00217540; | KDM1     | 7.8  | 8.44E-120 | 0.153 | 6   | 10.7 | Q2 |
| IPI00023987; | PPCS     | 22.5 | 1.71E-18  | 0.154 | 5   | 4.7  | Q2 |

|              |         |      |           |       |    |       |    |
|--------------|---------|------|-----------|-------|----|-------|----|
| IPI00001757; | RBM8A   | 31.6 | 4.46E-57  | 0.154 | 4  | 14.3  | Q2 |
| IPI00642904; | PABPC4  | 10.6 | 2.84E-224 | 0.154 | 3  | 2.7   | Q2 |
| IPI00329696; | FAM82B  | 21.3 | 1.42E-27  | 0.154 | 6  | 8.0   | Q2 |
| IPI00410259; | PHLDB2  | 3.9  | 5.81E-53  | 0.155 | 4  | 4.7   | Q2 |
| IPI00069817; | BAZ1B   | 1.8  | 3.64E-09  | 0.155 | 2  | 0.9   | Q2 |
| IPI00009480; | COPS8   | 34.9 | 7.18E-82  | 0.155 | 4  | 4.1   | Q2 |
| IPI00307155; | ROCK2   | 12.8 | 1.27E-94  | 0.156 | 16 | 20.7  | Q2 |
| IPI00099996  | RG9MTD1 | 30   | 5.23E-107 | 0.156 | 7  | 10.5  | Q2 |
| IPI00010244; | MRPS11  | 13.4 | 1.11E-02  | 0.158 | 2  | 8.5   | Q2 |
| IPI00550239  | H1F0    | 23.7 | 1.56E-49  | 0.158 | 10 | 21.4  | Q2 |
| IPI00396967; | FHL2    | 33.7 | 9.64E-121 | 0.158 | 8  | 8.4   | Q2 |
| IPI00296635  | GBE1    | 8.3  | 3.08E-10  | 0.159 | 2  | 25.0  | Q2 |
| IPI00025252; | PDIA3   | 61.2 | <1.0E-304 | 0.159 | 12 | 124.2 | Q2 |
| IPI00020567; | ARHGAP1 | 24.2 | 6.64E-37  | 0.159 | 2  | 9.7   | Q2 |
| IPI00011250; | UCHL3   | 46.1 | 1.69E-113 | 0.159 | 8  | 8.4   | Q2 |
| IPI00009057; | G3BP2   | 13.1 | 2.65E-87  | 0.159 | 5  | 5.9   | Q2 |
| IPI00167941; | MDN1    | 8.6  | 6.65E-124 | 0.159 | 47 | 9.1   | Q2 |
| IPI00604590; | NME1    | 71.9 | 3.14E-195 | 0.160 | 29 | 13.4  | Q2 |
| IPI00000875; | EEF1G   | 44.4 | 2.22E-232 | 0.160 | 25 | 10.9  | Q2 |
| IPI00025796  | NDUFS3  | 40.9 | 9.39E-165 | 0.160 | 7  | 4.3   | Q2 |
| IPI00004839  | CRKL    | 36.6 | 1.78E-153 | 0.161 | 3  | 46.3  | Q2 |
| IPI00020513; | ZYX     | 13.3 | 2.46E-55  | 0.162 | 4  | 10.7  | Q2 |
| IPI00024006; | PIK3R4  | 7    | 6.71E-61  | 0.162 | 9  | 6.1   | Q2 |
| IPI00219526; | PGM1    | 20.6 | 7.81E-44  | 0.162 | 4  | 7.9   | Q2 |
| IPI00604624; | NIF3L1  | 16.4 | 1.38E-35  | 0.162 | 2  | 3.6   | Q2 |
| IPI00031461; | GDI2    | 70.8 | <1.0E-304 | 0.163 | 29 | 64.7  | Q2 |
| IPI00157734; | EXOC3   | 4.6  | 1.18E-09  | 0.163 | 2  | 19.1  | Q2 |
| IPI00916503; | BZW1    | 33.9 | 1.19E-54  | 0.163 | 11 | 9.1   | Q2 |
| IPI00166044; | RPTOR   | 2.7  | 1.22E-19  | 0.164 | 3  | 7.5   | Q2 |
| IPI00289082; | PTPN12  | 5.4  | 5.76E-30  | 0.164 | 2  | 4.7   | Q2 |
| IPI00465294; | CDC5L   | 16.8 | 7.58E-195 | 0.164 | 12 | 22.3  | Q2 |
| IPI00444371; | WDR44   | 8.4  | 9.67E-76  | 0.165 | 6  | 7.1   | Q2 |
| IPI00008223; | RAD23B  | 21.8 | 8.94E-141 | 0.165 | 6  | 7.3   | Q2 |

|              |         |      |           |       |    |      |    |
|--------------|---------|------|-----------|-------|----|------|----|
| IPI00300127; | NAT10   | 20.5 | 1.28E-159 | 0.165 | 29 | 64.1 | Q2 |
| IPI00022334  | OAT     | 42.6 | 4.55E-216 | 0.165 | 3  | 10.6 | Q2 |
| IPI00215918; | ARF4    | 38.9 | 5.60E-152 | 0.166 | 12 | 6.1  | Q2 |
| IPI00413895; | GOLGA2  | 15   | 7.86E-91  | 0.166 | 12 | 8.4  | Q2 |
| IPI00000581; | OTUB1   | 47.4 | 1.17E-194 | 0.166 | 13 | 8.2  | Q2 |
| IPI00783559  | EXOC2   | 5.7  | 6.80E-20  | 0.166 | 4  | 4.0  | Q2 |
| IPI00219446; | PEBP1   | 79.7 | 2.97E-304 | 0.166 | 11 | 6.2  | Q2 |
| IPI00011970; | HSD17B7 | 12.3 | 5.94E-21  | 0.167 | 3  | 6.3  | Q2 |
| IPI00440703; | GSTK1   | 29.8 | 4.08E-113 | 0.167 | 7  | 17.0 | Q2 |
| IPI00396015; | ACACA   | 15   | 2.09E-197 | 0.168 | 31 | 6.1  | Q2 |
| IPI00642238; | HP1BP3  | 14.8 | 3.73E-16  | 0.168 | 3  | 17.8 | Q2 |
| IPI00784366; | AP2B1   | 34.8 | 1.51E-300 | 0.168 | 28 | 15.9 | Q2 |
| IPI00293434; | SRP14   | 40.4 | 1.61E-67  | 0.169 | 8  | 3.8  | Q2 |
| IPI00444452; | MOV10   | 8.2  | 1.10E-40  | 0.169 | 8  | 18.3 | Q2 |
| IPI00010154; | GDI1    | 18.8 | 1.85E-284 | 0.170 | 2  | 6.0  | Q2 |
| IPI00549564; | ACSS2   | 5.3  | 1.10E-15  | 0.170 | 3  | 12.1 | Q2 |
| IPI00479877; | ALDH9A1 | 23.6 | 6.05E-121 | 0.170 | 5  | 14.8 | Q2 |
| IPI00163505; | RBM39   | 13.4 | 1.08E-70  | 0.170 | 3  | 7.3  | Q2 |
| IPI00002520; | SHMT2   | 32.7 | 5.43E-200 | 0.170 | 7  | 5.2  | Q2 |
| IPI00217952; | GFPT1   | 19.2 | 2.06E-118 | 0.172 | 9  | 10.7 | Q2 |
| IPI00477982; | RPS6KA1 | 13.4 | 3.44E-71  | 0.174 | 7  | 51.6 | Q2 |
| IPI00171844  | COPS4   | 20   | 4.88E-92  | 0.174 | 4  | 13.6 | Q2 |
| IPI00170752; | TNS4    | 11.2 | 8.83E-11  | 0.174 | 5  | 10.0 | Q2 |
| IPI00016621; | AP2A2   | 7.3  | 1.77E-177 | 0.175 | 5  | 18.6 | Q2 |
| IPI00000861; | LASP1   | 52.1 | 2.91E-72  | 0.176 | 6  | 19.1 | Q2 |
| IPI00005648; | SAFB2   | 6.3  | 1.37E-89  | 0.177 | 6  | 32.5 | Q2 |
| IPI00154645; | TBC1D15 | 2.7  | 1.28E-06  | 0.178 | 2  | 20.6 | Q2 |
| IPI00910701; | AARS    | 38.7 | <1.0E-304 | 0.178 | 32 | 7.0  | Q2 |
| IPI00024175; | PSMA7   | 44.8 | 1.40E-174 | 0.180 | 10 | 5.5  | Q2 |
| IPI00029557; | GRPEL1  | 42.4 | 9.92E-63  | 0.180 | 7  | 6.4  | Q2 |
| IPI00018146; | YWHAQ   | 48.2 | <1.0E-304 | 0.180 | 18 | 11.5 | Q2 |
| IPI00640818; | PNPLA6  | 3.1  | 2.06E-33  | 0.180 | 3  | 15.6 | Q2 |
| IPI00025874; | RPN1    | 37   | 1.22E-299 | 0.180 | 14 | 6.3  | Q2 |

|              |          |      |           |       |    |      |    |
|--------------|----------|------|-----------|-------|----|------|----|
| IPI00170935  | LRRC47   | 24.4 | 6.15E-63  | 0.181 | 9  | 7.8  | Q2 |
| IPI00029264  | CYC1     | 20   | 6.98E-50  | 0.182 | 5  | 4.4  | Q2 |
| IPI00220487; | ATP5H    | 78.3 | 5.66E-142 | 0.182 | 10 | 6.2  | Q2 |
| IPI00220219; | COPB2    | 34.3 | 7.53E-275 | 0.182 | 24 | 34.7 | Q2 |
| IPI00002569  | EIF4EBP1 | 25.4 | 4.89E-12  | 0.183 | 2  | 2.2  | Q2 |
| IPI00409635; | FAM62B   | 11.4 | 6.49E-87  | 0.183 | 8  | 11.9 | Q2 |
| IPI00018120; | DAP3     | 20.1 | 2.03E-87  | 0.183 | 2  | 2.9  | Q2 |
| IPI00001091  | AFG3L2   | 6.3  | 3.21E-14  | 0.184 | 4  | 53.9 | Q2 |
| IPI00022745; | MVD      | 20.8 | 1.56E-80  | 0.184 | 4  | 6.7  | Q2 |
| IPI00783982; | COPG     | 37.8 | <1.0E-304 | 0.184 | 39 | 43.6 | Q2 |
| IPI00021978; | PEX11B   | 12.7 | 1.12E-19  | 0.184 | 2  | 5.1  | Q2 |
| IPI00017412; | RFC2     | 13.8 | 6.42E-20  | 0.185 | 3  | 11.5 | Q2 |
| IPI00013122  | CDC37    | 33.9 | 3.37E-158 | 0.185 | 4  | 3.7  | Q2 |
| IPI00005154; | SSRP1    | 16.9 | 1.94E-67  | 0.185 | 7  | 3.7  | Q2 |
| IPI00003817; | ARHGDI1B | 27.9 | 5.11E-109 | 0.186 | 3  | 10.4 | Q2 |
| IPI00396131  | YTHDF3   | 7.8  | 5.36E-05  | 0.186 | 3  | 3.2  | Q2 |
| IPI00220362; | HSPE1    | 70.6 | 1.57E-71  | 0.186 | 3  | 0.2  | Q2 |
| IPI00465248; | ENO1     | 69.8 | <1.0E-304 | 0.187 | 39 | 46.6 | Q2 |
| IPI00007102; | C17orf25 | 26.8 | 4.83E-151 | 0.188 | 9  | 9.8  | Q2 |
| IPI00305092; | WIBG     | 31.9 | 2.00E-104 | 0.188 | 3  | 4.4  | Q2 |
| IPI00152890; | NOL6     | 11.7 | 4.52E-77  | 0.188 | 13 | 8.0  | Q2 |
| IPI00642369; | ELP2     | 3    | 2.86E-03  | 0.189 | 2  | 24.6 | Q2 |
| IPI00022542; | ROCK1    | 7    | 9.25E-34  | 0.189 | 9  | 14.4 | Q2 |
| IPI00871815; | LNPEP    | 18.8 | 5.17E-72  | 0.189 | 20 | 6.9  | Q2 |
| IPI00026970; | SUPT16H  | 23.8 | 1.21E-185 | 0.189 | 28 | 14.8 | Q2 |
| IPI00011916; | AIMP2    | 17.5 | 2.23E-87  | 0.191 | 5  | 12.3 | Q2 |
| IPI00007089  | TINP1    | 15.8 | 8.71E-10  | 0.191 | 3  | 10.4 | Q2 |
| IPI00748303; | ZFR      | 5.2  | 3.07E-20  | 0.191 | 5  | 68.0 | Q2 |
| IPI00006970  | MRPS2    | 13.2 | 1.40E-10  | 0.191 | 4  | 8.0  | Q2 |
| IPI00026833  | ADSS     | 21.3 | 5.74E-86  | 0.192 | 3  | 4.7  | Q2 |
| IPI00007909  | RABAC1   | 18.9 | 3.61E-20  | 0.193 | 3  | 15.3 | Q2 |
| IPI00828080; | ARAP1    | 3.7  | 7.18E-28  | 0.193 | 4  | 16.9 | Q2 |
| IPI00218448; | H2AFZ    | 41.4 | 1.37E-32  | 0.193 | 3  | 3.7  | Q2 |

|             |          |      |           |       |    |      |    |
|-------------|----------|------|-----------|-------|----|------|----|
| IPI00026328 | TXNDC12  | 26.2 | 2.78E-69  | 0.193 | 5  | 7.1  | Q2 |
| IPI00016703 | DHCR24   | 17.6 | 6.53E-47  | 0.193 | 2  | 7.7  | Q2 |
| IPI00046057 | STXBP1   | 3.2  | 2.14E-02  | 0.194 | 2  | 14.5 | Q2 |
| IPI00604777 | DPP9     | 12.1 | 3.56E-86  | 0.194 | 9  | 13.2 | Q2 |
| IPI00307259 | DNAJC13  | 3.7  | 3.27E-59  | 0.195 | 7  | 5.4  | Q2 |
| IPI00398272 | COL17A1  | 10   | 5.44E-61  | 0.195 | 13 | 14.1 | Q2 |
| IPI00004902 | ETFB     | 60   | 2.23E-116 | 0.195 | 7  | 5.0  | Q2 |
| IPI00171087 | SRBD1    | 3.2  | 6.63E-28  | 0.196 | 3  | 5.4  | Q2 |
| IPI00647185 | CEP170   | 0.9  | 4.70E-02  | 0.196 | 2  | 41.7 | Q2 |
| IPI00157757 | MICAL1   | 5.4  | 1.12E-24  | 0.197 | 5  | 6.4  | Q2 |
| IPI00922511 | F11R     | 35.6 | 8.32E-62  | 0.199 | 7  | 4.8  | Q2 |
| IPI00006092 | PMM2     | 46.7 | 5.34E-35  | 0.199 | 8  | 13.9 | Q2 |
| IPI00015018 | PPA1     | 80.6 | <1.0E-304 | 0.199 | 22 | 6.8  | Q2 |
| IPI00902991 | CSTF2    | 5.7  | 2.02E-25  | 0.199 | 3  | 15.1 | Q2 |
| IPI00009822 | SRP54    | 26   | 1.46E-178 | 0.199 | 5  | 7.5  | Q2 |
| IPI00410067 | ZC3HAV1  | 7.2  | 4.23E-51  | 0.199 | 5  | 34.1 | Q2 |
| IPI00103483 | COBRA1   | 3.4  | 1.75E-20  | 0.200 | 2  | 18.8 | Q2 |
| IPI00002894 | POLD1    | 14.6 | 6.47E-109 | 0.201 | 19 | 23.4 | Q2 |
| IPI00029133 | ATP5F1   | 44.1 | 1.50E-72  | 0.202 | 10 | 11.4 | Q2 |
| IPI00397904 | NUP93    | 31.3 | 4.32E-209 | 0.203 | 27 | 27.6 | Q2 |
| IPI00031522 | HADHA    | 32   | <1.0E-304 | 0.203 | 10 | 4.7  | Q2 |
| IPI00913912 | ATXN10   | 12.2 | 1.93E-21  | 0.203 | 5  | 5.4  | Q2 |
| IPI00020956 | HDGF     | 45   | 2.30E-90  | 0.204 | 6  | 16.4 | Q2 |
| IPI00291946 | USP10    | 14.8 | 6.64E-87  | 0.205 | 8  | 6.5  | Q2 |
| IPI00441473 | PRMT5    | 20.7 | 1.19E-111 | 0.205 | 5  | 2.7  | Q2 |
| IPI00016670 | C11orf59 | 46   | 1.08E-97  | 0.206 | 8  | 3.1  | Q2 |
| IPI00304577 | AP2A1    | 23.1 | 4.48E-218 | 0.206 | 24 | 12.1 | Q2 |
| IPI00328306 | ZC3H11A  | 4.3  | 4.44E-47  | 0.207 | 3  | 5.5  | Q2 |
| IPI00871932 | SPTBN1   | 34   | <1.0E-304 | 0.207 | 77 | 7.6  | Q2 |
| IPI00297579 | CBX3     | 39.3 | 1.33E-156 | 0.207 | 11 | 4.7  | Q2 |
| IPI00007052 | FIS1     | 34.2 | 2.68E-64  | 0.207 | 3  | 5.6  | Q2 |
| IPI00218733 | SOD1     | 59.1 | 9.66E-100 | 0.208 | 6  | 6.0  | Q2 |
| IPI00396171 | MAP4     | 42.9 | 3.87E-278 | 0.208 | 64 | 11.5 | Q2 |

|              |          |      |           |       |    |      |    |
|--------------|----------|------|-----------|-------|----|------|----|
| IPI00894340; | 40423    | 34.9 | 2.43E-192 | 0.208 | 3  | 7.4  | Q2 |
| IPI00013167; | MRPS25   | 17.3 | 1.72E-36  | 0.209 | 3  | 6.0  | Q2 |
| IPI00008034  | RAB23    | 10.5 | 1.47E-07  | 0.209 | 2  | 0.6  | Q2 |
| IPI00021129; | AP3B1    | 26.1 | 2.40E-128 | 0.210 | 32 | 23.9 | Q2 |
| IPI00220373; | IDE      | 11.7 | 2.89E-57  | 0.210 | 10 | 10.8 | Q2 |
| IPI00375144; | SRRT     | 11.5 | 2.11E-23  | 0.210 | 11 | 6.8  | Q2 |
| IPI00007611; | ATP5O    | 70   | 7.79E-273 | 0.210 | 16 | 5.5  | Q2 |
| IPI00026219  | CPSF1    | 5.8  | 3.84E-31  | 0.211 | 8  | 5.6  | Q2 |
| IPI00028635; | RPN2     | 20.2 | 2.37E-198 | 0.211 | 19 | 27.7 | Q2 |
| IPI00296830; | LUZP1    | 27.5 | 1.57E-147 | 0.211 | 24 | 24.7 | Q2 |
| IPI00169325  | WDR36    | 11.5 | 3.93E-76  | 0.211 | 10 | 5.8  | Q2 |
| IPI00001985; | VPS18    | 2.3  | 5.84E-22  | 0.212 | 2  | 0.8  | Q2 |
| IPI00658155; | MRPS34   | 18.7 | 7.15E-26  | 0.213 | 4  | 11.1 | Q2 |
| IPI00305068  | PRPF6    | 12.1 | 1.09E-69  | 0.214 | 11 | 18.1 | Q2 |
| IPI00170596  | SIN3A    | 2.1  | 2.90E-17  | 0.214 | 2  | 2.3  | Q2 |
| IPI00297084; | DDOST    | 28.7 | 1.40E-112 | 0.217 | 6  | 7.5  | Q2 |
| IPI00103525; | PSPC1    | 4.8  | 1.47E-30  | 0.217 | 2  | 1.9  | Q2 |
| IPI00411886; | NOC2L    | 8.5  | 2.11E-09  | 0.217 | 5  | 16.8 | Q2 |
| IPI00910977; | MPST     | 36   | 1.51E-144 | 0.217 | 5  | 39.8 | Q2 |
| IPI00014587; | CLTA     | 22.2 | 6.66E-79  | 0.217 | 4  | 8.1  | Q2 |
| IPI00644674; | NUBP2    | 23.6 | 6.33E-22  | 0.217 | 4  | 11.3 | Q2 |
| IPI00747810; | FSCN1    | 55.2 | <1.0E-304 | 0.217 | 21 | 8.2  | Q2 |
| IPI00645431; | BAT3     | 15   | 2.98E-99  | 0.218 | 16 | 63.4 | Q2 |
| IPI00923606; | EPRS     | 29   | <1.0E-304 | 0.218 | 57 | 7.1  | Q2 |
| IPI00217686  | FTSJ3    | 13.9 | 4.06E-139 | 0.218 | 9  | 26.9 | Q2 |
| IPI00101186; | RRP12    | 17.5 | 2.43E-79  | 0.218 | 25 | 10.3 | Q2 |
| IPI00412987; | GMFB     | 34.4 | 5.58E-73  | 0.219 | 6  | 7.2  | Q2 |
| IPI00855787; | TNKS1BP1 | 23.5 | <1.0E-304 | 0.219 | 34 | 10.8 | Q2 |
| IPI00013468; | BUB3     | 24.7 | 3.56E-34  | 0.219 | 3  | 8.9  | Q2 |
| IPI00011268; | RALY     | 34.2 | 3.29E-49  | 0.221 | 5  | 13.0 | Q2 |
| IPI00028980; | URB2     | 3.5  | 3.38E-26  | 0.221 | 5  | 16.0 | Q2 |
| IPI00465431  | LGALS3   | 33.6 | 2.92E-74  | 0.221 | 13 | 6.9  | Q2 |
| IPI00855940; | XPO7     | 15.7 | 2.63E-125 | 0.221 | 18 | 9.7  | Q2 |

|              |          |      |           |       |    |       |    |
|--------------|----------|------|-----------|-------|----|-------|----|
| IPI00026546; | PAFAH1B2 | 27.1 | 3.38E-188 | 0.221 | 5  | 44.5  | Q2 |
| IPI00013862; | DTYMK    | 63.2 | 1.96E-59  | 0.222 | 12 | 9.0   | Q2 |
| IPI00644775; | EXOSC5   | 9.7  | 6.04E-22  | 0.222 | 2  | 10.7  | Q2 |
| IPI00184477; | GPHN     | 6.5  | 1.28E-67  | 0.223 | 4  | 8.3   | Q2 |
| IPI00297492; | STT3A    | 9.4  | 1.15E-24  | 0.224 | 12 | 17.5  | Q2 |
| IPI00394679; | WHSC2    | 4.5  | 1.73E-36  | 0.225 | 2  | 5.8   | Q2 |
| IPI00007024  | FAM96B   | 30.1 | 3.30E-05  | 0.225 | 3  | 0.8   | Q2 |
| IPI00844237; | BAT2     | 2.2  | 1.17E-08  | 0.226 | 3  | 2.4   | Q2 |
| IPI00024664; | USP5     | 20.2 | 2.43E-105 | 0.226 | 16 | 8.8   | Q2 |
| IPI00152695; | WDR82    | 20.4 | 2.13E-143 | 0.227 | 6  | 29.6  | Q2 |
| IPI00017726; | HSD17B10 | 73.6 | <1.0E-304 | 0.227 | 19 | 7.0   | Q2 |
| IPI00796366; | MYL6     | 45   | 1.30E-182 | 0.227 | 5  | 2.6   | Q2 |
| IPI00796919; | GLB1     | 5    | 7.35E-10  | 0.228 | 3  | 31.6  | Q2 |
| IPI00879004; | TOP2A    | 14   | 1.41E-183 | 0.229 | 27 | 21.6  | Q2 |
| IPI00873899; | ABCF1    | 13.1 | 1.92E-130 | 0.230 | 10 | 4.4   | Q2 |
| IPI00647217; | SKIV2L2  | 22.1 | 4.53E-172 | 0.231 | 22 | 10.5  | Q2 |
| IPI00219861; | ACP1     | 38.6 | 3.71E-91  | 0.231 | 6  | 6.9   | Q2 |
| IPI00021187; | RUVBL1   | 48.2 | 2.74E-293 | 0.231 | 4  | 2.0   | Q2 |
| IPI00027705  | PRIM2    | 5.9  | 4.30E-17  | 0.232 | 3  | 17.9  | Q2 |
| IPI00010402; | SH3BGRL3 | 14.6 | 8.98E-34  | 0.232 | 4  | 45.7  | Q2 |
| IPI00921844; | BUB1B    | 1.9  | 9.78E-12  | 0.233 | 2  | 2.3   | Q2 |
| IPI00887678; | PPIA     | 52.9 | <1.0E-304 | 0.233 | 45 | 10.6  | Q2 |
| IPI00217277; | SLC25A10 | 18.2 | 1.69E-55  | 0.234 | 3  | 0.2   | Q2 |
| IPI00007750; | TUBA4A   | 15   | <1.0E-304 | 0.234 | 6  | 17.5  | Q2 |
| IPI00429191  | ETF1     | 30.2 | 2.51E-92  | 0.234 | 7  | 7.9   | Q2 |
| IPI00024157  | FKBP3    | 39.3 | 7.53E-93  | 0.235 | 6  | 4.5   | Q2 |
| IPI00032823; | EXOSC1   | 40   | 3.61E-94  | 0.235 | 6  | 10.0  | Q2 |
| IPI00216008; | G6PD     | 41.7 | 1.60E-144 | 0.235 | 15 | 157.3 | Q2 |
| IPI00304692; | RBMX     | 33.5 | 2.16E-103 | 0.235 | 8  | 25.1  | Q2 |
| IPI00604647; | MAP4K4   | 7.3  | 6.40E-31  | 0.236 | 9  | 5.7   | Q2 |
| IPI00023504; | RAB3A    | 11.8 | 8.62E-63  | 0.236 | 3  | 14.4  | Q2 |
| IPI00554788; | KRT18    | 72.3 | <1.0E-304 | 0.236 | 65 | 224.2 | Q2 |
| IPI00302605; | SLC30A7  | 12.5 | 2.25E-26  | 0.236 | 2  | 7.0   | Q2 |

|              |          |      |           |       |    |      |    |
|--------------|----------|------|-----------|-------|----|------|----|
| IPI00294158; | BLVRA    | 40.5 | 2.17E-80  | 0.237 | 4  | 2.5  | Q2 |
| IPI00384028; | PAPOLA   | 9.7  | 5.63E-33  | 0.238 | 6  | 5.9  | Q2 |
| IPI00337315; | RBBP6    | 2.8  | 2.61E-07  | 0.238 | 3  | 4.4  | Q2 |
| IPI00007426; | ARL6IP5  | 24.5 | 4.59E-12  | 0.239 | 5  | 6.4  | Q2 |
| IPI00011996; | UBE2Z    | 7.6  | 1.44E-03  | 0.239 | 2  | 4.5  | Q2 |
| IPI00020928; | TFAM     | 22.4 | 2.65E-28  | 0.239 | 5  | 25.1 | Q2 |
| IPI00010136; | CTBP2    | 7.9  | 4.32E-30  | 0.240 | 4  | 25.9 | Q2 |
| IPI00384265; | FAM120A  | 26.5 | 7.96E-212 | 0.240 | 23 | 7.4  | Q2 |
| IPI00006552; | CNOT7    | 11.9 | 4.59E-17  | 0.240 | 3  | 6.2  | Q2 |
| IPI00289819; | IGF2R    | 8.8  | 7.62E-102 | 0.240 | 21 | 45.9 | Q2 |
| IPI00156689; | VAT1     | 26.2 | 3.04E-169 | 0.240 | 7  | 8.3  | Q2 |
| IPI00000690; | AIFM1    | 17.3 | 5.09E-29  | 0.240 | 6  | 9.8  | Q2 |
| IPI00022793; | HADHB    | 28.5 | 6.97E-86  | 0.241 | 6  | 4.9  | Q2 |
| IPI00375358; | RFC1     | 3.4  | 7.74E-53  | 0.242 | 4  | 8.5  | Q2 |
| IPI00744015; | DYNC112  | 9.2  | 1.91E-57  | 0.242 | 4  | 7.6  | Q2 |
| IPI00927606; | GPX1     | 73.9 | 5.74E-175 | 0.242 | 12 | 3.7  | Q2 |
| IPI00001632; | KIAA1522 | 1.7  | 7.53E-05  | 0.243 | 2  | 7.4  | Q2 |
| IPI00009747; | LSS      | 15   | 1.01E-60  | 0.244 | 9  | 4.4  | Q2 |
| IPI00014376; | RAB31    | 23.1 | 4.58E-25  | 0.245 | 3  | 6.3  | Q2 |
| IPI00479905; | NDUFB10  | 51.2 | 1.30E-45  | 0.245 | 6  | 15.6 | Q2 |
| IPI00929344; | PFAS     | 12.3 | 4.13E-121 | 0.245 | 15 | 13.5 | Q2 |
| IPI00018813; | COPS2    | 29.1 | 1.86E-77  | 0.246 | 3  | 7.1  | Q2 |
| IPI00872209; | PPP3CA   | 18.6 | 1.44E-64  | 0.246 | 4  | 32.8 | Q2 |
| IPI00059279; | EXOC4    | 4.9  | 1.47E-26  | 0.247 | 2  | 4.8  | Q2 |
| IPI00032881  | MRPS23   | 31.1 | 3.71E-24  | 0.248 | 5  | 8.0  | Q2 |
| IPI00220766  | GLO1     | 61.4 | 7.74E-107 | 0.248 | 13 | 5.4  | Q2 |
| IPI00291419  | ACAT2    | 38   | 2.31E-264 | 0.250 | 4  | 4.8  | Q2 |
| IPI00032498; | DCTN5    | 20.9 | 3.19E-24  | 0.251 | 3  | 7.4  | Q2 |
| IPI00218288; | SEC24D   | 4.1  | 4.75E-15  | 0.251 | 2  | 10.0 | Q2 |
| IPI00009104; | RUVBL2   | 43.2 | 3.26E-274 | 0.251 | 9  | 11.9 | Q2 |
| IPI00010896; | CLIC1    | 79.3 | <1.0E-304 | 0.251 | 26 | 5.7  | Q2 |
| IPI00002506; | ALG5     | 16.4 | 1.83E-14  | 0.251 | 4  | 9.2  | Q2 |
| IPI00030255; | PLOD3    | 6.2  | 3.40E-17  | 0.252 | 4  | 27.9 | Q2 |



|              |               |      |           |       |     |       |    |
|--------------|---------------|------|-----------|-------|-----|-------|----|
| IPI00027443; | DKFZp686F1612 | 13.6 | 7.83E-46  | 0.253 | 12  | 8.2   | Q2 |
| IPI00178440; | EEF1B2        | 26.2 | 1.15E-136 | 0.254 | 7   | 5.5   | Q2 |
| IPI00477040; | NUP188        | 4.5  | 1.71E-12  | 0.254 | 7   | 8.0   | Q2 |
| IPI00007926; | RCL           | 30.5 | 1.04E-36  | 0.255 | 2   | 21.6  | Q2 |
| IPI00025721; | COPS3         | 18.7 | 1.61E-32  | 0.255 | 2   | 2.3   | Q2 |
| IPI00300504; | UPF2          | 6    | 1.07E-48  | 0.255 | 7   | 4.0   | Q2 |
| IPI00438170; | SNX12         | 34.3 | 3.37E-37  | 0.256 | 7   | 7.6   | Q2 |
| IPI00034277; | ATP13A1       | 3.9  | 5.20E-15  | 0.256 | 4   | 20.7  | Q2 |
| IPI00216293; | TST           | 12.8 | 2.05E-22  | 0.257 | 2   | 8.8   | Q2 |
| IPI00554648; | KRT8          | 59.6 | <1.0E-304 | 0.257 | 37  | 159.5 | Q2 |
| IPI00061525; | GNPNAT1       | 45.7 | 1.98E-166 | 0.259 | 9   | 14.3  | Q2 |
| IPI00017376; | SEC23B        | 13.8 | 6.08E-105 | 0.259 | 5   | 8.2   | Q2 |
| IPI00300078; | PWP2          | 5.4  | 2.08E-44  | 0.260 | 7   | 6.1   | Q2 |
| IPI00411680; | PCMT1         | 52.6 | 4.68E-220 | 0.261 | 15  | 24.0  | Q2 |
| IPI00477468  | CTR9          | 5.3  | 1.24E-25  | 0.262 | 7   | 9.2   | Q2 |
| IPI00926903; | CHCHD3        | 33.6 | 2.22E-87  | 0.263 | 6   | 30.6  | Q2 |
| IPI00012535; | DNAJA1        | 25.9 | 2.37E-49  | 0.264 | 3   | 10.4  | Q2 |
| IPI00414554  | ARPC5L        | 34.6 | 2.85E-45  | 0.264 | 5   | 1.1   | Q2 |
| IPI00333215; | TCEA1         | 28.6 | 1.61E-36  | 0.264 | 2   | 15.1  | Q2 |
| IPI00008167; | ATP1B3        | 30.8 | 1.01E-87  | 0.265 | 6   | 102.4 | Q2 |
| IPI00856045; | AHNAK2        | 48.5 | <1.0E-304 | 0.266 | 272 | 72.0  | Q2 |
| IPI00412157; | PPME1         | 6.6  | 6.29E-15  | 0.266 | 3   | 4.7   | Q2 |
| IPI00014624  | AP3S1         | 18.1 | 1.22E-69  | 0.267 | 6   | 2.0   | Q2 |
| IPI00015361; | PFDN5         | 59.1 | 1.44E-144 | 0.267 | 12  | 7.8   | Q2 |
| IPI00885108; | PATL1         | 6.1  | 3.06E-19  | 0.268 | 3   | 10.0  | Q2 |
| IPI00304925; | HSPA1A        | 44.1 | <1.0E-304 | 0.268 | 11  | 4.4   | Q2 |
| IPI00903105; | CIAPIN1       | 22.1 | 1.15E-47  | 0.269 | 2   | 6.5   | Q2 |
| IPI00021700  | PCNA          | 64.4 | 6.15E-261 | 0.270 | 19  | 8.8   | Q2 |
| IPI00003923; | UMPS          | 26.7 | 5.77E-112 | 0.271 | 3   | 6.9   | Q2 |
| IPI00014589; | CLTB          | 31.4 | 7.32E-16  | 0.271 | 7   | 10.6  | Q2 |
| IPI00002188; | ARFGEF1       | 1.6  | 1.80E-60  | 0.271 | 3   | 5.2   | Q2 |
| IPI00215919; | ARF5          | 30   | 3.83E-127 | 0.272 | 5   | 3.6   | Q2 |
| IPI00215998; | CD63          | 12.6 | 2.72E-08  | 0.272 | 2   | 5.2   | Q2 |

|             |          |      |           |       |     |       |    |
|-------------|----------|------|-----------|-------|-----|-------|----|
| IPI00003438 | DNAJC8   | 20.2 | 1.60E-10  | 0.273 | 3   | 2.4   | Q2 |
| IPI00219678 | EIF2S1   | 58.7 | 1.19E-190 | 0.273 | 8   | 3.8   | Q2 |
| IPI00306290 | XPOT     | 11   | 5.28E-114 | 0.273 | 11  | 9.4   | Q2 |
| IPI00830108 | DNAJC2   | 3.1  | 9.11E-13  | 0.273 | 2   | 12.8  | Q2 |
| IPI00008418 | DIABLO   | 16.5 | 4.62E-27  | 0.274 | 4   | 6.2   | Q2 |
| IPI00015178 | ARFRP1   | 13.9 | 2.10E-15  | 0.274 | 2   | 4.7   | Q2 |
| IPI00550523 | ATL3     | 22.7 | 7.30E-173 | 0.274 | 5   | 6.2   | Q2 |
| IPI00299468 | SCD      | 10.3 | 2.43E-26  | 0.274 | 4   | 6.1   | Q2 |
| IPI00015029 | PTGES3   | 36.9 | 2.13E-94  | 0.274 | 8   | 6.5   | Q2 |
| IPI00414676 | HSP90AB1 | 63.8 | <1.0E-304 | 0.275 | 121 | 22.8  | Q2 |
| IPI00030363 | ACAT1    | 29   | 2.62E-182 | 0.275 | 5   | 4.8   | Q2 |
| IPI00384051 | PSME2    | 54.2 | 5.24E-104 | 0.275 | 12  | 4.7   | Q2 |
| IPI00789740 | GEMIN4   | 5.4  | 2.80E-09  | 0.276 | 5   | 4.7   | Q2 |
| IPI00333067 | HERC4    | 5.7  | 5.10E-25  | 0.276 | 5   | 10.9  | Q2 |
| IPI00107745 | CROP     | 11.6 | 3.16E-66  | 0.277 | 2   | 0.9   | Q2 |
| IPI00032849 | NOP16    | 28.7 | 2.08E-21  | 0.277 | 4   | 1.9   | Q2 |
| IPI00796333 | ALDOA    | 66.5 | <1.0E-304 | 0.278 | 26  | 97.6  | Q2 |
| IPI00020446 | CD82     | 9    | 4.97E-13  | 0.278 | 2   | 111.0 | Q2 |
| IPI00046828 | CCDC58   | 27.8 | 1.67E-23  | 0.279 | 2   | 0.5   | Q2 |
| IPI00015911 | DLD      | 24.2 | 1.43E-285 | 0.280 | 4   | 8.0   | Q2 |
| IPI00418262 | ALDOC    | 14.4 | 1.02E-276 | 0.281 | 4   | 3.8   | Q2 |
| IPI00414410 | MRPL22   | 25.2 | 1.93E-33  | 0.281 | 4   | 10.4  | Q2 |
| IPI00009148 | NUDT3    | 18   | 1.69E-07  | 0.282 | 2   | 3.7   | Q2 |
| IPI00102313 | SRA1     | 17.7 | 1.62E-11  | 0.282 | 4   | 28.6  | Q2 |
| IPI00470610 | PYCR2    | 34.1 | 1.05E-73  | 0.282 | 7   | 11.3  | Q2 |
| IPI00157176 | MEA1     | 16.2 | 1.97E-31  | 0.282 | 2   | 12.0  | Q2 |
| IPI00024719 | HAT1     | 11.2 | 1.08E-111 | 0.282 | 3   | 5.5   | Q2 |
| IPI00177437 | CRNKL1   | 3.4  | 6.57E-07  | 0.282 | 2   | 11.3  | Q2 |
| IPI00154975 | DNAJC9   | 37.3 | 3.02E-52  | 0.282 | 8   | 22.5  | Q2 |
| IPI00006482 | ATP1A1   | 34.3 | <1.0E-304 | 0.283 | 47  | 12.6  | Q2 |
| IPI00220158 | ADD1     | 6    | 9.67E-62  | 0.284 | 3   | 10.0  | Q2 |
| IPI00019269 | WDR61    | 18.7 | 8.51E-37  | 0.284 | 4   | 2.7   | Q2 |
| IPI00873758 | PIK3C3   | 6.8  | 6.83E-12  | 0.284 | 5   | 8.8   | Q2 |

|              |                |      |           |       |     |       |    |
|--------------|----------------|------|-----------|-------|-----|-------|----|
| IPI00219306; | MAGOH          | 5.5  | 8.77E-25  | 0.286 | 2   | 0.2   | Q2 |
| IPI00644297; | SKI2W          | 10.4 | 2.15E-39  | 0.287 | 11  | 14.5  | Q2 |
| IPI00027107  | TUFM           | 59.8 | 8.92E-287 | 0.287 | 15  | 10.1  | Q2 |
| IPI00025176  | SMNDC1         | 9.2  | 1.25E-08  | 0.288 | 2   | 10.4  | Q2 |
| IPI00029159; | MRE11A         | 6.8  | 4.97E-28  | 0.289 | 4   | 28.5  | Q2 |
| IPI00218493; | HPRT1          | 49.5 | 1.58E-129 | 0.289 | 13  | 6.2   | Q2 |
| IPI00298961; | XPO1           | 37   | <1.0E-304 | 0.290 | 34  | 7.1   | Q2 |
| IPI00386271; | SLC25A12       | 7.1  | 5.34E-105 | 0.290 | 3   | 18.0  | Q2 |
| IPI00815770; | SNX3           | 46.3 | 1.82E-27  | 0.291 | 7   | 3.3   | Q2 |
| IPI00329563; | UBE2L6         | 19.6 | 3.65E-06  | 0.292 | 2   | 8.2   | Q2 |
| IPI00549205; | RAD50          | 18.8 | 2.95E-101 | 0.292 | 24  | 11.9  | Q2 |
| IPI00413451; | DKFZp686I04222 | 37.4 | 2.37E-109 | 0.293 | 4   | 10.5  | Q2 |
| IPI00847322; | SOD2           | 27   | 3.27E-17  | 0.293 | 3   | 140.1 | Q2 |
| IPI00293350; | TSNAX          | 33.4 | 2.93E-69  | 0.294 | 5   | 5.8   | Q2 |
| IPI00219385; | NDUFB6         | 19.5 | 5.97E-24  | 0.295 | 2   | 1.2   | Q2 |
| IPI00016346; | PROSC          | 32.7 | 1.31E-84  | 0.297 | 5   | 10.8  | Q2 |
| IPI00301364; | SKP1           | 44.2 | 4.25E-65  | 0.298 | 8   | 9.3   | Q2 |
| IPI00377261; | FUBP3          | 12.8 | 1.88E-34  | 0.298 | 6   | 3.6   | Q2 |
| IPI00013949; | SGTA           | 32.9 | 5.65E-90  | 0.299 | 7   | 35.0  | Q2 |
| IPI00220301; | PRDX6          | 63.8 | 3.41E-297 | 0.301 | 33  | 10.5  | Q2 |
| IPI00004497; | BCR            | 4.2  | 5.74E-46  | 0.301 | 4   | 9.4   | Q2 |
| IPI00012575  | PIR            | 4.1  | 7.39E-14  | 0.303 | 2   | 16.9  | Q2 |
| IPI00220271; | AKR1A1         | 58.5 | 6.07E-241 | 0.303 | 6   | 2.8   | Q2 |
| IPI00376317; | EDC4           | 8    | 9.71E-74  | 0.304 | 10  | 12.9  | Q2 |
| IPI00296337; | PRKDC          | 34.3 | <1.0E-304 | 0.304 | 180 | 10.1  | Q2 |
| IPI00241860  | MIPEP          | 2.9  | 6.21E-04  | 0.304 | 2   | 9.0   | Q2 |
| IPI00645078; | UBA1           | 43.3 | <1.0E-304 | 0.304 | 65  | 60.0  | Q2 |
| IPI00026625; | NUP155         | 18.5 | 1.32E-273 | 0.305 | 26  | 5.4   | Q2 |
| IPI00646304; | PPIB           | 58.8 | 7.04E-175 | 0.306 | 26  | 58.9  | Q2 |
| IPI00072377; | SET            | 32.8 | 1.25E-114 | 0.306 | 6   | 4.5   | Q2 |
| IPI00218922; | SEC63          | 9.7  | 1.46E-23  | 0.307 | 6   | 19.2  | Q2 |
| IPI00925656; | MRPS17         | 25.8 | 2.42E-25  | 0.308 | 3   | 5.5   | Q2 |
| IPI00008569; | YKT6           | 53.5 | 1.05E-111 | 0.308 | 9   | 6.2   | Q2 |

|              |               |      |           |       |     |      |    |
|--------------|---------------|------|-----------|-------|-----|------|----|
| IPI00746777; | ADH5          | 35.6 | 4.96E-212 | 0.309 | 6   | 23.0 | Q2 |
| IPI00008164  | PREP          | 28.5 | <1.0E-304 | 0.310 | 9   | 9.0  | Q2 |
| IPI00064212  | ZNF828        | 2.1  | 2.58E-03  | 0.311 | 2   | 14.4 | Q2 |
| IPI00844214; | CTNBL1        | 9.9  | 1.93E-14  | 0.312 | 6   | 12.8 | Q2 |
| IPI00789551; | MATR3         | 28.3 | 6.40E-196 | 0.312 | 37  | 10.5 | Q2 |
| IPI00815732  | DKFZp781N1372 | 45.1 | 3.53E-150 | 0.314 | 4   | 7.0  | Q2 |
| IPI00217261; | TEX2          | 1.6  | 2.12E-06  | 0.314 | 2   | 3.9  | Q2 |
| IPI00456969; | DYNC1H1       | 45.2 | <1.0E-304 | 0.314 | 374 | 13.1 | Q2 |
| IPI00012442; | G3BP1         | 39.7 | 3.23E-263 | 0.315 | 11  | 13.6 | Q2 |
| IPI00010157; | MAT2A         | 32.9 | 7.63E-205 | 0.315 | 2   | 8.1  | Q2 |
| IPI00398009; | IPO4          | 10.4 | 3.85E-70  | 0.315 | 11  | 13.2 | Q2 |
| IPI00301579  | NPC2          | 36.8 | 7.98E-78  | 0.316 | 11  | 17.8 | Q2 |
| IPI00024364; | TNPO1         | 22.4 | 9.56E-177 | 0.316 | 16  | 10.4 | Q2 |
| IPI00141318; | CKAP4         | 44.2 | 2.19E-262 | 0.316 | 16  | 14.8 | Q2 |
| IPI00376344; | MYO1B         | 39.3 | <1.0E-304 | 0.316 | 54  | 6.9  | Q2 |
| IPI00795922; | MRPS28        | 20.8 | 1.04E-09  | 0.317 | 3   | 4.1  | Q2 |
| IPI00411706; | ESD           | 41.8 | 1.06E-147 | 0.317 | 9   | 25.0 | Q2 |
| IPI00031564; | GGCT          | 43.1 | 3.05E-79  | 0.318 | 7   | 11.4 | Q2 |
| IPI00550308; | RBM12         | 8.9  | 2.06E-49  | 0.318 | 6   | 5.7  | Q2 |
| IPI00872668; | NIT2          | 36.7 | 2.68E-154 | 0.320 | 11  | 5.1  | Q2 |
| IPI00304409  | CARHSP1       | 25.9 | 3.92E-48  | 0.321 | 3   | 5.9  | Q2 |
| IPI00042580; | APOO          | 14.1 | 2.45E-16  | 0.323 | 3   | 12.5 | Q2 |
| IPI00027014; | DCTN3         | 36   | 1.15E-17  | 0.324 | 8   | 84.0 | Q2 |
| IPI00010105; | EIF6          | 60   | 2.18E-295 | 0.324 | 16  | 3.5  | Q2 |
| IPI00413961; | DKFZp666O0110 | 5.4  | 4.07E-15  | 0.325 | 7   | 10.5 | Q2 |
| IPI00021570; | EDF1          | 35.1 | 1.81E-35  | 0.326 | 3   | 5.5  | Q2 |
| IPI00014361; | TSTA3         | 25.2 | 8.48E-30  | 0.326 | 2   | 5.5  | Q2 |
| IPI00644127; | IARS          | 39   | <1.0E-304 | 0.327 | 57  | 7.9  | Q2 |
| IPI00006606  | MRPS26        | 28.3 | 2.59E-21  | 0.328 | 2   | 8.1  | Q2 |
| IPI00003925; | PDHB          | 42.9 | 1.50E-242 | 0.328 | 7   | 14.5 | Q2 |
| IPI00026689; | CDC2          | 58.7 | 4.14E-152 | 0.328 | 17  | 6.8  | Q2 |
| IPI00025277  | PDCD6         | 44   | 5.53E-47  | 0.329 | 8   | 3.4  | Q2 |
| IPI00001639; | KPNB1         | 39.2 | <1.0E-304 | 0.330 | 55  | 16.0 | Q2 |

|              |                |      |           |       |    |      |    |
|--------------|----------------|------|-----------|-------|----|------|----|
| IPI00168262; | GLT25D1        | 8.4  | 9.21E-09  | 0.331 | 7  | 17.6 | Q2 |
| IPI00646323; | C10orf76       | 3.8  | 6.36E-15  | 0.331 | 2  | 44.9 | Q2 |
| IPI00217442; | hCG_2045902    | 3.3  | 5.40E-171 | 0.331 | 6  | 29.5 | Q2 |
| IPI00384857; | HN1            | 31.5 | 1.49E-87  | 0.333 | 7  | 12.7 | Q2 |
| IPI00015808  | GNL2           | 10.5 | 7.56E-15  | 0.333 | 6  | 11.2 | Q2 |
| IPI00845348; | DKFZp686N09117 | 6.2  | 6.07E-06  | 0.334 | 2  | 17.2 | Q2 |
| IPI00552897; | MDC1           | 1.8  | 8.77E-03  | 0.334 | 2  | 0.0  | Q2 |
| IPI00871176; | NIPSNAP3A      | 19.1 | 2.46E-44  | 0.335 | 2  | 8.4  | Q2 |
| IPI00400922; | PDCD11         | 15.5 | 4.71E-157 | 0.335 | 27 | 12.6 | Q2 |
| IPI00014454; | RIN1           | 4.3  | 1.23E-19  | 0.337 | 2  | 5.7  | Q2 |
| IPI00302647; | CC2D1A         | 6.2  | 4.42E-36  | 0.338 | 6  | 11.5 | Q2 |
| IPI00413611; | TOP1           | 25.2 | 1.32E-82  | 0.338 | 21 | 7.9  | Q2 |
| IPI00294834; | ASPH           | 13.3 | 5.33E-243 | 0.338 | 4  | 22.5 | Q2 |
| IPI00305833  | SMU1           | 7    | 6.23E-13  | 0.338 | 2  | 0.7  | Q2 |
| IPI00007321; | LYPLA1         | 17.5 | 3.42E-49  | 0.339 | 5  | 4.5  | Q2 |
| IPI00002255; | LRBA           | 5.9  | 2.06E-117 | 0.340 | 18 | 14.2 | Q2 |
| IPI00791325; | KIAA0020       | 9.2  | 2.97E-25  | 0.340 | 5  | 4.9  | Q2 |
| IPI00140420; | SND1           | 51.1 | <1.0E-304 | 0.341 | 46 | 8.1  | Q2 |
| IPI00000874; | PRDX1          | 79.9 | 7.07E-180 | 0.341 | 29 | 11.2 | Q2 |
| IPI00027898; | C21orf70       | 13.5 | 3.81E-36  | 0.341 | 2  | 27.0 | Q2 |
| IPI00019912; | HSD17B4        | 20.1 | 1.15E-109 | 0.342 | 15 | 23.5 | Q2 |
| IPI00219677; | DERA           | 22.3 | 7.44E-24  | 0.342 | 4  | 15.6 | Q2 |
| IPI00149849; | COG4           | 1.9  | 1.68E-02  | 0.343 | 2  | 50.5 | Q2 |
| IPI00008982; | ALDH18A1       | 18.1 | 3.27E-82  | 0.344 | 9  | 10.0 | Q2 |
| IPI00017469; | SPR            | 33.7 | 4.26E-152 | 0.344 | 6  | 9.6  | Q2 |
| IPI00000041; | RHOB           | 9.2  | 3.42E-114 | 0.345 | 2  | 87.5 | Q2 |
| IPI00877662; | RAB13          | 12.5 | 2.79E-56  | 0.346 | 4  | 5.4  | Q2 |
| IPI00030847; | TM9SF3         | 4.9  | 2.84E-09  | 0.347 | 3  | 9.3  | Q2 |
| IPI00106567  | WDR33          | 1.9  | 2.47E-04  | 0.347 | 2  | 14.2 | Q2 |
| IPI00007346; | PPIH           | 34.5 | 4.34E-31  | 0.347 | 6  | 3.4  | Q2 |
| IPI00012585  | HEXB           | 29.5 | 1.27E-75  | 0.347 | 10 | 24.9 | Q2 |
| IPI00328170; | MOGS           | 17.4 | 1.36E-81  | 0.347 | 12 | 24.8 | Q2 |
| IPI00291930; | CLINT1         | 5.4  | 6.40E-22  | 0.349 | 3  | 2.5  | Q2 |

|              |          |      |           |       |    |      |    |
|--------------|----------|------|-----------|-------|----|------|----|
| IPI00306301; | PDHA1    | 21.3 | 1.05E-32  | 0.349 | 6  | 13.1 | Q2 |
| IPI00257508; | DPYSL2   | 26.6 | 6.22E-173 | 0.350 | 4  | 12.9 | Q2 |
| IPI00793375; | XPNPEP1  | 12   | 4.96E-64  | 0.351 | 6  | 7.1  | Q2 |
| IPI00790530; | NUP85    | 2.3  | 5.91E-19  | 0.353 | 2  | 12.1 | Q2 |
| IPI00017381; | RFC4     | 15.2 | 5.39E-21  | 0.354 | 2  | 13.9 | Q2 |
| IPI00479722; | PSME1    | 49   | 4.98E-264 | 0.358 | 13 | 10.2 | Q2 |
| IPI00289499; | ATIC     | 52   | <1.0E-304 | 0.358 | 23 | 13.9 | Q2 |
| IPI00743284; | MTR      | 7    | 1.34E-48  | 0.359 | 8  | 8.5  | Q2 |
| IPI00030782; | STAT6    | 6.3  | 2.17E-39  | 0.359 | 6  | 5.9  | Q2 |
| IPI00010200  | YTHDC2   | 8.1  | 2.95E-50  | 0.360 | 10 | 6.8  | Q2 |
| IPI00102815; | NOC3L    | 6.9  | 1.14E-33  | 0.361 | 5  | 8.8  | Q2 |
| IPI00604664; | NDUFS1   | 8.9  | 2.25E-142 | 0.361 | 3  | 10.4 | Q2 |
| IPI00031397; | ACSL3    | 20.4 | 1.76E-214 | 0.362 | 9  | 68.5 | Q2 |
| IPI00549389; | METTL11A | 22.8 | 4.29E-48  | 0.363 | 5  | 5.9  | Q2 |
| IPI00221222; | SUB1     | 42.5 | 3.56E-37  | 0.363 | 7  | 9.5  | Q2 |
| IPI00329791  | DDX46    | 17.6 | 2.03E-110 | 0.363 | 19 | 7.6  | Q2 |
| IPI00009960; | IMMT     | 27.6 | 6.64E-247 | 0.363 | 19 | 13.7 | Q2 |
| IPI00640525; | PPGB     | 9    | 3.48E-53  | 0.364 | 3  | 3.3  | Q2 |
| IPI00003004; | SLC25A22 | 11.5 | 9.56E-13  | 0.364 | 3  | 10.2 | Q2 |
| IPI00419869; | COX15    | 5.6  | 1.24E-21  | 0.365 | 2  | 11.2 | Q2 |
| IPI00013146; | MRPS22   | 31.7 | 5.64E-59  | 0.367 | 3  | 6.1  | Q2 |
| IPI00016868  | TELO2    | 4.4  | 4.32E-06  | 0.367 | 3  | 91.7 | Q2 |
| IPI00304742  | STK10    | 9    | 7.29E-39  | 0.368 | 9  | 6.4  | Q2 |
| IPI00903255; | OSTF1    | 43   | 4.87E-120 | 0.371 | 8  | 12.8 | Q2 |
| IPI00004860; | RARS     | 47   | <1.0E-304 | 0.372 | 23 | 23.6 | Q2 |
| IPI00383670; | TPD52L1  | 11.8 | 4.96E-41  | 0.373 | 2  | 22.3 | Q2 |
| IPI00646377; | EIF4G3   | 1.2  | 3.07E-14  | 0.373 | 2  | 4.8  | Q2 |
| IPI00016613; | CSNK2A1  | 34.3 | 2.03E-95  | 0.375 | 4  | 4.1  | Q2 |
| IPI00401264  | ERP44    | 30   | 1.25E-62  | 0.376 | 9  | 12.4 | Q2 |
| IPI00216308; | VDAC1    | 71.7 | <1.0E-304 | 0.380 | 20 | 9.3  | Q2 |
| IPI00219077; | LTA4H    | 44.7 | <1.0E-304 | 0.382 | 16 | 8.1  | Q2 |
| IPI00513761; | RP3      | 28.2 | 1.06E-108 | 0.382 | 5  | 7.1  | Q2 |
| IPI00549664; | TEX10    | 8.8  | 7.20E-48  | 0.384 | 8  | 4.3  | Q2 |

|              |        |      |           |       |    |      |    |
|--------------|--------|------|-----------|-------|----|------|----|
| IPI00292753; | GAPVD1 | 13.4 | 5.65E-181 | 0.384 | 18 | 24.5 | Q2 |
| IPI00291510; | IMPDH2 | 35.2 | 1.77E-257 | 0.385 | 13 | 7.9  | Q2 |
| IPI00384456; | MSH6   | 22.9 | 5.51E-293 | 0.385 | 30 | 7.5  | Q2 |
| IPI00016862; | GSR    | 8.4  | 5.49E-12  | 0.387 | 2  | 5.3  | Q2 |
| IPI00747533; | PGD    | 40.7 | <1.0E-304 | 0.390 | 15 | 5.0  | Q2 |
| IPI00556645  | FOXK1  | 2.9  | 8.25E-21  | 0.391 | 3  | 9.9  | Q2 |
| IPI00396630; | PRKACA | 14   | 7.72E-54  | 0.391 | 2  | 36.3 | Q2 |
| IPI00025849; | ANP32A | 20.9 | 6.23E-111 | 0.392 | 4  | 11.7 | Q2 |
| IPI00791117; | TK1    | 19.5 | 3.73E-39  | 0.392 | 4  | 2.1  | Q2 |
| IPI00026154; | PRKCSH | 33.3 | 8.63E-215 | 0.392 | 11 | 19.3 | Q2 |
| IPI00013847; | UQCRC1 | 17.5 | 1.50E-61  | 0.392 | 5  | 5.1  | Q2 |
| IPI00304171; | H2AFY  | 45.2 | 2.50E-172 | 0.393 | 5  | 12.2 | Q2 |
| IPI00003949; | UBE2N  | 57.9 | 1.49E-111 | 0.394 | 9  | 3.1  | Q2 |
| IPI00026813; | FNTA   | 16.4 | 5.25E-91  | 0.394 | 3  | 1.7  | Q2 |
| IPI00010400; | PLCB3  | 14.7 | 9.36E-123 | 0.395 | 18 | 7.5  | Q2 |
| IPI00472794; | FCHO2  | 2.8  | 6.07E-11  | 0.395 | 2  | 0.8  | Q2 |
| IPI00873577; | KIF23  | 2    | 1.84E-15  | 0.395 | 3  | 18.7 | Q2 |
| IPI00024971; | OSBP   | 16.7 | 4.99E-69  | 0.395 | 12 | 7.5  | Q2 |
| IPI00328243; | PLD3   | 8.4  | 5.66E-24  | 0.395 | 2  | 16.2 | Q2 |
| IPI00301263; | CAD    | 23.8 | <1.0E-304 | 0.396 | 48 | 13.8 | Q2 |
| IPI00550906  | CSTF2T | 2.8  | 7.47E-14  | 0.398 | 2  | 2.8  | Q2 |
| IPI00465256; | AK3    | 21.1 | 3.38E-74  | 0.402 | 4  | 8.3  | Q2 |
| IPI00880094; | RGNEF  | 1.7  | 1.34E-43  | 0.402 | 2  | 18.9 | Q2 |
| IPI00328987  | BYSL   | 3.9  | 1.38E-04  | 0.404 | 2  | 7.8  | Q2 |
| IPI00744637; | RUFY1  | 2.5  | 2.64E-02  | 0.405 | 3  | 38.8 | Q2 |
| IPI00013871  | RRM1   | 23   | 1.50E-114 | 0.407 | 14 | 7.1  | Q2 |
| IPI00873472; | SEC24A | 7    | 3.38E-43  | 0.409 | 7  | 8.6  | Q2 |
| IPI00021370; | UBE2K  | 50.5 | 6.38E-91  | 0.410 | 11 | 18.6 | Q2 |
| IPI00013466; | ASNA1  | 19.8 | 1.99E-68  | 0.411 | 3  | 9.6  | Q2 |
| IPI00926648; | APEH   | 13.4 | 3.97E-69  | 0.412 | 5  | 18.9 | Q2 |
| IPI00397571; | NSFL1C | 29   | 4.25E-77  | 0.412 | 7  | 6.8  | Q2 |
| IPI00178431; | RECQL  | 19.3 | 6.23E-50  | 0.413 | 9  | 4.4  | Q2 |
| IPI00478229; | RP11   | 7.3  | 8.14E-11  | 0.414 | 2  | 1.9  | Q2 |

|              |                |      |           |       |    |      |    |
|--------------|----------------|------|-----------|-------|----|------|----|
| IPI00240812; | PDS5B          | 1.7  | 4.78E-09  | 0.414 | 3  | 4.9  | Q2 |
| IPI00024670; | REEP5          | 20.6 | 3.82E-36  | 0.416 | 8  | 6.9  | Q2 |
| IPI00011592; | DYNC1LI2       | 20.3 | 5.20E-174 | 0.416 | 3  | 7.9  | Q2 |
| IPI00290192  | RNASEH2A       | 7.4  | 3.04E-02  | 0.417 | 2  | 4.3  | Q2 |
| IPI00018768; | TSN            | 29.8 | 3.72E-76  | 0.419 | 5  | 5.0  | Q2 |
| IPI00855767; | RAP1GDS1       | 15.1 | 6.29E-155 | 0.420 | 5  | 20.0 | Q2 |
| IPI00007404; | ATG7           | 3.3  | 1.10E-18  | 0.422 | 2  | 7.1  | Q2 |
| IPI00019427; | EXOC1          | 2    | 3.74E-70  | 0.423 | 2  | 15.6 | Q2 |
| IPI00015954; | SAR1A          | 43.9 | 1.48E-56  | 0.426 | 9  | 22.0 | Q2 |
| IPI00011454; | GANAB          | 40.5 | <1.0E-304 | 0.426 | 47 | 16.2 | Q2 |
| IPI00306353  | DUSP23         | 38.7 | 4.33E-40  | 0.427 | 3  | 3.5  | Q2 |
| IPI00002149; | SAR1B          | 23.2 | 5.38E-38  | 0.428 | 6  | 26.9 | Q2 |
| IPI00011416; | ECH1           | 24.7 | 1.92E-118 | 0.433 | 10 | 26.2 | Q2 |
| IPI00397947; | UBE2V1         | 22.7 | 1.12E-34  | 0.433 | 9  | 8.4  | Q2 |
| IPI00152900  | LZIC           | 19   | 6.47E-12  | 0.434 | 3  | 1.0  | Q2 |
| IPI00026215  | FEN1           | 19.2 | 2.00E-13  | 0.435 | 5  | 13.0 | Q2 |
| IPI00012007  | AHCY           | 49.5 | 9.08E-206 | 0.435 | 19 | 65.1 | Q2 |
| IPI00550746; | NUDC           | 47.4 | 3.79E-127 | 0.435 | 9  | 7.1  | Q2 |
| IPI00477494; | DRAP1          | 10.4 | 1.21E-12  | 0.436 | 2  | 11.4 | Q2 |
| IPI00797038; | PCK2           | 10.5 | 2.13E-44  | 0.436 | 7  | 14.8 | Q2 |
| IPI00015195; | CSTF3          | 11   | 3.04E-64  | 0.437 | 4  | 12.9 | Q2 |
| IPI00382985; | RNASEH2C       | 23.8 | 2.13E-14  | 0.438 | 2  | 0.4  | Q2 |
| IPI00007752; | TUBB2C         | 19.3 | <1.0E-304 | 0.438 | 12 | 41.0 | Q2 |
| IPI00219034  | NDUFA8         | 51.2 | 6.38E-63  | 0.439 | 6  | 9.4  | Q2 |
| IPI00218693; | APRT           | 62.8 | 1.04E-55  | 0.439 | 10 | 9.4  | Q2 |
| IPI00215911; | APEX1          | 44.7 | 5.49E-178 | 0.441 | 6  | 5.1  | Q2 |
| IPI00646762; | NUDT5          | 42.7 | 4.45E-103 | 0.442 | 9  | 7.5  | Q2 |
| IPI00304435; | NIPSNAP1       | 18.7 | 1.18E-13  | 0.442 | 5  | 8.2  | Q2 |
| IPI00910781; | GPI            | 37.3 | 6.55E-265 | 0.442 | 11 | 10.3 | Q2 |
| IPI00742743; | TP53BP1        | 2    | 8.87E-29  | 0.443 | 3  | 2.3  | Q2 |
| IPI00303318; | FAM49B         | 29   | 1.44E-152 | 0.446 | 11 | 6.9  | Q2 |
| IPI00872359; | DCTN1          | 21.9 | 2.21E-195 | 0.449 | 26 | 16.5 | Q2 |
| IPI00513827; | DKFZp686M24262 | 11.9 | 7.59E-08  | 0.450 | 3  | 5.9  | Q2 |



|              |           |      |           |       |    |      |    |
|--------------|-----------|------|-----------|-------|----|------|----|
| IPI00018188; | NECAP2    | 38   | 5.22E-95  | 0.451 | 3  | 2.5  | Q2 |
| IPI00465028; | TPI1      | 71.7 | <1.0E-304 | 0.451 | 37 | 24.8 | Q2 |
| IPI00169383; | PGK1      | 76.3 | <1.0E-304 | 0.453 | 22 | 49.9 | Q2 |
| IPI00297982; | EIF2S3    | 42.2 | 3.18E-168 | 0.453 | 4  | 5.8  | Q2 |
| IPI00026665; | QARS      | 43.8 | 5.04E-217 | 0.454 | 23 | 9.5  | Q2 |
| IPI00215901; | AK2       | 63.2 | 4.62E-137 | 0.454 | 15 | 12.0 | Q2 |
| IPI00334713; | HNRNPAB   | 38.6 | 1.36E-124 | 0.455 | 8  | 12.6 | Q2 |
| IPI00021728; | EIF2S2    | 40.5 | 2.04E-78  | 0.456 | 11 | 6.4  | Q2 |
| IPI00219301  | MARCKS    | 23.5 | 1.08E-59  | 0.457 | 5  | 17.9 | Q2 |
| IPI00001466; | EML4      | 4.2  | 4.67E-07  | 0.457 | 5  | 11.4 | Q2 |
| IPI00328318; | AGL       | 7.4  | 4.02E-29  | 0.463 | 11 | 5.4  | Q2 |
| IPI00005634  | TTC37     | 13.2 | 2.00E-164 | 0.466 | 20 | 26.7 | Q2 |
| IPI00219682; | STOM      | 49.7 | 1.50E-119 | 0.467 | 11 | 14.8 | Q2 |
| IPI00026964; | UQCRFS1   | 24.5 | 5.58E-30  | 0.470 | 5  | 4.2  | Q2 |
| IPI00027032; | LYPLA2    | 29.4 | 5.46E-48  | 0.472 | 7  | 5.3  | Q2 |
| IPI00290952; | RRP1B     | 9.8  | 3.74E-14  | 0.474 | 7  | 9.5  | Q2 |
| IPI00029444; | C12orf10  | 11.7 | 3.17E-43  | 0.479 | 2  | 1.1  | Q2 |
| IPI00024913; | C21orf33  | 39.9 | 3.30E-27  | 0.480 | 5  | 19.4 | Q2 |
| IPI00394788  | AARS2     | 1.9  | 9.35E-06  | 0.482 | 2  | 0.5  | Q2 |
| IPI00026942; | ERLIN2    | 21.5 | 1.85E-82  | 0.482 | 4  | 6.9  | Q2 |
| IPI00024915; | PRDX5     | 55.6 | 3.38E-248 | 0.482 | 13 | 3.8  | Q2 |
| IPI00017303; | MSH2      | 18.1 | 8.84E-76  | 0.483 | 15 | 10.1 | Q2 |
| IPI00293735  | IKBKAP    | 21.8 | 3.55E-254 | 0.483 | 26 | 15.1 | Q2 |
| IPI00552546; | C10orf119 | 11.2 | 6.08E-29  | 0.484 | 5  | 9.1  | Q2 |
| IPI00292975  | RBM27     | 3    | 6.31E-03  | 0.484 | 3  | 24.6 | Q2 |
| IPI00022774; | VCP       | 57.2 | <1.0E-304 | 0.486 | 74 | 16.8 | Q2 |
| IPI00290799; | C18orf19  | 8.8  | 8.30E-27  | 0.487 | 2  | 1.0  | Q2 |
| IPI00027192; | PLOD1     | 8.5  | 8.91E-83  | 0.488 | 6  | 8.2  | Q2 |
| IPI00181728  | BXDC2     | 21.2 | 2.10E-88  | 0.488 | 5  | 8.5  | Q2 |
| IPI00024097; | TES       | 30.4 | 1.27E-88  | 0.490 | 4  | 15.1 | Q2 |
| IPI00216654; | NOLC1     | 11.1 | 2.64E-28  | 0.491 | 10 | 12.8 | Q2 |
| IPI00298292; | PTK7      | 4.8  | 1.38E-22  | 0.492 | 5  | 7.0  | Q2 |
| IPI00916111; | MDH1      | 44.9 | 3.22E-234 | 0.493 | 14 | 11.9 | Q2 |

|              |          |      |           |       |    |      |    |
|--------------|----------|------|-----------|-------|----|------|----|
| IPI00552277; | UBL4A    | 28.3 | 1.44E-16  | 0.494 | 4  | 10.0 | Q2 |
| IPI00001699; | PYCARD   | 54.4 | 4.45E-108 | 0.494 | 8  | 14.4 | Q2 |
| IPI00412792; | BTF3L4   | 24.1 | 3.39E-21  | 0.494 | 3  | 45.2 | Q2 |
| IPI00328905  | IQGAP3   | 1.5  | 1.82E-17  | 0.495 | 2  | 2.6  | Q2 |
| IPI00008599; | EBP      | 16.5 | 7.53E-21  | 0.495 | 5  | 15.6 | Q2 |
| IPI00031681; | CDK2     | 24.2 | 2.02E-42  | 0.495 | 4  | 9.4  | Q2 |
| IPI00293078  | DDX27    | 10.1 | 5.54E-35  | 0.496 | 7  | 20.6 | Q2 |
| IPI00018274; | EGFR     | 18.6 | 6.00E-136 | 0.497 | 22 | 10.3 | Q2 |
| IPI00305383  | UQCRC2   | 32.9 | 2.36E-162 | 0.500 | 7  | 28.5 | Q3 |
| IPI00220503; | DCTN2    | 44.8 | <1.0E-304 | 0.503 | 8  | 20.2 | Q3 |
| IPI00024802  | BTAF1    | 1.6  | 9.70E-22  | 0.504 | 3  | 9.8  | Q3 |
| IPI00217413  | DHX29    | 12.6 | 2.60E-137 | 0.504 | 16 | 13.3 | Q3 |
| IPI00000001; | STAU1    | 12.8 | 2.87E-59  | 0.504 | 2  | 4.5  | Q3 |
| IPI00219825; | PSAP     | 8.9  | 1.01E-39  | 0.505 | 7  | 96.8 | Q3 |
| IPI00009923; | P4HA1    | 10.3 | 1.77E-31  | 0.505 | 4  | 9.6  | Q3 |
| IPI00017289; | SNRNP27  | 14.2 | 7.30E-05  | 0.505 | 2  | 52.9 | Q3 |
| IPI00016702; | RABGAP1  | 15.9 | 2.00E-30  | 0.506 | 18 | 21.2 | Q3 |
| IPI00298547  | PARK7    | 75.7 | 1.20E-210 | 0.507 | 19 | 5.9  | Q3 |
| IPI00005490  | GOLPH3   | 23.2 | 1.38E-137 | 0.509 | 5  | 5.2  | Q3 |
| IPI00790064; | NDUFB9   | 13.6 | 1.05E-22  | 0.512 | 2  | 9.2  | Q3 |
| IPI00021048; | MYOF     | 45.4 | <1.0E-304 | 0.513 | 94 | 8.1  | Q3 |
| IPI00010346; | NLN      | 9.7  | 9.76E-29  | 0.513 | 5  | 6.0  | Q3 |
| IPI00646556; | NDUFV2   | 13.5 | 4.54E-45  | 0.517 | 4  | 10.7 | Q3 |
| IPI00473014; | DSTN     | 50.3 | 1.24E-90  | 0.520 | 15 | 14.4 | Q3 |
| IPI00815713; | TCOF1    | 9.5  | 2.49E-106 | 0.521 | 23 | 30.8 | Q3 |
| IPI00301609  | NEK9     | 3.8  | 6.20E-07  | 0.522 | 3  | 2.9  | Q3 |
| IPI00383849; | PLCG1    | 7.4  | 8.28E-64  | 0.522 | 10 | 9.6  | Q3 |
| IPI00032134; | SERPINB8 | 20.1 | 1.98E-61  | 0.523 | 3  | 8.3  | Q3 |
| IPI00021954; | GBF1     | 11.9 | 1.21E-190 | 0.524 | 20 | 14.1 | Q3 |
| IPI00025341; | BDH1     | 8.7  | 3.31E-09  | 0.525 | 3  | 7.9  | Q3 |
| IPI00185919; | LARP1    | 21.7 | 2.55E-102 | 0.527 | 23 | 22.6 | Q3 |
| IPI00010270; | RAC2     | 22.9 | 1.84E-136 | 0.527 | 5  | 5.9  | Q3 |
| IPI00291695; | GPX8     | 24.4 | 2.80E-10  | 0.529 | 4  | 41.8 | Q3 |

|              |         |      |           |       |    |       |    |
|--------------|---------|------|-----------|-------|----|-------|----|
| IPI00016801; | GLUD1   | 46.2 | 2.31E-274 | 0.533 | 6  | 8.1   | Q3 |
| IPI00008986; | SLC7A5  | 12.6 | 6.16E-123 | 0.533 | 3  | 9.8   | Q3 |
| IPI00032206; | PDLIM4  | 30.6 | 2.51E-27  | 0.535 | 2  | 2.4   | Q3 |
| IPI00022827; | SLK     | 16.8 | 4.79E-173 | 0.535 | 23 | 11.6  | Q3 |
| IPI00884192; | GPX4    | 24.4 | 6.25E-34  | 0.537 | 4  | 18.3  | Q3 |
| IPI00797612; | WDR6    | 2    | 2.71E-04  | 0.539 | 2  | 3.0   | Q3 |
| IPI00006211; | VAPB    | 30.9 | 2.35E-72  | 0.540 | 8  | 25.8  | Q3 |
| IPI00329605  | MSH3    | 2.9  | 1.97E-08  | 0.540 | 3  | 4.0   | Q3 |
| IPI00550894; | GNPDA2  | 10.5 | 6.04E-88  | 0.541 | 2  | 4.8   | Q3 |
| IPI00027341; | CAPG    | 43.4 | 8.68E-170 | 0.542 | 9  | 24.9  | Q3 |
| IPI00026969; | SEC23IP | 15   | 3.63E-76  | 0.542 | 13 | 5.6   | Q3 |
| IPI00852685; | DIAPH1  | 29.5 | <1.0E-304 | 0.542 | 52 | 8.2   | Q3 |
| IPI00166749; | PMPCA   | 15.4 | 2.49E-24  | 0.543 | 4  | 11.0  | Q3 |
| IPI00550682; | GRHPR   | 34.6 | 6.37E-163 | 0.544 | 4  | 5.0   | Q3 |
| IPI00871728; | FAM115A | 3.7  | 1.87E-16  | 0.547 | 3  | 16.6  | Q3 |
| IPI00297261; | PTPN1   | 35.9 | 4.86E-129 | 0.550 | 9  | 15.6  | Q3 |
| IPI00183500; | NCBP2   | 16.7 | 1.26E-05  | 0.550 | 2  | 2.7   | Q3 |
| IPI00641582; | BAG3    | 17.2 | 2.80E-72  | 0.550 | 6  | 15.1  | Q3 |
| IPI00029468; | ACTR1A  | 51.1 | <1.0E-304 | 0.551 | 5  | 3.9   | Q3 |
| IPI00399265; | TPD52L2 | 52.8 | <1.0E-304 | 0.553 | 16 | 9.3   | Q3 |
| IPI00465179; | PFKM    | 12.6 | 2.17E-70  | 0.553 | 5  | 3.9   | Q3 |
| IPI00295400; | WARS    | 32.5 | 3.21E-281 | 0.554 | 3  | 8.7   | Q3 |
| IPI00173946; | TANC1   | 1.8  | 4.59E-10  | 0.554 | 3  | 6.0   | Q3 |
| IPI00657953; | TRIO    | 1.9  | 1.00E-36  | 0.555 | 5  | 30.2  | Q3 |
| IPI00154451; | MMS19   | 19.6 | 1.65E-174 | 0.555 | 15 | 7.7   | Q3 |
| IPI00025512; | HSPB1   | 78   | 2.43E-237 | 0.557 | 41 | 109.8 | Q3 |
| IPI00297113; | TRIM32  | 3.8  | 2.81E-23  | 0.562 | 2  | 0.9   | Q3 |
| IPI00887771; | DHFR    | 36.3 | 2.27E-65  | 0.563 | 8  | 17.5  | Q3 |
| IPI00100151; | XRN2    | 9.8  | 2.48E-61  | 0.563 | 8  | 8.5   | Q3 |
| IPI00303568; | PTGES2  | 21   | 1.11E-87  | 0.564 | 5  | 4.3   | Q3 |
| IPI00383163  | THYN1   | 8    | 6.40E-08  | 0.565 | 3  | 11.4  | Q3 |
| IPI00005904  | DDX20   | 8.6  | 6.32E-57  | 0.566 | 5  | 7.2   | Q3 |
| IPI00009946; | TOMM34  | 31.1 | 1.80E-86  | 0.566 | 3  | 1.0   | Q3 |

|              |         |      |           |       |    |      |    |
|--------------|---------|------|-----------|-------|----|------|----|
| IPI00058192; | POFUT1  | 10.8 | 1.44E-23  | 0.569 | 2  | 3.5  | Q3 |
| IPI00219217; | LDHB    | 54.8 | <1.0E-304 | 0.569 | 67 | 26.3 | Q3 |
| IPI00002324; | MAT2B   | 19.5 | 3.09E-51  | 0.569 | 2  | 3.0  | Q3 |
| IPI00554777; | ASNS    | 7.7  | 2.31E-173 | 0.569 | 3  | 7.1  | Q3 |
| IPI00031420  | UGDH    | 21.7 | 4.05E-81  | 0.570 | 5  | 9.6  | Q3 |
| IPI00641384; | SEC16A  | 2.7  | 1.85E-06  | 0.573 | 4  | 20.6 | Q3 |
| IPI00007146  | GIN52   | 13.5 | 7.05E-06  | 0.573 | 2  | 45.4 | Q3 |
| IPI00006987; | DDX24   | 4.5  | 2.71E-09  | 0.574 | 4  | 15.8 | Q3 |
| IPI00097495; | TBC1D2  | 8.3  | 9.28E-58  | 0.574 | 7  | 11.3 | Q3 |
| IPI00022305; | BZW2    | 15.5 | 4.13E-80  | 0.577 | 2  | 4.0  | Q3 |
| IPI00096066; | SUCLG2  | 15.7 | 9.64E-74  | 0.579 | 5  | 5.6  | Q3 |
| IPI00002966; | HSPA4   | 55.8 | <1.0E-304 | 0.579 | 54 | 7.7  | Q3 |
| IPI00554481; | SLC3A2  | 39.5 | <1.0E-304 | 0.581 | 50 | 11.9 | Q3 |
| IPI00305166; | SDHA    | 20.8 | 4.03E-122 | 0.584 | 10 | 4.6  | Q3 |
| IPI00103994; | LARS    | 42   | <1.0E-304 | 0.584 | 54 | 97.0 | Q3 |
| IPI00871808; | DDX60   | 8.9  | 7.36E-57  | 0.590 | 15 | 40.7 | Q3 |
| IPI00294911  | SDHB    | 33.2 | 7.05E-47  | 0.590 | 10 | 14.7 | Q3 |
| IPI00646500; | RPA2    | 5.6  | 1.24E-13  | 0.592 | 2  | 8.3  | Q3 |
| IPI00025974; | CHMP4B  | 32.6 | 9.90E-54  | 0.594 | 3  | 7.1  | Q3 |
| IPI00456262; | PACS1   | 3.8  | 5.44E-28  | 0.598 | 3  | 10.9 | Q3 |
| IPI00554436; | SFRS14  | 5.5  | 4.22E-52  | 0.602 | 5  | 20.4 | Q3 |
| IPI00022744; | CSE1L   | 39.2 | <1.0E-304 | 0.602 | 56 | 42.8 | Q3 |
| IPI00795107; | TATDN1  | 20.1 | 4.52E-47  | 0.603 | 5  | 13.3 | Q3 |
| IPI00884105; | LAMP1   | 12.2 | 2.43E-59  | 0.603 | 9  | 53.8 | Q3 |
| IPI00171127; | UBAP2   | 8.5  | 3.79E-123 | 0.604 | 8  | 7.0  | Q3 |
| IPI00396387; | GNL1    | 6.6  | 5.30E-22  | 0.605 | 3  | 3.7  | Q3 |
| IPI00002134; | PSMD5   | 32.9 | 2.52E-185 | 0.605 | 8  | 5.7  | Q3 |
| IPI00293533  | NUP62   | 2.7  | 3.59E-20  | 0.607 | 3  | 37.1 | Q3 |
| IPI00031131; | APMAP   | 16.8 | 7.87E-32  | 0.607 | 2  | 9.0  | Q3 |
| IPI00760715; | CAST    | 48.1 | <1.0E-304 | 0.611 | 40 | 75.9 | Q3 |
| IPI00303882; | M6PRBP1 | 46.3 | <1.0E-304 | 0.615 | 6  | 5.8  | Q3 |
| IPI00004436; | LSM1    | 21.8 | 4.80E-27  | 0.617 | 3  | 23.9 | Q3 |
| IPI00216318; | YWHAB   | 34.1 | 2.88E-209 | 0.618 | 6  | 4.3  | Q3 |

|              |          |      |           |       |    |      |    |
|--------------|----------|------|-----------|-------|----|------|----|
| IPI00790503; | MYH10    | 26.2 | <1.0E-304 | 0.621 | 47 | 15.1 | Q3 |
| IPI00794900  | MTHFD1   | 39.6 | <1.0E-304 | 0.622 | 49 | 32.8 | Q3 |
| IPI00024919; | PRDX3    | 30.9 | 4.07E-89  | 0.623 | 8  | 3.4  | Q3 |
| IPI00657692; | COL4A3BP | 5.9  | 1.07E-35  | 0.624 | 3  | 9.5  | Q3 |
| IPI00003505; | TRIP13   | 17.4 | 3.76E-68  | 0.629 | 6  | 6.5  | Q3 |
| IPI00002203; | BCCIP    | 21.7 | 1.85E-92  | 0.630 | 3  | 3.1  | Q3 |
| IPI00853400; | FKBP15   | 8.5  | 7.98E-24  | 0.632 | 7  | 21.2 | Q3 |
| IPI00003031; | ISOC2    | 23.1 | 7.93E-55  | 0.632 | 3  | 4.0  | Q3 |
| IPI00020127  | RPA1     | 15.7 | 6.15E-145 | 0.634 | 8  | 66.3 | Q3 |
| IPI00009368  | SFXN1    | 50   | 1.33E-106 | 0.634 | 14 | 12.1 | Q3 |
| IPI00879716; | NAPRT1   | 8.5  | 1.15E-48  | 0.636 | 2  | 2.7  | Q3 |
| IPI00003482; | DECR1    | 37.3 | 3.12E-97  | 0.636 | 9  | 9.4  | Q3 |
| IPI00007423; | ANP32B   | 34.7 | 1.35E-147 | 0.638 | 15 | 13.9 | Q3 |
| IPI00619921; | DIDO1    | 0.6  | 8.40E-04  | 0.639 | 2  | 2.0  | Q3 |
| IPI00014213; | LARS2    | 3.7  | 1.01E-02  | 0.640 | 5  | 51.5 | Q3 |
| IPI00217362; | TPRKB    | 8.9  | 7.28E-03  | 0.641 | 2  | 4.4  | Q3 |
| IPI00165949; | ERAP1    | 7    | 2.94E-58  | 0.641 | 6  | 9.8  | Q3 |
| IPI00019380; | NCBP1    | 10.6 | 3.07E-27  | 0.646 | 9  | 50.4 | Q3 |
| IPI00479997; | STMN1    | 63.1 | 1.33E-53  | 0.648 | 13 | 31.8 | Q3 |
| IPI00014808  | PAFAH1B3 | 14.7 | 9.47E-07  | 0.650 | 3  | 90.3 | Q3 |
| IPI00418316; | ZMYND8   | 2.1  | 4.67E-02  | 0.653 | 3  | 20.8 | Q3 |
| IPI00306369  | NSUN2    | 30.9 | 7.18E-209 | 0.656 | 20 | 7.8  | Q3 |
| IPI00171412; | SUMF2    | 22.5 | 3.00E-41  | 0.659 | 3  | 14.7 | Q3 |
| IPI00009111  | TPBG     | 11.9 | 9.80E-73  | 0.659 | 3  | 5.8  | Q3 |
| IPI00291643  | SPRYD4   | 20.8 | 1.85E-09  | 0.660 | 2  | 4.5  | Q3 |
| IPI00216260; | TSMF     | 34.4 | 2.00E-94  | 0.661 | 5  | 5.5  | Q3 |
| IPI00063827; | ABHD14B  | 44.3 | 3.06E-76  | 0.664 | 9  | 31.1 | Q3 |
| IPI00003802; | MAN2A1   | 16.9 | 1.86E-107 | 0.666 | 21 | 28.3 | Q3 |
| IPI00024129; | PPIC     | 16   | 1.61E-28  | 0.667 | 4  | 8.6  | Q3 |
| IPI00004669; | GALNT2   | 8.1  | 4.57E-25  | 0.669 | 2  | 34.0 | Q3 |
| IPI00220901; | TBC1D4   | 3.1  | 6.34E-26  | 0.670 | 3  | 9.6  | Q3 |
| IPI00016725; | GTF3C4   | 9.5  | 2.02E-63  | 0.673 | 7  | 17.5 | Q3 |
| IPI00018272; | PNPO     | 13.4 | 4.26E-07  | 0.673 | 2  | 2.8  | Q3 |

|              |          |      |           |       |     |       |    |
|--------------|----------|------|-----------|-------|-----|-------|----|
| IPI00916822; | PPIL3    | 37.2 | 3.03E-91  | 0.674 | 5   | 4.6   | Q3 |
| IPI00739827; | LAMP2    | 9    | 3.25E-08  | 0.680 | 5   | 61.8  | Q3 |
| IPI00026516; | OXCT1    | 16.5 | 3.60E-39  | 0.683 | 7   | 3.7   | Q3 |
| IPI00412441; | WAPAL    | 2.7  | 8.03E-17  | 0.684 | 3   | 4.4   | Q3 |
| IPI00000138; | MGAT1    | 8.5  | 8.90E-05  | 0.686 | 3   | 1.2   | Q3 |
| IPI00009726; | NMNAT1   | 12.5 | 1.47E-12  | 0.687 | 3   | 5.5   | Q3 |
| IPI00844050; | UQCC     | 10.4 | 4.72E-22  | 0.697 | 3   | 7.1   | Q3 |
| IPI00029656; | DFNA5    | 20   | 5.14E-95  | 0.698 | 2   | 46.8  | Q3 |
| IPI00260715; | FUS      | 13.3 | 2.24E-62  | 0.698 | 7   | 100.3 | Q3 |
| IPI00216057; | SORD     | 31.7 | 1.81E-113 | 0.699 | 3   | 5.3   | Q3 |
| IPI00017704  | COTL1    | 40.8 | 9.69E-15  | 0.699 | 6   | 14.6  | Q3 |
| IPI00010414  | PDLIM1   | 82.4 | <1.0E-304 | 0.705 | 14  | 6.0   | Q3 |
| IPI00007765; | HSPA9    | 45.8 | <1.0E-304 | 0.709 | 22  | 5.7   | Q3 |
| IPI00027350; | PRDX2    | 35.4 | 1.39E-144 | 0.710 | 13  | 85.3  | Q3 |
| IPI00783625; | SERPINB5 | 63.5 | <1.0E-304 | 0.711 | 37  | 16.8  | Q3 |
| IPI00005670; | CDC123   | 8    | 1.26E-07  | 0.712 | 2   | 2.9   | Q3 |
| IPI00658109; | CKMT1A   | 50.8 | 1.95E-261 | 0.715 | 6   | 12.0  | Q3 |
| IPI00010706; | GSS      | 24.5 | 1.23E-47  | 0.716 | 4   | 7.9   | Q3 |
| IPI00219420  | SMC3     | 24.7 | 3.25E-229 | 0.716 | 29  | 29.0  | Q3 |
| IPI00022215  | ADNP     | 5    | 3.84E-07  | 0.718 | 5   | 5.0   | Q3 |
| IPI00477231; | MGEA5    | 17.6 | 5.76E-64  | 0.718 | 16  | 11.7  | Q3 |
| IPI00913938; | IPO11    | 6.6  | 5.78E-66  | 0.723 | 5   | 10.7  | Q3 |
| IPI00298994; | TLN1     | 42.5 | <1.0E-304 | 0.724 | 116 | 9.2   | Q3 |
| IPI00011913  | HNRNPA0  | 30.8 | 3.20E-164 | 0.730 | 6   | 4.4   | Q3 |
| IPI00019755; | GSTO1    | 49.8 | 1.21E-60  | 0.737 | 14  | 3.7   | Q3 |
| IPI00026111; | TMCO1    | 24.5 | 3.47E-51  | 0.740 | 2   | 8.3   | Q3 |
| IPI00221234; | ALDH7A1  | 32.3 | 1.10E-214 | 0.741 | 6   | 52.6  | Q3 |
| IPI00170972; | C9orf64  | 17   | 2.58E-14  | 0.746 | 2   | 46.5  | Q3 |
| IPI00009949; | PSMF1    | 26.6 | 4.93E-77  | 0.748 | 7   | 21.4  | Q3 |
| IPI00217975; | LMNB1    | 25.8 | 6.68E-92  | 0.751 | 13  | 6.5   | Q3 |
| IPI00640817; | AK1      | 37.6 | 1.62E-70  | 0.753 | 10  | 10.9  | Q3 |
| IPI00923582; | SCRN1    | 17.3 | 9.70E-52  | 0.753 | 7   | 13.3  | Q3 |
| IPI00218465; | PLAA     | 13.7 | 3.80E-159 | 0.758 | 5   | 12.4  | Q3 |

|              |          |      |           |       |    |       |    |
|--------------|----------|------|-----------|-------|----|-------|----|
| IPI00307257; | TBC1D9B  | 6.6  | 3.96E-40  | 0.758 | 8  | 11.4  | Q3 |
| IPI00061108; | MRRF     | 21.4 | 8.64E-41  | 0.758 | 3  | 5.4   | Q3 |
| IPI00020984; | CANX     | 30.8 | 1.36E-211 | 0.759 | 11 | 10.4  | Q3 |
| IPI00847689; | HTATIP2  | 12.3 | 2.36E-17  | 0.760 | 3  | 5.7   | Q3 |
| IPI00005218  | MOCS2    | 8    | 5.89E-22  | 0.767 | 2  | 1.0   | Q3 |
| IPI00147874; | NANS     | 27.9 | 2.13E-61  | 0.768 | 6  | 14.1  | Q3 |
| IPI00218268; | OPRS1    | 12.1 | 4.37E-04  | 0.769 | 3  | 110.0 | Q3 |
| IPI00013004; | PDXK     | 22.1 | 2.13E-88  | 0.770 | 5  | 5.2   | Q3 |
| IPI00103142  | NUDCD2   | 30.6 | 3.42E-73  | 0.772 | 4  | 3.6   | Q3 |
| IPI00296099; | THBS1    | 33.7 | 3.92E-300 | 0.774 | 44 | 12.7  | Q3 |
| IPI00021808; | HARS     | 41.3 | 6.52E-146 | 0.775 | 6  | 17.2  | Q3 |
| IPI00026496  | NPM3     | 47.2 | 9.39E-170 | 0.775 | 6  | 7.5   | Q3 |
| IPI00023530; | CDK5     | 13   | 2.35E-05  | 0.777 | 2  | 2.1   | Q3 |
| IPI00291783  | GEMIN5   | 17.7 | 3.49E-216 | 0.778 | 26 | 6.6   | Q3 |
| IPI00845373; | NFKB2    | 3.4  | 1.21E-13  | 0.780 | 2  | 32.4  | Q3 |
| IPI00305289  | KIF11    | 14.9 | 7.27E-86  | 0.786 | 15 | 30.3  | Q3 |
| IPI00021537; | OGFR     | 6.6  | 2.02E-93  | 0.787 | 3  | 5.7   | Q3 |
| IPI00329633; | TARS     | 53.1 | <1.0E-304 | 0.790 | 36 | 15.6  | Q3 |
| IPI00007144; | RPL26L1  | 11.7 | 1.53E-18  | 0.793 | 2  | 5.5   | Q3 |
| IPI00292953; | RAI14    | 7.2  | 1.28E-24  | 0.796 | 7  | 8.6   | Q3 |
| IPI00071703; | GFM2     | 6.5  | 2.38E-22  | 0.799 | 3  | 61.2  | Q3 |
| IPI00171626  | LPCAT1   | 5.1  | 3.62E-24  | 0.802 | 2  | 2.1   | Q3 |
| IPI00021831; | PRKAR1A  | 19.2 | 4.51E-98  | 0.802 | 3  | 10.4  | Q3 |
| IPI00856098; | RRBP1    | 38.1 | <1.0E-304 | 0.803 | 69 | 10.9  | Q3 |
| IPI00172656  | FAF2     | 16.9 | 1.10E-55  | 0.805 | 4  | 4.2   | Q3 |
| IPI00374563  | AGRN     | 1.6  | 1.66E-07  | 0.812 | 4  | 17.6  | Q3 |
| IPI00299095  | SNX2     | 8.7  | 7.48E-32  | 0.814 | 3  | 7.5   | Q3 |
| IPI00010141  | POLE3    | 22.4 | 5.88E-45  | 0.826 | 4  | 14.7  | Q3 |
| IPI00807573; | PIK3R1   | 4    | 4.11E-19  | 0.828 | 2  | 10.7  | Q3 |
| IPI00844388; | HELLS    | 4.3  | 2.60E-05  | 0.829 | 4  | 10.9  | Q3 |
| IPI00643554; | RGS10    | 30.4 | 3.29E-32  | 0.836 | 3  | 25.3  | Q3 |
| IPI00218019; | BSG      | 16.9 | 2.75E-62  | 0.837 | 5  | 8.9   | Q3 |
| IPI00032140; | SERPINH1 | 55.5 | <1.0E-304 | 0.841 | 15 | 8.6   | Q3 |

|              |         |      |           |       |    |      |    |
|--------------|---------|------|-----------|-------|----|------|----|
| IPI00816415; | AKAP2   | 4.7  | 3.00E-21  | 0.842 | 5  | 8.2  | Q3 |
| IPI00028122; | PSIP1   | 8.5  | 1.53E-27  | 0.856 | 5  | 4.3  | Q3 |
| IPI00025273; | GART    | 37.5 | <1.0E-304 | 0.865 | 42 | 22.3 | Q3 |
| IPI00894395; | PSMB9   | 14.2 | 3.57E-22  | 0.865 | 3  | 31.6 | Q3 |
| IPI00908639; | HISPPD1 | 1.7  | 2.06E-03  | 0.866 | 2  | 0.2  | Q3 |
| IPI00219344; | HPCAL1  | 34.2 | 4.58E-43  | 0.876 | 4  | 9.1  | Q3 |
| IPI00829615; | SDR39U1 | 10.7 | 6.19E-04  | 0.876 | 2  | 25.4 | Q3 |
| IPI00789361; | DAB2IP  | 2.9  | 1.91E-09  | 0.878 | 3  | 21.8 | Q3 |
| IPI00221231  | NUDT2   | 37.4 | 1.94E-26  | 0.878 | 5  | 14.5 | Q3 |
| IPI00017510  | MT      | 35.2 | 1.19E-101 | 0.895 | 7  | 23.6 | Q3 |
| IPI00007940; | ERLIN1  | 11.5 | 3.17E-101 | 0.899 | 3  | 56.8 | Q3 |
| IPI00016912  | TTC1    | 9.9  | 2.35E-07  | 0.902 | 2  | 4.4  | Q3 |
| IPI00654820; | MT      | 6.8  | 3.38E-04  | 0.902 | 2  | 1.5  | Q3 |
| IPI00448095; | DCXR    | 23.8 | 2.50E-20  | 0.905 | 6  | 13.4 | Q3 |
| IPI00874235; | ERGIC1  | 14.8 | 4.70E-14  | 0.914 | 6  | 52.7 | Q3 |
| IPI00001730; | FHOD1   | 11.2 | 3.62E-85  | 0.929 | 12 | 10.5 | Q3 |
| IPI00032879; | AK6     | 23.8 | 7.90E-39  | 0.929 | 5  | 6.8  | Q3 |
| IPI00299024; | BASP1   | 33.5 | 9.29E-39  | 0.930 | 2  | 20.5 | Q3 |
| IPI00100460  | DARS2   | 4.2  | 5.55E-05  | 0.931 | 2  | 15.5 | Q3 |
| IPI00174025; | DNMBP   | 1.4  | 1.05E-13  | 0.931 | 2  | 1.8  | Q3 |
| IPI00031109  | NDUFAF2 | 52.7 | 9.41E-69  | 0.943 | 5  | 2.6  | Q3 |
| IPI00658000; | IGF2BP3 | 18   | 2.44E-120 | 0.944 | 7  | 11.3 | Q3 |
| IPI00332499; | NASP    | 23.2 | 1.92E-183 | 0.945 | 19 | 29.7 | Q3 |
| IPI00418530; | AGTPBP1 | 1.7  | 1.13E-12  | 0.947 | 2  | 17.8 | Q3 |
| IPI00848334; | KIF2A   | 12.5 | 1.83E-37  | 0.953 | 11 | 25.8 | Q3 |
| IPI00329801; | ANXA5   | 81.9 | <1.0E-304 | 0.961 | 40 | 19.1 | Q3 |
| IPI00005996; | HMGA2   | 41.3 | 7.24E-94  | 0.962 | 5  | 10.7 | Q3 |
| IPI00853454; | LAMB1   | 5.2  | 2.78E-91  | 0.965 | 10 | 28.2 | Q3 |
| IPI00917607; | HMMR    | 2.8  | 6.54E-13  | 0.969 | 2  | 18.7 | Q3 |
| IPI00302641; | FAT2    | 2.2  | 2.77E-20  | 0.974 | 9  | 13.4 | Q3 |
| IPI00011229; | CTSD    | 36.2 | <1.0E-304 | 0.977 | 22 | 73.3 | Q3 |
| IPI00009659; | RPRD1B  | 19.9 | 1.51E-27  | 0.978 | 2  | 0.3  | Q3 |
| IPI00016568; | AK3L1   | 29.1 | 4.07E-15  | 0.982 | 5  | 29.3 | Q3 |



|              |          |      |           |       |    |       |    |
|--------------|----------|------|-----------|-------|----|-------|----|
| IPI00010149; | ARL4C    | 10.9 | 1.29E-44  | 0.993 | 2  | 10.2  | Q3 |
| IPI00001734; | PSAT1    | 27.5 | 1.05E-46  | 0.998 | 7  | 13.7  | Q3 |
| IPI00020719  | MAVS     | 4.3  | 3.84E-04  | 0.999 | 2  | 4.2   | Q3 |
| IPI00334190; | STOML2   | 38.8 | 7.51E-150 | 1.005 | 7  | 20.6  | Q3 |
| IPI00295386; | CBR1     | 71.8 | <1.0E-304 | 1.011 | 15 | 6.1   | Q3 |
| IPI00549725; | PGAM1    | 67.7 | 1.77E-284 | 1.020 | 20 | 6.5   | Q3 |
| IPI00300805; | LRSAM1   | 4.6  | 4.04E-07  | 1.021 | 3  | 0.8   | Q3 |
| IPI00216225; | ITGA6    | 26.5 | 9.43E-219 | 1.021 | 32 | 22.5  | Q3 |
| IPI00375631  | ISG15    | 41.2 | 1.43E-88  | 1.054 | 8  | 47.9  | Q3 |
| IPI00003327  | ARL3     | 47.3 | 5.50E-112 | 1.066 | 7  | 11.2  | Q3 |
| IPI00002745; | CTSZ     | 15.8 | 8.77E-41  | 1.071 | 3  | 1.2   | Q3 |
| IPI00010130; | GLUL     | 7    | 1.09E-04  | 1.085 | 2  | 42.7  | Q3 |
| IPI00009950  | LMAN2    | 27.5 | 1.31E-88  | 1.106 | 3  | 52.8  | Q3 |
| IPI00013002; | UBE2C    | 31.8 | 3.04E-49  | 1.107 | 6  | 22.6  | Q3 |
| IPI00219029; | GOT1     | 41.2 | 5.06E-147 | 1.115 | 7  | 8.9   | Q3 |
| IPI00011200; | PHGDH    | 31.1 | 1.51E-152 | 1.134 | 8  | 176.2 | Q3 |
| IPI00045839; | LEPRE1   | 2.7  | 5.67E-08  | 1.160 | 2  | 41.1  | Q3 |
| IPI00023122; | PDLIM7   | 16   | 1.34E-24  | 1.171 | 3  | 7.5   | Q3 |
| IPI00329573; | COL12A1  | 7    | 4.67E-47  | 1.171 | 19 | 14.8  | Q3 |
| IPI00029111; | LCRMP    | 4.2  | 1.87E-24  | 1.177 | 2  | 9.2   | Q3 |
| IPI00654731; | DDX58    | 13.5 | 3.49E-110 | 1.180 | 11 | 69.9  | Q3 |
| IPI00022462; | TFRC     | 29.9 | 9.08E-174 | 1.186 | 24 | 56.7  | Q3 |
| IPI00026314; | GSN      | 43.6 | <1.0E-304 | 1.187 | 31 | 9.4   | Q3 |
| IPI00008485; | ACO1     | 13.4 | 5.00E-98  | 1.228 | 9  | 7.2   | Q3 |
| IPI00552634; | C20orf27 | 13.1 | 2.65E-03  | 1.243 | 2  | 3.8   | Q3 |
| IPI00472451; | VAV2     | 3.8  | 3.76E-61  | 1.249 | 4  | 14.8  | Q3 |
| IPI00009305; | GNPDA1   | 46   | 7.91E-115 | 1.252 | 12 | 19.9  | Q3 |
| IPI00220709; | TPM2     | 26.1 | 1.05E-121 | 1.258 | 2  | 0.9   | Q3 |
| IPI00847342; | KRT7     | 56.1 | <1.0E-304 | 1.274 | 36 | 53.5  | Q3 |
| IPI00007702; | HSPA2    | 11.6 | 7.04E-272 | 1.284 | 5  | 6.1   | Q3 |
| IPI00018352; | UCHL1    | 33.2 | 7.07E-32  | 1.305 | 5  | 72.3  | Q3 |
| IPI00002406; | BCAM     | 10.8 | 2.55E-119 | 1.315 | 5  | 29.8  | Q3 |
| IPI00220644; | PKM2     | 3.2  | <1.0E-304 | 1.324 | 3  | 17.2  | Q3 |

|              |         |      |           |       |    |       |    |
|--------------|---------|------|-----------|-------|----|-------|----|
| IPI00220644; | PKM2    | 3.2  | <1.0E-304 | 1.324 | 3  | 17.2  | Q3 |
| IPI00063962; | DPCD    | 27.1 | 3.15E-22  | 1.340 | 5  | 6.9   | Q3 |
| IPI00022078; | NDRG1   | 30.7 | 3.11E-189 | 1.348 | 5  | 7.7   | Q3 |
| IPI00034181; | RBBP9   | 12.9 | 1.29E-03  | 1.358 | 2  | 5.5   | Q3 |
| IPI00871988; | SFXN3   | 41.3 | 1.29E-182 | 1.358 | 9  | 8.5   | Q3 |
| IPI00794221; | DBN1    | 19.4 | 3.45E-256 | 1.359 | 10 | 76.3  | Q3 |
| IPI00178352; | FLNC    | 0.8  | 5.63E-113 | 1.411 | 2  | 134.0 | Q3 |
| IPI00011876; | MTAP    | 60.3 | 2.42E-266 | 1.448 | 22 | 23.7  | Q3 |
| IPI00025418; | COL7A1  | 1.9  | 1.33E-124 | 1.476 | 4  | 9.9   | Q3 |
| IPI00002459; | ANXA6   | 50.5 | 7.25E-281 | 1.480 | 21 | 13.5  | Q3 |
| IPI00337541  | NNT     | 11.4 | 4.75E-85  | 1.622 | 9  | 31.6  | Q3 |
| IPI00295388; | GLDC    | 6.2  | 3.91E-22  | 1.632 | 4  | 167.1 | Q3 |
| IPI00103467  | ALDH1B1 | 6.8  | 4.05E-31  | 1.672 | 3  | 13.5  | Q3 |
| IPI00000151; | ITGB6   | 3.6  | 2.75E-72  | 1.682 | 2  | 6.0   | Q3 |
| IPI00008868; | MAP1B   | 1.3  | 9.89E-22  | 1.728 | 3  | 19.1  | Q3 |
| IPI00005682  | HSD11B1 | 14.7 | 7.34E-07  | 1.932 | 3  | 16.6  | Q3 |
| IPI00020632; | ASS1    | 6.4  | 1.04E-12  | 1.936 | 3  | 8.1   | Q3 |
| IPI00418471; | VIM     | 76.4 | <1.0E-304 | 1.985 | 48 | 71.5  | Q3 |
| IPI00000643; | BAG2    | 24.6 | 3.94E-18  | 2.316 | 4  | 12.7  | Q3 |
| IPI00921911; | CRIP2   | 17   | 1.42E-128 | 2.555 | 2  | 3.7   | Q3 |
| IPI00748788; | MTM1    | 2.5  | 1.80E-02  | 2.575 | 5  | 88.3  | Q3 |
| IPI00845263; | FN1     | 13.5 | <1.0E-304 | 2.727 | 22 | 22.3  | Q3 |
| IPI00022977; | CKB     | 18.9 | 3.93E-108 | 2.923 | 6  | 57.1  | Q3 |
| IPI00303300; | FKBP10  | 8.1  | 2.73E-73  | 3.107 | 4  | 17.5  | Q3 |
| IPI00018219; | TGFBI   | 5    | 1.50E-04  | 3.156 | 2  | 27.4  | Q3 |
| IPI00016480; | NLRP2   | 2.7  | 4.85E-07  | 3.156 | 3  | 23.4  | Q3 |
| IPI00382958; | 0       | 13.6 | 4.66E-100 | 3.352 | 3  | 191.9 | Q3 |
| IPI00741030  | C8orf73 | 1.7  | 3.18E-01  | 4.037 | 3  | 108.4 | Q3 |
| IPI00289334; | FLNB    | 2.4  | <1.0E-304 | 4.760 | 4  | 46.1  | Q3 |
| IPI00001560; | CDKN2A  | 37.7 | 9.51E-68  | 5.434 | 7  | 51.9  | Q3 |
